# Supplementary material for: Integrated analysis of H2A.Z isoforms function reveals a complex interplay in gene regulation
Source: eLife. 2020 Feb 28;9:e53375. doi: 10.7554/eLife.53375 (PMC7048395; doi:10.7554/eLife.53375)
Supplement: Figure 1—source data 1. — Z.1 and H2A.Z.2 in response to siRNAs in Figure 1A. [file elife-53375-fig1-data1.xlsx]

## Sheet:  N1
Title: Source Data of the depletion of H2A.Z.1 and H2A.Z.2 in reponse to siRNAs in Figure 1A
H2AZ1	Ct	Calculated quantity	Mean	Mean GAPDH	Mean/GAPDH	/siC
siC	21.5633	354805	328012	1.10035e+07	0.0298098	1
siC	21.7729	306839
siC	21.7015	322393
siZ1	24.3862	50145.1	47087.3	9.5992e+06	0.00490534	0.164555
siZ1	24.4931	46562.8
siZ1	24.5567	44554
siZ2	21.665	330673	327034	1.61864e+07	0.0202042	0.677771
siZ2	21.7866	303937
siZ2	21.5975	346493
siZ1+2	24.8361	36710.2	34530.1	1.01028e+07	0.00341787	0.114656
siZ1+2	25.0185	32350
siZ1+2	NA (problem)
H2AZ2	Ct	Calculated quantity	Mean	Mean GAPDH	Mean/GAPDH	/siC
siC	22.938	136832	146989	1.10035e+07	0.0133584	1
siC	22.7134	159875
siC	22.8617	144260
siZ1	23.1076	121648	119959	9.5992e+06	0.0124968	0.935506
siZ1	23.2174	112740
siZ1	23.0628	125490
siZ2	24.9735	33374.9	32464.9	1.61864e+07	0.00200568	0.150144
siZ2	24.8857	35468.7
siZ2	25.1987	28551.1
siZ1+2	25.4108	24647.9	27070	1.01028e+07	0.00267945	0.200582
siZ1+2	25.2824	26942.6
siZ1+2	25.1457	29619.3
GAPDH	Ct	Calculated quantity	Mean
siC	16.7047	1.02938e+07	1.10035e+07
siC	16.6118	1.09788e+07
siC	16.5153	1.1738e+07
siZ1	16.8521	9.29436e+06	9.5992e+06
siZ1	16.719	1.01928e+07
siZ1	16.8496	9.31043e+06
siZ2	16.0608	1.6085e+07	1.61864e+07
siZ2	15.9642	1.71986e+07
siZ2	16.1353	1.52757e+07
siZ1+2	16.7461	1.00031e+07	1.01028e+07
siZ1+2	16.7745	9.80786e+06
siZ1+2	16.6765	1.04975e+07

## Sheet: N2
Title: Source Data of the depletion of H2A.Z.1 and H2A.Z.2 in reponse to siRNAs in Figure 1A
H2AZ1	Ct	Calculated quantity	Mean	Mean GAPDH	Mean/GAPDH	/siC
siC	21.6039	344956	341811	1.16541e+07	0.0293298	1
siC	21.622	340671
siC	21.6256	339807
siZ1	24.5399	45076	45283.7	1.08237e+07	0.00418377	0.142646
siZ1	24.6275	42422.4
siZ1	24.4387	48352.8
siZ2	21.8249	295963	344368	1.20962e+07	0.028469	0.970651
siZ2	21.5875	348900
siZ2	21.4334	388241
siZ1+2	24.6402	42050.4	42014.9	9.54426e+06	0.00440212	0.15009
siZ1+2	24.6426	41979.5
siZ1+2	24.6795
H2AZ2	Ct	Calculated quantity	Mean	Mean GAPDH	Mean/GAPDH	/siC
siC	22.8681	143620	157103	1.16541e+07	0.0134806	1
siC	22.6457	167563
siC	22.7111	160126
siZ1	21.5396	360694	202895	1.08237e+07	0.0187455	1.39056
siZ1	23.0795	124043
siZ1	23.0806	123948
siZ2	25.1352	29836.8	25803.7	1.20962e+07	0.0021332	0.158243
siZ2	25.3559	25603.8
siZ2	25.5767	21970.6
siZ1+2	25.1905	28714.1	29317	9.54426e+06	0.00307169	0.227861
siZ1+2	24.9788	33252.8
siZ1+2	25.3347	25984.1
GAPDH	Ct	Calculated quantity	Mean
siC	16.7308	1.01096e+07	1.16541e+07
siC	16.3296	1.33501e+07
siC	16.5446	1.15024e+07
siZ1	16.6716	1.05331e+07	1.08237e+07
siZ1	16.5979	1.10851e+07
siZ1	16.6284	1.08528e+07
siZ2	16.5074	1.18025e+07	1.20962e+07
siZ2	16.4684	1.21263e+07
siZ2	16.4408	1.23599e+07
siZ1+2	16.781	9.7637e+06	9.54426e+06
siZ1+2	16.8556	9.27156e+06
siZ1+2	16.8058	9.59751e+06

## Sheet: N3
Title: Source Data of the depletion of H2A.Z.1 and H2A.Z.2 in reponse to siRNAs in Figure 1A
H2AZ1	Ct	Calculated quantity	Mean	Mean GAPDH	Mean/GAPDH	/siC
siC	18.9861	2.11751e+06	2.15586e+06	2.57642e+07	0.0836768	1
siC	18.9347	2.19422e+06
siZ1	23.5045	92396.4	95392.2	1.70533e+07	0.00559376	0.0668496
siZ1	23.4138	98387.9
siZ2	19.5864	1.39669e+06	1.45634e+06	3.74298e+07	0.0389085	0.464985
siZ2	19.4682	1.51598e+06
siZ1+2	23.2201	112527	121327	2.14155e+07	0.00566537	0.0677054
Z1+2	23.0104	130127
H2AZ2	Ct	Calculated quantity	Mean	Mean GAPDH	Mean/GAPDH	/siC
siC	21.2847	430404	445178	2.57642e+07	0.0172789	1
siC	21.1889	459951
siZ1	22.2727	216989	224405	1.70533e+07	0.013159	0.761564
siZ1	22.1773	231821
siZ2	23.9787	66509.9	66676	3.74298e+07	0.00178136	0.103094
siZ2	23.9715	66842.1
Z1+2	24.4917	46609.3	52070.9	2.14155e+07	0.00243146	0.140718
Z1+2	24.1879	57532.5
GAPDH	Ct	Calculated quantity	Mean
siC	15.4637	2.43312e+07	2.57642e+07
siC	15.303	2.71971e+07
siZ1	15.9987	1.67926e+07	1.70533e+07
siZ1	15.9546	1.7314e+07
siZ2	14.7974	3.86126e+07	3.74298e+07
siZ2	14.8886	3.62469e+07
Z1+2	15.684	2.0885e+07	2.14155e+07
Z1+2	15.6125	2.1946e+07

## Sheet: N4
Title: Source Data of the depletion of H2A.Z.1 and H2A.Z.2 in reponse to siRNAs in Figure 1A
H2AZ1	Ct	Calculated quantity	Mean	Mean GAPDH	Mean/GAPDH	/siC
siC	20.0004	1.0483e+06	959918	2.68272e+07	0.0357815	1
siC	20.2668	871540
siZ1	23.3024	106286	112998	2.1783e+07	0.00518744	0.144975
siZ1	23.1308	119710
siZ2	20.6235	680613	811897	3.79952e+07	0.0213684	0.597192
siZ2	20.1528	943180
siZ1+2	23.5167	91615.9	90279.6	2.24007e+07	0.00403021	0.112634
siZ1+2	23.5594	88943.3
H2AZ2	Ct	Calculated quantity	Mean	Mean GAPDH	Mean/GAPDH	/siC
siC	21.6035	345055	313435	2.68272e+07	0.0116834	1
siC	21.8956	281814
siZ1	21.7656	308382	327878	2.1783e+07	0.015052	1.28832
siZ1	21.5939	347374
siZ2	23.9386	68387.3	64296.1	3.79952e+07	0.00169222	0.144839
siZ2	24.1224	60204.8
siZ1+2	24.0304	64169.7	63045.3	2.24007e+07	0.00281443	0.240891
siZ1+2	24.0819	61920.8
GAPDH	Ct	Calculated quantity	Mean	Mean GAPDH	Mean/GAPDH	/siC
siC	15.2454	2.83061e+07	2.68272e+07
siC	15.4046	2.53484e+07
siZ1	15.6433	2.14825e+07	2.1783e+07
siZ1	15.6035	2.20835e+07
siZ2	14.8157	3.81257e+07	3.79952e+07
siZ2	14.8257	3.78647e+07
siZ1+2	15.5953	2.22099e+07	2.24007e+07
siZ1+2	15.5707	2.25915e+07

## Sheet: N5
Title: Source Data of the depletion of H2A.Z.1 and H2A.Z.2 in reponse to siRNAs in Figure 1A
H2AZ1	Ct	Qt Calculé	Moyennes	moyennes GAPDH	moy/GAPDH	/siC
siC	20.8025	601209	579001	2.13021e+07	0.0271805	1
siC	20.9132	556793
siZ1	24.2883	53666.1	57352.8	1.70634e+07	0.00336116	0.123661
siZ1	24.1025	61039.5
siZ2	21.1569	470268	456521	2.25479e+07	0.0202467	0.744897
siZ2	21.2438	442774
siZ1+2	25.8428	18270	17288.3	1.04824e+07	0.00164926	0.0606781
siZ1+2	26.0068	16306.6
H2AZ2	Ct	Qt Calculé	Moyennes	moyennes GAPDH	moy/GAPDH	/siC
siC	22.1506	236153	230314	2.13021e+07	0.0108118	1
H2AZ2	22.2238	224475
siZ1	22.2907	214303	211238	1.70634e+07	0.0123796	1.14501
siZ1	22.3326	208173
siZ2	25.0044	32669.3	31937.2	2.25479e+07	0.00141641	0.131006
siZ2	25.0705	31205.1
siZ1+2	25.8086	18708.3	18336.8	1.04824e+07	0.00174929	0.161794
siZ1+2	25.8671	17965.3
GAPDH	Ct	Qt Calculé	Moyennes
siC	15.6693	2.10991e+07	2.13021e+07
siC	15.6418	2.1505e+07
siZ1	15.8087	1.91566e+07	1.70634e+07
siZ1	16.1644	1.49702e+07
siZ2	15.5962	2.21964e+07	2.25479e+07
siZ2	15.5512	2.28995e+07
siZ1+2	16.6731	1.05219e+07	1.04824e+07
siZ1+2	16.684	1.0443e+07

## Sheet: Summmary
Title: Source Data of the depletion of H2A.Z.1 and H2A.Z.2 in reponse to siRNAs in Figure 1A
H2AZ1	N=1	N=2	N=3	N=4	N=5	Mean	Error Bars
siC	1	1	1	1	1	1	0
siZ1	0.164555	0.142646	0.0668496	0.144975	0.123661	0.128537	0.0167267
siZ2	0.677771	0.970651	0.464985	0.597192	0.744897	0.691099	0.0840141
siZ1+2	0.114656	0.148786	0.0677054	0.112634	0.0606781	0.100892	0.0163396
H2AZ2	N=1	N=2	N=3	N=4	N=5	Mean	Error Bars
siC	1	1	1	1	1	1	0
siZ1	0.935506	1.39056	0.761564	1.28832	1.14501	1.10419	0.114766
siZ2	0.150144	0.158243	0.103094	0.144839	0.131006	0.137465	0.00966933
siZ1+2	0.200582	0.227861	0.140718	0.240891	0.161794	0.194369	0.019058
