# Supplementary material for: Integrated analysis of H2A.Z isoforms function reveals a complex interplay in gene regulation
Source: eLife. 2020 Feb 28;9:e53375. doi: 10.7554/eLife.53375 (PMC7048395; doi:10.7554/eLife.53375)
Supplement: Figure 2—figure supplement 1—source data 1. [file elife-53375-fig2-figsupp1-data1.xlsx]

## Sheet: N1
Title: Source data of the histogramme representing the validation of RNA-seq effects by RT-qPCR on Figure 2 - Figure supplement 1
ZDHHC20		Ct	Calculated quantity	Mean	Mean GAPDH	Mean/GAPDH	/siC
A01	siC n1	22.9285	137731	122260	2.0921e+07	0.00584388	1
A02	siC n1	23.2956	106789
A03	siZ1 n1	21.2986	426269	471514	1.95436e+07	0.0241263	4.12847
A04	siZ1 n1	21.0209	516760
A05	siZ2 n1	21.4995	370865	366054	1.95766e+07	0.0186986	3.19968
A06	siZ2 n1	21.5374	361243
A07	siZ1+2 n1	21.7617	309218	298175	1.47602e+07	0.0202013	3.45683
A08	siZ1+2 n1	21.8686	287132
COLEC12		Ct	Calculated quantity	Mean	Mean GAPDH	Mean/GAPDH	/siC
C01	siC n1	23.7013	80610.1	79302	2.0921e+07	0.00379055	1
C02	siC n1	23.7489	77994
C03	siZ1 n1	24.4078	49400.1	52490.3	1.95436e+07	0.00268581	0.708553
C04	siZ1 n1	24.2377	55580.5
C05	siZ2 n1	21.7303	316033	322422	1.95766e+07	0.0164698	4.34496
C06	siZ2 n1	21.6731	328811
C07	siZ1+2 n1	23.537	90336.4	88565.5	1.47602e+07	0.0060003	1.58296
C08	siZ1+2 n1	23.5947	86794.6
AKAP12		Ct	Calculated quantity	Mean	Mean GAPDH	Mean/GAPDH	/siC
D01	siC n1	22.7625	154524	159166	2.0921e+07	0.00760799	1
D02	siC n1	22.6784	163808
D03	siZ1 n1	21.6224	340582	355217	1.95436e+07	0.0181756	2.38902
D04	siZ1 n1	21.5034	369852
D05	siZ2 n1	23.7525	77800.3	76304.4	1.95766e+07	0.00389774	0.512322
D06	siZ2 n1	23.8091	74808.6
D07	siZ1+2 n1	22.0486	253463	255123	1.47602e+07	0.0172846	2.2719
D08	siZ1+2 n1	22.0298	256783
ADAM-TS1		Ct	Calculated quantity	Mean	Mean GAPDH	Mean/GAPDH	/siC
E01	siC n1	20.6411	672394	688043	2.0921e+07	0.0328877	1
E02	siC n1	20.5754	703693
E03	siZ1 n1	21.8299	294945	310900	1.95436e+07	0.015908	0.483707
E04	siZ1 n1	21.6817	326855
E05	siZ2 n1	18.7611	2.47475e+06	2.40114e+06	1.95766e+07	0.122654	3.72947
E06	siZ2 n1	18.8496	2.32753e+06
E07	siZ1+2 n1	21.3385	414646	402833	1.47602e+07	0.0272919	0.82985
E08	siZ1+2 n1	21.4231	391020
RRM2		Ct	Calculated quantity	Mean	Mean GAPDH	Mean/GAPDH	/siC
F01	siC n1	21.2815	431364	409306	2.0921e+07	0.0195644	1
F02	siC n1	21.4371	387247
F03	siZ1 n1	22.4784	188162	221943	1.95436e+07	0.0113563	0.580458
F04	siZ1 n1	22.0358	255724
F05	siZ2 n1	22.9772	133158	135121	1.95766e+07	0.00690217	0.352793
F06	siZ2 n1	22.9353	137084
F07	siZ1+2 n1	23.0196	129299	125410	1.47602e+07	0.00849653	0.434286
F08	siZ1+2 n1	23.1092	121521
PLAT		Ct	Calculated quantity	Mean	Mean GAPDH	Mean/GAPDH	/siC
A01	siC n1	20.9787	532089	523895	2.09846e+07	0.0249658	1
A02	siC n1	21.0238	515701
A03	siZ1 n1	19.2971	1.70681e+06	1.73063e+06	1.88409e+07	0.0918547	3.67923
A04	siZ1 n1	19.2574	1.75444e+06
A05	siZ2 n1	21.5264	364017	344974	1.77795e+07	0.0194029	0.777182
A06	siZ2 n1	21.6858	325931
A07	siZ1+2 n1	20.9013	561407	561407	1.33931e+07	0.0419176	1.679
GAPDH		Ct	Calculated quantity	Mean	Mean GAPDH	Mean/GAPDH	/siC
G01	siC n1	15.6464	2.14363e+07	2.0921e+07
G02	siC n1	15.7175	2.04057e+07
G03	siZ1 n1	15.8522	1.85877e+07	1.95436e+07
G04	siZ1 n1	15.7109	2.04995e+07
G05	siZ2 n1	15.8229	1.89684e+07	1.95766e+07
G06	siZ2 n1	15.7332	2.01847e+07
G07	siZ1+2 n1	16.1307	1.53242e+07	1.47602e+07
G08	siZ1+2 n1	16.241	1.41961e+07

## Sheet: N2
Title: Source data of the histogramme representing the validation of RNA-seq effects by RT-qPCR on Figure 2 - Figure supplement 1
ZDHHC20		Ct	Calculated quantity	Mean	Mean GAPDH	Mean/GAPDH	/siC
A01	siC n1	23.2921	107048	112711	2.12728e+07	0.00529837	1
A02	siC n1	23.147	118374
A03	siZ1 n1	21.4868	374147	369216	1.78962e+07	0.020631	3.89383
A04	siZ1 n1	21.5253	364286
A05	siZ2 n1	21.3446	412887	392534	2.51336e+07	0.0156179	2.94768
A06	siZ2 n1	21.4944	372181
A07	siZ1+2 n1	21.2258	448332	508477	2.03342e+07	0.0250059	4.71955
A08	siZ1+2 n1	20.8829	568622
COLEC12		Ct	Calculated quantity	Mean	Mean GAPDH	Mean/GAPDH	/siC
C01	siC n1	23.5182	91518.8	91456.6	2.12728e+07	0.00429923	1
C02	siC n1	23.5202	91394.5
C03	siZ1 n1	24.0528	63180.6	68262.3	1.78962e+07	0.00381435	0.887215
C04	siZ1 n1	23.8376	73344.1
C05	siZ2 n1	21.7053	321553	312875	2.51336e+07	0.0124485	2.89551
C06	siZ2 n1	21.7854	304197
C07	siZ1+2 n1	22.9713	133707	139724	2.03342e+07	0.00687136	1.59827
C08	siZ1+2 n1	22.847	145741
AKAP12		Ct	Calculated quantity	Mean	Mean GAPDH	Mean/GAPDH	/siC
D01	siC n1	23.0413	127372	148312	2.12728e+07	0.0069719	1
D02	siC n1	22.6312	169251
D03	siZ1 n1	21.8812	284652	261733	1.78962e+07	0.0146251	2.09771
D04	siZ1 n1	22.1345	238814
D05	siZ2 n1	23.5054	92337.1	92094.3	2.51336e+07	0.00366419	0.525565
D06	siZ2 n1	23.513	91851.5
D07	siZ1+2 n1	21.5514	357742	485980	2.03342e+07	0.0238996	3.42799
D08	siZ1+2 n1	20.7716	614218
ADAM-TS1		Ct	Calculated quantity	Mean	Mean GAPDH	Mean/GAPDH	/siC
E01	siC n1	20.8445	583946	979905	2.12728e+07	0.0460638	1
E02	siC n1	19.6081	1.37586e+06
E03	siZ1 n1	22.1199	241238	241030	1.78962e+07	0.0134682	0.292381
E04	siZ1 n1	22.1224	240822
E05	siZ2 n1	18.8777	2.28273e+06	2.23014e+06	2.51336e+07	0.0887315	1.92627
E06	siZ2 n1	18.9457	2.17755e+06
E07	siZ1+2 n1	20.7575	620273	633245	2.03342e+07	0.0311418	0.676058
E08	siZ1+2 n1	20.6983	646217
RRM2		Ct	Calculated quantity	Mean	Mean GAPDH	Mean/GAPDH	/siC
F01	siC n1	20.9338	548892	526970	2.12728e+07	0.024772	1
F02	siC n1	21.0539	505048
F03	siZ1 n1	22.4071	197686	192858	1.78962e+07	0.0107765	0.435026
F04	siZ1 n1	22.4794	188030
F05	siZ2 n1	21.9098	279063	279714	2.51336e+07	0.0111291	0.449259
F06	siZ2 n1	21.9031	280364
F07	siZ1+2 n1	22.5178	183096	179815	2.03342e+07	0.00884296	0.356973
F08	siZ1+2 n1	22.5704	176534
PLAT		Ct	Calculated quantity	Mean	Mean GAPDH	Mean/GAPDH	/siC
A01	siC n2	20.7004	645279	633119	2.12728e+07	0.029762	1
A02	siC n2	20.7559	620959
A03	siZ1 n2	19.6168	1.36757e+06	1.36499e+06	1.78962e+07	0.0762725	2.56275
A04	siZ1 n2	19.6223	1.3624e+06
A05	siZ2 n2	21.2054	454718	453605	2.51336e+07	0.0180478	0.606404
A06	siZ2 n2	21.2125	452493
A07	siZ1+2 n2	20.1702	931910	903669	2.03342e+07	0.0444408	1.49321
A08	siZ1+2 n2	20.2604	875429
GAPDH		Ct	Calculated quantity	Mean
G01	siC n1	15.7692	1.96879e+07	2.12728e+07
G02	siC n1	15.5538	2.28576e+07
G03	siZ1 n1	15.9341	1.75611e+07	1.78962e+07
G04	siZ1 n1	15.8801	1.82313e+07
G05	siZ2 n1	15.3919	2.55727e+07	2.51336e+07
G06	siZ2 n1	15.4423	2.46945e+07
G07	siZ1+2 n1	15.6675	2.11254e+07	2.03342e+07
G08	siZ1+2 n1	15.7798	1.95431e+07
G09	H2O
G10	H2O	35.3822
		37.3082
		34.5216
