# Supplementary material for: Integrated analysis of H2A.Z isoforms function reveals a complex interplay in gene regulation
Source: eLife. 2020 Feb 28;9:e53375. doi: 10.7554/eLife.53375 (PMC7048395; doi:10.7554/eLife.53375)
Supplement: Figure 2—figure supplement 2—source data 1. [file elife-53375-fig2-figsupp2-data1.xlsx]

## Sheet: n1
Title: Source Data for the histogrammes representing the effect of a second siRNA H2A.Z.2 (siH2A.Z.2#) on Figure 2 - Figure supplement 2
ZDHHC20	Ct	Calculated quantity	Means	moyennes GAPDH	/GAPDH	/siCtrl
siCtrl	23.6025	86326.1	88589.2	3.10281e+07	0.00285512	1
siCtrl	23.5288	90852.2
siZ2#	20.9187	554683	532017	2.17555e+07	0.0244544	8.56508
iZ2#	21.0417	509351
COLEC12	Ct	Calculated quantity	Means	moyennes GAPDH	/GAPDH	/siCtrl
siCtrl	23.5209	91350.6	90471.2	3.10281e+07	0.00291578	1
siCTrl	23.5489	89591.9
siZ2#	22.2607	218811	213001	2.17555e+07	0.00979067	3.35782
iZ2#	22.3394	207191
AKAP12	Ct	Calculated quantity	Means	moyennes GAPDH	/GAPDH	/siCtrl
siCtrl	22.5831	174984	175357	3.10281e+07	0.00565155	1
siCtrl	22.577	175730
siZ2#	24.2575	54824.7	56684.8	2.17555e+07	0.00260554	0.46103
iZ2#	24.1627	58544.8
ADAMTS1	Ct	Calculated quantity	Means	moyennes GAPDH	/GAPDH	/siCtrl
siCtrl	20.6077	688135	696143	3.10281e+07	0.0224359	1
siCtrl	20.5745	704151
siZ2#	17.7445	5.00682e+06	4.7491e+06	2.17555e+07	0.218294	9.7297
iZ2#	17.9013	4.49138e+06
RRM2	Ct	Calculated quantity	Means	moyennes GAPDH	/GAPDH	/siCtrl
siCtrl	21.5136	367238	382556	3.10281e+07	0.0123293	1
siCtrl	21.398	397874
siZ2#	22.7586	154942	155083	2.17555e+07	0.00712847	0.578172
iZ2#	22.756	155225
PLAT	Ct	Calculated quantity	Means	moyennes GAPDH	/GAPDH	/siCtrl
siCtrl	20.424	781551	775360	3.10281e+07	0.024989	1
siCtrl	20.4471	769170
siZ2#	20.0148	1.0379e+06	1.07683e+06	2.17555e+07	0.049497	1.98076
iZ2#	19.9104	1.11576e+06
GAPDH	Ct	Calculated quantity	Means	moyennes GAPDH
siCtrl	15.1651	2.99257e+07	3.10281e+07	3.10281e+07
siCtrl	15.0626	3.21305e+07
siZ2#	15.6721	2.1059e+07	2.17555e+07	2.17555e+07
iZ2#	15.5797	2.2452e+07
H2A.Z.1	Ct	Calculated quantity	Means	moyennes GAPDH	/GAPDH	/siCtrl
siCtrl	19.6378	1.34784e+06	1.29187e+06	3.10281e+07	0.0416355	1
siCtrl	19.7629	1.23591e+06
siZ2#	20.2771	865314	883354	2.17555e+07	0.0406037	0.97522
iZ2#	20.2182	901395
H2A.Z.2	Ct	Calculated quantity	Means	moyennes GAPDH	/GAPDH	/siCtrl
siCtrl	21.6019	345458	344745	3.10281e+07	0.0111107	1
siCtrl	21.6078	344033
siZ2#	24.7483	39014	38548	2.17555e+07	0.00177188	0.159474
iZ2#	24.7832	38082

## Sheet: n2
Title: Source Data for the histogrammes representing the effect of a second siRNA H2A.Z.2 (siH2A.Z.2#) on Figure 2 - Figure supplement 2
ZDHHC20	Ct	Calculated quantity	Means	moyennes GAPDH	/GAPDH	/siCtrl
siCtrl	25.1307	29929	30551.8	5.24154e+06	0.00582878	1
siCtrl	25.0719	31174.5
siZ2#	21.5557	356680	353763	1.69998e+07	0.0208098	3.57019
iZ2#	21.5795	350845
COLEC12	Ct	Calculated quantity	Means	moyennes GAPDH	/GAPDH	/siCtrl
siCtrl	25.6803	20448.6	20971.4	5.24154e+06	0.00400099	1
siCTrl	25.6083	21494.1
siZ2#	23.0988	122399	123034	1.69998e+07	0.00723736	1.80889
iZ2#	23.0839	123668
AKAP12	Ct	Calculated quantity	Means	moyennes GAPDH	/GAPDH	/siCtrl
siCtrl	22.8917	141290	125491	5.24154e+06	0.0239415	1
siCtrl	23.2569	109691
siZ2#	23.8954	70465.3	68962	1.69998e+07	0.00405664	0.169439
iZ2#	23.9583	67458.6
ADAMTS1	Ct	Calculated quantity	Means	moyennes GAPDH	/GAPDH	/siCtrl
siCtrl	22.3185	210217	208968	5.24154e+06	0.0398676	1
siCtrl	22.3357	207718
siZ2#	18.1877	3.68262e+06	3.61187e+06	1.69998e+07	0.212466	5.32928
iZ2#	18.2442	3.54112e+06
RRM2	Ct	Calculated quantity	Means	moyennes GAPDH	/GAPDH	/siCtrl
siCtrl	21.9327	274658	218079	5.24154e+06	0.0416058	1
siCtrl	22.6988	161499
siZ2#	22.411	197166	205083	1.69998e+07	0.0120639	0.289956
iZ2#	22.2995	213000
PLAT	Ct	Calculated quantity	Means	moyennes GAPDH	/GAPDH	/siCtrl
siCtrl	21.7738	306648	312254	5.24154e+06	0.0595729	1
siCtrl	21.722	317859
siZ2#	20.6005	691539	674600	1.69998e+07	0.0396829	0.666123
iZ2#	20.673	657662
GAPDH	Ct	Calculated quantity	Means	moyennes GAPDH
siCtrl	15.1651	2.99257e+07	3.10281e+07	5.24154e+06
siCtrl	15.0626	3.21305e+07
siZ2#	15.6721	2.1059e+07	2.17555e+07	1.69998e+07
iZ2#	15.5797	2.2452e+07
H2A.Z.1	Ct	Calculated quantity	Means	moyennes GAPDH	/GAPDH	/siCtrl
siCtrl	22.7968	150898	150730	5.24154e+06	0.0287568	1
siCtrl	22.8	150562
siZ2#	21.0041	522805	577386	1.69998e+07	0.0339643	1.18109
iZ2#	20.7305	631967
H2A.Z.2	Ct	Calculated quantity	Means	moyennes GAPDH	/GAPDH	/siCtrl
siCtrl	24.1129	60601.7	63165.8	5.24154e+06	0.012051	1
siCtrl	23.9957	65730
siZ2#	25.4576	23861	23138.3	1.69998e+07	0.00136109	0.112944
iZ2#	25.5478	22415.5

## Sheet: n3
Title: Source Data for the histogrammes representing the effect of a second siRNA H2A.Z.2 (siH2A.Z.2#) on Figure 2 - Figure supplement 2
ZDHHC20	Ct	Calculated quantity	Means	moyennes GAPDH	/GAPDH	/siCtrl
siCtrl	25.4513	23966.2	24233.3	1.0993e+07	0.00220442	1
siCtrl	25.4195	24500.4
siZ2#	22.1978	228555	224427	1.27194e+07	0.0176444	8.00411
iZ2#	22.2509	220299
COLEC12	Ct	Calculated quantity	Means	moyennes GAPDH	/GAPDH	/siCtrl
siCtrl	24.8614	36072.9	38239.4	1.0993e+07	0.00347851	1
siCTrl	24.6977	40405.9
siZ2#	22.7902	151583	150785	1.27194e+07	0.0118547	3.40797
iZ2#	22.8055	149986
AKAP12	Ct	Calculated quantity	Means	moyennes GAPDH	/GAPDH	/siCtrl
siCtrl	24.1374	59580.6	59696.4	1.0993e+07	0.00543039	1
siCtrl	24.1318	59812.2
siZ2#	24.0725	62325.1	53382.1	1.27194e+07	0.00419689	0.772853
iZ2#	24.5605	44439.2
ADAMTS1	Ct	Calculated quantity	Means	moyennes GAPDH	/GAPDH	/siCtrl
siCtrl	21.6126	342895	342958	1.0993e+07	0.0311978	1
siCtrl	21.6121	343022
siZ2#	18.5449	2.87499e+06	2.84757e+06	1.27194e+07	0.223875	7.176
iZ2#	18.5727	2.82014e+06
RRM2	Ct	Calculated quantity	Means	moyennes GAPDH	/GAPDH	/siCtrl
siCtrl	23.8688	71773.6	51102.1	1.0993e+07	0.00464859	1
siCtrl	25.1068	30430.7
siZ2#	26.5853	10919.9	10546.2	1.27194e+07	0.000829139	0.178364
iZ2#	26.6876	10172.5
PLAT	Ct	Calculated quantity	Means	moyennes GAPDH	/GAPDH	/siCtrl
siCtrl	22.0431	254437	212183	1.0993e+07	0.0193016	1
siCtrl	22.6254	169928
siZ2#	20.5186	731962	629832	1.27194e+07	0.0495173	2.56546
iZ2#	20.9906	527703
GAPDH	Ct	Calculated quantity	Means	moyennes GAPDH
siCtrl	16.5807	1.1218e+07	1.0993e+07	1.0993e+07
siCtrl	16.6397	1.07681e+07
siZ2#	16.3415	1.32406e+07	1.27194e+07	1.27194e+07
iZ2#	16.4598	1.21983e+07
H2A.Z.1	Ct	Calculated quantity	Means	moyennes GAPDH	/GAPDH	/siCtrl
siCtrl	22.487	187037	200653	1.0993e+07	0.0182527	1
siCtrl	22.2909	214269
siZ2#	22.0166	259146	294697	1.27194e+07	0.023169	1.26934
iZ2#	21.6668	330247
H2A.Z.2	Ct	Calculated quantity	Means	moyennes GAPDH	/GAPDH	/siCtrl
siCtrl	23.5844	87414.8	84403.4	1.0993e+07	0.0076779	1
siCtrl	23.6874	81392
siZ2#	25.8942	17631.1	17105.9	1.27194e+07	0.00134486	0.17516
iZ2#	25.9828	16580.6

## Sheet: Summary
Title: Source Data for the histogrammes representing the effect of a second siRNA H2A.Z.2 (siH2A.Z.2#) on Figure 2 - Figure supplement 2
	ZDHHC20
	N1	N2	N3	Mean	Error bars
siC	1	1	1	1	0
siZ2#	8.56508	3.59344	8.00411	6.72088	1.57208
	COLEC12
	N=1	N=2	N=3	Mean	Error bars
siC	1	1	1	1	0
siZ2#	3.35782	1.82067	3.40797	2.86215	0.520943
	AKAP12
	N=1	N=2		Mean	Error bars
siC	1	1	1	1	0
siZ2#	0.46103	0.170543	0.772853	0.468142	0.173908
	ADAMTS1
	N=1	N=2	N=3	Mean	Error bars
siC	1	1	1	1	0
siZ2#	9.7297	5.36399	7.176	7.42323	1.26632
	RRM2
	N=1	N=2	N=3	Mean	Error bars
siC	1	1	1	1	0
siZ2#	0.578172	0.291844	0.178364	0.34946	0.118956
	PLAT
	N=1	N=2	N=3	Mean	Error bars
siC	1	1	1	1	0
siZ2#	1.98076	0.670461	2.56546	1.73889	0.560246
	H2AZ1
	N=1	N=2	N=3	Mean	Error bars
siC	1	1	1	1	0
siZ2#	0.97522	1.18109	1.26934	1.14188	0.0871396
	H2AZ2
	N=1	N=2	N=3	Mean	Error bars
siC	1	1	1	1	0
siZ2#	0.159474	0.112944	0.435094	0.235838	0.10053
