# Supplementary material for: Integrated analysis of H2A.Z isoforms function reveals a complex interplay in gene regulation
Source: eLife. 2020 Feb 28;9:e53375. doi: 10.7554/eLife.53375 (PMC7048395; doi:10.7554/eLife.53375)
Supplement: Figure 2—figure supplement 3—source data 1. [file elife-53375-fig2-figsupp3-data1.xlsx]

## Sheet: N1
Title: Source data of the histogramme representing the depletion of H2A.Z.1 and H2A.Z.2 in response to siRNAs in U2OS cells
H2A.Z.1	Ct	Calculated quantity	Means	Means GAPDH	/GAPDH	/siCtrl
siCtrl	18.6028	2.76192e+06	2.74878e+06	5.66651e+07	0.0485091	1
siCtrl	18.6166	2.73563e+06
siZ1	22.5698	176609	159708	3.37392e+07	0.00473361	0.0975818
siZ1	22.8763	142808
siZ2	18.8913	2.26122e+06	2.36185e+06	4.82697e+07	0.0489303	1.00868
siZ2	18.7683	2.46249e+06
siZ1+2	23.516	91659.2	95081.2	3.41355e+07	0.0027854	0.0574202
siZ1+2	23.4121	98503.1
H2A.Z.2	Ct	Calculated quantity	Means	Means GAPDH	/GAPDH	/siCtrl
siCtrl	19.3418	1.65471e+06	1.50014e+06	5.66651e+07	0.0264738	1
siCtrl	19.6402	1.34557e+06
siZ1	19.9181	1.10982e+06	1.08972e+06	3.37392e+07	0.0322984	1.22001
siZ1	19.9713	1.06963e+06
siZ2	21.9349	274242	268794	4.82697e+07	0.00556859	0.210344
siZ2	21.9934	263347
siZ1+2	23.0103	130137	142032	3.41355e+07	0.00416083	0.157168
siZ1+2	22.7681	153927
GAPDH	Ct	Calculated quantity	Means GAPDH
siCtrl	14.1581	6.01428e+07	5.66651e+07
siCtrl	14.3354	5.31875e+07
siZ1	15.1023	3.12579e+07	3.37392e+07
siZ1	14.8897	3.62206e+07
siZ2	14.553	4.57419e+07	4.82697e+07
siZ2	14.4017	5.07975e+07
siZ1+2	15.7158	2.04309e+07	2.13347e+07
siZ1+2	15.5934	2.22386e+07

## Sheet: N2
Title: Source data of the histogramme representing the depletion of H2A.Z.1 and H2A.Z.2 in response to siRNAs in U2OS cells
H2A.Z.1	Ct	Calculated quantity	Means	Means GAPDH	/GAPDH	/siCtrl
siCtrl	18.7752	2.45084e+06	2.4864e+06	4.51473e+07	0.0550731	1
siCtrl	18.7339	2.52196e+06
siZ1	22.6454	167596	157050	3.03189e+07	0.00517993	0.0940555
siZ1	22.8394	146503
siZ2	18.6921	2.59612e+06	2.63009e+06	4.18632e+07	0.0628258	1.14077
siZ2	18.6548	2.66405e+06
siZ1+2	22.5081	184323	183353	4.1726e+07	0.00439422	0.0797889
siZ1+2	22.5234	182383
H2A.Z.2	Ct	Calculated quantity	Means	Means GAPDH	/GAPDH	/siCtrl
siCtrl	19.7023	1.28886e+06	1.21703e+06	4.51473e+07	0.0269568	1
siCtrl	19.8728	1.1452e+06
siZ1	20.5645	709017	771501	3.03189e+07	0.0254462	0.943963
siZ1	20.3303	833986
siZ2	22.1267	240108	240346	4.18632e+07	0.00574122	0.212978
siZ2	22.1238	240583
siZ1+2	21.9295	275264	265688	4.1726e+07	0.00636744	0.236209
siZ1+2	22.0336	256111
GAPDH	Ct	Calculated quantity	Means GAPDH
siCtrl	14.53	4.64766e+07	4.51473e+07
siCtrl	14.615	4.3818e+07
siZ1	15.1016	3.12719e+07	3.03189e+07
siZ1	15.1924	2.93658e+07
siZ2	14.7255	4.05879e+07	4.18632e+07
siZ2	14.6375	4.31385e+07
siZ1+2	14.6966	4.14065e+07	4.1726e+07
siZ1+2	14.6746	4.20455e+07

## Sheet: N3
Title: Source data of the histogramme representing the depletion of H2A.Z.1 and H2A.Z.2 in response to siRNAs in U2OS cells
H2A.Z.1	Ct	Calculated quantity	Means	Means GAPDH	/GAPDH	/siCtrl
siCtrl	18.9938	2.1062e+06	1.93963e+06	5.38729e+07	0.0360038	1
siCtrl	19.2422	1.77306e+06
siZ1	22.5167	183231	193814	4.72741e+07	0.0040998	0.113871
siZ1	22.359	204398
siZ2	18.627	2.71587e+06	2.7174e+06	5.50756e+07	0.0493394	1.37039
siZ2	18.6254	2.71893e+06
siZ1+2	22.3976	198997	197929	4.30296e+07	0.00459983	0.127759
siZ1+2	22.4132	196860
H2A.Z.2	Ct	Calculated quantity	Means	Means GAPDH	/GAPDH	/siCtrl
siCtrl	20.6327	676288	726170	5.38729e+07	0.0134793	1
siCtrl	20.4342	776051
siZ1	20.4166	785603	836468	4.72741e+07	0.017694	1.31268
siZ1	20.2409	887332
siZ2	22.3977	198989	215263	5.50756e+07	0.00390849	0.289962
siZ2	22.1791	231537
siZ1+2	22.6141	171273	164790	4.30296e+07	0.00382969	0.284116
siZ1+2	22.7276	158307
GAPDH	Ct	Calculated quantity	Means GAPDH
siCtrl	14.2148	5.78248e+07	5.38729e+07
siCtrl	14.4269	4.99209e+07
siZ1	14.292	5.4812e+07	4.72741e+07
siZ1	14.756	3.97362e+07
siZ2	14.2178	5.77046e+07	5.50756e+07
siZ2	14.3557	5.24466e+07
siZ1+2	14.5666	4.53128e+07	4.30296e+07
siZ1+2	14.7198	4.07464e+07

## Sheet: Summary
Title: Source data of the histogramme representing the depletion of H2A.Z.1 and H2A.Z.2 in response to siRNAs in U2OS cells in Figure 2- Figure supplement 3
H2AZ1
	N1	N2	N3	Mean	Error bars
siC	1	1	1	1	0
siZ1	0.0975818	0.0940555	0.113871	0.101836	0.00610304
siZ2	1.00868	1.14077	1.37039	1.17328	0.105675
siZ1+2	0.0574202	0.0797889	0.127759	0.0883229	0.0207487
H2AZ2
	N1	N2	N3	Mean	Error bars
siC	1	1	1	1	0
siZ1	1.22001	0.943963	1.31268	1.15888	0.11074
siZ2	0.210344	0.212978	0.289962	0.237761	0.0261115
siZ1+2	0.157168	0.236209	0.284116	0.225831	0.0370123
