# Supplementary material for: Integrated analysis of H2A.Z isoforms function reveals a complex interplay in gene regulation
Source: eLife. 2020 Feb 28;9:e53375. doi: 10.7554/eLife.53375 (PMC7048395; doi:10.7554/eLife.53375)
Supplement: Figure 4—source data 1. — Z isoforms on Figure 4A. [file elife-53375-fig4-data1.xlsx]

## Sheet: Analyse 2- pourcentage d'input
22-0-2-18	P21 DISTAL			2^(40-Ct)	Moyenne Input	% Input				22-0-2-18	GAPDH			2^(40-Ct)	Moyenne Input	% Input
INPUT	Flag Z1 siC		24.4736	47196.7	48859.4	10				INPUT	Flag Z1 siC		23.2269	111994	114990	10
			24.3754	50522.1									23.1517	117987
	FlagZ1 siZ2		23.9184	69347.9	67875	10					FlagZ1 siZ2		22.7361	157384	155776	10
			23.9811	66402.1									22.7659	154167
	Flag Z2 siC		23.7925	75674.9	73777.1	10					Flag Z2 siC		22.7299	158062	163661	10
			23.8667	71879.3									22.6311	169260
	Flag Z2 siZ1		24.1436	59327.6	56784	10					Flag Z2 siZ1		22.9203	138518	136571	10
			24.2729	54240.4									22.9614	134625
	Flag Z2 siZ2		23.7048	80416.8	68852	10					Flag Z2 siZ2		22.8239	148090	148813	10
			24.1941	57287.3									22.8099	149536
ChIP FLAG	Flag Z1 siC		24.5879	43602.9	42217.6	8.64062				ChIP FLAG	Flag Z1 siC		24.4316	48589.7	48664.9	4.23209
			24.6826	40832.2									24.4272	48740.1
	FlagZ1 siZ2		24.7131	39976.7	39424.5	5.80839					FlagZ1 siZ2		24.324	52354.2	52126.7	3.34626
			24.7535	38872.3									24.3366	51899.2
	Flag Z2 siC		25.1421	29694.3	28903.9	3.91774					Flag Z2 siC		24.7431	39154.6	39722	2.42709
			25.221	28113.6									24.7019	40289.4
	Flag Z2 siZ1		24.8677	35914.9	35073	6.17656					Flag Z2 siZ1		24.4472	48068.7	46996.7	3.44118
			24.937	34231.1									24.513	45924.7
	Flag Z2 siZ2		26.8133	9323.83	10244.9	1.48795					Flag Z2 siZ2		26.5712	11027.2	10954.8	0.736145	0.173944
			26.5532	11165.9									26.5903	10882.4
NO AB	Flag Z1 siC		34.9974	32.0575	38.5883	0.000789783	9.14035e-05			NO AB	Flag Z1 siC		34.8207	36.2337	37.5165	0.00326258	0.000770915
			34.5043	45.1192									34.722	38.7993
	FlagZ1 siZ2		34.8319	35.9535	38.8655	0.000572605	9.85823e-05				FlagZ1 siZ2		32.7149	155.969	204.641	0.0131369	0.00392584
			34.6153	41.7776									32.0152	253.313
	Flag Z2 siC		34.6926	39.5995	35.1239	0.000476081	0.000121519				Flag Z2 siC		32.978	129.962	150.774	0.00921255	0.00379572
			35.0623	30.6483									32.5772	171.585
	Flag Z2 siZ1		33.1841	112.663	76.0668	0.00133958	0.000216881				Flag Z2 siZ1		32.5131	179.382	236.049	0.0172839	0.00502267
			34.6973	39.4707									31.8066	292.716
	Flag Z2 siZ2		35.8957	17.1997	25.5084	0.000370482	0.000248988				Flag Z2 siZ2		32.7347	153.839	162.598	0.0109263	0.0148426
			34.9203	33.8172									32.5791	171.356
ChIP H2AZ avec 20 ug seuelemnt/ Fait sur Cellules Flag Z1 siZ2!! J'avais pas assez d'autres extraits
p21	30.8
p21	30.73
GAPDH	30.13
GAPDH	30.71

## Sheet: n1
Title: Source Data of the histogrammes representing ChIP expreriments in U2OS cells expressing tagged H2A.Z isoforms in Figure 4 A
GAPDH	Ct	2-40Ct	Mean	% Input
Flag Z1 siC	24.4316	48589.7	48664.9	4.23209
	24.4272	48740.1
Flag Z2 siZ1	24.7431	39154.6	39722	2.42709
	24.7019	40289.4
P21	Ct	2-40Ct	Moyenne	% Input
Flag Z1 siC	24.5879	43602.9	42217.6	8.64062
	24.6826	40832.2
Flag Z2 siZ1	25.1421	29694.3	28903.9	3.91774
	25.221	28113.6
GAPDH NO AB	Ct	2-40Ct	Mean	% Input
Flag Z1 siC	34.8207	36.2337	37.5165	0.00326258
	34.722	38.7993
Flag Z2 siZ1	32.978	129.962	150.774	0.00921255
	32.5772	171.585
p21 NO AB	Ct	2-40Ct	Mean	% Input
Flag Z1 siC	34.9974	32.0575	38.5883	0.000789783
	34.5043	45.1192
Flag Z2 siZ1	34.6926	39.5995	35.1239	0.000476081
	35.0623	30.6483

## Sheet: n2
Title: Source Data of the histogrammes representing ChIP expreriments in U2OS cells expressing tagged H2A.Z isoforms in Figure 4 A
GAPDH	Ct	2-40Ct	Mean	% Input
Flag Z1 siC	25.6253	21242.8	20840	3.13745
	25.6811	20437.1
Flag Z2 siZ1	25.8491	18190.6	18457.6	2.60183
	25.8073	18724.7
P21	Ct	2-40Ct	Mean	% Input
Flag Z1 siC	26.2236	14031.6	13429.6	3.85771
	26.353	12827.5
Flag Z2 siC	26.856	9051.76	8929.64	2.50563
	26.8955	8807.52
GAPDH NO AB	Ct	2-40Ct	Mean	% Input
Flag Z1 siC	32.7347	153.839	142.952	0.0215215
	32.9549	132.066
Flag Z2 siZ1	33.11	118.607	121.482	0.0137867
	33.0417	124.357
P21 NO AB	Ct	2-40Ct	Mean	% Input
Flag Z1 siC	35.3243	25.5575	29.8064	0.00856205
	34.9102	34.0553
Flag Z2 siC	33.2025	111.237	64.1812	0.0180091
	35.9019	17.1255

## Sheet: n3
Title: Source Data of the histogrammes representing ChIP expreriments in U2OS cells expressing tagged H2A.Z isoforms in Figure 4 A
GAPDH	Ct	2-40Ct	Mean	% Input
Flag Z1 siC	25.5962	21676.4	21246.4	2.45107
	25.6546	20816.4
Flag Z2 siZ1	26.5571	11135.6	10477.1	1.32056
	26.7387	9818.51
P21	Ct	2-40Ct	Mean	% Input
Flag Z1 siC	26.0706	15601.4	15602.4	4.87057
	26.0704	15603.4
Flag Z2 siZ1	26.6844	10195.4	10075.9	4
	26.7186	9956.44
GAPDH NO AB	Ct	2-40Ct	Mean	% Input
Flag Z1 siC	32.5648	173.071	144.032	0.016616
	33.1546	114.993
Flag Z2 siZ1	34.9503	33.1212	100.802	0.0127054
	32.6035	168.483
P21 NO AB	Ct	2-40Ct	Mean	% Input
Flag Z1 siC	32.5874	170.373	143.77	0.0448805
	33.1276	117.167
Flag Z2 siZ1	33.0561	123.115	215.509	0.0615408
	31.7337	307.904

## Sheet: Summary
Title: Source Data of the histogrammes representing ChIP expreriments in U2OS cells expressing tagged H2A.Z isoforms in Figure 4 A
GAPDH	N1	N2	N3	Mean	Error Bars
Flag Z1 siC	4.23209	3.13745	2.45107	3.27354	0.51862
Flag Z2 siC	2.42709	2.60183	1.32056	2.11649	0.401152
p21	N1	N2	N3	Mean	Error Bars
Flag Z1 siC	8.64062	3.85771	4.87057	5.78963	1.45517
Flag Z2 siC	3.91774	2.50563	2.87727	3.10022	0.422607
NO AB p21	N1	N2	N3	Mean	Error Bars
Flag Z1 siC	0.000789783	0.00856205	0.0448805	0.0180775	0.0135881
Flag Z2 siC	0.000476081	0.0180091	0.0615408	0.0266753	0.0181526
NO AB GAPDH	N1	N2	N3	Mean	Error Bars
Flag Z1 siC	0.00326258	0.0215215	0.016616	0.0138	0.00545571
Flag Z2 siC	0.00921255	0.0137867	0.0127054	0.0119015	0.00138026
