# Supplementary material for: Integrated analysis of H2A.Z isoforms function reveals a complex interplay in gene regulation
Source: eLife. 2020 Feb 28;9:e53375. doi: 10.7554/eLife.53375 (PMC7048395; doi:10.7554/eLife.53375)
Supplement: Figure 4—source data 2. [file elife-53375-fig4-data2.xlsx]

## Sheet: N1
Title: Source Data of ChIP showing the competition between the two isoforms on figure 4C and 4D
PS: In n1 the sample FlagZ1 siZ1 was not done
	P21 DISTAL			2^(40-Ct)	Mean Input	% Input					GAPDH			2^(40-Ct)	Moyenne Input	% Input
INPUT	Flag Z1 siC		24.4736	47196.7	48859.4	10				INPUT	Flag Z1 siC		23.2269	111994	114990	10
			24.3754	50522.1									23.1517	117987
	FlagZ1 siZ2		23.9184	69347.9	67875	10					FlagZ1 siZ2		22.7361	157384	155776	10
			23.9811	66402.1									22.7659	154167
	Flag Z2 siC		23.7925	75674.9	73777.1	10					Flag Z2 siC		22.7299	158062	163661	10
			23.8667	71879.3									22.6311	169260
	Flag Z2 siZ1		24.1436	59327.6	56784	10					Flag Z2 siZ1		22.9203	138518	136571	10
			24.2729	54240.4									22.9614	134625
	Flag Z2 siZ2		23.7048	80416.8	68852	10					Flag Z2 siZ2		22.8239	148090	148813	10
			24.1941	57287.3	Mean input	% Input	/siC						22.8099	149536	Mean input	% Input	/siC
ChIP FLAG	Flag Z1 siC		24.5879	43602.9	42217.6	8.64062	1			ChIP FLAG	Flag Z1 siC		24.4316	48589.7	48664.9	4.23209	1
			24.6826	40832.2									24.4272	48740.1
	FlagZ1 siZ2		24.7131	39976.7	39424.5	5.80839	0.67222				FlagZ1 siZ2		24.324	52354.2	52126.7	3.34626	0.790688
			24.7535	38872.3									24.3366	51899.2
	Flag Z2 siC		25.1421	29694.3	28903.9	3.91774	1				Flag Z2 siC		24.7431	39154.6	39722	2.42709	1
			25.221	28113.6									24.7019	40289.4
	Flag Z2 siZ1		24.8677	35914.9	35073	6.17656	1.57656				Flag Z2 siZ1		24.4472	48068.7	46996.7	3.44118	1.41782
			24.937	34231.1									24.513	45924.7
	Flag Z2 siZ2		26.8133	9323.83	10244.9	1.48795	0.379798				Flag Z2 siZ2		26.5712	11027.2	10954.8	0.736145	0.303304
			26.5532	11165.9	Mean input	% Input	/ChIP						26.5903	10882.4	Mean input	% Input	/ChIP
NO AB	Flag Z1 siC		34.9974	32.0575	38.5883	0.000789783	9.14035e-05			NO AB	Flag Z1 siC		34.8207	36.2337	37.5165	0.00326258	0.000770915
			34.5043	45.1192									34.722	38.7993
	FlagZ1 siZ2		34.8319	35.9535	38.8655	0.000572605	9.85823e-05				FlagZ1 siZ2		32.7149	155.969	204.641	0.0131369	0.00392584
			34.6153	41.7776									32.0152	253.313
	Flag Z2 siC		34.6926	39.5995	35.1239	0.000476081	0.000121519				Flag Z2 siC		32.978	129.962	150.774	0.00921255	0.00379572
			35.0623	30.6483									32.5772	171.585
	Flag Z2 siZ1		33.1841	112.663	76.0668	0.00133958	0.000216881				Flag Z2 siZ1		32.5131	179.382	236.049	0.0172839	0.00502267
			34.6973	39.4707									31.8066	292.716
	Flag Z2 siZ2		35.8957	17.1997	25.5084	0.000370482	0.000248988				Flag Z2 siZ2		32.7347	153.839	162.598	0.0109263	0.0148426
			34.9203	33.8172									32.5791	171.356

## Sheet: N2
Title: Source Data of ChIP showing the competition between the two isoforms on figure 4C and 4D																						GAPDH
	P21 DISTAL			2^(40-Ct)	Mean Input	% Input				2018-03-09	Ctrl+ Droso			2^(40-Ct)	Moyenne Input	% Input					INPUT	Flag Z1 siC		23.916	69465	66423.2	10
INPUT	Flag Z1 siC		24.8507	36339.7	34812.3	10				INPUT	Flag Z1 siC		32.6	168.897	168.928	10								24.0482	63381.4
			24.9774	33284.8									32.5995	168.96								FlagZ1 siZ1		23.6829	81646.4	78909.2	10
	FlagZ1 siZ1		25.5522	22347	23228.3	10					FlagZ1 siZ1		32.8194	145.072	168.112	10								23.783	76172
			25.4427	24109.6									32.4214	191.152								FlagZ1 siZ2		23.6069	86062.8	83727.2	10
	FlagZ1 siZ2		25.0343	31997.7	32319.8	10					FlagZ1 siZ2		32.57	172.446	172.684	10								23.6874	81391.6
			25.0056	32641.9									32.566	172.922								Flag Z2 siC		23.5764	87901.5	88115.5	10
	Flag Z2 siC		24.8277	36925.5	35638.2	10					Flag Z2 siC		32.5681	172.677	153.111	10								23.5694	88329.6
			24.9319	34351									32.9388	133.545								Flag Z2 siZ1		23.9675	67027.1	70941	10
	Flag Z2 siZ1		25.1921	28682.9	28284.8	10					Flag Z2 siZ1		32.1174	236	235.784	10								23.8082	74854.8
			25.2327	27886.7									32.12	235.568								Flag Z2 siZ2		23.7039	80466.9	79469.2	10
	Flag Z2 siZ2		24.982	33178.5	32233.1	10					Flag Z2 siZ2		32.4209	191.217	370.683	10								23.7401	78471.6
			25.0667	31287.6									30.8963	550.148
																						GAPDH			2^(40-Ct)	Mean Input	% Input	/Spike In	/siCtrl
	P21 DISTAL			2^(40-Ct)	Mean Input	% Input	/Spike In	/siC		2018-03-09	Ctrl+ Droso			2^(40-Ct)	Mean Input	% Input					ChIP Flag	Flag Z1 siC		25.6253	21242.8	20840	3.13745	0.115065	1
ChIP Flag	Flag Z1 siC		26.2236	14031.6	13429.6	3.85771	0.141481	1		ChIP Flag	Flag Z1 siC		31.1495	461.61	460.612	27.2667								25.6811	20437.1
			26.353	12827.5									31.1557	459.614								FlagZ1 siZ1		27.6276	5302.34	5304.17	0.672186	0.0242414	0.210675
	FlagZ1 siZ1		28.6891	2540.59	2527.22	1.08799	0.0392369	0.277331			FlagZ1 siZ1		30.8991	549.107	466.156	27.7288								27.6266	5305.99
			28.7043	2513.86									31.418	383.205								FlagZ1 siZ2		25.2795	26996.8	26035	3.1095	0.0985712	0.856654
	FlagZ1 siZ2		25.6646	20671.5	19993.8	6.18623	0.196104	1.38608			FlagZ1 siZ2		30.949	530.409	544.744	31.5457								25.3861	25073.2
			25.7625	19316.1									30.8731	559.078								Flag Z2 siC		26.5759	10991.5	10588.2	1.20163	0.0435278	1
	Flag Z2 siC		26.856	9051.76	8929.64	2.50563	0.090764	1			Flag Z2 siC		31.0833	483.264	422.679	27.606								26.6858	10185
			26.8955	8807.52									31.4998	362.093								Flag Z2 siZ1		25.8491	18190.6	18457.6	2.60183	0.173794	3.9927
	Flag Z2 siZ1		26.439	12085.2	12049.1	4.25992	0.284548	3.13504			Flag Z2 siZ1		32.2107	221.212	352.988	14.9708								25.8073	18724.7
			26.4477	12013									31.0789	484.763								Flag Z2 siZ2		28.6422	2624.46	2549.69	0.32084	0.0205877	0.472978
	Flag Z2 siZ2		29.2878	1677.64	1705.72	0.529185	0.0339568	0.374122			Flag Z2 siZ2		30.3242	817.898	577.675	15.5841								28.7268	2474.92
			29.2403	1733.81									31.6015	337.452
																						GAPDH			2^(40-Ct)	Mean Input	% Input	/ChIP
	P21 DISTAL			2^(40-Ct)	Mean Input	% Input	/ChIP			2018-03-09	Ctrl+ Droso										NO AB	Flag Z1 siC		32.7347	153.839	142.952	0.0215215	0.00685954
NO AB	Flag Z1 siC		35.3243	25.5575	29.8064	0.00856205	0.00221947			NO AB	Flag Z1 siC		30.8565											32.9549	132.066
			34.9102	34.0553									30.8587									FlagZ1 siZ1		34.9038	34.2067	107.566	0.0136316	0.0202795
	FlagZ1 siZ1		34.9418	33.3166	36.2515	0.0156066	0.0143444				FlagZ1 siZ1		31.7976											32.5007	180.925
			34.7077	39.1865									31.6672									FlagZ1 siZ2		35.8601	17.6291	29.6578	0.00354219	0.00113915
	FlagZ1 siZ2		35.2012	27.8342	18.191	0.00562844	0.000909833				FlagZ1 siZ2		31.434											34.6185	41.6864
			36.9044	8.54779									30.7857									Flag Z2 siC		33.11	118.607	121.482	0.0137867	0.0114733
	Flag Z2 siC		33.2025	111.237	64.1812	0.0180091	0.00718744				Flag Z2 siC		31.2527											33.0417	124.357
			35.9019	17.1255									31.2726									Flag Z2 siZ1		32	256	212.449	0.0299472	0.0115101
	Flag Z2 siZ1		35.8434	17.8343	20.0917	0.00710338	0.00166749				Flag Z2 siZ1		30.7797											32.6	168.897
			35.5178	22.3492									31.1258									Flag Z2 siZ2		33.3977	97.162	57.169	0.00719385	0.0224219
	Flag Z2 siZ2		35.4461	23.4892	67.0857	0.0208127	0.0393298				Flag Z2 siZ2		31.5558											35.8977	17.1759
			33.2097	110.682									31.695

## Sheet: N3
Title: Source Data of ChIP showing the competition between the two isoforms on figure 4C and 4D
	P21 DISTAL			2^(40-Ct)	Mean Input	% Input					Ctrl+ Droso			2^(40-Ct)	Moyenne Input	% Input			GAPDH			2^(40-Ct)	Moyenne Input	% Input
INPUT	Flag Z1 siC		24.9506	33909	32034	10				INPUT	Flag Z1 siC		32.9735	130.373	203.651	10		INPUT	Flag Z1 siC		23.5801	87674.7	86682.3	10
			25.1197	30158.9									31.8866	276.929							23.6132	85689.8
	FlagZ1 siZ1		24.9924	32942	32319.9	10					FlagZ1 siZ1		31.9691	261.544	242.793	10			FlagZ1 siZ1		23.6038	86246.1	85129.6	10
			25.0479	31697.7									32.1924	224.042							23.6417	84013.1
	FlagZ1 siZ2		25.5167	22903.2	22867	10					FlagZ1 siZ2		32.5282	177.514	177.404	10			FlagZ1 siZ2		23.9437	68144.6	65247.4	10
			25.5213	22830.9									32.53	177.294							24.0719	62350.1
	Flag Z2 siC		24.9242	34536.5	35019	10					Flag Z2 siC		31.93	268.727	268.577	10			Flag Z2 siC		23.735	78751.4	79338.2	10
			24.8844	35501.4									31.9316	268.427							23.7136	79925.1
	Flag Z2 siZ1		25.5935	21716.8	21329	10					Flag Z2 siZ1		32.1	238.856	239.199	10			Flag Z2 siZ1		24.1737	58103.2	57426.2	10
			25.646	20941.1									32.0959	239.541							24.2077	56749.3
	Flag Z2 siZ2		25.4016	24805.4	24354.5	10					Flag Z2 siZ2		33.0489	123.734	142.725	10			Flag Z2 siZ2		24.1345	59703.1	59009.8	10
			25.4551	23903.5									32.6627	161.716							24.1684	58316.5
	P21 DISTAL			2^(40-Ct)	Mean Input	% Input	/Spike In	/siC			Ctrl+ Droso			2^(40-Ct)	Mean Input	% Input			GAPDH			2^(40-Ct)	Mean Input	% Input	/Spike In	/siC
ChIP Flag	Flag Z1 siC		26.0706	15601.4	15602.4	4.87057	0.181827	1		ChIP Flag	Flag Z1 siC		30.7546	606.917	545.516	26.7868		ChIP Flag	Flag Z1 siC		25.5962	21676.4	21246.4	2.45107	0.0915027	1
			26.0704	15603.4									31.0808	484.115							25.6546	20816.4
	FlagZ1 siZ1		28.0785	3879.14	3429.7	1.06117	0.0432225	0.237712			FlagZ1 siZ1		30.8525	567.107	596.091	24.5514			FlagZ1 siZ1		26.9317	8588.89	8471.72	0.995156	0.0405335	0.442976
			28.4588	2980.27									30.7121	625.074							26.9717	8354.55
	FlagZ1 siZ2		25.6907	20300.9	20841.1	9.11402	0.234674	1.29064			FlagZ1 siZ2		30.7605	604.46	688.984	38.837			FlagZ1 siZ2		24.8078	37438.7	38444.2	5.89207	0.151713	1.65802
			25.6159	21381.2									30.4047	773.507							24.7323	39449.8
	Flag Z2 siC		26.6844	10195.4	10075.9	2.87727	0.119984	1			Flag Z2 siC		30.7145	624.047	644.06	23.9804			Flag Z2 siC		26.5571	11135.6	10477.1	1.32056	0.055068	1
			26.7186	9956.44									30.6248	664.073							26.7387	9818.51
	Flag Z2 siZ1		25.9336	17156	16982.6	7.96223	0.429538	3.57996			Flag Z2 siZ1		30.798	588.95	443.397	18.5368			Flag Z2 siZ1		25.2689	27196.6	25878.9	4.50646	0.243109	4.4147
			25.963	16809.2									31.7816	297.843							25.4159	24561.1
	Flag Z2 siZ2		28.9191	2166.16	1969.46	0.808665	0.0322707	0.268958			Flag Z2 siZ2		31.5465	350.55	357.652	25.0588			Flag Z2 siZ2		28.8365	2293.7	2367.29	0.401169	0.0160091	0.290715
			29.2082	1772.76									31.4892	364.755							28.7468	2440.88
	P21 DISTAL			2^(40-Ct)	Mean Input	% Input	/ChIP				Ctrl+ Droso			2^(40-Ct)	Mean Input	% Input			GAPDH			2^(40-Ct)	Mean Input	% Input	/ChIP
NO AB	Flag Z1 siC		32.5874	170.373	143.77	0.0448805	0.00921464			NO AB	Flag Z1 siC		32.8113	145.883	251.275	12.3385		NO AB	Flag Z1 siC		32.5648	173.071	144.032	0.016616	0.00677911
			33.1276	117.167									31.5216	356.668							33.1546	114.993
	FlagZ1 siZ1		32.12	235.569	206.345	0.0638447	0.0601642				FlagZ1 siZ1		30.6165	667.915	632.687	26.0587			FlagZ1 siZ1		32.5522	174.588	181.955	0.0213739	0.0214779
			32.5314	177.122									30.7773	597.46							32.4353	189.322
	FlagZ1 siZ2		31.8914	276.024	219.371	0.095933	0.0105259				FlagZ1 siZ2		31.3057	414.238	401.356	22.6238			FlagZ1 siZ2		32.1722	227.19	186.823	0.028633	0.00485958
			32.6538	162.717									31.3983	388.474							32.8057	146.456
	Flag Z2 siC		33.0561	123.115	215.509	0.0615408	0.0213886				Flag Z2 siC		31.2603	427.467	494.725	18.4202			Flag Z2 siC		34.9503	33.1212	100.802	0.0127054	0.00962122
			31.7337	307.904									30.8656	561.983							32.6035	168.483
	Flag Z2 siZ1		31.8784	278.507	214.298	0.100473	0.0126187				Flag Z2 siZ1		31.5203	356.987	423.486	17.7044			Flag Z2 siZ1		33.4055	96.636	109.514	0.0190704	0.00423181
			32.7703	150.089									31.0634	489.985							33.0646	122.393
	Flag Z2 siZ2		32.1636	228.553	253.848	0.10423	0.128892				Flag Z2 siZ2		32.1667	228.062	358.09	25.0895			Flag Z2 siZ2		34.7836	37.1785	94.7692	0.0160599	0.0400328
			31.8751	279.142									31.0689	488.118							32.7487	152.36

## Sheet: Summary
Title: Source Data of ChIP showing the competition between the two isoforms on figure 4C and 4D
P21		N3	N2	N1	Mean	Error Bars
ChIP Flag	Flag Z1 siC	1	1	1	1	0
	FlagZ1 siZ1	0.237712	0.277331	not done	0.257521	0.0198092
	FlagZ1 siZ2	1.29064	1.38608	0.67222	1.11631	0.22375
	Flag Z2 siC	1	1	1	1	0
	Flag Z2 siZ1	3.57951	3.13504	1.57656	2.7637	0.607279
	Flag Z2 siZ2	0.26	0.374122	0.379798	0.337973	0.0390211
																				²
GAPDH		N3	N2	N1	Mean
ChIP Flag	Flag Z1 siC	1	1	1	1	0
	FlagZ1 siZ1	0.442976	0.210675	not done	0.326826	0.116151
	FlagZ1 siZ2	1.65802	0.856654	0.791962	1.10221	0.278529
	Flag Z2 siC	1	1	1	1	0
	Flag Z2 siZ1	4.4147	3.9927	1.41564	3.27435	0.937305
	Flag Z2 siZ2	0.290715	0.472978	0.304527	0.356073	0.0585882
