# Supplementary material for: Integrated analysis of H2A.Z isoforms function reveals a complex interplay in gene regulation
Source: eLife. 2020 Feb 28;9:e53375. doi: 10.7554/eLife.53375 (PMC7048395; doi:10.7554/eLife.53375)
Supplement: Figure 6—figure supplement 3—source data 1. [file elife-53375-fig6-figsupp3-data1.xlsx]

## Sheet: N1
Title: Source Data of histogrammes in Figure 6 - Figure supplement 3A representing the efficiency of siRNA against SIRT1 and PHF14
SIRT1	Ct	Calculated quantity	Means	moyennes GAPDH	/GAPDH	/siCtrl
siCtrl	23.7627	77254.9	79084.5	3.9218e+07	0.00201654	1
siCtrl	23.6959	80914
siSIRT1	26.6557	10400.1	10384	4.12286e+07	0.000251864	0.124899
siSIRT1	26.6602	10367.9
siPHF14	24.1086	60782	64632.9	1.67897e+07	0.00384957	1.909
siPHF14	23.9365	68483.8
PHF14	Ct	Calculated quantity	Means	moyennes GAPDH	/GAPDH	/siCtrl
siCtrl	26.2777	13515.4	16113.8	3.9218e+07	0.000410879	1
siCtrl	25.8083	18712.3
siSIRT1	25.5878	21802.1	20747.8	4.12286e+07	0.000503237	1.22478
siSIRT1	25.7346	19693.5
siPHF14	29.7207	1242.76	1449.73	1.67897e+07	8.63463e-05	0.21015
siPHF14	29.3059	1656.69
GAPDH	Ct	Calculated quantity	Means
siCtrl	14.6301	4.33616e+07	3.9218e+07
siCtrl	14.9361	3.50744e+07
siSIRT1	14.7335	4.03616e+07	4.12286e+07
siSIRT1	14.6728	4.20957e+07
siPHF14	16.0506	1.61989e+07	1.67897e+07
siPHF14	15.949	1.73804e+07

## Sheet: N2
Title: Source Data of histogrammes in Figure 6 - Figure supplement 3A representing the efficiency of siRNA against SIRT1 and PHF14
SIRT1	Ct	Calculated quantity	Means	moyennes GAPDH	/GAPDH	/siCtrl
siCtrl	23.9775	66564.1	70508.7	3.13175e+07	0.00225142	1
siCtrl	23.816	74453.4
siSIRT1	26.1106	15174.9	12991.8	2.61253e+07	0.000497287	0.220877
siSIRT1	26.6001	10808.6
siPHF14	23.7241	79345.9	84051.4	2.23812e+07	0.00375545	1.66804
siPHF14	23.5624	88756.9
PHF14	Ct	Calculated quantity	Means	moyennes GAPDH	/GAPDH	/siCtrl
siCtrl	26.8	9410.14	9313.31	3.13175e+07	0.000297384	1
siCtrl	26.83	9216.48						N1
siSIRT1	26.896	8804.1	9423.13	2.61253e+07	0.00036069	1.21288
siSIRT1	26.7062	10042.2
siPHF14	29.5108	1437.35	1794.81	2.23812e+07	8.01929e-05	0.269662
siPHF14	28.9284	2152.27
GAPDH	Ct	Calculated quantity	Means
siCtrl	15.1231	3.08111e+07	3.13175e+07
siCtrl	15.0764	3.18239e+07
siSIRT1	15.3189	2.6899e+07	2.61253e+07
siSIRT1	15.4044	2.53515e+07
siPHF14	15.5849	2.23711e+07	2.23812e+07
siPHF14	15.5836	2.23913e+07

## Sheet: N3
Title: Source Data of histogrammes in Figure 6 - Figure supplement 3A representing the efficiency of siRNA against SIRT1 and PHF14
SIRT1	Ct	Calculated quantity	Means	moyennes GAPDH	/GAPDH	/siCtrl
siCtrl	23.8466	72890.2	65932.2	2.89883e+07	0.00227444	1
siCtrl	24.1522	58974.1
siSIRT1	26.4949	11625.9	12793.8	2.61645e+07	0.000488975	0.214987
siSIRT1	26.2308	13961.6
siPHF14	23.692	81133.6	81189.5	2.14456e+07	0.00378583	1.66451
siPHF14	23.69	81245.5
PHF14	Ct	Calculated quantity	Means	moyennes GAPDH	/GAPDH	/siCtrl
siCtrl	27.0499	7913.66	8244.99	2.89883e+07	0.000284425	1
siCtrl	26.9339	8576.32
siSIRT1	26.7785	9551.33	10004.3	2.61645e+07	0.000382363	1.34434
siSIRT1	26.6478	10457.3
siPHF14	29.0991	1912.01	1946.24	2.14456e+07	9.07523e-05	0.319073
siPHF14	29.0484	1980.47
GAPDH	Ct	Calculated quantity	Means
siCtrl	15.2466	2.82829e+07	2.89883e+07
siCtrl	15.1763	2.96937e+07
siSIRT1	15.5961	2.21976e+07	2.61645e+07
siSIRT1	15.1552	3.01313e+07
siPHF14	15.6106	2.19754e+07	2.14456e+07
siPHF14	15.6819	2.09158e+07

## Sheet: Summary
Title: Source Data of histogrammes in Figure 6 - Figure supplement 3A representing the efficiency of siRNA against SIRT1 and PHF14
	SIRT1
	N=1	N=2	N=3	mean	error bars
siC	1	1	1	1	0
siSIRT1	0.124899	0.220877	0.214987	0.186921	0.0310575
siPHF14	1.909	1.66804	1.66451	1.74718	0.0809151
	PHF14
	N=1	N=2	N=3	mean	error bars
siC	1	1	1	1	0
siSIRT1	1.22478	1.26237	1.34434	1.27716	0.0352969
siPHF14	0.21015	0.280664	0.319073	0.269963	0.0318953
