# Supplementary material for: Integrated analysis of H2A.Z isoforms function reveals a complex interplay in gene regulation
Source: eLife. 2020 Feb 28;9:e53375. doi: 10.7554/eLife.53375 (PMC7048395; doi:10.7554/eLife.53375)
Supplement: Figure 6—figure supplement 3—source data 2. [file elife-53375-fig6-figsupp3-data2.xlsx]

## Sheet: N1
Title: Source Data of histogramms in Figure 6 - Figure supplement 3B representing the effect of siSIRT1 and siPHF14 on H2A.Z.1 and H2A.Z.2 mRNAs
H2AZ1		Ct	Calculated quantity	Mean	Mean GAPDH	Mean/GAPDH	/siC
A01	siC	18.9861	2.11751e+06	2.15586e+06	2.57642e+07	0.0836768	1
A02	siC	18.9347	2.19422e+06
A09	siSIRT1	19.6348	1.35062e+06	1.42425e+06	2.21979e+07	0.0641612	0.766774
A10	siSIRT1	19.4855	1.49787e+06				,
A11	siPHF14	19.941	1.09237e+06	1.11244e+06	1.9956e+07	0.0557446	0.66619
A12	siPHF14	19.8889	1.1325e+06
H2AZ2		Ct	Calculated quantity	Mean	Mean GAPDH	Mean/GAPDH	/siC
C01	siC	21.2847	430404	445178	2.57642e+07	0.0172789	1
C02	siC	21.1889	459951
C09	siSIRT1	21.9023	280506	289911	2.21979e+07	0.0130603	0.755848
C10	siSIRT1	21.8087	299315				,
C11	siPHF14	22.062	251115	256302	1.9956e+07	0.0128434	0.743295
C12	siPHF14	22.0036	261488
GAPDH		Ct	Calculated quantity	Mean
G01	siC	15.4637	2.43312e+07	2.57642e+07
G02	siC	15.303	2.71971e+07
G09	siSIRT1	15.6134	2.19326e+07	2.21979e+07
G10	siSIRT1	15.5789	2.24633e+07
G11	siPHF14	15.9015	1.79631e+07	1.9956e+07
G12	siPHF14	15.6124	2.19489e+07

## Sheet: N2
Title: Source Data of histogramms in Figure 6 - Figure supplement 3B representing the effect of siSIRT1 and siPHF14 on H2A.Z.1 and H2A.Z.2 mRNAs
H2AZ1		Ct	Calculated quantity	Mean	Mean GAPDH	Mean/GAPDH	/siC
A01	siC	20.0004	1.0483e+06	959918	2.68272e+07	0.0357815	1
A02	siC	20.2668	871540
A09	siSIRT1	20.3036	849586	837938	2.64966e+07	0.0316243	0.883818
A10	siSIRT1	20.3437	826290				,
A11	siPHF14	20.6847	652338	525525	1.91134e+07	0.0274951	0.768417
A12	siPHF14	21.395	398713
H2AZ2		Ct	Calculated quantity	Mean	Mean GAPDH	Mean/GAPDH	/siC
C01	siC	21.6035	345055	313435	2.68272e+07	0.0116834	1
C02	siC	21.8956	281814
C09	siSIRT1	21.8028	300531	302150	2.64966e+07	0.0114033	0.976026
C10	siSIRT1	21.7874	303770				,
C11	siPHF14	22.3165	210505	210900	1.91134e+07	0.0110342	0.944427
C12	siPHF14	22.3111	211296
GAPDH		Ct	Calculated quantity	Mean
G01	siC	15.2454	2.83061e+07	2.68272e+07
G02	siC	15.4046	2.53484e+07
G09	siSIRT1	15.2702	2.7823e+07	2.64966e+07
G10	siSIRT1	15.4148	2.51703e+07
H01	siPHF14	15.7702	1.96747e+07	1.91134e+07
H02	siPHF14	15.8549	1.85521e+07

## Sheet: N3
Title: Source Data of histogramms in Figure 6 - Figure supplement 3B representing the effect of siSIRT1 and siPHF14 on H2A.Z.1 and H2A.Z.2 mRNAs
H2AZ1	z	Ct	Calculated quantity	Mean	Mean GAPDH	Mean/GAPDH	/siC
A01	siC	20.8025	601209	579001	2.13021e+07	0.0271805	1
A02	siC	20.9132	556793
A09	siSIRT1	20.8725	572732	594192	2.07336e+07	0.0286584	1.05437
A10	siSIRT1	20.7682	615652				,
A11	siPHF14	21.0216	516485	488997	1.61297e+07	0.0303165	1.11538
A12	siPHF14	21.184	461509
H2AZ2	z	Ct	Calculated quantity	Mean	Mean GAPDH	Mean/GAPDH	/siC
C01	siC	22.1506	236153	230314	2.13021e+07	0.0108118	1
C02	siC	22.2238	224475
C09	siSIRT1	22.0407	254857	231412	2.07336e+07	0.0111612	1.03232
C10	siSIRT1	22.334	207967				,
C11	siPHF14	22.3658	203439	229125	1.61297e+07	0.0142051	1.31385
C12	siPHF14	22.0409	254810
GAPDH		Ct	Calculated quantity	Mean
G01	siC	15.6693	2.10991e+07	2.13021e+07
G02	siC	15.6418	2.1505e+07
G09	siSIRT1	15.7	2.0655e+07	2.07336e+07
G10	siSIRT1	15.6891	2.08121e+07
G11	siPHF14	15.9448	1.74311e+07	1.61297e+07
G12	siPHF14	16.1781	1.48284e+07

## Sheet: Summary
Title: Source Data of histogramms in Figure 6 - Figure supplement 3B representing the effect of siSIRT1 and siPHF14 on H2A.Z.1 and H2A.Z.2 mRNAs
H2AZ1	N=1	N=2	N=3	Means	error bars
siC	1	1	1	1	0
siSIRT1	0.766774	0.883818	1.05437	0.901655	0.0835004
siPHF14	0.66619	0.768417	1.11538	0.849994	0.135933
H2AZ2	N=1	N=2	N=3	Means	error bars
siC	1	1	1	1	0
siSIRT1	0.755848	0.976026	1.03232	0.921397	0.0843546
siPHF14	0.743295	0.944427	1.31385	1.00052	0.167076
