# Supplementary material for: Integrated analysis of H2A.Z isoforms function reveals a complex interplay in gene regulation
Source: eLife. 2020 Feb 28;9:e53375. doi: 10.7554/eLife.53375 (PMC7048395; doi:10.7554/eLife.53375)
Supplement: Figure 6—source data 1. [file elife-53375-fig6-data1.xlsx]

## Sheet:  N=1
Title: Source Data of the histogrammes on Figure 6C representing the validation by RT-qPCR of the RNA-seq after siSIRT1 and siPHF14
ZDHHC20		Ct	2^(40-Ct)	Mean	Mean GAPDH	Mean/GAPDH	/siC
A01	siC	22.6383	168424	165542	3.9218e+07	0.00422108	1
A02	siC	22.6885	162660
A03	siSIRT1	20.6316	676828	711320	4.12286e+07	0.0172531	4.08736
A04	siSIRT1	20.4915	745813
A05	siPHF14	22.5592	177909	171334	1.67897e+07	0.0102047	2.41756
A06	siPHF14	22.67	164758
COLEC12		Ct	2^(40-Ct)	Mean	Mean GAPDH	Mean/GAPDH	/siC
C01	siC	22.1576	235020	237740	3.9218e+07	0.00606201	1
C02	siC	22.1246	240459
C03	siSIRT1	22.6883	162685	146658	4.12286e+07	0.00355718	0.586798
C04	siSIRT1	23.0049	130630
C05	siPHF14	23.6378	84240	88110.6	1.67897e+07	0.00524791	0.865705
C06	siPHF14	23.5109	91981.2
AKAP12		Ct	2^(40-Ct)	Mean	Mean GAPDH	Mean/GAPDH	/siC
D01	siC	22.5447	179712	202030	3.9218e+07	0.00515146	1
D02	siC	22.2246	224347
D03	siSIRT1	23.2512	110127	113346	4.12286e+07	0.00274922	0.533678
D04	siSIRT1	23.1692	116566
D05	siPHF14	22.9664	134164	134217	1.67897e+07	0.00799404	1.5518
D06	siPHF14	22.9652	134271
ADAM-TS1		Ct	2^(40-Ct)	Mean	Mean GAPDH	Mean/GAPDH	/siC
E01	siC	20.083	989934	1.03863e+06	3.9218e+07	0.0264835	1
E02	siC	19.9476	1.08733e+06
E03	siSIRT1	19.8138	1.193e+06	1.24809e+06	4.12286e+07	0.0302723	1.14306
E04	siSIRT1	19.6864	1.30317e+06
E05	siPHF14	20.6995	645695	651589	1.67897e+07	0.038809	1.4654
E06	siPHF14	20.6734	657484
RRM2		Ct	2^(40-Ct)	Mean	Mean GAPDH	Mean/GAPDH	/siC
F01	siC	20.4339	776237	642768	3.9218e+07	0.0163896	1
F02	siC	21.0418	509299
F03	siSIRT1	20.8426	584717	584949	4.12286e+07	0.0141879	0.865665
F04	siSIRT1	20.8415	585181
F05	siPHF14	23.1792	115760	119820	1.67897e+07	0.00713655	0.435431
F06	siPHF14	23.0814	123881
PLAT		Ct	2^(40-Ct)	Mean	Mean GAPDH	Mean/GAPDH	/siC
F01	siC	20.3721	810185	816913	3.9218e+07	0.0208301	1
F02	siC	20.3483	823641
F03	siSIRT1	21.1138	484530	466218	4.12286e+07	0.0113081	0.542874
F04	siSIRT1	21.2272	447906
F05	siPHF14	18.542	2.88071e+06	2.89038e+06	1.67897e+07	0.172153	8.26463
F06	siPHF14	18.5324	2.90005e+06
GAPDH		Ct	2^(40-Ct)	Mean	Mean GAPDH	Mean/GAPDH	/siC
G01	siC	14.6301	4.33616e+07	3.9218e+07
G02	siC	14.9361	3.50744e+07
G03	siSIRT1	14.7335	4.03616e+07	4.12286e+07
G04	siSIRT1	14.6728	4.20957e+07
G05	siPHF14	16.0506	1.61989e+07	1.67897e+07
G06	siPHF14	15.949	1.73804e+07

## Sheet: N=2
Title: Source Data of the histogrammes on Figure 6C representing the validation by RT-qPCR of the RNA-seq after siSIRT1 and siPHF14
ZDHHC20		Ct	2^(40-Ct)	Mean	Mean GAPDH	Mean/GAPDH	/siC
A01	siC	22.788	151816	142300	3.13175e+07	0.00454377	1
A02	siC	22.9813	132783
A03	siSIRT1	21.0389	510336	518563	2.61253e+07	0.0198491	4.36842
A04	siSIRT1	20.9931	526791
A05	siPHF14	22.2399	221981	233422	2.23812e+07	0.0104294	2.29531
A06	siPHF14	22.0984	244863
COLEC12			2^(40-Ct)	Mean	Mean GAPDH	Mean/GAPDH	/siC
C01	siC	23.3743	101122	94556.3	3.13175e+07	0.00301928	1
C02	siC	23.5749	87990.2
C03	siSIRT1	23.8533	72552.5	79558.2	2.61253e+07	0.00304526	1.00861
C04	siSIRT1	23.5985	86564
C05	siPHF14	24.0632	62726.9	63710.7	2.23812e+07	0.00284662	0.942813
C06	siPHF14	24.0186	64694.4
AKAP12			2^(40-Ct)	Mean	Mean GAPDH	Mean/GAPDH	/siC
D01	siC	22.0569	252005	269505	3.13175e+07	0.00860556	1
D02	siC	21.8693	287005
D03	siSIRT1	22.9002	140462	145142	2.61253e+07	0.00555562	0.645584
D04	siSIRT1	22.8071	149822
D05	siPHF14	22.0421	254607	248642	2.23812e+07	0.0111094	1.29096
D06	siPHF14	22.1113	242678
ADAM-TS1			2^(40-Ct)	Mean	Mean GAPDH	Mean/GAPDH	/siC
E01	siC	20.1831	923605	929206	3.13175e+07	0.0296705	1
E02	siC	20.1657	934808
E03	siSIRT1	19.9406	1.09268e+06	1.03681e+06	2.61253e+07	0.039686	1.33756
E04	siSIRT1	20.0962	980931
E05	siPHF14	20.4385	773740	780782	2.23812e+07	0.0348856	1.17577
E06	siPHF14	20.4125	787824
RRM2			2^(40-Ct)	Mean	Mean GAPDH	Mean/GAPDH	/siC
F01	siC	21.1753	464306	506018	3.13175e+07	0.0161577	1
F02	siC	20.9369	547731
F03	siSIRT1	21.8859	283715	294468	2.61253e+07	0.0112714	0.697587
F04	siSIRT1	21.7805	305221
F05	siPHF14	21.9255	276046	266687	2.23812e+07	0.0119157	0.737462
F06	siPHF14	22.0267	257329
PLAT			2^(40-Ct)	Mean	Mean GAPDH	Mean/GAPDH	/siC
F01	siC	20.42	783732	784021	3.13175e+07	0.0250346	1
F02	siC	20.4189	784310
F03	siSIRT1	21.5847	349581	369100	2.61253e+07	0.0141281	0.564342
F04	siSIRT1	21.432	388618
F05	siPHF14	19.3407	1.65607e+06	1.62277e+06	2.23812e+07	0.072506	2.89623
F06	siPHF14	19.3999	1.58947e+06
GAPDH			2^(40-Ct)	Mean
G01	siC	15.1231	3.08111e+07	3.13175e+07
G02	siC	15.0764	3.18239e+07
G03	siSIRT1	15.3189	2.6899e+07	2.61253e+07
G04	siSIRT1	15.4044	2.53515e+07
G05	siPHF14	15.5849	2.23711e+07	2.23812e+07
G06	siPHF14	15.5836	2.23913e+07
HEO et RT-
H2O PLAT	28.7466
H2O PLAT	28.6067
H2O COLEC12	38.2032
H2O COLEC12
H2O ADAMTS1	37.7181
H2O ADAMTS1	37.7158
H2O RRM2	28.9285
H2O RRM2	28.5082
RT- PLAT	29.3158
RT- PLAT	28.9849
RT-COLEC12	37.9093
RT- COLEC12	35.418
RT- ADAMTS1	35.9038
RT- ADAMTS1
Rt-RRM2	28.9639
Rt- RRM2	26.3317
H2O SIRT1	33.9462
H2O SIRT1	37.6326
H2O PHF
H2O PHF
H2O ZDHHC20	31.2588
H2O ZDHHC20	32.2897
H2O TXNIP
H2O TXNIP
H2O AKAP12
H2O AKAP12
H2O GAPDH	36.0747
H2O GAPDH	36.5026
Rt- SIRT1
RT-SIRT1	34.7355
Rt-PHF
rt- PHF
rt- ZDHHC20	32.5513
rt-ZDHHC20	31.5896
rt- TXNIP
rt-TXNIP
rt- AKAP12	33.0908
rt-AKAP12
rt-GAPDH	32.7142
rt-GAPDH	31.2742
rt- GAPDH

## Sheet: N=3
Title: Source Data of the histogrammes on Figure 6C representing the validation by RT-qPCR of the RNA-seq after siSIRT1 and siPHF14
ZDHHC20		Ct	2^(40-Ct)	Mean	Mean GAPDH	Mean/GAPDH	/siC
A01	siC	23.3019	106323	115317	2.89883e+07	0.00397804	1
A02	siC	23.0764	124311
A03	siSIRT1	20.9329	549259	534668	2.61645e+07	0.0204349	5.13693
A04	siSIRT1	21.0116	520077
A05	siPHF14	22.2458	221084	223252	2.14456e+07	0.0104101	2.61691
A06	siPHF14	22.2177	225420
COLEC12		Ct	2^(40-Ct)	Mean	Mean GAPDH	Mean/GAPDH	/siC
C01	siC	23.4215	97865.2	92534.6	2.89883e+07	0.00319214	1
C02	siC	23.5879	87204
C03	siSIRT1	23.7592	77442.4	84685	2.61645e+07	0.00323664	1.01394
C04	siSIRT1	23.5118	91927.6
C05	siPHF14	23.8747	71482.4	67194	2.14456e+07	0.00313323	0.981545
C06	siPHF14	24.0591	62905.6
AKAP12		Ct	2^(40-Ct)	Mean	Mean GAPDH	Mean/GAPDH	/siC
D01	siC	21.9342	274374	278206	2.89883e+07	0.00959719	1
D02	siC	21.8945	282039
D03	siSIRT1	22.6296	169437	167304	2.61645e+07	0.00639431	0.66627
D04	siSIRT1	22.6664	165170
D05	siPHF14	22.0998	244617	247944	2.14456e+07	0.0115615	1.20468
D06	siPHF14	22.0611	251272
ADAM-TS1		Ct	2^(40-Ct)	Mean	Mean GAPDH	Mean/GAPDH	/siC
E01	siC	20.0708	998340	1.00198e+06	2.89883e+07	0.0345651	1
E02	siC	20.0603	1.00563e+06
E03	siSIRT1	19.8131	1.19365e+06	1.20666e+06	2.61645e+07	0.0461183	1.33425
E04	siSIRT1	19.7819	1.21968e+06
E05	siPHF14	20.5505	715940	709097	2.14456e+07	0.0330649	0.956599
E06	siPHF14	20.5784	702255
RRM2		Ct	2^(40-Ct)	Mean	Mean GAPDH	Mean/GAPDH	/siC
F01	siC	20.9237	552761	576977	2.89883e+07	0.0199038	1
F02	siC	20.8025	601193
F03	siSIRT1	20.9139	556523	514341	2.61645e+07	0.019658	0.987652
F04	siSIRT1	21.1511	472159
F05	siPHF14	22.1864	230375	239456	2.14456e+07	0.0111657	0.560986
F06	siPHF14	22.0769	248538
PLAT		Ct	2^(40-Ct)	Mean	Mean GAPDH	Mean/GAPDH	/siC
F01	siC	20.5832	699910	681442	2.89883e+07	0.0235075	1
F02	siC	20.6614	662974
F03	siSIRT1	21.5321	362581	421142	2.61645e+07	0.016096	0.684716
F04	siSIRT1	21.1282	479703
F05	siPHF14	19.6921	1.29807e+06	1.30055e+06	2.14456e+07	0.0606441	2.57978
F06	siPHF14	19.6866	1.30303e+06
GAPDH		Ct	2^(40-Ct)	Mean
G01	siC	15.2466	2.82829e+07	2.89883e+07
G02	siC	15.1763	2.96937e+07
G03	siSIRT1	15.5961	2.21976e+07	2.61645e+07
G04	siSIRT1	15.1552	3.01313e+07
G05	siPHF14	15.6106	2.19754e+07	2.14456e+07
G06	siPHF14	15.6819	2.09158e+07

## Sheet: Summary
Title: Source Data of the histogrammes on Figure 6C representing the validation by RT-qPCR of the RNA-seq after siSIRT1 and siPHF14
		ZDHHC20
		N=1	N=2	N=3	Mean	Error Bars
	siC	1	1	1	1	0
	siSIRT1	4.08736	4.36842	5.13693	4.5309	0.313688
	siPHF14	2.41756	2.29531	2.61691	2.44326	0.0937206
		COLEC12
		N=1	N=2	N=3	Mean	Error Bars
	siC	1	1	1	1	0
	siSIRT1	0.586798	1.00861	1.01394	0.869782	0.1415
	siPHF14	0.865705	0.942813	0.981545	0.930021	0.0340465
		AKAP12
		N=1	N=2	N=3	Mean	Error Bars
	siC	1	1	1	1	0
	siSIRT1	0.533678	0.645584	0.66627	0.615177	0.041185
	siPHF14	1.5518	1.29096	1.20468	1.34915	0.104344
		ADAMTS1
		N=1	N=2	N=3	Mean	Error Bars
	siC	1	1	1	1	0
	siSIRT1	1.14306	1.33756	1.33425	1.27162	0.0642866
	siPHF14	1.4654	1.17577	0.956599	1.19926	0.147348
		RRM2
		N=1	N=2	N=3	Mean	Error Bars
	siC	1	1	1	1	0
	siSIRT1	0.865665	0.697587	0.987652	0.850301	0.0840862
	siPHF14	0.435431	0.737462	0.560986	0.57796	0.0876009
		PLAT
		N=1	N=2	N=3	Mean	Error Bars
	siC	1	1	1	1	0
	siSIRT1	0.542874	0.564342	0.684716	0.597311	0.0441399
	siPHF14	8.26463	2.89623	2.57978	4.58021	1.84447
