# Supplementary material for: Integrated analysis of H2A.Z isoforms function reveals a complex interplay in gene regulation
Source: eLife. 2020 Feb 28;9:e53375. doi: 10.7554/eLife.53375 (PMC7048395; doi:10.7554/eLife.53375)
Supplement: Figure 7—figure supplement 1—source data 1. [file elife-53375-fig7-figsupp1-data1.xlsx]

## Sheet: N=1
Title: Source Data of histogrammes on figure 7A and on figure 7-Figure suppement 1B showing that the antagonism between H2A.Z.1 and H2A.Z.2 is mediated by SIRT1 and PHF14
PLAT		Ct	Calculated quantity	Mean	Mean GAPDH	/GAPDH	/siC
A01	siC	20.66	663621	663094	2.57642e+07	0.0257371	1
A02	siC	20.6623	662567
A03	siZ1	19.3494	1.64609e+06	1.54959e+06	1.70533e+07	0.0908672	3.5306
A04	siZ1	19.5293	1.45309e+06
A05	siZ2	20.6271	678940	703297	3.74298e+07	0.0187898	0.730067
A06	siZ2	20.5271	727655
A07	siZ1+2	20.3954	797202	808236	2.14155e+07	0.0377407	1.46639
A08	Z1+2	20.356	819269
A09	siSIRT1	21.4355	387667	440278	2.21979e+07	0.0198342	0.770646
A10	siSIRT1	21.0891	492888				,
A11	siPHF14	20.188	920484	1.13384e+06	1.9956e+07	0.0568171	2.2076
A12	siPHF14	19.6385	1.3472e+06
B01	si SIRT1+siPHF14	21.1146	484260	571942	1.88362e+07	0.030364	1.17978
B02	SIRT1+PHF14	20.6687	659625
B03	siSIRT1 + Z1	21.0308	513217	604570	2.46864e+07	0.02449	0.951546
B04	siSIRT1 + Z1	20.5914	695924
B05	siPHF14+Z2	19.9074	1.1181e+06	1.1566e+06	2.89622e+07	0.0399348	1.55165
B06	siPHF14+Z2	19.8113	1.1951e+06
COLEC12		Ct	Calculated quantity	Mean	Mean GAPDH	/GAPDH	/siC
E01	siC	23.558	89032.6	89846.4	2.57642e+07	0.00348726	1
E02	siC	23.5318	90660.2
E03	siZ1	23.7982	75377.3	77198.2	1.70533e+07	0.00452688	1.29812
E04	siZ1	23.7301	79019.2
E05	siZ2	21.3029	425005	422145	3.74298e+07	0.0112783	3.23414
E06	siZ2	21.3224	419285
E07	Z1+2	22.7466	156238	152990	2.14155e+07	0.00714391	2.04857
E08	Z1+2	22.8079	149743
E09	siSIRT1	23.5976	86621.3	86824.5	2.21979e+07	0.00391138	1.12162
E10	siSIRT1	23.5908	87027.7				,
E11	siPHF14	23.9178	69376.4	63833.1	1.9956e+07	0.0031987	0.917251
E12	siPHF14	24.169	58289.8
F01	SIRT1+PHF14	23.7943	75579.6	81778.2	1.88362e+07	0.00434155	1.24497
F02	SIRT1+PHF14	23.5752	87976.9
F03	siSIRT1 + Z1	23.6408	84065.6	83917.9	2.46864e+07	0.00339936	0.974791
F04	siSIRT1 + Z1	23.6459	83770.2
F05	siPHF14+Z2	22.7945	151137	158104	2.89622e+07	0.00545898	1.5654
F06	siPHF14+Z2	22.6673	165071
AKAP12		Ct	Calculated quantity	Mean	Mean GAPDH	/GAPDH	/siC
A01	siC	22.0339	256057	269198	2.57642e+07	0.0104485	1
A02	siC	21.8929	282339
A03	siZ1	21.959	269707	254645	1.70533e+07	0.0149323	1.42912
A04	siZ1	22.1298	239583
A05	siZ2	22.2093	226749	225500	3.74298e+07	0.0060246	0.576597
A06	siZ2	22.2252	224250
A07	siZ1+2	21.6045	344824	342349	2.14155e+07	0.015986	1.52998
A08	Z1+2	21.6254	339874
A09	siSIRT1	23.2771	108167	108299	2.21979e+07	0.0048788	0.466936
A10	siSIRT1	23.2736	108431				,
A11	siPHF14	22.3732	202395	207199	1.9956e+07	0.0103828	0.993709
A12	siPHF14	22.3063	212003
B01	si SIRT1+siPHF14	22.5521	178787	201933	1.88362e+07	0.0107205	1.02603
B02	SIRT1+PHF14	22.2199	225079
B03	siSIRT1 + Z1	22.4097	197330	207341	2.46864e+07	0.00839901	0.803845
B04	siSIRT1 + Z1	22.2703	217353
B05	siPHF14+Z2	21.9631	268932	280747	2.89622e+07	0.00969357	0.927744
B06	siPHF14+Z2	21.8416	292562
ADAMTS1		Ct	Calculated quantity	Mean	Mean GAPDH	/GAPDH	/siC
A01	siC	20.6476	669359	691908	2.57642e+07	0.0268554	1
A02	siC	20.5535	714456
A03	siZ1	21.933	274600	276307	1.70533e+07	0.0162026	0.603325
A04	siZ1	21.9152	278015
A05	siZ2	18.7582	2.47973e+06	2.53081e+06	3.74298e+07	0.0676148	2.51773
A06	siZ2	18.7	2.58188e+06
A07	siZ1+2	20.8033	600875	605186	2.14155e+07	0.0282592	1.05227
A08	Z1+2	20.7827	609497
A09	siSIRT1	20.1007	977890	958912	2.21979e+07	0.0431983	1.60855
A10	siSIRT1	20.1578	939933				,
A11	siPHF14	20.6441	670961	694493	1.9956e+07	0.0348013	1.29587
A12	siPHF14	20.5463	718025
B01	si SIRT1+siPHF14	21.2566	438865	578607	1.88362e+07	0.0307179	1.14382
B02	SIRT1+PHF14	20.5457	718349
B03	siSIRT1 + Z1	20.6053	689244	701000	2.46864e+07	0.0283962	1.05737
B04	siSIRT1 + Z1	20.557	712756
B05	siPHF14+Z2	20.0341	1.02407e+06	1.0574e+06	2.89622e+07	0.0365098	1.35949
B06	siPHF14+Z2	19.9431	1.09074e+06
GAPDH		Ct	Calculated quantity	Mean
G01	siC	15.4637	2.43312e+07	2.57642e+07
G02	siC	15.303	2.71971e+07
G03	siZ1	15.9987	1.67926e+07	1.70533e+07
G04	siZ1	15.9546	1.7314e+07
G05	siZ2	14.7974	3.86126e+07	3.74298e+07
G06	siZ2	14.8886	3.62469e+07
G07	Z1+2	15.684	2.0885e+07	2.14155e+07
G08	Z1+2	15.6125	2.1946e+07
G09	siSIRT1	15.6134	2.19326e+07	2.21979e+07
G10	siSIRT1	15.5789	2.24633e+07
G11	siPHF14	15.9015	1.79631e+07	1.9956e+07
G12	siPHF14	15.6124	2.19489e+07
H01	SIRT1+PHF14	16.1715	1.48973e+07	1.88362e+07
H02	SIRT1+PHF14	15.5591	2.2775e+07
H03	siSIRT1 + Z1	15.3567	2.62043e+07	2.46864e+07
H04	siSIRT1 + Z1	15.5343	2.31686e+07
H05	siPHF14+Z2	15.2378	2.84547e+07	2.89622e+07
H06	siPHF14+Z2	15.1873	2.94697e+07

## Sheet: N2
Title: Source Data of histogrammes on figure 7A and on figure 7-Figure suppement 1B showing that the antagonism between H2A.Z.1 and H2A.Z.2 is mediated by SIRT1 and PHF14
PLAT		Ct	Calculated quantity	Mean	Mean GAPDH	moy/GAPDH	/siC
A01	siC	20.689	650421	662304	2.47505e+07	0.0267592	1
A02	siC	20.6372	674186
A03	siZ1	19.7418	1.25404e+06	1.23135e+06	2.14834e+07	0.0573163	2.14193
A04	siZ1	19.795	1.20866e+06
A05	siZ2	20.2002	912735	900617	3.6736e+07	0.0245159	0.916169
A06	siZ2	20.239	888500
A07	siZ1+2	20.812	597249	632435	2.17665e+07	0.0290554	1.08581
A08	siZ1+2	20.6513	667620
A09	siSIRT1	21.6314	338447	331556	2.22046e+07	0.0149319	0.55801
A10	siSIRT1	21.6914	324666				,
A11	siPHF14+siSIRT1	19.2663	1.74363e+06	1.83683e+06	2.12751e+07	0.0863371	3.22645
A12	siPHF14+siSIRT1	19.1198	1.93004e+06
B01	siPHF14	20.2138	904170	810400	2.16163e+07	0.0374902	1.40102
B02	siPHF14	20.5491	716630
B03	siSIRT1+Z1	21.1335	477939	466818	2.1919e+07	0.0212974	0.795891
B04	siSIRT1+Z1	21.2023	455697
B05	siPHF1+Z2	19.7963	1.20762e+06	1.18264e+06	2.1887e+07	0.0540341	2.01928
B06	siPHF1+Z2	19.8572	1.15767e+06
COLEC12		Ct	Calculated quantity	Mean	Mean GAPDH	moy/GAPDH
E01	siC	22.3525	205314	205786	2.47505e+07	0.00831441	1
E02	siC	22.3459	206259
E03	siZ1	22.7212	159013	159364	2.14834e+07	0.00741799	0.892185
E04	siZ1	22.7149	159715
E05	siZ2	20.947	543918	567136	3.6736e+07	0.0154382	1.85679
E06	siZ2	20.8288	590354
E07	siZ1+2	22.0141	259587	269708	2.17665e+07	0.012391	1.4903
E08	siZ1+2	21.9058	279828
E09	siSIRT1	23.5748	87996.9	87871.2	2.22046e+07	0.00395734	0.475961
E10	siSIRT1	23.579	87745.4				,
E11	siPHF14+siSIRT1	22.5644	177268	178301	2.12751e+07	0.00838075	1.00798
E12	siPHF14+siSIRT1	22.5477	179334
F01	siPHF14	23.2145	112966	114609	2.16163e+07	0.00530197	0.637684
F02	siPHF14	23.1731	116252
F03	siSIRT1+Z1	23.4986	92773.9	87895.5	2.1919e+07	0.00401	0.482296
F04	siSIRT1+Z1	23.6589	83017
F05	siPHF1+Z2	22.0639	250788	250992	2.1887e+07	0.0114676	1.37925
F06	siPHF1+Z2	22.0615	251196
AKAP12	z	Ct	Calculated quantity	Mean	Mean GAPDH	moy/GAPDH	/siC
A01	siC	24.3555	51223.8	55968.3	2.47505e+07	0.00226129	1
A02	siC	24.1103	60712.7
A03	siZ1	22.8871	141744	139573	2.14834e+07	0.00649677	2.87303
A04	siZ1	22.932	137402
A05	siZ2	23.9243	69067.5	67241.6	3.6736e+07	0.0018304	0.809447
A06	siZ2	24.0027	65415.7
A07	siZ1+2	23.0645	125343	125891	2.17665e+07	0.00578371	2.5577
A08	siZ1+2	23.0519	126439
A09	siSIRT1	24.3454	51581.6	48363.5	2.22046e+07	0.00217808	0.963202
A10	siSIRT1	24.5377	45145.4				,
A11	siPHF14	23.8166	74421	77546.5	2.12751e+07	0.00364494	1.61188
A12	siPHF14	23.7002	80672
B01	siSIRT1+PHF14	24.0718	62355.9	62203.9	2.16163e+07	0.00287764	1.27256
B02	siSIRT1+PHF14	24.0788	62051.9
B03	siSIRT1+Z1	23.4093	98693	100251	2.1919e+07	0.00457369	2.0226
B04	siSIRT1+Z1	23.3645	101809
B05	siPHF1+Z2	24.1039	60983.9	61115	2.1887e+07	0.0027923	1.23482
B06	siPHF1+Z2	24.0977	61246.2
ADAMTS1	z	Ct	Calculated quantity	Mean	Mean GAPDH	moy/GAPDH	/siC
A01	siC	20.353	820968	783297	2.47505e+07	0.0316476	1
A02	siC	20.4919	745626
A03	siZ1	21.4836	374958	377686	2.14834e+07	0.0175804	0.555503
A04	siZ1	21.4628	380414
A05	siZ2	19.0788	1.98568e+06	1.93666e+06	3.6736e+07	0.0527182	1.66578
A06	siZ2	19.1519	1.88763e+06
A07	siZ1+2	20.8921	564992	504735	2.17665e+07	0.0231886	0.732712
A08	siZ1+2	21.2383	444477
A09	siSIRT1	20.9612	538594	511246	2.22046e+07	0.0230243	0.727521
A10	siSIRT1	21.1157	483898				,
A11	siPHF14	20.9021	561092	549904	2.12751e+07	0.0258473	0.81672
A12	siPHF14	20.9608	538715
B01	siSIRT1+PHF14	22.046	253910	251049	2.16163e+07	0.0116139	0.366974
B02	siSIRT1+PHF14	22.0789	248188
B03	siSIRT1+Z1	21.7744	306525	275734	2.1919e+07	0.0125797	0.397492
B04	siSIRT1+Z1	22.0979	244944
B05	siPHF1+Z2	21.1607	469031	464899	2.1887e+07	0.0212409	0.671168
B06	siPHF1+Z2	21.1863	460766

## Sheet: N3
Title: Source Data of histogrammes on figure 7A and on figure 7-Figure suppement 1B showing that the antagonism between H2A.Z.1 and H2A.Z.2 is mediated by SIRT1 and PHF14
PLAT	z	Ct	Calculated quantity	Mean	Mean GAPDH	moy/GAPDH	/siC
A01	siC	20.7914	605838	592658	2.13021e+07	0.0278216	1
A02	siC	20.8556	579479
A03	siZ1	19.5845	1.3985e+06	1.2276e+06	1.70634e+07	0.0719435	2.58588
A04	siZ1	19.9889	1.0567e+06
A05	siZ2	21.0235	515822	516615	2.25479e+07	0.0229119	0.823527
A06	siZ2	21.0191	517409
A07	siZ1+2	22.5872	174497	186467	1.04824e+07	0.0177885	0.639376
A08	siZ1+2	22.4017	198437
A09	siSIRT1	21.9247	276188	268036	2.07336e+07	0.0129276	0.464661
A10	siSIRT1	22.0125	259883				,
A11	siPHF14	19.6994	1.29149e+06	1.33062e+06	1.61297e+07	0.0824947	2.96513
A12	siPHF14	19.6145	1.36974e+06
B01	siSIRT1+PHF14	20.6666	660593	672928	1.98664e+07	0.0338727	1.21749
B02	sisIRT1+PHF14	20.6137	685263
B03	siSIRT1+Z1	21.7608	309419	288900	1.99894e+07	0.0144527	0.519477
B04	siSIRT1+Z1	21.9661	268382
B05	siSIRT1+Z2	22.4263	195073	187443	2.10049e+07	0.00892379	0.32075
B06	siSIRT1+Z2	22.5439	179814
COLEC12		Ct	Calculated quantity	Mean	Mean GAPDH	moy/GAPDH
E01	siC	23.4256	97587.7	95760.4	2.13021e+07	0.00449536	1
E02	siC	23.4807	93933.1
E03	siZ1	23.1425	118745	113440	1.70634e+07	0.00664817	1.4789
E04	siZ1	23.2775	108136
E05	siZ2	21.7566	310322	317524	2.25479e+07	0.0140822	3.1326
E06	siZ2	21.6911	324725
E07	siZ1+2	24.1732	58122.5	57277.8	1.04824e+07	0.00546416	1.21551
E08	siZ1+2	24.2157	56433.1
E09	siSIRT1	24.5896	43551.5	43157.5	2.07336e+07	0.00208153	0.463039
E10	siSIRT1	24.6159	42763.6				,
E11	siPHF14	24.2274	55978.4	58236.1	1.61297e+07	0.00361048	0.803157
E12	siPHF14	24.1155	60493.7
F01	siSIRT1+PHF14	24.5262	45507.6	44683.8	1.98664e+07	0.00224921	0.500341
F02	sisIRT1+PHF14	24.5794	43859.9
F03	siSIRT1+Z1	24.4953	46493.4	47187.4	1.99894e+07	0.00236063	0.525125
F04	siSIRT1+Z1	24.4528	47881.4
F05	siSIRT1+Z2	22.8573	144704	139742	2.10049e+07	0.00665283	1.47993
F06	siSIRT1+Z2	22.9598	134780
AKAP12	z	Ct	Calculated quantity	Mean	Mean GAPDH	moy/GAPDH	/siC
A01	siC	22.808	149728	153801	2.13021e+07	0.00722001	1
A02	siC	22.7316	157874
A03	siZ1	22.7286	158206	159687	1.70634e+07	0.00935845	1.29618
A04	siZ1	22.7018	161168
A05	siZ2	23.6991	80736.4	75839.1	2.25479e+07	0.00336346	0.465853
A06	siZ2	23.8857	70941.8
A07	siZ1+2	23.354	102554	97206.1	1.04824e+07	0.00927323	1.28438
A08	siZ1+2	23.5129	91858.2
A09	siSIRT1	24.211	56620.6	50875.9	2.07336e+07	0.00245379	0.33986
A10	siSIRT1	24.5382	45131.1				,
A11	siPHF14	23.2855	107537	98906.2	1.61297e+07	0.00613192	0.849295
A12	siPHF14	23.5379	90275.8
B01	siSIRT1+PHF14	23.4138	98389.6	93110.8	1.98664e+07	0.00468685	0.649147
B02	sisIRT1+PHF14	23.5775	87832
B03	siSIRT1+Z1	22.9018	140309	144424	1.99894e+07	0.00722502	1.00069
B04	siSIRT1+Z1	22.8195	148538
B05	siSIRT1+Z2	23.8505	72690.8	68724.7	2.10049e+07	0.00327184	0.453163
B06	siSIRT1+Z2	24.0172	64758.6
B07	siPHF14+Z1	23.0368	127769	130441	1.1708e+07	0.0111412	1.5431
B08	siPHF14+Z1	22.9777	133113
B09	siPHF14+Z2	23.5811	87617.3	89729.9	1.3343e+07	0.00672489	0.931424
B10	siPHF14+Z2	23.5131	91842.6
ADAMTS1	z	Ct	Qt Calculé	Moyennes	moyennes GAPDH	moy/GAPDH	/siC
A01	siC	20.1944	916415	873362	2.13021e+07	0.0409989	1
A02	siC	20.3367	830310
A03	siZ1	21.9254	276063	285376	1.70634e+07	0.0167244	0.407924
A04	siZ1	21.8312	294689
A05	siZ2	18.752	2.49052e+06	2.42236e+06	2.25479e+07	0.107432	2.62035
A06	siZ2	18.8332	2.3542e+06
A07	siZ1+2	22.2872	214827	198983	1.04824e+07	0.0189825	0.463
A08	siZ1+2	22.5174	183140
A09	siSIRT1	20.6687	659617	670722	2.07336e+07	0.0323496	0.789034
A10	siSIRT1	20.621	681827				,
A11	siPHF14	20.2787	864363	871743	1.61297e+07	0.0540457	1.31822
A12	siPHF14	20.2543	879123
B01	siSIRT1+PHF14	20.8726	572693	513324	1.98664e+07	0.0258388	0.630231
B02	sisIRT1+PHF14	21.2078	453954
B03	siSIRT1+Z1	21.3699	405700	429068	1.99894e+07	0.0214648	0.523546
B04	siSIRT1+Z1	21.2126	452436
B05	siSIRT1+Z2	20.5173	732592	726293	2.10049e+07	0.0345773	0.843371
B06	siSIRT1+Z2	20.5424	719995

## Sheet: Summary
Title: Source Data of histogrammes on figure 7A and on figure 7-Figure suppement 1B showing that the antagonism between H2A.Z.1 and H2A.Z.2 is mediated by SIRT1 and PHF14
PLAT	N=1	N=2	N=3	Mean	Error bars
siC	1	1	1	1	0
siZ1	3.5306	2.14193	2.58588	2.7528	0.409469
siZ2	0.730067	0.916169	0.823527	0.823254	0.0537234
siZ1+2	1.46639	1.08581	0.639376	1.06386	0.238991
siSIRT1	0.770646	0.55801	0.464661	0.597772	0.0905402
siPHF14	2.2076	3.22645	2.96513	2.79973	0.305523
siSIRT1+PHF14	1.18	1.40102	1.21749	1.26617	0.0682888
siSIRT1+Z1	0.951546	0.795891	0.519477	0.755638	0.126341
siPHF14+Z2	1.55165	2.01928	2.53519	2.03537	0.284039
COLEC12	N=1	N=2	N=3	Mean	Error bars
siC	1	1	1	1	0
siZ1	1.29812	0.892185	1.4789	1.22307	0.173476
siZ2	3.23414	1.85679	3.1326	2.74118	0.443163
siZ1+2	2.04857	1.4903	1.21551	1.58479	0.245081
siSIRT1	1.12162	0.475961	0.463039	0.686873	0.217404
siPHF14	0.917251	1.00798	0.803157	0.909462	0.059255
SIRT+PHF14	1.245	0.637684	0.500341	0.794342	0.228791
siSIRT1+Z1	0.974791	0.482296	0.525125	0.660737	0.157513
siPHF14+Z2	1.5654	1.37925	1.4549	1.46652	0.0540512
AKAP12	N=1	N=2	N=3	Mean	Error bars
siC	1	1	1	1	0
siZ1	1.42912	2.87303	1.29618	1.86611	0.50492
siZ2	0.576597	0.809447	0.465853	0.617299	0.101253
siZ1+2	1.52998	2.5577	1.28438	1.79068	0.390004
siSIRT1	0.466936	0.963202	0.33986	0.589999	0.190173
siPHF14	0.993709	1.61188	0.849295	1.15163	0.233872
siSIRT1+PHF14	1.026	1.27256	0.649147	0.98257	0.18127
siSIRT1+Z1	0.803845	2.0226	1.00069	1.27571	0.377741
siPHF14+Z2	0.927744	1.23482	0.931424	1.03133	0.101752
ADAMTS1	N=1	N=2	N=3	Mean	Error bars
siC	1	1	1	1	0
siZ1	0.603325	0.555503	0.407924	0.522251	0.0588067
siZ2	2.51773	1.66578	2.62035	2.26795	0.302539
siZ1+2	1.05227	0.732712	0.463	0.749328	0.170311
siSIRT1	1.60855	0.727521	0.789034	1.0417	0.283979
siPHF14	1.29587	0.81672	1.31822	1.14361	0.16357
siSIRT+PHF14	1.144	0.366974	0.630231	0.713735	0.228161
siSIRT1+Z1	1.05737	0.397492	0.523546	0.65947	0.202251
siPHF14+Z2	1.35949	0.671168	1.457	1.16255	0.2473
