# Supplementary material for: Integrated analysis of H2A.Z isoforms function reveals a complex interplay in gene regulation
Source: eLife. 2020 Feb 28;9:e53375. doi: 10.7554/eLife.53375 (PMC7048395; doi:10.7554/eLife.53375)
Supplement: Figure 7—source data 1. [file elife-53375-fig7-data1.xlsx]

## Sheet: ChIP 1 
Title: Source Data of histogramms in Figure 7C representing ChIP H3K9 after PHF14 depletion on different promoters
	RRM2			2^(40-Ct)	Mean Input	% Input	/GAPDHmouse	Mean				GAPDH mouse			2^(40-Ct)	Mean Input	% Input
Input	siC		26.7479	9756.51	10046.4						Input	siC		30.74	613.109	619.55
			26.6646	10336.4										30.71	625.992
	siPHF14		26.2074	14189.8	13534.5							siPHF14		30.86	564.175	641.626
			26.3472	12879.2										30.51	719.076
	RRM2			2^(40-Ct)	/ Input	% Input	/GAPDHmouse	Mean	/siCTrl	/H3		GAPDH mouse			2^(40-Ct)	/ Input	% Input	Mean
ChIP H3K9	siC		30.02	1009.9	0.100523	1.00523	0.2786	0.263977	1	1	ChIP H3K9	siC		32.37	198.088	0.319729	3.19729	3.60816
			30.18	903.888	0.089971	0.89971	0.249354							32.04	249	0.401904	4.01904
	siPHF14		30.85	568.1	0.0419741	0.419741	0.0933476	0.0825397	0.312678	0.328858		siPHF14		31.62	333.144	0.519218	5.19218	4.49654
			31.23	436.549	0.0322545	0.322545	0.0717318							32.07	243.875	0.38009	3.8009
	RRM2			2^(40-Ct)	/ Input	% Input	/GAPDHmouse	Mean	/siCTrl			GAPDH mouse			2^(40-Ct)	/ Input	% Input	Mean
ChiP H3	siC		26.9	8779.97	0.873938	4.36969	0.962581	0.979554	1		ChIP H3	siC		30.91	544.958	0.879602	4.39801	4.53956
			26.85	9089.59	0.904758	4.52379	0.996526							30.82	580.037	0.936222	4.68111
	siPHF14		26.99	8248.98	0.609477	3.04739	0.89587	0.931359	0.950799			siPHF14		31.49	364.557	0.568177	2.84088	3.4016
			26.88	8902.53	0.657765	3.28882	0.966848							31.01	508.463	0.792461	3.96231
	AKAP12			2^(40-Ct)	Mean Input	% Input	/GAPDHmouse	Mean				GAPDH mouse			2^(40-Ct)	Mean Input	% Input
Input	siC		27.09	7696.57	6805.45						Input	siC		30.74	613.109	619.55
			27.47	5914.33										30.71	625.992
	siPHF14		26.81	9345.14	9185.97							siPHF14		30.86	564.175	641.626
			26.86	9026.81										30.51	719.076
	AKAP12			2^(40-Ct)	/ Input	% Input	/GAPDHmouse	Mean	/siCTrl	/H3		GAPDH mouse			2^(40-Ct)	/ Input	% Input	Mean
ChIP H3K9	siC		29.25	1722.16	0.253055	2.53055	0.701341	0.810187	1	1	ChIP H3K9	siC		32.37	198.088	0.319729	3.19729	3.60816
			28.86	2256.7	0.331602	3.31602	0.919032							32.04	249	0.401904	4.01904
	siPHF14		29.67	1287.18	0.140125	1.40125	0.311628	0.317123	0.391419	0.520876		siPHF14		31.62	333.144	0.519218	5.19218	4.49654
			29.62	1332.57	0.145066	1.45066	0.322618							32.07	243.875	0.38009	3.8009
	AKAP12			2^(40-Ct)	/ Input	% Input	/GAPDHmouse	Mean	/siCTrl			GAPDH mouse			2^(40-Ct)	/ Input	% Input	Mean
ChIP H3	siC		26.63	10587	1.55566	7.77829	1.71345	1.78775	1		ChIP H3K9	siC		30.91	544.958	0.879602	4.39801	4.53956
			26.51	11505.2	1.69059	8.45294	1.86206							30.82	580.037	0.936222	4.68111
	siPHF14		26.93	8599.28	0.936132	4.68066	1.37602	1.34343	0.751464			siPHF14		31.49	364.557	0.568177	2.84088	3.4016
			27	8192	0.891795	4.45897	1.31085							31.01	508.463	0.792461	3.96231
	GAPDH human			2^(40-Ct)	Mean Input	% Input	/GAPDHmouse	Mean				GAPDH mouse			2^(40-Ct)	Mean Input	% Input
Input	siC		26.55	11190.6	9835.75						Input	siC		30.74	613.109	619.55
			26.95	8480.89										30.71	625.992
	siPHF14		26.92	8659.09	8689.21							siPHF14		30.86	564.175	641.626
			26.91	8719.32										30.51	719.076
	GAPDH human			2^(40-Ct)	/ Input	% Input	/GAPDHmouse	Mean	/siCTrl	/H3		GAPDH mouse			2^(40-Ct)	/ Input	% Input	Mean
ChIP H3K9	siC		29.65	1305.15	0.132695	1.32695	0.367762	0.486766	1	1	ChIP H3K9	siC		32.37	198.088	0.319729	3.19729	3.60816
			28.93	2149.82	0.218572	2.18572	0.605771							32.04	249	0.401904	4.01904
	siPHF14		28.67	2574.36	0.296271	2.96271	0.658888	0.677672	1.39219	1.10931		siPHF14		31.62	333.144	0.519218	5.19218	4.49654
			28.59	2721.15	0.313164	3.13164	0.696456							32.07	243.875	0.38009	3.8009
	GAPDH human			2^(40-Ct)	/ Input	% Input	/GAPDHmouse	Mean	/siCTrl			GAPDH mouse			2^(40-Ct)	/ Input	% Input	Mean
ChiP H3	siC		27.59	5442.3	0.553318	2.76659	0.609441	0.517224	1		ChIP H3	siC		30.91	544.958	0.879602	4.39801	4.53956
			28.11	3795.3	0.385869	1.92934	0.425007							30.82	580.037	0.936222	4.68111
	siPHF14		27.97	4182.07	0.481294	2.40647	0.707454	0.64912	1.25501			siPHF14		31.49	364.557	0.568177	2.84088	3.4016
			28.23	3492.39	0.401923	2.00962	0.590786							31.01	508.463	0.792461	3.96231
	actine beta			2^(40-Ct)	Mean Input	% Input	/GAPDHmouse	Mean				GAPDH mouse			2^(40-Ct)	Mean Input	% Input
Input	siC		25.16	29328.2	30272.1						Input	siC		30.74	613.109	619.55
			25.07	31216										30.71	625.992
	siPHF14		24.68	40905.3	40623.7							siPHF14		30.86	564.175	641.626
			24.7	40342.1										30.51	719.076
	actin beta			2^(40-Ct)	/ Input	% Input	/GAPDHmouse	Mean	/siCTrl	/H3		GAPDH mouse			2^(40-Ct)	/ Input	% Input	Mean
ChIP H3K9	siC		26.74	9809.75	0.324052	3.24052	0.898108	0.927014	1	1	ChIP H3K9	siC		32.37	198.088	0.319729	3.19729	3.60816
			26.65	10441.2	0.344912	3.44912	0.95592							32.04	249	0.401904	4.01904
	siPHF14		26.81	9345.14	0.230041	2.30041	0.511597	0.513376	0.553795	1.0439		siPHF14		31.62	333.144	0.519218	5.19218	4.49654
			26.8	9410.14	0.231641	2.31641	0.515155							32.07	243.875	0.38009	3.8009
	actin beta			2^(40-Ct)	/ Input	% Input	/GAPDHmouse	Mean	/siCTrl			GAPDH mouse			2^(40-Ct)	/ Input	% Input	Mean
ChiP H3	siC		23.73	79023.8	2.61045	13.0522	2.87522	2.85543	1		ChIP H3	siC		30.91	544.958	0.879602	4.39801	4.53956
			23.75	77935.9	2.57451	12.8726	2.83564							30.82	580.037	0.936222	4.68111
	siPHF14		24.55	44762.4	1.10188	5.50939	1.61965	1.51482	0.530504			siPHF14		31.49	364.557	0.568177	2.84088	3.4016
			24.75	38967.9	0.959241	4.79621	1.40999							31.01	508.463	0.792461	3.96231
	PLAT			2^(40-Ct)	Mean Input	% Input	/GAPDHmouse	Mean				GAPDH mouse			2^(40-Ct)	Mean Input	% Input
Input	siC		26.95	8480.89	8848.68						Input	siC		30.74	613.109	619.55
			26.83	9216.48										30.71	625.992
	siPHF14		26.54	11268.4	11799.7							siPHF14		30.86	564.175	641.626
			26.41	12331										30.51	719.076
	PLAT			2^(40-Ct)	/ Input	% Input	/GAPDHmouse	Mean	/siCTrl	/H3		GAPDH mouse			2^(40-Ct)	/ Input	% Input	Mean
ChIP H3K9	siC		31.27	424.612	0.0479858	0.479858	0.132992	0.133455	1	1	ChIP H3K9	siC		32.37	198.088	0.319729	3.19729	3.60816
			31.26	427.565	0.0483196	0.483196	0.133917							32.04	249	0.401904	4.01904
	siPHF14		30.92	541.193	0.045865	0.45865	0.102001	0.0878207	0.658055	0.893053		siPHF14		31.62	333.144	0.519218	5.19218	4.49654
			31.39	390.722	0.0331129	0.331129	0.0736408							32.07	243.875	0.38009	3.8009
	PLAT			2^(40-Ct)	/ Input	% Input	/GAPDHmouse	Mean	/siCTrl			GAPDH mouse			2^(40-Ct)	/ Input	% Input	Mean
ChiP H3	siC		26.13	14972.2	1.69203	8.46014	1.86365	1.99481	1		ChIP H3	siC		30.91	544.958	0.879602	4.39801	4.53956
			25.94	17079.8	1.9302	9.65102	2.12598							30.82	580.037	0.936222	4.68111
	siPHF14		26.54	11268.4	0.954976	4.77488	1.40372	1.4699	0.73686			siPHF14		31.49	364.557	0.568177	2.84088	3.4016
			26.41	12331	1.04502	5.22512	1.53608							31.01	508.463	0.792461	3.96231

## Sheet: ChIP 2 
Title: Source Data of histogramms in Figure 7C representing ChIP H3K9 after PHF14 depletion on different promoters
	RRM2			2^(40-Ct)	Mean Input	% Input	/GAPDHmouse	Mean				GAPDH mouse			2^(40-Ct)	Mean Input	% Input
Input	siC		26.63	10587	10660.8						Input	siC		30.52	714.109	706.761
			26.61	10734.7										30.55	699.413
	siPHF14		26.56	11113.3	10924							siPHF14		30.7	630.346	674.711
			26.61	10734.7										30.51	719.076
	RRM2			2^(40-Ct)	/ Input	% Input	/GAPDHmouse	Mean	/siCTrl	/H3		GAPDH mouse			2^(40-Ct)	/ Input	% Input	Mean
ChIP H3K9	siC		28.52	2856.44	0.267937	2.67937	0.847114	0.787209	1	1	ChIP H3K9	siC		32.37	198.088	0.280276	2.80276	3.16294
			28.74	2452.44	0.230041	2.30041	0.727303							32.04	249	0.352311	3.52311
	siPHF14		28.84	2288.2	0.209465	2.09465	0.552782	0.566524	0.719661	0.685264		siPHF14		32.1	238.856	0.354013	3.54013	3.78929
			28.77	2401.97	0.219879	2.19879	0.580265							31.91	272.479	0.403845	4.03845
	RRM2			2^(40-Ct)	/ Input	% Input	/GAPDHmouse	Mean	/siCTrl	/H3		GAPDH mouse			2^(40-Ct)	/ Input	% Input	Mean
ChiP H3	siC		26.01	16270.8	1.52622	7.63111	0.849711	0.731586	1		ChIP H3	siC		29.69	1269.46	1.79617	8.98084	8.98084
			26.48	11747	1.10188	5.50939	0.613461							29.69	1269.46	1.79617	8.98084
	siPHF14		26.74	9809.75	0.897998	4.48999	0.784283	0.768309	1.0502			siPHF14		30.31	826.001	1.22423	6.12115	5.72496
			26.8	9410.14	0.861417	4.30708	0.752334							30.51	719.076	1.06575	5.32877
			26	16384
	AKAP12			2^(40-Ct)	Mean Input	% Input	/GAPDHmouse	Mean				GAPDH mouse			2^(40-Ct)	Mean Input	% Input
Input	siC		27.02	8079.22	7834.91						Input	siC		30.52	714.109	706.761
			27.11	7590.61										30.55	699.413
	siPHF14		27	8192	7813.2							siPHF14		30.7	630.346	674.711
			27.14	7434.4										30.51	719.076
	AKAP12			2^(40-Ct)	/ Input	% Input	/GAPDHmouse	Mean	/siCTrl	/H3		GAPDH mouse			2^(40-Ct)	/ Input	% Input	Mean
ChIP H3K9	siC		28.41	3082.75	0.393463	3.93463	1.24398	1.19832	1	1	ChIP H3K9	siC		32.37	198.088	0.280276	2.80276	3.16294
			28.52	2856.44	0.364578	3.64578	1.15266							32.04	249	0.352311	3.52311
	siPHF14		28.69	2538.92	0.324953	3.24953	0.857556	0.866565	0.723152	0.745912		siPHF14		32.1	238.856	0.354013	3.54013	3.78929
			28.66	2592.27	0.331781	3.31781	0.875575							31.91	272.479	0.403845	4.03845
	AKAP12			2^(40-Ct)	/ Input	% Input	/GAPDHmouse	Mean	/siCTrl			GAPDH mouse			2^(40-Ct)	/ Input	% Input	Mean
ChIP H3	siC		26.24	13873.1	1.77067	8.85337	0.985806	0.975663	1		ChIP H3	siC		29.69	1269.46	1.79617	8.98084	8.98084
			26.27	13587.6	1.73423	8.67117	0.965519							29.69	1269.46	1.79617	8.98084
	siPHF14		26.82	9280.58	1.18781	5.93904	1.03739	0.945892	0.969487			siPHF14		30.31	826.001	1.22423	6.12115	5.72496
			27.1	7643.41	0.978269	4.89134	0.854389							30.51	719.076	1.06575	5.32877
	GAPDH human			2^(40-Ct)	Mean Input	% Input	/GAPDHmouse	Mean				GAPDH mouse			2^(40-Ct)	Mean Input	% Input
Input	siC		26.84	9152.82	9058.64						Input	siC		30.52	714.109	706.761
			26.87	8964.45										30.55	699.413
	siPHF14		26.96	8422.31	8451.6							siPHF14		30.7	630.346	674.711
			26.95	8480.89										30.51	719.076
	GAPDH human			2^(40-Ct)	/ Input	% Input	/GAPDHmouse	Mean	/siCTrl	/H3		GAPDH mouse			2^(40-Ct)	/ Input	% Input	Mean
ChIP H3K9	siC		28.1	3821.7	0.421885	4.21885	1.33384	1.32011	1	1	ChIP H3K9	siC		32.37	198.088	0.280276	2.80276	3.16294
			28.13	3743.05	0.413203	4.13203	1.30639							32.04	249	0.352311	3.52311
	siPHF14		28.09	3848.29	0.455332	4.55332	1.20163	1.46236	1.10775	1.42949		siPHF14		32.1	238.856	0.354013	3.54013	3.78929
			27.57	5518.27	0.652926	6.52926	1.72308							31.91	272.479	0.403845	4.03845
	GAPDH human			2^(40-Ct)	/ Input	% Input	/GAPDHmouse	Mean	/siCTrl	/H3		GAPDH mouse			2^(40-Ct)	/ Input	% Input	Mean
ChiP H3	siC		26.55	11190.6	1.23535	6.17676	0.687771	0.687771	1		ChIP H3	siC		29.69	1269.46	1.79617	8.98084	8.98084
			26.55	11190.6	1.23535	6.17676	0.687771							29.69	1269.46	1.79617	8.98084
	siPHF14		27.46	5955.47	0.704656	3.52328	0.615425	0.532971	0.774925			siPHF14		30.31	826.001	1.22423	6.12115	5.72496
			27.91	4359.66	0.515838	2.57919	0.450517							30.51	719.076	1.06575	5.32877
	Actin beta			2^(40-Ct)	Mean Input	% Input	/GAPDHmouse	Mean				GAPDH mouse			2^(40-Ct)	Mean Input	% Input
Input	siC		24.82	37122.3	35059.1						Input	siC		30.52	714.109	706.761
			24.99	32995.9										30.55	699.413
	siPHF14		24.78	38166	37644.2							siPHF14		30.7	630.346	674.711
			24.82	37122.3										30.51	719.076
	Actin beta			2^(40-Ct)	/ Input	% Input	/GAPDHmouse	Mean	/siCTrl	/H3		GAPDH mouse			2^(40-Ct)	/ Input	% Input	Mean
ChIP H3K9	siC		26.26	13682.1	0.390257	3.90257	1.23384	1.23384	1	1	ChIP H3K9	siC		32.37	198.088	0.280276	2.80276	3.16294
			26.26	13682.1	0.390257	3.90257	1.23384							32.04	249	0.352311	3.52311
	siPHF14		26.2	14263.1	0.378893	3.78893	0.999904	1.01041	0.818911	0.989968		siPHF14		32.1	238.856	0.354013	3.54013	3.78929
			26.17	14562.8	0.386854	3.86854	1.02091							31.91	272.479	0.403845	4.03845
	Actin beta			2^(40-Ct)	/ Input	% Input	/GAPDHmouse	Mean	/siCTrl	/H3		GAPDH mouse			2^(40-Ct)	/ Input	% Input	Mean
ChiP H3	siC		23.87	71715.6	2.04556	10.2278	1.13885	1.1755	1		ChIP H3	siC		29.69	1269.46	1.79617	8.98084	8.98084
			23.78	76332	2.17724	10.8862	1.21216							29.69	1269.46	1.79617	8.98084
	siPHF14		24.63	42347.8	1.12495	5.62475	0.982496	0.972387	0.82721			siPHF14		30.31	826.001	1.22423	6.12115	5.72496
			24.66	41476.3	1.1018	5.509	0.962277							30.51	719.076	1.06575	5.32877
	PLAT			2^(40-Ct)	Mean Input	% Input	/GAPDHmouse	Mean				GAPDH mouse			2^(40-Ct)	Mean Input	% Input
Input	siC		26.69	10155.7	10191						Input	siC		30.52	714.109	706.761
			26.68	10226.3										30.55	699.413
	siPHF14		26.66	10369.1	10369.1							siPHF14		30.7	630.346	674.711
			26.66	10369.1										30.51	719.076
	PLAT			2^(40-Ct)	/ Input	% Input	/GAPDHmouse	Mean	/siCTrl	/H3		GAPDH mouse			2^(40-Ct)	/ Input	% Input	Mean
ChIP H3K9	siC		30.3805	786.582	0.077184	0.77184	0.244026	0.222298	1	1	ChIP H3K9	siC		32.37	198.088	0.280276	2.80276	3.16294
			30.6635	646.51	0.0634392	0.634392	0.200571							32.04	249	0.352311	3.52311
	siPHF14		30.5459	701.387	0.0676422	0.676422	0.178509	0.181674	0.817252	0.958299		siPHF14		32.1	238.856	0.354013	3.54013	3.78929
			30.4957	726.258	0.0700407	0.700407	0.184839							31.91	272.479	0.403845	4.03845
	PLAT			2^(40-Ct)	/ Input	% Input	/GAPDHmouse	Mean	/siCTrl	/H3		GAPDH mouse			2^(40-Ct)	/ Input	% Input	Mean
ChiP H3	siC		25.9168	17356.4	1.70311	8.51554	0.94819	1.01189	1		ChIP H3	siC		29.69	1269.46	1.79617	8.98084	8.98084
			25.7349	19688.6	1.93196	9.65978	1.0756							29.69	1269.46	1.79617	8.98084
	siPHF14		26.6932	10133.4	0.977269	4.88634	0.853516	0.862958	0.852815			siPHF14		30.31	826.001	1.22423	6.12115	5.72496
			26.6616	10357.6	0.998892	4.99446	0.872401							30.51	719.076	1.06575	5.32877

## Sheet: ChIP 3 
Title: Source Data of histogramms in Figure 7C representing ChIP H3K9 after PHF14 depletion on different promoters
	RRM2			2^(40-Ct)	Mean Input	% Input						spike in			2^(40-Ct)	Mean Input	% Input
Input	siC		25.6	21618.8	21769.7						Input	siC		31.74	306.555	299.295
			25.58	21920.6										31.81	292.036
	siPHF14		25.82	18561.2	18690.7							siPHF14		31.59	340.144	427.852
			25.8	18820.3										30.99	515.561
	RRM2			2^(40-Ct)	/ Input	% Input	/spike in	Mean	/siCTrl	/H3		spike in			2^(40-Ct)	/ Input	% Input	Mean
ChIP H3K9	siC		27.63	5293.48	0.243158	2.43158	0.714622	0.734995	1	1	ChIP H3K9	siC		33.35	100.427	0.335544	3.35544	3.40261
			27.55	5595.3	0.257022	2.57022	0.755368							33.31	103.25	0.344978	3.44978
	siPHF14		28.63	2646.74	0.141607	1.41607	0.371229	0.385935	0.525085	0.536541		siPHF14		32.69	158.683	0.370882	3.70882	3.81455
			28.52	2856.44	0.152826	1.52826	0.400641							32.61	167.73	0.392029	3.92029
	RRM2			2^(40-Ct)	/ Input	% Input	/spike in	Mean	/siCTrl			spike in			2^(40-Ct)	/ Input	% Input	Mean
ChiP H3	siC		25.75	19484	0.895004	4.47502	1.35935	1.33166	1		ChIP H3	siC		32.17	227.544	0.760266	3.80133	3.29203
			25.81	18690.3	0.858545	4.29272	1.30397							32.62	166.572	0.556547	2.78274
	siPHF14		25.87	17928.9	0.959241	4.79621	1.30323	1.30323	0.978648			siPHF14		32.5	181.019	0.423088	2.11544	3.68025
			25.87	17928.9	0.959241	4.79621	1.30323							31.19	448.822	1.04901	5.24506
			26	16384
	AKAP12			2^(40-Ct)	Mean Input	% Input						spike in			2^(40-Ct)	Mean Input	% Input
Input	siC		26.07	15608	15447.4						Input	siC		31.74	306.555	299.295
			26.1	15286.8										31.81	292.036
	siPHF14		26.47	11828.7	11994.9							siPHF14		31.59	340.144	427.852
			26.43	12161.2										30.99	515.561
	AKAP12			2^(40-Ct)	/ Input	% Input	/spike in	Mean	/siCTrl	/H3		spike in			2^(40-Ct)	/ Input	% Input	Mean
ChIP H3K9	siC		27.77	4803.93	0.310986	3.10986	0.913963	0.967561	1	1	ChIP H3K9	siC		33.35	100.427	0.335544	3.35544	3.40261
			27.61	5367.37	0.347461	3.47461	1.02116							33.31	103.25	0.344978	3.44978
	siPHF14		28.56	2778.33	0.231625	2.31625	0.607214	0.659688	0.681805	0.733111		siPHF14		32.69	158.683	0.370882	3.70882	3.81455
			28.33	3258.52	0.271658	2.71658	0.712161							32.61	167.73	0.392029	3.92029
	AKAP12			2^(40-Ct)	/ Input	% Input	/spike in	Mean	/siCTrl			spike in			2^(40-Ct)	/ Input	% Input	Mean
ChIP H3	siC		25.9	17559.9	1.13676	11.3676	1.72653	1.71464	1		ChiP H3	siC		32.17	227.544	0.760266	7.60266	6.58406
			25.92	17318.2	1.12111	11.2111	1.70276							32.62	166.572	0.556547	5.56547
	siPHF14		26.28	13493.7	1.12495	11.2495	1.52836	1.59464	0.930015			siPHF14		32.5	181.019	0.423088	4.23088	7.3605
			26.16	14664.1	1.22252	12.2252	1.66092							31.19	448.822	1.04901	10.4901
	GAPDH human			2^(40-Ct)	Mean Input	% Input						spike in			2^(40-Ct)	Mean Input	% Input
Input	siC		26.02	16158.4	15462.3						Input	siC		31.74	306.555	299.295
			26.15	14766.1										31.81	292.036
	siPHF14		26.44	12077.2	12333.6							siPHF14		31.59	340.144	427.852
			26.38	12590.1										30.99	515.561
	GAPDH human			2^(40-Ct)	/ Input	% Input	/spike in	Mean	/siCTrl	/H3		spike in			2^(40-Ct)	/ Input	% Input	Mean
ChIP H3K9	siC		27.67	5148.73	0.332987	3.32987	0.978621	0.988902	1	1	ChIP H3K9	siC		33.35	100.427	0.335544	3.35544	3.40261
			27.64	5256.91	0.339983	3.39983	0.999184							33.31	103.25	0.344978	3.44978
	siPHF14		28.38	3147.52	0.255198	2.55198	0.669012	0.732302	0.74052	0.854345		siPHF14		32.69	158.683	0.370882	3.70882	3.81455
			28.13	3743.05	0.303483	3.03483	0.795593							32.61	167.73	0.392029	3.92029
	GAPDH human			2^(40-Ct)	/ Input	% Input	/spike in	Mean	/siCTrl			spike in			2^(40-Ct)	/ Input	% Input	Mean
ChiP H3	siC		26.68	10226.3	0.661373	3.30687	0.502253	0.490359	1		ChiP H3	siC		32.17	227.544	0.760266	7.60266	6.58406
			26.75	9741.98	0.630049	3.15025	0.478465							32.62	166.572	0.556547	5.56547
	siPHF14		27.3	6653.97	0.539497	2.69749	0.366482	0.425028	0.86677			siPHF14		32.5	181.019	0.423088	4.23088	7.3605
			26.9	8779.97	0.711871	3.55936	0.483575							31.19	448.822	1.04901	10.4901
	Actin beta			2^(40-Ct)	Mean Input	% Input						spike in			2^(40-Ct)	Mean Input	% Input
Input	siC		24.11	60724.9	68264.8						Input	siC		31.74	306.555	299.295
			23.79	75804.7										31.81	292.036
	siPHF14		24.42	48983.2	46872.8							siPHF14		31.59	340.144	427.852
			24.55	44762.4										30.99	515.561
	Actin beta			2^(40-Ct)	/ Input	% Input	/spike in	Mean	/siCTrl	/H3		spike in			2^(40-Ct)	/ Input	% Input	Mean
ChIP H3K9	siC		25.16	29328.2	0.429624	4.29624	1.26263	1.2759	1	1	ChIP H3K9	siC		33.35	100.427	0.335544	3.35544	3.40261
			25.13	29944.4	0.438651	4.38651	1.28916							33.31	103.25	0.344978	3.44978
	siPHF14		25.65	20882.4	0.445512	4.45512	1.16793	1.16389	0.912218	0.790227		siPHF14		32.69	158.683	0.370882	3.70882	3.81455
			25.66	20738.2	0.442435	4.42435	1.15986							32.61	167.73	0.392029	3.92029
	Actin beta			2^(40-Ct)	/ Input	% Input	/spike in	Mean	/siCTrl			spike in			2^(40-Ct)	/ Input	% Input	Mean
ChiP H3	siC		23.59	87076.8	1.27557	6.37787	0.968682	0.972051	1		ChiP H3	siC		32.17	227.544	0.760266	7.60266	6.58406
			23.58	87682.4	1.28445	6.42223	0.97542							32.62	166.572	0.556547	5.56547
	siPHF14		23.72	79573.5	1.69765	8.48823	1.15321	1.12211	1.15437			siPHF14		32.5	181.019	0.423088	4.23088	7.3605
			23.8	75281.1	1.60607	8.03036	1.09101							31.19	448.822	1.04901	10.4901
	PLAT			2^(40-Ct)	Mean Input	% Input						spike in			2^(40-Ct)	Mean Input	% Input
Input	siC		25.81	18690.3	19223.1						Input	siC		31.74	306.555	299.295
			25.73	19756										31.81	292.036
	siPHF14		26.06	15716.6	16107.3							siPHF14		31.59	340.144	427.852
			25.99	16498										30.99	515.561
	PLAT			2^(40-Ct)	/ Input	% Input	/spike in	Mean	/siCTrl	/H3		spike in			2^(40-Ct)	/ Input	% Input	Mean
ChIP H3K9	siC		28.59	2721.15	0.141556	1.41556	0.416022	0.403442	1	1	ChIP H3K9	siC		33.35	100.427	0.335544	3.35544	3.40261
			28.68	2556.58	0.132995	1.32995	0.390862							33.31	103.25	0.344978	3.44978
	siPHF14		29.42	1530.73	0.0950332	0.950332	0.249133	0.2416	0.598847	0.754166		siPHF14		32.69	158.683	0.370882	3.70882	3.81455
			29.51	1438.15	0.0892859	0.892859	0.234067							32.61	167.73	0.392029	3.92029
	PLAT			2^(40-Ct)	/ Input	% Input	/spike in	Mean	/siCTrl			spike in			2^(40-Ct)	/ Input	% Input	Mean
ChiP H3	siC		25.01	32541.7	1.69284	8.4642	1.28556	1.21808	1		ChiP H3	siC		32.17	227.544	0.760266	7.60266	6.58406
			25.17	29125.6	1.51513	7.57567	1.15061							32.62	166.572	0.556547	5.56547
	siPHF14		25.54	22536.9	1.39917	6.99587	0.950461	0.96722	0.794051			siPHF14		32.5	181.019	0.423088	4.23088	7.3605
			25.49	23331.6	1.44852	7.24258	0.983979							31.19	448.822	1.04901	10.4901

## Sheet: Summary
Title: Source Data of histogramms in Figure 7C representing ChIP H3K9 after PHF14 depletion on different promoters
		RRM2	AKAP12	GAPDH human	Actin beta	PLAT
ChiP1	siC	1	1	1	1	1
	siPHF14	0.32	0.52	1.1	1.04	0.89
ChIP 2	siC	1	1	1	1	1
	siPHF14	0.68	0.74	1.42	0.99	0.95
ChIP 3	siC	1	1	1	1	1
	siPHF14	0.53	0.73	0.85	0.79	0.75
Mean	siC	1	1	1	1	1
	siPHF14	0.51	0.663333	1.12333	0.94	0.863333
Error Bars	siC	0	0	0	0	0
	siPHF14	0.104403	0.0717248	0.164958	0.0763763	0.0592546
