# Supplementary material for: Integrated analysis of H2A.Z isoforms function reveals a complex interplay in gene regulation
Source: eLife. 2020 Feb 28;9:e53375. doi: 10.7554/eLife.53375 (PMC7048395; doi:10.7554/eLife.53375)
Supplement: Supplementary file 1. [file elife-53375-supp1.xlsx]

## Sheet: 201811_List_UpZ1
Table S1- Genes upregulated upon H2A.Z.1 depletion in WI38 cells
Gene name	baseMean	log2 Fold Change	pvalue	padj	si.Ctrl.n1 (RPKM)	si.Ctrl.n2 (RPKM)	si.Z1.n1 (RPKM)	si.Z1.n2 (RPKM)	si.Z2.n1 (RPKM)	si.Z2.n2 (RPKM)	si.Z1_2.n1 (RPKM)	si.Z1_2.n2 (RPKM)
A2M	5511.19007662426	0.920741693227776	0.00599166724586917	0.0249652801911215	4.18594564250038	4.57756010190518	7.66447671366725	14.4746283711149	5.20089639021659	3.63777428028658	5.87984761223011	5.71039868563852
ABCA3	66.5806261548985	1.68680234029602	1.90067586011335e-07	2.70027741681019e-06	0.0225986932738057	0.0199193105870065	0.123565072029382	0.0987121064629732	0.0210262711295848	0.0331537872303852	0.0722706226142881	0.0889301828283062
ABCB1	995.448805128118	1.56775695982935	5.53978179706787e-27	6.75004944192279e-25	0.71302199676511	0.635010810899659	2.0476639885914	2.14552709622442	1.08927815251842	1.03444443775598	1.71090825644562	1.8635378247559
ABCB8	1208.29515780576	0.608158548047026	0.000151533406170402	0.00109539781852201	1.51725765290727	1.10193394792012	2.12970541476971	1.95921419647287	1.6159235804369	1.75008767727559	1.7618071110599	2.0125952451989
ABCC5	2564.56916777539	0.93567277587771	6.82449693186375e-10	1.48156213488695e-08	1.51166348087949	1.59148623522918	2.72265460869184	3.40786222507611	1.98996299755836	1.77444874766524	2.44096424220957	2.50373907004382
ABCG1	21.7510729873025	1.28863384535339	0.000350476139605511	0.00227565520315148	0.0110713746132161	0.00548927575663291	0.0857593775611658	0.0570919750283691	0.0150223294165308	0.0238340203273421	0.0358277598166802	0.012850105833356
ABHD12	4609.37987595104	0.402038412228791	0.00123909708180145	0.00672486724105373	10.967193024026	10.4730645769375	16.1192666553493	12.7006504407498	8.46490504994452	9.04792639729739	13.613272507894	13.9135840031854
ABI3BP	195.228879588231	0.78833996690682	0.00710955711129938	0.0287894490809354	0.182920246446055	0.200557576418659	0.25004270328694	0.504790708969648	0.489476727210436	0.48662678957338	0.506166464058354	0.443850067349318
ABL2	11017.3695877234	0.653336856158718	6.95016079507555e-10	1.50401479605435e-08	4.44434202462543	4.3591036461156	7.61789029376074	6.46763063101436	2.92909295766618	3.96470860366826	5.76501650252468	5.85238051891366
ACAA1	1092.58895835123	0.541373613670227	0.00164562269255882	0.00856040266033001	2.99794242223761	2.79520257078361	3.72964686977149	4.87747311249016	3.84294169807231	3.50739806489123	3.75864797296447	3.84678621153799
ACBD3	5038.16739785225	0.484095971957409	3.88831149447956e-06	4.13764067370858e-05	7.65219096662558	7.69905184723469	10.870809455757	10.8571169741331	8.66314350655184	8.90682205234555	10.3126930081554	9.19252956653327
ACE	1318.62405510358	1.56935642699999	6.65566684349223e-22	5.52257018762162e-20	0.88137444082089	0.716629735658756	2.28240111640434	2.74428279344827	1.0258014480673	0.782918467221673	1.28106562269576	1.45822479015234
ACER2	234.026226422977	1.84628676374591	1.26933686351339e-15	5.62878068164545e-14	0.234407824965213	0.178090300479774	0.854462967545425	0.88827483845689	0.26584045078973	0.261098962749156	0.615373032879702	0.735569434721084
ACER3	1319.5517271224	0.374162366270827	0.00454239972036657	0.0200836731670343	0.970940515891434	1.01995260637552	1.39389080372373	1.23335983820102	0.983820403310549	0.99897049638398	1.38846966804734	1.29850816184358
ACTBL2	62.8408742298477	2.45870543893001	1.70771695984434e-12	5.29924695892179e-11	0.0142850055406743	0.0141652391572381	0.364501729379093	0.202575364150857	0.00276896909431401	0.0136676438845253	0.0788583340358505	0.0734258910628233
ACVR1B	1622.04646722465	0.477099734659292	7.47370843629496e-05	0.000592508245022798	1.8681649122415	1.80447426808127	2.62745989570367	2.55636777893672	1.92165187882649	1.84899451942176	2.29808604851134	2.22337305476347
ACVR2B	740.516077313764	1.00400850741689	9.65115424494391e-10	2.02689225408178e-08	0.268468422515543	0.283617407344926	0.540480001471519	0.614231647073746	0.382981561828543	0.363473641668567	0.450925437666683	0.47714760339631
ADAM12	1976.0318703854	1.69491031135408	6.91933895159788e-44	2.22819188858003e-41	0.693340654119949	0.637706798877314	2.22924905854917	2.24641330598378	0.735820152409797	0.652693845114837	1.2020807800534	1.26254410648138
ADAM8	194.987025678158	0.784397780345294	0.000687602390819841	0.00406816375146034	0.293206121752686	0.251781654744559	0.495832458073672	0.509801009085315	0.274210984245096	0.266073956772907	0.384367756316892	0.475134706904049
ADAMTS13	61.6940198806311	0.896652634375827	0.00560735509651547	0.0237146584366391	0.0531455465787537	0.0388975976274498	0.103781811178821	0.112271120706195	0.105959287571802	0.0908013054340966	0.121399615388861	0.1095204473775
ADAMTS14	151.596482369425	1.51679450619537	7.00801116703329e-07	8.78436988268074e-06	0.0878730665237041	0.0580908888108327	0.19774532334476	0.367731639596553	0.236377595330207	0.17158248118873	0.218478579336291	0.264046117887777
ADAMTS17	32.1559765720683	1.05335024393917	0.00322439670190138	0.0150795177708216	0.0156937344607754	0.012449725764493	0.0629274488312646	0.0423682871231637	0.0255530815727871	0.0150154911188124	0.0238993161258872	0.0447570924315301
ADAMTS7	303.7559677605	0.78239114276633	0.00320272695322351	0.0149989203747742	0.281886981844462	0.217407262868793	0.335924544847522	0.602383009153281	0.362867332347693	0.30773979845974	0.386621426945651	0.456606938806944
ADAMTS8	1931.98034314973	0.857898249480342	5.54412827412339e-06	5.72836783097929e-05	2.48954497670268	1.87431676445948	3.41101436090658	4.83580220204938	5.34342984267236	3.60029484553958	5.07516155493628	5.28005788082623
ADAMTSL4	998.58188484533	0.685622356475085	4.30948998666098e-05	0.000365325760893078	1.26587536039356	0.965127310374045	2.07070725251256	1.64135251152491	1.74254944615905	1.65806879840928	2.38477126273865	2.62497265950448
ADAMTSL5	956.331751197874	0.611411858393787	5.87796430399557e-05	0.000478336144473767	1.8999207369155	1.53074324175297	2.85807794462503	2.51078502154734	2.34234238600947	1.99825546149733	2.94117515283164	3.55559324953229
ADD1	22884.1644762017	0.355932304984058	0.000260636252450539	0.00176431697417094	26.3403714264326	25.8881298207034	33.5029713659231	33.9303296106815	25.0414625888873	25.399909075861	34.8819908044504	35.2153731010662
ADGRE5	1628.24815004461	0.493241172121143	0.000148736208667099	0.00107582056630568	2.73739895836605	2.30643113252671	3.72365790070113	3.48089475535981	1.83664324440051	2.083247173839	2.75880510087628	2.92419024912577
ADM2	248.690214994008	1.23186699178904	1.37613686882011e-07	2.02527216004265e-06	0.237573246908595	0.20940570479007	0.509678000119694	0.659091052608702	0.623601782264841	0.45461186920671	0.48427115507932	0.464493718919263
AEN	4065.3633361303	0.581100191178423	1.57178858964095e-07	2.2639446938119e-06	6.95839536340176	6.63861782476967	11.1182260323519	9.56678715975486	5.81478888933257	5.87946204016727	9.66279186765423	9.77379214641486
AFAP1L2	57.9525752096901	1.46589649846068	9.0002094652336e-06	8.95057595715327e-05	0.0336042985764383	0.0349093465045751	0.142180914877953	0.155085431395515	0.0223329313914266	0.018372574940276	0.0182766239990847	0.0302473624198673
AFG3L1P	715.044418943792	0.725540839339948	1.40433308822044e-06	1.65449521064298e-05	0.925458274660078	0.855167186433238	1.59820887017596	1.43464550066295	0.824592327491047	0.927044803232439	1.22052025568922	1.14789998701735
AGAP11	96.312617870965	0.753005882779502	0.00937222067447313	0.0359907111363569	0.154968539504878	0.119172089683224	0.288209710178058	0.240794066674256	0.144676221654925	0.163400906396326	0.279340963925409	0.26639022885282
AGAP5	188.152409007723	0.590499479177012	0.0106054537800411	0.0397924377207048	0.419523408803142	0.367064204295043	0.629689508585234	0.620064711208862	0.436892189605659	0.428939228612597	0.507341302811197	0.504655331110054
AGAP6	369.436876172915	0.519244390258944	0.00513175114064299	0.0221818261991679	0.712719740725786	0.699605422821371	1.02017607747208	1.06349916792856	0.672617754521183	0.72324615555613	0.923661148987511	0.904815262295667
AGAP9	184.813737563919	0.575991061242448	0.012911698912084	0.0464566980010471	0.405476919943703	0.384115156440437	0.617121344654827	0.625123641531299	0.398654988223772	0.507938774685504	0.534727924674688	0.565576924529694
AGPAT3	4390.17533710361	1.00765300459551	3.8015048307824e-18	2.16942417030937e-16	3.08446210080783	2.62593613149255	6.19822040918601	5.552868884174	5.39412776289265	4.794370203032	5.55823274378702	5.79470943647754
AGT	102.563017194013	1.83802592744675	1.78295162195922e-09	3.58312343046039e-08	0.10039860124775	0.0663712353804441	0.376529702052863	0.496643517064075	0.140718066380467	0.0406406121465751	0.158773219894216	0.163908470691723
AHSA1	2454.6255290606	0.34428474613119	0.0019292786980743	0.00982805815120711	9.61367119063986	9.12791958608828	12.3051575921434	11.7370592987585	9.20571538640633	9.45810032269897	10.7102849151386	9.56637477131224
AK3	4271.10134731037	1.01703933042594	2.03996444877734e-20	1.40767954947518e-18	3.85349768947153	4.04453844056996	8.58347692811373	7.79205387965339	7.67289363768265	6.98353468748283	8.53126472856282	8.18563140423789
AKAP12	8655.23878764761	0.884012963714544	7.87606765431025e-20	5.15803113260053e-18	4.54353767600438	4.44504162758001	8.63169394742378	8.23248376469002	2.19307895877457	2.52164531523804	8.41776269925221	7.93067574240914
AKAP6	385.073221584484	1.08987765006747	0.00255518148564339	0.0124178331273183	0.0816536527836416	0.0965278246399207	0.221481961884835	0.564431070577437	0.218233791981074	0.194852415683862	0.299895346542024	0.344683954631797
AKTIP	981.38683686445	0.416211384745493	0.0042924214520156	0.0192235099796394	2.04250547760365	2.29858412515982	2.9947927226242	2.91581911808641	1.6884117116421	1.87819336166882	2.24206137552643	2.26918744647453
ALDH1L2	6234.09059768401	0.740005253868338	3.11124946899512e-06	3.37176675225633e-05	3.7998484226996	4.16128216705393	5.85938101313436	7.82031664089334	6.42296741030695	5.99099931258203	6.30462120748117	6.37904036766998
ALDH4A1	758.566549392197	0.741020398246663	2.12111010372708e-06	2.4250223290709e-05	1.1284895084935	0.919168827350661	1.80793846566764	1.70986957744312	1.10614013419459	1.28233300498659	1.72277162476757	1.61148436962958
ALG10B	824.049433167577	0.43597820098063	0.0051661324558683	0.0222805935795978	0.41501032351573	0.483884325884023	0.649888006393167	0.597591291625488	0.267252519161271	0.331685252994771	0.401222876840896	0.314664319783743
ALG11	469.843399090818	0.456383537669872	0.00776489653467005	0.0309155801093354	0.972522063368519	1.02351630446515	1.40737913971881	1.40184660665633	0.950096448185851	0.971433783673287	1.24701227411018	1.17649857852059
ALG5	1245.49565805747	0.489652110491933	0.000195137559378569	0.00137266450177972	5.43735241605641	5.65550774024955	7.96107450139903	7.88492751476862	5.75294532882197	5.24171607809155	6.58290999079713	6.62326023748763
ALG9	2016.46254177447	0.418171028757731	0.000478781429333968	0.00295956070920563	1.68122727137146	1.68841007797653	2.43662823886366	2.13936247553709	2.03946434871642	1.89647838130883	2.17953444026319	2.22314542908557
ALKBH1	458.556098630439	0.528437728437548	0.00191273398946216	0.00974744808118904	0.972717696433491	0.903320314937746	1.44925444437931	1.33362767780243	1.21808717885955	1.13749693231296	1.32553743171575	1.43620438175785
ALS2CL	191.597004815306	1.04193110114222	5.40619002524416e-05	0.000446117877311942	0.140065516122854	0.0999595743474693	0.33505930423723	0.230781531084645	0.178942805739263	0.121829309342363	0.26783665079099	0.267076812818172
AMDHD2	836.451843690438	1.06152705370363	6.41338864256686e-08	9.98171247303991e-07	1.80473033477695	1.16151881689536	3.69255533765824	2.9201212837568	2.53959010234025	2.0504971874567	2.84414227196401	3.45852218000972
AMIGO2	1058.86447449296	1.36995427404323	5.36728805087728e-13	1.78799435685013e-11	0.835925912053479	1.01173006801763	2.20018315273312	2.96466317466925	0.851778625041334	0.790134068803463	1.14415783216138	0.988232006445259
AMMECR1	1653.02499128537	1.05857685636768	1.77675764679175e-17	9.49827951496379e-16	1.1824366783668	1.15465603702681	2.66617645654239	2.35137832388715	1.77073768852921	1.87639952312998	2.6765854398424	2.69552016879179
ANGPTL4	533.538783601544	0.781478361368917	9.3840030453429e-06	9.29126216605144e-05	1.40373987779693	1.22922797575588	2.63960002358693	2.09566200247043	1.21428524682651	1.13760355932199	1.98614231654432	2.05655657032734
ANK1	1109.16440905571	0.546472283016028	0.000264963020115655	0.00178823595162886	0.623562578891648	0.635392097036221	0.872953084075089	1.00020823713261	0.759395666491398	0.73650943490918	1.16898634066233	1.16654758849647
ANKDD1B	107.569106784984	1.53246710278495	7.73844914435764e-08	1.18664993965348e-06	0.113387231479102	0.118898458558312	0.41688201946151	0.456616376090547	0.145514099990847	0.0972641381609968	0.39297892740101	0.365638885223019
ANKH	1875.06018438438	0.880952862807267	1.14114744847236e-10	2.76595326892269e-09	0.983582768790089	1.08665409474833	1.88131372885194	2.03870798750412	1.28014701158025	1.17256293985228	1.68115366822199	1.6304618871023
ANKRD1	1187.46614312883	1.83934991544581	4.19457261055797e-23	3.83321584849976e-21	1.7085054777682	1.48700327603587	5.25589243279145	7.29539334847021	1.91648851500103	2.50520157711783	4.38381862579627	3.94587431682771
ANKRD10	4168.63025144831	0.516945765699558	1.01771459348268e-06	1.22788491318941e-05	7.36346572841607	7.07581538188871	10.447420407869	10.458055684391	7.67650740667383	7.23339628403375	8.6703383038946	8.70898796301078
ANKRD11	5478.33046769875	0.488847170648717	0.0040946721848468	0.0184786257257434	3.04220374879407	2.7381637202566	3.393288850833	4.87381950124542	3.55786512734552	3.19506584201162	3.3011975276889	3.52513011553028
ANKRD13D	925.079479950218	0.391894164903946	0.0107999123490798	0.0403854597025596	2.55477317690113	2.02494488841465	3.06694622815038	3.02272649854241	2.54145882206236	2.25988219040437	2.5692342113496	2.80755342601505
ANKRD24	37.3572776695803	0.91145928872387	0.00956321150876247	0.0366201686455301	0.0396545508997954	0.0245763029094158	0.092601507849187	0.0872078625601363	0.0576490286848983	0.0260842875774342	0.0415168994339865	0.0558880658574425
ANKRD44	576.610211366649	0.562393109756681	0.00120893004340801	0.00660370712322023	0.433223970172908	0.496076237390339	0.678204507255796	0.735910678637728	0.397081932701027	0.455951243608157	0.540749728912477	0.490511792990734
ANKRD46	676.839553473094	0.857867478146342	1.56470729381403e-08	2.7096883673284e-07	0.714689486669755	0.707937895120553	1.3926429932792	1.27913880127175	0.855255603815387	0.787142338253351	1.37708553048875	1.10499960053646
ANO1	400.572534506072	1.49893198816683	2.23309760736345e-08	3.78954142278428e-07	0.238182529254189	0.226425856767484	0.530979057291546	1.06523145544269	0.434977786567628	0.33524150070915	0.707449932039854	0.671049815574603
ANO2	27.8109372749583	1.29914885102283	0.000313638442955009	0.00206924875169097	0.0158214741598748	0.012202420165489	0.0937176632897969	0.0719884470912913	0.0143117065397974	0.027752468759712	0.0622424340615765	0.0682067588961298
AP3M1	3385.72402100033	0.428409312876346	6.02995596365469e-05	0.000488939774630874	3.28934135241827	3.2958302286996	4.61973625095477	4.35355118978944	4.17841411392659	4.33218369479336	4.55296909270729	4.19405677610742
AP5Z1	1599.72229169931	0.581523595391264	0.000728509333408624	0.00427280517534763	1.80795005801069	1.19758511692136	2.40052995667033	2.21560529589806	2.561077162468	2.01523453164381	2.28657389067817	2.7771036839422
APH1B	3246.08744556019	0.432323652795213	0.00047758621115676	0.00295352240781673	4.23824326621912	4.32934932908219	6.49284306468316	5.2824934382713	3.14773870786305	3.26500878351798	5.12062882840009	4.93533858444208
APOL2	2551.01334018197	0.390067800924139	0.00107999026255318	0.00603091176756061	5.19811637491769	5.18551467815411	7.48005716867054	6.34647745318386	6.29429089982084	5.9288417147735	7.57563423631427	7.21551083584184
AQP1	70.5266585933119	1.09052925710747	0.000865319177993295	0.00499080677286111	0.0993013777401061	0.0656458858358714	0.190347974510357	0.27836630845971	0.0769933046794397	0.101562226099371	0.213796359954153	0.140804351152731
AREG	724.055094381426	3.04586805745965	8.16738555061132e-58	6.136882754001e-55	0.625584725401944	0.739238242340808	6.14990056060313	7.36041877926736	0.357722162477498	0.314237984827836	0.845500116529446	0.917986988432261
ARF4	14018.9500717948	0.361347742139066	0.000471178950714993	0.00293026726596968	45.1077866251072	46.8677045644072	59.2457048444291	60.0959335663856	53.4974504499682	53.9012914165639	61.8898146331324	55.2472576021233
ARFRP1	1729.51722844139	0.573389483988888	0.000277424926557891	0.00186027373906568	3.87186664382323	2.86290868513273	5.64956754537109	4.62662976710863	3.26523667450489	3.21916187907047	4.28589429084003	4.67328325547397
ARHGAP1	5544.96211654543	0.444811010757251	9.70012713261396e-05	0.000739122363203402	8.93567721367292	8.82247624532477	11.7343713684433	12.7006059961735	8.83882737090368	8.98722547238478	10.7900807216707	10.957978090784
ARHGAP18	4681.6889001434	0.496547990969754	0.000110810147151637	0.000831229750541256	7.06079368177155	7.3484704984448	11.6501835737284	9.11128360863857	5.93227452404811	7.2003815889016	9.98391847909031	9.75932301845105
ARHGAP22	2690.05366674386	0.476085437818879	0.00190805971200908	0.00972729272707228	4.17924799882751	2.96405929444309	5.31998052370373	4.7997467843843	2.80417426886193	3.01062466080461	4.24664072389571	4.64716220613158
ARHGAP25	98.7357456717547	0.814021522659254	0.00406196647264415	0.0183616632829252	0.134562155680858	0.117963371959578	0.261247611521412	0.246680318233747	0.142890494845893	0.11475251227997	0.280649858442938	0.259978247892084
ARHGAP39	128.416810261833	0.714330414258843	0.0131927237187613	0.0472224324755865	0.140109611269813	0.0863649524404587	0.181170155102915	0.231454620216654	0.223140027841751	0.128619790699659	0.211925258382101	0.249894325679599
ARHGAP4	26.2412794030405	0.902196549571399	0.0122573349843938	0.0446685580053454	0.0266318764328141	0.0215181129032501	0.0782020979618666	0.078091382265816	0.0344150340280843	0.0339745525029926	0.0337971200908342	0.0529895378448443
ARHGDIA	7118.15394347966	0.594614356997258	2.1744808974721e-05	0.00019898412813471	17.8155998330373	13.1205597073063	23.6372616612431	23.9151088034166	12.2250985225727	12.7451639906063	18.5123540846427	21.0563981264348
ARHGEF17	5406.2433637015	0.422390370891555	0.00634000620551965	0.0261667939974529	4.23873486145711	3.45221908318544	4.59015186337237	5.85275810906522	3.80141074548596	3.61687876486486	4.40024401622915	4.86785133566017
ARHGEF3	94.0715279058145	1.45310759790177	4.97751972685544e-06	5.19852929001698e-05	0.052132060450162	0.0523842484082997	0.150125034928589	0.258709745899268	0.171383273322553	0.123700032122704	0.187359650235633	0.146601311900293
ARHGEF37	193.480271210962	0.864410956194438	0.00020837120717871	0.00144895659490594	0.168181348890689	0.180329948657348	0.377551758260181	0.319158153673719	0.214681901887832	0.213896519756251	0.306090061438485	0.319667843470074
ARID3A	1267.90187968365	1.14688762516068	3.12765853897715e-15	1.34290735681479e-13	1.98141160660137	1.61268475249449	4.45266566050462	3.82163067971193	2.32094989485401	2.06225533693165	3.26344991597095	4.00365397049935
ARID5A	453.316338393093	0.838977843708463	2.15471492448728e-06	2.45928433364476e-05	0.802346204756128	0.670610086487648	1.42692392694302	1.3198318311872	0.959183449284334	0.659452923982104	1.30528955340541	1.42998963781395
ARL4C	3283.93215325912	0.548220229785451	2.48789786477295e-05	0.000223431730551489	4.80877141786479	3.83974816378583	6.81806284962827	6.04362357348862	4.4475715652697	5.35270640917445	6.02998565153157	6.0323769938411
ARL5B	2349.12280100777	1.00364208570163	3.97061859762879e-18	2.25641245936678e-16	2.84690727306906	2.78444239254503	5.76135948559814	5.78777932470952	2.7246964494246	2.76643165881152	4.29732877423562	3.74867555224145
ARL6	515.966006522131	0.456051039152078	0.011693115072059	0.0430104382239865	0.507938294094715	0.617156953905946	0.85441421293903	0.745412124666171	0.636665665322125	0.662708851590064	0.658865675866563	0.561914185264237
ARMC5	399.041310406113	0.527597276116169	0.0134291321304494	0.0479738542166743	0.506421005305555	0.328244687732492	0.620142273295896	0.624064796777655	0.498485802159366	0.331224944356594	0.492548132242107	0.583846749476479
ARMC7	358.105944758262	0.667402077822616	0.000410995250660404	0.00260117490181655	0.622303841654266	0.628773649730213	1.12454383709606	0.958852782547213	0.84438054289515	0.747644821044771	0.977294866229727	0.973206544732108
ARPC1B	5706.57665625172	0.331845309876232	0.0127864886486057	0.0461043079105285	23.9578110625159	19.1080995907477	30.1833501775247	24.7692377650634	21.9310310116838	21.3946700118959	23.4676782419778	26.0346417561503
ARPC5L	1089.65476866545	0.458137058575598	0.00101351200036579	0.00570205898708291	2.29349194852053	2.43792632057403	3.26323413494658	3.34993226243275	2.33108504723328	2.25122209467428	2.61798744489565	2.74275025897665
ARRDC1-AS1	297.487560693534	0.599294213897241	0.00484140100918782	0.0211840662081091	1.11082791952602	0.845348466521468	1.70677976910948	1.40267146491268	1.29692777296049	1.24819647195784	1.32281709283939	1.56771291166943
ARRDC4	1125.36524852923	1.47253685996315	1.73308673092713e-14	6.81395291738063e-13	0.819443695016911	0.979629441685733	2.28052045321861	3.15918417808152	1.55224581116373	1.39669911623748	2.46216548858641	2.81016680076616
ARSG	209.774006081239	0.864707729567536	0.000139685603627602	0.00101681797043236	0.350846567164592	0.303837074829896	0.623466311337186	0.657703732553328	0.486931588348414	0.466600578837689	0.531617766064517	0.472367902372786
ARSK	2363.1907985535	0.464071029828171	0.00018732164631908	0.00132437285230819	3.90770703883735	3.82367304634389	5.1730971975163	5.6209115127882	6.25627251178883	6.12767872852704	6.8026277507553	6.14298445006689
ARVCF	606.821310158042	1.39734769009234	6.49122743838273e-12	1.81767807668999e-10	0.630428511989856	0.390612202307246	1.47344714987636	1.45786237114431	0.922015939399387	0.603182992963809	1.34972098405173	1.62657633006564
ASAH1	4257.34297757356	0.517539329876056	1.72205150548429e-06	2.00264373273216e-05	7.32395342532117	7.48106811156159	10.7113901668201	10.7591385591255	11.4200684985509	9.92822712218176	11.8960681738677	11.8965728907525
ASB1	5800.62254261424	0.436871928503518	0.000220600364988206	0.00152474090214651	4.6675384820071	4.6499463725993	6.04969332023856	6.70357905287533	4.22756475768038	4.88843021274119	5.99757708736224	5.82827833546504
ASPN	50.2762307728896	1.61445533077272	3.04033207265155e-06	3.30816502675883e-05	0.0435378183545304	0.0313983960375433	0.274125046832585	0.177688897710036	0.098202296225477	0.0946732373397553	0.238084020276534	0.165379485824369
ASXL2	2733.45312112007	0.517454536107537	0.00913528876065343	0.0352610674908212	2.05848244045697	1.9704247838028	2.24473542886597	3.68614476272859	1.93466411642417	1.8657210277647	1.99100558701822	2.23883628821311
ATAD1	3956.95929328897	0.883455820221166	1.20402073961738e-16	5.9432045632573e-15	3.65195962074837	3.72322743345905	7.20483885991079	6.67945310347315	4.71818851374781	4.11131703729187	6.04014828757903	5.72288454156338
ATAD3A	1135.42983363064	0.513841773208056	0.00168499800449963	0.00874169467236574	2.5131813301403	1.81180322386321	3.31067428427229	2.99867914827841	2.709290757204	2.40796910273081	2.53343308523287	3.13090287906976
ATAD3B	588.078598778518	0.467998942361833	0.009911248098529	0.0376711537423816	1.23017379906095	0.905803861364732	1.62538047127397	1.40565747660426	1.331205252088	1.2184752471688	1.40376502032075	1.45268879360012
ATF3	695.480060472178	0.770115254622324	0.000378643215583506	0.00242363913429575	1.01937125981999	1.51623718075403	2.00796667667511	2.6033310509664	1.97896317164369	2.31825258882699	1.66281299654447	3.44801916406305
ATF4	16084.3287544587	0.369112839285006	0.000479221310583096	0.00296092655351137	43.9586689617848	46.320397268095	58.2186316081381	59.5995427469803	59.6401300065593	53.4802532174081	58.1007808767139	62.1818966880023
ATOH8	199.571672614829	0.645003960278064	0.00836637062413583	0.0327795952176817	0.171889086369821	0.163135008805841	0.240391870236781	0.315938790686583	0.32592792315023	0.219823409381038	0.299342297419906	0.247194130379508
ATP10D	5557.94366805122	0.33053085705784	0.00200034909713959	0.0101328545089187	4.77881306460994	5.02324322870617	6.28736963005453	6.17033825529074	4.91238199119482	4.84921640700233	5.73821230144846	5.59835950498506
ATP11A	3945.54167261731	0.438025857861292	8.84229607214875e-05	0.000682992886212518	2.58494717031613	2.35171711075109	3.32914274720877	3.42594659195898	2.41836601127645	2.20693398323985	3.03732103798138	3.15756341390779
ATP13A1	2293.78380075708	0.651333163764478	3.37531881812698e-06	3.64335091900777e-05	3.39833035795339	2.59651693194861	4.92067732935874	4.68263402495176	3.01931715100055	2.87344349938807	3.89317633046342	4.25087753089302
ATP13A2	1569.10830753656	0.797829658944253	9.19296388613903e-09	1.65338878404296e-07	2.03760222905516	1.63437524271983	3.28609006929007	3.24322922041207	2.30754506872861	1.90228060617313	3.06536532974352	3.33183523799474
ATP6AP1L	164.843795051403	1.42959688420564	9.78025197243326e-07	1.18741389521687e-05	0.225421162667747	0.188384799641706	0.511627518758542	0.909562470751064	0.369346956839512	0.292997931048826	0.463109864146629	0.504939047846514
ATP6V0A1	1967.70503259594	0.323455565514484	0.00619521721972263	0.02568679120072	2.87999752957543	2.60458725031427	3.53143821953527	3.39841601613656	2.78149566827012	2.70505533998773	3.24828580366026	3.35422968019998
ATP6V0B	2159.21243633476	0.537836974572829	1.73663031818274e-05	0.000161947989574003	5.60663672249859	5.451180855327	8.96110606081621	7.42188976529425	5.0766102632445	5.19352292553604	6.78933806488554	6.72660786643272
ATP6V0C	1090.96692464403	0.509523781309486	0.00316003262875566	0.0148297853240529	5.33352904270182	4.15281622111096	6.19004687768209	7.56063880011596	5.5682686348244	5.37446509550387	6.30766826445228	6.67694004402071
ATP6V1B2	3492.44100556184	0.419457104001916	0.000367005148958776	0.00236368792365116	6.75913057663338	6.03503251214549	9.3797869113698	7.9784347100256	7.12906751540242	7.33263257368958	8.18413473181985	8.00049953198958
ATP9A	13754.0006827525	0.52306634344147	7.00877460438209e-05	0.000559254728756742	9.67828897987409	9.55690327170001	12.6898996300216	15.3519776253748	8.10495272912151	7.6592735744135	10.359719214719	10.3096051800857
ATXN3	1719.89931231317	0.663431754271746	6.75882844821759e-08	1.04711517482409e-06	1.18806756780307	1.24844841796453	2.01895786890072	1.92076655223471	1.59975077498412	1.53855296582796	1.86935117273486	1.68716626130535
ATXN7L3	3088.61521244043	0.325656468053109	0.0043780869568576	0.0195618189928969	5.22095805644009	4.67981769592551	6.65747683405853	5.89262909909208	5.23187746082198	5.22250165297593	5.72867731744417	5.57953799785041
AUP1	4473.94901749688	0.4357163714149	6.22636877419493e-05	0.000503357069163099	12.9960398144065	12.9267752380024	19.0234847680579	16.5463547461488	12.1816470148538	12.3694394302837	15.7160039422535	14.4788281695288
AVIL	255.614574603491	0.850552194064186	0.000229179767208758	0.00157263133003473	0.343152542947107	0.41405695618257	0.661862292365164	0.815545379414992	0.612203811998219	0.420762638210685	0.636726457997096	0.614273673509709
AXIN2	109.010685058413	0.955463022676657	0.000709133385467728	0.0041718264630061	0.113172888886514	0.0950787007925614	0.217011968801486	0.250318996344534	0.292495260851167	0.20979607291132	0.186708324675716	0.223616740098654
B3GALT5	80.0298434918475	0.979620910795226	0.00236902513375381	0.011655534715904	0.119458180686996	0.0767774491290497	0.317514704819542	0.189232551280966	0.0102913197865159	0.022224125298765	0.154124758357696	0.176063970846115
B3GAT3	1059.79703504336	0.407564952098242	0.00973674456475791	0.0371367433505316	2.88035810771559	2.22528522438375	3.73358232976312	3.16755232579004	2.64660953111314	2.53376093927532	2.85768993393979	3.0023904105557
BAG1	1066.29852693665	0.640240862301659	2.23346598917208e-06	2.53419693821749e-05	1.39121126772191	1.39657871281371	2.21632002070104	2.22021565326098	1.6759419586733	1.57511920291372	1.9047927733342	1.92570763651149
BAIAP2	512.864459987082	0.564429045407755	0.00124271226811722	0.00673654646344106	0.599051348341298	0.491656542949527	0.89314700169341	0.769503626535159	0.759905315788426	0.789559719747411	1.00690986217608	0.98922460630152
BAX	2984.14824610822	0.389240051285031	0.000440989578105719	0.00276641189419288	13.5028987507313	12.3383285439584	17.2523436764349	16.9287259890027	14.4058958990938	13.197330308833	18.0071677400196	17.4040651788046
BAZ2B	3060.81816818465	0.501612464536193	0.000333714369966962	0.00218148228796673	1.44103707389647	1.53245094516	1.9579012428935	2.31971454065378	1.7084944966641	1.5842347965166	1.61323452852171	1.66133345122075
BBC3	587.650601394384	1.05603509595434	1.44672373330713e-08	2.52802822906704e-07	1.35263660578794	0.954020405426647	2.69101200037852	2.38091890581596	2.53698103065187	1.44455905169884	2.13965614887233	2.97248402789108
BBS10	1282.5328060235	0.355238211039553	0.00531757741463987	0.0227595678901912	2.04128662554508	2.04718476901663	2.76115037551105	2.54690022525271	1.98432687075154	2.1262589182713	2.79264009195772	2.36416125184155
BCAP31	5038.74629305507	0.509644465280654	5.25051916253113e-07	6.76316873078415e-06	11.3690102214272	11.2406552665787	16.6452294398716	15.9445690504585	9.82238394566762	9.64247712566153	13.7175231937024	12.9124524445049
BCL9L	1781.78355261077	0.446059403404485	0.0101815197390189	0.0385468932450822	1.45177852342697	1.07991812650525	1.54977239613894	1.95471222293958	1.44353346606762	1.3150201969326	1.53051387231142	1.74103242931995
BEND7	424.585563234326	0.885354844016321	7.22304641137547e-06	7.30132307278425e-05	0.535346049594935	0.673698896406063	1.31369693315599	1.08292588579812	0.445086275893141	0.539980161388061	1.00924710960841	1.06731882598093
BET1L	2046.55121316917	0.451544560398118	0.000197153121223819	0.00138393589133579	4.07089313342834	3.55476101607352	5.3432237518865	5.20869264643385	3.94153195946113	3.82713679472564	4.76006139667421	4.70365604305774
BEX4	820.209055898918	0.487858602243322	0.000714327469855119	0.0041987305648807	3.51022811461982	3.40619123399948	4.91533567456286	4.95559535172858	5.37692760352293	4.87023355045629	5.35742878873889	5.02271745909947
BICD1	642.532487561255	0.788554853512823	0.000127208072119729	0.000938619299192218	0.767330475944396	0.893227064539199	1.25412178776213	1.76762137033238	0.605727612569867	0.686287853820551	0.853115022668451	0.9901813927957
BLOC1S6	4850.24975754957	0.427472986107597	3.44138527702774e-05	0.000298051075883141	5.91244498792245	5.98219851099654	8.29464430455478	7.89296036160093	6.69540880764194	6.94373747810832	8.03672104562798	7.14921435185557
BMF	1391.07597256931	2.25206857381998	2.11793379818587e-28	2.80833868828077e-26	0.51592733167883	0.647614649302094	2.59446960297016	3.85483139720263	0.652670998273787	0.385711096063387	0.892243970398023	1.06256145168616
BMP10	76.0343223876106	1.62692784996333	5.89126462772522e-07	7.50983544674681e-06	0.0194725835813843	0.0343276874985186	0.119781155447314	0.150129752908334	0.0729739762029232	0.0263939563029429	0.0679569999679743	0.0753368540075595
BMP2	876.885999517391	0.723839224917906	1.77930310354883e-05	0.000165250044561362	1.34302070574679	1.34426553146043	2.04269656530796	2.52752158001081	1.37130372934502	0.853636125970136	0.916992218588392	1.07683074870516
BMP4	802.923756993369	0.642931286681208	5.6681447264517e-05	0.000464334690643606	2.07369574969301	2.04122679768309	3.05872806288107	3.52040088981029	4.54440731444992	3.46849452039571	3.57488350827464	3.63844739508179
BMS1P20	1061.65649109072	0.353850818232771	0.0100154129232946	0.0380266919934963	3.07132236356522	2.96848987036446	3.82530673161392	3.98243955421548	3.82016118944145	4.21561518496606	3.81201935842233	3.47837859816832
BMS1P5	329.188459559579	0.611966205166377	0.0026617008132715	0.0128340475934036	0.39827465908295	0.38948274095933	0.571266497573764	0.678401473048813	0.332556196554424	0.333711310697793	0.486288992354675	0.462652369682756
BORCS5	763.350515989638	0.54216235785762	0.000794483695530962	0.00462366264288135	0.675688117436399	0.582539290170411	0.879648953158526	0.986078855360892	0.760492242033611	0.741821021713805	0.802554249926045	0.823998750871323
BRAP	1404.07177639666	0.511000124997359	4.4875154414178e-05	0.00037860195336797	1.84925696850358	1.87788042029718	2.77341504816177	2.63075164504848	2.27724518920264	2.14780453965153	2.47542969878387	2.3431225561127
BRD1	1929.02272152958	0.509688368449427	0.000220622398927965	0.00152474090214651	2.43061079155539	1.92125996327815	3.14684816356195	3.13921498356394	2.51005711014241	2.43582987039253	2.76493657488346	3.15186489195222
BRD3	1635.24188860714	0.755811944157411	5.10695820400369e-07	6.59709739342407e-06	1.48210291425462	1.30637944031768	2.19297413096078	2.62547991557205	1.67223719132338	1.59085917460286	2.00624982847777	1.99180061030816
BRMS1L	524.216228895181	0.598885180285698	0.00123772403796109	0.00672297896121436	0.919033349883251	1.14618018022382	1.57649819177273	1.67500054104157	1.33233062849591	1.24877517323113	1.52304681305933	1.36248916262495
BRPF1	1096.72596467422	0.391208044837808	0.00547840637127266	0.023297667245596	1.41583652073443	1.18871903662304	1.74777345960747	1.71025286012073	1.35510899124108	1.35263779947336	1.62988354857926	1.54090353297289
BSG	13914.203285982	0.480395490694451	0.0012162912621509	0.00662785629354992	37.0954081364957	26.1147568584686	48.3287544347738	41.5283932065979	40.8892288042243	39.4770801203604	46.3005109671388	49.6958092315023
BTBD10	3307.07001088126	0.406573619970751	0.000170261968289318	0.00121455333392037	6.36862163940804	6.32087034992614	8.56710267912119	8.44103167021368	5.75604046476456	5.87448150496474	8.05781637792749	7.74342012312996
BTBD11	272.422970966364	0.74391500585847	0.000460761188408205	0.00287577068445822	0.197502103757205	0.236577786599237	0.387656931439971	0.387108100806116	0.236898399012336	0.242264826256325	0.248068917460492	0.279893609549075
BTBD19	448.245963513401	0.81429344720677	9.01091529883218e-06	8.95463845824432e-05	1.40277027850228	1.24204757726629	2.27903845057913	2.55499352978445	1.34355242004908	0.959543372791263	1.74473977564087	1.86494109119021
BTG2	569.69736437245	1.91127411433788	4.69662942281015e-26	5.38321296131418e-24	0.53368538313292	0.537726969345656	2.0527207709126	2.38586808666992	1.19857242817986	0.799385754521722	1.85806119196833	2.2067485325626
C11orf65	34.1821350894093	0.887807130124411	0.0123980707335317	0.0450486039783861	0.056622123159804	0.0873403995703855	0.223598762855354	0.198473066516172	0.131705857841652	0.120389019588158	0.177245224506635	0.267048857671761
C11orf95	2192.4929422431	1.1322445596689	6.91657813958013e-18	3.865566914786e-16	1.55337663304728	1.60593767708809	3.38992601882497	3.75058806281952	1.96115138016148	1.69318895750762	2.60512221955338	2.7730284369891
C11orf96	59.246602608518	1.52849051208822	6.01383209301937e-06	6.17593614715922e-05	0.12773139931682	0.0745061713202622	0.417676203104805	0.54927570610961	0.15146761361999	0.0934556026305964	0.0915372601978256	0.22424789359038
C12orf49	3036.35936836857	0.445821186336962	0.000160471286863817	0.0011507816303463	3.3461908251582	2.99944510839888	4.72395809936999	4.04861741312309	3.02101663085393	3.34266339904775	4.57899622000957	4.51635692005501
C14orf1	370.969067840506	1.22534328321078	5.39398223845413e-10	1.19010782667361e-08	1.00428690738634	0.792410223807879	2.46219988344227	2.07939200760077	2.69772747518745	2.95704356743092	2.83676346944236	2.72447276340848
C15orf52	2322.3204962399	0.569727556352798	0.00275655039054453	0.0132113196428472	2.52683030286225	1.99361935769259	2.77040839984589	4.12103596010652	2.28594902352807	2.13446545161048	2.79400861580361	3.03621441866188
C16orf72	6184.74115370484	0.523274051415176	1.51170079935737e-06	1.7732656818134e-05	8.07474388336729	8.52095442637855	12.0318499911937	12.144890662216	8.74366396679104	7.98010068273735	9.659769023696	9.02276688493779
C16orf87	1147.41046548542	0.58374377413087	0.00448863919831903	0.0199529573789596	4.04029122725247	4.44998478736643	5.1349571757975	8.05810695691708	3.90461081370956	3.8311651016661	4.93321630627964	4.43579520995902
C17orf58	553.454865741413	0.429602358369408	0.0079391780241307	0.0314889685561196	1.98796923849951	1.91233140753691	2.86261626025928	2.52032911924687	2.21819178967529	2.34098985522536	2.7120397582366	2.5440091388987
C19orf25	730.032239212771	0.620484036988755	0.00092580706596822	0.00528335045030387	1.96732121609289	1.31808690522824	2.759732478485	2.46213885218711	2.13207921222743	1.6031262148942	2.44052043970056	2.54801600094416
C1RL-AS1	1277.85121780187	0.771549731485057	5.26146168026931e-08	8.32295546498742e-07	1.1753386619632	1.13858393926543	1.90760168624169	2.13397134307081	1.32512503480853	1.07021773685973	1.68034767970887	1.62934564613495
C1orf198	6960.54184822196	1.23523011353768	2.3449346714497e-25	2.55768076059333e-23	6.71805625890318	6.21474270947578	14.7948569608372	16.4586744448611	10.6741976045198	9.04316746795168	15.1602495056822	15.3945636239502
C1orf27	1360.30951191344	0.38070226960636	0.0036980503400736	0.0169488752455085	1.90034206023087	2.04355995866809	2.64434998241309	2.57146412091121	2.16645819240736	2.12696744145275	2.34012092292183	2.47148499835202
C21orf91	1085.12274096733	0.550945686937857	5.92699735834241e-05	0.000481457292922409	1.03031489852021	1.07084827833288	1.55650749331667	1.58160165590853	1.04377954041842	0.920771030508125	1.42218878530437	1.34962771776727
C22orf46	574.993663105379	1.17800066984597	8.81417639571208e-10	1.85688061919012e-08	0.439235924636233	0.446823368683214	0.932148410375888	1.20825216664162	0.482073344994802	0.518120461990361	0.719289670937407	0.728956154430096
C2CD3	2331.34809681393	1.18237637438225	1.54069199501383e-14	6.11080915910912e-13	1.10486012160687	1.12518572260433	2.32773172788414	2.94636889370624	0.891831961563663	0.966769544642119	2.2969248847477	2.21542330949758
C5AR1	33.2817793433129	0.942193609108108	0.00825997202902862	0.0324661789283964	0.0468854506927685	0.0422657819364836	0.174791002146646	0.111190699161025	0.0363526254355604	0.0326248586188498	0.116836109983384	0.110249626511301
C6orf163	70.7778356216814	0.918617940607666	0.00426510840347419	0.0191411915332353	0.160689880194311	0.252924835156718	0.474175699552151	0.533852976077818	0.314443620724086	0.190351288793607	0.372887980192369	0.365400248696963
C7orf50	1149.08711952641	0.548157662061689	0.00527736142850634	0.0226232371855937	1.54186158562102	0.928595911103761	2.01341363600473	1.72236377079879	2.22585112017602	1.95521353474948	1.92551341197991	2.42956130883953
C8orf34	51.7034367882118	0.960949179786078	0.00466132156067012	0.0205155789482797	0.026047560914088	0.0405887059722689	0.106817085667615	0.0801404858364294	0.0187534020965269	0.037382777236651	0.0821667668454844	0.0715705130043527
C8orf58	1365.84311893085	0.508326771553228	0.000344490005602915	0.00224109058479049	3.78111482052195	3.3189432556138	5.70905539292399	4.61717110489296	3.56231837330819	3.62233678608083	5.1277298891895	5.27240902273694
C9orf3	1276.7423173409	0.557123139710465	1.77497449766502e-05	0.000165080697406507	1.28146403749654	1.30830035782371	1.9475000268317	1.93246762418165	1.61363839734925	1.29983173495661	1.90746820690332	1.82635045123037
C9orf84	126.873963918175	1.25969179948619	2.60806376131077e-06	2.89368846363644e-05	0.0755775228480697	0.0828647736302107	0.245257784591389	0.212479479117166	0.0628867512615163	0.0687838760170508	0.130533181501389	0.118589883041807
CACNA1C	1443.59085346818	0.694451022097234	8.40681948250131e-07	1.03553946722068e-05	0.523938797332189	0.484164788547018	0.781014955564632	0.882444535684889	0.615905964051878	0.574737978198871	0.720133167971729	0.777658585606389
CACNA1C-IT3	39.7321554873794	1.06597058595269	0.00220869911994138	0.0109913242226673	0.255253116445979	0.30680370701801	0.993887834273333	0.87281992740019	0.557747649150963	0.333029625116544	0.653746339691913	0.630999964351888
CACTIN	1007.30646938315	0.446150246129723	0.0103091191346323	0.038892841365663	1.803432677278	1.25227385049956	2.2657267576088	1.98857799764593	1.98749480510401	1.93097144114208	2.11952707367002	2.43237185418475
CALCOCO1	8024.45563842754	1.01137219495572	8.83923574673979e-22	7.15872236375184e-20	11.3997720840973	11.2175734900183	25.0460956099237	21.5824799153486	13.2048790800459	12.1263164022246	23.2367605476836	23.8640724471093
CAMK2B	34.4539060815305	1.57114685877944	1.22889536908777e-05	0.000118889913211102	0.00652303968413228	0.0143741113551693	0.0752962783901664	0.100252902197535	0.0101152752009327	0.0145626377802106	0.0298009733570607	0.0288420331408949
CAMKK2	2509.00722285901	0.440039612930989	0.000234034805244194	0.00160188296605654	2.23594332332469	2.19454569828271	2.95112749331277	3.1282331903448	2.74811934523522	2.67147099374753	3.0373381678387	3.04835460630096
CAMTA2	1147.8402693842	0.382203548727128	0.013432711671188	0.0479739702542428	1.41762806152074	1.21831023499236	1.60562700016692	1.86689357609608	1.17138801269271	1.23622687713243	1.44488416132436	1.48286100519847
CAPN10-AS1	144.573265354182	0.668131778997394	0.00764971065467842	0.0305559174850932	0.198610435178422	0.192322144348828	0.346691960872445	0.326684886959091	0.242917847139191	0.181997686915386	0.266245885773042	0.170686295033475
CAPN3	258.189946329666	1.62912949044585	2.36832284045326e-13	8.1092573207925e-12	0.217980914694943	0.190935458299848	0.677879154893539	0.762877462046699	0.274643624914456	0.23984438320791	0.61203981866296	0.565639762372425
CAPN7	3144.75735784605	0.403834560675965	0.000573983020801899	0.00347343192677659	3.87655576926814	4.19063099129167	5.42291840835318	5.39376003522636	4.42439929589843	4.39968121496687	4.82154914772778	4.9800190946049
CAPNS1	14666.4294622702	0.325556944019306	0.00121157990056099	0.00661017271282267	46.6410686780947	46.6665960387314	58.3630835641428	59.586878845537	48.4157880317706	49.0082080286825	58.7530471953761	58.5172367524874
CAPS	172.260358857178	0.657271818868507	0.00585092156013368	0.0244768679557093	0.413623100579567	0.371751208107756	0.6522238094281	0.668217308482604	0.854005783388293	0.680329732538966	0.661737221951771	0.745928593391317
CARD8	1210.17335113861	0.337693696114415	0.00881650034550572	0.0342161168358579	1.25115317648741	1.1668757015097	1.56912092860512	1.52175592306856	1.17000133443906	1.28649009189141	1.40593674997913	1.19708118242421
CARF	648.431415459007	0.72709325706096	2.35289261084578e-06	2.6484479062186e-05	0.41945554149053	0.40514080404873	0.702577219762894	0.701582536398347	0.495435873312209	0.513849534196322	0.613896625457157	0.560728066291695
CASKIN2	742.163960821316	0.515587001512078	0.00575513849336313	0.0241746575811386	0.911125506387289	0.616331925719963	1.09713035184818	1.13881584966415	1.09774657189041	0.845946680942757	1.12057157213601	1.17408539369496
CAV2	9442.33548291899	0.72591116671006	2.15781552115821e-13	7.42606995513098e-12	13.8594454603083	14.1223435338414	24.0802656375713	22.91642007002	28.521614557855	30.5117995192983	32.458680529894	25.9387509876415
CBFB	3824.38659467976	0.399359387428374	0.000660886877463127	0.0039272825209529	6.64674286132334	7.05105034097391	9.87954921041326	8.47924388713366	5.91411320159096	5.94811673875566	8.2159730982028	7.25360378785458
CBX1	3622.60100422731	0.356893979286775	0.000902907462005184	0.00517450145068649	7.64389258551198	7.83123341170354	10.3366800281428	9.71692909014075	8.93918419891454	9.06165811042075	10.7206687758147	10.220996268972
CBX6	3912.25098156788	1.41024456249639	1.79013017374304e-28	2.39717926731432e-26	2.47631092398156	1.96978928294134	6.3938728148857	5.84526521193975	2.9289521787452	3.52606257094197	4.25785602929918	4.19181290978368
CBX7	439.428227139079	0.623875636135498	0.000573044715282513	0.00346930607618442	0.619537301125595	0.506125449033244	0.890482167131166	0.896096878371509	0.90213600153336	0.672279389621938	0.851421280366045	0.91533489860922
CC2D1B	2956.19987065338	0.486074892422041	1.2537178246655e-05	0.000120859113176058	2.98777560924701	2.69031145918746	4.15087994608063	3.90143147483913	2.53823962678586	2.43990045473605	3.36207581822456	3.51022209197574
CCDC137	835.105806346448	0.410111950171467	0.0106504631921559	0.039901337210021	2.44718476440856	1.98389057417576	2.85990030555316	3.10424869049879	2.31581180210765	2.41841437442317	2.96262861207631	2.80974147592012
CCDC18-AS1	1497.03279231514	0.679479933180251	1.40366094909301e-06	1.65449521064298e-05	1.7714611160514	1.90871768185851	3.35266930859089	2.72276700995295	2.09670074805805	2.18490995805447	3.05373111797571	2.88308517576031
CCDC186	2384.85068190532	0.766250371918968	3.27539825903368e-11	8.48654433973765e-10	1.24712243958152	1.26965876181747	2.18704185854519	2.17596034835555	1.1370451831812	1.05889533875135	1.42230407735544	1.35673358253189
CCDC191	293.324391456034	1.0552586745661	5.43565761045667e-07	6.96186261187751e-06	0.283582150359204	0.311896525092252	0.628918384791845	0.709481311467393	0.42613013663064	0.487427162582547	0.582813315369204	0.570902149128061
CCDC3	828.333275680429	0.849561125765335	8.08242564885556e-08	1.23649828820941e-06	0.98969112251925	1.00216372259609	1.73223035280542	1.97359877905103	1.42103116102318	1.58821895214331	2.12916003489269	1.9882934025936
CCDC66	711.492134911877	0.457152748567517	0.00443707119921345	0.0197796268850896	1.23771419259969	1.24311266046695	1.63245159709639	1.83378734129658	1.24089901903865	1.41254402217799	1.50934317205656	1.46241662034298
CCDC68	5308.42050566458	1.55627234675532	5.9616515296973e-31	9.59896868323285e-29	3.87640912716193	4.24853107696231	11.5597618773565	13.3985717756384	3.62544955044955	3.43196292702127	5.95198944488881	5.94123390579586
CCDC81	915.334283245615	0.608795550365459	2.79208468061214e-05	0.0002473015409645	1.60739957347434	1.75758477467006	2.76289062240902	2.51301087250417	1.07103644914155	1.30449576277222	3.11443925203821	2.99835802778306
CCDC84	874.681749796508	0.376162678802562	0.00899799990446653	0.034850500775461	3.24714738264792	3.27641297395847	4.23502145176234	4.3546402854991	2.73172846649483	2.76091358512297	3.69869626400134	3.82768929820064
CCDC9	566.677979349102	0.751126124888075	7.40260601554827e-05	0.000587560131222361	1.4837466787198	1.12371656117135	2.0960321629357	2.44991982323055	1.68654203139054	1.45178265835213	1.80616493870609	2.09234723736534
CCDC97	404.740524313444	0.536447553745269	0.00579966291545775	0.0243075428979133	0.544632386836801	0.55025608215434	0.742143713926189	0.893052149065367	0.555737230230233	0.607124553443668	0.625960255111805	0.640652547263402
CCM2	2651.55815464928	0.349990367966568	0.0051779286232428	0.0223101257181774	7.57782021107159	6.43821216888438	9.71737554370369	8.37995359462891	7.35502247785532	7.12714091724069	8.19279570305147	8.67328848381714
CCND2	2956.31828485895	1.05957469798444	4.9236191812769e-10	1.09706671213789e-08	1.87261046873307	1.85792177407694	3.37955713695636	4.75122671552234	2.42225272681789	2.2220357507776	4.27524759718793	4.07194870825938
CCNJ	664.931550989406	0.406115048958975	0.00717282892279604	0.0290022454950124	0.921127398115395	0.875146823534819	1.22837026173751	1.1929847668415	1.09933827789122	0.959760582259503	1.13284548863964	0.988352630155199
CCNL2	11697.4453576916	0.631744898212625	5.25411082137106e-11	1.31352770534276e-09	11.7051603803312	10.9829496708832	18.4828630051283	17.1337647301979	11.4792093869606	11.7972168321319	15.5499029341029	15.4072134850552
CCPG1	685.920471919649	0.425249679831764	0.00607953351224669	0.0252924302531949	0.51665520731555	0.535154354799932	0.707500372717453	0.731221984124116	0.676930330678726	0.700516420361441	0.700539480716518	0.630354353990682
CD164	19772.0349088109	0.347672076901424	0.00127109565285799	0.00686564245403526	36.4719211794928	36.4469888999857	51.2650938200789	42.7309419039741	39.3835563777605	37.5707785365251	49.6773181722187	43.7174887522167
CD36	94.0335697812967	1.78062279345611	5.18401224624637e-08	8.22931521484533e-07	0.0386105774411979	0.0279554879529032	0.26305575233287	0.129389664517084	0.0912356693511802	0.109066639710178	0.295391936216053	0.254859248456472
CD69	599.611672525173	2.71878349036982	7.74465285663829e-33	1.47530182938075e-30	0.440559457871071	0.547066156577161	5.28979173461503	3.17841116067665	0.106169147934849	0.0797469508035638	1.79060207373849	1.79265110077385
CDC42SE1	4829.61634267628	0.409384064830348	0.000198974282959369	0.00139508925714125	8.20064335040566	8.7701714401994	11.8897687948985	10.9629245221302	8.23962733642799	8.05618507523522	9.50952211879843	9.20421631793826
CDCP1	2287.11005570664	0.335998259777364	0.00452337353699015	0.0200312298951204	2.05388838639025	2.147185350217	2.83512908247232	2.54423659561349	1.26040627766924	1.11357057670212	1.49478724611222	1.44351982722384
CDK11A	527.04589188618	0.505387103826836	0.00821199134309553	0.0323474039182236	0.831250752017717	0.894238963446437	1.11251783268824	1.40403068703867	1.03930228922144	0.983152320894315	1.02764855285109	1.09042213779268
CDK11B	694.96589536633	0.513086570739065	0.00240905670449917	0.0118180964556951	1.13945225425813	1.19648606561834	1.56904730182852	1.83894374548257	1.29104363236359	1.25885898671814	1.34935161885937	1.44673139476201
CDK12	3735.83513366103	0.521904341604984	8.27632094539061e-05	0.000644799774115253	2.45506696153424	2.35803262034613	3.22092357706742	3.78640748610634	2.13517302894936	2.17838284302962	2.7921129860559	2.87786210600632
CDK9	1684.73623479395	0.367871925152355	0.00344612247979647	0.0159659589393569	4.13734962759508	3.62902119466287	5.07252004655597	5.05064576882401	4.21251154055218	4.39108721725268	4.34587214050858	4.65816336459155
CDYL2	1361.92969194655	0.473285494733965	0.000253117743435923	0.00171944624810189	0.940631968351592	0.886006762041536	1.38048011715798	1.20210721799997	0.780800149470294	0.795276659920944	1.17498197270567	1.22570057545041
CEACAM19	633.059046853439	0.609898092678	0.00534449763006948	0.0228603195593579	1.26501413055867	1.56690985777303	1.81213137346118	2.71569513845088	1.78614026605758	1.74544263484124	2.21371136594964	2.16962718842501
CELSR3	336.527045440878	0.557453263831256	0.00400062891563457	0.0181389561126241	0.147644166319888	0.145027717884412	0.214364705937569	0.230761027345504	0.245120662695666	0.201918814671063	0.198800073790279	0.229039547293917
CEP170B	2339.23107385383	0.592196108050591	0.000697823126433351	0.00411962365124883	2.14799705707137	1.39577665917452	2.63977875712845	2.83782240499454	2.32094989485401	1.71310569568026	2.36183605383556	2.91436060323507
CEP41	910.622125512475	0.582167062719675	0.00017148955244765	0.00122202117853239	0.454603690860401	0.538998330738458	0.777616303604571	0.753799028209255	0.55529421374414	0.624682842264062	0.652943211510473	0.61281149531292
CEP85L	1769.57178686926	0.334430117754181	0.00917083118781594	0.0353679759952126	1.20337362663884	1.32860538548269	1.64268963887095	1.59633493838921	1.44957167373078	1.41368860633209	1.53312107223535	1.51807152930611
CEP95	1083.21020403974	0.376694500214453	0.0103199303604224	0.0389227713677394	1.97713124238387	2.07729350818545	2.53268930593818	2.80444150000163	2.40054140629955	2.28644355256991	2.38508613099641	2.3839858104698
CFAP44	464.629999583116	1.21333118389961	1.77175099706246e-09	3.56591253501039e-08	0.161898762624303	0.167739155502208	0.358923503571968	0.465825081773487	0.22903386380569	0.187512837597644	0.309988121876876	0.303292492221097
CFAP57	105.377823573281	0.811375757837141	0.0104321424690158	0.0392802691796879	0.0973091122504487	0.0733348825727659	0.251844806430411	0.121021342733798	0.092047294445156	0.134069269795308	0.302303274755136	0.295587523202036
CFAP70	52.8698737189714	1.41328792842971	2.49416569310499e-05	0.00022384599203215	0.03502024643955	0.0356170610199094	0.166934425544278	0.138097924049353	0.0334190049655005	0.0386616465443072	0.129224712088129	0.116133178394058
CFH	1898.8153472558	0.623443927293136	2.69690004138631e-06	2.9775978007959e-05	2.29666809251477	2.13040987825226	3.86998776116371	3.1152672759921	3.39698647467775	3.24701981462201	3.83960622415625	3.72412221469419
CFTR	127.03345782208	1.49618441800767	2.9788790518204e-06	3.24914025611862e-05	0.0602167388184566	0.0462632567506361	0.137930275830851	0.29571062540509	0.0492127689334564	0.0311428780079625	0.038415490211875	0.0539700253154325
CHERP	608.707059820366	0.554069573161574	0.000782068498397352	0.00456707683615414	0.808967363832346	0.750638911016713	1.11247892415506	1.22620731736081	1.06742913357144	1.063092371068	1.04269768966734	1.16680216166465
CHFR	1812.534143398	1.00382836893059	1.50270554722353e-15	6.62022557856622e-14	2.48712573423397	2.13098543982426	4.88338637738154	4.61273406858296	2.9052000758546	2.71918261187333	3.85283963618074	4.4190615139045
CHL1	131.937748162672	0.966550124387947	0.00547947353110839	0.023297667245596	0.0418049286123676	0.0433387258961357	0.0476210150053776	0.1930964156474	0.0810336089741449	0.0654516421863023	0.0658332628331915	0.0718367657090393
CHMP4B	2797.61795783575	0.563420918129927	0.000106492343326839	0.000800171635275279	9.17231792618322	8.61080835270644	11.9583930949308	14.7623531789297	8.72293858478828	8.51507076694463	10.6836821210125	11.1100360983929
CHST10	189.398978713143	0.978580279070684	9.93731452105491e-05	0.000752531796737221	0.297174664142847	0.249613948036377	0.516141783353564	0.675549049195769	0.37950593935945	0.357923220079705	0.551051740525172	0.570420430283066
CHST2	909.340997156092	1.1270422230666	3.96237405552382e-12	1.15002380044978e-10	0.976824010131788	0.779690784078764	2.22434917872641	1.80417630552101	0.669486795872802	0.595380011448382	1.77956664876251	1.84121174385044
CHST3	1363.25120019377	0.714037733360415	1.35001319024796e-06	1.59606017465941e-05	0.971621089249867	0.94219053235102	1.47746845424945	1.73277546871813	1.44345131851669	1.27190921502276	1.47310270907202	1.5203962162188
CHUK	2558.80617612796	0.426339404168208	0.000157253588074863	0.00113010349559645	3.95977311703016	3.90377172563568	5.64290063692704	5.07577303626923	3.36974196570341	3.29757044176516	4.42492533408726	4.36489594647824
CHURC1	1823.40508332248	0.515746752457519	2.99597606095852e-05	0.000262779352947238	2.6291526998044	2.7677719420274	3.92109589892926	3.92140865527915	3.29759464717702	3.14176688685922	4.14050922290342	3.83916917817819
CIB1	1463.42413892666	0.361440025363873	0.00932359434692343	0.0358548801655216	6.67493640970251	6.09701999875584	7.82082828794529	8.74461254209509	6.97941099879645	5.91203967523406	6.77858605506238	6.75947004402313
CIC	2408.77972249519	0.590710158565355	0.000527432573066458	0.00321619727264375	1.79471280044053	1.19119281855475	2.22251911656009	2.38207569714585	2.05991033384571	1.59343260275945	2.16514067872527	2.42906935184564
CIDECP	292.727050092739	0.495896231299124	0.0123748177325109	0.0450159789758498	1.90117768945783	1.97970536477437	2.94418960472056	2.74401990593094	2.66875517174994	2.90091060749089	2.78168396431798	2.45592246854937
CITED4	117.395806412277	1.52278041743647	9.38798586578813e-08	1.41710389324536e-06	0.285971205031725	0.219705675552401	1.08468204402954	0.806498611110642	0.227720361488387	0.332771662587406	0.594389505994092	0.897068774772431
CLCN7	2892.67683270716	0.499375564768019	0.00220295097526146	0.010970144307957	4.37042578352296	2.99220733237122	5.79878823467517	4.8487590084704	4.81471700857078	4.28772358798889	4.85231954986661	5.51535907802085
CLDN12	2274.51261402644	0.604956332262856	1.63259051394627e-06	1.90515847291832e-05	3.05006701271297	3.32874485997283	5.31087745690282	4.61359147557738	2.91807928919963	3.15014758386713	4.19484984240085	3.66471761434985
CLDN15	258.293005168946	0.817048460479859	0.000131188605811056	0.000963122857043282	0.569159436444122	0.485020566241707	0.952254386670083	1.014299967383	0.682632322015884	0.595614481046225	0.907377368912849	0.805107232460199
CLEC2B	2356.12717841666	0.616039248232454	3.60175070477613e-06	3.8569816533727e-05	6.10043334505428	5.72885921028968	10.40030477238	8.17420770907823	6.96968270682361	6.74088129320784	9.00303538780822	8.75121841941149
CLIC2	61.9557894753692	1.12437041782334	0.000494660478169265	0.0030410377123815	0.0740762907955532	0.0783522458902713	0.216018205935982	0.234811908408935	0.361840740845836	0.226799685305798	0.318681500889164	0.358648647962152
CLIC4	68521.6166872478	0.601797974913195	1.17126034223753e-08	2.07075766389054e-07	77.3717234458448	82.2586129411045	131.641611621991	114.609668822613	86.2495829216834	90.2235388164181	133.701522937758	117.411553209336
CLN3	944.213387516797	0.59067134439237	4.14688831784291e-05	0.000353190582486305	2.24049690970381	1.92801358108591	3.19243522686025	3.20081159103979	2.33050926808945	2.13146527854735	2.87782693575499	2.87044098221284
CLN5	1922.4701735082	0.350049025178208	0.00742888189842706	0.0298235760392478	3.81661421158659	4.03079806007786	5.56622501228064	4.62114410006739	4.64742586088624	4.42905613574638	5.07410648403733	5.10279997304322
CLSTN3	1006.66999715068	0.554538117496296	0.000594638182664207	0.00358080205722769	1.4436047522047	1.19992294408943	1.82451077810158	2.12822937030029	1.57745719990077	1.42654069302795	1.80352647841043	1.85371285586804
CLTB	4276.19485401842	0.465710796487522	0.000425837085998251	0.00268756257028761	14.665005282008	11.8038689384297	20.2907546645004	16.8790279349847	13.4239433646904	14.5877153276856	19.9506675989737	21.7747115943932
CMIP	985.731144316949	0.577671099071723	9.73896685409637e-05	0.000741664001698499	1.17193658965701	1.10572628200929	1.63730822930983	1.82382382626656	1.04092335426401	1.07677607031465	1.72396528275772	1.78228171926473
CNEP1R1	1470.20257052073	0.42334635157345	0.00154739899475485	0.00813391815159708	3.69405040352203	3.822740241593	5.60086208011678	4.68868599736683	3.5882520273907	3.73247033971097	4.9179437553587	4.46678920890599
CNIH3	1040.78460401355	1.18663903306581	1.55310406730387e-16	7.55601888859166e-15	1.22256488093508	1.10537370023476	3.00056493817371	2.52645962555439	0.703721775866782	0.704028768467322	1.44539566468469	1.5970082031604
CNN1	3941.12472441409	0.449615849375529	0.000197269899231221	0.00138393589133579	12.4046106656299	10.3611374546955	16.7181873046441	14.7988560651588	8.98536856568218	10.2223338703226	17.1304210428704	17.0994634201254
CNNM2	737.255967268792	0.548618340625731	0.013939526852844	0.0494186371388508	0.872412312328478	0.837810123010719	0.969894633691448	1.62841559035736	1.069131659973	0.824034841634525	0.752623774645315	0.763592827405193
CNPPD1	1710.17187745288	0.427558922977767	0.00114740037891553	0.00632637184053505	3.89591306340631	3.30564130575167	5.24968305927494	4.58596547183222	4.0090200988949	4.0532491143828	5.04586134530971	4.88182242802541
COA7	915.761219486977	0.364645060344787	0.00801063615642287	0.0317258723325386	2.52047908309649	2.40885900145928	3.32923115403743	3.11405086329626	2.50320045424179	2.57412680908435	3.29205052900676	3.20872734947152
COG8	986.041214026671	0.437307179782169	0.00188035774412216	0.00960054303105028	2.12758983123273	2.22607916158198	3.20351157395891	2.82048523633829	2.53335479505107	2.46037036869668	2.84414889180595	2.80891982762519
COL13A1	2360.24184768626	0.753059736794372	7.52597282523262e-10	1.61313442886325e-08	3.6865901633117	3.51912772917118	5.96908817056148	6.39302510391769	3.90003695985266	3.74753058554027	5.20353449950731	5.45278645461218
COL15A1	3025.64171101973	0.576181361395633	7.49162675070158e-05	0.000593233324374935	2.88190106891777	2.92221760264314	3.93941265594256	4.87277550971965	7.49107767612415	5.48829382564803	4.6899930690181	4.96884583853006
COL17A1	58.7447917119635	1.17925311647409	0.000319058709363869	0.00209682655206333	0.0284579718222061	0.0364500304327101	0.10697666301315	0.103048560516039	0.00689527597995843	0.0170175566013207	0.0975092097936196	0.0861140336550835
COL27A1	2259.93937674628	0.360923587907706	0.0129334668131893	0.0464979103265246	1.77970043324383	1.52364770555705	1.96064526807967	2.32216029092379	1.61961292278545	1.27495054689303	1.50298086574496	1.66419565252321
COL5A1	35399.5342209101	0.468320914322931	0.00047166714168014	0.00293097523871775	24.9334630500262	20.5114216933089	29.3332072061598	34.3301543519189	36.0491057951701	26.5859778278569	33.086319145503	37.4363320382698
COL7A1	11165.8796166296	0.493804058319058	2.45232233144205e-05	0.000220970416607287	7.25965181212173	5.92650803532652	9.45598330849412	9.33663281202826	10.0695154125087	8.18494732037441	8.83803278802603	9.26016269916109
COLEC10	192.985004851548	0.899776759921771	0.000987993041093907	0.00558403923142294	0.212010339654742	0.229998311553681	0.351732041015723	0.579618667353106	0.432030081217717	0.335479039411871	0.380810960975536	0.369558682472503
COMMD5	628.658875501074	1.23888846207878	4.8602091714533e-14	1.83103980623693e-12	1.44707347020885	1.21617748279427	3.53702491199183	3.09306719090928	2.65276266790509	2.3880539166592	2.73325422243311	2.74904863889139
COMT	3859.60642202015	0.384770083208883	0.0131892178606495	0.0472224324755865	9.7201237495458	7.34556333318541	12.961020963538	9.76539185101022	10.5244274511398	10.7509563663749	12.3412520553669	12.846783831848
COPS9	1405.14485216232	0.37273103615856	0.00369265852349233	0.0169299005187233	8.57569758810602	7.5767176341839	10.7111871131215	10.4358904363066	9.93463554588672	8.93870819878027	10.3401007429532	10.2780057820201
COQ4	749.958882751744	0.488957162964304	0.00218707709845288	0.0108969626292447	2.81108242915704	2.33548481795372	3.55989282469837	3.78147232648968	2.85700685026445	2.58661461369072	2.88766368353763	3.41388011541687
COQ7	715.32032094221	0.508184723277896	0.00120948194565362	0.00660405462856889	1.34104186594972	1.43522395235432	1.96195122249689	2.07461308277125	1.20557876848574	1.45300756888843	1.89042896060566	1.70673490663517
COQ8A	204.414207067	0.77321682005305	0.000588330401789388	0.00354913857457693	0.344659956698448	0.304547797407583	0.609518196237714	0.577601422544243	0.732903694567442	0.519134415622848	0.584630073253897	0.676718039243954
CPA4	10458.7999060093	0.633741836791565	4.53985528674374e-06	4.7857788583951e-05	19.2477341126926	18.4307126466749	34.9033673619812	25.1248442875634	11.295783833315	14.4304167982697	36.504584945878	34.0122732025183
CPEB3	185.025507610243	0.782304988570445	0.000877030452294771	0.005043297987792	0.141097403337828	0.140463117902772	0.287418583873294	0.240183447696767	0.120983358352064	0.150881829823222	0.217399089433399	0.219088853157792
CPPED1	1147.51391219811	0.396873559326749	0.00360896164471377	0.0166137529764308	1.04767365436332	1.05123845469129	1.36624680069944	1.43378455303946	1.22665646404461	1.29456705649243	1.49775103927463	1.5534550048877
CPT2	735.49930613092	0.467955901705047	0.00184712127430831	0.00944868201021933	1.38351479082064	1.20882048817164	1.87503052204367	1.77552889134922	2.0428959966556	1.87604536070824	1.81468032603556	1.95069092043007
CRBN	1666.26222400716	0.329304199499641	0.00621764872587055	0.0257561099593872	3.80869067158983	3.62273485695195	4.94834159094018	4.50677870781387	3.98022154874616	4.06781998289787	4.50108245291547	4.31651470940231
CREBBP	4159.12338315374	0.419805477343244	0.00314833043971684	0.0147962635349766	2.34968236217699	2.19056522824677	2.74681153166365	3.40015547117621	2.37118099300993	2.27247971144159	2.48806999602244	2.76953430946734
CREBRF	3731.08436586297	0.430958666464363	3.66785241447639e-05	0.000314570094519931	2.40889617798744	2.34743049853637	3.32780807522711	3.15909609593236	3.57205849963755	3.21333509479917	3.52362232688955	3.29256855942015
CRIP2	181.297429056234	0.738935810252888	0.00400920079930709	0.0181717294941784	0.340571034623152	0.216484401079331	0.489417355563934	0.516538043148423	0.424022133727841	0.3164528305177	0.471265179101835	0.562524242396518
CSAD	805.392764724007	0.608612619511486	6.15912860325425e-05	0.0004982189854008	1.37503563990652	1.35369785004989	2.03736453716055	2.21352236188183	1.69507576590461	1.48282192632856	1.73494265833638	1.81956819149913
CSGALNACT1	957.022989153121	1.17659649149374	2.08704370295699e-13	7.20083318430952e-12	0.692156310514545	0.827403203733141	1.74901480964818	1.8666905653399	1.38835895081302	1.2033679435355	1.67280737338805	1.67916463785168
CSNK1D	3533.5629912389	0.427409603665959	0.00196518771378351	0.00997716359944519	5.32707741881783	5.01372907399363	6.38165292380316	7.68927462469944	5.18894149969997	5.06161714960944	6.08328202355025	6.39622233385652
CSRNP1	1734.27335754144	0.639918609981131	1.8897672322359e-07	2.6876027146152e-06	2.38431388672922	2.49811870861608	4.03993696955606	3.72893888530808	1.2940741286488	1.44834112040126	2.64934112489761	3.00826011915414
CSTB	3592.49393529605	0.521138202425504	2.49864109516706e-06	2.7905962685495e-05	21.219334748885	19.6835793202007	29.3781815675846	30.0063300315736	14.0326935132131	15.2241776922958	20.9176272760997	21.6486689897323
CSTF2T	1536.12754513583	0.420530049281436	0.000845129963894039	0.00488895755417745	2.02960385534175	2.12493292554128	2.96242065713908	2.69458576480189	1.83906573176996	1.81181080720339	2.44564841972337	2.24940946285575
CTC-338M12.4	100.80067502649	0.763503640532279	0.00711628405591389	0.0288080640096484	0.492501301587414	0.403720968859829	0.843774469373215	0.872458603352927	0.488781813987024	0.603157307219959	0.66750813532215	0.829675391935487
CTDP1	343.158222111611	0.51103495108656	0.0112105164179712	0.0415631125419574	0.32108051753097	0.240695656521981	0.429800773106719	0.397037806504176	0.377593593363469	0.326312630368235	0.342739742994753	0.405525202873438
CTDSP1	3904.2064809681	0.44466801802676	0.000139179006566107	0.00101367585557706	8.08295970705129	7.41250999480995	11.6541069341178	9.76060912952936	7.77546043911522	7.24598990091703	10.3660678842515	10.1718987936525
CTIF	5865.06770924348	0.523169092902108	5.60398340063539e-05	0.000459914293043651	5.80882514020889	4.95684682919885	7.33161562848887	8.34089202486598	6.30568603265595	6.35198581293962	7.83134458589342	8.25234989305841
CTSF	376.368727687078	0.548790535148577	0.00243065121566018	0.0119110716274652	0.990871536262265	0.962912726941827	1.51249279011889	1.43971810589276	1.40209651046295	1.25142413251341	1.59572078862237	1.48522722735283
CTSH	58.2302015878308	1.20143777147508	0.000362923550206514	0.0023440979066586	0.0870447433576948	0.0726862776957268	0.212921870597798	0.32657385313468	0.34100273937249	0.192865641481635	0.181393395323148	0.270424518306645
CTTNBP2NL	5005.74410203163	0.412111673891528	0.00120393236669608	0.00658438546686794	4.63895991243248	4.83540842480291	5.95669630786356	6.80189905615312	4.07149684944728	4.26210185310169	5.89521676379807	5.82927627257878
CUBN	313.599973251925	1.25862167650663	2.81554225910402e-09	5.45561734303466e-08	0.0852898508134101	0.103921946180072	0.237745839529769	0.262012556364358	0.103732501795201	0.0880041412777593	0.221567269215955	0.227932426985443
CUL5	4009.08151454436	0.326886918435647	0.00175348122483468	0.00904839128801566	3.63378826319	3.63120704999521	4.7508056333748	4.45927371657069	4.44664008350768	4.31977365620092	4.66775533871148	4.04922185726146
CXorf23	992.152021804852	0.364855854518871	0.00934901423162462	0.0359310132883239	0.905281420521385	0.836219684816724	1.11071502932861	1.15716340175144	1.01294280685249	0.91321524743141	1.03337557958078	0.988797037746917
CYB561D1	707.9967708283	0.506088604570641	0.00129538332462	0.00697732356251914	0.739116768160075	0.73164087432761	1.01738810112079	1.11161466292803	0.777100410790754	0.744198836502434	0.888374701501062	0.785358998750658
CYB5D2	734.288377377612	0.567182126875829	0.000295098646940465	0.00196128216209818	2.06838246434407	1.76603692291486	2.82964494998069	2.96170491703497	2.03266674108093	1.9313056681334	2.62614089746369	2.61472695444808
CYP1B1	198.069274830855	0.862102164581394	0.00109433572216759	0.00609591871594591	0.172302832158388	0.157419946295911	0.432244665744828	0.251932561004158	0.250678199741702	0.107434469672831	0.095817524013828	0.0808928373619005
CYP26B1	110.448620366499	1.98758826181889	3.54706073058214e-11	9.15112121176983e-10	0.0591325860391456	0.0332999194733112	0.303366656305947	0.243146931685693	0.0458484395383803	0.0314316810360215	0.12006731056677	0.146707255250661
CYP2S1	504.004430993162	0.94613745142622	2.20330676618486e-06	2.51050749895958e-05	0.798550319258313	0.854700875877154	1.4589023955509	1.91591935713463	0.633897646587413	0.269232791443303	1.12921536303491	1.05168615786676
CYP4V2	912.457152980979	1.16381151618969	5.18001857851718e-16	2.39930655049469e-14	0.816658036248297	0.716560146078521	1.80739164391371	1.75464494025115	1.465395660654	1.05534898208701	1.88647707326063	1.81905213093167
CYSTM1	778.301516722737	0.68546914495248	3.46133881695358e-05	0.000299193859370752	3.90351119535969	4.49416858741766	7.78402169386342	6.29290482218804	4.56538495800953	4.92029923056801	6.64580627115379	6.70507225588179
CYTH1	927.214799976055	0.505829021124065	0.000277222501578078	0.00185983845924777	1.29650167728229	1.1900334692755	1.88131372885194	1.71755824447475	1.20629079992412	1.31680679356426	1.60798623917225	1.5659822252516
CYTH2	2374.79116609315	0.745821307538623	1.73742353324864e-05	0.000161947989574003	2.4257533176862	2.50993668670616	3.55075676680178	5.00028701240123	2.6499232574196	2.42038635291995	2.88269847157398	2.75514413696854
CYTH3	7214.61412420815	0.460513853190209	8.89243427265805e-06	8.85641925903536e-05	9.20743917568921	8.52628587260415	12.2319085032262	12.4165074758473	14.2831682582352	13.2698426268175	16.5813589036252	16.5704372910756
D2HGDH	820.499320977239	0.515985424475601	0.00622519778667928	0.0257715947550772	1.99789858670272	1.33082836070531	2.6807405199386	2.22559309752422	2.84733873447002	2.45771290846877	2.63105037282568	3.01612371567243
DACT1	519.599340331726	1.66226151537165	6.18369858166296e-18	3.48477180487465e-16	0.366957632682425	0.324947263358121	1.07340942228859	1.32611998416282	0.400436304219988	0.290414937559065	0.527778282520857	0.618963781094546
DCAF1	1697.45209866582	0.538429774419292	5.85990392613233e-05	0.000477728755882699	1.58624976789428	1.41466621813728	2.11225875694519	2.30647630911039	1.45035195895726	1.49701468878417	1.87755871029664	1.93648803688338
DCAF7	4746.15597039395	0.475805608501101	0.000270782535442796	0.00182115056780896	4.095374081406	3.9974633448254	5.2383526289122	6.16062762351648	3.95008867859497	3.71341166694753	3.88511904750304	3.99598820789831
DCBLD1	1315.15709990024	0.574188985381213	2.91245592595354e-05	0.00025628475210489	3.4881507744039	3.27053355922867	4.88900731702637	5.33512410952753	3.58065468761327	3.51132269436025	3.6472933439237	3.71457269067617
DCP2	3681.16354355486	0.328931973397039	0.00674457413884874	0.0275423808055342	1.98133012841499	2.18302059134088	2.84524565526296	2.4669591062421	2.15829981396995	1.99025313910598	2.40712116876167	2.43089779100334
DCUN1D2	881.974451945327	0.521587170588436	0.000669973170917576	0.00397603647944722	1.4856759468282	1.60932674115406	2.1734380461635	2.36421457560359	1.40477874124541	1.53493416519545	2.03171013638158	2.02969309487675
DDB2	2058.94511995468	0.919552759261452	6.15999235324987e-14	2.27633597206843e-12	5.03763271285726	4.92579328313006	9.39316462328395	9.87449150427302	4.85624436874215	4.69076792317833	8.15672278749802	8.50502472804305
DDIT4	3784.98467293968	0.349641726115896	0.00202044171328463	0.0102155043634298	12.8541771503729	11.9463444582849	15.5546632530165	16.3169613167751	26.2519922467791	20.2271143997725	17.9315327546774	19.5285669444075
DDRGK1	991.114878444385	0.587573487093106	3.87241525349023e-05	0.000331064578403637	4.22440562560686	3.57840666626279	6.06431060472495	5.88119516772059	4.73699181878397	3.7665869588295	4.95169350555719	5.2721507810222
DDX19A	2106.08006242061	0.467641805075282	4.09490704361971e-05	0.000348983098707981	3.53240653272187	3.36932272491361	4.98534979476598	4.68795941367152	3.84737797318425	4.09804800083459	4.81909650300471	4.53287868466652
DDX52	333.383553607881	0.785287972670333	6.07969917457821e-05	0.000492088158804131	0.112621101536676	0.125604834599204	0.215037548962244	0.218219033649029	0.179393649735337	0.156133207229854	0.224590997360375	0.190038305018635
DEDD2	621.130556220558	0.419914274383172	0.0121629745622866	0.0444006021470785	1.61499923751512	1.39658765320622	2.28319833263848	1.84965871711599	1.40786695284233	1.37397786716936	1.77808925594245	1.89038772582172
DEF8	2884.05613171843	0.413470440489646	0.000462567016113916	0.00288570982146712	4.08580947100432	3.55761436000457	5.46011930009534	4.85278405515129	4.24224175094168	4.16260725738088	5.05726009557878	4.90532997371323
DGCR14	635.46071497276	0.432744374020992	0.00700970778068701	0.0284789119056148	0.684981458924567	0.582374243862114	0.863426958499828	0.874747690099475	0.775043928852149	0.672579830280414	0.811778812554375	0.878796742266565
DGCR8	2027.75080585973	0.348270373139068	0.00304757922053174	0.0143919374852276	2.53204725587935	2.60932480203237	3.42999842636742	3.20282617842688	2.38770287855556	2.45430062663322	3.14997533754208	3.24887349441852
DGKD	3359.03258201624	0.525977760181711	1.26542151252987e-06	1.50393901203572e-05	2.90435801176173	2.70161838616922	4.29562223357633	3.89067866123619	1.81288306622175	1.77594975949284	2.80530150269547	2.91837212854261
DGKI	341.177901231023	0.559032005648588	0.00653136531683084	0.0268419069918375	0.270141302673031	0.238112374247755	0.34908012941406	0.423592585058169	0.264865121935782	0.227012888705714	0.317790723127704	0.305247536219084
DHDDS	1970.71627399276	0.324886351814462	0.00511353350052999	0.0221172179707925	3.52850507270689	3.28534491816794	4.44203753356154	4.1837482759085	3.4053527254647	3.49566816885984	4.1536226907313	3.97739727586248
DHRS7B	432.996480959878	0.507418484680718	0.00333584652986735	0.0155112441834954	1.08229020582524	1.03246117057365	1.56890945824091	1.51820541590449	0.920590347310514	1.13164025474384	1.29002601980396	1.31447467039515
DHX32	3075.13217870166	0.404175008033548	0.00154899537942476	0.00813598543950288	5.24580301675566	5.95384073327637	8.08004841025706	7.0166532311182	5.65243280581709	5.18079832445146	5.8083224181748	5.8309971282744
DHX33	1329.43176945576	0.585232732735854	2.65194199105401e-05	0.000236125842192268	1.19530889945147	1.25749653963158	1.79820953571499	1.95297956716752	1.47761910358274	1.51920313857009	1.69045759087298	1.57611648746718
DIO2	1976.55922070039	0.382059181211763	0.00656146056828758	0.0269436777082165	1.43350991022129	1.71886071186601	2.09274516561181	2.08978233285277	0.79938354481879	0.755369955076797	1.26357697109596	1.31419387393662
DIXDC1	1891.91320066033	0.647381340105355	2.37209307299815e-07	3.29728250897226e-06	1.2053536728253	1.24684743256062	1.91468746559955	1.99659119978554	1.65484501351478	1.34547157340622	2.15222903891905	2.24044676725196
DKK2	359.058459551688	1.01495672883856	6.74862690282081e-07	8.50654043435707e-06	0.411523633633256	0.408073393648508	0.795045147441693	0.972010519875188	0.0957224317371738	0.160120375159141	0.687271917575481	0.640491390011211
DLGAP4	1955.48975122018	0.47251910721243	0.00546116586036558	0.0232563816944095	1.93611826125015	1.56459278031257	2.13283730705183	2.8058553582414	1.80446112727902	1.67946549210478	2.08742949280642	2.41559129982856
DMPK	1714.90925020687	0.584244693765811	0.000239966389349419	0.00163803735998043	2.77123902426334	2.03318526812772	3.50713100482921	3.83792270283884	3.18438919446906	2.59220792141996	3.68498620668445	3.79742304342325
DMWD	1256.33408296207	0.52102563552265	0.0015752820083536	0.00825162244887006	2.34370173507107	1.70689704472777	2.84225481022543	3.07703750637297	2.46267658129914	2.02596377746231	2.51951604542691	3.06283515595436
DNAH1	922.475340999242	1.19988261018544	7.79365214121164e-16	3.56111977060431e-14	0.270191999344558	0.27371290292011	0.625621720306498	0.67622014342826	0.373547237081766	0.346628546498114	0.496074695845547	0.554764847451716
DNAH14	230.857585778941	0.606172462124473	0.00673676572313393	0.027518802901053	0.0773012764375758	0.0834972114036356	0.120762201035803	0.136921292723182	0.135390081713141	0.138675959272435	0.122448576811631	0.116728238816177
DNAJB1	4195.269143123	0.345599446533816	0.00244247352367879	0.0119646701947684	8.36647320512979	8.35818977034962	11.6955330207377	9.85916164337517	7.08888019291985	6.85091717867396	10.4107338634509	10.7507716797645
DNAJB2	2670.30321180191	0.486674254733051	6.46042924636337e-05	0.000521033426100564	4.94593289516141	4.32082705526916	7.08527834468693	6.10573015123159	5.4464957532574	4.83299696601131	6.59106352924587	6.66439384788775
DNAJB6	5523.83517682485	0.391962142069632	0.00236090885478613	0.011628292884553	9.36813126289411	10.1177418734925	12.1145202236678	13.7710754962664	7.42606956953288	8.13726743568463	11.0653339194248	10.5117289726243
DNAJB9	1535.97907324546	0.615709614403718	7.45521414577065e-06	7.51914774955616e-05	3.0547538769169	3.13960042500857	4.5859184144329	5.08507077355422	3.72193304651529	3.21989872374304	3.80478336881372	3.03511601373664
DNAJC1	1224.51223862979	0.490881685842379	0.000208880868472207	0.00145175423745458	3.25921863262552	3.07574017616692	4.45301231404331	4.57698254612295	3.52970859188701	3.10010073793328	3.92778459910546	3.73774611163779
DNAJC24	1007.86529116001	0.451323295978054	0.00228703652289059	0.0113097509952816	1.70957708475425	1.96569135086439	2.59150966149355	2.54445779158175	1.54987876311918	1.74707341336139	2.08933796401537	1.83754371732685
DNASE1	419.725031315638	0.43604854505991	0.0123719090042025	0.0450159789758498	0.76011169249774	0.730317604068532	1.05370977141584	1.01216138731085	0.913995762337601	0.776567466701715	1.10849317417096	0.933499215082612
DNHD1	1047.85109613345	1.36145314134445	1.51922753722707e-16	7.41788896786863e-15	0.244997410874489	0.227167795821371	0.572952816316602	0.706104641522411	0.277290357335874	0.277637962979812	0.511674603432336	0.541495100692653
DNMT3A	482.796127752385	0.631295125237075	0.0022889638019041	0.011315144525129	0.396957830277653	0.399051607747245	0.536641931916203	0.74436372505342	0.668978927444357	0.558717464111354	0.514582960664943	0.525464339227049
DNTTIP1	795.904359101566	0.751927967106117	4.11361941236135e-07	5.44923629306438e-06	2.90060359597704	3.0220165141274	5.10336731924747	5.1618382803237	3.34048860835577	2.99726662604889	4.14039348471545	4.53499161371601
DOK3	55.5483062385277	0.838072799725994	0.0115437673459427	0.0426117503695073	0.06768621619103	0.0577966847731779	0.125934935401291	0.15997613551088	0.0524804950786661	0.0404756186546393	0.100929014141243	0.173955856101918
DOLPP1	613.846743243386	0.480712481786327	0.00216063953700395	0.0107872461195934	1.57741648498869	1.47324996995918	2.30668429622104	2.05304699182561	1.60703025807906	1.56189261681497	2.03556823700027	1.90383530313219
DOT1L	1102.09807184235	0.437880482887086	0.0078034587383469	0.0310416998341594	0.933935066384086	0.704336482316359	1.0675367507922	1.18365856385055	0.977986776565701	0.807553547653502	0.945101284519643	1.1658585127049
DPH7	1113.98483327943	0.34462062892022	0.00876863235753154	0.0340596647431402	1.25588778294686	1.20036066040357	1.65470532076162	1.50986745394096	1.31122073229646	1.21628767389797	1.57820860813403	1.41028923811179
DPP7	2356.59936819379	0.509582599162392	0.00623538290357554	0.0257979668922787	9.71273482166569	5.84976196108365	12.2027492224957	10.5869485957241	11.9516240720373	9.42876824835216	11.2718767092211	13.2724427996601
DPY19L4	3773.99069545066	0.979523458729281	1.1848333130138e-19	7.56409130198104e-18	2.60576007870101	2.66538796383299	5.54128475086481	5.08870583973035	4.5917627050368	4.67694539937491	5.6927101408206	4.71866233895937
DPYSL4	86.6086158425965	0.83711677405854	0.0122953373018431	0.0447750234268788	0.183487980326609	0.072779842231194	0.240786016050194	0.338404242872002	0.375585860145555	0.228225524629334	0.312957105847366	0.28963543067202
DUSP22	521.250493523491	0.473053384051968	0.00553318371728265	0.0235038661357562	0.879664935343724	0.733965501667907	1.21153741463823	1.08288150856548	1.48770349893638	1.30196688818744	1.23338949710776	1.17251258119679
DUSP3	8615.32641206724	0.525289527394831	1.42321878675812e-07	2.0787293834669e-06	11.3602892783032	10.9697955724362	17.1977572810029	15.3692761444839	10.8746431269482	10.5775013440097	15.3518555884469	15.8493367455722
DUSP6	3467.48651790576	0.923147926410927	2.22955234038594e-16	1.07695340727571e-14	4.42327096821571	4.69802778107372	9.01534405145575	8.6745006752094	4.02206830085157	4.60892074410185	5.74686827322691	6.52618835934877
DYSF	28.8492506138296	0.909190102305836	0.0117428812835399	0.0431549223701974	0.00685495766018206	0.0163139646353352	0.03998028625938	0.0407554270278125	0.0255119526777027	0.101004038541804	0.0887325323846744	0.0518294664383299
E2F7	4346.12362150456	0.700746747446428	2.80973903171333e-09	5.45218370214101e-08	3.67247437208678	3.80196647452287	6.77422591101124	5.6458949759895	3.13853121123787	3.31587134839955	5.31738844320043	5.22876872164308
E4F1	837.117547398713	0.505158225942986	0.00756458653112459	0.0302964266607818	2.01744584474021	1.35608164352453	2.74059602736253	2.1978215612657	2.49809268200054	1.99868024730449	2.35006636328329	2.68356840512701
EBF4	115.924388425363	0.752692825017154	0.00557269402923246	0.0235975850799527	0.198807430253981	0.165416838943582	0.340480516254494	0.341038226971451	0.369417193844849	0.183656323664408	0.310585200609386	0.368287299785947
EBLN3P	2171.3872960701	0.538976717401409	4.56165078221826e-06	4.80428781911523e-05	2.58175598880509	2.67771262829159	3.91986945088869	3.84375416065114	3.69583640399609	3.49360129247973	3.58432711291655	3.40646759849363
ECM1	10605.348053006	0.617657988457769	4.88402796840833e-10	1.09004089558948e-08	25.4170363117996	23.4580381653246	38.1490959629144	37.7572768676498	23.556271680477	23.723770623273	35.0626684772458	35.5747778658049
EDNRB	387.399953054918	1.88836281022519	9.68973009011194e-17	4.85383701736163e-15	0.185546820730986	0.189210792607052	0.67095847692026	0.959207962714806	0.298440639298735	0.200191102048296	0.359213576764445	0.340381636218866
EEA1	8562.29198379886	0.373063049405302	0.00524638394524461	0.0225189917040411	5.98460159649792	6.14872504918388	7.20805894829575	8.68417005354258	6.20331353878885	6.2269840187979	7.42386281444467	7.10155005396521
EFCC1	31.5136709716049	1.95435055933309	5.21203609388564e-08	8.26410177840602e-07	0	0	0.0777180885138267	0.226075647394536	0.00287495341862258	0	0.0197633400873046	0.0147554169546897
EFNB2	3534.40669052936	0.406416817337547	0.000113891745792669	0.000850571983349444	4.5580271360389	4.47620803955806	6.2409556070824	5.87335731310592	4.05959019675855	4.50466787198899	6.27792868976995	5.8741123180466
EGR2	155.373342804613	2.15104398031502	3.22359137244248e-13	1.09545410332373e-11	0.078890546886156	0.0876166184178567	0.419854645159136	0.69685262000713	0.0685079032847482	0.117750512612364	0.240278070728005	0.282543835567386
EHD1	5577.31078472811	0.414986215892664	0.000926885600545272	0.00528727446114501	8.65070596702205	7.17067013942601	11.664638651298	9.74096388155347	8.03503936688478	7.76787302791512	11.9297055620347	13.4254571700658
EIF1	12736.7512409996	0.430131326259521	0.00210449611686582	0.0105654454271011	50.2892039078326	55.9589369195175	65.639783228325	79.6418456999928	64.7392157699851	61.0321577078212	61.8063584747945	71.0540593710309
EIF5	17135.1522023241	0.448333648213061	3.14688998451844e-05	0.000274946298711963	14.3455738274464	15.7494200929781	21.5757885304277	20.059163748899	16.5762742530329	15.5438970057187	19.4333063141788	18.3005676957147
ELL	1021.56803480787	0.44877973963088	0.00364178463124113	0.0167363700773144	1.5659657973533	1.22359596140123	2.061565416721	1.81738144803839	1.58303345199876	1.34419258173437	1.74516343473754	1.95559656319151
ELMOD2	2598.46719946436	0.447044177925681	0.000286610294960093	0.00191238492320437	3.06199531159625	3.41707934607085	4.65890767713086	4.32760415572663	2.80928463117961	2.9339942704189	3.53945456862003	2.9899447884607
ELN	577.148286397664	0.959775935112269	3.14485692326803e-07	4.2576766653854e-06	0.671193434251891	0.574019838936922	1.1300898046988	1.40701720866888	1.29618773822804	0.885691691170163	1.45910255415109	1.49930754708316
ELP6	796.935546039879	0.386536570803727	0.00721730775540402	0.0291298380757504	3.32109435893424	3.33481301408827	4.48921341228644	4.35721208406946	3.53848797905837	3.41818249767507	3.81850836202553	3.70381200938076
EML4	5662.58074323762	0.661722564996504	8.46444695101161e-10	1.78877570331925e-08	4.96122660735393	5.28200566589656	8.54197400545927	7.94587332234515	7.63355036448117	7.65842375816469	8.39546961068117	8.51710606660751
EMP1	22941.8233179789	0.42093077869457	0.000267523419626173	0.00180371597729013	43.8729327987572	47.1855129245348	67.792263525193	56.0708532320913	47.4564172509378	50.5329303202874	60.1846386418226	60.0558678364201
EMP3	7716.07385706374	0.788719970669518	3.23416972531442e-15	1.38424511186321e-13	43.3775424101004	39.8537668353378	75.7682788225828	70.2820856388647	40.9141808387726	39.0513652715846	68.8682233881331	69.3521956184481
ENC1	2208.1799562255	0.471933549591375	5.75755906067761e-05	0.000470235424490729	2.126960762564	2.07976276882023	2.92094100825011	2.98602693923954	1.40332107818512	1.73169978600231	2.29731675576093	2.21017109226487
ENDOV	737.522417626371	0.561524820843984	0.000502052295130932	0.003076691115381	1.28663105070867	1.01360343229833	1.77906841750129	1.69092196544407	1.56665269853159	1.31631661831353	1.64712549439947	1.75988666534582
EP300	4516.71022113623	0.450019349881616	0.00242221628337714	0.0118783448994474	2.97258067870337	2.6909146959218	3.44685621717464	4.39514426108159	2.80460254387107	2.79507685593191	3.07771443039526	3.43920373330944
EP400NL	182.101831165835	0.58700326642056	0.0130352293277989	0.0467891392405734	0.635381081400766	0.565762781362646	0.91580086757521	0.987271319502636	0.55799315210915	0.682360895300521	0.622025124853061	0.769712154806967
EPC1	1671.74807065315	0.355340891337563	0.0136021113009086	0.0485021237397283	1.87502097620372	1.95729801202797	2.29287864751734	2.66819962554825	1.9989710999646	1.98373599221198	2.04087108893984	2.13906148398457
EPHA2	3633.65231863053	0.620905140944436	7.18892717290752e-06	7.28316404596061e-05	5.25438592598293	4.07096037736642	7.94783466751484	6.70266101645969	3.70909453843954	4.14351460318108	5.74489314741808	6.30235471597114
EPHA4	1991.95200003098	0.743992237212828	6.84040816695299e-10	1.48263654580191e-08	1.4357160051989	1.46033587850822	2.63722057429609	2.32617856575392	2.40879600081724	2.47059496297783	2.00837533338816	1.85572859857329
EPHX4	296.39468120213	0.566697096912733	0.00857325194276193	0.0333966683542209	1.17551835268702	0.937101412807955	1.8715355909681	1.42211522608729	0.616560956128923	0.760836912081917	1.22677690572817	1.3987736477993
EPS8L2	1400.38852201666	0.452409791274091	0.00581201110165445	0.0243442087797697	2.87493126870287	2.02235509454135	3.41313794455995	3.40252405841968	2.9187367350122	2.68989544387352	3.47346162637964	3.9989152973354
ERCC6L2	5115.21818078514	0.494620511537611	2.06351084275556e-06	2.36116617159636e-05	2.19998551293911	2.24273509830165	3.20483178880679	3.13368247933737	2.28180134241069	2.10797498774572	3.05124200659419	3.12976971249816
ERF	966.505758435461	0.474472299579871	0.0123864652843418	0.0450341244544954	2.2331719826013	1.4143084913841	2.73138639586829	2.46941115060463	2.25120560633246	1.78442674871008	2.28747566860525	2.64435766473955
ERMP1	978.997194552421	0.367023849374886	0.0112421860164975	0.0416576892803091	1.13213148854476	0.955910969572496	1.3585895997345	1.36516657234062	1.7947056854048	1.54436954781624	1.54057157497142	1.47076089617294
ERN1	624.38608130752	0.820917328708855	1.45394283114062e-06	1.706994513123e-05	0.777318308986326	0.670333542636978	1.24191758971196	1.39961918042853	0.824840287226518	0.727038457495376	1.12493693125513	1.06909351166127
ERP44	2936.56918212266	0.462013293786379	6.58857381304439e-05	0.000529788708807523	3.3109817560526	3.30356442256605	4.50911913054193	4.71119524990904	4.48220723937678	3.95691778263472	4.59385687213607	4.4653853582881
ERVK13-1	806.959969709984	0.432787139627752	0.00260669815813084	0.0126228401678194	0.542234716372713	0.528588632460731	0.737389522161179	0.731988478523656	0.432486664668093	0.388241590317007	0.555054449522492	0.585885283599282
ESYT2	11191.4405113362	0.322654423430903	0.00441937555059509	0.0197133507348825	10.6732084322085	11.0864449161126	15.0904078725163	12.4996134997157	11.7391674218485	12.3818964799919	14.4835087334128	14.0232577230558
ETS2	10997.1365042403	0.377700010044677	0.000436713736761346	0.00274723408823126	15.2083024135141	15.4004920427585	19.5293445763785	20.6291931235969	16.4982041605573	15.7575725344714	16.0360475881728	15.5952826143864
EVA1B	1681.11554937047	0.522646924413386	0.0111543111411575	0.0413774158486439	8.84001464762056	5.42007560964467	12.7375265261601	8.60607911315306	11.2287990896953	6.89366865763332	10.4901700186708	14.0116728297302
EVI2A	190.182809692525	1.5868149535848	3.83988017479696e-10	8.67018019434539e-09	0.195583556757309	0.162167673709519	0.767317659287011	0.540987466522238	0.0642566416072538	0.117353296469639	0.439196382650165	0.356174195905944
EVI2B	52.7009681072386	1.26734378217908	0.000195161511694083	0.00137266450177972	0.0700215885625334	0.0727409290323402	0.337284817219404	0.216952451030147	0.0465353362376743	0.0813515976475166	0.17137426909217	0.122736223887017
EXOC6	2301.39626225737	0.352959118754768	0.00175587368352278	0.00905728130039879	3.34002457352258	3.18626929844787	4.39229386253669	4.04211357811848	3.9094319843171	3.74641150446778	5.00549489949799	4.91542795556697
EXTL1	118.541422458193	1.49747955898901	9.52199212018251e-08	1.4357295811089e-06	0.0795461992638646	0.0887391888011732	0.280900355794369	0.324990993508762	0.102151091535677	0.130811337552006	0.259309961561902	0.301708576049984
F2RL1	600.275018119312	1.86035381283594	2.3372843291126e-25	2.55768076059333e-23	0.551293855729555	0.52969438915841	2.45892137564199	1.88624334389117	0.305318277177089	0.373486895978334	1.11851998073575	0.992443571834569
FAM107B	16019.8049770095	0.522701452583807	1.15567323176321e-07	1.71763521534037e-06	16.2143741015116	16.7727435691666	24.4313517272424	23.553223502197	12.1009463893871	12.8382321815921	23.0649565687143	21.1802884140854
FAM13B	4657.86544640137	0.866649907558752	2.59199824683132e-11	6.82038449190536e-10	3.55767722089708	3.96453084373635	6.66585448626838	7.39477069964296	3.95509227265205	3.89501998881224	6.41168588568266	6.58972826092214
FAM155A-IT1	883.049122413557	0.674234122648107	5.83792314103595e-05	0.000476511228017569	2.35233012379003	2.49322580835969	3.58789189923184	4.36670951146476	1.49421050231332	1.98122217487706	2.30828906222154	2.6991266848807
FAM161B	308.35273091263	0.649208161003736	0.0018984191774059	0.00968761803554934	0.477260605024386	0.377873642486865	0.65997699358919	0.734794647607461	0.574428644721932	0.461944318710044	0.614821870288677	0.614668160287977
FAM167A	933.320913897587	0.994869239789414	1.86822439394129e-11	5.00351186694177e-10	1.00438980320213	0.946009329201269	2.21938024426133	1.82726873864214	1.31745425255578	0.895673128092576	1.11560057426048	1.09946422253635
FAM171A1	1791.96308653155	0.514410889156046	2.82689075778207e-05	0.000250056883577518	2.48820385433129	2.3746606923194	3.45995027423923	3.57918539971642	3.33746719057488	3.52387499022052	3.68916015188168	3.64733174825221
FAM198B	225.76739004991	0.67446079729458	0.00237773781040181	0.0116930260242362	0.20061328638036	0.226614332882325	0.390486745724361	0.339715147767653	0.90306984001737	1.08643629020062	0.886855430930876	0.780236955011461
FAM210A	1234.77072384309	0.565038938943036	0.000115825669583252	0.00086310863973195	1.44072133720619	1.49409346327121	2.4972608788243	1.97178283281144	1.72235941102305	2.0448201297644	2.34305319123157	2.1133499785241
FAM214A	1610.33490811808	0.618250171861402	0.00020460892911336	0.00143088715938893	1.66229683824895	1.8599066741632	2.43080635262553	3.11987400173821	1.66020020459854	1.58223717715723	2.32539317092307	2.32463558993092
FAM217B	1044.49458244768	0.989465581011232	9.29386053379929e-13	3.0216217240297e-11	0.835611788689898	0.870568627443337	1.74918829638193	1.75016045100866	1.61311747344582	1.66426274488548	1.76449976175866	1.68147026710798
FAM227A	76.6662487657019	0.792772947130307	0.0114955538968145	0.0424917645406984	0.0298514155061756	0.0331023493964616	0.0552846970117175	0.0753611542373943	0.0485304455914272	0.042381303382907	0.0469258759091729	0.0415129601207867
FAM35A	1957.65881043122	0.576639371099456	1.13236648559346e-06	1.35413410412481e-05	2.75351287810454	2.82414488833067	4.2906118161244	4.1687613679501	4.03101224907704	4.22043773002885	4.15376578837035	4.07555501432185
FAM43A	677.440593426227	0.544119909776682	0.000489241752082616	0.003011831905743	1.19927277199391	1.07386175098704	1.65958390728508	1.71978963129796	2.66657094437917	1.53599546015596	1.23928934879594	1.47506548725883
FAM71F2	167.31747240699	0.879386553797582	0.00148351867275761	0.00785922054408407	0.107750910407978	0.13454872890051	0.201062583122932	0.306095546105461	0.1060884422285	0.0949121111919392	0.114602013795838	0.209854959422865
FAM83G	575.929354041581	0.435132324290039	0.0127098770158126	0.0459026146933997	1.22938074048741	0.941039220126571	1.55170927578801	1.44311256905364	1.1802782741749	1.18276664811015	1.35097124325412	1.53361408134372
FAM84A	642.655166364542	0.701169671839106	1.12742406419434e-05	0.000110176376215523	0.516730226000783	0.477615089313414	0.804387721098405	0.855178987021418	0.365331322974029	0.374179988050038	0.780926800796781	0.830220398210315
FAM98A	2917.71975711816	0.568704071447116	5.37638752023815e-05	0.000444200618272578	5.27812927081393	5.54809732395988	7.45413996345805	8.89184738029403	5.11274541359592	5.4301311074815	6.66038512007485	6.21080835088191
FANK1	140.043708775932	0.963635987785675	0.000236812771974933	0.00161762259644493	0.469647113101714	0.417357203296876	0.905091905817274	1.04160074221431	0.519348356101591	0.456716553786371	0.762104195628502	0.740417942211311
FAS	2539.1213075543	0.469346218388035	0.000114002751103921	0.000850931130618398	3.08956340367006	3.38298442096484	4.57840603711915	4.52520680358461	4.76022698266362	4.00762264025888	4.61079344894964	4.38762295821927
FASTKD5	791.911047541201	0.431979287348217	0.0049868964616152	0.0216734494355224	1.42892466355781	1.61739027244947	2.20417511391747	2.00864725892633	0.934973412061342	0.963688241081218	1.41177759737869	1.40769924661006
FBF1	374.020852269001	0.572292634006562	0.00279376225456085	0.013347098019405	0.454227456047082	0.372177354356534	0.687952081655413	0.587359810226424	0.520837227953987	0.524372784378845	0.498495603141867	0.578474469375708
FBRS	1114.76307474626	0.464039349167383	0.00353487307553806	0.0163062242561802	1.68325387646582	1.28457248313286	2.0098487953639	2.1455189722128	1.6290341277578	1.34789984589526	1.72554865931339	1.9750312371282
FBXL17	1461.49226233638	0.374582112080717	0.0026386899217742	0.0127458147114272	1.57346588914077	1.61228298073609	2.15434541360328	2.03604740322537	1.53837319953785	1.61011284522692	1.85410480862623	1.72699244464808
FBXL19-AS1	119.220099998846	0.715983623480722	0.0116589994982554	0.0429137703950698	0.131323708238009	0.146917897665926	0.21633600037334	0.294934191795261	0.11161237155714	0.157060288905887	0.165374073219964	0.0837484751224796
FBXL6	501.024110778434	0.456857869830807	0.0112384560415117	0.0416552803402153	1.71940170914392	1.3236559044026	2.23913632337974	2.037438006756	1.63846935323212	1.52303820773143	1.99336503919401	2.12623179734023
FBXO22	1811.90100682327	0.435698845535684	0.000227873537815804	0.00156525627169058	2.32744432541197	2.33477621040706	3.30520571270047	3.09358353300309	2.41090919310416	2.27348224079561	2.93302411861777	2.99494129421652
FBXO28	2606.90379999024	0.952273745318322	2.33677479358923e-16	1.1247287929998e-14	2.10874041064492	2.10195153924804	4.46393538230986	3.89347283466774	3.32537491814526	3.38019061804219	3.63223744382119	3.35321519731069
FBXO32	1408.292262063	0.601319912446492	9.1472034330746e-05	0.000702931400183716	0.994072681853069	1.08735103045146	1.47928426179284	1.75040472213948	1.50141110387907	1.12566506456755	1.00302223019244	1.07851348959543
FBXO33	1515.62323615894	0.366194830675359	0.00357014422659758	0.0164630755761105	1.63555961476323	1.71024148391618	2.27987650334977	2.1003010422606	1.72339582404191	1.71135013805276	1.96395333964544	1.90861132039325
FBXO36	253.494935038525	0.596638893820106	0.00418263795554558	0.0188190879403706	0.478522312600972	0.43818980606249	0.726795268250973	0.720390251200351	0.467213122705958	0.603672883514985	0.663945924944655	0.70997405337899
FBXW2	7445.01446099044	0.403551927094272	8.77991458288225e-05	0.000678561969905614	4.46547702566208	4.6308956881147	6.16000879426525	6.00828811352238	4.29103698174075	4.10100883449633	5.5133411983162	5.3736342038609
FBXW7	1907.79148944322	0.432361574623027	0.00115248938170476	0.00634436785474838	2.02537096897304	2.17165788959627	2.7550212577979	2.99000858442597	2.19636610328133	2.23961871151934	2.36990512600045	2.42740542946502
FDXR	1017.29080858514	0.808117163654328	9.31012968021179e-07	1.13440994526905e-05	2.16225524599823	1.71691353518001	3.24459565293651	3.74548184731609	2.89291514389135	2.31768723217564	3.57752221648105	3.74424865837218
FGD6	1155.65847341104	0.468126614958829	0.000474648781139046	0.00294208284367809	0.710110732200304	0.649117102348289	0.946699700297787	0.959371963211678	0.71134482134845	0.630083827766794	0.946427070850279	0.96687776832149
FGF1	7240.68363347204	0.686944956206772	6.10309405240005e-08	9.54269908193187e-07	7.11197016057173	7.10519148789928	13.2572760721242	10.1974224800224	4.08787152598421	4.71015668404199	13.4021232803705	12.2799221066652
FGF9	307.845833570407	1.04927939842229	1.61742782579267e-05	0.000152046278793884	0.286346562499102	0.254823167252817	0.485763787677812	0.750331152072701	0.541384191809213	0.394097309133499	0.690995176539701	0.737746418236216
FGFRL1	1207.2430725189	0.850762521897806	4.11819562676946e-08	6.60718812005421e-07	1.95122716784428	1.47534955311781	3.38775956919307	2.9930529379838	2.37090134455275	2.27685128933555	2.81183686453834	3.16068142213769
FGL2	2816.29625418196	1.75463185218113	1.30019752908509e-20	9.30432358776501e-19	1.69963953165582	1.9581739411959	5.44771387595901	8.14546392703198	4.3051046550127	2.97052853993363	6.28919743279058	5.98207351853796
FIBIN	3557.7188514616	0.509642062072448	5.87123679487688e-05	0.000478336144473767	5.90051304817841	6.76969271132651	9.79503958228056	8.6158115865008	5.81846562658908	4.85443782332943	6.66717193902106	7.10010040647952
FICD	446.94387587444	0.956674545239658	5.91615467206432e-08	9.28259767281554e-07	1.25103683138905	1.09072341510733	2.51696455163283	2.25674455447697	1.47138757719394	1.2085351265586	2.05701023052667	1.97211375896774
FILIP1L	6807.5932545138	0.496114579292262	0.000452544852815014	0.00282971296085208	7.67870293751997	8.68691998158861	10.6925254916261	12.7901340818529	9.00747131745978	7.67332809901966	9.41293155162124	9.39864323190638
FITM2	678.89733122951	0.633036831351928	0.000183242416847198	0.00129824708635849	0.690789902549608	0.772384888052605	1.09971095247065	1.23849525988711	0.755465884578548	0.9302058246845	1.03736360451113	0.936108243967107
FLI1	974.018117377373	0.457377400919152	0.0020255264564709	0.0102373861449062	1.13859138090792	1.29270791302546	1.70299117211535	1.70680937021277	1.4701649231067	1.40593892502894	1.85379174488444	1.79783941252318
FLJ32255	634.078259440482	0.639136586608965	4.40387619509101e-05	0.000372690886336684	1.16091428590855	1.15476734161962	1.98075492208291	1.74099149603399	1.13565870172269	1.15918611811135	1.72935416837675	1.60707829568666
FLT1	5514.74490315001	0.614479212823609	1.55771734760052e-07	2.24846607537854e-06	2.35203448825361	2.36279727503887	3.49411078130585	3.83064586331796	1.79466178380884	1.89585640876087	3.11874533724798	3.04661457981699
FMNL1	401.307033795249	0.542069835519601	0.00455280398094178	0.020123096026875	0.594502909204241	0.471281786253744	0.773629515781791	0.819910226122382	0.757829301694315	0.711012504351318	0.717369258031028	0.656601153784925
FN1	437851.145561666	0.47466646492382	1.6317658804971e-05	0.000153247107304535	265.924112277645	264.7783199761	354.820762110099	390.953341082079	200.716269957323	207.783304515419	288.362981538185	281.984112727744
FNDC3A	8663.77748210228	0.472145394961206	2.2290585606396e-06	2.5322722042777e-05	6.99165405008744	7.12701484923446	10.2956454786017	9.53647678430988	10.1709736398364	10.2294796149397	12.003719964249	11.2875107127544
FNIP2	3342.10949594891	0.658777325680289	2.64265354678304e-09	5.15012812971767e-08	2.36674199616605	2.18776461494489	3.87365692045994	3.43987569253967	2.60044257715093	2.74186439564123	3.53746540000882	3.45424530276209
FOXC2-AS1	52.410518887653	0.872847026685122	0.00903552519208482	0.0349658020666515	0.56302625286175	0.682373762160746	1.73878996151468	1.33782668111724	0.582056399963387	0.598548542529211	1.45283118614919	1.20323718257788
FOXK1	5008.21732902713	0.512487150260745	8.49205206452718e-05	0.00065970708887266	2.62670118724818	2.17557576409389	3.29155654174184	3.6466078479602	2.36498662326738	2.37498242527934	2.76516796043399	2.95379622003135
FOXP4	365.596716527884	0.69182248550535	0.00104104519127733	0.0058423801709651	0.335453903854799	0.265004345017994	0.45090600522016	0.559654679914068	0.404446359219811	0.306513398451524	0.412510070372081	0.469442511474745
FRMD8	1982.2049135206	1.15311358085233	1.54501340748911e-19	9.81047245835219e-18	2.29567579510769	1.92735871825443	4.8798298919928	4.77851289619002	2.08726676761064	2.06411483456665	3.1678578567849	3.61500437991507
FRMPD4	1527.13622130953	0.324392776228461	0.00927527868163395	0.0357292908509232	1.02904437934443	1.05821002171351	1.33414368745401	1.3115165885074	1.44311080290391	1.29020620742138	1.50695309738788	1.49086275126616
FRY	5254.54851454278	0.844912646035378	3.3482078407498e-07	4.49697229852443e-06	2.18145310584	2.30565118592176	3.48719765080189	4.85426563180176	3.02833031909196	2.90405230623228	2.90235551831124	3.04244870692233
FSD1L	1157.49906465117	0.511485022586327	0.000337506673246945	0.00220457822971004	0.740427092935843	0.822759972821819	1.22399346417034	1.06166879983657	0.612297363675554	0.660070874043832	0.831242244308785	0.711474740287123
FSTL3	3004.8523831054	0.712713448755346	1.14384174539032e-06	1.36555766114914e-05	6.61628719885228	5.11467804764134	10.9869421045246	8.77277037678084	6.81218666868739	6.70294513486262	10.0847376040885	11.0191320716725
FUCA1	42.1871401842035	1.2910520411338	0.000207102035612602	0.00144235583504657	0.0565330105958131	0.0436014711106803	0.240419695912461	0.184346619501388	0.0913184566750868	0.0856421793264766	0.190119172620508	0.19059776900608
FXYD5	2688.35018106864	0.377561447864572	0.00125187528805779	0.00678078224708914	9.24937269045402	8.30319509214612	11.3832642940013	11.6317029492787	8.38602750967951	8.50377774205008	11.5864379331251	12.2081177972422
FZD5	162.428153321956	0.794929755099862	0.00101954991464969	0.00573364349090936	0.11400909929343	0.110540945627299	0.221645736895009	0.203809827064634	0.172079364538231	0.139624851968423	0.212973345176903	0.259106605358597
FZD8	479.90763003006	0.677157309228393	0.000202602096292594	0.00141831954055763	0.751644171010245	0.737060757537931	1.13591353099022	1.32335623674503	1.36712156392844	1.29149153427179	1.13749267686507	1.31691401621126
GAA	3603.6184584808	0.610918246501778	0.000289731826965634	0.00192845618095975	4.79393613314998	3.13089425424578	6.71132599554456	5.73801030394303	5.59873889547937	4.76521934153652	6.4858692276697	7.21787186575188
GAB2	896.760924137957	0.578477110931717	0.000361209525325447	0.00233637438069185	0.731234910385436	0.759481851385025	1.04111829350033	1.235730358738	0.678618554888359	0.710349270934924	0.977111812432402	0.957225731681985
GABPB2	639.126424820436	0.601807764864622	0.000270175198339519	0.00181887484198208	0.945053882952767	0.910088915474402	1.35482601630592	1.52747666437754	0.870547599803878	0.928503291814893	1.15134566912097	1.0833216872828
GAN	663.757780370632	0.525868647828934	0.000542599324673354	0.00330272541233443	0.768557819004479	0.780985580782861	1.16664360378887	1.11769950167597	0.83426162593784	0.943339637929153	1.05503541556794	0.956843653002898
GAS7	3935.93951996969	0.390397358404467	0.000355866257921041	0.00230733036355804	2.48552578350901	2.5178228511273	3.29053273274562	3.33804708584203	2.96612306301194	2.52653773052026	3.49835071446221	3.47964101182969
GATA6	703.799040548133	0.847713352566604	1.25397212075495e-07	1.85557690735347e-06	0.864097185657482	0.845497715897619	1.50506759072394	1.67286882143633	1.36249265543601	1.0972808728681	1.55130929338969	1.5966154404943
GCNT1	388.6142624691	0.544356988626467	0.00772969102900528	0.0307935408445645	0.320771617198211	0.280776305172458	0.538624871221142	0.382449830399094	0.367308139335431	0.453258656320249	0.476050972331094	0.533836886629656
GDAP1	50.2714025517441	0.95285871738308	0.00438808237088237	0.0196000046453712	0.0513143552078221	0.0424034436930266	0.128597557106319	0.117519633304221	0.077583822661615	0.0859191884461127	0.111355818461279	0.12592376788614
GDF15	1980.31406445995	2.39261656071987	3.35658136088136e-40	9.26484957263682e-38	3.34504490179093	2.05573834852525	16.6326153361725	15.2136202337822	4.47931716662317	3.08447166726955	7.21201069910303	10.6906634592159
GDF6	382.510705622739	1.02029343172162	1.0181005354276e-05	0.000100144070848424	0.464096575356326	0.374585921359198	1.17535473721587	0.715345664429638	0.866119755245681	0.875170875306266	0.842350720533263	0.828567735379819
GDNF	387.545866343885	0.863593376369468	1.24546075877756e-05	0.000120148764354255	0.379458058563884	0.446483414338933	0.893860254093372	0.716681923398209	0.216496163356389	0.20550500664929	0.597849309787617	0.653708026841821
GDPD5	198.457899169815	0.584070912333118	0.00975149795512033	0.0371623020126803	0.333231283943625	0.303420553348939	0.507077471654958	0.497777204159417	0.524054009025007	0.538401391413996	0.821037889279111	0.777706704492287
GFM1	2827.03058435234	0.415543117910477	0.000244100425530507	0.00166152906658284	4.05162416819959	4.24765695475553	5.78842278038126	5.43693462331598	4.06777007887571	4.55736435409485	4.79648016810801	4.63072162542374
GGACT	136.902379652179	0.965379087586959	0.000215313713961679	0.00149339383658036	0.216541099317996	0.170417146939904	0.438519562472092	0.413918554238903	0.325130195398081	0.249934737600382	0.423978642996887	0.476445450008017
GGT5	23.6761090868451	0.9747364226423	0.00700762094932276	0.0284789119056148	0.0308322174435257	0.0178346689479376	0.098340848965352	0.0935253538623909	0.0239057540348037	0.0258122614033938	0.0498876300267022	0.0204489903566731
GIGYF1	3099.04288185241	0.586288869897539	2.98396504422662e-06	3.25206504618574e-05	2.73533931145984	2.35856864640666	3.73691508014887	4.01664925050676	3.30533971437575	2.74986667543696	3.35163193698899	3.60429327317155
GJB2	725.090521598947	1.62386782366479	2.86500396864469e-06	3.14267466957984e-05	0.581911829477658	0.588347417574846	4.95982710333694	2.11558501326147	0.242180306352691	0.282475385283243	1.76256329102185	1.75377495007814
GLCCI1	1412.55932726308	0.675162678451881	4.73385566196e-06	4.96320913395419e-05	1.40521626327116	1.51798383268905	2.70532888041391	2.11926832281059	1.91596600959156	1.73090173193266	2.41892891761657	2.50877337452369
GLMP	2508.89708335786	0.36975709209173	0.00277632911892016	0.0132872793111802	8.12908652955311	7.28406035041246	10.9892369468586	9.22076809118941	8.75215033283683	9.15486624780126	11.3491861313344	11.2298886805101
GLYCTK	474.021952063771	0.608867530564595	0.00145678014808518	0.00773574852879941	0.693213726769081	0.579778268446402	0.906908736570689	1.09041363892757	0.700356810376999	0.670791776484744	0.87772188153373	0.865539168046482
GMCL1	1334.56516555331	0.549840157403483	3.14658367682511e-05	0.000274946298711963	1.62444783309768	1.69667677114633	2.65087462156579	2.32196110863531	1.86913538621702	1.76659633604179	2.1394072857878	1.97625870427664
GOLGA1	1814.90459340898	0.416440561171413	0.00186394717042632	0.00952394615792063	1.98457848329093	2.15507294611125	2.70257409519189	2.90271941536009	2.20590076036923	2.37009039226735	2.56002454344738	2.60672635426771
GOPC	4172.88787847848	0.683272501044156	7.01328738562912e-11	1.72777252988404e-09	4.49843685069286	4.49778743382303	7.63483219008372	7.05099482508359	5.64311353298197	5.7070639798446	6.86689696093073	6.12150492281895
GPAT3	739.169243132887	0.777814012807609	5.90257194310263e-06	6.07089623805803e-05	1.11322823294746	1.26191661628883	2.41484623283619	1.86139819749343	1.3900281711138	1.31342689933027	1.90589848500189	2.06778080503587
GPATCH2L	6260.37987882419	0.327127214281061	0.00209737349039057	0.0105453444080046	1.44302762984862	1.45973275649792	1.81335772056542	1.86171664190217	1.21400004515439	1.33017954102715	1.50722211911984	1.49365878441394
GPCPD1	1419.66013499331	0.509076080402854	8.05155373975781e-05	0.000630803980287795	1.34893210499704	1.43549739597985	2.10543555122418	1.93667575113576	1.55608657541045	1.61591659829401	1.58799288377261	1.51655494316305
GPR108	1779.3742172609	0.585144129454416	9.05356277575313e-07	1.10619722168071e-05	4.63817133776752	4.27995604869705	6.93364397482387	6.65264797125613	5.12785333224007	4.58028027761443	6.49967459115659	6.10457400072327
GPR137B	742.422767481562	0.445549850917251	0.00446173410167617	0.0198699222012414	2.0767299007436	1.92526087254103	2.631720208847	2.90072468921414	2.43233730410753	1.89814926388659	2.90955798746331	2.78388544029833
GPR176	24641.6567458574	0.347562364683919	0.000840470581900772	0.00486616636139038	29.057127378489	30.1319382066899	40.8367402615266	35.403941716506	20.8908159225662	21.039833117974	33.2112429821721	32.3452466693338
GPR65	241.952598079239	0.678726201985652	0.00142575075104608	0.00758885435178991	0.258167831779929	0.262567524581977	0.470536450095433	0.41431581814375	0.337039016133156	0.259677677611883	0.325947139253735	0.36586712207974
GPRC5A	2235.31060252037	0.616265562222372	5.02552430596004e-07	6.51055711093004e-06	4.07032718993239	3.96100696173936	6.83491197866022	5.73918530802982	3.22648126386229	3.39882567244512	9.03663153085185	8.43532149006807
GPRIN1	605.335621874982	0.566465967589108	0.000424748005586871	0.00268194060483773	0.791986099722856	0.710103304301784	1.11933994117609	1.15371903043063	0.61038923090267	0.587603126572077	0.812480196860453	0.904286499501555
GPSM1	3808.79443126578	0.448605522459133	0.00522311547718858	0.0224476125926201	5.19076253020464	3.54285385351945	5.88639199710331	6.22753714420106	7.8058346818037	5.81804652287804	6.01885149207808	7.48951197534147
GRAMD3	1662.36122001319	0.478270803614476	0.000240335968941281	0.00163920523445831	2.44059888462414	2.6884154753616	3.64910298022813	3.62327654685443	2.15636224588256	2.2020747282308	3.59351435945554	3.51594391746449
GRAMD4	399.492506866937	0.88013704990161	1.57808924153637e-06	1.84314827217438e-05	0.41779028008692	0.38049809410463	0.751338322521086	0.785327865922705	0.716789277104133	0.622990385574363	0.637927039832998	0.7015757113561
GRASP	390.83934568819	0.903662838505087	8.06193173351544e-07	9.97599512312867e-06	0.840259062750401	0.811121475180868	1.74899166275566	1.51480532082905	1.55100160437612	1.29727520954489	1.43227343683698	1.48188158275381
GREM2	89.363236499843	0.798361302464916	0.0129848816372954	0.0466331715731335	0.0811031787199317	0.0977693859562532	0.134775762390461	0.243844778171943	0.170154905033523	0.130090941295824	0.0672031857679949	0.0711932112569986
GRN	13748.1479818311	0.42841852166459	0.00162680831684594	0.00847230746451343	37.249783823474	27.8697034932626	47.592987142698	41.3754162226761	40.5786991420553	34.1993696185324	46.1069589919969	50.1836070457513
GSDMB	742.813718941465	1.04717699719551	7.36057382361641e-10	1.58269890245488e-08	1.51132831698403	1.87423314884247	3.63921715966237	3.74449227399873	1.70211545633296	1.8259866454704	3.24231148946151	3.11318498234149
GSK3B	5395.30024115982	0.435082104790424	0.000296643603851607	0.00196864805794553	4.13814012991224	4.25264506144583	5.44712303209975	6.03089188136875	4.24214078843083	4.20072096957906	5.15009613342571	5.24087721130279
GSTZ1	256.756940309454	0.948420388078318	1.14115784072857e-05	0.000111437976865371	0.715062672154865	0.724246357691101	1.41088222225101	1.57604056369647	1.51067744635468	1.2114016475311	1.24878247804397	1.39665696636505
GTF3C5	1625.11792978805	0.333239800073131	0.00706778795109839	0.028654625910853	4.07134947344546	3.61836072080622	5.03263625445107	4.7589223050628	4.19311308328807	4.17307994810109	4.60337544043608	4.67936524957469
GUCA1B	81.0880227733547	0.865486890591943	0.00389597771109472	0.0177477596977286	0.140660107420772	0.154010054690318	0.328470194361962	0.31467161515053	0.163591182016141	0.147198116240939	0.284491352729366	0.239057255217015
GUSBP1	318.889569307654	0.566013197909464	0.00347474936731677	0.0160615123694324	0.274339603855266	0.269324558086933	0.411685791559495	0.42206568684932	0.313332056927936	0.342642926774501	0.342729728583956	0.358455331227309
GUSBP11	855.081409657925	0.744090331402172	1.57161797694445e-07	2.2639446938119e-06	1.19760284302284	1.21652699401608	2.13483580726183	2.02283040560902	1.46984434207675	1.18217717627729	1.82155396266616	1.64089005124094
H1FX	1314.2609383427	0.457665836748051	0.0128501397896555	0.0462913652173336	5.83323509098331	3.69864389333092	7.08374333250313	6.32456749734987	6.39146785908701	5.97390766151326	5.93388618844445	7.71125727228743
HAGH	847.152709646985	0.639840906168917	7.18431587773037e-05	0.000571912138000608	3.01821316289963	2.30664936124193	4.3318904007095	4.16784194044217	2.59004553483708	2.81661701573723	3.99699436594245	3.81448607445807
HAPLN1	49.2146354552357	1.38469161839494	5.16758942616999e-05	0.000429309870939491	0.0319946869500674	0.0197408969244166	0.122458322025527	0.102874640452135	0.0644983938287775	0.0612239156905147	0.151042349608169	0.151369192378598
HBEGF	354.610845217648	0.71699183541741	0.00058747580666889	0.00354556460740595	0.651664020782356	0.788868055831295	1.14915982787238	1.34905712122756	0.380591161723303	0.41701674007384	0.866731301287894	0.951414642458209
HCN2	96.0725369706842	1.10092939114786	0.000136789635194358	0.000997885553400051	0.111257893798744	0.0948408759810661	0.264145721612575	0.269988596352399	0.238360464553669	0.120456137879595	0.222934055059258	0.271858166251457
HEMK1	1517.13926089927	0.5851520500118	1.95847711272003e-06	2.25625238071025e-05	1.31761570945879	1.2324712032044	1.96792450312617	1.91915307243089	1.34047642222051	1.24524120695751	1.7241021505371	1.66220594787347
HERPUD1	4733.78446631155	0.477316405478416	0.000232643612415442	0.00159397409215748	12.6101703970453	14.1294919503396	17.9731369078518	19.8311200474672	16.9864872637598	15.9147268510428	16.5194273987707	17.1229665969193
HES6	101.509273421227	0.801314867073429	0.00474385783918134	0.0208111181559934	0.329400045232275	0.285808542748208	0.581602834332152	0.634902235648794	0.564008915301524	0.630328423879456	0.658388354297703	0.696371450577225
HEXA	5677.83992591589	0.598404494916424	3.58184936577899e-09	6.78494575240347e-08	10.1538868913108	9.40759305744885	15.477474648711	14.5298384233797	11.0569188807373	10.768769786099	12.9851142081758	13.0530033654555
HHAT	207.074700008875	0.886497154528213	0.000568117374168382	0.0034410154436307	0.206512433708532	0.241408520098093	0.376389369612142	0.542394529960589	0.495979533310548	0.448186259747958	0.391193561249264	0.394195321298861
HK2	6060.39872550596	0.324676571526163	0.0117685403413917	0.0432290896570675	5.45256224598112	4.45455798213023	5.98680197139007	6.52409902551499	5.48633769026536	6.15773795770967	5.81521643958292	5.63068520833445
HKR1	1309.17229741633	0.328673985955658	0.0125220619818169	0.0453685744184498	1.74947591545249	1.65834895923723	2.11208482545881	2.20923573246842	1.88232188186449	1.71684279842885	1.93573594849131	2.07337021602886
HM13	4301.57903662765	0.663156529515611	1.62012461179313e-07	2.32366759008505e-06	6.33746553060384	6.04800767071889	9.28848102413402	10.6468512945351	6.90275821408285	5.72975131455887	8.64718836353739	8.5980245965722
HMCES	860.787121972721	0.361737983493142	0.0140597498707718	0.0497711852029549	2.54016691231763	2.71945653976297	3.68027357362784	3.22382536554976	1.78214308395679	2.2043048060728	2.82967388413472	2.49325250426525
HNRNPUL2	1272.42747360294	0.476848412523675	0.00213262458134543	0.0106789142771925	1.24459394397579	1.43152213442608	1.7754966850395	2.02467014032087	1.21451169939903	1.4300798084954	1.55140272369087	1.51462477286227
HPX	49.6871450135908	0.8566403539426	0.0111188861967613	0.0412799714002737	0.122958427235502	0.113799033656711	0.252116904513431	0.313301291690963	0.162070849096398	0.135291147767616	0.299596997024553	0.273193408367189
HS3ST3B1	2459.91646737858	0.736427451209247	5.30156357100184e-10	1.17162822382026e-08	2.28017522977383	2.15600623556776	3.67256827272088	3.84336661311041	3.98573000461966	2.9135569573159	2.99682819080993	3.34321679396269
HSD17B10	1163.92097330891	0.395842033861064	0.00252486282470457	0.0122881503073513	7.11831616438278	6.47983447252264	9.3668455091057	8.77212825738443	8.46757074827319	7.99040550175782	8.69423368769919	8.56947270686437
HSD17B2	1546.95130588353	0.364386606562398	0.0075982983915209	0.0303954409184621	5.76835795736644	6.49048163037089	7.91992847196028	8.10500890877758	5.71335643572848	4.0011550915327	5.34586536247371	4.94258620918759
HSF2BP	45.2060335694245	1.028087851527	0.00282469021625198	0.0134758148764755	0.0893245383321417	0.0659975325523207	0.272934140231022	0.199230796759586	0.179255389456866	0.0955187655679186	0.132027675451208	0.13591067702104
HSP90AA1	25859.0817158794	0.521439143957009	0.000117742394773725	0.000875462281096552	32.7875572821172	34.8336675220637	44.4316830145399	54.1888835859112	29.9623199484589	32.9523304370349	38.6201632496937	38.764675181078
HSPA13	4210.93328005061	0.433071702605326	0.000279866134825371	0.0018738561750065	5.63488457331471	6.06341415555714	7.78814797786902	8.21146213118785	7.49582580191184	7.42719004882343	7.5670954861479	6.38868834221732
HSPA4L	911.26665050555	0.568014827257275	5.24122090741887e-05	0.000434626074634213	1.04926408466491	1.08113911689429	1.6860817324012	1.54796754193535	1.26455341804826	1.18158313628793	1.44797168317413	1.49271554511287
HSPB1	8079.00472627229	0.699728617582375	1.33371891638463e-06	1.58094201087661e-05	51.8704237614947	37.0627086872592	74.1227821582306	73.5758133050427	49.4031995456104	50.2885872040533	65.5662924067821	74.4853447872737
HTRA1	7802.81263070393	0.455619864875343	0.000989366357104406	0.00558946532156938	20.6292022313282	19.7234985961906	25.031529931275	31.0352427730709	29.1432482080253	26.8122360633924	35.1603683789962	34.2190438560391
IBA57	566.481547131759	0.716732144682741	6.64431852842004e-05	0.000533319929358345	0.393555073065323	0.306181150351898	0.567376543717175	0.618393998719428	0.429751026821414	0.345066840482202	0.452868550452401	0.497699184651586
ICE1	5838.54374380787	0.424674077696983	3.46644567566705e-05	0.000299193859370752	4.07258174947186	4.10483132871013	5.58989405082929	5.50734042417494	4.1125705862096	4.06834152252965	5.19347264423091	5.3230528680438
ID1	272.644381077682	0.970650569895061	2.71513772886158e-05	0.000241593669624032	1.06907961108868	0.792410223807879	1.75660543243183	2.18404949758634	0.910545819139153	1.41807906928684	1.27654356124906	2.83083033579706
ID3	687.417056110414	1.89892240581406	2.96221985191259e-20	2.03370677650344e-18	1.48986612468102	1.29370134569459	4.82905953375744	6.9059896895711	1.25507379302033	1.84926862050187	3.17639464483076	5.5869439155533
IDH3G	1587.95057287901	0.406263066230091	0.00218744942982619	0.0108969626292447	5.61158212576089	4.72803565327667	6.89760439782117	6.95634851242695	5.45551194089305	5.84003430819578	6.54371875396783	7.00957238544716
IER2	2016.81037943279	0.397048227931061	0.00456246159671167	0.0201591940854379	5.18898986209742	5.86443439682983	7.03086601924645	7.74578489161771	6.85924260225671	9.30421183341241	6.00083559912706	11.3692975719388
IER5L	502.623504371173	0.949119150831739	1.40243277640625e-05	0.000134238523007039	0.946260379015269	0.635287454587292	1.95617289137145	1.35252803474319	1.57584789908907	0.764452504787815	1.34850259737188	1.96336340271564
IFNGR1	1786.16896677893	0.612545230472625	6.58328610300943e-07	8.31362694147549e-06	4.18890941954873	4.44937734540977	6.95701534416177	6.5202849270685	7.45915343566288	6.51617493848317	6.89158988816734	6.78324961678279
IFRD1	2373.89156672447	0.528991691376797	2.45096390648345e-06	2.74414626119111e-05	3.06238689949359	3.04787017595369	4.61023400559086	4.33965580727812	3.97294870836537	3.43529689178942	4.05951600548177	3.96300617722424
IGF1	35.8499121072685	1.74088630175167	1.28124330466769e-06	1.52140611901936e-05	0.00496359973643129	0.004921984604567	0.0407099351847081	0.065871781652162	0.000962131532087223	0.00118727139078982	0.0132279935766538	0.0246902294646624
IGF1R	9422.81150491886	0.753053049546288	2.0048286248556e-09	3.97585148844165e-08	3.82323024301715	3.60894943340736	5.88612092688618	6.86978791349408	4.22013883619552	3.77192229592562	6.21406694829344	6.80387109587734
IGFBP1	290.828766250659	0.956994053454783	1.49349864438315e-05	0.000141950591463683	0.65311045331963	0.823535526292585	1.77451591919388	1.38311670020376	0.858048142946027	0.451305601067025	0.709108642332489	0.613650963114718
IGIP	1001.72714433989	0.433449361836295	0.00155541300594294	0.00816018654203969	1.90455794177925	1.95292154153749	2.6699452414515	2.62715846284016	1.61143392212086	1.91203006641276	2.30494710953724	2.0814620227353
IKBKB	3382.2734918556	0.388215095088957	0.000279062162561753	0.00186939858774032	4.72808777606865	4.40329633722946	6.16335811288801	5.91102042984638	3.82482786589268	3.78499397194792	4.65799383687818	4.52672369237324
IL11RA	869.839127844272	0.484560379559961	0.000697149539023351	0.00411744432982132	2.72427743001107	2.44467383651302	3.69902310100842	3.6506422048342	3.50348065268532	3.15611299329198	3.9445834368472	3.59190047101785
IL1RAPL1	713.342855124213	0.454989848493172	0.00215702553426715	0.0107783209315348	1.45257550741426	1.46009476021878	2.10439348293878	1.97261780723884	0.875012838298823	0.987113565948277	1.64203289037958	1.72917624222652
IL20RB	830.382049004762	1.0908632851826	3.263607374083e-09	6.26103400488972e-08	1.73616578092733	1.52494638246317	4.43095665056177	3.00452427709617	1.12682155207966	1.08720228544889	3.53514572423822	3.32507479486575
IL24	246.715052257954	2.02562919541825	1.23449722730157e-17	6.7054518069292e-16	0.312602695780689	0.236652783609395	1.55302654288418	1.18376798414535	0.105551031094927	0.0771852390366118	0.307128553670319	0.30430531070249
IMPG2	101.842633022904	0.808404116131131	0.00509626426801705	0.0220566317519778	0.0489824151312981	0.0568644801800622	0.0979850900443721	0.11560366981975	0.0602098272531571	0.0502947039208573	0.0845996302043841	0.0879521431948989
INHBB	1716.48242220082	0.983069946261333	6.17182789553562e-08	9.62790914499645e-07	2.69299097041787	1.87700689148491	5.56078379344485	3.98430810651603	3.84290403807341	3.80682475687042	8.10251840703961	7.55111109883937
INMT	615.544191732134	0.541636494651509	0.000605544474906558	0.00363514825704003	1.25554536584285	1.27337325996025	2.01474805545868	1.77415841991303	1.31813749401634	0.947596604278466	1.43104323230723	1.48182961347956
INPP5D	63.1546392780502	1.76602916798114	1.49599923494315e-07	2.16863769052585e-06	0.020799476989155	0.0225001013105874	0.110281039755834	0.159451689500722	0.0366519786313879	0.0343737229132987	0.102222678481294	0.132932969005667
INSC	377.749401727604	0.928516171179556	1.26056639130445e-05	0.000121432766683709	0.490876900636015	0.518395743819725	0.883418049449557	1.16685828385119	0.380601313203163	0.454893188432705	0.430185471888853	0.42385072164756
INSR	578.357901455704	0.848517994801236	8.87970146956369e-08	1.34638971273373e-06	0.289930218212135	0.276224937800212	0.537168897012403	0.51894844507173	0.399180571596512	0.399782598793894	0.566512085493092	0.566270847969966
IP6K1	3261.04760660458	0.755615873121705	2.52574173346176e-12	7.5243737764472e-11	3.2773974057809	3.03722151659117	5.52902015965821	5.30660057486666	3.89381606633829	3.73422723648604	5.30598946198976	5.2022596993591
IQCE	1036.14036261167	0.505238631504867	0.000232136112673151	0.00159130305316998	0.790767745643572	0.754383688206948	1.10050107738163	1.12750882520103	0.993235555281035	0.906321289283163	0.910023929314372	1.06913593932874
IQSEC1	1082.20957881506	1.03139870959974	2.36023861376889e-10	5.46613480329183e-09	0.637281210352802	0.533410205016375	1.13340713787303	1.34966668780826	1.09382907740995	0.984680176658006	1.24148145826119	1.39667545484784
IRAK1	5355.74738312093	1.29154675001732	3.06206830388133e-19	1.90850109723479e-17	6.44062336410561	4.66967098399408	14.9954559846478	13.34517392678	11.2223657755472	10.7365294319286	13.0420729812522	14.0714056567421
IRGQ	2554.42615493767	0.403199119343541	0.00273341209952212	0.0131236771906413	1.45030778664052	1.50419963448538	1.84169485812976	2.11373201181729	1.02466491693255	0.938226539607779	1.26038312196203	1.2754661927636
IRS2	1933.94302365991	0.697804290768418	2.82159739615136e-06	3.10008974678694e-05	1.54276630930469	1.18766968035408	2.16605576816923	2.35675421928565	2.05296939827755	1.84443272228021	2.30489984026846	2.63463894664773
ITGA10	355.114994853483	1.49389202890607	9.54584888897578e-09	1.71230246980633e-07	0.238610290878779	0.166503169523249	0.502195437394242	0.854189430844678	0.093971527342732	0.105089629283312	0.209081595460397	0.199702204624095
ITGA11	4087.66233272479	0.765446923830159	3.35038796318702e-05	0.00029140834213572	3.79880048670334	3.91510072883563	5.36976290305375	8.25231317798429	5.27453509744223	3.78138329379684	5.35122912361112	5.20017538998721
ITGB5	28878.9742169983	0.920851680880871	1.10573435948539e-21	8.84914627931357e-20	30.1279117986456	29.0829806314294	56.7010515232132	57.1834036355317	23.5646111726899	23.1182437731051	42.1988232770303	41.3435208542605
ITIH3	49.2222596994795	1.84082671480567	2.66447994093953e-07	3.66230601638284e-06	0.0131420169511505	0.0217197224263655	0.119763139362762	0.267092335479617	0.0458534717455517	0.0440091832554405	0.127585519399867	0.111132047979287
ITIH4	50.2621663226762	1.1990593866493	0.000511740532952582	0.00312756019348562	0.0577470152400424	0.0301383477043278	0.138486389828171	0.175167746034301	0.0824786743018481	0.0901469164951473	0.120339572041979	0.141104573649858
ITM2B	9424.52869436276	0.338361340287579	0.00102889756726176	0.00578380698138627	28.33963146272	28.9213465999343	38.8803183539274	34.3761946038917	41.0450685519277	38.9829677844754	41.1335907184844	36.3944343697613
ITM2C	7945.24302129851	0.34178597403116	0.000437183886190765	0.00274891309192473	20.3943642629466	19.7859421857969	26.5163059308835	24.8996098375974	22.9580712041114	21.0265476528347	26.1861689489242	26.325899516402
ITPKA	279.073201238285	0.810857885687441	0.000225359870462506	0.0015503521098705	0.723127222066834	0.649282263689277	1.5097652900639	1.0918433825505	0.799173300733938	0.573120750200564	0.945076418159271	1.04510487572746
ITPKB	710.705953843389	1.27345773173958	2.88240741761037e-16	1.36309651479651e-14	0.427493047991319	0.428190827710952	1.06395079402156	1.10714280296878	0.497184982344578	0.58408993322128	1.16022957371483	1.29520808699109
ITPR2	3185.25855501343	0.637585200103497	7.03797985828114e-06	7.13558302723032e-05	1.27194107110691	1.29220610845482	1.83479047351052	2.23245133017826	1.60841477256035	1.35809108825242	1.72082483507873	1.7876434482796
JAG2	28.5037917968894	1.0465863773898	0.00368344771781411	0.0169048627022178	0.0102602327713738	0.014696081595807	0.0623343023555628	0.0414973678062948	0.0490574956353032	0.0425395168100881	0.0364580278834185	0.0578419930956461
JRKL	1106.45831530648	0.358654025129539	0.00660250626008479	0.0270848945003478	1.79996671775454	1.73868324888932	2.31018650840302	2.28402471378632	1.67949222083273	1.75694116511064	1.87705228852718	1.66835407668361
JUNB	1534.21006428868	0.583202298092859	0.00435780718490942	0.0194840800581487	5.13739064212585	3.55240173318706	5.45781268070943	7.98012549438951	13.2704826036531	10.0462714334441	5.41788679094895	13.727571347599
JUND	1748.47095732039	0.681563641989593	7.97891120581706e-07	9.8913633417668e-06	4.94583204695194	3.92819713211266	7.58755007199228	6.94772005871551	5.31268544449516	4.79044651785064	5.63143007019379	7.31902882250187
JUP	569.149528863123	1.54611767145301	1.18668768684566e-09	2.4503741930668e-08	0.531898597839256	0.417438453134824	1.1327389246361	2.15269443831448	0.595454648052624	0.438153571775339	0.513292316234729	0.630087429987333
KANK2	9307.4235291777	0.753565923064447	6.56416146208396e-12	1.83430338377449e-10	8.95729166034084	8.0442739047626	14.1732972949831	14.9239065172103	12.0340682543676	11.3488215548398	14.9384903882413	15.8312673246425
KBTBD8	751.063856936951	2.46951917788384	1.65846552683879e-49	8.62721009634411e-47	0.283443861006282	0.301495911146917	1.99455954671784	1.64394155794469	0.218115752613362	0.15088997111218	0.720489344897537	0.797189607081713
KCND2	89.6331562675093	1.11791203208233	0.00017891943967359	0.00126894883145533	0.0542591814615918	0.0643177469428342	0.151749194767388	0.170263318828331	0.0942944828836243	0.094877744314095	0.0698072449324127	0.0694912904995287
KCNH1	60.4782026635447	1.9175595204056	5.47571008068084e-08	8.63158261552545e-07	0.0135404441243241	0.0048825164329291	0.0616970021695627	0.114631295233418	0.01527066301409	0.0117775095649407	0.045926725539669	0.0465352648332303
KCNH6	26.818061149582	1.99614765946065	3.27069887689364e-08	5.36847115412458e-07	0.00245342423657758	0	0.0782531528065209	0.0922824117979055	0.0057067860704549	0.00234739347266804	0.0149448588078083	0.0276623251957295
KCNJ15	100.690538651984	0.932432060821608	0.00120631926503935	0.0065921083069322	0.108486831966959	0.111163180607504	0.284233998628306	0.216370168939858	0.0736008392859384	0.0544941109867245	0.105321343413263	0.0683545993908064
KCNJ2	2154.98020980419	0.524040753479259	4.72472045330006e-06	4.95747433133307e-05	2.1415997556454	2.12731857416285	3.23978804073337	2.99636844738758	3.175900617355	2.805915775722	3.31495406639174	3.32364671069484
KCNQ1OT1	7908.32928219228	0.622649532329802	2.17861799861301e-05	0.000199227913666267	0.446706433039247	0.43231172827754	0.602193739546757	0.777982875842836	0.428131718013126	0.431670759074278	0.573687817874966	0.591459374313939
KCTD10	5135.45670966662	0.378581391412255	0.00855883968668521	0.033377538194123	6.8148800934673	7.11708028202277	8.15905643281118	10.1812944189338	5.48443003711602	5.73910664257715	6.89198464470022	7.17842005252846
KCTD16	746.129743861367	0.440573169688264	0.00442074623134186	0.0197133507348825	0.783537928353373	0.801785879135432	1.05263550331288	1.13640477686035	1.0314337753837	1.13095995399408	1.6183180062603	1.6228496092631
KCTD5	1221.89556677545	0.483255026044571	0.000191742915974459	0.00135209746535691	2.6726990277217	2.69847805945386	3.98926569844288	3.65932702660839	2.82897166567027	2.96014319381188	3.24377735853626	3.30084486024155
KDM3A	4288.6712579321	0.341709187170091	0.00215532003108457	0.0107766001554229	4.90179595573587	5.1262669818607	6.37139779649892	6.47130957500359	5.34224335293765	4.89377937528924	5.91988101453429	6.122612951202
KDM4A	3581.77324869237	0.391245195984407	0.00151581194594744	0.00799273160582419	4.27094419924834	4.67254765239161	5.77161517214658	6.109143162574	4.81793990149335	4.71519922093374	5.42059334279921	5.31596538348502
KDSR	4110.67853154752	0.384420776852731	0.000259560984786351	0.00175879875713196	4.56864597171666	4.37933075178179	6.2101208280527	5.60914553841706	4.19420084885122	4.43731969912883	5.7646989611925	5.46433569294602
KIAA1217	1114.32192883823	1.03866054896557	1.80326087009898e-12	5.55560438908628e-11	0.512472445493154	0.501028504748286	1.01186778608006	1.14063411111545	0.423332140319021	0.477911404815636	0.857805990407319	0.916410678983629
KIAA1549L	1356.82498951519	0.549631117331735	0.000141384036079085	0.00102697050911365	0.65432824389524	0.577316390344431	0.860002149343665	0.970528171174585	0.528638616326472	0.70656543527308	0.73818261973818	0.762015699362359
KIAA1644	254.019475212848	0.971619357266707	0.000709108425116183	0.0041718264630061	0.139139471709707	0.159500606919539	0.222570493807955	0.461123802033772	0.509569180297275	0.305907052176478	0.313326026079903	0.322005618954234
KIAA1656	215.533960704212	0.675187367972221	0.00218390344488832	0.0108913326298357	0.137764368029836	0.137910384278904	0.247502220344033	0.221282462983646	0.174974088062629	0.134321218949044	0.16983441701398	0.217547814075553
KIAA1683	112.857820705372	0.853549337638211	0.00471141903595447	0.0206956617282508	0.0943234768279906	0.117286989955006	0.173960474965115	0.277942700847091	0.149749936947591	0.109585710538012	0.18981156385383	0.199591673094733
KIF16B	820.196678574028	0.474286403399105	0.00111131414435282	0.00617523574460638	0.701308921950157	0.724471321615214	1.01033515067975	1.00890475479054	0.743179601298113	0.707683510133981	0.967032679179239	1.02986006693265
KIF17	682.932729260613	0.692157598362556	2.47904490079926e-05	0.000222987805464437	0.90333487880179	0.738821957712843	1.48000046596645	1.26002306857443	1.05343260234955	1.00640284954692	1.72234346561097	1.6762520925664
KIF1C	12727.0591311052	0.45889843169069	3.20073031004014e-05	0.000279469835011574	8.84377439553111	8.79587278037973	11.7610821632747	12.750659864257	9.10653533330996	8.88723998953171	11.5513732579388	11.8271208702311
KIF3A	1279.49319291531	0.366029369057394	0.0137621585470565	0.0489566529060862	1.10203742484368	1.18789155476825	1.39826437113139	1.59371026808413	1.39079031039778	1.36125706227722	1.5465715510594	1.4347091535764
KISS1	2722.37059238114	1.16786171566621	3.32267298360961e-12	9.72708919985281e-11	17.4266964055893	12.3703340609075	40.3454843363879	30.3137726954083	8.72252411464741	10.4961858037432	27.1555410449057	30.002567479027
KLC2	1118.9938302957	0.545326683359143	0.00106230847498632	0.00594295865860231	2.10610972634172	1.50529968089993	2.66198123365086	2.71746906268912	1.67083779521457	1.66463875020016	2.1382028720422	2.20053640135878
KLC4	553.950313041495	0.608274249453794	0.000287890226394442	0.00191808636058366	0.94395573601089	0.816350992758684	1.34251730319852	1.40633311663421	1.12064061300333	1.08675362158068	1.1452946655893	1.18849528781615
KLF13	552.38744533874	0.489693711565957	0.00426554907809029	0.0191411915332353	0.192613435476223	0.223178914490217	0.30063250763242	0.300419343662886	0.128163268095265	0.160164044050855	0.236791458150377	0.232268865091195
KLF2	951.313829353642	0.698915031742305	0.001324680180795	0.00711246504376831	1.30567606416837	1.96213968935937	2.36021804595691	3.26153621480732	1.6485354991455	2.82958099071134	1.9421804456346	4.51676396084249
KLF3	3924.97323173737	0.657899967390949	1.35905044739961e-09	2.77242191569829e-08	3.44745648408056	3.59711637473137	5.77969285395978	5.52301235133601	5.21507589909315	4.98340430303513	5.63967336453724	5.64310738486302
KLF4	929.867051414038	1.15348876189486	2.92269997372299e-12	8.6120952384757e-11	1.08493637347017	1.34617953079331	3.10908755970302	2.63483121977082	1.6384089254406	1.92597862153382	2.50626507195372	3.69968261173704
KLHDC4	488.528480872614	0.457351438069114	0.0134406864701539	0.0479897794373896	1.57167627799427	1.19621652606763	1.8986971976764	1.97912611483782	1.25066730085397	1.330623030647	1.58644031935599	1.73845952519089
KLHL15	876.991642466074	0.959837695391067	1.84651311416901e-11	4.95517656133648e-10	0.605743641974402	0.612751922501154	1.22718050567746	1.22206723166311	0.759350507345479	0.926391203837575	0.980568834145924	0.982758731340696
KLHL28	1731.35840822041	0.828209500500614	4.29638014543776e-12	1.23903514144036e-10	1.20129534921921	1.1708856494454	2.17746434838174	2.12372154888152	1.18813370039509	1.15218177745503	1.89967702124541	1.59445267822003
KLRA1P	248.561797422792	0.594178055883397	0.00622053090735333	0.025760159375981	0.573920153537341	0.570602093690877	0.848352069456636	0.958185358150257	0.546600518715618	0.544793028043911	0.846470914275002	0.75529290536818
KMT2C	8639.18280262672	0.418057235862059	0.000110911400079566	0.000831528096494527	2.88418599384206	2.83457731660709	3.74085247671621	3.97680313884197	3.34520335337456	3.21700850773829	3.73121007537363	3.99336738405969
KMT2E-AS1	570.288985968913	0.551445735608648	0.00339362355837622	0.0157457147948674	0.909113624836892	0.751242965934377	1.11389450362442	1.37799574425142	0.825226629281425	0.662975642593119	1.04888986678347	1.02024486106083
KMT5B	2374.43173633556	0.389697053183847	0.000767099685352256	0.00448552669450465	1.80021015388082	1.822585803207	2.39192815967663	2.4094184690413	1.74003231229926	1.65268691429218	1.90915973007134	1.91177041126926
KRAS	4322.88488808292	0.434336200103345	0.000885801233036367	0.00508940597995619	3.6852294286127	4.41768163360488	5.77944646305802	5.37500047152292	3.59696655465573	3.59405073775799	5.02119721264473	4.56132933986413
KRT17	26.2892655715373	0.982379608587878	0.00652940721421141	0.0268419069918375	0.0570538038954569	0.0335261992421205	0.207972419834967	0.142297875199174	0.0393214721703347	0.0303267130029889	0.0724039955186105	0.172382455318495
KRT18	3475.60328986154	1.426119649277	4.78900530757677e-39	1.22209993933917e-36	8.24247611554669	7.57175559150701	22.077962188437	21.5813600153404	7.15689218391464	6.94712092246372	15.6158987893835	17.3226960897645
KRT7	99.1300456406711	0.882945001368462	0.00277813146211919	0.0132888051924021	0.263815180174645	0.220909484694813	0.448774015225552	0.592183225637927	0.618192686447601	0.684321744364038	0.388361078665393	0.361607414153105
KRT8	1881.60793475693	0.568861862275282	1.41855276825217e-05	0.000135685475181122	4.71370495190829	3.98106593868116	7.04156763294945	6.1001989478395	6.73229174798712	5.72810955200455	7.80556201848488	8.40300474791033
KRT80	556.594855866565	0.551359357453508	0.00101264963270023	0.00570105845911738	0.771289416388922	0.723320860883112	1.2422919110053	1.02056390064714	0.401328435850462	0.505046467947671	0.837022913164863	0.924521225031591
LAMA1	11434.7652568802	0.482258600902454	7.36939705499506e-07	9.19475047682732e-06	6.64068518494613	6.24723766638857	9.15610345313128	9.03375636760727	7.74210755026375	7.1969620549158	9.75563303257763	9.57412723701725
LAMA5	442.798231357737	0.930095602372117	0.000606471717459175	0.00363909936940344	0.219969840370971	0.10329228120539	0.280005402620369	0.411999597179796	0.437212734982559	0.249716378860024	0.229303599489523	0.31551950439832
LAMP1	18984.6509810028	0.535180068325784	6.79697845328799e-08	1.05061866949394e-06	41.9786315321026	37.6169730186422	60.7442132010258	55.9811060731947	54.7128910252789	53.1466332449766	61.0230262045491	62.0562471183148
LARP4	2982.22689542102	0.575962241665576	9.9034500515384e-08	1.48992393711965e-06	2.34211128117797	2.29060641909804	3.56718747789426	3.43705519035749	2.75326002095064	2.86391285762479	3.2764406306248	3.06541977627764
LARP4B	4353.5701388493	0.43313232974618	0.000164526941826892	0.00117736872391996	2.83369896447236	2.8149581171467	3.71870959099362	3.99111198750338	2.54292388432986	2.80171986044688	3.31338960997608	3.37162658684677
LATS2	6734.97508306025	0.669871414270815	1.10245055177454e-09	2.29394518657703e-08	6.27342524806262	5.923918519036	9.53429750347397	10.1421956966333	7.12935959042292	6.88930128330573	9.94416999585489	9.88432319864558
LCAT	810.672404901191	0.911394832112446	3.10775490174884e-09	5.98751923734374e-08	2.80034639635243	2.54302659074086	4.96287968033309	5.40069546729826	3.01689203466991	2.78508526962309	4.97715260932358	5.12220023661661
LETM2	355.649442160978	0.937177793936384	6.39743108916456e-07	8.10920857365986e-06	0.355854872908435	0.372345500357119	0.743075970528279	0.733445638933701	0.259466922586419	0.259302707636799	0.529355176179443	0.54705516685461
LIG4	1228.67715568165	0.643107022641538	4.33163619833237e-06	4.58414550723359e-05	1.33774026633931	1.50672596473434	2.29412878222529	2.26100280446861	1.26987999297568	1.33033459521991	1.74939976451074	1.59368157136893
LIMK1	3315.3629437609	0.335929500722831	0.00781518583330661	0.0310792085843787	5.99929719363056	4.85834894588885	6.95257291437703	6.8792082004181	6.49462250781609	6.10554312713663	6.69475898952793	7.00631429781558
LIMK2	1599.34735329488	0.405307350747819	0.00135955354858856	0.00727947812536037	1.7465154848356	1.86222859069209	2.45157549266574	2.40049752001888	1.71454186626642	1.69221223909794	2.29199405610882	2.40477590573288
LINC00116	328.975063001993	0.554915745372042	0.00913352270045331	0.0352610674908212	1.24494837972361	0.867824321364408	1.71301419926863	1.51803087255699	1.51002710886116	1.01424216897754	1.54392091675233	1.68408613694964
LINC00174	79.4837095310393	0.989870984287845	0.00125883300312109	0.00681301175158571	0.06089693987214	0.0745510816103889	0.158264525185593	0.177196879401503	0.0856890783965087	0.041001386937947	0.113345640000834	0.121166854619902
LINC00472	1229.46133959049	0.44810235309754	0.000575364885715539	0.00348023706587776	0.743791787969137	0.67169643791575	1.01625033817981	0.943929811878783	0.554051464706393	0.477092937072343	0.690256975043238	0.530669739122298
LINC00540	37.9809343613133	1.0202964942073	0.003969173502324	0.0180167070591414	0.069874484384881	0.0400334435628075	0.1528238043045	0.202063557331999	0.111966148055515	0.0713116657579154	0.145425441854902	0.151387684736106
LINC00565	205.225721058825	1.00252836908872	2.19557736816387e-05	0.00020023724817543	0.366426533367495	0.314108557185105	0.686196149553678	0.804925222042333	0.29035289241515	0.300506150831554	0.573345365427947	0.646290835355592
LINC00842	315.842468078875	0.632860736561176	0.00419355990469862	0.018855684079471	0.590624297676661	0.509879559051867	0.766194275132483	1.01382281418019	0.818905255380244	0.74460105597088	1.00789790363365	0.907874294793268
LINC00959	25.6823489935856	1.0001731310743	0.00563353599092644	0.0237881905330253	0.0261499567918858	0.0246959180115583	0.0817043775914734	0.118983525929997	0.072412014690316	0.0357426029702019	0.0796452986520954	0.0445977091258742
LINC00963	1029.01503289905	0.612506834968975	3.07201549162469e-05	0.000268925627988505	2.53919002822193	2.4153201355275	4.31939702496073	3.47601444970483	2.43907552569483	2.36196788784354	3.93485120804197	3.754871170137
LINC01000	2766.19142379736	0.508194280017256	4.19820389810237e-05	0.000356886912142266	1.51474646640464	1.38314273763123	1.99527163928453	2.17617894931289	1.47523431882467	1.42416702785394	1.9314156761238	1.96090261105002
LINC01004	1277.20838834446	0.875835740462584	2.05556349031767e-08	3.51472771258489e-07	0.610189190913339	0.617679020722213	1.0503452378656	1.27443983145747	0.657097326638782	0.563546892967146	0.904225639726754	0.869820785239705
LINC01021	1895.63647285177	1.29050870488428	5.5757758430451e-26	6.33717380480546e-24	6.3603470533124	6.40542893196462	15.9579970589733	16.2638000661488	7.45669857719823	6.1458921052249	15.2020546255664	14.6896112637955
LINC01125	219.980434252847	0.704079899899037	0.00233838361842007	0.0115383576939553	0.677838643115394	0.852842590983957	1.30849103152315	1.37296534563534	0.615981345359354	0.564861058817103	1.24869125945536	1.24718302562309
LINC01128	513.393031823769	0.594803710033365	0.000909874746055225	0.00520781038527166	0.295030309656012	0.276482209925631	0.408708089222231	0.477298382857694	0.265620100606058	0.302959691457694	0.36864740422354	0.333291356486833
LINC01355	552.078448015252	0.725853835719828	1.66992370146937e-05	0.000156345127177551	0.713328729396301	0.802224845422626	1.37521836659029	1.23792699619415	0.658847449502846	0.791265489240162	1.0927895930481	0.840655314401463
LINC01410	120.667585946726	0.700857122499166	0.0105955591660268	0.0397924377207048	0.20115690979122	0.192592108055101	0.319219552300275	0.386098065701907	0.185546915473209	0.192463419080213	0.240313147818623	0.253026936204246
LINC01497	49.6040678583399	1.14080211338081	0.000703235149332424	0.00414253283742205	0.233646416381181	0.190801478951283	0.726439323216017	0.64619932641543	0.266408390134757	0.144649231111226	0.376740128748076	0.410194494060641
LINCR-0001	24.9928644426698	0.939617051524877	0.00931876274190632	0.0358464920603763	0.109850382056818	0.145239186074581	0.400426408342799	0.544253207171412	0.198735770813187	0.122620082153003	0.306691811231614	0.206426929488132
LIPH	38.8325321677646	1.14452474510427	0.00114418985377272	0.00631639500909228	0.0403317557403436	0.0453260933367351	0.194797844330735	0.133351598551539	0.0531610727735356	0.0733185674266279	0.119768032037333	0.0695484709412436
LMAN2	5685.66610362343	0.438768617360003	0.000711519092076409	0.00418404161753627	19.3406927895424	15.0216587948152	23.7401185760432	23.4091235872716	23.0110188811126	20.5424016139028	24.0659551512132	25.1418773739526
LMO7	18897.6945887664	0.529887862563358	9.38159103444268e-05	0.000717681101475324	10.732675181615	11.1009860559218	14.3707257406152	17.6547353799392	11.1139573855142	12.7422908532622	14.9628757783022	14.5418872858952
LMTK2	1623.52341472019	0.38990776382732	0.00250437924867072	0.0122148320729432	1.06975687411788	0.979302341283199	1.31744541056776	1.39475865821575	0.91852013725916	1.0064481661152	1.126261350794	1.1667163446718
LNPEP	3079.41575197611	0.332187192086902	0.00415923944909551	0.0187387453527704	3.8455651995949	3.56983228859277	5.10119165755093	4.35670111630719	3.39308837600137	3.68733364279195	4.1592660199377	4.05763195876628
LNX1	193.601635283626	1.81144311513367	7.18309073221684e-10	1.54946255427803e-08	0.116719295628132	0.127973472085686	0.409899168121712	0.785823104301906	0.0993273849438234	0.0898847433267476	0.173411528591601	0.171817463589224
LOC100128398	122.109865722737	0.832658225869051	0.00258596976181477	0.0125427873616165	0.278775987147356	0.281654536516534	0.498510121790324	0.627042016814997	0.240618597428196	0.246597582189618	0.444561295836883	0.422116154457342
LOC100129917	299.645971475426	0.512619115206597	0.00993871096394499	0.0377587263447629	1.00954655039276	0.861396525645271	1.40674311862292	1.35133889803416	1.14227141883991	0.864832226479119	1.27371405292916	1.20288328928889
LOC100130357	33.9128382607273	0.995083277607969	0.00537614778212816	0.0229376652218559	0.0313995410249822	0.0392086555647142	0.0953812904487874	0.143927671312777	0.0513963263429209	0.0934656570257153	0.0610995208802969	0.111068047622573
LOC100270804	48.0530355459218	0.892989948429992	0.00812959597537136	0.0320741255621529	0.0939927868284875	0.0850288905419274	0.211884863032986	0.23409391434902	0.141918932588991	0.0899306573195228	0.116770139062472	0.144364599991991
LOC100289230	134.812844723194	0.703919511306476	0.00643033434868617	0.0264991688196162	0.356359870362893	0.323484932026452	0.591336884566292	0.614700498254579	0.395897636648871	0.356225718408243	0.595333748226903	0.416258492267081
LOC100506606	28.6095585363052	1.21125007843106	0.000774430406329648	0.0045264352833226	0.0209447446896747	0.0304614091980518	0.118339003794983	0.144855342627357	0.0617101147526254	0.0320633056367453	0.105256320605308	0.138912772967639
LOC100507424	50.0341201258265	0.880301587452941	0.0119957704013214	0.0438849863883882	0.147907631484713	0.255728061379892	0.393996147699514	0.690242705671979	0.176431006830407	0.239487666560434	0.528452848781746	0.573492750647153
LOC100507487	138.347059433397	0.698133624144332	0.00678736737920222	0.0276836983726508	0.303974280135466	0.328538108893319	0.545229220579593	0.576656392728443	0.564899152358084	0.530893454610351	0.639255856758703	0.732822645772166
LOC101928464	145.363941240095	0.681015956682204	0.00890135658825386	0.0345058320023312	0.286451953210364	0.372421533351527	0.587347946447796	0.577827268652765	0.259117213141596	0.237529263719487	0.421684565160127	0.443297909370798
LOC101928841	102.055995127921	1.06965285817916	0.000228048409989125	0.00156566230715884	0.0445591927216122	0.0357692998134235	0.116986175341866	0.0885004170868897	0.0172744808761064	0.020301646471751	0.0444303660609329	0.049255323263422
LOC101930370	114.619293245346	0.726670465572479	0.00874228120555762	0.0339768256624042	0.175001037033365	0.14361419366915	0.332704862137963	0.260844743074059	0.114632138743923	0.141456187908589	0.250419592685131	0.224128849249463
LOC102724814	284.748384101154	1.26707072392891	1.84855887321339e-09	3.69299642225079e-08	0.329015153037667	0.304912775079532	0.790209741887581	0.877700500084345	0.300400294557375	0.344216136407053	0.472947212473573	0.495570568417669
LOC102724919	23.0603943474469	0.939026615092232	0.00938810171142851	0.036031235995196	0.110458410001782	0.121702577507144	0.4026427906768	0.480253554863395	0.157013830525179	0.0704564520541765	0.336424764417101	0.476188884987002
LOC103344931	429.039488504976	0.551337918552279	0.00972086699664408	0.0370978346866849	0.482772163295494	0.566685346028545	0.682459098712636	0.917229434848517	0.509436724619832	0.565555620153073	0.740572514118779	0.724725345749055
LOC145474	51.771952408628	1.06357745315098	0.0014915342732851	0.00788932383503365	0.081210605291598	0.103793874837618	0.27629349752718	0.275902331206963	0.172108782219234	0.196842252646205	0.222609875315602	0.251354484694782
LOC148413	479.933068369052	0.598246111330603	0.000698484153504882	0.00412172695294656	1.50127808086519	1.30944454016468	2.40850490439503	1.99991703395265	1.79692154330802	1.28893388088585	1.72988664380719	1.6128059031922
LOC171391	232.208292668947	0.68125440165953	0.00236608547540366	0.0116495471622987	1.31478227962285	0.997190394005421	2.05266252778551	1.87044139933078	1.525173066758	1.25796072898976	1.94014111246668	2.0346875952581
LOC220729	514.956693442134	0.441478443706405	0.0121491012212444	0.0443619314301649	1.69241766854728	1.99573099005232	2.59034847079975	2.56487770667772	1.66686862127694	1.96938933516856	2.22404969914835	1.85055829946572
LOC283788	2062.72158299081	0.518600716562295	0.000115704590658531	0.000862681691651945	2.94001758694804	3.07298011188246	4.12438562739256	4.62602942045002	3.45205910084785	3.30307427743936	4.09133058441816	4.12212235773642
LOC284454	656.822501686389	0.719597365913867	2.22172716331844e-06	2.52936531009107e-05	1.81675234924578	1.78850650288994	3.13693687144535	2.9789419986431	1.32139762897551	1.87815692751746	2.24415925621411	2.42478744516117
LOC339803	610.644883822053	0.549248519071389	0.000484411621786245	0.00298889926307435	1.22284177911527	1.28361433490248	1.93680536324512	1.83214575282636	1.46914734926154	1.5064135666	1.74322210708764	1.76975743005239
LOC389765	98.9722604780923	0.749889219608722	0.00785132761025277	0.0312045859326091	0.2601992704237	0.24679958064544	0.500012804162936	0.466704240311271	0.390333599096762	0.335546855843048	0.521150059051453	0.476451911582
LOC401261	258.153874038501	0.562793311548254	0.0124419821219054	0.0451510083710145	0.519994504713201	0.451931699623468	0.662756294177677	0.830581574734634	0.456746699424622	0.414021523741826	0.517765967758911	0.472700321727024
LOC642852	1930.4715549556	0.844890616130256	1.94929359924639e-12	5.97827572104476e-11	1.31601984226129	1.18208278240603	2.31608581296788	2.26084783571765	2.35604218216862	2.06126668456642	2.3063173617882	2.19084888819414
LPAR3	1090.85673697299	1.46511385343588	2.63343711368862e-25	2.84937895701109e-23	2.05823190668632	2.21153596014638	6.16063746149522	6.20819369740374	2.15776864135178	2.36868369039894	4.63978490344969	4.95277873409744
LPCAT2	1924.5940700387	0.344112464039198	0.00326298200331418	0.0152178729637325	2.08339567862493	2.02246734704263	2.65466123388515	2.61270379428219	1.23628919788994	1.49723229752655	1.95862214484535	1.8018409813715
LRGUK	31.7306746905969	0.893046962642262	0.0127083387936849	0.0459026146933997	0.0224586927945746	0.0424198051504001	0.0994091820282967	0.103161322194017	0.0472647888555478	0.0214880851361371	0.0952752769325921	0.0553256968194973
LRP1	79591.5048560861	0.472270728983161	0.00659570046255591	0.0270651846954092	32.8382460981179	25.1680325368685	33.8545067584367	48.1515516006639	34.8090519560923	32.4052946680268	37.2173850118805	39.8917414980508
LRP3	256.272339353869	1.02020988570128	4.77936240601406e-05	0.00040066146360312	0.353468903323713	0.20691412798889	0.582759566360168	0.676058946017026	0.615070550826643	0.400151875140033	0.505410432319958	0.705087878487362
LRP4	440.553429918545	0.658056854171282	0.0124668851132233	0.0452171148180064	0.247420393765996	0.26939953561421	0.292895263689218	0.587168587083641	0.284934896536106	0.206556359194686	0.365703983005	0.366806716166929
LRP5	1476.5110817227	0.817181478602061	2.56844997455841e-07	3.55197197401867e-06	1.45579630956394	1.11889070958446	2.18279955494326	2.47938390608436	2.2950796643802	1.74778857991296	1.9870408434499	2.22653949412015
LRP5L	373.857325359468	0.522072086646765	0.00481612180379773	0.0211007604134643	0.501649162181682	0.488368882306807	0.714158863386935	0.748729466599184	0.547631165785963	0.537278909955404	0.674623654759613	0.746530723207711
LRP6	6081.30662142446	0.394377519383815	0.010015883169129	0.0380266919934963	3.2465359550276	3.51727448945563	3.9216112785359	5.09955130421201	3.90891171303754	3.47072088087543	3.80859089398063	3.68166236299489
LRRC14	1139.56704228779	0.381805229508061	0.00766472331723477	0.0306068446606437	1.30372363320102	1.06943732360722	1.64658227722117	1.49052031127318	1.22724746004426	1.13494012102654	1.47365892466437	1.48456085583242
LRRC32	238.105351339618	1.337611125761	2.35854785653373e-09	4.63653484878178e-08	0.204229633307389	0.163200802316148	0.56243353529743	0.479263797147464	0.584674737345139	0.562589857034485	0.712594717208039	0.797827983409714
LRRC42	2150.11437570647	0.353248266609415	0.00702017601854979	0.0285128770723381	6.45673062655273	7.26402389879582	9.54563294207661	8.30145791525641	7.70621133992354	7.45914340431614	9.50123995838594	8.75711714590936
LRRC69	53.7118773974969	0.923304261712635	0.00556454201983574	0.0235778292037213	0.128214133252258	0.169518903877676	0.419254722390916	0.350028180233453	0.175430831054725	0.173185473983509	0.361790123639025	0.295125068591475
LRRC8A	5300.17166176747	0.733743205685328	6.56636105916873e-11	1.63253737730252e-09	5.86280085756206	5.00608039458345	9.30878931878915	9.05281210992127	4.64319949565501	4.36043618773971	8.26130501139444	8.34938459913974
LRRFIP1	12250.9356723762	0.347982043761416	0.000596262037038934	0.00358898266620008	8.89464700486886	9.19303975295396	12.2515322652285	11.036818359623	6.80688551434734	6.90743344922029	11.0371819887777	11.4400410552739
LRRN4CL	1478.95283664601	1.32551769845516	2.66734786849655e-14	1.03073942632617e-12	2.0380751734797	2.04140184166722	6.62365562807338	4.3790759569632	1.94534807434572	2.45226611381755	5.18164632397974	5.93682346042149
LRRTM2	185.200920865713	0.975124495899158	3.63516738925426e-05	0.000312361111433697	0.143607708952211	0.130097200923682	0.285974394995174	0.303854577002482	0.181453083464066	0.169631294480116	0.338840750124609	0.372751248725041
LSM11	822.801881505884	0.434596015288755	0.00321493617726611	0.0150456788226727	0.710771235966816	0.668244009795226	1.02752189686385	0.877121934450344	0.707377398087339	0.651053358862405	0.93585170043989	0.910651713363544
LSMEM1	59.707921828686	1.05112355106574	0.00115249682901725	0.00634436785474838	0.121549103069514	0.109572752506432	0.322233137758325	0.315073245682096	0.197053700928912	0.169157904821102	0.243997990361203	0.267497081287386
LTB4R	403.933874794734	1.33863713814834	6.752950402315e-13	2.23309667949414e-11	0.328283032091877	0.289836532311711	0.818765109122289	0.858224174529617	0.355008209025288	0.351290989841549	0.531173681524569	0.548618858246819
LTB4R2	77.4663491751448	1.10322368911522	0.000366923279173668	0.00236368792365116	0.179093678438787	0.169135376945826	0.431335391251738	0.521914190458953	0.287639089533189	0.220311905846329	0.350658119834747	0.411491690323909
LTBP2	17815.1712382546	1.22082872826772	8.23654948101115e-15	3.39632108934987e-13	8.67861681014706	7.21010231509182	16.5585592447096	22.1023739214372	9.24870767078835	9.13167180159404	14.4535450457722	14.8215920845275
LUCAT1	207.41228675441	1.90513088930138	8.85671040111115e-15	3.64094249772123e-13	0.454897436102484	0.496845646449384	2.55037029611627	1.91381932672854	0.268362227683813	0.246004044189161	1.31018940711298	1.42325428880743
LY96	827.880497822503	0.614641172565494	0.000447894942050944	0.0028045273570551	6.57092834132554	7.05748299704681	12.7006521136669	9.08506427972361	7.61070290724485	7.46672274936095	12.1685019633711	11.7829202147565
LYG1	23.5921439524836	1.1029248443309	0.00228208290883718	0.0112935131145345	0.0503943251018233	0.0533032703101997	0.220436760148309	0.299614139301434	0.140663629991152	0.0482164103704087	0.191858398899483	0.200539530429647
LYSMD3	1921.74661455275	0.599088007719741	3.46386771241929e-07	4.64309324187026e-06	2.33883113416022	2.31844837914806	3.75497625217438	3.42866646372272	3.54332410038716	3.72734799567323	3.52783569880672	2.96574533152994
LZTFL1	1016.07184275712	0.422141520208391	0.00363523010812499	0.0167119263128452	1.21133935552686	1.28739973781162	1.64576747074616	1.75675484551477	1.56992327845685	1.52064346768988	1.66460325163024	1.48805307304852
M6PR	4179.52101124615	0.392728786135934	0.000306330126453531	0.00202597308571345	9.23924764438915	9.11551356950353	13.0441906495983	11.3814364524247	9.50329185318242	9.46499785678071	11.9648759478298	11.6030796821116
MAEA	2364.23158926776	0.404895864083886	0.00120512146928877	0.00658822468558229	5.34816053505861	4.45108870181684	6.69305079885521	6.42771766811737	6.10295302732006	5.75489288693456	6.24298306372457	6.96225280063059
MAFK	3347.71040880059	1.15243134887134	1.97487552831449e-12	6.02938860506851e-11	4.75075576430054	3.14455483054235	9.57345333970962	8.81361123849111	4.96983499873216	4.59103705884544	8.16911299471736	10.3731616272957
MALAT1	656793.123194327	0.781257702368393	2.87371211812518e-06	3.14712197551766e-05	334.527239182813	372.463293895452	517.776156241552	738.252305958705	401.164603583553	401.136764930373	452.720496150196	484.9804829819
MAMDC2	684.508976245639	1.02693399951793	1.70170678640025e-07	2.43551156466279e-06	0.406991558266255	0.550437344176686	0.953499505731584	1.1352750478362	0.617973289475064	0.558143464165411	1.08592375485874	1.05610442376333
MAMDC4	434.804770389447	0.558618828354481	0.0137269156357348	0.0488629296773258	0.779707607067226	0.45056555333929	1.00619443284909	0.889820914880839	0.858201873689187	0.563420611672579	0.938281927208095	1.05414754806994
MAML1	2109.24421337062	0.327003971307994	0.00649774800426193	0.0267525241271363	2.22296826349035	2.04584946165906	2.65974303339876	2.74112528957507	2.00340598996659	1.81161598621846	2.46925078269095	2.50003378263735
MAN2B2	5249.44803347308	0.382522692256795	0.000815627526207149	0.0047284021825768	7.70989855153797	6.49862704055889	9.52725782489126	9.17987693076609	9.40276581089374	8.65781601341662	9.64937798957867	10.2427432655406
MAP1LC3B	4707.42996280877	0.322194406652766	0.00723528404882947	0.0291849736833936	11.3605283847331	12.4602800993158	14.7085898312901	15.4074042994477	11.7332402901273	12.1296725434712	13.9167441309415	13.6983925401174
MAP3K3	3222.80348497992	0.353857383794266	0.00104442993242705	0.00585894435341179	3.89478817422642	3.73135276760225	4.9559004881856	4.88449922796363	3.26428516810322	3.26509342493444	4.44997368927009	4.5909139466202
MAP3K5	5741.6650094177	0.487175676537615	6.33182213096769e-06	6.47790426031301e-05	5.81590283904669	6.16329964737373	8.58016673295267	8.43692959814543	6.87126263385075	6.25736702745444	6.94386326232915	6.64200821651316
MAP3K7CL	5320.08644025691	0.547533771262337	4.91959979299209e-06	5.14598508895731e-05	7.02837183496135	7.43611531228883	11.8185777020365	9.74399172068711	3.84232856304439	4.88168786562587	11.7801848092938	10.5611972912042
MAP7	96.1048612530739	1.38783576385343	2.5611098513005e-06	2.84626218067701e-05	0.061930375426337	0.0433490451317889	0.184250605244445	0.171834270941872	0.0861494119423722	0.0679677110040701	0.144240531220816	0.13530377956699
MAPK11	448.260615740095	0.470137073501895	0.0135576744918082	0.0483564207546693	1.10411457983271	0.889995780292474	1.60090950243455	1.2562545013373	1.49574448180637	1.37449495626052	1.40950812874751	1.52718565481039
MAPK13	173.493964717454	0.81497505282237	0.000620376735992471	0.00371429630557688	0.12260396296039	0.123654266604533	0.233484824519091	0.237445447961101	0.0987171505372687	0.0706839815543515	0.17713353879491	0.172012876998964
MAPK6	6585.62612009595	0.388132657745172	0.000130143551594199	0.00095619074865717	8.74764375741453	8.85853041960569	12.157739501943	11.1555016626734	10.4099409485168	9.80218510319359	11.7713233458372	11.2526171734952
MAPK7	822.888387882084	0.452223028480754	0.0103939898794569	0.0391802433443853	1.59889657497761	1.12057281665674	1.90350794201862	1.88896143246326	1.72673079526789	1.40039626095694	1.81930304643178	1.85976253084289
MARCH4	1462.88003541213	0.580509624005493	0.000175342272121222	0.00124750354047319	1.91489375732978	1.50454469582034	2.44796260553462	2.75737070286799	1.47775836001941	1.74632253757742	2.83245081291236	2.94008977635069
MARK4	1035.42037407892	0.551515593107266	0.000140504091699584	0.00102167625819187	1.05052415722466	1.0278772679048	1.47590252127717	1.62390753875212	1.27933343431777	1.05610768013308	1.35345250525574	1.56388704571371
MAT2A	7761.87973000378	0.34719343015735	0.00159563345586563	0.00833241022802419	14.548871833139	15.086301711111	18.5792769325599	19.4924023433035	15.6660257373878	17.3532881970242	16.251670124743	16.2142814947683
MAU2	2568.25791468996	0.427803658512582	0.000152385221998343	0.00109979195705848	3.04914223304117	2.83668570693419	4.01344344422093	3.9896746649877	3.10703437397518	3.00392310114395	3.77766143316718	3.73504358890263
MAX	1796.16816858939	0.367576898039311	0.00322089232732136	0.0150683392345283	3.54505907257284	3.18628327994782	4.70669137695656	4.10106328544262	3.85169162662634	3.84137299558202	4.40044958086992	4.41477508247129
MCRIP1	2339.53845069908	0.468249512171377	0.00862878899905772	0.0335743300380483	10.9962474283407	6.92586158601247	13.5851328107234	11.8107885967211	11.4005842829563	10.58148316257	14.4145739901105	14.9913530604856
MCTP2	2688.79795290578	0.514812369216927	1.77591434178534e-05	0.000165080697406507	1.72255794114033	1.62874890545041	2.34249293712589	2.50490337689626	1.91838569546756	1.91447511764858	2.10651689635673	2.12643706690873
MDGA1	303.65322299344	0.691927793030897	0.00168361539037124	0.00873787342853838	0.168037662010121	0.16292596095152	0.242970460621536	0.318744580664712	0.174585879594946	0.131835910874698	0.237984544111491	0.280849904859033
MDM2	18102.2711132294	0.69531660501688	2.99901538976597e-11	7.83044076188894e-10	11.552937333277	12.1863324652478	19.3711899002238	19.6642404996168	12.0961424791069	11.2214915480116	15.9916017069119	16.2597663343242
MED10	809.03645855333	0.408290650116758	0.00483165870711482	0.0211482796160932	4.51342948650279	4.28629848267768	5.8910008688467	5.95921174230367	4.73371427971197	5.37706781875914	5.38039631341772	4.750914128486
MED15	3009.84637709528	0.423016036132888	0.000908063077304572	0.00519964145662335	4.85483318819795	3.90539725304552	6.11742233830224	5.77202077786409	4.46126696947649	4.51038137876566	5.62725844958103	6.53830097657525
MEF2A	6089.8114844919	0.361010879980971	0.00149147949510925	0.00788932383503365	5.87475509456822	5.75051799400314	7.22637909678764	7.84152752745427	7.3963626706063	6.56884512316136	6.75045213138913	7.07912588135025
MEF2D	1522.94114992567	0.524492531062587	0.000851019164860879	0.00491251993373597	1.42778665662274	1.24148653023449	1.74882975530142	2.1540357402625	1.18474307163633	1.31734886782475	1.61509831088055	1.78821294110928
MEG3	16180.6639371555	0.63161195570989	6.94825046471217e-08	1.07155173928429e-06	8.08198690756204	7.53263056218472	11.5377271981477	12.9982297073138	8.81713497483575	8.43288453966917	13.6543844987795	14.1224085898762
MEG9	497.3848795791	0.625521170513391	0.000337573494545619	0.00220457822971004	0.986468913868191	0.924478594442526	1.43972758971864	1.590171471471	1.32458251575001	1.16081007966759	1.80730611763313	1.95526042168905
MEGF6	113.041857014958	2.18979128316673	3.61246598399491e-12	1.05298712141231e-10	0.0335329895488675	0.0124140228273183	0.179684554960251	0.174140839514862	0.0696794564480972	0.0577508020433313	0.173624242692744	0.218843918272331
MEGF9	3774.43861848001	0.452622954030158	6.99864179333913e-05	0.000558775857467011	3.25372055548729	3.42241758393858	4.94185671528137	4.34218959441012	6.41718352570746	5.42832926144071	5.52507699926418	5.65230838810981
MESDC1	644.359452079582	0.528841845993713	0.00139814579043821	0.00745659377589777	1.24603313570349	0.994522668767	1.73753803199496	1.57238351656146	0.874825427427764	0.700915841608773	1.09319670594172	1.41422764232195
MEST	6905.31793171765	0.48161360019459	2.90196425725881e-05	0.000255694244817104	12.5157187980776	12.4140755939902	19.4798528586511	15.9214427543724	17.2245140135608	18.4874989696512	23.6490224336024	22.647499855722
METTL15	1230.32527205153	0.684400761473455	9.34428579792456e-07	1.13754694344671e-05	1.34441925730204	1.41306172940202	2.48328299942889	2.0801806595036	1.9954422782599	2.26132344180131	2.55317649752866	2.44421176320536
MFAP2	804.703855472375	0.493903262747881	0.000754645454769644	0.0044171271808033	3.83314518138213	3.56221578395442	5.2358424674068	5.35475768918217	7.17636125921639	5.19628336702287	6.19973910338152	6.34722987368382
MFAP3	2911.63629184377	1.3548864268085	2.2808734855124e-31	3.80849554216731e-29	1.8944533325315	2.03218718057636	5.35783792027139	5.02131103829255	4.22714468317032	3.88409972428292	4.77372119928417	4.48490567127537
MFAP4	2406.51543452172	0.54282972123479	0.000108427849505484	0.000814262445620026	6.53841312374141	6.42809306904409	8.75915751999306	10.4306654760956	13.5793124903748	10.7542019381082	11.812881094586	12.0679596669769
MFAP5	40.9762731529575	1.200372735706	0.000720823432845327	0.00423323357760879	0.0299043247856973	0.0373415767282992	0.193790558372139	0.0997817889353283	0.0437963683122634	0.0858358074725957	0.204930070033294	0.143242521735462
MFN2	3477.09328857236	0.762255250778351	6.12951798025485e-13	2.03190516379772e-11	3.66524165147244	3.50052730759078	6.29531472335027	6.0586057179917	5.99467067133556	6.69728723545255	5.96338730413857	5.7858034247563
MGAT4B	7658.31584108257	0.40768397900521	0.000376644343984151	0.0024131287315896	13.6980122327084	11.7926365801258	18.4370420684595	15.8163563740761	17.6935974471655	15.3730059956588	18.1516838256399	18.7985720109785
MGEA5	10459.2621904423	0.364944095113549	0.00112043702002488	0.00621061913763793	10.9889272442623	11.9093154461232	14.6725834858232	15.1486990748135	11.586902877616	11.4976952272551	13.885104347205	14.357658906989
MGRN1	1630.97738979487	0.470753975062349	0.00161836394985338	0.00843832101365156	1.53734231819665	1.21303860980618	1.83940015610541	2.0238900667495	1.50521604987441	1.48270491417209	1.63669356813612	1.9860572318211
MIAT	2055.64293502225	0.749796163119921	1.58270819847906e-07	2.2772477004712e-06	1.00045330196744	0.94121520233616	1.92254386867539	1.44752022660216	0.502952250611592	0.546578917283488	1.96151143435009	2.04974520339571
MIB1	5765.74651309861	0.405110880842116	0.000121285756213974	0.000898843754955613	3.30725202987149	3.44948127349626	4.72281783981907	4.3399672079701	5.34689408200923	5.04235698517107	4.80299362633483	4.3157188566498
MIB2	992.274581529982	0.656620062620905	0.00428537855555243	0.0191983255925295	1.83703812298991	0.904358436887167	2.29996832286805	2.26199043092798	2.45256130467225	1.66148299820315	2.04076354016865	2.68304385186189
MIEF1	2248.8937565704	0.471912199048862	5.1451998862625e-05	0.000428238944379695	2.14121810518477	1.91311710704173	2.91342765718463	2.77990065483059	2.49412080150208	2.48047882548013	2.70518442233029	2.64799572765406
MIF4GD	199.434969954121	0.655541101475897	0.00449313423572975	0.0199571890109179	0.679535430351479	0.673838162634065	1.26379657486	1.02643263447766	0.74730608150268	0.557286544322889	1.05067472320187	1.0577449867693
MINK1	3336.26882001187	0.353515368326863	0.00853780194453229	0.0333257637228858	3.97807349564689	3.43308410261417	4.45041172829962	5.10262823627049	4.32355865617559	3.71358921896488	4.14280209058207	4.36567208129042
MINOS1P1	151.066702784237	0.735173871011683	0.00856093752276618	0.033377538194123	0.240488256073118	0.361321193081026	0.490114378528694	0.639297228495672	0.277998672769542	0.317949405457454	0.386205408056383	0.429200292120243
MIR137HG	149.484280233671	0.81793228419929	0.00121429714672841	0.00661965695667142	0.250563278635068	0.285865503440637	0.559796875710772	0.494032340438139	0.300811651013885	0.274534749691051	0.427730000365457	0.469062692681737
MIR3064	358.539906977215	0.54480523500178	0.01292050470516	0.0464760175897046	24.9451909254025	30.9825258678036	51.113773759389	35.8161187950642	31.5320970563499	25.7475631377982	45.7006706178569	38.9046689033514
MIR3189	32.198043814548	1.4672292934027	4.57718254217074e-05	0.000385709619207846	0.683429888367192	0.722879967220516	3.98597977254476	6.13635220721919	1.16577391978968	0.915451298265568	1.56114916364785	3.26357482397836
MIR381HG	222.229762347127	0.960646649801721	2.19214562284349e-05	0.000200059173744658	2.18343788805876	2.21945411112205	4.38604318353914	4.92108130983716	3.98657276057276	3.16730763463781	5.32725316172475	4.71810532886126
MIR5047	1536.79554754652	0.726247645491146	4.78499745452581e-07	6.22878638810988e-06	68.848726954111	80.3426867568062	123.57409227964	130.14871336798	80.3048663619486	71.8877748776571	126.651868582314	115.745400778079
MIR889	39.6314699115699	0.882199954043015	0.0110175179890325	0.0409936535905542	1.76826669850955	1.83693865087998	5.17956627880124	4.40597646079414	3.81928463710153	2.77946244084609	4.61625879276123	4.43979289520825
MKNK2	2933.5595179189	0.377480758245808	0.00304452567656037	0.0143825392160248	4.86909037138372	3.9298839433291	5.99154102831113	5.57123336324362	7.93272262609282	6.57559735890615	5.90343984836719	6.38351499200927
MKRN1	3969.07398135959	0.383820061136293	0.000281746501792854	0.00188364875766108	5.95729678578095	5.91955930851697	7.88846818202598	7.77166108442963	5.40245784620962	5.55847753988808	6.75587094176596	6.50931590574918
MLYCD	497.69414108851	0.487090879662336	0.00493904778279844	0.021515013585897	1.25464650485851	1.18101955464632	1.93873879483512	1.58575007017192	1.2723810357514	1.44833749492598	1.52644115490707	1.43511386969881
MMP14	29009.126514047	0.396009910098493	6.71914996597988e-05	0.000538687037877166	48.2634612183859	42.7601904483223	62.4847593063549	58.4608933790066	66.3995737865579	53.2487869038598	52.1895843128562	54.761687800296
MMP16	1511.32354825307	0.465831508403093	0.00415820118668723	0.0187387453527704	1.25218164392707	1.34320454840481	1.60904046333196	2.04153907682083	0.763269499754672	0.889130396128041	0.936656640537277	0.9746506081134
MMP17	569.847494087244	0.634989041538128	0.00275490667139032	0.0132092697944639	1.48160569909483	0.889170843130794	2.03659428963234	1.81150920094909	2.23013988237735	1.50072827333729	2.04514209667203	2.39624360520435
MMP19	1578.12490957859	0.432779662546611	0.000502010400857835	0.003076691115381	2.5151106416532	2.63306683814896	3.62701979063304	3.43449976520236	2.73240760027034	2.54432539063095	3.27243006585169	3.38304039217135
MMP24-AS1	1695.84257070514	0.571175934921025	3.69976580832676e-06	3.95255391450391e-05	5.26002653704314	4.88780931523718	7.57491414000202	7.72166898091835	4.35261043746206	4.31764308713131	6.48553787676064	6.64807462197904
MMP3	335.436312212128	1.96051581586969	5.34585775668345e-16	2.46766983478306e-14	0.376926284707027	0.422217273613977	1.52663443544474	2.2755936730559	0.349076059736699	0.350618807835186	0.494281994730337	0.611087929032207
MN1	223.571122431101	0.746952838128401	0.00110018574117894	0.00612094288335877	0.141298858074011	0.13705874974051	0.226242333900229	0.270785977066599	0.364504218531863	0.28175587394058	0.255398162981811	0.289025342294713
MNT	481.796252898749	0.476432367170358	0.0134917777582008	0.0481340791821858	0.577005655440951	0.499965850934656	0.68169453475232	0.84888020880146	0.71900554363507	0.563898985224185	0.687266740444394	0.710710107842366
MORF4L1	12599.1747898025	0.40270969454889	0.000686198047734786	0.00406163177050896	30.6736882208238	34.7198344237528	43.0475776636773	44.5497572455774	34.9342913770754	32.8501820764565	39.6946940655916	39.2685009277576
MOSPD1	2576.20222842583	0.606685979967221	3.10115125089911e-06	3.36351809690541e-05	5.37941356129942	5.45861736820654	9.40965150166054	7.49672857123755	6.64622685990557	6.39455081082032	8.07380384887843	7.52331319094424
MPHOSPH10	1086.06758621044	0.409996960307043	0.00561657481067277	0.0237388044732341	2.40517816729434	2.47393669264663	3.09199147723118	3.48346188977982	2.64940088601041	2.64699361591626	2.60794627152751	2.62581699843857
MROH8	120.252879082888	0.692874600539923	0.00943985367174655	0.0361715112532483	0.166074395246882	0.143984277236283	0.287800790534695	0.264269731132038	0.306082523650597	0.234438317271673	0.269491688276818	0.32321609993122
MRPL10	1293.8794771594	0.336831363794032	0.00788664295601349	0.0313265333274838	3.78427044699994	3.67818602559492	4.99295888091434	4.5643336351496	4.34887405147995	4.17076781007679	4.46872430270367	4.58206704648019
MRPS25	1964.14264754065	0.435534790648246	0.000167832247145704	0.00119975218955901	2.01024856660072	1.9758608673235	2.82875320922673	2.6377634487301	1.98695435544789	2.06337951781649	2.33568520333557	2.21280942541178
MSRA	1060.92794887952	0.653846932314455	2.28475661957633e-06	2.58805136346482e-05	2.45417006820801	2.61717282137961	4.10959350062409	4.06201757364051	2.03533982216027	2.16643534435948	3.06867560150342	3.17037542136422
MSRB3	8269.45045886775	1.12995934349506	1.91923619236493e-30	2.9165920788467e-28	7.22159534977148	7.17306540983749	16.3210484317372	15.8211660754445	10.4988246422457	11.1120742166512	15.6787867790235	15.0056518761695
MST1	241.773029758307	0.591716726939883	0.00561863046648558	0.0237400740578624	0.52223308329457	0.52917387561815	0.90110972898464	0.772584722136902	0.856292110499548	0.696252412298566	0.730098988244519	0.877263660142045
MT1E	2564.36441277715	0.55163870278506	4.59578300102113e-06	4.83343429928544e-05	26.8050098938053	26.4761916988274	43.2590837296962	36.36832997742	16.2054489699866	19.0748684292591	27.6630294536301	26.2754249840453
MT1L	1202.78127465719	1.19004110598549	1.69444737756765e-18	9.96408729634893e-17	11.8518935288767	10.2350724936302	26.5533153685691	25.5352372444874	8.80798669017366	11.0035281300244	13.483051649984	13.0957962371416
MT2A	8305.8233259463	1.01896332743607	1.45657544719566e-12	4.60284647741151e-11	95.8752636426449	72.5433337987787	165.280220926474	186.457156544058	54.2478185447977	71.4304830769064	90.2644771956478	87.3897668773717
MTF1	1250.24372226795	0.583543840945448	0.00020806711640324	0.00144758629081987	0.764752215525386	0.856391054994765	1.14290045017937	1.34402515000948	0.691937311854368	0.6562560700992	0.918725446932818	1.04928561129973
MTG2	767.839551562337	0.422591999994035	0.011102964877571	0.0412514449054812	1.64828577640603	1.26039268126626	1.95425521822557	2.00406421319429	1.62845939489075	1.63883243313482	1.89939814910488	1.76940617703678
MTHFD1L	5535.67779266775	0.48882026854957	5.34645556275011e-05	0.000442332636268792	7.95747516727593	8.34858481467761	11.0284379104139	12.1604053501333	10.111777712837	9.71575105014744	11.555619877189	11.6000710416191
MTHFR	2590.37480777202	0.586570189305988	2.32159141221989e-07	3.23638225961875e-06	1.91146768131065	1.72038225797085	2.83950045985193	2.69276855744446	2.4086017364981	2.38960607742253	2.67752960154028	2.60949936464098
MTMR6	4522.52394266498	0.388979836539563	0.00115254061509181	0.00634436785474838	4.68870114709828	5.0787306899469	7.0341873076946	5.9681281075656	4.81603036080711	5.46893895110864	5.96038130838741	5.35159114237428
MTUS1	436.399146125642	1.05384908012698	1.23557746515471e-05	0.000119365608687268	0.221564268006399	0.219283332374507	0.676928441348772	0.361294348076705	0.183705870255419	0.192382920392058	0.444680044149314	0.431503618036529
MYEF2	1011.84110450768	0.811738974236401	9.70905317043732e-08	1.46230450033591e-06	0.625439493892855	0.740789391829179	1.25075152431799	1.23448836290607	0.474831594855506	0.688448067166343	0.959069291770892	0.910284194712865
MYL5	304.705939009049	0.925912799270372	3.72878781776165e-06	3.9772756494658e-05	1.93221448620364	2.06570332539131	4.00312822939525	4.09361959508054	2.73879110134058	2.38310155340583	3.62063792416362	3.86455754706935
MYLIP	456.884297281518	0.565379318414082	0.0048261223325411	0.0211308852533565	0.721306725553808	0.816211750679629	1.03928646727363	1.31771962600614	0.778436467502321	0.913960820736643	0.833731261801817	0.846889342280067
MYO15B	54.2353707652075	1.10350651294488	0.00138586015458326	0.00740274825858555	0.025102078918644	0.0103715089636591	0.0552824893768164	0.0586941445397013	0.048657230500084	0.0310222564836026	0.0525619613588772	0.0402340315767656
MYO1F	193.910530219612	1.01755192927659	8.34042547345307e-05	0.000649046343661984	0.203243827333737	0.169135376945826	0.348641892398475	0.495386015472279	0.153877179705154	0.107525021544937	0.207554650369477	0.212505584366139
MYO5B	84.3395355623774	0.880063550814951	0.00564195733721543	0.0238163149144316	0.0461171596940215	0.0249439148352878	0.0945597289134091	0.0680374845142361	0.0154404929979783	0.019053585694693	0.0694317810807247	0.0875885890258897
MYSM1	3549.34366604739	0.352153113912683	0.00179397170425065	0.00921864259118161	2.54975303743172	2.6816492398818	3.374763923106	3.37855810844057	2.3574014766218	2.5182150000123	2.94396932482271	2.89827123110385
MZF1-AS1	91.9724461396671	1.03388903991109	0.000680449467638836	0.00402936911112752	0.160813203202902	0.103778767358548	0.300076518275566	0.361208033852485	0.145467568237204	0.175843731450639	0.209910463139757	0.274260508998949
N4BP2L1	115.887235542296	1.02447790102789	0.000407882370851283	0.00258389183408131	0.140897098936805	0.143949621200363	0.283062447542818	0.405051299179386	0.315319465817778	0.180765117441308	0.329163992463619	0.293086335550902
NAA35	1959.58272286896	0.402681719251708	0.0014579965890452	0.00773613333339989	1.7955032767335	1.77242238920481	2.29427883072579	2.47519712679426	1.77501387382961	2.06179723449566	1.9490173446275	2.03591714099012
NAALADL2	2377.28205461268	0.460616728087731	0.000285419413794752	0.00190537886059922	2.54733464335951	2.74755461482395	3.58944599236813	3.80434321421629	2.72006003556791	2.69768460171767	3.81581045101119	3.81951868268436
NACC2	2995.85590762629	1.31255578416393	8.29066177104314e-25	8.69234112041538e-23	1.77461946748624	1.4265327313703	4.22952449438785	3.98268040179238	3.12756885381834	2.60569896275416	3.77952424857397	4.05087526034862
NAGLU	2289.99165521001	0.425300188482167	0.0019028761836678	0.00970452503171455	5.14326438346905	4.01894108303516	6.26901702769008	6.18724803072661	6.38219507391558	5.66565352885185	6.7509881014914	6.92942649916301
NANOS1	106.173386317806	2.23028197319899	1.34824549115893e-13	4.79868954419068e-12	0.0298075470355818	0.0492627311492697	0.312381443152663	0.302897469324718	0.0712597677450819	0.0594152928388158	0.153200149442365	0.138385755128449
NAP1L5	454.64787121518	0.462591534784659	0.00835279095986235	0.032735873002648	1.05235846349094	1.07619027405779	1.4639638903091	1.54006726667553	1.72847323206949	1.60689541887916	1.57969747054267	1.51272242433005
NAPB	1043.8501011482	0.451760437163588	0.00121830087272776	0.00663057143548501	1.41332526489533	1.53228027046105	2.07947425295713	2.02742307536199	1.49230961562851	1.47271766746104	1.71205086836649	1.6838503348257
NARS	9419.45545973323	0.322662804501401	0.00555951341589998	0.0235778292037213	18.1248658698738	19.926932885653	23.4813028791442	24.6255838159866	21.8894890641674	21.9351020004361	22.1141372782037	20.5761535020004
NATD1	471.178135779229	0.741145091774917	0.000200881039546178	0.00140772852842594	0.514957138200955	0.427255893705607	0.721969539349088	0.915729681322632	0.691855798159573	0.55653383654035	0.800080791599549	0.817200681564855
NBPF20	501.050379631613	0.661097729976433	0.000439658664434259	0.00276062369381307	0.13520428685855	0.134785769497804	0.197631412401258	0.243777636685975	0.0968634915467526	0.122116879338128	0.183248168314726	0.180061672688213
NCF2	193.491330317586	0.675897054066704	0.0039799644148489	0.0180513141216738	0.392081589525172	0.362345757426443	0.601582878411959	0.678401473048813	0.697960072630515	0.532081814841374	0.782911506527594	0.774819132004841
NCOR1	9809.056018137	0.326904359163001	0.0139532947191979	0.049454484034893	5.45717585789862	5.72350110405547	6.45169024339838	7.71894263356817	4.85563633651253	4.79367694625081	5.63428771136548	5.77613208129862
NCOR2	3322.1446453823	0.69221132042378	0.000303633588417245	0.00201108926706329	2.2144790592937	1.45428619010665	2.61497171191585	3.52156722145614	1.99749957170748	1.7457587194489	2.47578346740661	3.1132966128203
NDUFA11	4171.78592532532	0.333251426105874	0.0110508758891614	0.0410951598572746	9.16298503971899	7.24064058385339	11.1914047459911	9.73019612899592	10.5145824031677	9.57284475845553	12.146321451798	12.6251852436758
NDUFA7	650.617593460001	0.602069216430476	0.000315283270451246	0.00207807321289138	4.47458101012016	3.53541609867696	6.61805866686266	5.87922914662114	7.89419808361615	7.88702534238836	7.16032108007884	7.72870693893249
NDUFC2	880.715170054361	1.03423695456116	2.99595885591389e-11	7.83044076188894e-10	1.46345120095695	1.50848254977865	3.55270578439024	2.83471663224785	2.24436636296994	2.37224739022411	2.79959775674126	2.66049110369998
NECAP2	5496.6864647172	0.349400797690705	0.00183919378858752	0.00941168974296112	15.3722791171246	14.9137414669266	21.2971464294655	17.8155805018203	10.9485783122618	11.258033670206	16.3269745752946	15.9768620033599
NEDD9	4875.80253787644	0.785032812600526	1.01589225544543e-08	1.81026913766791e-07	3.76163121290326	4.22937933762768	6.5460278646723	7.56521470196832	3.05310652258477	3.07547289095515	5.32094374226752	5.34805620052197
NEK11	92.5669327247643	0.961643379351104	0.00162348963568473	0.00845828094092297	0.0777233990692101	0.113392936034591	0.205160723586863	0.254461876107526	0.13299381616139	0.146164493000385	0.175501736044072	0.174199527641546
NFIX	3145.14438215055	0.438915195354606	0.00046715518288864	0.00290896586029873	3.17699783951494	2.7327764341252	3.90295966812996	4.19229720155072	3.11718434622279	3.07048189665327	3.658243414128	3.81096583209048
NFKBIB	517.028486511099	0.481578270316056	0.00523305871607456	0.0224689267094947	1.25416809935982	1.12982720057804	1.61946350100435	1.77450312218805	1.40094262933241	1.25691368525025	1.47937785111364	1.62977886809334
NFYC	1140.496441158	0.560209153085219	2.10669733891848e-05	0.000193435719680057	1.82107166405854	1.67118573179912	2.66162927741755	2.57579560865912	1.76383169851879	1.88431980889557	2.53843764300198	2.64519241260306
NKIRAS2	2167.84786653595	0.520006316101389	1.63274736876773e-05	0.000153247107304535	4.62187953076722	4.48837764771113	7.17493026132076	6.13085333282989	4.42390160989489	4.03514997957031	5.79163197924621	5.6151068520301
NLGN3	23.2041973003086	0.980854109795093	0.0066229855837945	0.0271442060669153	0.00751172625106224	0.0198633265773266	0.0638907046352061	0.0615216701164622	0.0407695088180127	0.0191655693919015	0.0457571448717864	0.0431776454475876
NMNAT2	121.582689324653	0.810458427877895	0.0028068937481746	0.0134003663763013	0.0951941370960721	0.0915355379134392	0.170346186723454	0.195830775474522	0.0845445755280731	0.0695520674137586	0.187139314603916	0.183668468459416
NNMT	6498.03056891569	0.404830536816796	0.000113795325146809	0.000850571983349444	22.9470463544451	23.2374644215665	32.908882388966	29.0434140628106	29.6173601918316	25.3856650614819	31.9792205484274	32.8583639355116
NOM1	1813.16706405403	0.404017912719496	0.000785107117977301	0.00457697145286336	1.66492832636881	1.68027661296255	2.24744291046385	2.23529597144971	1.54297146210469	1.60240023669701	2.13162668699939	2.11917847048396
NORAD	25194.8406004386	0.444961560677814	4.74010391981381e-05	0.000398445652675462	25.4522183883445	26.5641306988565	34.651489056132	36.9680602992004	20.2426099757059	20.8572658308532	26.4813713125811	26.1083101522694
NOTCH1	1922.69628453365	0.74236937380545	1.21993260314172e-05	0.000118276619766966	1.19766938593057	0.79458731406561	1.71971940541234	1.71728468900518	1.92456444107279	1.44444054896884	1.54466421582052	1.76716572027543
NPAS1	34.2372091985963	1.02090065101934	0.00473438354639417	0.0207762937913631	0.0610998553048013	0.0186423354711838	0.10279434411061	0.238088215803138	0.0801709808239726	0.103427947633934	0.164620470765567	0.17144571254348
NPAT	2090.06630568151	0.388191815665392	0.00153715225411912	0.00808634159352825	1.84465904854297	1.99372392654791	2.66238300873613	2.44199688529103	1.64088458493917	1.71513333504755	2.33105139655389	2.23434514642213
NPC1	1507.84360688214	0.704592569748173	3.70973753470098e-06	3.96007893897638e-05	1.62294013249607	1.45655282967244	2.32519799218548	2.8047719844956	2.71114975254031	2.46306330964882	2.31052670568305	2.4895812125191
NPC2	3363.92424040771	0.454129581015571	2.62019007677087e-05	0.000233671886069493	20.757068569365	20.4653806104449	30.0363516869307	27.216808535587	20.5271674089652	21.0733127331271	28.9589398964976	26.6851715625563
NPTN	6434.22231924628	0.635702483560859	1.44083677045903e-10	3.43691663500148e-09	13.5765268948523	13.1549278142388	21.8247214089378	20.294032806019	22.7145395170105	22.1203687263637	22.6534576316225	20.9509874461946
NR4A3	103.268395929329	1.09358722807969	0.000148711942390383	0.00107582056630568	0.0505939540239506	0.0679382317473726	0.15993104350009	0.151071936820957	0.0563902684008262	0.0620219964168876	0.0638048498827817	0.170924122037881
NR5A2	109.112164149436	1.56810179428256	1.0477901004294e-07	1.57284806973448e-06	0.0572903906420728	0.0530227267822513	0.186211052651598	0.250246997551874	0.0755141592584079	0.0767402236632189	0.0843369130320254	0.0759939273207082
NRAS	7434.57501382819	0.743935338252961	1.52564112463985e-12	4.79867353738465e-11	7.9036042734459	8.29792437451079	14.4806387548143	13.1513249120755	10.5729845906124	10.3292021894589	13.032242352188	12.0261584321552
NRBF2	1235.30120811059	0.712166805124217	1.4388975431108e-07	2.09484276324796e-06	3.1073230989665	3.25129620185761	5.7351533987297	4.9771219307868	4.96910366757276	4.77593563383862	5.82308911782391	5.07562281277854
NSG1	54.2652848988267	1.4182479921712	8.72192811136474e-05	0.000674465853094386	0.024891851244165	0.028209321600373	0.0712923591712723	0.375372973628413	0.07444244138876	0.0680459675933066	0.0379067342658138	0.042452060254886
NT5C2	5324.31507593203	0.334209247771792	0.00768777939807497	0.0306807956208215	8.34329815331799	9.01528889510052	10.4798685960576	11.6426580956049	9.76366396061957	9.81699212977954	11.0653110055946	10.6326808077885
NTF3	748.701121239139	0.372419114691202	0.0122594962895262	0.0446685580053454	3.09984620232633	2.97942196940575	3.94442942863804	4.03634121297376	2.59729301046655	2.80870081826995	3.60029083667124	3.47233407413223
NTM	2934.89488166899	0.705581831956202	2.41311817233528e-05	0.000218310523617623	3.39040014297944	3.46284982146934	4.83222661314357	6.66672690298152	2.83209497325077	2.83553969460042	3.49108018229743	3.51526389791839
NUAK1	2644.99843816429	1.22262308290706	1.95582037207561e-20	1.35653695037552e-18	1.45845801803995	1.52117694905374	3.38205285082403	3.80546863088273	1.31002156504734	1.33944212512055	2.50282811378899	2.48276817566227
NUDT14	257.032011626923	1.03624462849253	1.44711963217436e-05	0.000138320092050588	0.919705649334519	0.593520412003751	1.91571961270074	1.52332071242698	1.49976035634312	1.215180519445	1.63401040478957	1.66050252006816
NUP153	5756.99229271976	0.324829887363719	0.00222179108068687	0.0110395754468368	5.37790185788114	5.67411323524079	7.21409456843569	6.78676676095668	4.70861587292106	4.75125947085839	6.14107235737127	6.32587481958274
NUP50	3530.06078752508	0.516674391525598	9.19867864768979e-07	1.12184065563575e-05	3.51527213331613	3.36349110361546	5.1440586984618	4.82590634662853	4.55807950628482	4.23629504224781	4.38232345181588	4.38861131271452
NUPR1	2280.40815704357	0.75429026202626	5.07542853270519e-06	5.28446273324385e-05	12.2209553788047	11.7026102588109	17.6576008406628	23.8785187852564	22.7683827404538	19.6589724756297	20.6517895246974	20.5137426900353
OBSCN	1895.75571933522	0.537716188114311	0.00427985540884171	0.0191862924774889	0.382351186882305	0.314514523952461	0.419267206583604	0.617226417332736	0.692901533510977	0.527230986081179	0.467883042737447	0.509488651921512
ODC1	2780.80732739983	0.716093763936277	3.1336527679548e-09	6.02026330775407e-08	5.0802315715557	5.30766908148312	8.46626998884533	8.91877950407755	5.83330895127054	7.15468367500949	6.29853735049707	6.93785826351979
OLR1	1274.99252998212	1.56845913923057	1.263776850669e-18	7.52977176444856e-17	1.60220304194954	1.56255274313544	4.27545244407284	5.82486107634635	2.6598061195664	2.08315589828464	5.06405516065006	4.49516212147885
ORAOV1	932.882127658187	0.507622622634263	0.000310435726207392	0.0020521227746603	2.00983018298851	1.94990935360615	2.82829871622815	2.89735726375741	1.93182876091924	2.0060850627321	2.63074535887103	2.29410239242589
ORMDL3	3872.30277289169	0.555529906524001	1.4206600699809e-07	2.07723539962072e-06	5.39163462090187	5.37339345887147	8.12664357354509	7.90920665761035	5.84725949248557	5.19386867342888	7.82399765005756	7.82024841329724
OSBPL10	946.58278284044	0.928988424162995	9.80300592383214e-09	1.75377850687605e-07	0.987623509697873	0.99265163312663	1.77630013317942	2.13084132640072	0.846552655690875	0.76818938924343	1.4030208972263	1.32418922312422
OSBPL8	12089.107563739	0.329585525519833	0.00172769943781113	0.00893922528553771	8.51385430551337	9.08058204446358	11.7410896418394	10.6329589158993	9.16120836441303	9.11995273174676	10.946122196479	9.81792435447946
OSR2	94.3583611942892	0.798725023714126	0.00656210531392718	0.0269436777082165	0.187734268488448	0.198570978766125	0.350718410725143	0.425676182994881	0.229256574750396	0.215545044289917	0.293039789701976	0.245910891735695
OTUD3	1270.00100513133	0.696917359874815	1.40417558500314e-07	2.05758123371261e-06	0.96043197483742	0.966050174185815	1.5690129542948	1.61929677791451	0.832558528447784	0.899871882338245	1.30047831516853	1.28719040632391
OTUD7B	2976.32758442167	0.355979099485295	0.00220882951846282	0.0109913242226673	2.55401424782609	2.74647904615273	3.475615916633	3.39473252254931	2.21180675872291	2.23082260806828	2.92770832398271	2.85757107974653
OTULIN	2299.4635218504	0.407042337456655	0.000371729940394856	0.00238616395056499	1.58815440858071	1.61421020285327	2.18562554294648	2.11516216933207	1.56038329165763	1.6477277746378	1.93671534725939	1.92806714166748
P4HA3	118.155727104795	0.724364299819766	0.00963396929756592	0.036863235132486	0.25173050433638	0.22379722343158	0.37969968255211	0.491067603571386	0.386993240406279	0.377887465008275	0.423006460348717	0.348305500219912
PABPN1	252.750336779958	0.69264786345753	0.000915084311609464	0.00522877706570257	0.411732358278726	0.380636385060867	0.674208175985518	0.67227792654805	0.481348946600928	0.446258266194208	0.519242305106686	0.505615624593896
PADI1	37.3447721566943	1.84557319299674	2.83910001440307e-07	3.87866946412136e-06	0.0155623754148599	0.00342931099604222	0.115819548076363	0.120376210670356	0.018099427305854	0.0148898090772148	0.128371073243376	0.115256797967234
PAIP2	2491.73943402279	0.497873968860332	2.62668629688563e-05	0.000234031173684968	7.86732944570387	8.27706250928636	11.5138133788101	11.6212003816528	9.69852059428177	8.47971345939776	10.8484855823875	10.2528245263051
PALLD	31266.7079123715	0.935507350542	2.15287121579203e-18	1.24968168212821e-16	19.1688235007461	20.6408861154356	38.473759309445	39.1908134549554	19.0969561017703	19.3233806883461	26.758584034991	26.7792212336485
PALM2	285.991200177232	0.736610637779465	0.00139338946252585	0.00743709253380509	0.131537729926793	0.150448731407555	0.214054057347404	0.286901352115578	0.0987500478385258	0.0988845026240585	0.131157436535805	0.128091005782904
PANK3	3537.91536598938	0.68013369755571	1.07848318622433e-10	2.6234685420295e-09	5.28511042458484	5.15316093550268	8.69568348906564	8.29017662550209	7.22712869532337	6.79864198377865	7.81966571925553	7.20201576687374
PAPLN	286.112897763145	0.564547852390584	0.00822372781710879	0.0323557477245658	0.285674396334114	0.220516808104407	0.430254159830018	0.353886358357869	0.400552527713532	0.338796124711396	0.362100247180632	0.3936873243528
PAQR6	190.018034104822	0.745160325406036	0.00122482452231439	0.0066609375409337	0.39496552298554	0.349053134171948	0.678187469893781	0.657049221557341	0.51254310178026	0.397785385555872	0.66795501576855	0.705899147112356
PCBD2	386.658561340262	0.523762253020706	0.00575276703479782	0.0241746575811386	0.835003026771253	0.882092912061452	1.20449964347228	1.34025656870619	0.76128718165943	0.786872352251817	0.948900336895122	0.954544552116556
PCBP1	4321.21856776851	0.45005172105147	0.000873170153811438	0.00502604477130241	14.100447350519	13.0606338077567	17.105262768194	20.4467520190865	14.2218967842768	13.0382684088485	15.6553822301079	14.3284921521896
PCDH1	20.3894046238712	0.94675081925057	0.00830307738668711	0.0326166487525249	0.00533111827435139	0.0105728436879759	0.0275300584245773	0.0512088789163499	0.0399569883946371	0.0782110535447342	0.0378864813356628	0.0365364095511181
PCDHGA12	232.342691742446	0.620595110144315	0.0117724839768526	0.0432318343162996	0.265363344147228	0.216541074743441	0.324953005038905	0.457182894285928	0.298979624934445	0.287615446028347	0.339389654733056	0.375371001379739
PCDHGA8	476.855289295276	0.474222234093188	0.0096933344965405	0.0370166142479607	0.436507839089774	0.47240951817961	0.603100044081896	0.691942438988468	0.545881083049099	0.461428240503689	0.588347706796291	0.572009914808147
PCDHGA9	383.964580817031	0.593834085796778	0.00366553244782591	0.0168283524632876	0.440334989771458	0.401316074347037	0.578540243737568	0.734633089445813	0.492232304178549	0.470388887803859	0.533849694007199	0.584090714593289
PCDHGB6	317.640571599066	0.699017262651554	0.000994219605114748	0.0056075146618753	0.324437883698172	0.338052232732807	0.503209561481967	0.625677367311964	0.33984623783392	0.33919684039648	0.449900509047237	0.528683348632679
PCED1B	116.143844184196	0.92219145081788	0.00124182950828022	0.00673446034462309	0.214029952169906	0.195256670682633	0.378388068015195	0.516787763715104	0.172586006767351	0.15153728973557	0.257490268175522	0.278226015190681
PCMTD2	505.018004990248	0.472417589471265	0.0113794748886586	0.0421202511957052	0.370304387029267	0.473211369846257	0.611378273633381	0.601112972691197	0.564620316035913	0.564805833155728	0.575718196747318	0.399740054677853
PCNX3	2579.75430129147	0.492080977904523	0.00150331885989268	0.00793923763375576	2.40409942394071	1.84044843314428	2.79050075503765	3.27056620556148	2.64638717831359	2.30892424829506	2.54448768192607	2.92590412361098
PCSK6	192.93838123555	3.06531850224768	9.71605417329494e-31	1.52801898481179e-28	0.0220509975031183	0.0333198027511272	0.393289105221193	0.35259907294495	0.0439643231858691	0.0135630060426311	0.148713730379798	0.144160540106805
PCSK7	3265.96201635881	0.45431652806512	0.000124644958710592	0.000922222684114202	4.90620613347636	4.27452403605386	6.26175532467264	6.45080557392512	4.3395538263937	4.41130275844029	5.40855442304501	5.71176536899581
PCTP	927.047232857656	0.619339831118412	1.02989898454017e-05	0.000101157471066855	1.40838876995096	1.41827903855799	2.35483019270274	2.09987353269802	1.79299857307801	1.5673505502644	1.62448525910286	1.80089775681887
PDCD4	3892.12675525151	0.437082644465554	0.000887812975996953	0.00509879851395278	5.51249595030799	6.10753426063759	7.54144974694783	8.41799789320232	9.23651864591711	7.99529262779795	9.38707424906458	9.57953150645393
PDE11A	426.55796945559	2.39805398487447	1.21088138295928e-32	2.24344804171564e-30	0.0815368855580062	0.0781581660166411	0.45232880137174	0.530525196901094	0.0972001488141106	0.0984914989364079	0.338360610014189	0.337311996688967
PDGFA	947.348928558461	0.956773544802457	2.87273923342993e-11	7.54442682177473e-10	1.56051853455671	1.38881414436207	3.16490095472997	2.75822411409427	1.51312372909969	1.26180301852137	2.63628613783848	2.43540864011978
PDGFB	190.908239834142	2.35493752448759	2.0304730921979e-21	1.56926563268438e-19	0.0931563146591795	0.0769794052230095	0.570671669652617	0.560444498122754	0.0802541457418398	0.131219660380464	0.226587953472055	0.272881461660881
PDPR	3683.0349858524	0.350473205030734	0.0033570670285572	0.0155921468273476	2.31609150001278	2.2004055027016	2.77369567668169	3.03545170531443	2.17214242271165	2.18231195377343	2.56935586255479	2.71066064957845
PDRG1	438.918031827634	0.594420249311162	0.000677223380496003	0.00401553977255959	1.64968924692393	1.62384744275301	2.73518991629761	2.38962728519945	1.72423080316904	1.92605771534992	2.32963327246367	2.30394067953186
PEAR1	4317.71993077154	0.498432211102758	2.2871307535671e-06	2.5885726729703e-05	5.01979674355819	4.57103476189718	7.0019589573311	6.70467592594775	5.7300338546745	5.84268743864555	7.55699715714561	7.7384520404387
PEX16	683.400289635558	0.473963135923832	0.0106872581317311	0.0400069654668318	2.3010239008757	1.58338370178529	2.94522227886832	2.59047400090087	2.23012306458718	2.41173026211233	2.57633249993891	2.74701319041365
PGPEP1	3723.13429571353	1.25238616595427	1.4946046009607e-28	2.02145272279935e-26	1.92758293514474	2.00009146141092	4.76324859009493	4.85046060881284	1.98237082205518	1.9329194510991	3.2154999708239	3.33824950044473
PHF10	1114.31955125955	0.638880864903635	2.96254428930024e-06	3.23393151838465e-05	3.31012097157164	3.43416594110745	5.31014762697371	5.41841555397072	3.65321860317726	3.22983662725102	5.25428250690819	5.01972140813049
PHF13	1636.00034064141	0.360612690375337	0.00545445495586507	0.0232351191427008	2.50675379108677	2.5684151750866	3.60004162546023	3.03413672442049	2.64558775480634	2.51287639747339	3.01626496266574	2.84186918217577
PI4K2A	2328.05456289567	0.735155583935806	2.15681767948555e-10	5.04687873962666e-09	2.77155548566927	2.64197780233768	4.87769637827572	4.31778464320318	3.7139632900697	3.4954191319254	5.00094702549134	4.83651344227029
PIDD1	698.808318465874	1.15081754643552	1.57711724935021e-10	3.7553716192714e-09	1.06813184547601	0.756554686438194	2.27627703329676	2.01043055193302	1.64349178059808	1.34252567625107	1.98780098849141	2.35847288180824
PIGG	2764.95699595966	0.480138788584712	2.55278457192189e-05	0.000228803256032098	2.37617303143534	2.2731731931662	3.23475871608453	3.3260647711245	2.30744001291312	2.25725225739632	2.70747156967137	2.7377318277987
PIK3R1	2391.71979980212	0.466168551279304	0.000648429539733702	0.00386344031933846	1.68016166525358	1.72720755514681	2.21123736737336	2.56209920434016	2.11867592542475	1.75584265734987	2.40988774432835	2.21745257306171
PIK3R3	552.373108612237	0.792357945470759	3.76172536466592e-05	0.000322008452893079	0.382957117968862	0.398258392134877	0.616592583614172	0.796165433012803	0.546906680320574	0.482266505061063	0.64312146067993	0.725830196680967
PITPNB	3373.8554202997	0.390450117628383	0.00582731269740223	0.0243931922724745	5.97895281508	6.52888198476081	7.59149981214443	9.02627246672198	6.5227310822199	6.94459337578227	7.05669608988472	7.46193447883787
PITPNM2	1284.13400988621	0.451565867592995	0.0125765431624707	0.0455386676056851	1.11410591944601	0.912322217670613	1.19607029723894	1.62346307538619	1.26842480927045	1.01093995118939	0.900852716734371	1.05640792258026
PKD1	7209.8157624697	0.469841077717298	0.0108724914903779	0.0405992400351631	3.50552449643441	2.03795089358292	3.97280817879044	3.8920402692231	5.28990961322999	3.65519132892449	4.08414936573691	4.76090604130696
PKP2	33.9584836948157	1.26046601123085	0.00043560158485684	0.00274151299915717	0.0202303868734961	0.0133738493597623	0.104470338851544	0.0640935212549973	0.0400854904119863	0.0193560809371634	0.0633275345950715	0.0641057881684317
PLA2G4C	138.366674251507	1.79503917829227	5.09353515400906e-11	1.280484441598e-09	0.124385837103682	0.131051914587163	0.527798767846335	0.629632028505823	0.223023363484218	0.189672501722005	0.429158911757239	0.471779596519141
PLAGL1	2868.87722163968	0.371865346409974	0.00277351111839262	0.0132784912836319	2.73321650307775	2.97214074850701	3.6445370498495	3.83139802515883	3.72859692186501	3.43492490660864	4.21156421003767	4.15439462565138
PLAT	22506.9089254468	1.59592676753533	1.00564065096138e-44	3.67602427141965e-42	23.2925042617947	21.2264635515976	66.0140001463698	72.798069163345	19.6426867847626	19.8198636936016	36.3957944001097	35.0655291750424
PLCE1-AS1	53.631465879881	1.83446965950934	2.22038113914542e-07	3.10554859430628e-06	0.0283468078697756	0.0655880083895035	0.316447302166029	0.582556509690846	0.252754960140351	0.26443687562521	0.55578979931194	0.686221205688947
PLD3	9808.24027861071	0.359406488874045	0.00775232076944882	0.0308745990597159	25.7178030813154	19.1606219882914	29.6660113451092	28.570293230197	31.3546492398044	27.0169339414274	30.5636648146481	33.0281143561874
PLEKHA5	2506.45910781666	0.363699194390217	0.00693825091666003	0.0282140239470315	1.40788554085344	1.56749414307245	1.84764170792749	2.03170800964708	2.26071791052363	1.90199699693465	1.7927527510441	1.90481160744352
PLEKHB2	7801.68524717734	0.575679128897561	1.23461452879518e-07	1.82893335180228e-06	9.51174856126932	8.72620543614686	14.9164508024328	12.6963624520007	7.39396232156084	8.28944893799705	13.0001740938735	12.0384256801187
PLEKHH2	3340.79499354555	0.612613713547321	4.9014854195013e-05	0.000409972729120316	2.32448716129722	2.58292631945871	3.42328398336443	4.24845526812359	2.82915136737309	2.38190731299202	3.41531125343794	3.64578789984285
PLEKHJ1	1570.5067328062	0.580457642459952	8.05936619546994e-05	0.000630803980287795	4.65922768596186	3.89685778761752	7.33738675535628	5.78346975385176	4.53798877657709	4.23747873469382	5.97124538795197	6.29490008713291
PLEKHM3	1267.65336849675	0.549740721531856	9.85548030391305e-05	0.000747951838888855	0.661338802957546	0.698841094037097	0.970774765458883	1.05766797022551	0.683954848182735	0.563640839980054	0.821968567839413	0.85970051374765
PLK2	9814.53161720422	0.379784784910373	0.00276496376212827	0.013246948240448	18.0153852433774	21.0625393408879	25.1035176709593	26.4565541776839	18.6597392885549	19.053331279395	15.679739195641	18.8227336003268
PLK3	1571.73938987594	0.925923333051698	6.9622227027604e-13	2.29668444036182e-11	2.92908689600642	2.68130712711274	5.33490947605626	5.57342098020855	2.89382886369462	2.92102235865137	4.24455012895684	4.85535356493981
PLPP5	1218.48680755617	0.472191674561206	0.00358321351100203	0.0165064586976507	2.30731137397628	2.72143653945175	3.29080591935689	3.83729717022048	2.99439376910688	2.88042080329372	3.46160790297819	3.14377227303253
PLSCR4	520.894191618391	0.838225787673486	8.57522664862946e-07	1.05436309475194e-05	0.638116936490209	0.663413755104262	1.31710813575906	1.12250649268989	1.25805337290529	1.19759601182932	1.62583082891405	1.58798369900754
PLXDC2	49.600370532833	0.876687734463346	0.0109543229936306	0.040825907547218	0.0179008138419263	0.0123717225083916	0.0296600060543675	0.0459079224637627	0.0138793926681313	0.015570169213636	0.0278799369517148	0.0178086560089607
PLXNA1	12066.4607972979	0.339805615945113	0.0127763790221104	0.046080140339745	8.82684452776211	6.51187991649465	9.97262978478696	9.655372075876	9.70006524553478	8.68546356072754	9.78234043437074	10.6121378647413
PLXNA2	847.71744643621	1.79158735231389	1.82638854152616e-21	1.42785578174227e-19	0.211891336008837	0.191956754382194	0.653985184050065	0.881854876991611	0.21161621867497	0.253625987329865	0.541120157832904	0.567917855728666
PLXNA3	3364.29114324546	0.444646998822836	0.00346770525909609	0.0160344320100084	3.15066037043591	2.34367224562032	3.56071315840866	4.01963074772221	3.28961648307951	2.7444363745164	3.20017081519804	3.4833645153806
PLXNA4	532.245767535795	1.90981693541656	4.7571580253011e-18	2.6920737360752e-16	0.105529875962642	0.0637714557119254	0.423617035017683	0.317753937175791	0.0401583163743232	0.0607053741777453	0.0961283776474051	0.100477955747322
PLXNB2	17519.2996821576	0.510035589800297	0.000779843908918137	0.00455610750242669	17.2013531236825	12.4418225960381	19.9543983240329	22.9657618405391	24.1510682034374	18.9083374240992	20.909870073966	22.831686699814
PMEPA1	362.161762487928	0.83764479704652	0.000245912180738402	0.00167301923766946	0.298419902315854	0.291733233100685	0.454898045004258	0.672054553897996	0.272046570963493	0.297636047049962	0.363560711519803	0.356260275102586
PMS2P3	305.307619250298	0.567574233729316	0.00395437632903166	0.0179653812059635	1.01043811343403	1.08546374824726	1.67200034263057	1.57082639037008	1.13393066148763	0.998571174400083	1.29579194182771	1.38440414011459
PMVK	440.444160530044	0.57249918463848	0.00126416568224152	0.00683121462980887	1.57767088238329	1.58731557295968	2.35207704634668	2.49357596815083	2.28554011837218	2.15830295186487	2.2971916588342	2.35432296161129
PNMA1	2069.69537827981	0.332908154668175	0.0036131416373141	0.0166273360478643	4.56054341852232	4.47738395134001	5.94503680036755	5.5724523686842	4.69517421029868	4.22618752418043	4.86958829297566	4.65474785216327
PNN	3272.55065337962	0.414684955392128	0.00318109315147726	0.0149130970099584	4.76213794593652	5.34141340171677	6.32678259498042	7.34183851094249	4.50544904713756	4.88461921032002	5.63393305680139	5.1606395634358
PNPLA7	55.7110094374161	1.32005279456442	9.52329829341677e-05	0.000726467058197754	0.0267895482883298	0.034057619273478	0.10140910434332	0.138771285974907	0.0591182335877724	0.043376845017245	0.0784551073566659	0.0888387634802957
PNRC1	4438.38257739309	0.537036406590695	4.1643666910319e-06	4.41749486244757e-05	10.6049222368284	11.4607653874768	16.0033677453661	16.5000625720175	15.7160117118337	12.8320753911526	14.7356964704114	15.7269812619222
PNRC2	3559.29841939923	0.66557861299184	1.77269945902181e-08	3.05423696602166e-07	7.26655271696067	7.51713564918837	12.9991712696613	10.9596144924906	8.87101533962426	8.46323836045964	11.3837996774024	10.9986046689161
PODN	1468.92531393903	0.692747151917476	6.62333695841859e-05	0.000532267571970359	2.32150152598127	1.9111258132509	3.03100545203924	3.9984162099425	3.61127215129465	2.66261262465142	3.74209784599768	4.17946213638187
POLD4	1511.20143869648	0.342351732346254	0.00608886944650844	0.0253156960541121	5.09675605498565	4.77105912456217	6.70609956263683	5.97776067213396	5.79797899869779	4.92530631933725	5.96583691377942	6.09890846919163
PPCDC	249.154854348024	0.575541702437095	0.00578243920864436	0.0242729640896694	0.535569747366198	0.520185558575333	0.833463926943904	0.811039453995535	0.543024335432399	0.618850261261158	0.727762792060004	0.737740386510384
PPIB	20948.145717846	0.379280216254345	9.30794367974314e-05	0.000712853557579422	118.678929745096	112.573084700744	151.140438207183	152.295546730435	140.566479040477	125.892109414679	162.882629603589	159.921692113617
PPIC	1475.83168649212	0.597423670703399	1.92088588922734e-06	2.21672198394196e-05	6.31299006591093	6.01990574644076	10.0714719996158	8.96260049158588	7.07301343361658	5.69257920688694	8.98064950110755	9.69647569341988
PPM1D	1166.44846626219	0.57932547203266	4.41444545050086e-05	0.000373158591987651	1.22819947784272	1.30765687183173	1.86733285437544	1.99901266570912	1.33611308579621	1.06720064921165	1.78925929892652	1.82865856092012
PPM1L	81.6854565288131	1.23000572744308	0.000213905803153859	0.00148591473428657	0.024216532752406	0.0182959998637766	0.0480778363286107	0.0941830996714409	0.0295055893714647	0.0289624446447891	0.0526833152217702	0.0418739471964132
PPME1	4076.55287740699	1.56766591174483	6.36370175533418e-35	1.30407676122568e-32	4.88581670538918	4.63295870098612	13.6840819645968	15.6026845671891	4.08307458816422	4.47021253604711	10.5621704697956	9.80059614411891
PPP1R12C	2616.17101568932	0.357792114336124	0.0133337715604803	0.0476709649366894	5.73108399945504	4.36266593370652	6.33904378013334	6.72920756517294	5.73518591218562	4.64302078358098	5.72702173794187	6.74056310374994
PPP1R3G	252.707828543921	0.676942937383968	0.00748451913368807	0.0300291074705225	0.798935838394228	0.596552945299131	1.52423258043218	0.920567472113029	1.24336601510036	0.753409186467573	1.71996191842908	1.96704327428342
PPP4R3B	3450.4815993065	0.48017617470583	3.53030026415591e-05	0.000303736075526137	3.28570280900114	3.3998653263086	4.61864924203591	4.82849692237428	5.69927198284707	5.62019900776105	4.59594075230014	4.60733224974441
PPP6R1	3520.82580440315	0.36840568423469	0.0076109387161521	0.0304289733929474	6.2771071583526	4.75178796159596	7.25291186392563	7.14527596202771	6.3644781279472	5.81945691357075	6.49043722768091	7.03630740106066
PRICKLE2	3949.21354979678	0.406223282777407	0.00633165265081486	0.0261402936820119	2.55267058304167	2.74726092805516	3.15993791178713	3.96506115238879	2.88747511552373	2.46529428568008	3.09856155638643	3.15224429879391
PRKAB1	989.760176826445	0.442940971073949	0.00132729853114656	0.00712369548958622	2.34387133393203	2.20333874223721	3.11306099322315	3.15655665055666	2.42953799905584	2.53681375411558	2.86056797466191	2.80312668919174
PRKCE	1784.68947514653	0.873703994199402	1.1118466886257e-09	2.30639976436543e-08	1.47682760768506	1.46384830318602	2.54176163722639	2.99107360727305	1.70987854572578	1.65859210760035	2.90552861794232	2.86411865226124
PRKX	1063.53166792751	0.341769983933556	0.0100806877770866	0.0382229610835708	1.00207177221702	1.00505445146654	1.32718581923612	1.2536686302131	1.06688415613769	1.05448433567474	1.18509457166373	1.24546123558254
PRMT6	645.193987794961	0.44727906105773	0.00450465133724467	0.0199953654230606	1.43726439419363	1.23618062267758	1.94066638671291	1.77699627059827	1.49945732271865	1.39674868412378	1.89080358734423	1.91896367409998
PRNCR1	38.8368403345902	1.6954445138216	1.71364110603116e-06	1.99457796549668e-05	0.00470589987588163	0.00414795139184858	0.0414553488959934	0.0302148020417542	0.00608119764935809	0.01725967087147	0.0650949216325836	0.0832297375152125
PRORSD1P	34.2813558122554	1.03636127416128	0.00344850725355783	0.0159674976392912	0.0556139881290906	0.0398289066936989	0.17316008852802	0.150421935108111	0.086240590612318	0.101986777903781	0.0952786809583499	0.0829915102706991
PROSER1	735.800141301445	0.380931341943704	0.012406650812337	0.0450590634363204	0.866735594931765	0.74397969928753	1.07131881618799	1.05516330129574	0.818700968907682	0.685215916616266	0.858385389109887	1.02294946775749
PRPF19	1877.72610814212	0.575924852997957	0.000226753641895432	0.00155914743601206	4.53703985378261	3.81682167307747	5.68119227036073	6.99765990181645	4.15588891428987	3.85545835231076	5.00337187653098	5.07365011987006
PRR5	73.2085037259153	1.21028349020488	0.000113654946198839	0.00085021191777616	0.0866542495961233	0.0657718464868136	0.222280232571549	0.243383263458638	0.358332566590519	0.208808539474809	0.261480349892856	0.329932357075472
PSAT1	7380.7036234367	0.578483798909775	0.000222037859438272	0.00153139319168926	15.4978632983352	18.3649081565925	22.7768774062151	28.9858872702788	27.6915933820126	25.6148397741457	25.6755522850632	24.3796867172988
PSEN1	4855.8041925881	0.596390315796767	1.29636518159855e-08	2.27705702352212e-07	4.10100577249803	4.15598115144569	6.6473085086102	6.03354863209713	5.670892353929	5.17630480041572	5.85101958574837	5.82236396278941
PSEN2	823.785978344385	1.12874444606727	1.72799931178762e-12	5.34809855650515e-11	1.36340991306813	1.48401941051292	3.64432900956677	2.93583380995838	1.97620769985393	1.73654612180005	2.72759525328377	2.85965181577419
PSG9	975.856181298661	0.386395509263995	0.00560382944972681	0.0237071608719284	3.06223723084252	3.25264826629956	4.29566634754527	4.10519865742359	1.69847291155983	1.56919476233075	3.8118955957898	3.55992242293731
PSKH1	1232.40830741438	0.416408360127256	0.00587435758022958	0.0245597175494915	2.08390161479663	1.86461913980839	2.45806618532226	2.874552530311	2.77144931426118	2.4244225050139	2.6474805571551	2.51138171503004
PSMD5-AS1	664.032108738523	0.659490067699978	1.80772024719741e-05	0.000167417868347946	0.880109421801985	0.870125363387176	1.41015972452695	1.42728942798567	1.47885696301914	1.29201698689237	1.39229185021274	1.39395566175426
PSMG3-AS1	131.625308315101	0.754540741015637	0.00813176906119203	0.0320741255621529	0.10205224924942	0.0946678215072892	0.147000264417608	0.224182564286186	0.146766324594859	0.166935998161356	0.125331451607053	0.183403358083464
PTCH1	1228.08938006646	0.561883576684311	0.000965367907016516	0.0054698789033927	0.694107768387687	0.72860340289831	0.933653418496809	1.21620166462583	0.977486398655038	0.865677185323502	0.973444189762386	1.06999728342921
PTEN	10220.2125236668	0.598842684015118	8.05268410890347e-10	1.71515830823495e-08	5.98166591561847	5.96501402135303	9.28491276268516	9.04017827794374	7.32876402866664	6.46548271857565	7.63617646582918	7.03753208925318
PTK2B	228.767211979544	0.959380770114096	1.56433695923559e-05	0.000147756971118427	0.213890086602827	0.189445702127458	0.406867537266454	0.439046793395843	0.30269759294662	0.319884022848676	0.458543569815122	0.453123346904198
PTOV1-AS2	156.502722329063	0.645430974529255	0.00852508394712172	0.0332953394123076	0.679705474806608	0.706958224073289	1.23883056622857	1.10787088877545	0.625384621986093	0.572290690935968	0.966088068572874	0.991769067383674
PTP4A1	5485.85059460377	0.388403508072834	0.00565083844509576	0.0238389238833188	5.81547936999362	6.32019253714404	7.28835011133901	8.80714970069071	4.60480594190921	4.86065757818949	5.88966452994204	5.36290543824552
PTPA	5337.23901342139	0.455115239957117	3.60012711115311e-05	0.000309546847923368	9.96821011139025	9.36610842169483	14.5266480811149	12.3632399071712	8.9298687450876	9.06541618288569	11.4239345500547	10.9649648129547
PTPMT1	1103.27076510042	0.341106171130545	0.00943272773841163	0.0361614633395741	2.38527008118812	2.24369805884193	3.07967853229097	2.86322750848586	2.88848143848619	2.66196818596805	3.04458272659439	3.00941036941832
PTPN1	3999.64980867773	0.384569630323732	0.000219279877397448	0.00151778932538408	6.38966653574881	6.31294708038307	8.66925422385621	8.10381076342285	8.93324622640327	8.13974766490634	8.08390677721224	8.26203723472236
PTPN12	3314.6984687167	0.433125647391563	0.000318878156656722	0.00209665875973854	5.40819607930777	5.7259789214253	7.39686680834327	7.82888057220541	5.96252520758673	5.74200851361087	6.29330463476546	6.33277925710726
PTPN21	5351.28962654842	0.492604216580183	2.44221737932429e-05	0.000220500601170634	4.53709474208769	4.76969927204942	6.40827218661233	6.85990299725482	4.70662995572164	4.35176571757278	6.04384518048241	6.1844261561171
PTPRCAP	43.2346196093119	0.991912332156728	0.00405719420335306	0.0183472746201032	0.176018987786743	0.145452694617138	0.421065807008759	0.507233261504396	0.358250259404147	0.13683466405009	0.410454285804363	0.437781995866263
PTPRG	10807.4415484302	0.484749724846122	9.10302422928784e-05	0.000700332211041627	8.7473268780533	8.87540943508365	11.590586733114	13.3889309697113	10.4631270079384	9.16486039934142	10.5849733195003	10.6912184679415
PTPRH	1043.82039120124	0.511219213716429	0.00465091754740097	0.0204831194492342	1.44793878080239	1.37198587464991	2.52095081767113	1.65667914164944	1.30386017514711	1.33675333231607	2.42937278541317	2.39406827913376
PTPRQ	445.016139449431	0.469623801371516	0.00737535008443007	0.0296526783269669	0.322871055369703	0.276412414939236	0.437402720824904	0.412392632847064	0.595631822755739	0.746846253267806	0.824187146276604	0.818815880878996
PTS	1015.17200841671	0.354345809387151	0.0138417695455522	0.0491537163538067	6.18555269627754	6.23609740458609	7.71056633195422	8.36397164490703	7.83589793194822	7.96252202179077	7.57318919407557	7.64519385439874
PUDP	1967.15935210822	0.330441936069489	0.00662220372878145	0.0271442060669153	4.6526298072553	4.62305667634719	6.35805107695849	5.48074005125896	3.36397042381782	3.75709678421222	5.4707634470336	5.17092039721658
PUM2	6695.04235315373	0.35129558297122	0.000846119744086204	0.00489128784228947	5.79967044832707	6.01721310154858	7.6197600483038	7.61083686961274	5.47619781136045	5.41816409957821	6.66383641407812	6.43434465345416
PURA	2531.15652888462	0.431304003783587	0.000148745616191617	0.00107582056630568	2.72917540309655	2.57546470376537	3.83885371286799	3.41491581055756	2.72399609873307	2.7699207504971	3.15011631075574	2.84513091263882
PURB	4298.94589567857	0.529202056861136	4.26015756515565e-07	5.62132986036392e-06	2.56666893542358	2.47369556582265	3.86900695939948	3.50703414598256	3.10549034649992	3.02689611760496	2.82246429019082	2.77797864208168
PWAR5	691.985417370911	0.425997509364432	0.00681302096222799	0.0277715818306611	1.11820719475863	1.15381115432062	1.49887847435561	1.60802607819566	1.42206634530041	1.50292824000119	1.34022164093377	1.17523418262758
PYGB	10470.9131501219	0.590131885566268	3.05331087523832e-08	5.042250254896e-07	13.9997411380908	12.3622361278792	19.9227526117699	20.2455019494352	11.3903149039797	12.6551794992241	18.0845141613636	18.8665900861071
QRICH2	412.676082525247	1.2026001328574	3.60645064715619e-11	9.27324049482652e-10	0.301701044727243	0.274391697288143	0.696514721799012	0.712722710228613	0.331746549017065	0.239677175684022	0.538806731686706	0.548148732983069
RAB22A	6628.63611515413	0.835769372896512	6.34644756165984e-15	2.64925010097066e-13	3.50864736077098	3.62791571111101	6.42008367855359	6.54709328738715	4.45445668179702	4.45835984088514	5.98427880614989	5.82834961476532
RAB33B	957.947428078204	0.346893937511763	0.0109318446106685	0.0407645983896584	1.4213857497308	1.41543747459576	1.89477021277944	1.769234992695	1.65010656950582	1.64132749572692	2.13510422758739	1.77934764331579
RAB7A	4879.38931222953	0.333878782892261	0.00850666116895255	0.0332425866252769	12.3787157119067	12.8231440959452	14.9839221137101	17.0998507498773	12.8075117405698	12.9515499727224	13.9629591534556	14.2436975080971
RAMP1	477.511776515319	0.613662360269918	0.00116501874042434	0.00639743340001594	2.88892970881458	2.10620429874325	3.99569917907432	3.89060190861733	3.94768000596318	3.18555031553983	5.23407046426848	5.85003047032602
RANBP10	820.683148218502	0.490037212671556	0.00223814216553307	0.0111085771702146	0.741063795676472	0.762316484806816	0.998315527881042	1.15327895661475	0.821772991323224	0.731752041681977	0.81089193585171	0.866028121722862
RAP2B	2293.11891623715	0.870210754312338	1.24042841108626e-14	5.00799828654973e-13	1.27972713697893	1.21842608524649	2.40376421918529	2.25681428508299	1.99918581220041	1.94500173781366	2.15654952100913	2.30399969009133
RAPGEF2	7438.1523316768	0.338310535811248	0.00124612419330748	0.00675233562278992	6.20484191874675	6.36125096667671	7.96505567616529	8.07538016928242	5.94303836712617	6.49101759351053	7.75244089127324	7.91710659084913
RASGRP3	108.609904313228	1.12052504424736	0.000315992856294658	0.00208025419616314	0.0697503921586921	0.0722811680807592	0.140870459323947	0.25275036932784	0.0657741326710941	0.0775580045141998	0.119138519838054	0.0912714394114904
RBAK	1470.87077607541	0.37922805336651	0.00448311655387348	0.019938885692581	1.21050926499097	1.29010220848681	1.61027860305272	1.68671524023235	1.37121663962361	1.30314779345062	1.33403309570325	1.35002415997745
RBM14	1923.30225834748	0.461195636293675	9.1895257505346e-05	0.000704582402358166	2.03547590832025	1.86408644034689	2.82191260321168	2.61975638196028	1.94592926268507	1.83803774232068	2.48288258144504	2.40747576469739
RBM15	1627.1554917361	0.424813060725555	0.000452206755962893	0.00282890674116472	2.73953597805062	2.53584754458474	3.72360477421901	3.45456515863576	2.77124980158902	2.88269770517668	2.9207882934064	3.01282734932281
RBM33	3133.13571799226	0.458954312145918	0.000339271929801042	0.00221246521242001	1.6854009868824	1.64124383066143	2.1655910140139	2.46211846067383	1.73687226998276	1.74386030913327	2.13542021450939	2.29716332619614
RBM38	178.149113650823	0.819214320568337	0.00177235589188812	0.00912490043311259	0.397676956781779	0.241651148462454	0.677217401723744	0.571468997580633	0.529470587929658	0.522693839957474	0.602546594804608	0.647393918887011
RBM8A	2986.79603266878	0.362099956540864	0.00244913441009065	0.0119886148738603	3.33943684969098	3.5255519127121	4.36684777424847	4.55776791140961	3.15075187339052	3.6070152219276	3.80645516171422	3.60109966870511
RCAN1	5327.69551108824	0.448907951116345	8.85076715332266e-05	0.000683256996282471	6.93923124109911	7.55748918723619	10.6655097833632	9.44256973620144	6.23590199359587	7.56284297605087	10.5918936864978	9.84484376141127
RCHY1	1398.83009359699	0.482477741044065	0.000216920291262773	0.00150299535826281	1.76461870487629	1.60620363300875	2.56972157409059	2.22582186515665	1.77728074596685	1.89621933625567	2.32603479179429	1.92608840268243
RDH10	5242.93511663217	0.702887629440262	2.44407074814014e-10	5.65060801172571e-09	6.3725741339585	6.69781214140049	10.6922675295253	10.9421486918123	8.11522307419304	7.59556288059145	12.3041507150695	11.8028367992764
RDX	5649.49294634057	0.463053301213242	1.64907060813491e-05	0.000154564656791578	5.41348411575066	5.73429289786933	7.88673300390024	7.68244237038234	7.79646170519632	8.08075055762238	8.01937675642263	6.78599311901055
RECQL5	1044.0695557886	0.6304233616596	3.6426902185536e-06	3.8946549569911e-05	1.07767073621797	0.973221595212867	1.63270939779086	1.60296188427473	1.18173726565373	1.12499997951616	1.46969823996312	1.37971970472841
RELA	2548.45339251749	0.361825274733958	0.00210333439328469	0.0105635342254643	6.0379360502138	5.25808952107185	7.43877870250283	7.21926532646281	5.41074820328649	5.45111020206278	6.91092111660349	7.1363446553979
RFLNB	2206.81823717568	0.816242914342993	1.2667097026379e-10	3.05387677864128e-09	2.95483366541785	2.76424207354859	4.91073120889783	5.36029424002389	2.16280045450484	2.47374160210878	3.37064467122922	3.34546470791336
RFTN1	5170.03559974381	0.358560147794975	0.00705741604271986	0.0286211550158279	9.75870493763915	9.89441955133082	11.6343357174711	13.8319430356144	8.45551477350211	7.93450662461212	8.50110377460799	8.89942597713789
RFTN2	374.524362578822	1.2828675812183	2.78287245628e-06	3.0625183052227e-05	0.346171618367295	0.45345449919366	0.785744105298962	1.55078999411267	0.50450029837816	0.493749672273655	0.69313083757891	0.656890970700644
RFX3-AS1	37.3623391608534	0.976568050331227	0.00559357139834478	0.0236711680734084	0.134960455863314	0.0832713397767547	0.368968202006581	0.300215120902506	0.0976654599577881	0.103302246203869	0.226078048405631	0.292400740040341
RGCC	4702.55148389075	0.570024830498923	9.49099366081547e-07	1.15333054144231e-05	22.9099515213805	21.5093488802396	36.7824000975809	30.3627518488183	28.2647568422654	27.348104269047	32.3240536999293	33.7161610343743
RGS1	21.7169464715252	1.3236302366915	0.000241505613061954	0.00164635252855994	0.0213358724949986	0.0188062144002486	0.149065841903569	0.215731594039318	0.0110285098353719	0	0.0216609910090364	0.0518858514226384
RGS18	20.5919287947269	1.32906375502664	0.000206630998918085	0.00144180632400902	0.00930356771110584	0.00922556601522687	0.15684923318245	0.0790191136619166	0.00360675974336287	0.00890149114530622	0.0460460157358759	0.0431931296310008
RGS5	184.642385881848	0.63205067443511	0.00868489817024002	0.0337829300409825	0.123650730880228	0.122614035388259	0.186171671084307	0.219338937800638	0.179240024207475	0.163314905061193	0.204676524688026	0.184521219337947
RHBDD2	995.951572193304	0.398253474745173	0.00988132116853166	0.0375723555817798	3.14398723479242	2.58452698254711	3.65116002023142	3.98659295690892	3.30829345626249	2.8030135403671	3.50149919661074	3.75065339674148
RHBDD3	488.286174463621	0.629587555412529	0.00499476816024353	0.0217006872365222	1.46930954125003	0.846397632074069	2.03645678808887	1.73405504729624	2.35904629464328	1.59114154222349	1.92457956396044	2.18400082358537
RHOD	386.301662655342	0.709716463120722	0.00115755853061844	0.00636421915716032	2.02555830991795	1.26918709160937	2.90527089224591	2.76491550187523	2.36260271732711	2.01385434382037	2.85664117041017	2.69268126780778
RHOQ	7324.60871771537	0.68853346971412	6.4508666988915e-12	1.81012390254165e-10	7.96356821704836	8.0950381005604	13.4653518298652	12.8098917446094	12.7885599666548	12.2309810227192	14.681653504794	14.1710186278376
RMND5A	1897.28887905047	0.798062420957654	8.40796576387166e-10	1.77962029665672e-08	1.36526809140485	1.52451620452334	2.72658132366849	2.44173552493703	1.73048342475772	1.50081472978285	2.39244909998849	2.44568709235767
RNF130	680.259501705827	0.406626373825886	0.00940393873541759	0.0360715460568698	1.6666870825987	1.69060637495121	2.1938961248079	2.33122534812185	1.97258519565586	1.79293457033579	1.98752753737533	1.93007113246032
RNF167	996.777120947508	0.486626265588306	0.000332633833741221	0.00217547031013057	2.70525449721458	2.59509825167518	3.80066646319066	3.74771446978432	2.41290632487278	2.45704764673411	2.94425371246317	2.97736194785234
RNF216P1	1035.47925892138	0.535236401760668	0.000102753262806918	0.000775090841864791	2.4062357007878	2.11732434843293	3.37526779967827	3.28952772518743	2.22862129821372	1.92115608431428	2.52627770284238	2.13240367356858
RNU5E-1	500.893876765734	0.743967414392967	9.33247592987453e-06	9.24701369608447e-05	21.2977428405117	19.1236680403873	36.8305368373844	33.3447260553883	24.1196753778946	11.7931667247153	15.0674945609665	36.8706250947079
RNY1	1557.80403786866	0.874343293009332	8.90731519161585e-07	1.09023925761633e-05	69.3167252263398	54.7549589330284	142.993717387798	96.2923697381947	107.557884507836	57.4500663032905	79.4049279324908	95.1675426485823
RPL23AP53	1550.10010684966	0.533924323961273	4.22260449251044e-05	0.000358510519530469	1.413618283264	1.42911795869256	2.02660523486383	2.15394541377794	1.52511162752155	1.38551371333904	2.05691561827737	1.84424994216304
RPL28	12909.340400431	0.383882217589975	0.00226600997236422	0.0112304085292144	15.5802763001569	12.619855202392	17.8877859862968	19.2715796717206	17.1925531474233	17.3567355805965	18.703006740829	18.4986979850542
RPL32P3	339.339004449854	0.64562276942812	0.00100587922019189	0.00566854852212306	0.782311903961638	0.843968446578162	1.27275986514202	1.38014676412905	0.826119731694067	0.748502370512059	1.00497256566396	1.02179665504629
RPL36	12944.1880275044	0.363144634168633	0.0027869473951339	0.013323953170444	134.191911183473	110.476763996979	172.887748068967	145.838518602661	153.38507169358	163.213187731785	157.687782762774	172.413529267799
RPS19BP1	1117.90378888756	0.437377506992682	0.0014557795065966	0.00773347125951256	6.52789672153952	5.61785314407585	8.69999796744466	8.00087238253836	7.66810230487129	6.42396045043078	7.56773958032358	7.96346809196313
RPS28	5242.83711896605	0.665064818285875	5.93490600428021e-07	7.55834309867136e-06	78.2573738350848	59.608265778698	113.805526697903	108.945866845837	95.6328569240892	92.4444905447855	104.655843566386	114.442975273827
RPS4X	31192.8111773863	0.500060458414955	1.68419549227657e-06	1.96199345676491e-05	171.067648229016	180.84570184127	249.373120109513	254.500445754721	254.309101972759	245.941216957406	261.473215496652	253.940941873722
RRAGB	690.788115633524	0.401921113607917	0.00856859918097736	0.0333966683542209	1.70897728496641	1.79029068456341	2.36080578706636	2.35060636571498	2.46081683459827	2.50891371406331	2.41663344027481	2.18894303944277
RRBP1	20278.1500180857	0.498616568120215	9.84502588127431e-05	0.00074763601933877	30.3105120537671	27.3540343608785	37.7820584670335	44.7262483660507	35.1672058171576	31.052436363583	37.0863499366365	38.0802991247815
RRP12	1582.23628129306	0.463805845635279	0.000282463485679411	0.00188657710805631	2.07857804186364	1.83312788795555	2.90499889913025	2.57605798325529	1.8598363368916	2.05129996383353	2.25558894525424	2.37589050093524
RRP1B	2477.26154113952	0.414623734629052	0.000240043626431144	0.00163803735998043	2.84023089915336	2.6037604952588	3.80737661461191	3.53662071700903	2.75575729603267	2.83759309436829	3.36791258205741	3.43183964655444
RSBN1L	1225.74287766754	0.35667131461077	0.00956927618142847	0.0366330201963827	2.35197514439509	1.99936925095215	2.99052929227599	2.66012464850053	2.59485081412249	2.76917925547218	2.79600845551464	2.73549620964639
RSG1	147.106960994266	0.730433498980534	0.0041877105442379	0.0188356451981435	0.492507615706665	0.3890113669754	0.851013069226403	0.746977558835305	0.733975607774344	0.648696167214191	0.662354226354523	0.704202274162567
RTKN2	267.370090022064	0.651432814100128	0.00144086175608542	0.00766626878483685	0.15555492139606	0.159353180921112	0.26944675385854	0.25105555661871	0.15835748419806	0.155648976283197	0.250450214114984	0.259104805649729
RXRA	3289.12219649942	0.351039439694723	0.00855045607089983	0.033355903766634	2.90469856575959	2.25861670195905	3.35608182336602	3.2979177996881	4.56569897236671	3.62414592038592	3.39033475369637	3.64658229040087
SAFB2	1129.05108986969	0.543312932134606	0.000974934514176555	0.00551484287086487	1.92163676929864	1.66795619922977	2.37876377248649	2.94917637634523	2.0285577742847	1.81557018651541	2.20050828365255	2.22787451210585
SALL4	206.567342759826	0.727742516216399	0.00246047656698795	0.0120354233520839	0.200595524954532	0.203698585581802	0.314722016885318	0.402098205898904	0.347942056776041	0.318558078712516	0.357441143914452	0.378552133296004
SAP30L	1968.90490302754	0.555795503418913	3.79778615424769e-06	4.04449273513386e-05	1.64417816085122	1.66143334625952	2.44694825215674	2.48693654103976	1.95479589166201	1.76195638636392	2.29418452464861	2.29284915984612
SARS2	502.865348896746	0.525227710072093	0.00258776663540409	0.0125427873616165	1.3453586117071	1.15496657684074	1.77518156390501	1.90161542265296	1.61901467384479	1.58220254479526	1.73222265658067	1.84344273407589
SAV1	3945.13012079377	0.704193362270639	3.7430519135405e-09	7.06063837247353e-08	5.85787100495922	6.51857758406683	10.2886278668075	10.2836977489252	7.4409313725501	7.44356377632344	10.7832116506967	9.84769762894923
SBDSP1	1666.67842675343	0.331960999949826	0.0102504674783052	0.0387363991740927	5.18348844841883	5.51648781221191	6.69825202624931	6.93481581174234	6.25467566319231	6.41063485497169	6.8149897955634	7.15946222250474
SCAF1	1775.59121613423	0.471822043657319	0.00362521787001708	0.0166715646691537	2.64894445718395	1.8352737401031	3.27205225705883	3.06531136257252	2.81082655942208	2.20907849636778	2.9893611491129	3.28665366286807
SCAMP2	2797.79367270064	0.585817872088795	2.16306094808503e-07	3.03479246087656e-06	5.86538695719018	5.35630108223045	8.54309202333249	8.52400153575538	5.28978693292997	5.25150259390248	7.76441184834399	7.57886471144923
SCARF2	1475.29014619643	0.888440526467826	2.56610806032296e-05	0.00022984510937661	2.42917292041221	1.29408790259433	3.70504168724501	3.61964689930548	2.86814423225125	1.78595670827021	2.85558719455404	3.77245006189209
SCG2	349.002745183934	3.09343991429284	5.02813627500895e-32	8.71865937429436e-30	0.085349020273539	0.161572947572276	2.01870619725631	1.31800932196587	0.144382575107559	0.103931484873074	0.8596032058935	0.846523204461381
SCN11A	147.933695001945	1.82121362895752	3.5467743922599e-10	8.03519659218008e-09	0.0458902791820988	0.0546066386398757	0.192371034362141	0.299748185617671	0.0996268542939019	0.0702512286003931	0.180534547362414	0.171456225847944
SCN5A	1256.79297986884	1.09084112553631	4.76022188029184e-17	2.42950946909234e-15	0.613981900641523	0.587734122470583	1.32212055893302	1.31426362090256	0.817115468391082	0.726257928543092	1.18775903798858	1.27475680573681
SCNN1D	570.036400432442	0.496077580132889	0.00604903039384822	0.0251887734226592	1.15659431402652	0.850993517403262	1.46190930938239	1.43407188622978	1.36794689284126	1.00657677130837	1.33094696761115	1.52118492532194
SCO1	1261.51711033267	0.34765143231744	0.00642295081423837	0.0264768088273618	4.24381127259984	4.00891343280831	5.3759737521631	5.24757016987122	4.37107819422334	4.56659436918645	5.05495470924834	4.82563965840598
SCRN3	1142.21743790982	0.390751304989816	0.00541048859811756	0.0230623568514151	2.02306887426455	2.18435597038879	2.74607306922389	2.8561951508859	2.17422754644037	2.03570221550113	2.60552880722281	2.64452063383478
SCUBE2	143.174236384254	0.788832686732359	0.00185591538389217	0.00949007771914617	0.148262650373863	0.127416992736306	0.268293201761911	0.254421322159024	0.211846413667422	0.21278267280849	0.279003081974226	0.290784447540844
SCYL2	6008.76451359127	0.367379874911732	0.00119511664222015	0.00654146199353602	5.27470411846792	5.80772201401716	7.58415086831425	6.91259316177656	5.49398142182798	5.43543242161016	6.6671493830705	5.9490466443076
SDAD1	2689.34523101936	0.383503890146623	0.000599385879589191	0.00360457715493277	4.85081096732376	4.94720977566541	6.58247672429012	6.35473481343746	5.17179019740342	5.04100706386139	5.58315358003639	5.64986531445638
SDE2	1749.62485299226	0.467534779124548	0.000168788209606853	0.0012053117924671	2.30473901690424	2.45324346071909	3.49295215475712	3.20488951166315	1.85259158481737	2.03129518909948	2.72330769794334	2.48766061057539
SDHAP1	550.049665528144	0.505519524637379	0.00230626983900646	0.0113923665349022	1.23774612540335	1.12806710260054	1.67185928988435	1.75576158651827	1.29511053948096	1.34138789187849	1.67445938797042	1.64980192577067
SDSL	53.3988031055789	0.873543629137627	0.00977146946699857	0.0372174386204325	0.182954855870371	0.106991842821161	0.320628221301754	0.377805659233976	0.491033123029762	0.383759102567301	0.35362560744971	0.261351940926648
SEC63	4438.75048003015	0.492792626861876	0.00121796193840464	0.00663057143548501	3.53684430105399	3.81264966711281	4.60945982975506	5.91792485936908	4.60024171467217	4.28873843380854	4.19036453202523	4.3718234678372
SECISBP2	1994.76773976076	0.433303618453071	0.000384466078543825	0.00245394228990336	2.90904454711271	3.02100756233922	4.01801474420665	4.09764296247681	3.05098469399601	2.81920380635571	3.51426900500157	3.60470478898734
SECISBP2L	5610.67350699085	0.540802297602247	4.56451744736641e-06	4.80428781911523e-05	3.93004095081185	4.34573019457754	6.02737084176947	6.20276049384256	5.52175814706033	5.40877243412277	5.6280424599261	5.5774026253333
SEMA4C	1556.73452701578	0.567796554263013	3.42773458604557e-05	0.000297180194078631	2.53946538249593	2.05205210289425	3.54555958705604	3.37608162033795	3.68964819996498	3.09358769442438	3.05015964034185	3.36293275057486
SENP1	1271.81980274887	0.368541184559812	0.00569462695852075	0.0239787763430863	1.34231734154777	1.3268028924095	1.69812374098379	1.78787827279084	1.33486384430614	1.37415434906919	1.51419081087527	1.59858019855498
SENP5	5421.94444674443	0.375426427777948	0.000344009985592492	0.00223904478110609	4.78416092331804	4.97100323740557	6.62476774319977	6.18252098745833	4.39141727370506	4.37456704330986	5.8255839220366	5.81405656534837
SEPHS2	833.462974332502	0.485864332168297	0.0123585299935182	0.0449809252320596	1.99901062115944	1.81530964120546	2.25101468279903	3.21338953801428	1.99088995659531	1.83952476042681	1.8484997725019	1.90286509775608
SEPSECS	760.159623323792	0.387466888310631	0.00803668307639208	0.0318104005291785	0.75299566584386	0.763041743964455	1.02286366450571	0.994606724607505	0.785299255831914	0.85067585020912	0.915210445627153	0.846422471570728
SERINC2	2714.12822842658	0.527812296650197	0.000222336141631123	0.00153266886623901	4.56028173355908	3.57786374308478	6.60262134396038	5.37627690126761	6.15388518190369	5.75393365818434	6.80764848030828	6.75019788817289
SERINC5	1556.2631241561	0.525481874693262	0.000356433152350986	0.00230879233024286	1.11124118050261	1.14143927839723	1.51282042030985	1.78594685116224	1.14177884548298	1.09831009109232	1.48848682726313	1.44519515652853
SERPINB8	2130.06485232832	0.495136889423661	5.8596915981886e-05	0.000477728755882699	2.92279099168213	3.14481903330729	4.33515439059495	4.35459920708723	2.30296753962006	2.35771369568773	3.75464758264684	3.77735751017681
SERPINE2	6070.79369036769	0.543242371679427	5.2295085729363e-07	6.74252654422912e-06	10.5409589991107	10.5553455758048	15.2305787243992	15.8979432416896	22.793367120885	20.3179746818397	21.2877118895415	20.8453245189009
SERTAD1	1007.16167345608	0.714115418680664	1.45213891741194e-05	0.000138701828093196	4.71991994273176	3.44867735399082	7.31214344321832	6.49801643313643	4.17321557857567	3.59690420001392	5.86370216985076	6.73313553703124
SERTAD3	1115.87910598801	0.348710536290817	0.00859431155997283	0.033469065317775	3.74995008312781	3.8579789554921	5.02038484938722	4.81137604026675	4.16545305727223	3.41161974508907	4.47529426912383	4.67857888413323
SERTAD4	187.587250638726	0.944965158139198	0.000265543196011228	0.00179125771872911	0.337902984646887	0.433619980337207	0.720014741345976	0.952631182810193	0.389136685558192	0.418387815883467	0.556198262785693	0.484470748064848
SESN1	1338.58999776788	0.534951819257427	2.45211268702059e-05	0.000220970416607287	1.99781369350236	1.91293927982215	3.03267496757328	2.73913056257922	2.73792400154907	2.47676452675493	2.98170461302612	2.94347404964142
SESN2	1999.57699233971	0.683826855993346	8.221324901052e-06	8.25489378520625e-05	2.63593173950965	2.96907374291635	4.18825158126171	5.05052915939789	4.49541504577732	4.01303215496162	4.30487176877626	4.90145214552664
SETD1A	532.848710933313	0.593859004546699	0.00105406943569799	0.00590437838666994	0.45333794021665	0.396860989912271	0.603475112485407	0.712444139140352	0.424673728628893	0.454470882427611	0.505406609375714	0.528480279059055
SETD1B	691.72237815901	0.573683325277004	0.0046448441516385	0.0204630349025768	0.468768688531054	0.403262493001158	0.548133017684217	0.789272529952674	0.537165137348761	0.483458503982487	0.528447563143274	0.605656299955308
SGK494	339.915524958901	0.476919757716579	0.0131281080808166	0.0470476051385916	0.501676239833446	0.469542005699566	0.671328807450872	0.716832301299975	0.436060975217344	0.487573936463296	0.552881175976547	0.493839870383247
SGTA	1949.91391238001	0.501645381946986	0.000378097903163076	0.0024212945739965	5.12480898666153	3.95206909076914	6.63024259573509	6.41951059959598	5.22673237660427	5.3404621093203	6.26842412922734	6.51203397862559
SH3BP5-AS1	708.184106935475	0.98204147972143	1.97958341899104e-08	3.39769869820479e-07	0.531567476580775	0.553732538119321	1.01124128085973	1.23131622450132	0.574513157829333	0.577092053520339	0.805412955064384	0.867733648888675
SH3BP5L	1901.8520988711	0.339143218655232	0.00567023669191746	0.0238983955307522	2.66884583085345	2.32138593616472	3.27870200502856	3.09974675060504	2.41446415194237	2.13625149465835	2.90725088881885	2.97974443643632
SH3TC1	52.8166028150068	0.928466998405758	0.00500251500104474	0.021725023554803	0.0472787914651131	0.0416732472077712	0.114893708470802	0.109267662973705	0.153612808925355	0.129244349097576	0.123426594526671	0.119454954949067
SHANK2	2334.20867293614	0.494360702165363	0.00238498054178954	0.0117169857710511	1.24852556592584	1.07127916153562	1.43732924407398	1.8852377304151	1.60912339300573	1.53637585104979	2.08781311729606	2.22221930337778
SHC2	56.9178070667964	1.39788079898112	6.62809937781463e-05	0.000532333991003224	0.0800166509235045	0.0238037358893284	0.273446762914527	0.224515693227246	0.316408566259167	0.168428775921011	0.258939603326247	0.350260703509038
SIKE1	3850.37582559619	0.330660171938445	0.00177503151552457	0.00913519834378607	4.05196510259555	3.96156902619464	5.34151257944463	4.85048266498165	4.23675408502973	3.99891434598793	4.99665192906971	4.48218309746348
SIPA1L1	3268.4741422135	0.372349047008407	0.00252101804955987	0.012273854974909	2.26304464071245	2.1127980200675	2.71334237475298	3.0031905783791	3.12029101502393	2.74196482912135	2.55519600275249	2.73923490722879
SIRT6	400.119155599126	0.597844160669705	0.0131172297624019	0.0470335452111573	1.52227417276492	0.808870222388587	1.96832132982168	1.76340520181007	1.59896567310034	1.24763084657938	1.70584980575913	1.89352264742466
SIRT7	783.482609858189	0.619498891016414	0.000462786924230333	0.00288575064555798	2.6804191288994	1.92439124722591	3.95554091054688	3.34669618833466	2.86487364259853	2.97270464907612	3.80099086568418	3.88045729158926
SKAP2	1108.66441189791	0.41720854608191	0.00221425835317316	0.0110102368480394	1.39707086615694	1.49037928151631	1.98211150258619	1.94032864805655	2.96345432606037	2.93491291726449	2.36235143246198	1.99727230294682
SKI	2902.22933898972	0.646631673124945	3.40184378252361e-05	0.000295503771089479	2.88484773274324	2.24691917619147	3.71241074290421	4.49048355991494	3.31448075049241	3.00440533712989	3.45066760292963	4.07133548522343
SLA	571.32489889245	1.14978102791682	7.30824451952175e-08	1.12450520052937e-06	0.617940035088766	0.596345994523118	1.17150832788246	1.74556979692541	1.09085286736296	0.678335708628315	1.31282703145209	1.43077775014306
SLAMF8	42.1289586928627	1.26783948864535	0.000317042138380581	0.00208560064280027	0.0241892760488752	0.0379785800960173	0.112973839576008	0.158673202344331	0.0117219691659293	0	0.0414414141622883	0.0381025107816328
SLC12A4	8461.52314305803	0.573669573628642	3.65228196051506e-08	5.94429765535093e-07	9.29315071403177	8.34181332647018	13.2668302704758	13.2896001564172	8.91098218683502	8.20580755559745	12.5951336079124	12.915647509249
SLC16A6	151.746897330119	1.75272527635125	1.31126363382324e-11	3.5900487140606e-10	0.105961872957462	0.0883951514910296	0.400046737285584	0.413255550634811	0.195613139052171	0.173798519909114	0.097971484808444	0.0535448152044771
SLC17A5	5337.56536948812	0.481024901884705	6.59277932142169e-06	6.71946799715361e-05	8.61113410339785	8.89124364027253	13.0797854464735	11.7086532496211	3.52507980409329	4.02730695720296	6.94650137813855	6.64176758626951
SLC1A4	1348.83312804745	0.981090887692796	2.45827183294857e-07	3.41006426057738e-06	1.17364565090634	1.2231694882767	2.01919011172895	2.96716819052254	1.75682338211009	1.31673789408783	1.53287552594149	1.53741377137672
SLC1A7	116.617314528528	2.83714977187484	2.41914135478e-21	1.84852467928811e-19	0.0277245800782468	0.031157753519056	0.384034033378687	0.407878971442134	0.0709376183478579	0.0954950189275557	0.236435223895245	0.211460827446654
SLC20A2	11374.5688962928	0.399735103127993	0.000216640777244957	0.00150182804317686	15.393336342636	13.3883123065669	20.3856922444258	18.0235118526104	15.7999916403281	17.4517606292525	22.8696419229903	23.0983396869084
SLC23A2	3222.93985042152	0.51852007005997	7.20333455907656e-05	0.000573088823008886	2.57371017484312	2.31281122165461	3.31322917397657	3.77695848891612	2.90557313934388	2.87379645891385	3.18073817032643	3.12695014412281
SLC23A3	174.558678881598	1.77533050292571	5.71945882873591e-13	1.90063097441408e-11	0.185696210362798	0.180047336748782	0.819800482065205	0.713493437010681	0.172775426415931	0.201360344053096	0.549867123396781	0.533693911627285
SLC24A1	496.019769021987	0.853069654449432	8.29011407976104e-07	1.02396157925816e-05	0.371891033934465	0.308302222268699	0.662776214715524	0.615895869245444	0.420891625056182	0.456251587400423	0.493261196521376	0.497280170136635
SLC26A2	2181.323258131	1.01865368205878	5.81963809516421e-16	2.67723147064952e-14	1.18130538821968	1.12238864507976	2.29605700930329	2.48659101298345	1.20813944991162	1.28867686515685	2.00783437780301	1.90461642943783
SLC26A6	1431.4072221189	0.487685450804823	7.67196051504295e-05	0.00060538661590406	2.66602789332076	2.60887577005818	3.87490009457433	3.64071075911822	3.57069214592924	2.98623365004095	3.74966278584354	3.493606121845
SLC27A4	1182.15105742771	0.378122479865974	0.00412365817774421	0.0185970246262056	2.21041241241364	1.98342452833311	2.80244715606257	2.71419370515929	1.80098740276531	2.03423164628447	2.29163931881991	2.20731526954133
SLC2A14	249.114757581529	0.97380585006626	1.56442131343133e-05	0.000147756971118427	0.256974451972009	0.201823217790738	0.552426263325664	0.432387752053089	0.34569875167317	0.264781643390041	0.382973520708799	0.457404933812898
SLC2A3	18214.8916467325	0.967938878383078	5.0641058554681e-22	4.28075198095038e-20	20.7847030128062	19.8106145308261	43.2945801618099	37.684052915729	23.5297248101121	24.6356226796471	37.9898922844329	38.3977184144162
SLC30A1	1130.18225429613	1.0622383317892	7.27081878399768e-12	2.02758400110451e-10	2.34371070339758	2.29137367211196	4.59607367851342	5.44748573250632	2.61078110075253	2.3323075727934	3.63690507836534	3.87295694719257
SLC30A7	5353.96250418598	1.35524920722504	1.1115451996687e-34	2.2438281829133e-32	2.26377000413585	2.44389914916026	6.38702499892349	6.02064158016376	4.79670511375621	4.67349412085409	5.72593638717499	5.29521017654192
SLC31A2	699.099506045867	0.438156936603912	0.0138710346766872	0.0492145183636398	2.17672804692915	2.13802752424473	3.53674255113936	2.51657471248486	2.08458107805377	2.14723385123057	2.97650893715421	2.93958847198
SLC35B3	1526.87014887603	0.556070567183354	8.08187012729823e-06	8.12693631759915e-05	3.20624062634625	3.22027260307419	4.80667251157724	4.79865622866762	4.68090735096606	4.85556038455234	4.68198983532856	4.14969974311623
SLC35C2	1979.10358452527	0.515619423698412	5.55987635410305e-05	0.000456848892401238	4.35997733099803	3.66904009110311	6.14923408255444	5.51363965387804	4.70165919631539	4.52219175158254	5.40835822842435	5.07172901039642
SLC35F2	1085.13851377933	0.694511199164676	1.5358537579823e-06	1.7984781018797e-05	1.64622521816852	1.73126331581645	2.68774647497865	2.91022873116868	1.52533510439932	1.70156776912859	2.31762524944406	2.20871834871315
SLC36A1	1961.50666399443	0.381939017478331	0.00416395687947267	0.0187537518464428	1.78294667914983	1.78817369869512	2.21616657488124	2.48929220487357	1.21178592385327	1.26020869087887	1.98256561474502	2.03157649540697
SLC37A2	473.579507575857	0.651844041149019	0.00247031704366192	0.0120661025697102	0.556451351434146	0.553358068329909	1.15288005277756	0.711234572133085	0.376131060176531	0.416366399752476	0.639168299937105	0.635599431645345
SLC38A9	1394.71449358153	0.708062942596783	4.02979239053234e-08	6.48844548594642e-07	2.1041343467902	2.22726105613264	3.68550330968793	3.5558868815697	2.37500510897169	2.08865623879605	3.05296876068581	3.10490732981367
SLC45A4	329.106242036539	0.619873755195923	0.00180469607693444	0.00926671011409956	0.229932881662358	0.192092217169417	0.324668347990023	0.346818993321894	0.369291006313818	0.314279666481215	0.348231010370204	0.348570103030918
SLC46A3	319.59742901391	1.6181458937629	1.13825522759241e-13	4.08352836954571e-12	0.250645459059068	0.301803467175761	1.11759262032428	0.846285238393382	0.462709309181421	0.393978826842418	0.613441985954926	0.550164369665543
SLC4A11	166.591976391742	0.926678885599402	0.000157938080365358	0.00113381769476723	0.215786485968442	0.171542997969966	0.413205780212303	0.397706774404156	0.201195583548801	0.169872762514963	0.2932550112497	0.315219814871894
SLC4A3	89.5232762585635	0.789947708005011	0.00761118055366663	0.0304289733929474	0.0991810642433942	0.0823391363494936	0.168155642276796	0.193105209654778	0.219969823599201	0.191996274859145	0.194945163708407	0.215698205059904
SLC4A5	214.378869284736	1.10438548089426	7.79521314246204e-07	9.69028104336389e-06	0.127924056027705	0.133039412353729	0.311346244838928	0.307592913045897	0.145150087232896	0.165681717811264	0.32191175635236	0.313507624259856
SLC51B	65.580308459174	2.26242283744484	1.41619247063903e-10	3.38409949918601e-09	0.0530748743093671	0.0491212318151175	1.21885112858599	0.531284950660977	0.0164606375521561	0.0406248904397486	0.218228723514178	0.147844568710367
SLC52A2	2050.71236467945	0.68659386912392	3.20678383513041e-05	0.000279817750775089	5.41449476280281	3.69486403353108	8.08902981051406	7.01523898618271	6.48643686952018	4.84626862905233	6.8712518320401	7.70493037874264
SLC5A3	16892.9506134986	0.344368883711759	0.00741993259044813	0.02979649295897	8.59421169592032	8.0933962672591	12.3052614871699	9.22961659400529	7.36974310586009	6.83302408487853	12.7831472782913	11.4005247859557
SLC6A16	99.8402314453688	0.95799063753367	0.00259601538003534	0.0125756117532156	0.136080141427358	0.123694300562154	0.217017096804719	0.411748718542202	0.213657167272616	0.149728968855671	0.183917175024135	0.243683220747105
SLC6A6	7866.95924350275	0.717007378087785	1.23920143265659e-08	2.18231762717192e-07	5.78812315312137	5.39730379931995	8.65016181261062	10.0571673860639	7.29018469654824	6.87472779976775	9.47854464087301	9.84852860478315
SLC7A6	3010.97618280152	0.40880641464615	0.000464653160138419	0.00289605253035582	2.5573137833531	2.74083931561409	3.57082580630426	3.55672259921203	2.65227072628848	2.55343671030201	3.38162200366124	3.37137366024692
SLC9A3R2	3498.82944978293	0.56867359256522	0.000931605133351419	0.00530092680315805	9.39113070132801	6.04356561676717	12.7102128752674	10.8182939809068	10.4572068897781	8.57317567312291	10.3691223544024	12.1321748252647
SLC9A8	856.110852620787	0.650936261500273	8.92188722973185e-06	8.87921447992077e-05	0.685094944573624	0.678307515516008	1.06739726882445	1.1219097486826	0.68540417714404	0.690224665207531	0.931519421329716	0.97995016863011
SLN	19.6424547588625	0.931221700962636	0.00974390171233133	0.0371438192388053	0.0683429888367192	0.0632519971317952	0.236667548994845	0.335840897827537	0.180165060331133	0.0915451298265568	0.385083460366469	0.398881367375133
SMAD7	608.133070791455	0.665071432654086	3.33438510290229e-05	0.000290203079258388	0.921320640450407	0.842730275374673	1.40989277995554	1.45974808162639	1.04680860530581	0.75676244081361	0.895651159740513	0.841637158196896
SMIM19	809.859548790594	0.384088493278264	0.00972943519268905	0.0371200595151253	2.84448685760516	2.9917783652967	4.15913752611663	3.6277914084813	3.08270517744863	3.1863603209421	4.21980319096459	3.97661795318339
SMOC1	687.407569344141	1.03373698146283	3.98889501517679e-11	1.01409408045613e-09	0.809470770970336	0.750955585201059	1.62287474176249	1.69505820484414	0.560676556535852	0.702202000245736	0.760170162432457	0.934151960838586
SMOX	870.343290696204	0.648740178180151	4.94849172802496e-05	0.000413137966799614	1.91572193762024	1.85422756981461	2.78309712836836	3.26645400808423	1.95493985977802	1.93156226821792	1.9656277014413	2.13091595743667
SNED1	292.928191143532	0.719683319909318	0.000931630536865559	0.00530092680315805	0.227769961039672	0.184356075924708	0.323324988957654	0.38841504387678	0.401881383608025	0.291965392734599	0.260145839561336	0.287604322174563
SNRK	3527.42664879542	0.644573204289965	2.2130191111585e-08	3.76018636663552e-07	3.31773430984836	3.53277261832751	5.41745001312709	5.47594421559852	2.89729315733453	2.91073639747115	4.66782103143397	4.43005858563501
SNX8	2042.9981799579	0.470383370309131	0.0014136326842452	0.00753028044679649	2.68932113227007	2.01452442532372	3.52167264953061	3.11103808938156	2.89996272214768	2.58115531733426	3.34980391176032	3.72932419294136
SOD3	242.021851367172	1.08935326153874	1.78095802435036e-06	2.06228230131323e-05	0.724373104701028	0.526321859717619	1.41539430526882	1.49059244020395	1.22954180172122	0.668092132182785	1.61492321375824	1.93902970429817
SORT1	8829.12223485308	0.373430097291527	0.0136863016605973	0.0487380805580775	6.71896021989638	6.86705263410292	7.68524883815958	10.1440388224291	6.96779212690981	6.17554106247784	7.93941713759322	7.68733958035994
SOX6	1777.67239910251	0.556714349110921	0.00172544893749491	0.00893441687581111	0.939940548807221	1.03914477825576	1.25086030830713	1.73689370313668	1.19480705897643	1.04512661376423	1.12629056112681	1.16410595091122
SOX9	1221.72419274658	0.380050814381074	0.00316194562546395	0.0148336158808186	1.8287221817199	1.68847322287581	2.37148825149385	2.26426539909652	1.0363841675886	1.04350411259192	1.65895578045866	1.5543597767821
SPACA6	454.659501438923	0.649707435791495	0.000426361827917765	0.00268961927359504	1.08036855260845	1.06975127064034	1.61223694257407	1.87184031101564	1.23637677613972	0.943400233545273	1.43330470258695	1.35797974222856
SPARC	171434.737499224	0.341263434405015	0.000605215533868504	0.00363478689856639	270.03064948931	279.605088357329	349.463108543153	353.411466708103	294.030086958106	248.968000221806	346.530642596915	344.566406717691
SPATA18	799.288085869345	1.17160823622066	4.4009244677087e-15	1.85428359581807e-13	0.695780661686115	0.708434523929366	1.63103432396731	1.66808602283082	1.11190499447042	0.933279433734673	1.59958283588295	1.61883962198623
SPOCK1	1693.58156166515	0.580484758971403	1.52134673734752e-06	1.78303419606804e-05	1.82528308159357	1.82569498247054	2.90667583125951	2.65550754290736	2.02107438534003	1.88484510843876	2.32004381336697	2.46916633768908
SPON2	11525.6180212946	0.731438437885921	1.21339412648944e-05	0.000117811597708325	27.0862274981682	17.9806542351193	43.5451594736651	33.9219276113124	21.5635016472508	17.8256672574492	33.1048917614679	39.4423285810193
SPPL2B	1146.13337154722	0.560398259723891	0.00189884476245777	0.00968761803554934	1.89884231841072	1.24144923335177	2.49313109003909	2.26745723920684	2.28951719640906	1.69916399554875	2.10502106799881	2.4458989124224
SPPL3	1679.66897658414	0.38378362826629	0.00193037902104172	0.00982967468975408	2.23292384742765	2.35957983003401	3.11836065881877	2.96367298882405	3.00166443170753	2.53642374204771	3.05265345542746	3.03402856052545
SPRED2	1522.41258005351	0.477712679046072	0.000477411471989082	0.00295352240781673	1.81965779825732	1.74056670816959	2.37396168953267	2.64983952048535	1.44081907451152	1.56034525430948	1.93125902128342	2.03088323171236
SPRY1	699.477113158842	0.592238258172007	0.000374625542384397	0.00240133197191894	1.27309885946152	1.10191058469277	1.71036019588929	1.94681127954979	2.23368848808705	2.07198964393456	1.37661082559262	1.36447333907261
SPRY4	2387.37554672762	0.358242364333578	0.00832373098245433	0.0326754535466763	2.51661843000806	2.4138257303554	2.94935298189752	3.43275693010364	1.78061183399575	1.88831189353733	2.05221539306649	2.16684938656065
SPSB2	84.7035684964852	0.807150840474855	0.00719623849926021	0.0290708260760139	0.278643090124177	0.206133740652725	0.538084079584094	0.458837002843571	0.478387278859536	0.393553626135065	0.303095449325247	0.325610062040689
SRA1	1713.99754627572	0.476641281754476	0.000204198950563627	0.00142875882378327	4.59541635108651	4.27629539544209	6.04184261685009	6.45478465030204	4.43451453294349	4.21985256920487	5.30459292972447	5.37853883181794
SRBD1	1237.07585112968	0.651405977241649	2.39489054569412e-06	2.68358696193148e-05	1.58828069996066	1.77674561515506	2.77910543206738	2.64407334356449	2.03779484541865	2.31822517061364	2.59766092292308	2.49556082141863
SRD5A1	780.050661423723	0.528945399520967	0.000316075591357875	0.00208025419616314	1.45327825318466	1.29043406263633	2.07986570740727	1.95769601872961	2.50456691732011	2.35116049138883	2.0043963255036	1.90801314900342
SRGN	3509.84961777845	0.576553153535856	0.00116579811826979	0.00639752729034163	11.9961142877217	11.9500348051103	23.1201810455948	14.0533163960414	10.5130490941173	11.7174481582644	22.7676700807443	19.853413512535
SRP14-AS1	144.186868964769	0.829298591145408	0.00111753082793162	0.0061995916520817	0.210381128286527	0.174841148698215	0.397134750493094	0.35919440366338	0.235357368855677	0.299057928417908	0.334110999722064	0.404642865767531
SRP19	1572.79183875222	0.426191889740897	0.000899216817495764	0.00515553516601535	2.86519060428318	2.97803926254915	3.91657029796637	4.0447356283922	2.66427648572599	2.72858409047963	3.53435532430493	3.29118390000301
SRPRB	2534.95862553182	0.41741360546042	0.000673103410097624	0.00399286123753086	4.80726565835136	5.18229119761956	6.66135014981246	6.86283637588331	4.6933487438682	4.66029429416713	5.30783352597402	5.38647618115117
SRRM3	120.847430179818	0.995272543457364	0.000206828187964707	0.00144186916241282	0.131999390425996	0.128221419671674	0.294590162725196	0.301527419965748	0.346722176517067	0.203618005133351	0.272807725519384	0.289439613843653
SSBP4	1236.33728105262	0.571635833122465	0.00226895615600415	0.0112408908461378	4.35528795116149	2.8238130784436	6.15190642112274	4.88474758726792	6.20391941676141	4.20446019159446	5.69713154963747	7.46956445715037
SSX2IP	926.226197806672	0.508195367683725	0.000356994160635937	0.00231131930234612	0.783362227294289	0.837211816795629	1.19128330082602	1.16286421442737	1.25904762042293	1.19452726182627	1.00779319523982	0.948183962325846
ST5	2240.30515787642	0.468837499194347	0.0104081186835995	0.0392225704083819	2.59154289571451	2.56841326504259	2.93372982541694	4.36091307081302	3.05020336872418	2.45316487721343	2.31722537212795	2.43473317677634
ST7L	1125.62548315379	0.573915755973108	2.18051762021538e-05	0.000199266897387926	1.18401529662551	1.25153852180175	1.87264738339831	1.82974060578908	1.34247240385363	1.4106005442904	1.67045988508143	1.49767022133213
STAG1	7262.10642322608	0.326801167968616	0.00246949697938962	0.0120661025697102	7.84957459704498	8.40942665699636	10.3832178638673	10.230833233538	8.706931661299	8.59142512171544	10.9948900988835	10.9387209951953
STAG3L5P-PVRIG2P-PILRB	294.150421794258	0.651673746040289	0.00096330428062105	0.00546047376169309	0.391958775206637	0.368938640918509	0.633956395275638	0.614161583301215	0.438750500414649	0.392404313742941	0.541555767798895	0.483767706991184
STAT3	11844.2280335623	0.390240584871557	0.000110454368772648	0.000829020720116573	13.4311770001725	13.4591695404992	17.6484604603355	17.9381358362809	11.630418536047	11.1632673251915	15.6183770587567	15.540462698531
STK16	1018.29745473569	0.407142369230803	0.00305895863555385	0.0144355950962547	1.76251826398452	1.85585972488361	2.52937501440067	2.35817839566574	2.02892288707798	1.87473137788394	2.27057270784148	2.21576395238562
STK38L	969.486046191119	0.41655708519092	0.0051978683609507	0.0223675372516253	1.0122969943825	1.10283169253452	1.3864351861663	1.48544198885272	1.41339897443032	1.24768477290523	1.32540420294681	1.12461120498792
STK40	2733.99678708249	0.562311832154285	2.89242218406061e-06	3.1624907065012e-05	3.92588423057243	3.42891797191169	5.42696524912322	5.57491499193546	4.09684171770086	3.87833118810575	5.31190088667551	5.18216924719619
STMN3	199.33454205654	1.91473066607887	1.82669439869856e-15	7.99548276453011e-14	0.182614867682303	0.159353755585123	0.862039251915993	0.716795069197819	0.322826120074862	0.262084075402844	0.481106705410168	0.50626688922887
STOML1	882.893382792488	0.550146827670297	0.000471225974379597	0.00293026726596968	2.01988521263361	1.62254506569489	2.95371421846429	2.51137727310553	2.13975372809216	2.05618683408559	2.77793499406159	2.91816879666397
STX3	2317.31362636388	0.354046554711656	0.0138429948681442	0.0491537163538067	2.10194535427021	1.98244946686124	3.06143253379717	2.2671141594135	1.45051900764621	1.72506774153033	2.59080840971341	2.49687975346837
STXBP5	7163.60153534897	0.4530744810028	1.5049965110303e-05	0.000142942962160708	4.21870337549365	4.20660950984723	6.24512874843287	5.44886242033369	5.71468558370811	5.20625868178344	6.53334470278078	6.16279506275547
SUMF2	5841.92462597659	0.559558767088796	4.50339876192363e-08	7.19958253605404e-07	15.1662874526011	14.7854292808592	22.3518206339038	22.3319643021188	11.5256518634425	11.3595421495449	17.6993576308994	17.5690788516477
SURF6	727.222267793648	0.581153280356813	0.000443426899385487	0.00277912363956845	1.78577589972409	1.45514496405838	2.36496476901603	2.58374878619535	2.058639391716	2.0937510594237	2.04124161603374	2.39149845172453
SUZ12P1	536.569872502394	0.449631532251695	0.00725747534125205	0.0292473701639886	0.797912487666818	0.838089591419495	1.11730850182444	1.16716983613551	0.776021140658904	0.800669162790643	0.954726737527224	0.905361385219159
SVIL	12399.8700304337	1.01388611974442	1.57834877969388e-19	9.9753117968971e-18	5.87781643525452	5.93863347723138	11.6660151981793	12.7039822817806	5.63343203587575	6.31853336584753	9.80408160016438	10.2157340476762
SWT1	570.468783418836	0.486775512518526	0.00221809660714807	0.01102526887603	0.776494156055622	0.782524435998787	1.13172903190211	1.10404102064151	1.04329982599268	0.907495176173091	1.08812162661015	1.07361087013286
SYNE2	5959.40495660225	0.517909198679171	4.75425167650243e-07	6.19472581162769e-06	1.42876770438882	1.43766969009503	2.08554297279194	2.0692717610041	1.04075043554138	1.13768299215872	1.7323234342696	1.75555605992931
SYNGR2	1661.07127309223	0.695399868058929	3.54344740413068e-07	4.74036855992754e-06	5.24437136419043	4.21797758906646	7.97403677002849	7.65642095973018	5.24960873284978	5.02321280437432	7.60633048324692	7.23429923084705
SYNM	1283.15334901255	1.45752142782986	7.3566307952772e-12	2.04729282934412e-10	0.553508519242106	0.573082627990065	1.28699252572652	2.14359681891391	0.510156673013457	0.464686884119109	0.602229297581589	0.581251082216071
SYPL1	3121.34077087484	0.658114496596707	2.63628844173106e-09	5.14856490522221e-08	6.42573569402835	6.32377239854193	10.1684156173516	10.2557681392195	7.84303710924744	7.54390558658086	8.88693698601037	7.97674613383343
SYS1	914.997622715856	0.534417298162568	0.000161255773753352	0.00115579456280556	0.887104400384754	0.90776733057218	1.32041578499654	1.33087973024972	0.931417812962341	0.907118664005166	1.10748386245271	1.0443358839711
SYT12	31.6306108281393	1.85744019499538	2.6515050713475e-07	3.64817966327314e-06	0.00519285785592558	0.00686576081278919	0.0851804810877539	0.11813873006915	0.00805256273693818	0.00745265359355263	0.0237239425337066	0.0172204124490719
SYT15	55.1998101822645	0.868499514260913	0.0116192133924753	0.0428084612185312	0.0184113525853072	0.01796719714678	0.0311596202344778	0.0590396772419384	0.0360279836063797	0.0318759574402034	0.038718950056439	0.0372146110418604
SYTL5	31.3173098689269	1.30766698555137	0.000297760662752662	0.00197412400182831	0.0102171578641829	0.0108069296758341	0.0409679213259451	0.104754190186116	0.028518737188458	0.00391023930097928	0.0217829810259827	0.0176185661589839
TADA2B	1653.92446149398	0.372029734407575	0.00264772466643154	0.0127803269498524	2.31509892579142	2.04928503932436	2.9198920271153	2.79145921134042	2.34249003308931	2.0334124395747	2.62830871490986	2.59031002286516
TAF1	3251.48480754601	0.536900163600911	8.05069392455751e-05	0.000630803980287795	1.76392901083284	1.72675379871265	2.3490215487894	2.79183804853649	1.75483970370382	1.85308106264828	2.02658913041968	2.02201381669556
TAF13	1380.24405618258	0.583877305513704	1.23236650545212e-05	0.000119140507407004	12.0359465400902	12.7810064221697	18.6430473991114	19.2775995174449	10.0695168748432	10.6719545379634	16.5645952968731	14.8527848057382
TAF1C	997.485140640025	0.440285793929392	0.00223415542076574	0.0110928605234423	1.42713562552755	1.19618399145075	1.82206562871279	1.78779267114954	1.44898268066802	1.39272217808139	1.77554400992003	1.84107888276641
TAOK2	3405.83124999778	0.356559166399666	0.00778560906698071	0.0309798065992686	3.33362953869729	2.60995916834373	3.79880472978489	3.88661296712863	3.14954893520045	2.70355828573501	3.43113349538044	3.46473989816378
TBC1D2	3757.48486202495	0.492335256415532	0.000328311034360733	0.00215313444768836	6.27185631195296	4.76587029162663	8.30049443097144	7.47926324193488	5.88797407482648	6.33000431079515	8.28246925729688	9.25198897420968
TBC1D22A	1577.67490948664	0.429492839019806	0.00145115548545365	0.00771800154965026	1.89406935668928	1.59039699407199	2.3369648476367	2.40945947700425	2.0698327426446	1.99628014599774	2.15650213231705	2.29012077952186
TBC1D4	1779.90057916109	0.464401779767129	0.000432631034499296	0.00272535386194829	1.5279220585494	1.49458189301148	2.3503735087942	1.90712201314048	0.777743351009279	0.840883392062085	1.08773501224805	1.07413166788951
TBCEL	1210.53046938272	0.460670399655402	0.000593858992127293	0.00357929717848558	1.57613585644039	1.69683946749735	2.37062298167664	2.22188853524681	2.09358606509485	1.93347924962438	1.86412831469467	1.8760550030414
TCEA2	657.578195849842	0.44783482619367	0.00407677917161853	0.0184040181228774	1.62993545445711	1.42644897467345	2.23573529534676	2.0186634281209	2.20668673879475	1.88270493104396	2.26995360688624	2.06963924189073
TCHP	1299.84386178931	0.338180290594014	0.00789465472540935	0.031339948682466	2.34228560109218	2.18215295240831	2.92020434639068	2.86211953096169	1.97035323399993	2.2179840108215	2.59833076107157	2.71110057633409
TDRP	310.018285737676	0.48349589832051	0.0137285865267163	0.0488629296773258	0.515956622120508	0.458637034417516	0.695988981975707	0.706498596912921	0.944743457054216	0.850654111092311	0.834558812811494	0.784933867571255
TEAD4	695.485066040778	0.47275188140241	0.00264678244510589	0.0127803269498524	1.87464090989605	1.62083503987557	2.66773362784759	2.29559679745724	2.69578169184801	2.25749188730088	2.65089533442866	2.93376062702584
TECPR1	2268.43351459927	0.345113934971213	0.0101444646149003	0.0384216981003997	2.52013730428262	2.02194056627718	2.88539056870368	2.93873144763532	2.52900719613335	2.35638507245212	2.68593743486998	2.94777401674367
TEK	15431.0349926786	0.401617913742427	0.000782396822873874	0.00456707683615414	17.8480200676911	18.4435906958364	22.7620822345659	25.7108940906421	24.7678255390205	20.7725512678541	26.7340986184639	25.5876419384988
TEP1	3769.75748675994	0.570480275264562	3.20727533930532e-07	4.32918153334376e-06	1.87357184882021	1.81900400578982	2.7200822258482	2.83482046679879	1.77098851150259	1.67029689106049	2.48516728093094	2.38065213461512
TEPSIN	633.008716919027	0.539404833044556	0.000653183735233843	0.00388604755324121	1.5706635300647	1.35271323992834	2.26629616221561	2.08177592385508	1.92482216903065	1.53200423085969	1.96667023046802	2.3149294286588
TET3	1196.85813450114	0.427605588246856	0.0124532319511953	0.0451797108744411	0.58009015166827	0.582178018739936	0.685948981286127	0.903469024729881	0.631856035307581	0.595263280044968	0.573138846081002	0.614879877528821
TFB1M	991.115043292849	0.472790308358397	0.00207561085488773	0.0104514656784648	1.79477176679556	2.04103301237302	2.61562140722016	2.81931628480012	1.67872654778877	1.94207854190019	2.29391982033223	2.22246753691357
TFE3	4794.65559804562	0.372440407651026	0.000267728744203408	0.00180420092942257	8.12471590847651	7.68196120482924	10.5079539925232	10.1527801577415	8.36196571796141	8.37666170359789	10.6203380716105	10.7043131678712
TG	434.212319541498	0.735451981433357	4.76530969783715e-05	0.000400067123918358	0.246707436574429	0.245029199820015	0.470087323745824	0.388499346603953	0.235215948175196	0.189739817172752	0.473669856655991	0.473650978945687
TGFB1	1778.08767212533	1.07336742418625	1.76325141059174e-13	6.21516858869131e-12	2.93044563224357	2.43540133429327	5.45713677702067	6.19366665773822	3.14145352422779	2.38932454862892	4.74260522892149	5.12089140947182
TGFB2	1324.15602491903	1.02577115907763	3.71396239336328e-08	6.03742083776904e-07	0.982185731972878	0.855846416887265	1.62050757845536	2.31389381636672	1.21124411567997	1.09556614516187	1.35020508000993	1.3105545562072
TGM2	9741.76022792854	1.17679343128592	1.02191370595595e-14	4.16306713043802e-13	7.48309830446666	6.53074168729974	14.2493505621076	18.6859927188087	6.80698092437403	6.38505925223445	8.79838965995667	8.72551740146126
TGS1	1636.97604138558	0.399454588894234	0.00222756652779275	0.0110642075976485	1.89521766058697	2.01361597349616	2.83005838412532	2.42537175863844	1.88506056265056	1.8295922998835	2.4520902133829	2.48714332570164
THAP5	1146.61888780622	0.895803923817232	1.60318856563487e-11	4.35404123498224e-10	1.34568409214892	1.38053570937017	2.64463025189806	2.57298671035656	2.88919160835614	2.73630992059336	2.60271184749341	2.26706525374069
TIAM1	820.213952521564	0.81744001059964	1.72772619595803e-08	2.98054806126688e-07	0.561422746584497	0.503106078881228	0.982823940686245	0.945270028661769	0.538481012004194	0.641938738346347	0.976350812960276	1.03891623919443
TIGAR	2020.28551822213	1.3690040215128	8.73911854501737e-24	8.32370269868732e-22	0.832214029170876	0.913454416937451	2.24533935796658	2.45081057759453	1.02714378325454	0.892586878519048	2.02756422481956	1.96965172355363
TIMP1	24222.0092909391	0.461287746998333	2.73354234775602e-05	0.000242911696802892	154.769114702235	135.389360978581	218.768443729391	186.099971707068	143.978285507919	140.64926929458	195.530183262002	192.884437393617
TIMP3	132744.906299564	0.691406747721071	5.82691892741826e-09	1.07662675537339e-07	117.883533317398	122.136984275688	221.492684776589	174.663371353135	101.293710686337	100.685673368538	202.942694401517	200.744090986024
TLDC1	3505.42008355558	0.596968248156286	1.47050726819777e-08	2.56627236159676e-07	3.67310622888853	3.545287281097	5.71679799928451	5.35976890902143	3.9828133755197	4.38726206991139	5.37011315302481	5.10377290324229
TLK1	2656.93868432954	0.399489798334918	0.00108269324731894	0.00604351059429988	2.48624814064191	2.46376295857077	3.16717960281886	3.43214946424104	3.51938909785555	3.32525369384438	2.97127336454802	2.93259141904322
TLK2	2844.79431318877	0.367891999872982	0.00123653708561852	0.00671923024627985	2.68004789590701	2.79081948805285	3.58894408240955	3.55470093117885	2.83253181893947	3.02090970288272	3.36729002498513	3.4476121504188
TM4SF1	14814.2914814342	0.40700164976096	0.000641430726893427	0.0038234246722052	45.2819385361417	52.6805188412074	66.9742866442616	64.8354055578554	45.0556171191056	54.0574107632994	51.4174155372118	53.5607761349407
TM6SF1	496.185901947791	0.711616010878588	0.000701244378056977	0.00413621029795927	1.00030840803619	1.38207765161446	1.87785600938371	2.24993346068327	1.96999590072821	1.41168948858926	1.93081676510511	1.83109177258468
TMBIM1	11814.0992469684	0.597123427104339	4.64106109215804e-06	4.87726117105186e-05	18.7669140850763	18.3147540980547	32.8692220911778	24.5385636544449	15.1436864528936	16.3448793388759	26.0637389070847	25.0969521376152
TMC7	86.6926476966892	0.867675999617787	0.0031547284997465	0.0148151746385664	0.0691321688463811	0.0698220522611233	0.150500270713265	0.148539672327707	0.0908249573942099	0.0808432192353735	0.131598024187405	0.15028886287395
TMED5	5357.80341875075	0.734443270733128	1.73841194736614e-10	4.13216548121741e-09	4.26871302755797	4.16680109803821	7.85660135927132	6.48015364410818	7.82155736595101	7.2207212299319	8.17247915019873	6.96340690593252
TMED9	10551.8830516649	0.566472811573359	5.39463565117882e-09	1.00085661429621e-07	21.7745334398439	20.8413020307155	33.4599229313352	30.4707854719612	25.3362183831429	22.5696178618967	29.1430916318638	29.3768438313122
TMEM100	163.546006778968	2.76230592453161	5.06983999903715e-24	4.93306374007032e-22	0.0961037506338791	0.0635320071693492	0.883408624212443	0.760480970947645	0.0712742848782637	0.0719611752764391	0.187712714903163	0.15242012048987
TMEM127	3867.607386994	0.379076381551477	0.000487838893124027	0.00300593213189179	4.80763836428616	4.74076187516409	6.21049255587662	6.33086086170656	4.07290575931271	4.05112327340768	5.34296191736013	5.63514770647539
TMEM136	1255.77392649591	0.442803582704116	0.000624958759262723	0.00373676711716549	1.55865513895164	1.54189146750905	2.26408363326912	2.02617559562484	1.60382388520839	1.60683186670978	2.02965718846528	1.88508057481189
TMEM147	2144.64902817847	0.363178973462325	0.00206535614971958	0.0104075789586279	12.7669797034358	12.5302000529276	17.5930099064017	15.4186965786468	13.0943860527478	12.8477267384505	16.689535703522	15.9210948941102
TMEM147-AS1	131.144424367788	0.668580715398762	0.0130281788949068	0.0467762462313814	0.331171557460783	0.433805733248268	0.659481210830911	0.688312401854641	0.513547610416375	0.404875598328533	0.45763003961224	0.630460785585521
TMEM173	3758.19977388091	0.481775716991365	4.3136801489556e-05	0.000365325760893078	9.64803578338178	8.87075584605041	12.5950842775949	13.5523291166835	11.8939480338916	10.5201347458655	15.2330526683989	15.8233594782733
TMEM175	534.381566023151	0.518379404276205	0.00566880882659592	0.0238983955307522	1.4060786735541	1.00792049758888	1.77151719331835	1.77286319390189	1.51380574636064	1.40609367186303	1.61884188599431	1.65726004136894
TMEM198	124.635048759935	1.43475870077478	1.38416543694626e-07	2.03266422743738e-06	0.166365755687058	0.127884445538721	0.497136605743544	0.478828778543476	0.170988941458806	0.188789961969906	0.391810707764171	0.461886316693331
TMEM198B	850.691055373916	0.374360430671345	0.0103274523228654	0.0389402823157945	1.33629863438193	1.41268126089817	1.80198553716325	1.82017711044165	1.48676877901841	1.56478911234086	1.8983133985914	1.78767648799335
TMEM2	5978.4203283046	0.891236387294248	1.54573934243046e-12	4.85060895739488e-11	4.05058197580659	4.24010436698146	7.35749506785059	8.375316951082	5.15094557379066	4.72000442158891	6.51555005126029	6.87346704212912
TMEM204	287.481469408674	1.21368950381723	3.85447405282227e-07	5.12099818903941e-06	0.684360211775441	0.417879499375577	1.34252911645298	1.50701846356933	0.53466908572553	0.37487627958145	0.855226391743559	1.02558645719204
TMEM208	944.776915085169	0.613711502814509	8.15667449696957e-06	8.19606408406489e-05	5.26058668821722	5.06160630196148	8.45252641000912	7.70730014385347	5.28426870404327	5.10455867227727	6.41376280017913	6.42711003073883
TMEM209	1235.13686742931	0.414779198470346	0.00288401580885077	0.013681625329606	1.82851695534386	2.04564636903748	2.63792326767554	2.62053552463639	1.80162072469637	1.90560171169027	2.33689696157139	2.16613223268989
TMEM231	207.270196481673	0.748361634382946	0.00174774689344231	0.00902568794723451	0.284175615022186	0.333507901676857	0.509208915942593	0.61018559569732	0.802120283661545	0.788187874355826	0.544595437311352	0.537895150099615
TMEM240	90.3274824886029	0.827091969646047	0.00707143310398102	0.0286608129251853	0.437713287500349	0.248024841036046	0.765213551902477	0.677420381461868	0.741097101609605	0.350421503479837	0.60535876551597	0.663557837482519
TMEM30A	33520.6018440097	0.633467940970966	1.26295754371166e-09	2.58810617859093e-08	36.1266092521763	39.0420208088384	59.8069938017805	58.5799763852172	38.6229081314284	39.1286356721438	55.3734752658939	49.3655593031754
TMEM41A	1080.03607016964	0.454093438635243	0.00131103261463775	0.00704478192807927	2.02596952121416	2.15131584160524	3.15537638675327	2.70123809303488	1.27254062151529	1.52641523258228	2.17957113395693	2.2402684508308
TMEM86B	140.288166760236	0.867445376854881	0.000696208114680369	0.00411368053781214	0.347608599988476	0.346577802673686	0.690674571881015	0.717353751978427	0.477179875583919	0.430725922909156	0.581426275225709	0.540460333579384
TMEM87A	4241.93724060259	0.40498170600486	0.000488309865954803	0.00300746399683002	4.38697900363728	4.74440332828994	6.05968115353887	6.18487307596616	4.65617157999151	4.51842615506892	5.5770183932211	5.25838232605254
TMEM87B	4669.37721230829	0.467319680545975	4.65985558877649e-05	0.00039194369924255	4.61514357469219	5.0333459034779	6.7664156533412	6.76313688861389	6.47880600853456	5.85566586488984	6.57672001060237	6.30344626599727
TMEM8A	3856.52247086778	0.499784147538842	0.000484932700612811	0.00299075001175936	6.56380570848939	4.80828375351871	8.49610062158046	7.85737009933017	6.86889438247275	5.90933256573044	7.70773275167397	8.81167186169041
TMEM9B	2756.91335581496	0.47675336418232	7.75711834247802e-05	0.000611036840897002	6.54349916876964	6.49868461392891	10.0782909743394	8.40314926313794	6.97900947495265	6.65122091148773	8.78450980360604	7.93963751872048
TMEM9B-AS1	191.472788469821	1.02234598290939	9.26657988172237e-06	9.18845255867266e-05	0.748592624162127	0.72665569354503	1.66662123146317	1.6326435917978	0.940429207158319	0.843169022374839	1.34202490307126	1.28208178428526
TMPPE	320.248207277962	0.528310873179339	0.00875239693330235	0.0340063684351951	0.477419922017273	0.373750423747072	0.636579840594492	0.630343162083942	0.471476432934332	0.649118433241513	0.552934842700892	0.564954854423686
TMUB2	1952.804689187	0.333691691766451	0.00522135802096952	0.0224471923819494	3.94208428221068	3.86670575598314	5.31135606788146	4.66867788194957	4.12720654212679	4.14259743875459	4.73037763113876	4.81357476422545
TNFAIP1	4936.81707682094	0.420421504363566	4.90527112701252e-05	0.000410035797236368	7.26154573328599	7.1937374317368	9.82112609321826	9.73173263212374	5.91053136783509	5.64188964801008	9.43266353070831	9.71387371563693
TNFRSF10D	8327.25620156642	1.02284307816993	0.000667656493690244	0.00396402725072895	7.98246109612881	9.65090766986949	17.1776982252204	26.7412559844002	8.71258984574616	8.94730171890197	13.1834888221888	13.9264067062469
TNFSF18	509.343988982745	2.9691446014343	7.02790765246998e-57	5.00276057892929e-54	0.880418503249501	0.864218463485223	8.01109328700746	8.13328298313766	0.320630333068067	0.216973846666839	1.81814047427687	2.2737643817832
TNFSF4	7987.17926741323	0.665181464861351	1.6629898674887e-08	2.87620689997247e-07	10.0316931158362	11.4805749334625	17.9343989979205	16.8689308705333	5.59555536176517	6.03539395301214	13.1294238528131	12.7946591112486
TNNT2	41.6293297983542	1.12796392938861	0.00142303520754337	0.00757738235512759	0.11186184271481	0.0640894141341807	0.25145112494496	0.386822226612517	0.202374803985775	0.171243932795353	0.482657227724708	0.509442349723743
TNRC6B	5196.38469427002	0.421016341722124	0.00579911159400536	0.0243075428979133	1.52166331807056	1.5634188475331	1.81471217034904	2.37668710355579	1.81090786126079	1.75872419515946	1.74303688933102	1.81489615902232
TNRC6C	1394.02618832269	0.563460575164936	0.000168734656484796	0.0012053117924671	0.757027880026531	0.73449372129511	1.02366165726847	1.21997010533261	0.719067298712438	0.753595871531615	0.875509903493334	0.914177288869625
TNS2	3730.61746843257	0.333088089436641	0.00490404771293132	0.0213958855862568	4.51019031926878	3.7859778087031	5.33442967612215	5.21044290558301	6.54008770140627	5.80817160767789	5.40409644577023	5.80060302472412
TOB1	1101.66805696613	0.507507127713263	0.000290209949199329	0.00193068842248939	2.23892499965884	2.44413382086091	3.39092230277782	3.40174796194269	3.51491485267803	3.47296025260535	3.86517717077578	3.41665840168063
TONSL-AS1	82.2641655170047	1.1760036266732	0.00017002865303654	0.00121352904080169	0.283657689452738	0.176489088986949	0.61583137528891	0.728840893092833	0.174653420181322	0.151663993155082	0.495495169331708	0.53119501036883
TOR4A	2419.26587279575	0.651239068634251	5.30840189168308e-06	5.51006412778308e-05	3.40858347370946	2.59052714721498	5.13982246720835	4.49506864084486	3.21894664699585	2.62074972130298	4.24785528553807	4.91984729052334
TP53INP1	5706.26462861953	2.16553382387788	2.26618130641711e-53	1.33261313779528e-50	2.08847564506378	2.47885670288118	10.2642329002178	11.6425680859348	3.379585568763	2.80223335302417	6.86498679934794	7.08381409240604
TP73-AS1	800.796645693221	0.417018877093875	0.00387723353466196	0.017680237207115	0.72497564951286	0.657073252931135	0.966353093771768	0.909186515664846	0.844962393943751	0.772030257202782	0.885110709915954	0.908346210798142
TPGS1	71.6684857982535	0.906047131402614	0.0102772462979524	0.0387942383979365	0.358279223345099	0.0888188469598817	0.750949286142577	0.502641058266383	0.763927254440278	0.154257887396891	0.443306569809039	0.849502732583036
TPRG1L	2776.11632196511	0.913056283458945	5.82390458998095e-10	1.28078552161776e-08	5.17199014159973	5.02806652107183	8.80078097260838	10.9645124896396	5.72188581412298	5.27495873454066	7.44420073930187	7.80121083084228
TRAF3IP1	805.790586675836	0.500319525654629	0.00629400114870452	0.0260007225217559	0.984427074833893	1.0772659856334	1.29558063503114	1.69310453102781	1.16714434367658	1.21164513991156	1.36996820524519	1.22974528142778
TRAF4	1895.87386584734	0.796305509951182	2.22589967109587e-11	5.87994004913508e-10	3.2457974133122	2.94582305043068	5.66511839140622	5.3035293019744	3.67630358948274	2.9870913583851	4.57897637875181	4.99870002520982
TRAF6	1792.95925500791	0.664749449804143	5.24047097459702e-08	8.29945783740336e-07	1.0922267863111	1.14885958635325	1.85351972849426	1.77240704397875	1.20566320432511	1.32710845499004	1.58468674901008	1.58824007861156
TRAK2	7234.27303970274	0.331014348370346	0.0108491724717353	0.0405345463205029	6.12565528040986	6.65590594607678	7.56195691451004	8.69339854667916	7.5646301153967	7.59710970152486	7.8536781443301	8.07175450555596
TRAPPC10	2319.65745715333	0.365797671234425	0.00114565575694723	0.00632110620807889	1.90140413539587	1.89019523068902	2.54040792730108	2.40434641520467	1.41541642317829	1.46716538245489	2.06265535836214	1.99417268744074
TRAPPC2	1677.78516093306	0.429169751036322	0.00084625608509851	0.00489128784228947	3.26904110448981	3.2289481053294	4.85172830749498	4.06384013118428	2.22627245159073	2.68379958030983	3.75097928186866	3.50558525308748
TRIB3	1990.7919878299	0.372295228731776	0.00796340924545875	0.0315665621467848	4.03685251137792	3.79508852898291	4.71186438127888	5.52923139255142	7.50871909176877	6.01183648859501	4.81329991647084	5.09344011371121
TRIM11	823.701703145894	0.4102403319563	0.00561362105868861	0.0237337370486913	1.82430827726467	1.59330427557662	2.45656740650226	2.16852660784411	1.68759765673145	1.45100756024394	1.8859873111885	2.16412782002116
TRIM35	1700.61182486617	0.549658909437013	5.14559717751033e-06	5.34928530559779e-05	2.11355943916413	2.12546790361921	3.29326266136462	3.02385212322328	2.32277885458202	2.15989000837997	3.01748358439357	3.01947108583078
TRIM4	1893.2703926345	0.480557101840316	5.50371945998263e-05	0.000452509457120152	3.08460486978083	2.87085047710678	4.21518369544729	4.19871264493658	2.92188216953859	3.03964170848131	3.84273841848981	3.76437867545367
TRIM66	891.124964870182	1.19169358880071	2.10757736285071e-11	5.58921251618742e-10	0.336592548526912	0.363191038590837	0.742134832304902	0.950561446915851	0.411693152680963	0.348475170120924	0.570228420032718	0.624935706792602
TRIML2	410.409869833155	3.2844682286455	5.59470910599382e-36	1.20108635965978e-33	0.192672042255888	0.192986533086226	3.91068871957082	2.06503735064793	0.149388231968368	0.128483050220504	2.00053637705605	2.16463002799046
TRMT2A	1092.40050671448	0.539237411224446	0.0013771337599562	0.00735904152643523	2.23193813543075	1.56661642896071	2.92232795392336	2.72503846762669	2.59579922450777	2.58455820246697	2.70664236247446	2.72766744859719
TROVE2	3430.30316581801	0.544425625438502	2.70256090405161e-07	3.70711320763671e-06	4.92737892755399	4.83467249436333	7.37799822554421	7.05284600077784	6.72214934619188	6.56121450565451	6.76271474259481	6.24975358199539
TRPA1	11760.1375140655	0.480774112920172	0.000258018060357936	0.00175009742544688	11.6276311920489	12.9332836678667	16.1449221043593	18.6548238706589	8.83958437796035	8.91775051641556	8.90484696801927	8.60059564175007
TRPM2	82.135929986354	1.28236921690288	0.000134638365766859	0.00098431561999825	0.0420469992907919	0.033141761868315	0.0869510478137676	0.184938618746856	0.0626944866249056	0.0402298347790703	0.0738825860267701	0.110475504688877
TRPV1	356.640698852597	0.875265154820726	1.55743214669651e-05	0.000147508892045311	0.334550732669507	0.309096524056924	0.56383680495418	0.680414658906407	0.464096222158244	0.512918986343907	0.487989183126926	0.530654087691133
TSC22D1	4896.23196654441	0.41974253443088	0.000361678905861134	0.00233829216145882	3.94855146034543	4.09689289386962	5.23183728690491	5.65522364322415	5.0435587685618	4.57065968677649	4.94627930982239	4.83841547598997
TSC22D3	1747.03782604613	1.21745005068646	8.77898295423614e-18	4.86621903508376e-16	2.03011394233329	2.41658917233301	5.37177196303896	5.42051520683841	2.47166760744094	2.04076598068425	3.88972493300734	4.11852727121737
TSC22D4	1303.84439888303	0.561316250629239	0.000477290569536293	0.00295352240781673	3.33719129963001	2.39713731471604	4.44538986776213	4.20031224182835	4.64579563510433	2.99265480161379	4.51774599627632	5.17094082533784
TSEN54	365.967168769995	0.704692230299193	0.000192957729938912	0.00135946177287115	1.00243425666223	0.836004537052166	1.56937685692913	1.54376461706744	1.21567871875403	0.993541241202919	1.75359169664912	1.83089181800297
TSPAN4	7065.84320932266	0.62340101121291	0.000392894441878956	0.00250065756537077	24.4716550976661	16.0733075423314	37.2043075994376	27.4199792255362	32.7817781759041	30.0914530985249	35.0090198962699	39.4712780511925
TSPYL5	1464.72608860781	0.462568776355443	0.000187601893713835	0.00132566123954003	1.80200079640371	1.78689270857554	2.62623752700779	2.40211111906885	1.82361587077931	1.74765311225174	2.26242450384081	2.35915907823162
TSSC4	1161.73020158416	0.436431830914955	0.00906522950711927	0.035040648494938	2.95014355074796	2.15238732778652	3.88253344612587	3.17726710283022	3.21712778899382	2.68968136544583	3.18052821784057	3.64203089107785
TST	701.612585547143	0.869144162869284	6.08626833390275e-07	7.7438174238979e-06	3.15958069702251	2.33345528676769	5.13884876035989	5.26737072583052	3.93166375631007	3.4184145298848	4.81159013440201	4.61933032258867
TSTD2	1623.75530437198	0.491748317643092	6.27822950508852e-05	0.000507246440001925	2.02806430287825	1.93955649741535	2.81743867222076	2.83737373789671	2.15077485739633	2.20776279029384	2.60116313825023	2.69016443259282
TTC12	419.931579669328	0.55376303706488	0.00305217029459134	0.0144085875163518	0.881047463460424	0.99241070510562	1.36414733160789	1.48027474309817	1.35297550664443	1.39131107849803	1.48174223376377	1.47503572317734
TTC14	2689.32863907381	0.48507405339567	9.9296491524049e-05	0.000752372575833481	2.47241301543868	2.59151840203405	3.45866425778309	3.72882782526409	2.38480458353374	2.38380927490024	2.97038806984256	2.68046955677493
TTL	5113.30674923132	0.490574391384362	6.07813294414634e-06	6.23723429966458e-05	5.26443541203149	5.45282234425462	8.1085119704757	7.18133831852652	4.12223717524913	4.52102390556238	5.70812738359701	5.52701394964497
TUSC2	761.231268175694	0.571300971968486	0.000191290326498903	0.00134960963270614	2.39379029307901	2.30321405232879	3.92554803497482	3.25857064210556	2.13167211245499	2.02955583889314	2.774655253443	3.01809611591981
TVP23C	690.241885983188	0.47078640308903	0.0102285159847844	0.0386810562001596	0.674038646252216	0.762964607435184	0.906501630575247	1.13414408636096	0.751911532525836	0.863552569105126	0.84661395560564	0.880081391914401
TXLNB	72.0318200299796	0.857056077585294	0.00762999504836379	0.0304861692848214	0.0511150123551471	0.0718058195827637	0.120334474723436	0.158926725514497	0.163482063031339	0.0794721709456341	0.0989227637954304	0.101703719167735
TXNIP	13042.6529997357	3.68400052827212	8.36773421850905e-120	3.77245351017783e-116	2.87040553114221	3.85878255229361	46.5068719484128	53.2728095336194	4.51135237968198	2.57990820420296	42.3355268651048	46.8809226924265
UACA	15441.0767179593	0.882099449587807	3.78843925805438e-08	6.15109735476416e-07	9.10970067945022	10.0243104900842	15.4263235344768	21.0757174616469	8.38316107711658	8.82906080768901	10.2120767465782	10.0561102593787
UBA6-AS1	487.350238590617	0.720235638537285	0.000135728336308503	0.000990677684065034	0.910662865224302	1.12914482216061	1.93772575623819	1.6124853286172	1.22635343789229	1.10476639831238	1.58255531375202	1.53452148109987
UBAC2	2233.86525868437	0.333209277070088	0.00326275559297454	0.0152178729637325	3.99605233066551	3.7932094685863	5.1575610742341	4.76723494071218	4.37178823444261	4.14629091703541	4.51587503163806	4.46317047956213
UBALD1	208.57364218073	0.610028112439022	0.0115209344860793	0.0425506933162813	0.882703146687987	0.602208125558705	1.17121654410009	1.2209675376446	1.14979824939689	1.00670951079108	1.30121543406477	1.2926497120688
UBE2B	1988.67744150604	0.42150863413148	0.00234184490002229	0.0115512225648437	4.15563772895468	4.23975001275704	5.2852726048657	6.10398867590815	4.78464613859425	4.57045440716131	5.44292225871057	4.77115062772766
UBE2W	2160.6869260321	0.47109354389194	0.000154455776321198	0.00111295384909121	1.2307904501486	1.35656324394346	1.9020493060057	1.7504852743769	1.7144927700396	1.84255871372799	1.95206631961263	1.72945485226932
UBLCP1	1235.72067907138	0.481073640148069	0.000472111021515541	0.00293097523871775	2.67077355876296	2.89238365936659	3.9002464170879	4.00542735567716	3.0997446642273	3.19021895248799	3.29355323277871	3.08885887705414
UBXN2B	202.193401439774	1.0506552291543	1.49020276466257e-05	0.000141736936653033	0.135117829349557	0.165000037656197	0.319803283542226	0.37627574360535	0.149870126744381	0.172371173278301	0.242917197929532	0.250174667169427
UBXN8	369.029448977761	0.482815352220834	0.00839421573005025	0.0328601353831924	1.35751453378572	1.38029886006134	2.06602374389691	1.88751587066822	1.99289666385945	2.22188411490048	1.94137379880886	1.80527125631937
UCP3	79.5268574524579	1.23441309056843	7.6026766719017e-05	0.000600971373392581	0.0601261416853318	0.0832815801546735	0.21134413912354	0.243179338313933	0.0421789077017945	0.0493094079082171	0.163506296910033	0.17470244315191
UHRF1BP1	1560.59052301929	0.477446029941989	0.00299052119317593	0.014147184028578	0.835908609023143	0.917576538896384	1.1063028308284	1.38186331721233	1.29624316768551	1.13376887219163	1.21697138755064	1.08338811409626
ULBP1	1350.24222140348	0.742409049218959	2.68895103361461e-06	2.97124695503575e-05	1.37126900182062	1.49968444812482	2.23809549728572	2.7050506406061	1.64610012427781	1.4533316693663	2.3400450904571	2.32924493485552
ULK1	1292.09878242125	0.765767392988729	1.58818110929048e-05	0.000149583213810263	1.3127036511491	1.04085302059193	1.79178740529398	2.33813966726831	2.05783186770855	1.50826323899009	1.71535076047082	1.92501820027708
UNC13D	45.9910907625446	1.06041905667086	0.00183899651947818	0.00941168974296112	0.0363500049914791	0.0315395887337503	0.111799381427677	0.0957908202977359	0.0704599239482091	0.0565159564177741	0.0726545740094764	0.0934207375362151
UNC50	1496.20757634176	0.337287971963509	0.00724981126900343	0.0292348531345472	6.52999493337754	6.62653786465275	8.9122683245741	7.96479395869047	8.15053250537416	8.29145317415542	7.85897766281011	7.7865452078979
UNC5B	705.544771010743	0.935577177025188	2.46387044029646e-05	0.000221863167143872	0.427218073903846	0.449006557288259	0.683625903115963	1.11579887249694	0.953307431413184	0.787026179375565	0.59325178764495	0.601269320698932
UNK	1158.06072447929	0.481842890070465	0.000679599967806595	0.00402610142995365	1.30931348999932	1.18327713167551	1.68883177912434	1.8394263497648	1.45222302638041	1.47413192633351	1.65505535450249	1.67117600363195
UNKL	802.465589771652	0.512943485003482	0.00116726383940933	0.00640196408272961	0.761526788570688	0.613190160994475	0.986410414311651	1.00971187859437	1.34305633915552	0.998982305869594	0.869164593030394	0.904256807450928
UPF3A	1461.00002708813	0.424317861284513	0.00364549436888829	0.0167477280364178	3.36645074517167	3.43083952590152	4.26830608501754	4.9789830208125	3.6510052830478	3.79313205874568	4.17453641823387	4.102151241274
USP14	3764.92606209105	0.37745515918432	0.00180290795810038	0.00926104448663414	4.90980899349838	5.34876385755291	6.592218065684	6.89968501940731	4.25917016315846	4.56898054978226	5.39472948797739	5.39647244096737
UTP14C	1762.84799461645	0.408796316933815	0.00123956332953397	0.00672486724105373	1.73429759300502	1.83011268966558	2.36658537465245	2.43056815587087	1.649725644199	1.73877323170814	1.99386993261073	1.86241703897658
UTP4	292.699010881742	0.53029319638215	0.0113708912774975	0.042100001239571	0.351412972419552	0.432403939261244	0.621784665996739	0.568773297495028	0.381852938999117	0.454027535184594	0.45898052960375	0.493358176404041
VAPB	3195.20597809143	0.711541070378161	7.97623050674868e-09	1.44415686216567e-07	1.88298795697924	2.06912779733046	3.23605079441076	3.36797267538354	1.75040984763492	1.78477252355227	2.8675217206945	2.78534704566135
VASH1	563.083786894106	0.859692862111835	2.84505570780564e-05	0.000251334934344032	0.42195845346452	0.416779861697849	0.663503681043416	0.941142495140431	0.390032486476295	0.394223128371789	0.538005313212461	0.598126609415787
VAT1	11508.5846021913	0.579367978786774	1.24182586655652e-09	2.5525372105132e-08	22.333091164976	21.274078295646	34.0575993323771	31.9045094611356	25.5742085948562	24.5975021008849	33.9990891316207	34.056018610516
VAT1L	9345.05212847579	0.730336510014127	6.58685398542629e-10	1.43457649199502e-08	11.6941686395741	12.3277873069865	22.4627006528733	18.3071902089268	9.90582149795248	8.33555025812673	17.4758658509043	18.0868036053262
VCPIP1	4640.76147035144	0.361984337573675	0.00052203744702562	0.00318473453812427	3.2768022326177	3.20535949750794	4.20952383902955	4.20097278278978	3.00622057075635	3.1153368160364	3.51723189548042	3.25952773218275
VCPKMT	387.6037961265	0.498760990689466	0.0083481281260446	0.0327270820013777	1.0183864301645	1.16507531469927	1.56759562776012	1.62299749554354	1.1332683251799	1.07029721930633	1.39818203255103	1.20737311155025
VGLL4	2858.8910678006	0.75217842407148	1.03133173430671e-10	2.51329039756724e-09	2.75041729232316	2.66149813303221	4.52336620221127	4.74805430704969	3.29573673401352	3.06142111921935	3.60692287516001	3.96964624134738
VLDLR	1699.24831761536	0.444310768541478	0.00262942240553087	0.0127146721611745	1.68603566201659	1.85641552742587	2.26592518337544	2.633522671143	4.4822693778235	3.53593714996678	3.07765177052003	3.30701969818129
VN1R1	44.5159566238909	0.930261750041854	0.00692581111368845	0.0281888640724154	0.0955754441586304	0.105304592926041	0.238067478033734	0.30537730125844	0.118567044436986	0.13411921045562	0.174657301067116	0.207070511305708
VPS13C	15887.587697869	0.326460891614637	0.00161841069940201	0.00843832101365156	5.37182061191776	5.4104881386915	6.68132307838297	6.95801888300331	5.87685572110035	5.79548195984127	6.51368541749185	6.84239326262856
VPS18	2288.41102575402	0.371842255269606	0.00672070699753058	0.0274669781027629	3.71455988106122	2.96366867177217	4.72276561962161	4.04468491554668	3.56534451113645	3.59324287686721	4.16648466905061	4.26971571732995
VPS4B	3323.9850817035	0.560833355286433	1.42562833434294e-07	2.08000250506886e-06	5.29623769440459	5.05558559668354	8.04050913431725	7.44761662683747	7.56702037951218	7.6589584004008	8.09240324509102	7.75799462301546
VPS53	2921.26489917231	0.369405894123274	0.00254978408989318	0.0123960567274641	1.22615980586819	1.20766746629206	1.51561371120644	1.65953934070673	1.12293975139769	1.27664201659469	1.39989329715061	1.45829174317632
VTI1A	2114.50381228344	0.348464129443262	0.00431454774413428	0.0193098141096678	1.85224582485693	1.94099324427421	2.41379804976924	2.47244040471991	1.80788761570253	1.92759986489432	2.14406940856854	2.19902941968549
VWA2	138.662337471427	1.34484345657519	2.38947877144566e-07	3.31803905377849e-06	0.0717964612080269	0.0755093342701725	0.237920297134724	0.210855319153281	0.0607280430378808	0.0343468002573181	0.0944263348042329	0.0768379590836732
VWA5A	1864.50812463601	0.592009988484736	0.00224142241642841	0.0111207770294183	2.35921480251095	2.34512705342193	2.86062348875893	4.45425479389404	8.60246879174192	6.56698950118865	3.66205461686395	3.73964692395876
VWCE	40.0314434387105	1.01406631744777	0.00411228703162833	0.0185519286533599	0.0451496668333077	0.0261164920283996	0.0925759583767642	0.132675540434842	0.0765773438158845	0.0566979169457464	0.0794996962860641	0.153467185900063
WDR19	2464.81308403815	0.570695398497743	1.14393850653011e-06	1.36555766114914e-05	2.76604639199375	2.93330137141223	4.36344081336711	4.24610512176559	3.64745149405154	3.26324825141852	4.20557006111541	4.38649165807927
WDR27	808.994026555361	0.410578244505411	0.00813552920754677	0.0320796013213032	1.33892895612962	1.17895644988018	1.61760508116905	1.77204345711958	1.30090361589813	1.34219345014954	1.64981130991293	1.46468668731119
WDR31	104.958334056265	0.943961803172549	0.000702067041137411	0.00413925751150108	0.086242670134055	0.0848566634888003	0.195568391980824	0.1873825112415	0.107300196144004	0.076758586961535	0.236708915064327	0.182239038607524
WDR37	1641.28470408832	0.976729742978478	1.91766021904349e-13	6.68462743880496e-12	1.58619171097984	1.50637226741146	2.98367680477253	3.26039682306091	1.32381223670918	1.42654069302795	2.04151317002034	2.10833979974799
WDR45	2256.5181508211	0.775132481577872	3.86306505857771e-11	9.89544600705747e-10	5.48064097209819	5.04856724424002	9.74505216311739	8.65049701217237	5.53254072496906	4.9410766135584	7.8459041593269	7.52169975352952
WDR60	1220.16948068909	0.406126621503525	0.00725668373902373	0.0292473701639886	1.72738172579935	1.88515098556639	2.26843276540477	2.59421188141927	1.96489041999836	1.8248351833666	2.05046374951089	2.12990844858762
WDR63	81.3973810392673	0.95280793327362	0.00270968935458991	0.0130236490834501	0.105762982393227	0.100506414786622	0.192763513345987	0.305779347675835	0.21269608178523	0.170761795190596	0.249142652217798	0.337575983320127
WFDC10B	57.831205854965	0.885252345401161	0.00901083113076623	0.0348902064253116	0.252609528358507	0.417486057018178	1.06468862397581	0.675263783665189	0.391721501241183	0.287009708565629	0.853527016369915	0.774869514729742
WHAMM	909.714314649531	0.410760170120213	0.00306051900160551	0.0144379209964125	1.31004323905072	1.32302133076954	1.83559074339896	1.72697059350109	1.31082881970219	1.53086477388809	1.70324857376919	1.63985555305924
WHRN	58.0883037530211	0.929181703352593	0.00623834269602805	0.0258023195607888	0.0647304329635625	0.0380371727105462	0.104869001704385	0.157808023875215	0.0724948309300867	0.0596391351722403	0.102226137770181	0.133564531079044
WNT2	2304.55884285905	0.771527284607249	2.84749324754988e-09	5.50963464565267e-08	3.91983598717711	3.66686893589052	6.23717736983101	6.96550341542696	7.38520348379758	5.2873846913928	6.42149467127719	6.51991472307078
WNT2B	249.590946872893	0.562647909753109	0.0123845144786555	0.0450341244544954	0.363899778533155	0.352585106506221	0.491103890057583	0.612589440478333	0.493223390795813	0.550166424120704	0.475907108628729	0.536130598751641
WWP2	1948.96769444316	0.483084095805864	0.000104919802148407	0.000789619728005804	1.68791477217994	1.45127932929824	2.33088588283581	2.12116802486059	1.4280121665892	1.43945821951782	1.92277102477215	1.91518968008245
WWTR1	1980.62314589906	0.562496122664231	0.000471986647716173	0.00293097523871775	1.91864632271402	1.93451541814728	2.51934326840825	3.28951449675418	2.74460505546365	3.02396939271093	2.29329234324569	1.95685778798789
XIRP1	312.931078133661	1.96131941949683	6.72927337838753e-22	5.5495989294324e-20	0.12352926487355	0.110244228984187	0.524867703626108	0.513820109566028	0.0478891962210669	0.0517084066646444	0.318623892545604	0.346149477315425
XIST	42426.6984067683	0.489118794868605	0.000113872573600089	0.000850571983349444	11.716994243799	12.0796082675946	15.5142517134073	18.3430187503236	10.776927960943	10.4653868760042	13.0518601859964	13.9602036820247
XPNPEP3	1901.1252537685	0.571635092698395	6.54192041171234e-05	0.000526663533145294	1.00543432904195	1.12553593776577	1.51827628036803	1.71358491940256	1.09855130129272	1.10175717510835	1.37327569914828	1.40777066425411
YBX3	6912.24416828521	0.392614367723901	0.00116891626801704	0.0064084282630444	20.0875762386119	19.3477504904443	29.379563484964	23.2339418682995	22.1160423111468	21.8987504656169	29.9323594844755	30.0315566101467
YIF1B	1874.49320448747	0.513356220119037	0.00281564922259744	0.01343742263078	3.83980174678283	2.92721084287339	5.84947088762451	4.10841600858303	3.72148695877675	3.34075043316435	4.66098922497147	4.94990255597079
YIPF1	1650.35883321727	0.3536336450792	0.00417937095844249	0.0188106463270998	4.89029680433412	4.93346752628856	6.75819496884375	5.98879556788948	4.95619508796949	4.6640336456426	5.62696701672321	5.61134673583455
YTHDF1	2076.29843349905	0.32906433817784	0.00397491164315461	0.0180344448083415	3.78626883172776	3.59833954162789	4.79815992223186	4.57636963035525	3.39720833318114	3.27916070602147	4.0674688531262	3.83189602748088
ZBTB20	11706.0592019969	0.551279530986362	1.30805288029437e-07	1.92927101482894e-06	2.16041283374848	2.20590478270698	3.18763023927905	3.29130587938716	3.61657858368569	3.19801915508213	3.32756951807015	3.30656479641519
ZBTB34	1370.25274387401	0.415294463041031	0.00123110256045278	0.00669238831596619	1.13266294313118	1.19301904692261	1.62380240276855	1.52972896768561	1.45818224385921	1.38046014649102	1.45168080388696	1.40059888104582
ZBTB37	580.204170308151	0.471968250566031	0.00362317934526785	0.0166678573621591	1.15765619046816	1.25438280904309	1.79205431835897	1.64649535088368	1.42068645119761	1.3533566555831	1.56738656330284	1.62457820905492
ZBTB4	3896.32813533442	0.362094048482235	0.00170544965952008	0.0088376270670533	3.72382071340597	3.55499760057632	4.55543456846081	4.88424129409315	6.19476918925366	5.17485464272226	4.88150296566418	5.11169094637204
ZBTB44	3290.67142437195	0.418717386183526	0.000104816969122864	0.000789337142197512	1.90958477357167	1.93050060933154	2.65074223795584	2.54532829787117	2.56291282728464	2.42741903166458	2.74425966755679	2.55239378491172
ZBTB46	886.429744437373	0.480297523828567	0.00242651692973645	0.0118951219553046	1.03155729337992	0.807990691432964	1.28932125668629	1.31872893612981	1.40892110949479	0.988800362184364	1.34877957616544	1.49985020866721
ZBTB5	688.246348247945	0.618759352855655	8.68219056427895e-05	0.000672161576312952	0.744760701321977	0.763346629184194	1.14616209608195	1.22787332815764	0.735541588531922	0.796768662141595	1.01976721449038	1.0135248025328
ZC3H18	1266.62308511717	0.381329822674718	0.00879288662615828	0.0341440687966669	2.07756209760394	1.69985728538262	2.41507067736846	2.55745006281467	2.09144120559363	2.03300896181964	2.15388450285439	2.35342297582125
ZC3H4	1786.01415141325	0.434587372898479	0.00176983852443238	0.00911540976502209	1.68530949809946	1.54876678392316	2.05916083277028	2.36257912003109	1.72034655384862	1.81696084546907	2.05467922735087	2.12297783472824
ZC3H7A	3866.93521173911	0.372267911226446	0.00353492417886287	0.0163062242561802	5.34988056953601	6.13647613683166	7.39641582007061	7.68100129354686	5.94023689021859	6.02932565528082	6.77929842526428	6.37154448332055
ZCCHC3	1147.89927117352	0.344480970829022	0.00906823450190023	0.0350422490394859	2.48275676094685	2.301639852105	3.08047779347623	3.06184478902157	1.86888239629158	1.83526663194439	2.03649652838376	2.1003188034661
ZDBF2	1971.64650611281	0.369758329981533	0.00231205527421255	0.0114126086071988	1.03627618465927	1.095717094531	1.40744831937624	1.38413472879974	1.19453616673114	1.09781950481065	1.38499665132255	1.29647231504988
ZDHHC1	203.211652110347	0.768825396680923	0.00130383597954136	0.00701726288233066	0.516269238343232	0.372320585186484	0.786977897236906	0.834268372023412	0.858802407001483	0.619692002333512	0.689715602591237	0.893372480103096
ZDHHC11	19.7360019234843	1.04263115892576	0.00344699446232326	0.0159659589393569	0.0191444289527264	0.00759356834330838	0.0558281894466169	0.114982621708669	0.0148436294119596	0.0183170553594415	0.040815923388286	0.0406311865183628
ZDHHC20	3767.38247879688	2.00537618741521	4.4707467281313e-76	7.55835618724698e-73	1.70976169852177	1.71609568583512	7.46327430195948	6.84411359798554	6.96215707044837	7.18107676155509	7.15411628729996	6.59173616056295
ZFAND3	3289.17379490844	0.363124732022762	0.0102654621394629	0.0387713977761059	5.83775845238943	5.40883060981841	6.58309284947857	8.02855709910278	6.13488406050519	6.09245375393223	6.61740513273504	6.43513483289589
ZFC3H1	6068.3190239244	0.413454663164349	0.00158911211089506	0.00831119153126668	4.64323565017274	4.81816014484872	5.86674909393454	6.88920094159936	4.7774723240916	4.39187084153135	5.69819444731465	5.715208473424
ZFHX2	25.1670756878362	1.13052926644954	0.00174340164007662	0.00901012884296382	0.00326009901007221	0.00718392474503072	0.021786795887017	0.0392266387998501	0.00758315147523635	0.0103973527045752	0.0148939955059411	0.0209013646940941
ZFP69B	307.198034675378	0.628884531543986	0.00734139647760823	0.0295425133471143	0.677978601222166	0.821693138515246	1.02525886043868	1.43064780590682	0.563762652943366	0.521762810005338	0.650901581377153	0.681004993290631
ZFPM2	2487.66726458964	0.525671434944485	2.58961558665536e-05	0.000231185153858177	2.90656019264735	3.00955261352979	4.15680747708239	4.4860229275508	2.96853636105211	2.90028165932969	3.74791956207303	3.90420921976414
ZFYVE1	2029.71648758079	0.368107815614669	0.00580313525467453	0.0243145614372593	2.59688360215294	2.47233832106986	3.09884889204539	3.50825208347837	2.86404979344504	2.59359213860787	3.1227322653267	3.08017628996319
ZGLP1	160.18358330599	0.769417552741344	0.00176748759652996	0.00910676942593057	0.352760275712763	0.386448709748948	0.739381632997452	0.646616229206666	0.464971443581863	0.361623077778065	0.748247755707984	0.588249289260297
ZKSCAN8	2418.4024856891	0.455137964225361	0.000356272052868766	0.00230879233024286	1.74500925812598	1.7639489537204	2.31502306700367	2.55660332443287	1.79478610507547	1.75793271776654	2.1773404823579	2.19135496139679
ZMAT3	11110.6135931925	1.87586296463892	4.22973286668698e-44	1.43017842554854e-41	3.13224451338936	3.43565281326658	11.6281660775238	13.7563731592128	7.91645772782111	6.84641285054161	12.1816568588412	11.612017734345
ZMYM6	1611.21392141397	0.382608305288526	0.00210132905946891	0.010557383183253	1.7263779100784	1.81064287279408	2.43588190877337	2.24826500858553	1.94164483816519	1.991401486943	2.11503744130497	2.03654442653855
ZNF10	415.793964258417	0.4438869009115	0.0126078974484748	0.045630669786091	0.503096287571143	0.530339090191704	0.724880477174046	0.719042271299732	0.541185985021602	0.511709385370987	0.581510039744125	0.628263066715091
ZNF12	2411.24869958772	0.584647689038778	3.3206159971262e-07	4.46434705379044e-06	2.4501677060668	2.50064416159671	3.95192334718669	3.60491116157577	3.0842070906199	2.87989703869055	3.34702321019667	3.12587328516207
ZNF134	1811.62821882837	0.363489779688848	0.0028628395874533	0.0136004342352096	2.03399249084051	2.14045270455915	2.82546156004873	2.62478621630932	2.07977156569914	1.8726511996938	2.51304985881569	2.32159012261965
ZNF140	865.226114478278	0.358314726375137	0.0121335289011805	0.0443290055074194	1.43176539631009	1.48513871372046	1.9127617246153	1.88587581087771	1.64801175965965	1.44614994606821	1.7353081314899	1.8384965767525
ZNF211	953.722551476782	0.384438051747141	0.0058865431307404	0.0245954574739771	1.24461766914223	1.286965373508	1.68420896028822	1.6725641545645	1.15437533014626	1.23351853143897	1.51987613719854	1.53880697814267
ZNF213-AS1	208.461572944007	0.969853996516904	3.46560802300995e-05	0.000299193859370752	0.69181329499783	0.844323801713563	1.60845355988216	1.7137928768042	0.983395066560364	0.840122734294001	1.14808065901451	1.1882635643058
ZNF219	466.049859707187	1.15246695238316	1.17395156742299e-08	2.07280612916396e-07	0.61681610683859	0.424832275157773	1.18695498150588	1.28970400799274	0.834153930007909	0.48036188019973	1.18616813681881	1.41755731903763
ZNF221	503.088947497641	0.654112503383416	8.15178217741438e-05	0.000636196502882455	1.031094954443	1.01708299700417	1.66840942905171	1.65496500053518	1.05440495630064	1.02537355690887	1.24256803244941	1.332714902184
ZNF227	1073.38308296549	0.453589706685835	0.00109411109621225	0.00609591871594591	1.81101290418552	1.93995849576332	2.61043531754576	2.61929052607344	1.98903308373453	2.08294892800166	2.29503036325655	2.26504122264222
ZNF229	952.442225844412	0.501137994671502	0.000264614455415628	0.00178677509211002	0.929125241698396	0.939400797278076	1.37300064387609	1.3224260059597	0.973242333123006	1.00924332986752	1.08338868318489	1.13337604983007
ZNF234	1109.67923553457	0.375491187593272	0.00517343813782795	0.0222978810752463	1.3318562807128	1.39812450181849	1.85023115420135	1.75023042244098	1.47834417215701	1.43825359403593	1.557506482266	1.39980951794903
ZNF266	1758.31983363546	0.354071596462061	0.00467026065078289	0.0205377679540548	2.50097823053233	2.69863333179746	3.48228150976129	3.26496417021548	2.44595185708333	2.37558833051803	2.82893271715466	2.86851495080128
ZNF271P	3204.29577451115	0.623421685799248	6.49217971198047e-08	1.00811401382934e-06	3.06688829608767	3.30970325467188	5.10618740839256	4.89615542765998	3.17657601503197	2.84136845716886	4.49432970691977	4.45096979994698
ZNF276	1096.27294471294	0.364468240798452	0.00852109343422872	0.0332893670415781	1.29366697856326	1.10317527793894	1.61316458178153	1.51219613707098	1.27161108546854	1.30001207707558	1.33766590017513	1.44693078917593
ZNF281	4248.0189188638	0.603848290194677	2.93214350071768e-08	4.87189690997624e-07	4.43402044015539	4.53241304600839	6.87647739977983	6.94844464863719	4.57228711392507	4.59966806561783	5.93668738464602	5.91677736038194
ZNF304	978.238302609779	0.416084625445151	0.00257122886353928	0.0124823655345904	1.06666313011693	1.10508076361094	1.49253140428498	1.4548028275101	1.17112150657771	1.07768581519564	1.2894996608602	1.19183834608557
ZNF362	787.704404612093	0.51563847892145	0.00179193008140836	0.00921165121666591	1.43599489293689	1.27210931771778	1.8121626286017	2.12824982401405	1.64145308082077	1.43848211544222	1.63154998770503	1.87710423959469
ZNF37BP	1867.00215692584	0.32959543317623	0.0116498908453239	0.0428981142616406	1.18541196546334	1.28715283419516	1.5342899498959	1.61132928812622	1.57447358569642	1.44210900107859	1.54097177661539	1.6081143406044
ZNF394	905.095714224577	0.437835002355534	0.00202815452335573	0.0102468397192328	1.87560663992815	1.89605619238815	2.77192556090427	2.44632692245165	1.97801579541264	1.80176920477198	2.21835910909072	2.33024810642588
ZNF396	106.046975523674	0.691657474925978	0.0138962313808959	0.0492893828928582	0.11067622298675	0.131697967900386	0.239820741953315	0.204416985072178	0.188788135396062	0.164722565376846	0.262179680428576	0.199007184991313
ZNF408	380.506040307929	0.577899395809811	0.00452446196194066	0.0200312298951204	0.907812383421502	0.63910390170077	1.22481748475473	1.16705524411966	1.04819057874462	0.936260521497396	1.12213360522147	1.04258440396665
ZNF414	136.197733722877	0.710492449429409	0.0133658560451018	0.047773045192918	0.518757500630964	0.296366867177217	0.67117899932833	0.808159906276378	0.680295540425757	0.53923153677407	0.721722531623935	0.781563561469072
ZNF417	1075.67548456916	0.464732569327055	0.00136367087136156	0.00729863416508315	1.22474583604864	1.26770718396749	1.66644151950087	1.82926922837155	1.26833249722326	1.25696465004701	1.50209358829191	1.36319183883053
ZNF425	126.383294114943	1.04038951361808	0.000131383487707568	0.000963122857043282	0.155035369331277	0.149635928578237	0.330603764346108	0.394093622365355	0.274071149796309	0.284803458148144	0.318730578159303	0.302304929184032
ZNF426	2595.15541398911	0.378567337929233	0.00101291264157184	0.00570105845911738	1.95152230152904	2.05571455490007	2.72716079747721	2.5544609748952	2.27072384693845	2.08072355521533	2.41543758077658	2.24835665847084
ZNF429	193.638499564566	0.767729336838535	0.00684348825481374	0.0278873692818185	0.35922765415658	0.377169741473856	0.492971661831033	0.911475578978495	0.593098871902549	0.52161946365141	0.543834455228674	0.543775550110376
ZNF431	804.76829375526	0.398436689206758	0.0116709704554874	0.042940662516449	0.416965290492637	0.458342078341531	0.561133662403766	0.613284668728362	0.393215677035519	0.423067372159714	0.491000882081534	0.475915970174147
ZNF436	1380.34895477155	0.374635936344841	0.00492198330733587	0.0214602914995866	1.65817638058347	1.59631613035596	2.05697856497969	2.20810562868159	1.75332802609453	1.47942449999841	1.775507202113	1.71012646514289
ZNF436-AS1	141.247928131576	0.780234069973474	0.00249757695092238	0.0121860491562862	0.247102693505906	0.200166143696263	0.456712366683276	0.391667594029255	0.302228099318276	0.352970359558471	0.384252154335832	0.369322888269457
ZNF44	725.900486373283	0.755711024233041	1.39870917881687e-06	1.65074534410979e-05	1.16779920295013	1.3126454952374	2.18701037627456	2.14924878329037	1.2654188761015	1.22667103863615	1.84637271759802	1.84985873935694
ZNF441	889.528116152499	0.399442575624388	0.00395181272429457	0.0179597671693831	1.13509591800842	1.10778348393947	1.54139710712967	1.46504402230038	1.21056739120083	1.36506207849029	1.35622493740043	1.35688797387829
ZNF443	215.648008973854	0.585418984668233	0.011800352810793	0.0433106571956515	0.456953947882749	0.368936064351424	0.600739819323093	0.696462403926354	0.450134176304268	0.419287298288621	0.504795003590937	0.568872834630946
ZNF445	2822.79021938481	0.343191686691295	0.00646565003693398	0.02663658749605	1.62196070179415	1.5452890586233	1.91548661458271	2.13810237818817	1.44328103521022	1.49970019493403	1.85102826746605	1.81571531522583
ZNF460	4862.02258450616	0.748535754329117	1.64849162364484e-12	5.1610762059714e-11	5.78713488501477	5.96908165595633	10.145963595758	9.94276013524425	6.21700246354704	5.86820307236803	8.63664444140029	8.7929102022075
ZNF468	1727.62509871733	0.707656567179481	1.23691087109688e-08	2.18112379812064e-07	1.93694809612085	2.02844065463587	3.30963731113944	3.30142071533769	2.59026528162661	2.52592791723952	3.46908276042768	3.33515112669743
ZNF470	964.066357779881	0.509485327350459	0.000223473341396793	0.00153815620477945	0.727990167883194	0.718653634965726	1.0466964633425	1.04902924020722	0.764874492726009	0.661768713121937	0.90009289127166	0.834060223184498
ZNF471	681.98090252884	0.472089031746852	0.00165322368651197	0.00859663604770256	0.608535549326699	0.572447840284002	0.849936401439667	0.819815440079003	0.603644080933367	0.5199080325864	0.687170795344951	0.691286585149839
ZNF483	95.9833397688195	0.842560283587865	0.00391369134474848	0.0178104560692205	0.0881150917695155	0.0683814751099845	0.183291748395539	0.145263690937398	0.179711356803823	0.139289795210964	0.169191925740961	0.204543391279077
ZNF500	633.992771913258	0.418646260932085	0.00806246907220244	0.0318839232152309	0.662068975146007	0.570134180537658	0.847855899103696	0.826572570189842	0.697054971040491	0.693467660099498	0.719031811988717	0.793859209773095
ZNF507	2257.10143623072	0.489661187763317	0.00032288417073901	0.00211990699477918	1.56174089856886	1.59907221046385	2.09358513407893	2.4094496553899	1.82235765260628	1.83935797353174	1.88118676493363	1.94812799086463
ZNF512B	2644.76173532213	0.375626882038486	0.00705626482374413	0.0286211550158279	2.86435829606108	2.2087846414825	3.28742789909626	3.36557133246997	3.33262590440874	2.86631171436004	3.12653379896562	3.39494935557139
ZNF518B	2438.12339189738	0.381067508296102	0.00125958560921833	0.00681435814587115	1.92052075463739	2.05420475114135	2.67179459829411	2.57593631813519	2.0043958867035	1.93662296704883	2.33755227807948	2.27844826354929
ZNF524	271.395874981376	0.632378665159299	0.0122667471067941	0.0446829395689175	1.47073146850564	0.890759747780886	2.33545256807613	1.61887806196752	1.61148624650058	1.20494213877118	1.80384149023553	2.0735398049279
ZNF527	431.641363261748	0.431344913696476	0.0129730120778979	0.0466029185534049	0.482747354623475	0.446529273548159	0.647473852903428	0.63356699291275	0.437687260702082	0.465609113018968	0.532098271969296	0.62873015870754
ZNF528	1609.66604665938	0.530665330631701	2.88369534642052e-05	0.000254250192701027	2.12203434116546	2.17886162065505	3.10872354055307	3.20399541660858	2.77720500238941	2.66630204134283	3.08258281815513	2.99614527702996
ZNF528-AS1	159.293367763508	0.922713842619172	0.000475476569361062	0.00294586376573906	0.506079573656917	0.504333270090544	0.908613292208585	1.23726396878174	0.638363710671428	0.455300153641543	0.799443884104704	0.796541193159997
ZNF543	692.063943306642	0.532169095336487	0.000459469047613006	0.00286902994873772	1.04917937316321	0.950539896967947	1.47876076398864	1.47007124308761	1.08745132638216	0.983031603858041	1.22314824965512	1.2024177619959
ZNF551	438.65635742526	0.44168378458715	0.0117451585393491	0.0431549223701974	0.62480295464862	0.666541566120288	0.909057265379144	0.892315385115741	0.534340341285927	0.57984088450821	0.692175192202693	0.778983706753591
ZNF558	1296.27374888474	0.343659547623809	0.00702489592635076	0.028523481658329	1.77606403802289	1.79840919060941	2.33495904028101	2.26112932072922	2.14830497113558	1.91258041731596	2.10060751344676	2.00298671036865
ZNF567	456.864576273276	0.467545881595755	0.00826377259857093	0.0324716805333155	0.726074888896788	0.815779750640642	1.15579564551528	1.04734522327413	0.838402679069686	0.858679757951963	0.930123765707825	0.963115833525017
ZNF577	438.886787970385	0.607100132047314	0.000613302042331024	0.00367682186282229	0.688955405906662	0.634519676154981	1.01152763831702	1.06278842567195	0.73050454052649	0.712703706431175	0.831722293677086	0.79280868359292
ZNF578	425.308265929209	0.502720655896915	0.00494250618230853	0.0215220206425379	0.325645572086548	0.347378622432126	0.485608350126447	0.49614586294773	0.361518675210905	0.346977906403876	0.447447598394682	0.389744605868387
ZNF582	140.420381877589	0.818432645913303	0.00145234405322869	0.00772128668235774	0.210534859472707	0.18979065635545	0.374999715453704	0.402529774289833	0.212704274251326	0.24111288075893	0.310898929776758	0.255995634592576
ZNF582-AS1	67.7379070253537	1.21778635336792	0.000140996961135426	0.00102470924199712	0.116193029055732	0.0896146684254449	0.370603286712222	0.289307476992339	0.146396645478419	0.134332182604021	0.22486809722542	0.160548386806849
ZNF587B	731.991050773803	0.422307028065624	0.0131943491552859	0.0472224324755865	1.18601686196225	1.24223351253235	1.50552037273446	1.80696653986737	1.090985429617	1.08616847792501	1.47402395283828	1.33346779380599
ZNF594	619.189010582731	0.381126413323481	0.0138994237599528	0.0492893828928582	0.70994310035798	0.720897494478754	0.984439744931343	0.917261366155683	0.648806306469338	0.616620363912731	0.715049210940448	0.763958157853681
ZNF596	317.689334790178	0.787929651603466	0.00076233382294698	0.0044595869184074	0.38842543623473	0.536710696785654	0.757267794813889	0.969630223812735	0.70354256544713	0.679306759251763	0.824244251047428	0.825641851031822
ZNF605	1030.00012197933	0.700742912846813	1.00321313981872e-05	9.8823435659492e-05	0.738706668494799	0.86061163503966	1.26996629831004	1.40971567988647	0.927202557868119	0.815750118508363	1.26947726642774	1.15612247362152
ZNF610	232.234799694783	0.743713033589829	0.00176080762644423	0.00907926921374692	0.372816455476209	0.531690051456904	0.832190413784074	0.819576280654785	0.721033972372781	0.589163241075195	0.717656731399829	0.775133273159427
ZNF614	628.958465688861	0.471529421996627	0.00216453361583189	0.0108027000568732	0.736192546558073	0.725082926915318	1.05009170921804	1.01882982295144	0.997670934272146	0.847293079584363	1.05124944608286	0.921341046240397
ZNF621	2607.20768326085	0.489939527321665	3.14560211814184e-05	0.000274946298711963	1.61615901598506	1.70836101648582	2.36570636543108	2.37199062000973	1.66804878686313	1.70949711373628	1.98649774594583	1.92300932486144
ZNF626	605.758542587912	0.428904293507635	0.00621485665767584	0.025752431462949	0.483281135282894	0.496120539399477	0.682574976688381	0.663892988336709	0.559237756344688	0.562976331445184	0.583660537477356	0.561651538253356
ZNF654	2053.67869578667	0.424015545162339	0.00677515474910071	0.0276516303259018	2.19408982115705	2.3952599276976	2.7772497000529	3.48038557734885	2.36449404256864	2.32845284391551	2.68528993926307	2.48985382293577
ZNF671	530.188604373362	0.449208527391141	0.0059512422057868	0.0248121303431771	1.16464623221992	1.18019059268701	1.64526305635733	1.62826470118861	1.18734647286554	1.22998582868165	1.28569923178505	1.30698966177028
ZNF682	180.818167468614	0.636297852346462	0.0085492911306607	0.033355903766634	0.239595146882286	0.298737287365409	0.456032735185236	0.447107335101705	0.258667161533881	0.246651120527045	0.323301812613597	0.325861498382034
ZNF696	316.344180993295	0.511005972096762	0.0100176786375473	0.0380266919934963	0.389835178424309	0.32671581780654	0.564916259528236	0.493682685307413	0.45751716543877	0.413751152525236	0.44768052019893	0.402663169020245
ZNF697	1736.30886009124	0.400109453758586	0.00308173540628124	0.0145228123240257	1.8620504722269	1.97109302872968	2.44330065474423	2.68233614531517	1.43917168676971	1.37376905594335	1.62121857766117	1.62188319049253
ZNF708	938.477694377617	0.603509593644114	4.59840350758283e-05	0.000387256584309202	1.13629339446673	1.15180589794851	1.69563721373868	1.85408688745137	1.0150140702683	1.04641621709217	1.32124208141768	1.38793337643977
ZNF713	104.536941872462	0.85517851707835	0.00309449805794208	0.0145778774760246	0.0813549637937323	0.111924534369395	0.198371225045318	0.212096768636002	0.155139151191211	0.122017905838205	0.17579268898723	0.179371959897297
ZNF718	401.991962488344	0.708725248050216	8.36615325784064e-05	0.000650674081726823	0.378406267246098	0.368916619930869	0.680974793189433	0.594791962314746	0.400087129930781	0.482736679349167	0.528237140873451	0.518422149436686
ZNF721	1275.6576048825	0.469435002268643	0.00329725250954569	0.0153459532662097	1.37379312342797	1.57737123282085	1.91278924626773	2.25648902318243	1.6076485844577	1.46702436309864	1.73747162317949	1.79408510854963
ZNF736	1221.63964419197	0.842956233778667	2.17571129408175e-10	5.0648012482712e-09	0.606367351797885	0.591839285921156	1.08780596560619	1.11387193736022	0.621939413970848	0.617624143020252	0.889568589081256	0.793097792949573
ZNF75A	994.388919906278	0.414864696241527	0.00429388948620033	0.0192237190668188	1.9956152740322	1.87086121133177	2.49345082657305	2.72615204648106	2.01903771340958	1.83286199950901	2.16544625221992	2.20670345313542
ZNF767P	728.060719304263	0.696606692313532	3.47386282522037e-06	3.74076391011987e-05	0.944903565520391	0.946551347212515	1.56627266698625	1.58161987805861	0.953032270198559	0.92673187159838	1.3788297827319	1.34415971200668
ZNF773	589.984530193908	0.465720266464093	0.00426723457154695	0.0191424038408532	1.08502138092597	1.12359203439063	1.5175887586776	1.59772184499177	1.35774770173841	1.25495403123752	1.35167080948001	1.29350067390685
ZNF778	434.232643349823	0.499367142010791	0.00518453547071397	0.0223314784208301	0.666495677718626	0.623428874169218	0.902244971033854	0.964723227280313	0.752636190958755	0.635045404878553	0.800189907605161	0.735515411911173
ZNF782	407.521003025742	0.660369457963457	0.000944007553092792	0.00536232765879043	0.542123074744637	0.670976836462116	0.946903303006525	1.0625018682355	0.607150591268781	0.590734710816447	0.772830879865192	0.834965977285404
ZNF783	652.579679060783	0.520568137120855	0.00109160600666136	0.00609074721126028	0.795850002079737	0.695833965016404	1.06644081192033	1.11360241802352	0.680095380853447	0.638640001509941	0.824267121309666	0.834320121881831
ZNF786	257.375272074952	0.593190306877349	0.00462359295572241	0.020389336395874	0.409137770379919	0.393596860977052	0.61491940474358	0.648317008892331	0.442694441388922	0.446960812656414	0.488217394506763	0.492082770659527
ZNF79	540.044848381116	0.448353589126561	0.0114351300829133	0.0423031002109962	1.37391757248344	1.17790708944415	1.65505418185792	1.88713811061725	1.32825445789838	1.17487043307035	1.52344154472096	1.78828796412392
ZNF791	1217.10973686399	0.440689464406831	0.000665031721947058	0.00395017744371276	2.70347880810775	2.6808126720239	3.73196342631846	3.68422093021909	2.87754375741419	2.87744714970436	3.20347391239813	3.4746789180255
ZNF81	658.945630512598	0.422771733941411	0.00677541611090859	0.0276516303259018	0.485001294490585	0.446522560233108	0.622476498230225	0.64585822895422	0.459720745174035	0.466470303255238	0.546206873263397	0.587762761663886
ZNF814	461.995499020554	0.645897433427913	0.000243261467087637	0.00165665223683801	0.357324078192938	0.378999995546758	0.583238196962509	0.608907660379713	0.37063288150621	0.369231954251447	0.461925890789791	0.458180003074578
ZNF83	3555.20558671683	0.378310968740457	0.000883263299362022	0.00507698092812212	5.75647007701349	6.03773155158853	8.26444088387846	7.29142826887299	5.83694304057922	5.71468298405376	7.19912524372129	7.27900325481555
ZNF836	361.992343921872	0.672568810463471	0.000518456390322539	0.0031659110276299	0.57778840067239	0.49674953643045	0.845735094628412	0.928991506886341	0.740457062164645	0.558546535974041	0.759075407923103	0.796201502002854
ZNF839	696.26024732988	0.389942931736563	0.0129459897104447	0.0465305636018508	0.85989926442038	0.954583566469857	1.21873877757954	1.20857649720205	1.04051876819239	1.01345182549984	1.11537247873104	1.02226248438527
ZNF84	2507.7352942162	0.549507721433358	1.83059603972133e-06	2.11794794159375e-05	1.76588871747336	1.79455000469269	2.63521385791201	2.6522418163859	2.00591330342412	1.87444861617506	2.25598230942635	2.20801142749683
ZNF841	1976.35917151821	0.490369303505366	0.000205322994666136	0.0014351387611677	2.68244467949117	2.82673389658763	3.75122114381637	4.10589876214293	2.52094918919901	2.5246440878933	3.3165961489014	3.52744687967813
ZNF844	594.796469031147	0.456832814580131	0.00450866509234741	0.0200064617368762	1.09824874015008	1.16256270590349	1.58043022002882	1.5929520214091	1.42819394435461	1.55622621057595	1.46606279986639	1.72878905542799
ZNF862	804.633717587405	0.638684523902163	0.000236283126504958	0.00161563664609684	0.617752444549623	0.55949305857895	0.834548260609326	1.04489004834984	0.902984227614652	0.725322460308923	0.970491384289634	0.959519284352376
ZNF91	4721.87088394448	0.383261689328304	0.000330899371413344	0.00216538867406315	4.84088492871903	4.88982730969394	6.81189346991366	6.0462601400683	4.97396743726228	4.98126730944952	6.30618179436826	6.34773924476206
ZSCAN16	133.976879104584	0.94085566857006	0.000278706054890287	0.00186793825192821	0.276242687097536	0.255035157886331	0.577265477500553	0.570669276576035	0.236341755402795	0.186835713311207	0.351773977017992	0.398015927220272
ZSCAN29	1891.73861348784	0.358053144625308	0.00404382622870783	0.0183041331135453	1.9415161975826	1.91406225670474	2.42448001647869	2.56787582586335	2.16627509358587	1.95976876950159	2.29404748809314	2.2401628230659
ZSCAN30	2310.06707323671	0.60325783047246	4.41725185785217e-06	4.66380416685797e-05	2.68163672350393	2.78209403859325	4.71598225188434	3.79140185348346	2.32842649368695	2.55475970585262	3.72362453529075	3.78399544244896
ZSWIM8	4775.99942898091	0.429702582927868	0.000214537038461839	0.00148877036695556	4.73477250815656	4.02435075269368	5.93153219337714	5.98753272090933	4.61280656984839	4.12547337023804	5.4848528442237	5.38003602195201
ZW10	1421.64808625441	0.351849660430427	0.00542739420103418	0.0231271287236885	2.7077547815905	2.80588017127292	3.71370138831945	3.43020771956092	2.88412927910963	2.81094475980323	3.53334445376227	3.32910586149813
