# Supplementary material for: Integrated analysis of H2A.Z isoforms function reveals a complex interplay in gene regulation
Source: eLife. 2020 Feb 28;9:e53375. doi: 10.7554/eLife.53375 (PMC7048395; doi:10.7554/eLife.53375)
Supplement: Supplementary file 2. [file elife-53375-supp2.xlsx]

## Sheet: 201811_List_UpZ2
Table S2- Genes upregulated upon H2A.Z.2 depletion in WI38 cells
Gene name	baseMean	log2 Fold Change	pvalue	padj	si.Ctrl.n1 (RPKM)	si.Ctrl.n2 (RPKM)	si.Z1.n1 (RPKM)	si.Z1.n2 (RPKM)	si.Z2.n1 (RPKM)	si.Z2.n2 (RPKM)	si.Z1_2.n1 (RPKM)	si.Z1_2.n2 (RPKM)
AARS	7947.43057742981	0.405476906193487	9.5088874230557e-06	0.000264227728049161	16.3396968310412	17.173209053805	12.2663267890093	15.236754762689	23.7717	22.5681349723864	15.9040514877203	14.4982164466539
ABCA1	8265.78430034675	0.579395853165548	2.00306198810549e-10	1.83306879404827e-08	5.10020129070885	5.2075561797806	2.92306448469372	4.24350988655569	8.41128861151624	7.75329244731905	3.51158964606936	3.5193713726753
ABCB1	486.61227114134	0.53629563566066	0.000300782291120305	0.00471759977420266	0.71302199676511	0.635010810899659	2.0476639885914	2.14552709622442	1.08927815251842	1.03444443775598	1.71090825644562	1.8635378247559
ABCB6	1234.9341827845	0.341526222303786	0.00470922943649442	0.0406819335901566	3.09128608552039	2.81074078705797	2.59111798086854	2.21638122076252	4.19124483994511	3.65994187744051	3.0486032585368	2.93174440758331
ABCC9	199.795257910314	0.713641868132055	0.000155126345547899	0.00273704286032906	0.123812103387722	0.141872241262287	0.0687725179380211	0.0547255119887567	0.255079579557342	0.274153198837372	0.18495675666065	0.181438270499808
ABI3BP	180.300583168893	0.962048830035605	5.56586667472363e-07	2.26043348650684e-05	0.182920246446055	0.200557576418659	0.25004270328694	0.504790708969648	0.489476727210436	0.48662678957338	0.506166464058354	0.443850067349318
ABLIM1	1029.94937401314	0.376081909421807	0.00228497198468661	0.0232511567337236	0.816546005915672	0.876696489554946	0.981602462122982	0.831248514161726	1.14678004090871	1.17576402295934	1.1861592620063	1.29206583587092
ACBD6	2261.42398731924	0.336320353176527	0.00399311402560231	0.0360852378074016	10.4411677858554	9.79645500131764	7.58501611884078	7.48812105752337	14.864994685482	11.9335615666762	8.81527606329617	9.54176020713832
ACOT11	86.8631491260518	0.699985154969957	0.00123809935902872	0.0144641616182019	0.155953420117527	0.10115203316017	0.0589933234546122	0.0785464037937786	0.314844279455277	0.292796320361975	0.156836178634434	0.160029480785203
ACOT13	895.626542943528	0.505037135547351	5.82929255662552e-05	0.00122728065835581	1.43322699512215	1.29883495134702	1.01838471368311	1.04036843596657	2.07105021348229	2.05367005335925	1.24349398516404	1.36182455537838
ADA	271.824876333919	0.62735750693309	0.000492514506314085	0.00701322264333345	1.21043416813892	0.906035851084636	0.647833642829954	0.561438011812195	2.01605831688217	1.74637486341602	1.23375540878956	1.16809771415215
ADAM10	22297.8468144293	0.419594067972105	2.25579575248839e-06	7.83931855554635e-05	30.6755482528033	31.4679493477963	20.0086098881041	19.675446481386	45.3800877335777	41.3355435688952	24.1797836685016	23.0663483969633
ADAM33	5230.7873389809	0.444517801020384	4.46823394149751e-06	0.000141652303267751	9.39525610714385	8.2029837967165	5.65724018084203	4.62223135719962	12.846039529524	12.1846117712296	9.52553235610233	9.57705058033176
ADAMTS1	23098.5104066691	1.52143115685972	2.99546555566029e-37	8.22375113650976e-34	20.2200322057122	19.3633641703318	8.29143890911531	9.0267799529346	74.7351521722179	53.6048093422916	15.6901476862201	17.0574586962137
ADAMTS10	224.520251666337	0.603076457580425	0.0015268359293613	0.0171653372664559	0.345254246538568	0.27660842925352	0.333382817822831	0.520866730646904	0.641753637287772	0.470342023251214	0.426537622851234	0.603548623433313
ADAMTS14	91.1639798360409	0.830813561131831	0.00012885126359635	0.00234529286621717	0.0878730665237041	0.0580908888108327	0.19774532334476	0.367731639596553	0.236377595330207	0.17158248118873	0.218478579336291	0.264046117887777
ADAMTS15	2258.35072576946	0.464244547465026	0.000445739861042124	0.00648851651381256	2.87900107351131	2.5388182396404	1.51203231287214	1.2491794119117	4.63890167464215	3.32970962156333	2.78101064212785	2.82454470911117
ADAMTS5	647.831023286608	1.22533304051425	4.70666053815127e-17	1.34600685848339e-14	0.310814549044651	0.297627853625874	0.328413816442625	0.555351794549404	0.917523398358926	0.738020945073545	0.417501983721284	0.397218939503615
ADAMTS8	1582.22238907757	0.859893610337462	1.37123370958137e-08	8.63436932634105e-07	2.48954497670268	1.87431676445948	3.41101436090658	4.83580220204938	5.34342984267236	3.60029484553958	5.07516155493628	5.28005788082623
ADAMTSL4	739.967320744391	0.50447584438742	0.000414283343293454	0.00611491124020349	1.26587536039356	0.965127310374045	2.07070725251256	1.64135251152491	1.74254944615905	1.65806879840928	2.38477126273865	2.62497265950448
ADGRB2	489.230028985284	0.500866907973052	0.00214696330620816	0.0221977335082402	0.674987519157951	0.511696697385001	0.330959051196932	0.354414887206751	1.03248138704903	0.809025276799663	0.453900292984623	0.481737239642394
ADGRG6	497.794928042031	1.31493415264447	5.52528905635923e-17	1.54787026278863e-14	0.325387636262972	0.278595924732199	0.270399997948049	0.149574731639684	1.00359994016816	0.809171248307879	0.39728827827851	0.389785928273685
ADH1B	295.653111170237	1.3530477745173	7.15148873488107e-14	1.18275284173148e-11	0.42905019217821	0.377399087364194	0.103403171071701	0.111861507993834	1.58359054659548	1.16367068013359	0.34289063956833	0.428017206737902
ADM	11382.7492709953	0.408860745768605	1.01455029394562e-05	0.000276873397315934	53.9443675961661	47.0036786233032	38.9970305235011	27.4993171466116	69.0056842952191	70.6887146286683	51.1284533218169	50.1746121370251
ADM2	182.15998318522	0.887655344831061	6.52793564898624e-06	0.0001942593890715	0.237573246908595	0.20940570479007	0.509678000119694	0.659091052608702	0.623601782264841	0.45461186920671	0.48427115507932	0.464493718919263
ADORA2B	2230.38847433049	0.385556812631141	0.000425917185269973	0.00626641500771803	8.9193945271731	7.87704276217353	6.8209682374273	4.44613888490453	12.1649787592348	10.8180742732818	9.68944965612337	8.58032583990019
ADRA1B	322.753419265107	0.851126144405991	9.09601623770875e-07	3.51721168718389e-05	0.872085645484347	0.673089765396654	0.835072930663873	0.700951573204077	1.78138567794917	1.50360757982965	1.72917701950453	1.7851043205592
AFF3	1860.88989815988	0.644644894207692	2.42214864889855e-07	1.09012572142395e-05	1.39974963205376	1.44424146397896	0.717520043687809	1.12230211093663	2.6972233921769	2.08677476981819	1.12872174471893	1.15561759120698
AGPAT3	3119.54133239439	0.744877631814221	5.09662161768805e-12	6.53844158373868e-10	3.08446210080783	2.62593613149255	6.19822040918601	5.552868884174	5.39412776289265	4.794370203032	5.55823274378702	5.79470943647754
AGTRAP	618.080496586809	0.544534296200987	0.000708137122818408	0.0093093634693499	3.75736938313876	2.49421826189798	4.78093750599002	3.96073936939256	5.27653452658216	4.7361322467746	4.05402792449573	4.48252851962704
AIF1L	22.5390801453292	0.717759064514094	0.000198847513439917	0.00335329215846406	0.00282105636702319	0.0149194904176131	0.0154249641325152	0.010268750684891	0.098428748721544	0.0998680866196251	0.0988095163797846	0.0729698545838154
AK3	3096.00013063263	0.799967271643433	5.1514622432923e-15	1.03991356196578e-12	3.85349768947153	4.04453844056996	8.58347692811373	7.79205387965339	7.67289363768265	6.98353468748283	8.53126472856282	8.18563140423789
AKAP6	182.171362088099	0.855664586152954	9.63363117010532e-06	0.000264481710144071	0.0816536527836416	0.0965278246399207	0.221481961884835	0.564431070577437	0.218233791981074	0.194852415683862	0.299895346542024	0.344683954631797
AKNA	747.999518803878	0.456397844744202	0.000609436663131976	0.0083075839869043	0.959256389658142	0.893782139771948	0.856026752915854	1.12163563252516	1.42998243113624	1.27972457794648	1.05702041020384	1.04674868994078
AKR1C1	524.821561250056	1.18462094743177	4.15982363667711e-16	1.00178770281872e-13	1.82340481891267	1.71244969754722	0.652798128539271	0.535546251273877	4.60599435261093	4.70073288108665	0.831933634560804	0.65746136118378
AKR1C3	74.5219441621183	0.608906037252523	0.00523701179170579	0.0440493020004568	0.21669559793784	0.179898537296924	0.0688864875463464	0.0351588020608825	0.394639628586287	0.477342462667046	0.1112778713617	0.13035069477927
ALCAM	25982.4827168037	0.42170128267937	2.17361547176708e-06	7.59216783230195e-05	27.6232859561824	29.5016099661679	30.6734137178439	32.1535554882297	39.4351468875634	40.4059571489667	38.4445576728914	35.3942988427614
ALDH1L2	4568.24883341753	0.564475527562754	1.69348019723424e-08	1.0424395814993e-06	3.7998484226996	4.16128216705393	5.85938101313436	7.82031664089334	6.42296741030695	5.99099931258203	6.30462120748117	6.37904036766998
ALDH3B1	1631.19011219582	0.643945302963994	1.19343885846807e-07	5.91686966538116e-06	3.80403715552537	3.08710309619412	1.60536670675847	1.46215141347534	6.09848699340199	5.41148038078822	2.59107177995145	2.72250047944087
ALPK1	1213.06383404777	0.473411094174254	8.88041024736187e-05	0.00175397685561923	1.53948517536667	1.51012390048028	1.30716310514774	1.30922728989172	2.40443318745038	2.08330173100437	1.57089913440382	1.6642335421631
ALPK2	14690.6198970891	0.458334656795581	2.6598268183146e-06	9.10509793890388e-05	13.2134334616913	14.4964541426484	10.7509348177606	13.3001287907552	21.1471389049849	18.7785217025647	16.3993515810661	16.5970910770544
AMDHD2	515.94347822549	0.487207226155939	0.00440325153156004	0.0386961803929095	1.80473033477695	1.16151881689536	3.69255533765824	2.9201212837568	2.53959010234025	2.0504971874567	2.84414227196401	3.45852218000972
AMMECR1	1051.18104214319	0.550433476885509	5.51250137966796e-06	0.000168155792086005	1.1824366783668	1.15465603702681	2.66617645654239	2.35137832388715	1.77073768852921	1.87639952312998	2.6765854398424	2.69552016879179
AMZ2P1	223.968863464721	0.526772145928584	0.00391179012071264	0.0355374870860505	0.44353448130001	0.3851982044969	0.290596106674303	0.313047727517809	0.656321295077833	0.704503111664321	0.390695493772881	0.365305884890727
ANGPT1	2015.40972344519	1.05568664385104	1.48990321689782e-22	7.05237981322632e-20	2.24667511957615	2.39278250096642	1.14799584135916	1.24257418232816	5.15365402302546	5.30498402608409	1.78498674692497	1.39298974560055
ANGPTL2	6562.23609544928	0.337430968445783	0.00279310744812447	0.0274059942390312	13.7435990316887	12.8287668202865	5.89569593526558	5.69500183954135	19.8653904774178	15.3171873098815	9.77349887473341	10.1786724372777
ANK2	482.674093883743	0.988702075329891	1.21402194104314e-10	1.14143008114378e-08	0.164915524332941	0.175343568937571	0.0488434182065411	0.0462730229798568	0.423027389416266	0.357653466966287	0.124001752313989	0.144469666539807
ANO4	1771.99878725893	0.336430765827265	0.00257303017142248	0.025649952914391	2.29128862573632	2.32795884180554	0.968632420055079	0.90888716013755	3.24631780534735	2.8650872398725	1.3858622400102	1.50057643587894
ANPEP	4634.93988031007	0.391532952560682	5.56783848308307e-05	0.00118495688150824	9.33018483598891	8.68359560623645	5.83696912942023	5.94562774672454	13.0100369448529	11.6602339647654	7.97434992791321	8.28948005290503
AP5Z1	1242.38379989927	0.491605518554087	0.00128614005405564	0.0148860409123286	1.80795005801069	1.19758511692136	2.40052995667033	2.21560529589806	2.561077162468	2.01523453164381	2.28657389067817	2.7771036839422
APOL1	787.48050272254	0.588529859891175	1.45321012330389e-05	0.000380691132873903	1.70437037474609	1.60158361847458	1.6722104686316	1.08450658360174	2.92397156256149	2.44294375527245	2.27728888034041	2.10920863451234
APOL6	4622.83626837999	0.52429105625617	5.20321102719252e-06	0.000160865940924036	2.97895622571036	3.09353091801151	2.81965119081114	2.69356374469131	5.21845557777117	4.04604115214577	3.83289142229864	3.64667854471293
AR	2355.939599144	0.347378763884822	0.000814112055235926	0.0104247352446115	1.57340215137527	1.56051496153117	0.913664404116277	1.09668821887686	2.01371706138376	2.1537226817142	1.33683420200886	1.25419546517644
ARHGAP20	1857.8237966699	0.876032572852226	3.21948535667306e-16	8.03525008928202e-14	1.57051551487246	1.50020222667237	1.51064817448025	1.34060349333408	3.13492698377922	2.90798029091281	2.41268920395908	2.60549554154022
ARHGAP21	7727.43590030374	0.601399079596215	1.82399582127391e-11	2.12186361344296e-09	6.92492700783883	7.064747172319	8.50686126242073	8.07419422638777	11.0256184484623	11.2452213473844	9.94778972021778	10.0231990920686
ARHGAP45	133.254026855882	0.584190181906987	0.0040407218086962	0.0364142680651837	0.118279058281716	0.0991033063262172	0.107787650809941	0.0817692620009426	0.202609915011377	0.198700790800066	0.129855476492904	0.140474416766845
ARHGEF3	56.6000037412257	0.697443120017499	0.00148348703912973	0.0167328073838404	0.052132060450162	0.0523842484082997	0.150125034928589	0.258709745899268	0.171383273322553	0.123700032122704	0.187359650235633	0.146601311900293
ARHGEF6	978.678026940478	0.608981295652372	1.02716591019025e-06	3.90579126016112e-05	1.1008421212732	1.16032383868867	1.13827433008648	1.19971934971832	1.92010951446255	1.7831162282961	1.39151560053988	1.4062834571379
ARL4D	293.921653856371	0.67016014322933	9.25275572614485e-05	0.00180159684897575	1.20240541747682	1.01545252177696	1.07280382245679	1.02354501306195	2.08909895898531	1.93948609436957	1.3421614681372	1.26928237808846
ARRB1	473.167209235443	0.450703047165919	0.00418570139351481	0.0374296683711308	0.424486099235778	0.426188770889549	0.327600030910383	0.493319820276471	0.711733283363898	0.553366960177698	0.474723281084443	0.457492467717726
ARRDC4	574.175133582286	0.576512885031798	0.000113463029564847	0.00211308061453842	0.819443695016911	0.979629441685733	2.28052045321861	3.15918417808152	1.55224581116373	1.39669911623748	2.46216548858641	2.81016680076616
ARSK	2000.23212475662	0.600090942337057	7.67555509842656e-09	5.08996834957011e-07	3.90770703883735	3.82367304634389	5.1730971975163	5.6209115127882	6.25627251178883	6.12767872852704	6.8026277507553	6.14298445006689
ASAH1	3311.19305983637	0.456681293994993	1.08251471281488e-05	0.000291938692786049	7.32395342532117	7.48106811156159	10.7113901668201	10.7591385591255	11.4200684985509	9.92822712218176	11.8960681738677	11.8965728907525
ASCC1	789.946200814699	0.409665673844906	0.00211312291198785	0.0219416325362006	1.4911728136449	1.63545676614653	1.57632990631247	1.63096216978522	2.14719247317834	2.28004740209309	1.91183371911041	1.83294158342315
ASNS	4604.86643953683	0.337704208008039	0.0012493265884822	0.0145211736495302	12.2454618952886	14.1065332320636	13.2687483327989	17.9038656129219	17.7424950394422	17.1170547380764	14.2357109100767	12.9579022476904
ASS1	61.483696484728	0.698179524176624	0.0014716470702302	0.0166444930750021	0.145783583330274	0.153484863169995	0.0836478777348492	0.0540484690066362	0.493997271992736	0.330626813968517	0.11511503933969	0.153985710865621
ATF2	2794.67423260394	0.377812966131	0.000170360331613564	0.00296392429918808	4.00809374390845	4.19268891128115	5.11997540909185	4.53819997388779	5.58552313937454	5.56243669398079	5.34117649348454	4.82559611207398
ATF3	517.537529740947	0.576647403054458	0.000735177443435435	0.00957719177444513	1.01937125981999	1.51623718075403	2.00796667667511	2.6033310509664	1.97896317164369	2.31825258882699	1.66281299654447	3.44801916406305
ATP1A2	356.14395175055	1.06027294814696	1.78494134616021e-10	1.65553309856359e-08	0.352898797771866	0.278018019278735	0.0383249727305677	0.036606769552598	0.803847407233658	0.768016643250259	0.155933731134137	0.146738930732193
ATP2B1	6805.95270222804	0.427781245508294	1.95552419392235e-06	6.95426958807568e-05	6.77870181789389	6.94260103524794	5.69608683609106	4.98296792348734	9.72502444043111	9.54134119088407	6.73734303804807	6.06130947663817
AXIN2	89.0598553625491	0.719362156695039	0.00088023279348879	0.0110891801757876	0.113172888886514	0.0950787007925614	0.217011968801486	0.250318996344534	0.292495260851167	0.20979607291132	0.186708324675716	0.223616740098654
B3GALT2	664.214446198704	0.728138407724472	8.38872910381302e-07	3.27136603431936e-05	1.02086858014894	1.19171795047032	0.845742783968109	0.834308497901762	1.87088971231185	2.21450308215884	1.14991748147612	0.996028073627743
BAMBI	1198.78821990978	0.783301434294332	1.33923244301533e-09	1.06881649681811e-07	4.34659823317339	3.81084372510653	3.8819373770897	3.41997644257304	8.41860402696465	6.85556808331558	4.93579101391524	4.65626268188418
BBC3	390.634682852433	0.562679239876639	0.00322237652823847	0.0305059052435375	1.35263660578794	0.954020405426647	2.69101200037852	2.38091890581596	2.53698103065187	1.44455905169884	2.13965614887233	2.97248402789108
BCL2	379.338829059844	0.912120682106751	1.54381082548344e-08	9.58909104136251e-07	0.299945196021456	0.305899980086461	0.2101558160855	0.21580198380414	0.711711221533782	0.614344075819219	0.237568227712816	0.229923721444262
BCL6	912.411909733844	0.347890563615776	0.00587880772668458	0.047932070256248	1.75463531641322	1.54328053379248	1.57154773249129	1.67287829907534	2.21876971080383	2.19757662058036	1.672426043237	1.80470442327782
BDKRB2	3950.00736135102	0.436058070016762	9.90324288545148e-06	0.00027121378246851	6.49276306097444	6.59470803548314	7.35327555698441	8.15705624119787	9.77339078906834	8.77345665240313	7.62293600751075	7.85401101627646
BEX4	654.34558670004	0.468734748649385	0.000616524811569418	0.00837095557706567	3.51022811461982	3.40619123399948	4.91533567456286	4.95559535172858	5.37692760352293	4.87023355045629	5.35742878873889	5.02271745909947
BIN1	1243.19332864156	0.434725248494765	0.00169631114640457	0.0185392222187066	2.47027568447976	1.91477684411943	1.6441847989195	1.57451069404908	3.52396569713128	2.79080529324007	1.8440192772384	1.88040429773456
BLVRB	1523.69282517358	0.461252875669328	0.000235763176301748	0.00387100829432679	13.1719933391144	11.1813105677422	10.9094950908095	8.44722006727081	19.5400843951494	15.9932030716015	14.5650110405659	15.5703951768869
BMP4	708.217216271602	0.802435822771337	4.3863863932128e-08	2.42059143637351e-06	2.07369574969301	2.04122679768309	3.05872806288107	3.52040088981029	4.54440731444992	3.46849452039571	3.57488350827464	3.63844739508179
BMP5	50.9961240347436	0.676165434086951	0.00156165644584744	0.0174141819919966	0.0276470629903706	0.0647997250213101	0.0251947556466738	0.0815764297954066	0.233848855904686	0.108213656524015	0.0306200205397261	0.0233373458585634
BMP6	30.798179219769	0.574648276351598	0.00545237933385096	0.0453330170295409	0.0237322112398121	0.0348640576156829	0.0480603401486138	0.0439929398891225	0.0797366507217286	0.136239392093132	0.0783049976903704	0.0734534326573705
BOD1	2224.37332634699	0.334166688612667	0.0031964643348679	0.0303233351242099	8.44060648478977	8.21294804536526	6.50710167366439	5.65435296648122	12.0407776344546	9.95656408686072	7.17725008979239	7.25084164651184
BTG2	246.925071119768	0.645437511705806	0.000653854746806041	0.00880811001904468	0.53368538313292	0.537726969345656	2.0527207709126	2.38586808666992	1.19857242817986	0.799385754521722	1.85806119196833	2.2067485325626
C10orf10	1004.29103202455	1.23342188552897	4.10200877677634e-21	1.70631134784269e-18	2.24748904648287	2.25106049986588	2.65727953707906	3.60561009940193	6.54222446089916	5.4176052316289	3.85411857439729	4.71920136729999
C14orf1	339.685771315476	1.3211354480084	7.55060470516742e-15	1.50213262011352e-12	1.00428690738634	0.792410223807879	2.46219988344227	2.07939200760077	2.69772747518745	2.95704356743092	2.83676346944236	2.72447276340848
C1QTNF6	321.889627976197	0.659121856706824	0.000302088599222273	0.00471759977420266	0.61513345469998	0.678500159968644	0.826919402957573	0.895849692009177	1.44400606537238	0.95598558599531	0.74526793861336	0.901608243076068
C1R	21202.6662739532	0.326136587725903	0.00191587478220531	0.0202957246261543	64.6098419885326	58.9281736609283	24.4688774803136	23.4055402101148	89.9329370786905	71.8268554312607	41.1784652373595	38.8908607371249
C1S	19394.8664935501	0.501879159680275	6.74891131710694e-06	0.000197953644551126	47.3656799649743	45.6410911830427	55.2991304304967	48.3897289419556	79.1710974809274	60.022841907037	63.657551633488	61.0439475972607
C1orf198	4010.05182486015	0.533336615800402	3.37655958562003e-07	1.4621461650412e-05	6.71805625890318	6.21474270947578	14.7948569608372	16.4586744448611	10.6741976045198	9.04316746795168	15.1602495056822	15.3945636239502
C1orf53	68.1962214976826	0.709413652665622	0.0012052669245491	0.0142014584320048	0.423666493022942	0.502205775177357	0.998501063995358	0.567231955841242	1.38192233856608	1.06231411896619	1.04564231927297	0.852660023964412
C3orf18	523.875887959441	0.437434423379233	0.00314664598597568	0.0300169633077589	1.24946552353626	1.28332289900529	1.15471979902592	0.991417548216528	1.99227865045834	1.7053975496771	1.18519219491369	1.23132832302717
C7orf50	961.697709382559	0.610399545737348	0.000152942186223984	0.00270546055450596	1.54186158562102	0.928595911103761	2.01341363600473	1.72236377079879	2.22585112017602	1.95521353474948	1.92551341197991	2.42956130883953
CACNA2D1	4744.17653199041	0.4833407269917	6.86664329120203e-07	2.7163807624879e-05	4.01838350258137	4.20152149310072	3.84811272039163	4.05088601634173	5.82598562111115	6.22778950529488	4.30214646895424	3.75238940540834
CAND2	169.335210971057	0.790865900353657	4.96423382456908e-05	0.00108165139222	0.215119677841015	0.176686063416622	0.14851398665262	0.139735066212279	0.429618338550938	0.422040591992205	0.23494297663144	0.234909001346052
CAPS	147.759528572159	0.649368300451493	0.00124760269059055	0.0145211736495302	0.413623100579567	0.371751208107756	0.6522238094281	0.668217308482604	0.854005783388293	0.680329732538966	0.661737221951771	0.745928593391317
CARD16	789.621935771649	0.520666494518768	0.000277608964009534	0.00441057667703573	6.83195466505747	6.9008572596353	5.30226019710295	6.70429188638517	12.0844532783955	9.23197955501173	7.08640892568418	6.86226166264403
CARMIL1	215.340084024012	0.755043068613973	5.07275479484577e-05	0.00110005853189333	0.225981107260137	0.2137627006732	0.195890796108594	0.19171233786482	0.494304065251544	0.402546212302536	0.360924118923999	0.319253319848043
CASP1	1703.13147804855	0.470555508983749	8.10218634258825e-05	0.00162107542819136	5.77207108408417	5.79105372843212	4.19991338421581	3.89385960668039	9.34393380688609	7.62986856121517	5.07263282471458	4.74490317962762
CASP4	4255.37000551973	0.390827085328168	6.89076806756893e-05	0.00140549143036432	20.6105681863199	21.9054168628194	20.2124030708625	19.0567735911917	30.2203607606872	28.0884732615926	23.5053869679072	23.4330017034411
CAV2	8538.81274697543	0.987539956958767	6.71337481135122e-27	6.14363306902788e-24	13.8594454603083	14.1223435338414	24.0802656375713	22.91642007002	28.521614557855	30.5117995192983	32.458680529894	25.9387509876415
CBR1	2076.05620141839	0.702387620878106	1.93945950845328e-11	2.21347733131836e-09	6.82414546832221	6.30566491898337	7.12721056601441	5.57430214160656	11.2282292556718	11.4395903706785	7.65208352692663	7.58742135263889
CBX6	1998.76106079276	0.454187242975814	0.000357826185811362	0.00542677543343574	2.47631092398156	1.96978928294134	6.3938728148857	5.84526521193975	2.9289521787452	3.52606257094197	4.25785602929918	4.19181290978368
CCDC3	567.018190675403	0.484019831227763	0.000788668809144671	0.0101462574912173	0.98969112251925	1.00216372259609	1.73223035280542	1.97359877905103	1.42103116102318	1.58821895214331	2.12916003489269	1.9882934025936
CCDC8	381.342813044056	0.459121870485787	0.00384873680872634	0.0351040599158714	0.811055397814527	0.730062150458123	1.00639563149593	0.939606857715847	1.20665261480112	1.09957711856116	1.0323063725789	1.04011084588766
CCDC80	23582.8006995146	0.369698001559165	8.19300257035466e-06	0.000232847507832833	36.2382896694748	35.5291975400079	28.2188408691659	34.6787456928895	48.6174641599618	47.7646373403039	40.890269152207	40.1941738338455
CD248	3583.4373278425	0.481862496629913	4.91189326204803e-06	0.000153588972228094	10.2511277172725	8.85005157679629	3.50141560233619	3.47634343577945	14.8620638302223	13.1595740685223	4.84428206597351	5.07589227411958
CD36	42.8840520677012	0.644124099234779	0.0029957351063085	0.0288578637223135	0.0386105774411979	0.0279554879529032	0.26305575233287	0.129389664517084	0.0912356693511802	0.109066639710178	0.295391936216053	0.254859248456472
CD47	16167.6244228034	0.413788334774153	1.88952301959395e-06	6.77218863967784e-05	20.9696386118142	21.5742518836537	17.9632146907893	13.7334470465512	30.2803065219636	28.7976975419708	23.3029790129987	21.1383519852879
CDC25B	2377.47141211003	0.418013364390114	7.11320698210528e-05	0.00144016212748317	4.06522681137253	3.56008870100527	1.89394481210051	1.75478764743725	5.3034599336902	5.36450329982878	2.1059017244825	2.15544422280746
CDC42EP2	1913.91388764783	0.491919308360309	6.88493234403949e-06	0.000201083970822617	6.85098768074822	5.97675763308268	8.01426009043891	6.76559659094834	9.40388167975944	9.58460248815393	9.39277265627545	10.3666942529615
CDC42EP4	1699.77239308088	0.327038532687894	0.00333344731564699	0.0312983798234516	4.24092378454441	3.73101405848312	3.48941936916482	2.60506300277584	5.38137044308298	5.06743433440798	4.20427890856366	4.18921323498938
CDH11	8828.49796885237	0.661978975031007	2.44320905944611e-14	4.53215280527254e-12	8.09118278847752	7.91648134424758	7.93797513869546	7.73797401609675	13.4953392452515	13.0863692775903	12.3162694606044	11.970873036447
CDK20	73.1716205147866	0.716312406214832	0.00103347269286642	0.0125878257808139	0.127187651099914	0.157312591550764	0.246767713611748	0.266330942670859	0.384916306575294	0.345445203245889	0.271788879888363	0.228575484519318
CDKL1	274.053250515522	0.613576142025623	0.000444344139662306	0.006475065822871	0.648343412841594	0.553418682509281	0.363590800387428	0.481940222031326	1.10481965719577	0.988427805594026	0.556053724479116	0.569400530348796
CDKN2A	600.891839635032	0.469727514098435	0.000819763117865206	0.0104873143699307	2.08396782706924	1.83159450789794	1.50091655926294	1.28467852799604	2.93376406343432	2.87599982319125	1.79885253004736	1.939481685777
CDKN2B	425.417948137716	0.458455978118517	0.00278755251053181	0.0273710538712948	0.738838486244352	0.703669395802476	0.362898996140241	0.481660854320184	1.12047196229147	1.02801162893656	0.440523064702036	0.398662921938454
CDON	175.86419215973	1.02568565071831	1.30890321900351e-07	6.39406209511073e-06	0.10941951662695	0.0877770093267396	0.04929678655362	0.0395307678688261	0.269767052835421	0.264667457121945	0.111398905738532	0.103556083296039
CEBPB	1375.03117452242	0.535800350687238	4.03397436693975e-06	0.00012974509742326	4.56559682181383	4.08475167821655	4.6564521880546	3.88062369410189	6.93313624351837	6.35098601348379	4.18245851324944	5.15241109334321
CEBPD	1816.15229744383	0.875654195377151	5.11242531343605e-10	4.44166216946435e-08	8.62214273073066	7.46629261107617	4.01226620989367	4.02352183984813	19.4865790532507	13.3930619021689	5.50840646279178	6.75534480562409
CEMIP	105672.378759839	1.16193619189356	4.57146134927101e-23	2.41355576697858e-20	74.4890641414303	67.1076883556634	27.1802527140507	24.4459939333638	202.163003288116	146.921165025593	54.4495877605316	52.5965736057568
CFH	1440.22104173677	0.507344501825165	6.02137641193652e-06	0.000181660294520116	2.29666809251477	2.13040987825226	3.86998776116371	3.1152672759921	3.39698647467775	3.24701981462201	3.83960622415625	3.72412221469419
CHST3	960.15576156411	0.421869819207802	0.000797360299785613	0.0102484689467763	0.971621089249867	0.94219053235102	1.47746845424945	1.73277546871813	1.44345131851669	1.27190921502276	1.47310270907202	1.5203962162188
CLCN3	3450.41342491994	0.34575586639846	0.00042864975265782	0.00629312850773679	3.63723251699826	3.83076792345722	4.47492572811192	4.51896745094441	4.96277485389386	4.94592355230063	3.68885962321284	3.60014915896821
CLDN11	2907.89227227532	0.488806181890008	6.04794689958329e-07	2.42041303471078e-05	7.11971871113272	6.72086840457658	3.10733717381148	3.30620099602399	10.3505110735882	10.0076625436386	7.58696287610275	6.84233302355759
CLDN23	60.1898807042942	0.718058680726585	0.000920795469007129	0.0114648105878521	0.168686741913583	0.0675848330008936	0.149065841903569	0.0883825374329829	0.535055047481713	0.273885019563059	0.144011744911641	0.227148002961039
CLEC3B	527.005511546032	0.637910739051053	0.00029117302832245	0.00459417489630146	4.18000496587826	2.47531909773418	5.06637917555	4.45197576308301	6.498016337637	5.31924241142488	9.68258682246397	11.1236901073351
CLIC2	58.9804246272471	0.885874045432976	5.37701775396325e-05	0.00115509112220115	0.0740762907955532	0.0783522458902713	0.216018205935982	0.234811908408935	0.361840740845836	0.226799685305798	0.318681500889164	0.358648647962152
CMBL	231.996345321922	0.532232994453959	0.00364906515402298	0.0336405086428969	0.394487822887512	0.33413326876251	0.27636298784346	0.305887357086236	0.651877039902163	0.549645632821457	0.379222561027118	0.359752159851553
CNRIP1	934.361946932366	0.376788646456172	0.00218447019790268	0.0224926343061636	2.91314945928144	2.81882540851062	2.89466264623817	2.69550375014757	3.97532940468074	3.87324593409766	3.3255898389172	3.54361677170103
CNTN5	100.483603422005	0.741007906128224	0.000468519312831311	0.00674508689215337	0.0660456709770554	0.065919991819379	0.0743491278955765	0.113133511763664	0.161658201631622	0.146207425294514	0.166644146501609	0.184662942037423
CNTNAP1	4941.87079319389	0.359356093411217	0.000449368029632581	0.00652748671192216	6.72340129452543	6.29029166195717	2.75091253897951	2.75423228714272	9.44579229301603	7.99596761812639	4.59143109603938	4.40337597096868
COL15A1	3019.19584912552	1.01746390290766	5.52247026830266e-16	1.30701636849984e-13	2.88190106891777	2.92221760264314	3.93941265594256	4.87277550971965	7.49107767612415	5.48829382564803	4.6899930690181	4.96884583853006
COL16A1	9637.14308744819	0.602719327928881	7.93551333843024e-07	3.11230833133234e-05	12.3439383175273	9.81999877390319	11.5763347556664	11.8418027460113	20.4136077786407	15.5478236228299	12.7910042978044	13.4465633782965
COL1A1	201130.194883178	0.350635545217032	0.00481640340664612	0.0413395515007444	286.12516986607	201.558802778519	238.224141515371	274.119098455123	357.407487520196	296.572461316625	264.640288768485	308.522336288349
COL3A1	118440.201189395	0.479214776813009	1.07779033740067e-05	0.000291236770895649	148.355275371724	145.441359109781	56.2176978432328	58.2700383869272	244.813005758052	187.036514597739	69.1214858676441	67.9729286313501
COL4A3	41.2243826720063	0.859250380548511	6.79969567998802e-05	0.00139312571043575	0.0147878123307314	0.0146638303835951	0.034813326792596	0.0205593781079955	0.0840820018719495	0.058953002675935	0.0375328768502879	0.0482216210629272
COL4A4	113.637382689733	1.19110491963312	2.25977498791667e-08	1.34869266344053e-06	0.0357014626918052	0.0389104595062489	0.0852937420504226	0.032195974188268	0.177308811230506	0.120016478380652	0.11975704411724	0.113272545908477
COL5A1	27334.2861656853	0.386934785950339	0.00140939098383115	0.0160287572784177	24.9334630500262	20.5114216933089	29.3332072061598	34.3301543519189	36.0491057951701	26.5859778278569	33.086319145503	37.4363320382698
COL7A1	8570.49284584862	0.398695210939675	0.000424544839841393	0.0062529259833721	7.25965181212173	5.92650803532652	9.45598330849412	9.33663281202826	10.0695154125087	8.18494732037441	8.83803278802603	9.26016269916109
COL8A2	233.525691840906	0.575445344105607	0.00210781353216962	0.0219416325362006	0.336710561233929	0.298243788857935	0.292805555358004	0.31308535288714	0.63475471319342	0.465340468678505	0.390436496463553	0.48896438220109
COLEC12	1420.61895876639	1.68687471327311	1.35796141869353e-37	4.66018409860152e-34	1.54733411483671	1.6585412904592	1.09963407752668	1.80115574443302	6.82066002922955	5.30651289065727	2.55030868265263	2.46003262519712
COMMD5	406.73994447028	0.747370405574363	2.55665381226626e-06	8.8400974511282e-05	1.44707347020885	1.21617748279427	3.53702491199183	3.09306719090928	2.65276266790509	2.3880539166592	2.73325422243311	2.74904863889139
COQ8A	164.896687410891	0.640358544044129	0.00140342528699436	0.0159874015888561	0.344659956698448	0.304547797407583	0.609518196237714	0.577601422544243	0.732903694567442	0.519134415622848	0.584630073253897	0.676718039243954
COQ8B	583.243296867788	0.53360572061134	0.000775851334718876	0.0100001044804564	1.77023942009665	1.27329067514122	1.48940476157475	1.74305771412351	2.63976680071501	2.18312011359939	1.71303349290516	1.91881876693036
CPM	308.544541014919	1.11044180350671	6.75386671437483e-11	6.66980779771391e-09	0.201757119586961	0.221641274516876	0.0730036995584831	0.116550549282226	0.586621293674073	0.537950619538538	0.141198197227541	0.149554904049228
CPT2	598.84345713095	0.492423350895183	0.000516783176386745	0.0073129107473691	1.38351479082064	1.20882048817164	1.87503052204367	1.77552889134922	2.0428959966556	1.87604536070824	1.81468032603556	1.95069092043007
CPZ	33.1920812084705	0.728278035807417	0.000408039943680363	0.00603573739967709	0.0510688948079107	0.0181787235851222	0.0572788431881432	0.0810301456603428	0.231485816284652	0.142826878593289	0.12862066206537	0.153720655805717
CREBRF	2990.6444106079	0.44469857423147	1.0533377168365e-05	0.000286320135426033	2.40889617798744	2.34743049853637	3.32780807522711	3.15909609593236	3.57205849963755	3.21333509479917	3.52362232688955	3.29256855942015
CRELD2	1075.66314184001	0.407338953643075	0.00155353569508151	0.0173801014558956	4.76633908928271	3.96541568105509	4.75472507432939	4.50059251484824	6.51211448759037	5.72810955200455	5.17517176857562	4.68809107484402
CRISPLD2	1030.77413060208	0.831399624828549	1.15232444499926e-10	1.09846928170173e-08	1.3198283627561	1.25054768789973	0.582555417018656	1.08497384286148	2.73112430425183	2.26761074006136	1.09601357568745	1.01956587153063
CSF1	3489.89522686154	0.675972355323689	4.22668510802351e-08	2.36815128480975e-06	4.63884120159062	4.16042056414046	2.38471985412731	2.46694147366688	8.6762128317635	6.44096686146053	3.12560167445784	3.16415881685027
CSGALNACT1	597.199781490277	0.626067818767439	2.82229141582938e-05	0.000672597122657811	0.692156310514545	0.827403203733141	1.74901480964818	1.8666905653399	1.38835895081302	1.2033679435355	1.67280737338805	1.67916463785168
CTGF	25821.0670889613	0.37873869661854	0.00214748962620696	0.0221977335082402	68.7392789973405	87.0832794314312	70.6717148292377	107.19839086656	95.5918330573673	118.441235209609	80.8269710022848	98.8377434975299
CTSC	21957.9675450831	0.847076728248008	2.12734574773109e-23	1.21675312829603e-20	16.6109696556274	16.8063086553695	12.8497331541158	14.1660053795102	32.4671692321114	30.9163446562571	18.2962839905398	17.570665133361
CTSH	44.633833752097	0.682986162201723	0.00158081613496907	0.0175849781885903	0.0870447433576948	0.0726862776957268	0.212921870597798	0.32657385313468	0.34100273937249	0.192865641481635	0.181393395323148	0.270424518306645
CTSL	5859.31644068579	0.578427132911502	3.40798395052237e-10	3.03775296680653e-08	22.8552671115823	21.9478314668377	18.1435915623819	13.7756114214487	36.5249446696978	33.6701888777397	21.9106768985424	20.9885561754454
CXCL12	73.5301162712355	0.644268414196946	0.0032924421808683	0.0310834620473034	0.0829934518501105	0.0548650863589863	0.0567239205580123	0.0171647311779109	0.136010296295792	0.194907319349871	0.0976628159842208	0.09632721111942
CXXC5	588.996183982609	0.788983036861554	4.17509630805336e-07	1.77435130094887e-05	0.990730987108185	0.84567688472913	0.952459978382217	0.989915549094812	2.04913834142866	1.53124587042129	1.21238179730099	1.26904434436371
CYB5A	2360.34528014238	0.333124237565545	0.00171055249659317	0.01863551914344	19.7825203208877	19.9189281454866	13.8715968773722	11.5029187123915	27.75087809315	24.5427122336467	18.8353310656015	16.5905748648833
CYGB	555.445386842347	1.34719470098027	3.26133274077022e-14	5.96910860434037e-12	1.14706418105729	0.85879541812105	1.1670630410899	1.46584638196022	4.1254187881754	2.54758950527749	1.51881698718821	1.71097438704518
CYP4V2	566.259973788181	0.574117287761819	0.000301698854461303	0.00471759977420266	0.816658036248297	0.716560146078521	1.80739164391371	1.75464494025115	1.465395660654	1.05534898208701	1.88647707326063	1.81905213093167
CYTH3	6013.36638131505	0.567288096242043	8.58858808629697e-10	7.05961369225141e-08	9.20743917568921	8.52628587260415	12.2319085032262	12.4165074758473	14.2831682582352	13.2698426268175	16.5813589036252	16.5704372910756
D2HGDH	672.073823199621	0.540049379406549	0.000715227291173156	0.00935931842319725	1.99789858670272	1.33082836070531	2.6807405199386	2.22559309752422	2.84733873447002	2.45771290846877	2.63105037282568	3.01612371567243
DAB2	8693.28023845904	0.331106841771011	0.000140089896675155	0.0025170340466752	13.803620103472	13.6986421521359	12.0989885094877	12.2075063255693	18.0490300451807	17.913051424493	15.1192257797907	15.6103091249397
DAB2IP	2299.75223072647	0.423281300012495	0.000376006227270218	0.00563475707613349	2.91040899057311	2.36216658805201	3.09928031999869	3.11778442392112	4.01707758848457	3.42977073636138	3.40405127018139	3.7376123761678
DCN	80157.3975448998	0.648023384724723	8.90549763945799e-14	1.43818548349223e-11	106.947844187055	110.822289096858	80.3281182198602	76.179850991474	186.449311074859	171.775997789235	122.840187857531	117.097824465753
DDIT3	1080.67377179947	0.55820652569856	7.950242004073e-06	0.000227360358312313	6.27653191026257	5.72834816129679	7.27904450239305	6.46966597426804	10.12049741927	8.74452491031821	7.75883182809227	7.26385502877979
DDIT4	3706.07007266925	0.798287599045856	9.15224827118524e-12	1.13182803620324e-09	12.8541771503729	11.9463444582849	15.5546632530165	16.3169613167751	26.2519922467791	20.2271143997725	17.9315327546774	19.5285669444075
DENND6A	888.470945781742	0.563147871138098	1.58262169644345e-05	0.000406339171637375	1.24029759946828	1.2405197548255	1.13223475451874	1.10074151220385	2.12263773123187	1.81386036694004	1.18090533271957	1.10675605598002
DIS3L	854.926704073223	0.368125750697013	0.00445590401501546	0.0388998864637212	1.24806648580836	1.36705300680453	1.10794786310255	1.06068809135301	1.7968967268764	1.78089812467973	1.30913877173586	1.35866937415954
DNAH14	186.881532762627	0.543232267100968	0.00419437569489966	0.0374357575838021	0.0773012764375758	0.0834972114036356	0.120762201035803	0.136921292723182	0.135390081713141	0.138675959272435	0.122448576811631	0.116728238816177
DNER	58.3279422556394	0.989597147299625	6.55544418724206e-06	0.000194355469456311	0.0579411525162161	0.0564473813034358	0.0972663730024818	0.10730405093738	0.255361235375135	0.2334192971477	0.183438207554139	0.143601503605337
DNM1	243.535158992103	0.547388480965728	0.00208378708000705	0.0218019399750433	0.40010490733979	0.358616928387718	0.284086857866409	0.367822102484522	0.628055322100715	0.629410971683977	0.338293790886085	0.332111222349909
DNMT3A	365.955638798099	0.486988917120273	0.00282046877822402	0.0275366820189766	0.396957830277653	0.399051607747245	0.536641931916203	0.74436372505342	0.668978927444357	0.558717464111354	0.514582960664943	0.525464339227049
DOK1	1079.39661245979	0.345774061333443	0.00471907342280301	0.0407413338835326	3.10603049938121	2.70161530350239	2.37179574610246	1.95673231590542	3.96076402086446	3.78877201309718	2.90162168667442	2.87859657805067
DPP4	5695.00763857966	0.493602063007588	6.19378326119249e-06	0.000186043901151836	9.71966977698504	10.0331105604264	9.32383907900379	8.61992700881427	16.2982259283081	13.0571522864924	11.8464001484172	11.9561668042155
DPY19L3	2452.68644933037	0.770195252472654	8.42460094032282e-14	1.37672020366442e-11	2.35546446547184	2.38314451626819	2.64900767330429	2.98563428405054	4.48264465069557	4.12169675309855	3.21139153857384	2.83360509550373
DPY19L4	2693.38960194652	0.728967199832072	3.82272300548497e-13	5.76643062596618e-11	2.60576007870101	2.66538796383299	5.54128475086481	5.08870583973035	4.5917627050368	4.67694539937491	5.6927101408206	4.71866233895937
DPYD	2745.1762533671	0.374165432186626	0.000202030081116496	0.00340061828136817	3.40775471473804	3.56241387692146	3.23015805385592	2.92054212938566	4.75679011569972	4.69352756205026	4.02472186152922	3.9629053681538
DRAM1	5110.06706849283	0.336054402250324	0.000881350300268399	0.0110891801757876	10.2850507772588	10.615858553333	11.2129236409479	11.0731781808594	14.7982664760802	12.7560780031939	13.8806708655443	12.8022670255824
DTX4	2359.79156941401	0.577903710226121	1.6300809784188e-06	5.96696575753464e-05	2.63002593767654	2.60177824211626	0.961492505028506	0.989602169799674	4.69555573193047	3.63837046194117	1.72613565993132	1.81554390736427
DUSP22	458.253173064844	0.64332387723156	3.45608142681971e-05	0.000806830437856364	0.879664935343724	0.733965501667907	1.21153741463823	1.08288150856548	1.48770349893638	1.30196688818744	1.23338949710776	1.17251258119679
DUSP5	4710.66053500405	0.347042217337653	0.000844349817569842	0.0107539283759823	13.8185306059864	13.0620950089562	10.8051507649437	9.17233306145215	16.5073888882417	19.1994389256271	12.9231203182769	14.146604248647
DYNLT1	2473.6465785522	0.507038406170569	7.14660112921515e-07	2.81092818626752e-05	21.4554491897245	21.7113299481275	25.465157204568	18.9522496813115	31.5372595816302	33.005881680268	29.012568619488	27.782777717671
DYSF	32.3140809293183	0.575639540823518	0.00306716037954996	0.0294263387825662	0.00685495766018206	0.0163139646353352	0.03998028625938	0.0407554270278125	0.0255119526777027	0.101004038541804	0.0887325323846744	0.0518294664383299
EBLN3P	1621.04093000633	0.38030255053324	0.000575311544534811	0.0079369865043511	2.58175598880509	2.67771262829159	3.91986945088869	3.84375416065114	3.69583640399609	3.49360129247973	3.58432711291655	3.40646759849363
ECI1	815.130173256121	0.449391201822919	0.00281223727681398	0.0274773934410536	6.02861892964057	4.54396432297083	6.28984099990256	6.05342852874325	8.73024603646322	6.8036061757872	7.09879726896668	8.1415996421528
ECM2	83.5776368565815	0.621447967648202	0.0040759794745777	0.036641106907353	0.110212505501393	0.118607649386618	0.10510807501292	0.122841215969873	0.274245299674504	0.220708048497478	0.263466478427084	0.197191195089825
EEF2	85968.1549042411	0.345022360560225	0.000551509355283172	0.00767806178496156	218.765690854087	175.087571135899	235.168783365915	229.496439936051	262.585323442919	258.656734947784	243.16626791973	259.856748553397
EFEMP1	16908.116276134	0.878638298598841	6.76016268198169e-17	1.85593506271125e-14	30.4728001362803	31.5060831996481	8.09084487019784	10.6609993707569	67.8281478644794	54.3343466393278	18.0092902721851	17.0771012156948
EFNB1	2036.62422639193	0.775910197451409	1.89832924060509e-10	1.74888358965007e-08	4.09610522462766	3.14759412754047	4.63661915095733	3.91109654041775	6.93729367971378	6.42763844624335	6.80132838736535	7.02520688356469
EGFL7	167.420508888404	0.727589851451265	0.000580117109100012	0.0079553122443715	0.442779566445448	0.233655684227612	0.658349958052899	0.496008838186242	0.927536742720947	0.59830390416033	0.828075487348177	0.896456195972776
EHD3	1840.47376239825	0.36115984379012	0.000699515805585712	0.00925072587984111	3.49462582549418	3.262675981084	2.45367108022224	2.87173657546371	4.65061474067009	4.42635535017932	3.01297258880027	3.37497864114778
EID3	435.035251061078	0.858210984672449	5.75158803361453e-07	2.31587149064185e-05	1.30060465924706	1.84498794077769	1.20375980274471	1.44657626756118	3.14081927386897	3.65541274873339	1.53189748889111	1.45115468761005
EIF4EBP1	1873.95306455449	0.518756101427289	8.44961662098794e-07	3.27649399311586e-05	14.6709085628793	14.5517462551586	10.4797278143848	11.0779856195395	22.1107178574567	22.0166570091599	13.992306737527	14.0368333022269
ELN	406.705884042572	0.623347975772011	0.000320014960680118	0.00494689793384683	0.671193434251891	0.574019838936922	1.1300898046988	1.40701720866888	1.29618773822804	0.885691691170163	1.45910255415109	1.49930754708316
ELOVL2	1571.38300640424	0.585577587407793	1.29289031844714e-05	0.000340643097914086	2.3101708856032	2.6381879775952	1.90656419546392	2.07403867219769	4.57010021034352	3.4619927196623	2.49398018694154	2.47944259105724
EMCN	16.784323601457	0.523979363982832	0.0010325613073453	0.0125878257808139	0	0	0.00225241921132468	0.00224923031783871	0.0153311858300983	0.125336390990109	0.0545777025752208	0.0213107402908889
EML4	4224.64979107207	0.507568958139208	1.62771540809701e-07	7.62581891022106e-06	4.96122660735393	5.28200566589656	8.54197400545927	7.94587332234515	7.63355036448117	7.65842375816469	8.39546961068117	8.51710606660751
ENG	2350.21971130795	0.340024804634704	0.00523150546132892	0.0440299665650902	5.57735442173331	4.33398295583687	4.45361396543069	4.68495789374277	7.03194976899725	6.12491963188656	5.04732070912167	5.31780963222503
ENPP2	360.557748738438	0.668343574679026	5.30348088283074e-05	0.00114466795721097	0.588817903821304	0.562840452946516	0.0942657198002635	0.033791068342267	0.941870504911514	1.13181679080012	0.224171392398343	0.209335123869543
EPAS1	19024.3795308186	0.484591784281458	2.20321348308016e-07	1.00811704940804e-05	25.2368458870545	24.9958907132342	26.1771852977512	29.6337941884732	39.4881964301913	34.1088263006027	39.8145618990069	40.980171523164
EPB41L4B	71.9043060622387	0.83821518521838	0.000126836239061748	0.00231835027110601	0.0329058835139759	0.0426699980650999	0.0207603113153373	0.0138206130793225	0.124623979640816	0.107771382996872	0.0260191527274641	0.0277000949566064
EPHA4	1538.74325052913	0.66125599684296	2.48599679669635e-09	1.87501527627752e-07	1.4357160051989	1.46033587850822	2.63722057429609	2.32617856575392	2.40879600081724	2.47059496297783	2.00837533338816	1.85572859857329
EPHX1	290.340411717631	0.687347879269775	5.74505866828667e-05	0.00121326800522417	0.773689866038612	0.675472384035226	0.433000778862749	0.627536206519528	1.32364890758636	1.34774315207299	0.659546597076453	0.594012793674667
ERMAP	1052.1748540419	0.441896318141448	0.000441275836966261	0.00644711377135838	2.07258900603059	2.06746252339236	2.24987204697084	2.49574210485043	3.22059428266885	2.74676491374694	2.80242629770789	2.59796096821172
ERMP1	861.099886093556	0.57258606895981	2.19796382825471e-05	0.000543629720188333	1.13213148854476	0.955910969572496	1.3585895997345	1.36516657234062	1.7947056854048	1.54436954781624	1.54057157497142	1.47076089617294
ERO1B	230.24405722377	0.525838344422782	0.00435639989916394	0.0384567854764138	0.264555250020098	0.311933290168588	0.248285765165067	0.271889251291001	0.51586869447685	0.440129773650264	0.269087668135951	0.272359188141886
ESPNL	25.2073204492655	0.563529522127219	0.00514835162675654	0.0435168859485757	0.0227620987291106	0.0123115962895033	0.0169716190802695	0.0263629197643319	0.0786164418967554	0.0633552833071152	0.0315122048793842	0.0192138662502067
F11R	69.8595534581113	0.615331465923699	0.00495230993222616	0.042153270757344	0.0723049012330508	0.0751129158486121	0.0903653799365737	0.0557717535256884	0.144158378562361	0.195680761093323	0.127413043542439	0.12331312740705
FADS2	6706.35840791847	0.336990167878528	0.000185689422254491	0.00317825274225362	13.1849451516406	12.1034540305999	2.66039185704691	3.02199975617167	16.7061796689128	16.5012778631215	4.08281845134694	3.9359787432691
FADS3	3295.33641207875	0.39435317921054	0.00027388535674099	0.00436151309974892	14.2909649294888	11.720996724499	10.4622937772844	9.31984910964626	18.5149581684673	17.2727155481528	13.9451629865124	14.3576461356686
FAM102A	506.916028576194	0.44004306931392	0.00331734249923655	0.0312316018864975	0.867558761888999	0.731736747261704	0.446681845907075	0.538889163306018	1.22577842694088	1.10748735572659	0.602761036247306	0.699020863218099
FAM171A1	1378.00081616618	0.422592656396598	0.000204355467908186	0.00343352204158588	2.48820385433129	2.3746606923194	3.45995027423923	3.57918539971642	3.33746719057488	3.52387499022052	3.68916015188168	3.64733174825221
FAM171A2	232.862922615687	0.768548659075494	0.000167215955896495	0.0029315114004996	0.617473974311406	0.310531010975708	0.697338384182149	0.828496956952142	1.17780423669509	0.880745773941474	0.899942631010969	1.03513115251385
FAM171B	1836.27444770605	0.384436085200273	0.000856462596702798	0.0108757280896756	3.61792980060128	3.69614322480094	1.6574612092164	1.81773135145807	5.45363378950224	4.59215533705006	2.74197223662623	2.6824912209623
FAM198B	366.1268992589	1.76142602375234	5.17473927442016e-25	3.55168230099828e-22	0.20061328638036	0.226614332882325	0.390486745724361	0.339715147767653	0.90306984001737	1.08643629020062	0.886855430930876	0.780236955011461
FAM20C	4543.88114823805	0.449341912306549	0.000297034450277748	0.0046652081223829	7.26262897545399	5.73643201430586	3.89430638120635	4.26571642373706	10.5866196867145	8.20512989881733	4.6138394956635	5.20068628394888
FAM217B	779.418826653278	0.808929164603451	6.78128881788721e-10	5.79352024361981e-08	0.835611788689898	0.870568627443337	1.74918829638193	1.75016045100866	1.61311747344582	1.66426274488548	1.76449976175866	1.68147026710798
FAM35A	1505.87861491057	0.4853218683014	1.54862149961261e-05	0.000401851178169798	2.75351287810454	2.82414488833067	4.2906118161244	4.1687613679501	4.03101224907704	4.22043773002885	4.15376578837035	4.07555501432185
FAM3C	2685.58532320375	0.520741117851724	4.33620187241441e-07	1.82351317156929e-05	6.83392248640846	7.30469211565598	8.42767369591399	8.04067719406042	10.9382296382183	10.4406927318205	9.58217225181786	8.66927183277492
FAM43A	604.022568292832	0.676750875374574	0.000118995631507474	0.00219845630377267	1.19927277199391	1.07386175098704	1.65958390728508	1.71978963129796	2.66657094437917	1.53599546015596	1.23928934879594	1.47506548725883
FAM92A	1666.26722681484	0.38523798270693	0.00149947990395753	0.0168854476141304	5.12736641572045	5.74278694846188	4.18093866651439	3.92745547798315	8.11903452127765	6.88220186470048	4.23414818451107	4.10095926067613
FAS	1939.65530833736	0.363203226220114	0.002052974460337	0.0215287856509136	3.08956340367006	3.38298442096484	4.57840603711915	4.52520680358461	4.76022698266362	4.00762264025888	4.61079344894964	4.38762295821927
FBLN1	10134.7847425453	0.330101846125309	0.000922761855696074	0.0114735072401631	16.6157466917567	13.758886071585	15.199958780177	14.9902432838088	20.5335015404317	19.2293239129986	18.5458220760037	18.9050931635731
FBLN2	83.0066569539939	0.604104413771694	0.00583212678272843	0.0477654061938895	0.126196464274276	0.0593877272105601	0.194919964761366	0.128465042732172	0.218910601015169	0.196462492673254	0.153091897977157	0.183000381787568
FBN2	98565.1957307859	1.15081498077464	6.98582734694774e-25	4.56640247578817e-22	44.1681541674322	46.2797542609804	26.5464524503295	36.2195301703479	124.991650156228	94.7117952315312	55.382227568753	55.3151941757771
FBXO28	1769.21589359104	0.589281345685947	3.65072435579166e-08	2.088062217998e-06	2.10874041064492	2.10195153924804	4.46393538230986	3.89347283466774	3.32537491814526	3.38019061804219	3.63223744382119	3.35321519731069
FBXO44	569.650197948377	0.531651618898828	0.000301647546977967	0.00471759977420266	1.14010909474763	0.978127100528498	1.17304293791709	1.05038226810062	1.78551480428236	1.53204328817436	1.41956720188275	1.49918508614644
FCGRT	1618.1982921847	0.359845617260736	0.00301856576543155	0.0290573999032811	6.0267391307636	5.00450730281495	8.1062444716842	6.25799465227527	7.96848417017939	6.89772354429868	7.91943254933782	8.24311965132542
FER1L4	727.522580950534	0.598772049467722	6.53805185044314e-06	0.0001942593890715	0.729378516860065	0.655994467797031	0.951673440278512	0.580379331920598	1.13795766766699	1.12140301635938	1.40143177414974	1.31725541493024
FER1L6	375.329721718573	1.0938754629994	7.28906143534209e-10	6.1384629645976e-08	0.263839401623824	0.304141800784586	0.18784119063208	0.164566020984674	0.9064912000504	0.620048216255657	0.287530772530172	0.314977309073436
FGF9	198.574390085758	0.555182217038886	0.00404278753779704	0.0364142680651837	0.286346562499102	0.254823167252817	0.485763787677812	0.750331152072701	0.541384191809213	0.394097309133499	0.690995176539701	0.737746418236216
FGFR4	224.728473705717	1.55837966565153	1.31535505218563e-16	3.47228438487542e-14	0.236388342933989	0.209732085252648	0.21542058699032	0.199076281104243	1.06835079324639	0.857073748429609	0.201307783882687	0.363071568807789
FGL2	1384.69399076475	0.825758200901533	1.7303964295224e-08	1.0604085619667e-06	1.69963953165582	1.9581739411959	5.44771387595901	8.14546392703198	4.3051046550127	2.97052853993363	6.28919743279058	5.98207351853796
FHL1	3351.63789431842	0.462591276716932	1.82208383916338e-05	0.000459130541839237	5.35926654447613	5.74802715051931	3.32773187410255	3.84612929364313	8.69397797210239	7.43301944525287	5.04669675005097	5.06613170527744
FLJ23867	4641.31091719169	0.680371044458573	2.88237920275019e-12	3.80446339578384e-10	11.1977823182072	10.1785744574441	6.06982277380024	4.80529893518794	18.9623999141423	17.1885467042846	9.61727663714666	9.23471247085268
FLJ41200	15.3879391882562	0.549444225745175	0.00137801234522854	0.0157896289340168	0	0.0113338139190502	0	0	0.0731112509833736	0.139429928957728	0	0
FLRT2	845.69219857153	0.667044735456238	1.59237710217614e-07	7.56351573756813e-06	0.530824325256251	0.535431919571559	0.512412883866262	0.477821232662472	0.901844023837077	0.926426018481054	0.741907119577128	0.699409915557043
FMN2	1836.33769103988	0.401597354594615	0.000168939520877909	0.00294667446390223	2.08825445536051	1.93146770934223	1.83102658187932	2.37024479886516	2.84188141138777	2.72131893015587	2.59976619818485	2.75870285572409
FNDC3A	6880.38977030906	0.467498630428861	1.90964847877708e-07	8.82617665595048e-06	6.99165405008744	7.12701484923446	10.2956454786017	9.53647678430988	10.1709736398364	10.2294796149397	12.003719964249	11.2875107127544
FNDC3B	17093.759454425	0.412960500518369	8.9792393835342e-06	0.00025103466195066	16.616982793441	17.2946353879578	14.9056163669656	16.228485740995	25.0166841171984	22.1524631933556	16.2932705589271	15.5969089076598
FOXC1	581.22126245669	0.405930889703467	0.00401582989263741	0.0362583784623834	1.24111184772371	1.10734878133189	0.901656014436725	0.90564485962062	1.68682161102756	1.63035494642441	1.09701394984544	1.07642456562599
FOXF1	6545.96651472072	0.368795147350269	0.000112546021395761	0.0021047945990458	19.1966972788929	17.4098529810302	18.1434424716916	18.312684548019	25.9423374273885	23.3305320746165	17.7603364792961	17.9238662976165
FOXF2	2024.97867624315	0.399518948785493	0.000463353639536371	0.00669521622096396	6.70223785448858	6.3399085190969	5.10572660508119	5.64792908683155	9.86253361812677	8.22417192194527	6.70825391115048	6.43927205527732
FOXQ1	39.730955368799	0.633493424120788	0.00318276417354131	0.0302171404233348	0.0688439939295283	0.0682668015615753	0.0862640620244028	0.161842418620993	0.273563161388571	0.168788624142724	0.101563333544202	0.117003011932433
FRY	3324.65616898829	0.340357334251351	0.000601677683075854	0.0082099697371593	2.18145310584	2.30565118592176	3.48719765080189	4.85426563180176	3.02833031909196	2.90405230623228	2.90235551831124	3.04244870692233
FSCN1	5854.18868821571	0.435621795445378	0.000532467429264119	0.00745834734847813	16.9120543341177	12.0790243449723	15.9257872302963	15.3944576372063	22.393237361771	19.0800406393666	17.0402371860325	19.6309265227665
FSTL1	91433.137585883	0.350874715979937	5.9564398038636e-05	0.00124830609446772	170.027460730499	173.70718546688	122.627850265081	111.246725145611	239.390266889278	216.805465921249	187.848498406734	179.642371329828
FTH1	37486.3489118225	0.423974082980953	3.55701050615247e-05	0.000826177381014467	207.915832191581	217.945589759094	193.113767218087	210.897214019092	330.573264926399	268.842071447417	239.710537444071	233.394726142478
FTL	113374.618316292	0.54041613291234	6.89755916918943e-09	4.64131346644428e-07	890.076488698082	843.884554615226	598.072010343596	526.561407308804	1427.15768620655	1217.70007422407	825.581801240784	794.539231246201
FYN	1343.47430960658	0.421350684975691	0.000468770517601393	0.00674508689215337	2.40441778372817	2.41999735156388	1.73602479451164	1.91004723701058	3.69459774284036	3.13302173639052	2.81871469392448	2.69253810709217
FZD2	4000.33357933065	0.617825676448447	3.29899935819766e-07	1.43308114525251e-05	7.71805121692999	5.66012269699068	7.57394213899201	6.79524695017605	11.4072347542314	10.489285013621	9.49947751974424	9.65551366778782
FZD4	1044.27327924476	0.441901666828963	0.000701753387523098	0.00926246995243228	1.0080637068583	0.935825994891897	0.854699265282908	1.0421983388004	1.54855551545574	1.25759144884421	1.02547976889731	0.989896102464328
FZD8	392.482493938329	0.67616600325786	1.55536371561766e-05	0.000402080559779353	0.751644171010245	0.737060757537931	1.13591353099022	1.32335623674503	1.36712156392844	1.29149153427179	1.13749267686507	1.31691401621126
G6PD	5855.74629344272	0.660683681054423	1.95112374946836e-11	2.21347733131836e-09	15.8538342644785	13.5361429567709	7.27802859835586	9.3677709080989	25.1813066126904	23.8082856926259	10.9387207919026	10.5332291969089
GALC	2313.51743756936	0.410326492951469	0.000217128395526489	0.00359966362970063	3.93997494693108	3.84914929257245	2.29398948398457	2.24424396606912	5.90915551722312	4.9705031278196	3.04377869501301	2.7799226793836
GALNS	1424.09464991803	0.436127514983633	0.000753787623308096	0.00977076742695962	4.32632400755897	3.43464149975247	4.23289409403825	3.88569505678297	6.04099558757823	5.08387597211809	5.27668827547939	5.3683254511624
GAS5	4572.21340337873	0.44256065277771	1.40644886354922e-06	5.23206600269382e-05	50.8534556776719	49.6495293308868	54.4142212956286	44.265696116435	71.7462412117054	70.9065037898454	57.1622670822387	56.4607624786861
GCLM	2026.15899978362	0.726366710154584	1.12449456213778e-11	1.36601211101463e-09	2.39276247213168	2.49352434633538	2.38038962827478	2.23916920627572	4.46112613453127	4.15713297190033	2.72761096580368	2.6012558298602
GCNT4	1222.75779911824	0.996973305835334	9.68848523965449e-15	1.89991195549624e-12	1.78304391480758	1.95047152971519	1.82336678386645	2.59067713955674	4.53022040012249	3.73427398035221	3.31012692573924	2.99303498239032
GDF6	283.024066431962	0.819230137575006	2.58204581240216e-06	8.89651432790967e-05	0.464096575356326	0.374585921359198	1.17535473721587	0.715345664429638	0.866119755245681	0.875170875306266	0.842350720533263	0.828567735379819
GLIPR2	1500.82739807149	0.394090134606358	0.000374918929806165	0.00562460344202101	3.77718979312089	3.65072753161616	1.60633727426685	1.669838153565	5.03835133150922	5.21011016034063	2.67100784234447	2.57011124803
GLRX	1692.40755082534	0.398180897783311	0.000219598952330531	0.00362747872279325	7.1676049196995	7.22487571580891	6.66345890994152	6.58830626062557	10.036918423464	9.8693001328265	9.29765704350737	8.59755784197837
GNAI1	1489.1355592698	0.370707828379809	0.000976346561736604	0.0120416075947514	2.94183109703317	2.89721085872301	2.87595401802403	2.82110413695144	4.14272959780047	3.78093039736274	3.24715591167105	2.95580707227327
GNB5	1634.92255657172	0.32618894970342	0.00258717885035192	0.0257522010185642	3.76774681863808	3.72887483406621	3.73473416267044	3.21099055870088	5.00065860626273	4.82763386533296	4.62326691435119	4.20867314839859
GPNMB	165.953328392604	0.57411380418058	0.00320698201323893	0.0304021008948417	0.367955093910493	0.360100591046265	0.450377165867002	0.799901709058445	0.68806179095455	0.604012516028439	0.722403055986383	0.712981107102366
GPR1	95.6841303742062	0.72093402341649	0.000709428652447838	0.0093093634693499	0.180734968214237	0.186687161345864	0.312250750342156	0.205588138712035	0.432076206840746	0.417899816372659	0.559068134453512	0.471986811807436
GRAMD4	285.161427715529	0.573444332625736	0.000885213180785528	0.011117402866096	0.41779028008692	0.38049809410463	0.751338322521086	0.785327865922705	0.716789277104133	0.622990385574363	0.637927039832998	0.7015757113561
GRASP	279.320722894489	0.599806281676843	0.000577327828087575	0.00794610426647656	0.840259062750401	0.811121475180868	1.74899166275566	1.51480532082905	1.55100160437612	1.29727520954489	1.43227343683698	1.48188158275381
GRB10	1970.05352358015	0.799186447111922	1.11491244956009e-13	1.7391367267172e-11	2.27513758023194	2.12416209473225	2.11641851503271	2.43009128579951	4.28176250503772	3.89582381395811	3.15942345650956	3.05427482328928
GRIK4	64.9987864924819	0.81577949714365	0.000202149378421828	0.00340061828136817	0.0490828891582024	0.0345409759011866	0.0245289238422725	0.0316983721752662	0.154680887946475	0.110587114486494	0.0494289584978103	0.0346536890888424
GRIN3B	61.5344213505436	0.612179662822926	0.00524465811638358	0.0440667809088171	0.0821115702512488	0.0965015012625986	0.12194231017043	0.0811797791114609	0.294746253029311	0.160035571147135	0.118097294244863	0.209768871817905
GSTM3	1841.64614171665	0.544833511389684	4.96378997303161e-06	0.000154858965817738	2.83844479248099	3.03841233617315	2.56904702477181	2.8396989657492	5.0033238586264	4.12918001386323	3.19036296815969	3.37384557227798
GSTM5	308.637206473161	0.940123717951349	1.43494526046326e-07	6.88723552111161e-06	0.934253010454566	1.04196010561785	0.289586508156616	0.441476157032549	2.68560019680559	1.97017780769583	0.759759259641953	0.817741448287005
GSTZ1	187.884004541025	0.65075378302931	0.000701270934952506	0.00926246995243228	0.715062672154865	0.724246357691101	1.41088222225101	1.57604056369647	1.51067744635468	1.2114016475311	1.24878247804397	1.39665696636505
GTF2A2	1053.85545780718	0.344608523108002	0.00415017761116203	0.037186349914113	3.87778471853286	3.95435889045435	4.88250335607562	4.35158608965471	5.33758502950921	5.1261893406828	4.55070274896653	4.41528972345955
GYG2	819.718249130203	0.410292470831163	0.00209741202715869	0.0218944295793212	1.57239200531256	1.78361848760367	1.60165648923664	1.74381534642442	2.44742286408758	2.30867842032191	1.94023940533011	1.92588832109814
HACD4	925.910850497097	0.42163285315676	0.00119254413309773	0.014068079570163	1.41186386734251	1.49874654428322	0.971158889735023	0.886051726826252	2.22621724608446	1.92019394279215	1.37135684960316	1.42710478083302
HACE1	1118.52614117492	0.460885650415883	9.87193478768276e-05	0.00189078214151872	1.55636190196119	1.53997709383448	1.83405569634825	1.74634616265181	2.22093728558759	2.28869438907728	2.04119016144955	1.92790582359231
HDAC10	635.287888181807	0.458108355772912	0.0027454245963448	0.0270347513873925	1.83632004151522	1.3480202049485	1.84817405612149	1.59948314783866	2.53022992971889	2.18737861680391	2.02995544981941	2.05675298891869
HEBP1	1159.30673649384	0.385413250249386	0.00163274092526711	0.0180310818030102	6.39323767425879	7.14232934500039	5.25407733159783	6.23382871668593	9.35040520553767	9.34927373071383	7.01896799470546	6.89172025352347
HEXDC	313.717213551268	0.594084571259804	0.00130534228786553	0.0150955632565544	0.984941286872274	0.727379886980893	1.30997656708855	0.991857898106665	1.77158618030208	1.21829512481496	1.22966816589449	1.54189842605133
HHAT	163.703678306209	0.739413370133726	0.000172908505225125	0.00298555352355383	0.206512433708532	0.241408520098093	0.376389369612142	0.542394529960589	0.495979533310548	0.448186259747958	0.391193561249264	0.394195321298861
HHEX	1477.19027844711	0.703611893326574	7.64001474688213e-09	5.08996834957011e-07	4.94082121569655	5.31752394306883	5.14874604360049	4.28282649461113	9.77728181970903	8.23341120939066	7.66670088609702	7.39659104901342
HKDC1	127.304663649044	1.12967861455208	4.54919043017865e-08	2.48791781016185e-06	0.121716843767212	0.144835634527477	0.0838066023605321	0.0615352588310848	0.469768479666845	0.429595276783571	0.160643053001009	0.154277903865366
HLX	260.64734128541	0.532336074055774	0.00306183438143945	0.0294120367767805	0.819095821431128	0.642833228093486	0.76639997382555	0.573986199389176	1.2803601263681	1.11058606327276	1.04391856131664	1.01097276885604
HMGN1	3840.01014172072	0.360990900183564	0.000140656655205399	0.00252390624993977	21.5630515422651	20.7398364828509	18.1930058842877	15.7509838941916	27.8490255788464	28.7796506249104	19.3901749700032	18.4730125730131
HMOX1	690.098835533454	0.846629620512044	1.80835529622731e-09	1.4024459407521e-07	2.64826932591695	2.24024593615037	3.02528657382785	2.34522765641877	5.19659221740897	4.54526093382332	3.19194456252091	3.45457719400504
HS1BP3	1047.09833673937	0.394107302409742	0.00234412859889592	0.0237545695892332	3.40076760181518	2.73678354631067	4.54083213788651	3.56454488896034	4.40429942594019	4.11193881698204	4.61293699466338	4.75887065469004
HS3ST3B1	1818.76305651328	0.536856039594665	4.26977472776068e-05	0.000953091130146986	2.28017522977383	2.15600623556776	3.67256827272088	3.84336661311041	3.98573000461966	2.9135569573159	2.99682819080993	3.34321679396269
HSBP1L1	513.895667751511	0.450350569910893	0.00238265006985218	0.024031328074108	4.76286845402352	4.55583051341277	5.07996513761777	4.79835101378382	7.38577833206875	6.33910790421837	5.07519185440824	5.10012133788677
HSF4	217.077380909671	0.763350362032718	5.79147097467732e-05	0.00122119081519809	0.518341629618754	0.393055627707565	0.576562534421521	0.534126046653816	1.04315675182514	0.842369051765375	0.690690236038139	0.700203150365699
HSPA2	1441.06601941667	0.444839124313633	0.000262661362818147	0.00421209407407091	3.79447974639926	3.38270753891652	2.89636707334628	3.86837911939732	5.62425922516085	4.70274553324558	3.87150709770601	4.24218237447329
HSPA5	19835.0010397754	0.366445519307226	1.71421238445235e-05	0.000435759137062544	35.5038556183613	36.1881541272855	30.7261497272845	39.9404299450632	49.0147201976222	47.1378687818611	34.1547191607807	35.4244240600236
HTRA1	6074.43074169041	0.410513619942413	8.12176551020156e-06	0.000231301815681612	20.6292022313282	19.7234985961906	25.031529931275	31.0352427730709	29.1432482080253	26.8122360633924	35.1603683789962	34.2190438560391
HYOU1	5673.00830309536	0.421720295234316	2.99811414483131e-05	0.000708349619037856	8.49920593873689	8.59136300550713	8.6836151457712	10.4487496955095	12.968053376317	11.0214487610198	9.11809313973572	8.71206448191164
IAH1	1617.97290112274	0.642069421509163	4.4385253970015e-09	3.14059990333194e-07	7.78889102335894	7.96733090892381	11.0530198816858	8.70267727284682	13.0787938647662	13.0672039818631	11.4694989080667	11.2487392957858
IER2	1658.22819248505	0.447762643597031	0.00123375157928287	0.0144379436733298	5.18898986209742	5.86443439682983	7.03086601924645	7.74578489161771	6.85924260225671	9.30421183341241	6.00083559912706	11.3692975719388
IFITM3	11881.2325718763	0.34838901662091	0.00340354161877784	0.0318258963221821	147.236375420175	108.927487096537	174.877217256055	113.284296463801	184.703138338981	157.380095775135	195.342294675906	190.390669103741
IFNGR1	1425.05604399996	0.598773717253486	4.6486733496411e-07	1.93958477418004e-05	4.18890941954873	4.44937734540977	6.95701534416177	6.5202849270685	7.45915343566288	6.51617493848317	6.89158988816734	6.78324961678279
IGFBP3	117881.01777609	0.554087129499312	8.30482154458424e-11	8.08512662003602e-09	309.29002744802	285.344880880683	294.062826552747	272.33295871386	473.646680936911	438.890177780062	465.575622938174	437.162456414365
IL16	649.329337358532	0.647163919042676	7.4992235676674e-06	0.000215810989336206	0.461815045429514	0.501443804599819	0.501533276236709	0.708410820629906	0.906302177167212	0.750927231437847	0.516526978677443	0.525298151290894
IL18R1	231.70594262768	0.555858288418842	0.00258891508746402	0.0257522010185642	0.410609382634383	0.369022640609075	0.376633813567007	0.556824248744	0.738692139746434	0.580308749665155	0.469996314463822	0.404045621960323
IL1RAP	1336.28983879562	0.634295359345632	1.46098881716894e-06	5.40565862352508e-05	1.2056429065749	1.18008127546754	1.02898396078742	0.938569353029623	2.27382568145572	1.72827386028818	1.22113798369259	1.18017357053074
IL34	190.368808829941	0.648127881229901	0.00187236667638692	0.0199859855107023	0.661041053213588	0.447322045443577	0.569202901791407	0.573133686993688	1.45286378394617	0.791835697068965	0.63412353439078	0.769833283480318
IL6R	659.435835132613	1.94015603705526	1.99348239068983e-29	2.28037773141661e-26	0.319176852663185	0.213010098490189	0.177289580134512	0.225908604652262	1.70639017402823	1.16772581118549	0.489532622739598	0.50603775492727
IMPA2	752.434534169801	1.42916843941439	2.19858233072021e-26	1.67666331409979e-23	2.14882451432875	1.87974659010319	2.34868412061076	1.70141907899615	6.21638065526935	6.29210038622925	4.35489855396591	4.37455392078412
INHBB	1162.83788198173	0.626370849816965	8.95218047226427e-06	0.00025078894151586	2.69299097041787	1.87700689148491	5.56078379344485	3.98430810651603	3.84290403807341	3.80682475687042	8.10251840703961	7.55111109883937
INHBE	478.973627238729	0.743851577918371	1.77370478956477e-06	6.40727517009357e-05	1.13792185877242	1.13239704280653	0.49819691886197	0.421332383392641	2.37997838243958	1.89852115833484	0.712274305914331	0.606990185854019
IP6K3	144.052281536392	0.71385594357711	0.000397291719635973	0.00589580911939784	0.307507135743538	0.250018394613862	0.19970492882724	0.258391122108949	0.553585876444101	0.608725775983481	0.425228349356814	0.482914533425695
IPMK	1348.40102134029	0.387302399793699	0.0033286182066371	0.0312744299264254	1.50655449515231	1.58749532667692	0.735388245986368	0.541877101301165	2.43460693356608	1.86173678574853	0.982372563013319	0.823314012178065
IQSEC1	749.148551918155	0.704653844120492	2.85931772349375e-07	1.25800815353842e-05	0.637281210352802	0.533410205016375	1.13340713787303	1.34966668780826	1.09382907740995	0.984680176658006	1.24148145826119	1.39667545484784
IRAK1	3502.80379428354	0.865870653334366	1.54048522125404e-12	2.1359839022378e-10	6.44062336410561	4.66967098399408	14.9954559846478	13.34517392678	11.2223657755472	10.7365294319286	13.0420729812522	14.0714056567421
IRS2	1378.65550467256	0.431517449838613	0.000836726661655058	0.0106844157065479	1.54276630930469	1.18766968035408	2.16605576816923	2.35675421928565	2.05296939827755	1.84443272228021	2.30489984026846	2.63463894664773
ITGBL1	10437.0940051633	0.345506558140533	9.27112543572072e-05	0.00180261669767901	12.7260042534048	12.7528816289343	8.35649123783617	9.13121795788659	16.4560543506777	17.2200930929735	11.8079358442497	10.9541080630249
ITM2B	7745.90288461758	0.421473180658877	2.59246233861623e-06	8.89668263054625e-05	28.33963146272	28.9213465999343	38.8803183539274	34.3761946038917	41.0450685519277	38.9829677844754	41.1335907184844	36.3944343697613
IVNS1ABP	2633.53503848764	0.367858295729765	0.00067561208347351	0.00902943638090374	4.6504156838307	4.31687940415291	3.84379710219313	3.96305668623844	6.53521415975801	5.57941606756338	4.15072098504082	3.82505633046936
JAG1	3121.82864372392	1.13169725902738	8.67079455861245e-30	1.08203633550976e-26	2.65659825188519	2.57813504260499	2.8082490800838	2.3659633802003	6.46108205237461	5.89203407233919	3.81465898527428	4.06110134430453
JAZF1	1832.82566228798	0.785767066289812	1.49398199163673e-12	2.11421554630902e-10	3.38736822069236	3.38783605769231	4.29495083278959	3.79687538072002	6.65546953281049	5.86419468046731	5.8234751629949	5.50483831998079
JDP2	1837.89744738488	0.585819326586568	5.28058592196479e-07	2.18144924948469e-05	2.93692561386583	2.63912922052343	2.87002317838157	3.27811425591396	4.83848001009574	4.05863946965851	3.72591344925019	3.80903113717331
JUNB	1719.95496594127	1.21024159256614	1.68978975253452e-16	4.37655545906441e-14	5.13739064212585	3.55240173318706	5.45781268070943	7.98012549438951	13.2704826036531	10.0462714334441	5.41788679094895	13.727571347599
KANK2	6364.92410411829	0.399701581199601	1.78984864703775e-05	0.000453307239444413	8.95729166034084	8.0442739047626	14.1732972949831	14.9239065172103	12.0340682543676	11.3488215548398	14.9384903882413	15.8312673246425
KBTBD7	267.243829388344	0.549400048496934	0.00214467515578755	0.0221977335082402	0.61064568322121	0.457785972932235	0.803168637133427	0.731376380602103	0.890795700969203	0.879394316080615	0.867611520474407	0.789126215324735
KCNE3	27.252641209206	0.799832474169043	7.4776745301317e-05	0.00150950056286938	0.0162509387136173	0.0150403771681467	0	0.00690130288293205	0.173882239679616	0.0964014093985565	0.027222644482285	0.0172450931704973
KCNE4	703.625242218946	0.765785469981095	1.50250045018756e-08	9.37491985442032e-07	1.34507612170989	1.26316159311478	0.910733606691476	0.809348160772129	2.55609075034315	2.30026446576561	1.36397725353043	1.45904351273223
KCNJ2	1642.52929538291	0.41345043363995	0.000239514814186265	0.00392341271400341	2.1415997556454	2.12731857416285	3.23978804073337	2.99636844738758	3.175900617355	2.805915775722	3.31495406639174	3.32364671069484
KCTD12	1672.93534009369	0.452266065310341	5.27450358106631e-05	0.00114020646704405	1.77739984724208	1.9110914573518	0.626903484548761	0.56535547827368	2.73760697875196	2.58837936305908	0.677290601829286	0.500818298215837
KDR	86.1865364038473	1.52315845804131	2.32598971013665e-12	3.1302804657888e-10	0.00659162765989167	0.0152515137592768	0.00600694722121733	0.00849779397098557	0.116271092998467	0.343718106891548	0.0953620210285523	0.0382532052264644
KIAA0930	2454.5166896113	0.436926420161993	9.4489459930344e-05	0.00182684058656878	2.76935546443147	2.5369515820149	3.2138010122604	3.46206680699513	4.11721151676611	3.43966268875241	3.42288299770124	3.39398389017468
KIAA1456	352.28513291428	0.857563660876531	1.25758001172507e-07	6.18738380679214e-06	0.203390045914553	0.180593588933163	0.250766638118355	0.174199382122108	0.402749432193891	0.399693229131679	0.44106727603115	0.368978308686202
KIAA1644	222.318168827158	0.992440549900618	6.35538110589991e-07	2.52870482436777e-05	0.139139471709707	0.159500606919539	0.222570493807955	0.461123802033772	0.509569180297275	0.305907052176478	0.313326026079903	0.322005618954234
KIT	1327.85368110418	0.813065127888871	2.96168658675279e-12	3.87191159774815e-10	1.58461722880069	1.40438567047483	2.06946933298043	1.51511141015975	2.78908584737093	2.86257921970346	3.17789566677903	3.22068190610997
KITLG	2866.70957263847	0.528792429867189	5.99956113692938e-07	2.40806946569092e-05	3.32724758622859	3.6865483832627	1.93788333145261	1.47637816863984	5.24057949802604	5.4478254236408	2.75819271918519	2.48395638472099
KIZ	664.307264503904	0.438000271045889	0.00120976456558927	0.0142022109830671	2.09181137182548	2.0607749679443	1.53824560458199	1.84713530822498	3.10304351563019	2.900088813657	1.94863220754007	1.98022526773504
KLF15	51.5628325828926	0.965173693252518	9.62674998301011e-06	0.000264481710144071	0.0711308414506527	0.0444105960059733	0.144047783859291	0.110280282107798	0.34622750906733	0.230636754239127	0.102304217139907	0.125803808396261
KLF3	2880.63380346685	0.463729014279546	3.80043122712863e-06	0.000123622084016101	3.44745648408056	3.59711637473137	5.77969285395978	5.52301235133601	5.21507589909315	4.98340430303513	5.63967336453724	5.64310738486302
KLHL13	250.422892549339	0.522781319436406	0.004427538699884	0.0388151692820985	0.341112929600722	0.326493710027135	0.152567388525465	0.113628744404891	0.473795700012143	0.624709934362913	0.259733136161154	0.241505449607179
KLHL24	1867.22360329437	0.486814304964448	0.000116862609520284	0.00216780140660128	1.73064070230276	1.70847964960206	1.74092548412025	2.57361579984984	2.92019077927865	2.21213837775285	1.63501685651659	1.65716038007195
KLHL29	1605.73965627444	0.347912397579975	0.00178210144986323	0.0192621311828918	2.41208809184262	2.1408067479276	1.82253809340755	1.84019940817716	3.07390426672246	2.98761549214504	2.53900665250133	2.70491694722317
KRT7	90.1305965040823	0.829460436797384	0.000113604829425902	0.00211308061453842	0.263815180174645	0.220909484694813	0.448774015225552	0.592183225637927	0.618192686447601	0.684321744364038	0.388361078665393	0.361607414153105
KRT8	1424.48813689813	0.439253959068733	0.000385145115788215	0.00575286942810101	4.71370495190829	3.98106593868116	7.04156763294945	6.1001989478395	6.73229174798712	5.72810955200455	7.80556201848488	8.40300474791033
LAMA2	686.327203994507	0.627776627885899	1.51522546398425e-05	0.000395427755591478	0.441662687040763	0.443744775585892	0.415621775253833	0.414721063050508	0.840542110084355	0.657995800787426	0.48288454801841	0.519619193941365
LAMA3	361.329323979539	1.07972929646593	1.5546570136618e-10	1.45175352561466e-08	0.16271502189801	0.142835142337871	0.153143832766552	0.170728045744719	0.437082585794998	0.344544105115227	0.313463319563557	0.310780874505612
LAMA4	8903.02350421858	0.65204760598004	1.08605834800371e-10	1.04254006594734e-08	7.6559682047251	7.22565910409067	4.78624080169379	5.09585565324363	13.49670039292	11.2273571435815	8.33456008231512	8.33544267600419
LAMB1	30942.3742137859	0.502980810480116	4.51734353106721e-06	0.000142879204264884	35.5189478725711	35.7841967899311	21.6515203005745	31.7577191690543	60.4323052506034	46.3020555730371	29.6963720198745	29.8559657874101
LAMP1	14166.5621354442	0.381158946392666	1.62642167286368e-05	0.000416527804167906	41.9786315321026	37.6169730186422	60.7442132010258	55.9811060731947	54.7128910252789	53.1466332449766	61.0230262045491	62.0562471183148
LBH	20880.6127478659	0.461395415446094	4.39081567463396e-08	2.42059143637351e-06	48.9292533236588	49.1487947352355	44.8244233783707	39.6707668115802	71.7350998815667	69.0700570895216	78.9239367061688	75.1519501284568
LCORL	883.717734043897	0.449429825979774	0.00037964573303605	0.00567690302547479	0.624588122340782	0.617662088578108	0.610175772283282	0.600629600459773	0.940807815180038	0.860693304265957	0.578323050828779	0.571540743471195
LGMN	450.383064957957	0.941489894026349	1.15375796889126e-09	9.37138203489371e-08	1.11937960198588	1.05843752441822	0.8821271039728	0.84330521572837	2.59306126183689	2.21223541318796	1.39027211649424	1.45743832528801
LHFP	3539.82203216963	0.492593046437428	2.31644704660329e-07	1.0564075949742e-05	11.2496106620027	11.0406683408733	10.2054150206289	10.2667045482856	16.7958762085125	16.0633038178317	12.1533316231882	11.4661589625221
LHFPL2	3111.96544430172	0.412474953463805	2.45440447194937e-05	0.000596311684715912	4.32745908779233	4.33824698662909	1.42207926758709	1.46686152158347	6.20146770716195	5.86246560690786	1.82824131061513	1.86006873873635
LHX4-AS1	291.460160496679	0.527860057737163	0.00220377179754161	0.0225923640514217	0.664704372419458	0.742298694228557	0.804237427055953	1.0924422203735	1.20837311048101	1.0743349366763	1.02368767388716	1.19802934381249
LIFR	6686.75425165535	1.16081065773206	6.03596536847629e-27	5.918264043791e-24	3.12300458149036	3.19066417906993	1.45096675489334	1.32846076431038	8.53000586176278	6.84513588202153	1.92295119738274	1.77865821336947
LINC00476	381.153381858046	0.452851750685993	0.00397008797778728	0.0359481514980778	0.282880804300716	0.278351351460402	0.250848668421959	0.310559167241708	0.426009412605413	0.410147051119433	0.46640983881629	0.483472796619724
LINC00839	815.155994408825	0.43674881484643	0.00191616952833801	0.0202957246261543	2.53562565174083	2.32271427455352	1.8690762154379	1.76273948701262	3.95212341159008	3.08016298546645	2.24040024525814	2.1896725224146
LINC01279	2729.11967639624	0.472139560432757	4.03592602897445e-06	0.00012974509742326	3.5297252383626	3.67918460132561	2.68785066168086	3.8067832034504	5.12079748825981	5.38946938142623	4.05420223170609	3.93795167559298
LOC100129034	3038.41111446259	0.559796905809057	4.02005664197437e-08	2.26161137395009e-06	3.74876608724887	3.2669599568995	2.57094212449757	3.05691782058122	5.44751428402359	5.43194329015371	3.48489016152296	3.53019088309373
LOC100506548	1869.35724241238	0.346475722688659	0.00346339870229644	0.0322537815376006	3.26344817364287	3.65345491680583	3.41222469446067	3.49086245697501	4.33483253557784	4.92351684431319	3.83012657695789	3.85981742086484
LOC100506725	15.2444943989717	0.637593003135878	0.000308247117263889	0.00480166382157345	0.00850645896859421	0.00562342685497631	0.0930231852288259	0.175461696485312	0.257223773513232	0.170915459778482	0.142495342814348	0.191820420410966
LOC100507053	179.348378647602	0.575757624143082	0.00268311738397184	0.0265928897687953	0.217139485775525	0.235141991409865	0.163956978856423	0.195089769164679	0.416889100284658	0.381873970133637	0.273985722648082	0.270198442968525
LOC155060	288.509863110501	0.468810833241909	0.00615642529720231	0.0497353446671532	0.651706953789844	0.564678351058829	0.740933799468058	0.92125735377196	0.959090476524959	0.902016828628914	0.857559595537524	0.868665524644842
LOC642852	1471.28070063853	0.722202414691708	8.05732521352629e-10	6.70320625491366e-08	1.31601984226129	1.18208278240603	2.31608581296788	2.26084783571765	2.35604218216862	2.06126668456642	2.3063173617882	2.19084888819414
LOC728392	2082.76910752942	0.417648630139394	0.000211657876101703	0.00353028877915926	10.3456545351703	9.17205402481035	6.15742768656063	7.42791765884638	14.7060857369852	12.6865029595636	13.0833292467479	12.9873859325134
LONP1	3290.78420334199	0.386064832469574	0.000696065112738486	0.00922286274378494	7.70525968078355	6.03720714236587	8.38923080530579	7.85627422358968	9.74234314310408	9.08327358329935	8.31978871432521	8.40371584329886
LOXL3	4717.23055636805	0.396160873954718	0.000168274360892551	0.00294255051206631	9.10587602793809	8.34677109494626	2.92233030235869	2.34706997260747	13.1162116538989	10.9385255250266	5.28312052569659	5.49030104115293
LRP5	1051.92286424316	0.537652612544005	0.000218859129547801	0.00361961357988273	1.45579630956394	1.11889070958446	2.18279955494326	2.47938390608436	2.2950796643802	1.74778857991296	1.9870408434499	2.22653949412015
LRRC32	199.292732624334	1.20360077085769	2.35744235759919e-10	2.14308683726914e-08	0.204229633307389	0.163200802316148	0.56243353529743	0.479263797147464	0.584674737345139	0.562589857034485	0.712594717208039	0.797827983409714
LRRC37A3	170.935899706065	0.58672219721459	0.00256064680051149	0.0255636353677246	0.163519175748627	0.186920865542383	0.253014965183884	0.287791028551553	0.33016813116735	0.301496604962115	0.24123458909765	0.255313045057068
LRRC8B	68.9811135623817	0.635945316642598	0.00366239807277253	0.0337181343695162	0.0408480982775479	0.0450062502851751	0.0564012923714039	0.0394250090260539	0.0911757184845266	0.111326613300341	0.0669183816332696	0.0591095303685449
LUM	13673.2034401979	0.652245094962489	2.78135327242479e-09	2.07498023753126e-07	39.9830385361981	41.3950841909647	33.8237862660693	37.1659341829716	76.5569783370322	59.5685494763044	47.5459929876122	43.3847750859933
LURAP1L	944.111245907333	0.38596889079607	0.00242707443925555	0.0244076562840007	2.39622205766692	2.55023453119803	2.26142302685604	2.20646344700103	3.60653180687351	3.2402503227882	2.98537374513585	2.86115488414848
LYSMD3	1511.79527036749	0.558847169614768	5.50292742527639e-07	2.24150399901392e-05	2.33883113416022	2.31844837914806	3.75497625217438	3.42866646372272	3.54332410038716	3.72734799567323	3.52783569880672	2.96574533152994
MAN1A1	2782.11996377012	0.53195979169352	2.0044319013277e-06	7.07322280450522e-05	3.51922208161835	3.83022487505267	2.82720997903561	2.46315656565433	6.09593696274565	5.16559179810768	3.11944124110004	2.76849868157689
MAN1C1	1528.48278102481	0.83578269698257	1.33941269460634e-11	1.61281737358432e-09	1.94788562623699	1.82779911556582	1.13050429594482	1.51498755357365	4.0607871463509	3.26250870842463	2.13636249479153	2.07759990575045
MANSC1	128.044172760168	0.594799476527528	0.00482397586838155	0.0413608474361484	0.26498156664337	0.364705059648531	0.277105417905199	0.407163564514947	0.740979504959921	0.507059472750367	0.482911849837724	0.573331778986282
MAP9	753.920872161974	0.609329516761178	1.20090368298216e-05	0.000321341225268929	0.619291331117618	0.681132687705854	0.525909007637964	0.685768980101115	1.17139743704267	0.988413392891251	0.614564508208536	0.554267080284477
MARCKS	9160.91884873054	0.408752589073044	2.74344330111628e-06	9.32159559267901e-05	14.976383553263	15.0185615855778	10.2882433086404	8.42292545981542	21.0660609360297	20.4283950349009	15.6998093179148	14.348309997912
MARS	7090.03437302715	0.326304770589982	0.00103919029160158	0.0126238629493937	16.7795987535263	18.5940412700481	18.5354041811498	20.6927576585462	24.2180306352691	22.0903938983823	19.2194332096047	18.0939629153692
MASP1	20812.0650420494	0.33248666416209	0.000682678752401672	0.00909818566428908	15.065956816663	15.1779115470885	4.31267735921533	4.2584179779197	21.6310796184062	18.0944985548113	9.51713645332961	8.975819497112
MATN2	2140.45976812281	1.39211695573308	8.26476896554673e-37	1.89084139316767e-33	2.35693170853923	2.09910387603773	1.57873953041468	1.47779142500255	6.79401959628727	6.08754728168669	3.70952003029021	3.42475350599924
MCAM	2106.67693343731	0.532165193539512	4.3439120499975e-07	1.82351317156929e-05	4.19845830461156	4.21868908841256	3.67322929631887	6.08431336817562	6.2435316799344	6.59569237130576	4.14994553585941	3.90275685795631
MCC	3202.5602119428	0.322966029088295	0.0043356644534113	0.0383630666074612	2.4498298879901	2.57415793205355	2.43566442865144	3.07571136556478	3.64114774136928	2.94668561024768	2.55576258612559	2.60184133485017
MCOLN2	174.244197099518	0.585323036578093	0.00290879794947331	0.0282821067937357	0.351385303644629	0.313909249724962	0.236556897589357	0.232380980957466	0.682343560458348	0.514899864552017	0.255502796707002	0.331730048115538
MDK	1435.96774475928	0.519173601025591	0.000144129333798469	0.00257612417324425	6.408972404126	4.91879442936034	5.45689038602431	4.4078886880421	9.69475802782155	7.70328062153118	6.12592581897879	6.55095799403512
MED28	1490.77251665892	0.337840045585129	0.00339941753980737	0.0318090010694859	4.77647264837281	4.23219950733616	3.31967263794774	3.03430001440765	6.24995418636543	5.6706848948416	3.06569525820437	3.08775590274319
MEGF9	3416.46055124983	0.733547401768837	1.00722383423818e-11	1.23447871183817e-09	3.25372055548729	3.42241758393858	4.94185671528137	4.34218959441012	6.41718352570746	5.42832926144071	5.52507699926418	5.65230838810981
MEST	5427.99133327987	0.453908620451107	1.4362540461465e-06	5.32850251120352e-05	12.5157187980776	12.4140755939902	19.4798528586511	15.9214427543724	17.2245140135608	18.4874989696512	23.6490224336024	22.647499855722
METTL15	921.505243443601	0.525560670113249	5.46676388727191e-05	0.00116725155843178	1.34441925730204	1.41306172940202	2.48328299942889	2.0801806595036	1.9954422782599	2.26132344180131	2.55317649752866	2.44421176320536
METTL23	561.884451351127	0.404154630936918	0.00550354818723465	0.0456202934578322	3.03054711318482	2.90496752203081	4.4049691990912	3.47026464631827	4.5526098924623	3.85643417067378	3.78437414066151	4.06515098244516
METTL7A	357.056330627089	0.561133501470162	0.000487684917594233	0.00696612993113012	0.671091862063926	0.673248606639226	0.437215830692386	0.647306147985082	1.14335879775994	1.05606739528108	0.831476947867742	0.909704099984397
MFAP2	689.163925860572	0.604910415493533	6.88490896980163e-05	0.00140549143036432	3.83314518138213	3.56221578395442	5.2358424674068	5.35475768918217	7.17636125921639	5.19628336702287	6.19973910338152	6.34722987368382
MFAP3	1910.03358172225	0.934377884556207	2.93317402840669e-17	8.56674040168906e-15	1.8944533325315	2.03218718057636	5.35783792027139	5.02131103829255	4.22714468317032	3.88409972428292	4.77372119928417	4.48490567127537
MFAP4	2171.13246302124	0.796897906461196	2.24165321439835e-11	2.48154626403598e-09	6.53841312374141	6.42809306904409	8.75915751999306	10.4306654760956	13.5793124903748	10.7542019381082	11.812881094586	12.0679596669769
MFF	3058.16455168546	0.44701525213265	1.18390123089899e-05	0.000317410394463875	8.98941494020617	9.46397703047414	6.45758952920277	6.18950516306463	13.7845445522975	12.6263436218346	7.94580177259764	7.77902554768759
MFGE8	15073.5793652052	0.333009053265944	0.000546057990629896	0.00760988633236202	49.4109051072513	41.4111925712285	53.7256388928364	53.7849883176262	61.0747613176371	57.9771375534291	64.2113024656799	66.6632776007061
MFN2	2759.64972315329	0.735862276187443	2.64848823960892e-12	3.52968913253512e-10	3.66524165147244	3.50052730759078	6.29531472335027	6.0586057179917	5.99467067133556	6.69728723545255	5.96338730413857	5.7858034247563
MGARP	472.533439511502	0.42362044575615	0.00584727628766231	0.047803726723986	2.2877292349809	2.54688320041724	2.83180569118827	2.2762518776865	3.76136017313906	3.26546449442132	5.42442010618153	5.07084945577817
MIB1	4878.26343232339	0.549592319661778	6.80262509147587e-09	4.59998200151179e-07	3.30725202987149	3.44948127349626	4.72281783981907	4.3399672079701	5.34689408200923	5.04235698517107	4.80299362633483	4.3157188566498
MIR503HG	404.156378280403	0.47925038379162	0.0021763251693209	0.0224282399393904	3.65608905166205	3.21421771684453	2.41786312777176	1.9292415349239	5.12813780839244	5.29570772831634	3.63447177640425	3.09841228694355
MIR616	44.3139606560843	0.603760947002763	0.00535042842914069	0.0447291906497042	1.4704533598132	2.56907735718765	2.01003519451023	3.18601501512803	5.86345236594696	5.82860270203972	2.47921442620006	4.04034380255098
MKNK2	2619.64348543502	0.627167674677662	1.92684580415848e-07	8.87577595761191e-06	4.86909037138372	3.9298839433291	5.99154102831113	5.57123336324362	7.93272262609282	6.57559735890615	5.90343984836719	6.38351499200927
MMP14	22523.4704127664	0.331354293047536	0.00175495567974723	0.0190286545149212	48.2634612183859	42.7601904483223	62.4847593063549	58.4608933790066	66.3995737865579	53.2487869038598	52.1895843128562	54.761687800296
MN1	207.069330731674	0.880906718713269	3.47513694915018e-06	0.000114396174822505	0.141298858074011	0.13705874974051	0.226242333900229	0.270785977066599	0.364504218531863	0.28175587394058	0.255398162981811	0.289025342294713
MOCOS	760.763134729752	0.576281133925703	1.11010978678383e-05	0.000298657278586587	1.77461204236454	1.82625272246786	1.887292723712	1.52501114750518	2.85118523936961	2.93022105795612	2.51302842756524	2.42677099529825
MRGPRF	3248.7402438232	0.347504133223736	0.00485158540038996	0.0414939020505626	11.8705455196484	8.6216813961662	11.4429417394333	8.724838621914	14.1005584939225	13.2643915162494	13.8473862434085	15.0038353541949
MSI2	3243.02237922584	0.329443384747324	0.00101992554650616	0.0124559768477669	2.84677826145557	3.04443678502487	2.3429160342217	2.48194355437403	3.8493803134164	3.88083302981338	3.31842318282639	3.21578117557634
MSRB3	4997.49534070867	0.518441522819639	3.29073141762228e-08	1.91406229532632e-06	7.22159534977148	7.17306540983749	16.3210484317372	15.8211660754445	10.4988246422457	11.1120742166512	15.6787867790235	15.0056518761695
MSX2	862.615570467902	0.595216338800298	5.35552728953244e-06	0.00016409670335583	2.41769513498014	2.58115292643413	2.02616125326536	1.66277373309909	4.31323870858285	3.83084621307068	2.89727036512013	2.58657848147912
MTHFR	1862.27238305683	0.339024625895656	0.00159953849502205	0.0177729013535288	1.91146768131065	1.72038225797085	2.83950045985193	2.69276855744446	2.4086017364981	2.38960607742253	2.67752960154028	2.60949936464098
MVB12B	254.664642268253	0.507426868610619	0.00534161563040906	0.0446827286767978	0.281924938861058	0.204914014376674	0.1950425105972	0.263718151141256	0.395980603362666	0.385545835231076	0.207922282594321	0.264320594101797
MYC	2357.36090199227	0.369781813447731	0.00172491633233747	0.018762223846273	7.57001144735377	6.63252299594703	5.33820782698543	4.67951005032604	8.75015767628814	10.5233232682642	6.48011067606704	8.01912320941644
MYO1B	8968.21653982468	0.418619689338688	6.82105293669097e-06	0.000199643056848522	11.6378909971205	12.536736977667	9.99007739278857	9.90259418841432	17.2851255630858	16.4866742875003	12.3460879691817	12.1449439198796
N4BP2	812.08945732094	0.552103930343927	9.13310507454498e-05	0.00178645057137675	0.511329116027519	0.569239264953063	0.320590102132264	0.381557706792774	0.953087278745009	0.766135386426764	0.439954885413245	0.442226969019604
NACC2	1829.37608235121	0.731674731006599	4.92682135888385e-09	3.46822957914865e-07	1.77461946748624	1.4265327313703	4.22952449438785	3.98268040179238	3.12756885381834	2.60569896275416	3.77952424857397	4.05087526034862
NAMPT	3931.14627200034	0.499206399964073	3.15900934276077e-06	0.000105251750602129	5.6805988154071	5.90511745325004	5.833742648031	4.90313175199778	9.41012356408828	7.86088526164635	5.09657324793652	4.91170821091603
NAP1L5	377.385348652993	0.511749269548086	0.00124601379809581	0.0145195512788296	1.05235846349094	1.07619027405779	1.4639638903091	1.54006726667553	1.72847323206949	1.60689541887916	1.57969747054267	1.51272242433005
NCAM2	406.563234482223	0.983767316388042	6.72167376655811e-10	5.79352024361981e-08	0.400958286765766	0.425949288961729	0.489008676488538	0.341881959090358	1.02854303617081	0.885593373360693	0.71085032689411	0.681361319402608
NDUFA7	588.746013432408	0.822045620237998	2.27384364174441e-08	1.35121435801842e-06	4.47458101012016	3.53541609867696	6.61805866686266	5.87922914662114	7.89419808361615	7.88702534238836	7.16032108007884	7.72870693893249
NDUFC2	558.619659060575	0.520316543028269	0.000272846385853966	0.00435001433056607	1.46345120095695	1.50848254977865	3.55270578439024	2.83471663224785	2.24436636296994	2.37224739022411	2.79959775674126	2.66049110369998
NEAT1	126462.041431661	0.385923922239877	5.46763861056048e-05	0.00116725155843178	36.8698719222826	42.0858366228762	37.3832891333941	52.553906795206	53.4335920782206	54.3642709031767	38.8014776899945	44.3335573276922
NECTIN3	11514.5475122397	0.385106457455382	2.26225350516915e-05	0.000555526902780983	11.5504146726071	12.3845368335324	12.9184367731484	12.1780894791447	16.4331349813008	16.1714499558127	14.8075869153723	12.8138340099907
NEK7	7356.58164872298	0.35382831632974	0.000294061573673053	0.0046291091993234	12.5812627997432	13.0393060495757	11.8636135469097	9.3094171311469	16.1414238815234	18.0262627963615	14.5847300277831	11.9238999355295
NEMP2	341.172841016517	0.523416499235745	0.00125377556668956	0.014560556010108	0.62277243223166	0.596693984490485	0.655037196948816	0.548420319004922	0.959351482521453	0.976471796052467	0.741585199815489	0.671424212824252
NFE2L2	5554.33645387158	0.640030873277506	3.00005072512592e-09	2.193089033109e-07	9.46580905651435	10.168651045592	6.23115183332175	7.0203894195651	17.8215795497718	14.69319767897	7.97704825343937	8.07837463888957
NFIB	64.9398999743171	0.734639059789485	0.000615082011342431	0.00835963442544311	0.0358728096977136	0.0129352908395217	0.0287283445176396	0.000329743355961611	0.0539422570616467	0.136249836821839	0.0389025876491685	0.0324437523355513
NGF	333.835680947947	0.513513611977125	0.0021858508169609	0.0224926343061636	2.20678142790978	1.93675323915468	2.28842356340808	2.20727970661992	3.03854895672021	3.52205020118488	3.99797055598053	3.74104677881578
NID1	7611.7425501777	0.383672914767022	0.000229992677267689	0.00378533294542131	9.19082463818435	9.19172116115809	2.68878684633374	3.55887249415572	13.8286149150968	11.2919373246454	4.44796995570012	4.46400790139015
NID2	22899.3191107176	0.560742908447789	5.65404608903287e-09	3.93975079513473e-07	30.7331079954503	29.1394512113509	20.9305162458001	20.7419300955154	50.334776752581	42.4764789113668	37.7696413557637	36.9671136661266
NMRAL2P	218.80402485438	1.90880332229015	1.85706834576265e-23	1.10834683401234e-20	0.257974273651439	0.219266915264949	0.24768604109462	0.20820887598863	1.62516497716001	1.32227828993642	0.473534164596785	0.46440733362655
NOTCH1	1480.20220871688	0.620561583803863	5.00452671323683e-05	0.0010887026654929	1.19766938593057	0.79458731406561	1.71971940541234	1.71728468900518	1.92456444107279	1.44444054896884	1.54466421582052	1.76716572027543
NOV	132.388526694321	0.770876670049197	0.000171605359356943	0.00296949774450377	0.272373480308124	0.253605524832265	0.227238009668455	0.154768549466139	0.666272941749709	0.524874833997598	0.376812550918154	0.340940332010725
NPC1	1180.3137372925	0.65160025929383	6.10201454360775e-08	3.19703639847724e-06	1.62294013249607	1.45655282967244	2.32519799218548	2.8047719844956	2.71114975254031	2.46306330964882	2.31052670568305	2.4895812125191
NPR3	127.513926448422	0.816540177164721	9.00398229857227e-05	0.00176943807436535	0.0985067431567824	0.0668571195166928	0.0275292057642106	0.0494027338136214	0.187378693630441	0.213632272353292	0.0700054602802905	0.0635908554435986
NPTN	5219.00366966602	0.673294752529145	1.07705257818842e-13	1.69939088974626e-11	13.5765268948523	13.1549278142388	21.8247214089378	20.294032806019	22.7145395170105	22.1203687263637	22.6534576316225	20.9509874461946
NQO1	8456.26511804311	0.641084016993872	4.50710239483555e-12	5.83669760131203e-10	20.5178702385281	20.4637722481689	10.3796660649332	11.2180691487399	35.4954959195246	31.7562558845441	13.5305928248141	12.4628186002993
NQO2	632.057429335661	0.428870648630068	0.0017668294478885	0.0191290496925998	2.27841904095815	2.09085881355113	2.34952250363382	2.03549186632503	3.13024122023375	3.1408512566074	2.68217465221621	2.61464584566685
NR2F1	1157.53264118608	0.555412530343153	1.55289015663824e-05	0.000402080559779353	2.16111315907674	1.90488377835605	1.79127053284767	2.04217918964849	3.50488765656966	2.8850650185888	1.71078373279549	1.61448853845897
NR2F1-AS1	884.318657649365	0.362918853546573	0.00381834938005586	0.0348732414770637	0.955221893171905	0.913977700108112	0.998506982792418	1.01638033833226	1.30814257559199	1.22660318652143	1.04033425594126	0.965014764687534
NRBF2	910.467923754626	0.520947878310724	3.33886363137712e-05	0.000783462924237841	3.1073230989665	3.25129620185761	5.7351533987297	4.9771219307868	4.96910366757276	4.77593563383862	5.82308911782391	5.07562281277854
NRCAM	45.6533475105409	0.749412255384617	0.000589542905905292	0.00806845011900493	0.0283595289503454	0.0236814828453692	0.0231236018031416	0.0181104817613859	0.0960552686476602	0.0828298065360917	0.0590987008248041	0.0415778293456231
NT5DC1	1109.6723541332	0.456868719382714	0.000168123720392803	0.00294255051206631	2.34384344265527	2.50865223523675	2.11850716638217	1.92494771048243	3.64695972612087	3.42026782134713	2.44026224333705	2.26515456183285
NT5E	23005.3531374254	0.388605618100614	2.98848206367678e-06	0.00010030047258702	40.9621129256856	39.5144395356245	35.8311337730008	27.1556089530569	55.707361783074	53.850049893599	53.3643100436321	51.8118130908495
NTN4	12185.2354595224	0.327364057515334	0.000535694866474751	0.00748065455961231	20.4219714839613	22.031289946631	10.8258487763882	9.45331919870535	29.0771625563108	26.4463951904256	18.1254513342879	17.1917157469091
NUCKS1	16455.1631935892	0.382350758167406	2.17930026077599e-05	0.000540963014098951	17.8274758661803	18.4295809712288	15.2572486693151	13.8065743810739	23.7971569510016	25.4518646631844	16.8336511704704	15.2668163314213
NUDT14	171.43177723535	0.567998310144587	0.0049090032057715	0.0418806009979026	0.919705649334519	0.593520412003751	1.91571961270074	1.52332071242698	1.49976035634312	1.215180519445	1.63401040478957	1.66050252006816
NUDT7	333.476252678875	0.559246109398525	0.000665933836441711	0.0089444948853575	1.68558756177682	1.52221839251243	2.26296787143201	2.09085238775597	2.56132982363225	2.69270107145513	2.93361041430377	2.69503350848891
NUPR1	1797.03841816131	0.729622306005448	1.02692059390249e-10	9.92714013556303e-09	12.2209553788047	11.7026102588109	17.6576008406628	23.8785187852564	22.7683827404538	19.6589724756297	20.6517895246974	20.5137426900353
NXN	2588.12267778821	0.332904181746992	0.00166088706822951	0.0182391974284692	6.44530662039237	5.59870071376169	6.57284360762627	6.13198151029215	8.20996053802891	7.61667883396953	6.91841017591294	7.19455645071358
OAZ1	18159.4103720383	0.32323342828132	0.00315135242784637	0.0300274198666788	126.994467332676	97.1848152374576	135.740794545602	115.694294696468	142.001780611771	150.65590985141	143.067622143754	139.612700441662
OBSCN	1628.80899056201	0.690394542659467	2.35438449461654e-07	1.07015350852984e-05	0.382351186882305	0.314514523952461	0.419267206583604	0.617226417332736	0.692901533510977	0.527230986081179	0.467883042737447	0.509488651921512
OBSL1	1601.25959713939	0.456836770063086	0.000244143890626752	0.00398497406258434	1.67329940503044	1.34645709358316	1.87609863237563	1.9633078506625	2.35551157713706	2.03009976562452	2.0583993137516	2.15863231455879
OLFML1	73.091580573738	0.847196724351568	0.000110181135392192	0.00207185814455974	0.0790546870526019	0.122700345796731	0.059513369192641	0.0271080161466284	0.295815177780221	0.351881801621591	0.115154693159648	0.152736101198742
OLFML2A	3084.91461520981	0.457591645025924	1.58201297329453e-05	0.000406339171637375	3.32504025960638	2.96793509053545	3.48260371696097	3.79863398641664	4.84677036691965	4.22623406668187	4.91165457395901	4.82417561753048
OLFML3	3951.82440067346	0.51077648899302	1.5216723626825e-07	7.25277657032731e-06	12.6461374913825	12.5557202825217	3.73532333038816	3.27309138385668	19.7787842435737	17.9099434170579	6.97554644441736	6.21378331106948
OLR1	591.450149988391	0.470589074686842	0.00161390610213034	0.0178806207134328	1.60220304194954	1.56255274313544	4.27545244407284	5.82486107634635	2.6598061195664	2.08315589828464	5.06405516065006	4.49516212147885
OPLAH	226.286932520686	0.870981953937206	1.86053008492992e-05	0.000467756345711228	0.351497604704258	0.198002938180936	0.322575375570537	0.415976110757103	0.808004552826872	0.539985519663044	0.4768521277336	0.512219053660045
OR51E2	308.319235715395	0.462855945491418	0.00578147216911912	0.047448756205177	0.788214291359218	0.691602754994279	0.326499689627207	0.252135622741191	1.11950066741612	1.12436860147067	0.542880045489223	0.453860201184223
OSGIN1	358.347391622016	0.829401133936165	4.13552033865677e-06	0.000132636186188648	1.21897118542689	0.778633016238748	0.853056173615168	0.805043587843175	2.31696200843673	1.91921196330049	1.04956433806208	1.09159661924591
OSMR	15283.9143157429	0.355242321270632	0.000122106756215685	0.00224686252355591	16.7928160572708	16.6465129379978	16.5685449174589	17.703266904962	23.7700808007075	20.8049672472169	18.3297836269687	18.6118840331699
OSR1	2467.046549307	0.36607558021345	0.000918258244801256	0.0114486202782805	10.2309526456456	8.41774447573621	4.93538585749157	4.37866794317754	12.6177652678705	12.5207885666837	7.96263004429396	8.8051041977452
PACSIN3	628.668904411634	0.485377072822883	0.000521937884994775	0.00736345462212054	2.12815847745249	1.82647220903893	2.1903196554727	2.21553219071169	2.95275197100229	2.98283222695591	2.69718090770927	3.11389678727942
PALMD	111.094173245685	1.66210986180264	1.01331925179509e-14	1.95913146047764e-12	0.0928913238494431	0.0793191119967042	0.123450571165291	0.0833579180645405	0.768248219656873	0.52215118103998	0.191560713253402	0.197661344771812
PANK3	2465.99425008459	0.363175314415368	0.000322851790190249	0.00497953542015904	5.28511042458484	5.15316093550268	8.69568348906564	8.29017662550209	7.22712869532337	6.79864198377865	7.81966571925553	7.20201576687374
PAPPA	1817.41090334562	0.386484723120696	0.00317355647076308	0.0301685662563468	1.12514862988962	1.20741382309768	1.28479264831199	2.07151966243411	1.8569009641904	1.37937612274798	1.50428177934578	1.51358901558646
PATL2	41.0035529784328	0.623237557053564	0.00401755617697131	0.0362583784623834	0.092689980215151	0.0704665272273134	0.118255670214258	0.0899719985693377	0.240754982126054	0.239447217687139	0.194086201952194	0.215163174775886
PCBP3	190.220104531238	0.587091369189111	0.00197730049807429	0.0208948452171407	0.556845890944129	0.603581149100791	0.384018790303614	0.328692951786964	1.08910000093702	0.969564378670119	0.752501629710733	0.635495555705411
PCDH1	22.2655043435328	0.626852081893935	0.00110294523628779	0.0131767878664252	0.00533111827435139	0.0105728436879759	0.0275300584245773	0.0512088789163499	0.0399569883946371	0.0782110535447342	0.0378864813356628	0.0365364095511181
PCDH9	731.403142599563	0.399452358845547	0.0026929342978755	0.0266517008701781	0.696014590311582	0.738783326499368	0.639382623777541	0.734057859485498	1.00113020025983	1.01297095235449	0.760292424034684	0.771844988487326
PCK2	2029.30245205243	0.637770164901749	1.00556063320428e-08	6.54186294407356e-07	3.98882401773696	3.77043904518606	4.1915049769382	5.61269805250222	6.9038405072534	5.92900496288281	5.13530376881899	5.16735413500811
PCOLCE	9722.62555476897	0.520318207910739	5.62180881208805e-06	0.000171109910340427	45.2737518214277	34.9549923692913	30.3362322355859	30.4762678735803	65.7912693821972	55.8676199982677	40.6970367148123	44.0914797317249
PCSK5	210.2860344257	0.543677729342169	0.00519014191554764	0.0437623329697312	0.0916696377211084	0.120660353810011	0.0484821641495901	0.066289287883457	0.210689679570046	0.157404372071325	0.0797712945895906	0.0944547603746231
PDCD4	3173.8233285988	0.489262913819325	8.413801516666e-06	0.000237646611973815	5.51249595030799	6.10753426063759	7.54144974694783	8.41799789320232	9.23651864591711	7.99529262779795	9.38707424906458	9.57953150645393
PDE1A	20.720616512939	0.535855229048894	0.00588459600918549	0.047932070256248	0.00796589204068418	0.0115853547357112	0.0174223529096939	0.00579922899129164	0.0481755526634234	0.0442054332343744	0.0121309158493047	0.0105665088682394
PDE4B	1136.38414791077	0.470375026534175	0.000866313415963501	0.0109805025493361	1.26670457260396	1.36174696583332	1.2306806443949	1.40524167490956	2.26912581805154	1.65029482553041	1.23133846088965	1.35598666900759
PDGFD	651.897254685801	0.497838227262429	0.00101915719522169	0.0124559768477669	1.07702251829186	1.08864220457918	0.958717727504524	1.74189566229051	1.91426537784102	1.41301976176421	1.16256676093472	1.24467096985673
PDGFRA	28642.5437400219	0.324045660649016	0.00154232504425862	0.0173252830462668	30.327341641647	33.0827407998102	29.1311252625792	44.6410427553199	45.2198051464178	37.719784378807	30.3372080401601	30.1243991158407
PDIA4	10677.4236317882	0.417377642859957	1.2848798994396e-06	4.83220448756369e-05	26.1214682210719	24.7271108299519	20.0157250277957	19.8869071381274	35.9516606341545	34.7690299196031	25.3536194672523	23.5568732147378
PELI2	1265.29401506013	1.0394295153851	1.30495452886016e-17	4.07116154946896e-15	1.10886979324296	1.18584803611455	0.614608724913154	0.585044312688406	2.76128928852891	2.43364204983339	0.967039085745112	0.968969269045775
PGD	4903.61652730758	0.706433651256291	1.82261711030722e-13	2.81113090709969e-11	11.8991991290525	11.901813904312	8.71786243965708	9.25734531782662	19.7136346668346	21.3144194331957	9.53803864265634	9.16351397749487
PGGHG	778.371546859064	0.446319658182553	0.00112224111008958	0.0133492233259963	1.74646869147249	1.51988941700369	1.96162072553947	1.6004168448085	2.56620735008338	2.17929912576265	1.94589504381981	2.2700608473635
PHACTR2	9829.015198096	0.415605258200325	1.82287568516343e-05	0.000459130541839237	7.01506944477461	7.09356469879575	6.15564466497413	6.65994788675307	10.5949526705897	9.09079579576009	6.16838097767817	6.20080700268756
PHGDH	4822.02933140836	0.452349421027895	1.9479209950955e-06	6.95426958807568e-05	16.7770336189109	16.3122887094397	13.0551346492549	15.3123202039724	24.8527852264516	22.509717519912	17.4537251259682	17.8565772154926
PHLDA3	2605.70446840746	0.375518488730408	0.000695612321429697	0.00922286274378494	7.10195945609902	6.05203990970211	8.00468791122828	7.61072875046137	9.50899089357679	8.36025432135697	8.85399335510505	9.35725686444196
PI4K2A	1572.92398983011	0.347511722939734	0.00155130820148075	0.0173801014558956	2.77155548566927	2.64197780233768	4.87769637827572	4.31778464320318	3.7139632900697	3.4954191319254	5.00094702549134	4.83651344227029
PIDD1	429.557552076157	0.555837796760911	0.00101404797817674	0.0124284255325287	1.06813184547601	0.756554686438194	2.27627703329676	2.01043055193302	1.64349178059808	1.34252567625107	1.98780098849141	2.35847288180824
PIK3IP1	2377.45024098292	0.434233627592139	0.000127104069010324	0.00232015632354352	6.91969307514199	6.42557128970372	7.11115795905042	7.03377552662505	10.401884890672	8.58174116060528	9.29345637046869	8.98073267934593
PIM1	1689.77240387572	0.757531000360252	1.21270085679038e-10	1.14143008114378e-08	3.44757455978985	3.98601324117843	3.67547172755589	4.09148306981502	6.94828484579771	6.61125478009139	5.69048186715955	7.49724696320536
PIM3	1113.71258045986	0.584287561062186	0.000112972264133389	0.00210712645537459	3.53573702397887	2.44275847687332	2.90487281658238	2.62595134159859	5.50888205391998	4.28584909733842	3.13931631873913	3.64966772151407
PITPNM3	118.862146214489	0.72248809572057	0.0004888843262584	0.00697600327084102	0.083720400253064	0.0913203314764136	0.0775659345158973	0.176921628094999	0.18608277719428	0.198920506047797	0.110494983922197	0.112903391065551
PKDCC	3148.27478994869	0.376694093837919	0.00165843279764423	0.0182268270722677	9.379631166033	8.5057984947466	7.55872891018343	5.72667408996663	13.8427972537274	10.6003999906148	9.86684556304303	10.0920857172876
PLCB1	1040.99628472883	0.457236383293505	0.000169523829381634	0.00295311371309859	0.971917526273488	1.00495561420482	0.563976454999948	0.682029133528448	1.48353580069758	1.39487057912696	0.809622743728347	0.757553589003348
PLCE1	230.592564198672	0.704878483416292	9.14893823616126e-05	0.00178645057137675	0.159084650830906	0.159727703138242	0.124263229992498	0.112113966397846	0.304192266247948	0.307852127685052	0.208564937015113	0.263379416852938
PLCE1-AS1	25.4379118374163	0.640547909729346	0.0013947128905772	0.0159278068626899	0.0283468078697756	0.0655880083895035	0.316447302166029	0.582556509690846	0.252754960140351	0.26443687562521	0.55578979931194	0.686221205688947
PLD1	1858.3171926618	0.620083085660488	4.30401263613389e-08	2.39195066624332e-06	1.98899082498977	1.94987122776434	1.37036661433276	1.54073570934901	3.4746834940387	2.96625756054012	1.82846626801798	1.79367215855987
PLEKHA1	2173.31104448504	0.339023888943577	0.00246277163417346	0.0247099958833371	3.57458963675993	3.86856546158794	3.33734194612435	3.69740254976263	5.26779454189877	4.60921428957266	5.04523408715973	4.49822299038456
PLEKHA4	1085.89735380749	0.404175261513617	0.00524551030851658	0.0440667809088171	2.86752373141831	2.04970352041841	2.89926535130189	2.56824019318721	3.78669411972613	3.14925257562365	3.11740338451855	3.40442359507844
PLEKHA5	2035.39097948558	0.405483909081616	0.000611782769793784	0.00833129174698341	1.40788554085344	1.56749414307245	1.84764170792749	2.03170800964708	2.26071791052363	1.90199699693465	1.7927527510441	1.90481160744352
PLEKHF1	284.398863992161	0.515440799307552	0.00613968048269733	0.0496957131277555	1.20494309242887	0.883802858140725	1.45362768660191	1.2914444992316	2.03311117873928	1.38893206503465	1.60777117624059	1.93701120910108
PLPP3	14270.8501104682	0.722185750205732	1.23826424544392e-16	3.33287319553111e-14	26.5800510803684	26.5067551583717	13.2244563752365	10.0692232404503	47.80118389855	44.3201221232033	25.7578600268576	25.0028176218926
PLPPR4	1235.43220296818	0.809270391224696	6.98081518420415e-09	4.67442195285709e-07	1.45637793296058	1.36601570866641	0.916182054200631	0.788922535257359	3.18117717567604	2.28881053385553	1.69440535802267	1.57340871724192
PLSCR4	408.269224704518	0.743663886293422	1.72530817035449e-06	6.29875139746171e-05	0.638116936490209	0.663413755104262	1.31710813575906	1.12250649268989	1.25805337290529	1.19759601182932	1.62583082891405	1.58798369900754
PLTP	847.683209667962	0.490967111030688	0.000135956601087104	0.00244597151130102	2.66949435262851	2.46470702852395	2.19965953219035	1.72566262914713	4.02826735347863	3.65733613482305	2.72953079340791	2.73162973688656
PLXNB2	13682.2272771843	0.453072585715439	0.000388243519125856	0.00578655677203109	17.2013531236825	12.4418225960381	19.9543983240329	22.9657618405391	24.1510682034374	18.9083374240992	20.909870073966	22.831686699814
PLXNC1	179.595091193563	0.915075424369879	5.94224929188592e-06	0.000179667964823167	0.111758662730753	0.11212545545058	0.0359455120152236	0.070193926805825	0.352724848956598	0.222663370383627	0.0961086953823	0.109003236661259
PLXND1	1922.18696332077	1.14085651107996	1.12819960726524e-19	4.07547263392894e-17	1.5130865414405	1.18557184246991	1.20814478459526	1.41206176444455	3.57939241344835	3.02264440312887	1.81092109615102	1.9197988127357
PMP22	4535.83726904465	0.598790662243705	8.93949026186324e-08	4.53817998701512e-06	13.3526791042045	13.3491119095089	6.72327087946633	6.80630816091237	24.0216372047647	18.9455502298158	9.74752751644696	10.0369531571815
PNPLA8	1675.66703807282	0.323693777963058	0.00466238873233771	0.0403280467100187	2.37363047373828	2.52019534117951	3.04441428371929	2.83377872811468	3.4085402638415	3.01590592740772	3.07845346506844	2.83316022308379
PODN	1066.64773592745	0.465378903327213	0.00121050388651479	0.0142022109830671	2.32150152598127	1.9111258132509	3.03100545203924	3.9984162099425	3.61127215129465	2.66261262465142	3.74209784599768	4.17946213638187
POMGNT2	372.905827345024	0.513923962250418	0.00165299261120755	0.0182107781493147	1.0266956515463	0.880020100939961	1.12773324917423	0.86562133304212	1.39838139204819	1.60234676435182	1.19789898918508	1.32304307575709
PON2	3264.91884445386	0.385360293004628	0.000190729505171052	0.00324429233888851	14.0320469389326	13.990174843236	11.9737543069071	12.0409793588666	20.5059337747682	17.8123197072612	14.0927533771554	13.4036548301073
POT1-AS1	116.900707400894	0.79596474594447	0.000145202450980756	0.00259192983694777	0.153656613977455	0.125386452447086	0.188161551161243	0.292766875427669	0.374166609613134	0.296329055264913	0.26507481387893	0.296177006202399
PPL	2841.63423357552	0.472698640019613	0.000395522715847248	0.00588227553676617	3.56222764930243	2.62138143291109	3.13838797927564	2.24989965435897	4.07164609640147	5.06573758072434	7.18105257269791	7.07716797809774
PPP1R16B	26.9500404996933	0.555906169324631	0.0036368330182972	0.0335502734154339	0.00796589204068418	0.0136917828694769	0	0.000483269082607636	0.0259406822033818	0.0975568181724124	0.0436712970574969	0.0052832544341197
PPP1R26	281.280754176263	0.574885556533326	0.00130905755414245	0.0151131178682682	0.398556578451281	0.314299620784366	0.516229639033448	0.462107834767201	0.668237804276701	0.540058990608702	0.643915998642207	0.689690088229454
PPP4R3B	3001.55876902327	0.678487093031793	6.78485008284048e-12	8.46687609883193e-10	3.28570280900114	3.3998653263086	4.61864924203591	4.82849692237428	5.69927198284707	5.62019900776105	4.59594075230014	4.60733224974441
PQLC2L	105.228868724233	0.604464457199214	0.00464532711179358	0.0402058040754038	0.235417409822311	0.189149218283154	0.0792132096358713	0.0681148037717027	0.359445355766864	0.502465750175838	0.223377495575311	0.168147482864785
PREX1	23.8382541627656	0.517240043835226	0.00551677552928955	0.0456631545031874	0.00902584927196835	0.00895017598492159	0.00137087537405665	0.0022815575639768	0.0198282065493332	0.0834791582532449	0.0274901586482841	0.00897938195953641
PRKAR1B	278.886128705211	0.482338216955985	0.00531866083891031	0.0445914043684766	0.670344398398455	0.565015560539549	0.781932209326886	0.746257396724479	0.964138854541302	0.952440116977579	0.974901031854975	0.920312752680494
PRNP	8143.25633801646	0.460165126867729	9.73406429723843e-07	3.74284315429109e-05	18.5826523492877	19.2658547134213	18.7965287496401	17.9632019651016	28.6829941459184	25.8190093167277	22.3493285587658	21.2711955166353
PRR5	66.0569641914606	0.894164387008082	4.63301450103509e-05	0.00101918894320046	0.0866542495961233	0.0657718464868136	0.222280232571549	0.243383263458638	0.358332566590519	0.208808539474809	0.261480349892856	0.329932357075472
PRR5L	168.120337851134	0.577947418865892	0.00395863043273271	0.0359123758717262	0.288876439762611	0.190969654368353	0.325829489742235	0.326804696319196	0.457140107434463	0.407791377693727	0.331741110047744	0.325079623247488
PRRX2	543.031300192885	0.660064744048115	0.000112261071901811	0.00210232978717075	2.98046437030783	2.02574823510822	2.68830964844733	2.3607908815305	5.18918769463157	3.79248404258004	3.0297504471589	3.72599077126007
PSAT1	5849.25923175512	0.570708534522777	1.19397748765978e-07	5.91686966538116e-06	15.4978632983352	18.3649081565925	22.7768774062151	28.9858872702788	27.6915933820126	25.6148397741457	25.6755522850632	24.3796867172988
PSEN1	3463.32383760269	0.332598887103262	0.00075374294093991	0.00977076742695962	4.10100577249803	4.15598115144569	6.6473085086102	6.03354863209713	5.670892353929	5.17630480041572	5.85101958574837	5.82236396278941
PSMD5-AS1	510.390291791927	0.540364933459269	0.000256483817329966	0.00413545127686022	0.880109421801985	0.870125363387176	1.41015972452695	1.42728942798567	1.47885696301914	1.29201698689237	1.39229185021274	1.39395566175426
PSPH	912.999325566024	0.369722067358955	0.00429165667520983	0.0381304667835633	2.86905028773751	3.23896642536483	2.52440680708084	3.12531827015144	4.23717638972403	4.13336202328311	2.90559490231342	2.75585626661251
PTAR1	6909.75377180763	0.363061655275921	5.36532084583159e-05	0.00115438494123402	4.87834715779238	4.99167280916806	4.47458550366713	3.88826331524887	6.60038647841777	6.62228962235528	4.09700048478697	3.72272079063022
PTGDR2	108.395855662059	1.18037043253041	2.12500819525838e-08	1.28787324736173e-06	0.130297904490075	0.133739004244792	0.212482856431617	0.208021598925885	0.486522142907541	0.508509152669362	0.657935853710557	0.568539905857245
PTGER2	1863.26093484255	0.612357002798285	5.03152361299052e-07	2.0866382065112e-05	4.82394491180504	4.77551484398372	1.98152898801597	1.68069363509901	8.78551655114229	6.92319939800389	2.9464432950602	2.83086068378896
PTGER4	923.61729084857	1.05808209593326	3.91865139358847e-14	6.9858867116609e-12	1.35493925541548	1.36095323064837	0.939372190140345	0.728997904471129	3.62712099459186	2.7771636399827	1.6142382865088	1.55906720101363
PTGES	392.406098907107	0.975394125069713	2.92199695351827e-09	2.16812173951056e-07	1.19491233531867	1.04093501715176	1.45528969101828	1.53961010985664	2.86601162169997	2.30791207467447	3.12491917088324	3.17002834671329
PTGR1	4730.36938746783	0.393262990223635	4.70779197354074e-05	0.00103233003867083	20.8224369372245	21.6281059394109	6.36741639639423	6.19728376944533	30.4459206739404	27.8298520693081	10.8523280813242	9.4360330382771
PTK7	11540.4877858042	0.541533959566488	4.7552150836228e-07	1.97802537736031e-05	18.5243010254856	15.9224637314264	14.7091708576695	15.0348593181843	29.1641327318587	23.746874919635	19.9099305759973	19.9605844356796
PTPN1	3156.41381428655	0.363990029490408	0.00024784121833001	0.00403094360665408	6.38966653574881	6.31294708038307	8.66925422385621	8.10381076342285	8.93324622640327	8.13974766490634	8.08390677721224	8.26203723472236
PTPRN	269.160888062145	1.02721068421361	3.51643913673594e-08	2.0281579844527e-06	0.392998404349053	0.254741236530427	0.325581148300891	0.305767809316315	0.88643269641483	0.791094413831831	0.559618073598165	0.453598876501226
PTPRO	62.0637359757237	0.813088125916927	0.00020912225196159	0.00350503193245024	0.0248275865679753	0.0362812660342146	0.0166713238587805	0.0146658496309259	0.133737290955443	0.0800154992422497	0.0348239576839554	0.0294663898824075
PTPRQ	464.703983663107	0.9453206201432	4.19931243481747e-09	2.98673377164453e-07	0.322871055369703	0.276412414939236	0.437402720824904	0.412392632847064	0.595631822755739	0.746846253267806	0.824187146276604	0.818815880878996
PTPRS	3455.88529943674	0.427253872813587	9.92929449296241e-05	0.00189832068948322	3.53517528127523	3.02475381955751	2.73396939303989	3.23475709865877	4.99550215561336	4.26470113644547	3.05682369879082	3.29944438530084
PTPRU	513.32701444857	0.688609997793349	7.41018838821018e-06	0.000214146644220971	0.608591892080742	0.491212318151175	0.464324239461331	0.500159165672758	1.05759596272603	0.908981923589375	0.579249080932695	0.523322838450982
PYCR1	2362.49656911858	0.352738269055458	0.00169837404346916	0.0185470011891019	8.15006498990088	6.64794768810043	6.26381413913593	6.0560627448132	10.1335352241232	9.62993758452753	7.02893031331067	6.6926795768975
QPRT	60.3723961414959	0.968865838073444	9.91835935012691e-06	0.00027121378246851	0.100958614200617	0.0583987663232004	0.0651691728726819	0.054868766175371	0.417483960850636	0.285761508004724	0.0896849041735863	0.131128504087851
QSOX1	82834.4674117198	0.676177093982721	5.60671841331569e-12	7.06086455592518e-10	167.948237190641	145.070411950031	123.504331623398	97.9793775617334	284.036392289115	244.075162590616	178.875648852554	176.383648939622
RAB11FIP1	1864.69512334911	0.827947704296242	2.53818280295949e-11	2.76520915366865e-09	1.38951318087527	1.34007922640224	1.50817213747727	1.75030077686358	2.97012257420217	2.29921573158363	2.49223474044974	2.38311722789212
RAB3IL1	144.501942018081	0.838557058779276	5.42722973488383e-05	0.00116405597766797	0.337459923356714	0.205341527967665	0.279570064753812	0.341988467995872	0.731429252029318	0.601723012124485	0.3474686852321	0.419653244884483
RAB40B	260.764915092545	0.63697421322983	0.000272550466415894	0.00435001433056607	0.947321633778788	0.847503816032126	1.05973186640371	1.0307003094705	1.62294961379786	1.57395468076684	1.42967774270316	1.38827166687994
RAP2B	1611.21710842585	0.577522988065594	1.06090221364192e-07	5.2956380678773e-06	1.27972713697893	1.21842608524649	2.40376421918529	2.25681428508299	1.99918581220041	1.94500173781366	2.15654952100913	2.30399969009133
RAPGEF3	192.808948129856	0.566282797911356	0.00275674794440266	0.0271073632040224	0.193455585486309	0.166855302945799	0.128090051669032	0.145788418065764	0.298819662318374	0.323916121288756	0.210596704808357	0.18143329525239
RARRES3	210.491186363881	0.699337231828527	0.000254472859162046	0.00410958698554989	1.57823168730651	1.54344322412916	1.15297070136395	0.898123056225306	3.56991421735714	2.58326509208048	2.00616170519836	1.74744641809676
RASGEF1B	62.1730012394416	0.608367939573867	0.00545651478335884	0.0453399385176555	0.0875860856259913	0.109121440021429	0.0644677054282486	0.0337209894410073	0.34477311064678	0.167601674940489	0.0795156551279559	0.105009051889393
RASL11A	133.012325047205	0.824039637963165	9.78403654080622e-05	0.00187839817616289	0.444599201725825	0.365293656255371	0.335706523650432	0.450828222700802	1.28531279982367	0.765692556283231	0.464270457833402	0.593959538567247
RASSF2	4822.1165503172	0.555590665077091	2.72567314279212e-06	9.28419732781823e-05	5.48803356237338	6.11084968436018	5.18480488501703	5.94066967470261	10.2353507016593	7.93322323713116	7.51253971545392	7.65134306777822
RCN1	13019.3807310018	0.327271344054572	0.000332945423111272	0.00510652717659043	37.429683935445	37.9548256080064	21.5109830491307	22.7713331916894	51.9384799602266	46.5086372409379	30.0883992967902	29.4250313943732
RDX	4462.37996408028	0.44331359963045	4.84667449682372e-06	0.00015224325129954	5.41348411575066	5.73429289786933	7.88673300390024	7.68244237038234	7.79646170519632	8.08075055762238	8.01937675642263	6.78599311901055
RELN	7557.26571884064	0.646767953338941	6.03895834185611e-11	6.09535155578373e-09	4.14610588434311	4.13699782122016	4.40623478599534	4.9119039371161	7.39951962848192	6.29773574891982	6.3395347436203	6.43993420767851
REV3L	11878.944250821	0.362369408543044	0.00126560636170713	0.0146607413731256	7.50135756741488	7.84213110135286	4.54199082732644	4.5817635585407	11.7245949886672	8.99237142207923	5.37342155450862	5.75882292414905
RFX2	312.297431194123	0.600321878365102	0.000367585283023941	0.00553879602642112	0.514433898461608	0.43151732479053	0.459958025795838	0.317981654233595	0.805258232001877	0.805631490979888	0.613424304963833	0.592254877805843
RGL1	1027.69820834125	0.483977883443201	8.57607975330539e-05	0.00169875680770019	1.22191610120803	1.29723642883921	1.5045048833054	1.75661446511699	1.93693206029181	1.8116843829816	1.75191222606118	1.9161857744319
RHBDD3	392.3627837059	0.553324513212242	0.00377245479505942	0.034546021995851	1.46930954125003	0.846397632074069	2.03645678808887	1.73405504729624	2.35904629464328	1.59114154222349	1.92457956396044	2.18400082358537
RHOBTB1	2770.58644838163	0.383530920515553	0.000676204604033587	0.00902943638090374	4.04162066662824	4.1529582340519	3.40229096964088	4.22173583953672	6.1850021196339	5.05233925427224	4.15869895250593	4.25213273546851
RHOBTB3	13864.3894333414	0.586589358941557	2.7588913133266e-11	2.98199220929404e-09	16.0893344272718	16.4563312839597	10.7397573706644	11.1155347247611	26.5175961756047	24.7161512290051	15.7439153803634	14.8407178981592
RHOQ	5547.84954766962	0.570180749022917	4.90284096036816e-10	4.2867068702531e-08	7.96356821704836	8.0950381005604	13.4653518298652	12.8098917446094	12.7885599666548	12.2309810227192	14.681653504794	14.1710186278376
RHOU	58.996348352364	0.701733378916897	0.00135667904296553	0.0155711816244046	0.0587192388323893	0.0471360886570335	0.030577608595604	0.0413485555242025	0.203249780619834	0.110356601289145	0.0782433873948207	0.082061888555385
RIDA	485.289796592654	0.611071023164174	6.13707637915025e-05	0.00127835580359022	2.81281084618782	3.19048543396028	2.20354995771399	2.09564785861537	5.34897453512348	4.79703206794974	2.5024711519364	2.29103024378083
RND3	19730.8123772043	0.486593984532355	8.97448199172681e-09	5.8943882440399e-07	48.5253724720584	47.464074598689	29.0510048741232	27.5973369726852	69.0579747838285	71.2323515361497	38.7268809652906	37.3727955113057
RNF141	3249.52214749215	0.544494243880628	1.80528221720137e-08	1.10138262202325e-06	5.24801861976147	5.31546437209104	4.45744827251413	4.0257374838557	8.16841001192497	8.02271954884085	5.86934491716543	5.18373080530522
RNF217-AS1	237.629975962617	1.1007810607081	1.98057919693921e-09	1.5273826200216e-07	0.181181843486638	0.216089282601135	0.148089184384546	0.224935522829565	0.58219259811014	0.521842003364947	0.236091421004426	0.23413797291084
ROBO1	4787.18947833434	0.542178803865185	1.39503067273922e-07	6.76663817833613e-06	3.99956560742943	4.03991867771082	2.88062522963709	3.86719155788274	6.6868188971683	5.65367771881814	3.33578644690284	3.34114949590778
RPL13AP5	399.608503088005	0.483889326800546	0.00214018965124138	0.0221723647868607	4.36730394317078	3.72920372147423	3.82791114079728	3.13711113723625	6.31383026107701	6.02118911874845	4.79179472266581	4.60631377342504
RPS28	3702.48404645923	0.379793375333097	0.00101724028066214	0.0124489709868338	78.2573738350848	59.608265778698	113.805526697903	108.945866845837	95.6328569240892	92.4444905447855	104.655843566386	114.442975273827
RPS4X	24243.1627737467	0.445629020443502	3.57851505031361e-07	1.53507112798922e-05	171.067648229016	180.84570184127	249.373120109513	254.500445754721	254.309101972759	245.941216957406	261.473215496652	253.940941873722
RRAGB	556.261108196403	0.406611185600958	0.0043649376244036	0.0384826581696778	1.70897728496641	1.79029068456341	2.36080578706636	2.35060636571498	2.46081683459827	2.50891371406331	2.41663344027481	2.18894303944277
RSL24D1	3091.97122890852	0.36063067853417	0.00090153326740415	0.0112762834455181	13.9611781391051	16.0630382125475	15.52541489181	15.3205577428071	19.953131139512	20.5066062712632	16.0720288733491	15.3921237144026
RXRA	2898.761680005	0.569796826016221	6.93283704643977e-06	0.000202053193495708	2.90469856575959	2.25861670195905	3.35608182336602	3.2979177996881	4.56569897236671	3.62414592038592	3.39033475369637	3.64658229040087
S1PR1	308.467706029896	1.02796004054021	1.47771655946215e-09	1.15912086924211e-07	0.474367565138802	0.50823794416672	0.563468882395492	0.558701682243025	1.28349797464058	1.14562191040091	0.647663631170189	0.720364293569576
SAMD12	1867.98229713996	0.87438417188304	3.50433843051897e-14	6.32948074154394e-12	0.987250335737978	1.02361484634872	0.695129074216606	0.705396661556441	2.15922895565486	1.82910752065725	1.17103300242211	1.18339541033634
SBF2-AS1	7599.42463536657	0.323153609959546	0.000699105432446206	0.00925072587984111	19.8382434183703	21.0700957949315	10.6342624814715	9.16285211939387	27.9519618060704	25.3936318950571	19.0472880860754	19.0176346571329
SCARB2	16537.8425303765	0.350543611088825	9.36908980941099e-05	0.00181908763527277	25.1115968560566	24.9709384271472	13.8827298174585	12.4116237549689	35.0682367163173	31.4122782753624	17.4599594910375	16.3466851346129
SCUBE3	889.075090165318	0.848485107515514	5.8209302827573e-11	5.91963072396957e-09	0.666240027308819	0.640556657067875	0.364286536242756	0.528586038390844	1.37918929315193	1.19815247986957	0.630423863828406	0.66752909428896
SDC1	465.962702207129	0.646850858006153	4.15311318142161e-05	0.000933057031773722	0.931839328965526	0.764644341253157	1.00015092443513	0.714279440984232	1.36013764961797	1.59350018666793	1.40329089462478	1.46364724580997
SDC2	2944.82662013417	0.32555165154478	0.00280737314004127	0.0274773934410536	5.9954352709088	6.28397377530719	4.14338880158248	4.70465169873776	8.72215412422898	7.38545354003074	6.10205500068243	5.37399906652071
SDC3	10557.2424946389	0.403336568052197	6.55624236055356e-05	0.00134726854615747	15.4103897698894	13.6755910143174	12.883992712359	15.8942394058742	21.8014892486091	18.4318880233903	18.4680399609901	19.0715795494364
SDSL	48.8320457540502	0.677388014995052	0.00188911784184217	0.0201334283427059	0.182954855870371	0.106991842821161	0.320628221301754	0.377805659233976	0.491033123029762	0.383759102567301	0.35362560744971	0.261351940926648
SECISBP2L	4103.70967138246	0.337785881930477	0.000798244488916756	0.0102502358272781	3.93004095081185	4.34573019457754	6.02737084176947	6.20276049384256	5.52175814706033	5.40877243412277	5.6280424599261	5.5774026253333
SEL1L	10468.2493186374	0.406302836634105	4.3115228085896e-06	0.000137637845566301	8.58189031090341	8.64146483669168	5.37035072804761	5.60979748509643	12.3156125484091	11.4804869810757	6.6806723145522	6.17486842845558
SEL1L3	1064.04177371733	1.22968090613207	8.74863840870254e-23	4.29433266474308e-20	1.053637849773	1.03092886364308	0.962092391065885	0.99511030610283	2.92600470547434	2.54435380815796	1.4111641276059	1.35585645499994
SEMA3B	1213.85841539006	1.38406098875008	1.70097020194249e-20	6.67120513201846e-18	1.7899489538394	1.18721280033788	0.82639233886903	0.99422214921147	5.01367455754029	4.19925267127945	1.48251212825887	1.63921857929454
SEMA3D	496.031827581021	0.479109625095223	0.00160029912384073	0.0177729013535288	0.489496555710999	0.568135947391852	0.571037939909599	0.552817897759151	0.833237578103548	0.773450394925511	0.80128013960321	0.800523811067913
SEMA4C	1200.68423658403	0.473632060305523	0.000317845912913427	0.00492445919476592	2.53946538249593	2.05205210289425	3.54555958705604	3.37608162033795	3.68964819996498	3.09358769442438	3.05015964034185	3.36293275057486
SEMA6A	503.933068903472	0.504821194126286	0.000574780400382352	0.0079369865043511	0.465891277094312	0.489383111581148	0.343820727300928	0.569622249124079	0.730213874109038	0.741104596864907	0.608286201861718	0.632207906658114
SERINC2	2114.61313822947	0.471328596184483	7.19005034500097e-05	0.00145357615737597	4.56028173355908	3.57786374308478	6.60262134396038	5.37627690126761	6.15388518190369	5.75393365818434	6.80764848030828	6.75019788817289
SERPINA3	70.4892565832132	0.783123917869752	0.000358174294652348	0.00542677543343574	0.207092151078813	0.17009274700401	0.320257179838109	0.350261273361245	0.695798396151201	0.426305847161764	0.473057652229895	0.620159038441869
SERPINB9	211.0779648364	0.647501825878854	0.000541559168850656	0.00755486047846845	0.283713978717831	0.314714067656787	0.326472153508805	0.309235385082788	0.605870454479962	0.508398478310444	0.474163007824737	0.500720629954698
SERPINE2	5809.42874524628	0.939495587288263	8.75947509381557e-23	4.29433266474308e-20	10.5409589991107	10.5553455758048	15.2305787243992	15.8979432416896	22.793367120885	20.3179746818397	21.2877118895415	20.8453245189009
SERPINF1	1295.44979720995	0.504424974291982	3.42895621586479e-05	0.000801861703154617	4.98636022577558	4.3550316865761	3.35802214332206	3.28828216376177	7.50394786187366	6.54904634770247	4.47373004738176	4.44383973952072
SERPINH1	26147.4287059834	0.555586987824794	2.47435179469965e-07	1.1099812773151e-05	77.3515963436835	71.1829562894018	80.2027559031194	70.2797833714222	129.596373223723	101.159566894345	95.4414821681253	101.646054181849
SESN1	986.039991140275	0.341989113844187	0.00563751162064747	0.0464223887322302	1.99781369350236	1.91293927982215	3.03267496757328	2.73913056257922	2.73792400154907	2.47676452675493	2.98170461302612	2.94347404964142
SESN2	1481.08122709888	0.511678193852977	2.13198290166505e-05	0.000531138462634413	2.63593173950965	2.96907374291635	4.18825158126171	5.05052915939789	4.49541504577732	4.01303215496162	4.30487176877626	4.90145214552664
SESN3	65.762639180736	0.854679661415257	9.61699642951896e-05	0.00185410828634841	0.0274122977202226	0.0261757130987588	0.0323825368807611	0.0178621720933612	0.0810805315323439	0.0913109309945102	0.0572061306608715	0.0383816500547584
SFTA1P	156.528517430358	0.683707393059159	0.000578431037673263	0.00794610426647656	1.31025245264741	1.22787890535996	1.07594132929532	0.6027223210437	2.80210881966501	2.27305934603355	4.28666479826845	4.2495281448187
SH2D4A	1687.41364634417	0.787044019269116	4.48036291325468e-13	6.68499366415728e-11	2.81140775830686	2.88481316065064	2.19083808294701	2.0978767439036	5.30490212906968	5.2162915988851	3.44635302189855	3.23616874554881
SH3TC1	48.7531955839466	0.730360596958605	0.000843384344621583	0.0107539283759823	0.0472787914651131	0.0416732472077712	0.114893708470802	0.109267662973705	0.153612808925355	0.129244349097576	0.123426594526671	0.119454954949067
SH3TC2	632.312528242799	0.559590578316976	4.2808412151108e-05	0.000953946548049123	0.159168712601515	0.149892887108197	0.147445073344121	0.141542732528741	0.246240733765549	0.24495677918655	0.234101893772295	0.19171216960938
SH3YL1	804.164579872676	0.384957015228789	0.00312241162125781	0.0298685326306662	0.7590514527785	0.807428428116899	0.801141275082572	0.848987071666066	1.11285748762018	1.05767997951951	0.778674427931794	0.804571252997615
SHANK2	1761.89865574215	0.37264494643182	0.000896579323018058	0.0112293288020702	1.24852556592584	1.07127916153562	1.43732924407398	1.8852377304151	1.60912339300573	1.53637585104979	2.08781311729606	2.22221930337778
SHC2	43.2486225955528	0.729614339808877	0.000497980281474377	0.00707637197080618	0.0800166509235045	0.0238037358893284	0.273446762914527	0.224515693227246	0.316408566259167	0.168428775921011	0.258939603326247	0.350260703509038
SHISA3	79.9499244421809	1.26051319061928	9.26469220332e-09	6.05602047023684e-07	0.121498646820834	0.0736266633280156	0.156855685493659	0.281019132612891	0.74578129548835	0.43592918965027	0.26211887192112	0.248461457792591
SIAE	1362.72357270173	0.350848951170464	0.0033192553638998	0.0312316018864975	3.0104690451767	2.95806319716419	2.92651990717029	2.48194263045483	4.32375453261393	3.67836199114386	3.66668440742395	3.3048645434228
SIL1	1880.28667434403	0.337455129524295	0.00344737526399825	0.0321481795169184	7.53876796176149	6.15497929836307	9.07472054856015	8.13619770060461	9.11801744406931	8.98018516285087	9.32119131924911	9.22764290019233
SIPA1L1	2586.84261522268	0.357823829616226	0.000694462922389964	0.0092194318526567	2.26304464071245	2.1127980200675	2.71334237475298	3.0031905783791	3.12029101502393	2.74196482912135	2.55519600275249	2.73923490722879
SIPA1L2	87.2843907518859	0.903790972171807	3.83841252115903e-05	0.000881101817357022	0.0438497067335459	0.0519785640924587	0.0606292952976481	0.0926498380668387	0.245026280761978	0.107056651727114	0.0610202163373594	0.044125382358516
SKAP2	1113.96935668363	0.904780421923385	6.78696408653579e-14	1.13615434165703e-11	1.39707086615694	1.49037928151631	1.98211150258619	1.94032864805655	2.96345432606037	2.93491291726449	2.36235143246198	1.99727230294682
SKP2	2667.89318236244	0.351642071565307	0.000461617641706771	0.00668420397437643	5.39055324449623	5.57031724741018	6.59918395936284	5.26047085331712	7.35011624806791	7.26367012254763	8.31528755915208	7.71510599302754
SLC12A8	1172.10792098201	0.817100357290529	3.6805668530826e-10	3.23866289694006e-08	1.91045388253723	1.92540056134005	2.11351190980034	2.17768431709697	4.12686681161808	3.27281745384803	3.03255260676432	2.8485741720688
SLC16A7	3365.65420210003	0.335247317206126	0.000459014448140171	0.00665352833117226	1.97438361318169	1.96234934923629	0.704311172582344	0.667940973309383	2.62643157280166	2.54926344614479	0.962022887803263	0.842760628403463
SLC18B1	401.48285125548	0.464719142116082	0.0044281019229086	0.0388151692820985	1.1315344337296	1.08532602088825	0.821183745150426	0.801299199062509	1.88866300722141	1.46450635968776	0.92111019519478	0.829613430626892
SLC1A5	9055.77330109159	0.432651610641713	1.6613028980431e-05	0.000423879272889175	20.4323366718986	18.9205826978661	20.3642724382175	20.8584606852859	30.2630823782118	25.3649600561316	22.0178517820754	21.5357312514325
SLC25A23	234.357135074094	0.545036694093891	0.00296442871726343	0.0286043837583856	0.455646261990011	0.398445796961106	0.352157280843866	0.397146900585179	0.789301842854975	0.6373763518849	0.599463230873564	0.524068911602562
SLC2A1	48591.7250462997	0.505716824154857	3.07696589075306e-08	1.80502182830629e-06	96.5807103262206	82.6835572424835	81.1879999883558	66.8862616536969	135.637492356577	130.448460356209	96.5908652217282	93.4426783124036
SLC2A12	423.463651901635	0.889933285377326	5.43038190787391e-08	2.90617955810189e-06	0.413451280206707	0.394669351633723	0.269591126114582	0.314618271452811	0.990725173906247	0.751948655246177	0.51428605001661	0.453873357671813
SLC30A7	3458.38416171205	0.911439392055358	1.01695708264928e-19	3.77291077662883e-17	2.26377000413585	2.44389914916026	6.38702499892349	6.02064158016376	4.79670511375621	4.67349412085409	5.72593638717499	5.29521017654192
SLC35B3	1186.7252059451	0.486224872785935	3.35121969772626e-05	0.000785020354789903	3.20624062634625	3.22027260307419	4.80667251157724	4.79865622866762	4.68090735096606	4.85556038455234	4.68198983532856	4.14969974311623
SLC35D1	3277.8031514174	0.407758835493252	5.62101992284797e-05	0.00119442322725904	3.4537118829226	3.67900863193446	4.49724260956597	3.9150502156485	5.14129922528806	4.77490246711215	3.79291580858405	3.54861839047581
SLC38A4	705.806325604799	0.616305350049422	7.84444212333751e-06	0.000224803041810134	1.04715940816653	1.18577360427699	0.595851686906032	0.455944905504137	1.91324432708277	1.81445264493575	1.19982067364998	1.02681475861969
SLC39A8	215.234367343155	0.571388175128644	0.00349737657791564	0.0325260760738807	0.225380897914283	0.209249198284248	0.119307140364275	0.0743985569053315	0.47028049688123	0.299676882391867	0.264988281888075	0.235211786064468
SLC3A2	5235.56580492437	0.660523810796954	6.79505179006913e-10	5.79352024361981e-08	11.5184548035973	11.1559409965384	11.0106338647132	11.4716851115863	21.0154468425616	17.0441853830322	11.7105553700154	13.0851007046779
SLC40A1	495.800169255454	1.58386070078038	2.42807147495345e-17	7.2456819862361e-15	0.431243241035275	0.497424370886577	0.458038677849149	0.614364355897788	2.63801955262095	1.43985267427437	0.871854888113716	0.966534786005182
SLC44A1	3665.15355184462	0.343618920213505	0.000354756623636948	0.00541082685851598	2.4222141913072	2.49964928464501	1.76724175185789	1.74983675837836	3.25157231646214	3.2629931626757	2.7132242605571	2.4260364709669
SLC45A4	259.367218311206	0.522295179232874	0.00345027933586826	0.0321534178163364	0.229932881662358	0.192092217169417	0.324668347990023	0.346818993321894	0.369291006313818	0.314279666481215	0.348231010370204	0.348570103030918
SLC4A3	76.1007092361074	0.645193168209267	0.00302940519930418	0.0291208999795857	0.0991810642433942	0.0823391363494936	0.168155642276796	0.193105209654778	0.219969823599201	0.191996274859145	0.194945163708407	0.215698205059904
SLC6A9	561.085958195266	0.489943052746544	0.000874168766201436	0.011039295909519	0.958195102070183	1.04747789241557	0.700025669046617	1.54908015461938	1.64151588593484	1.41358926712559	0.957850997939157	0.946161427233652
SLC7A11	19115.8452263387	0.782550372270312	4.25563213099856e-15	8.71896451674885e-13	10.9885013923052	12.5813369668042	11.2569431340661	13.3419497252758	22.5230930924058	20.5987521669567	14.6856866014332	13.6423625397598
SLC7A2	5229.5107176171	0.780740569627802	1.42407613683739e-09	1.12346512243488e-07	3.70969989825186	4.0901301430253	2.89323247694655	4.02251636000904	8.57772331906829	6.05338799104122	3.39831204370025	3.19936385311499
SLC7A5	4768.92417300376	0.601485848686592	1.60878979592376e-07	7.61512328573981e-06	7.42167348893644	6.07494914274903	2.41349215687077	2.6260317832704	11.9435928727504	9.81093333806561	2.78550595741397	3.0132440267104
SLC8B1	1096.3062531512	0.550646270678698	1.54676371713063e-05	0.000401851178169798	2.14134990932107	1.88438768175877	1.8801732196897	1.63445957757058	3.40717695812368	2.89023248240483	2.21082716851604	2.24420231087413
SLIT2	3246.95555433673	0.411018718094255	2.80574020370454e-05	0.00066981557871743	2.93341836003122	2.7292976270131	1.24021301819337	1.04330634283362	3.85338116454993	4.01405651805072	2.12148524825007	2.09816814844191
SLITRK6	2371.63664028867	0.67236460221855	1.78917364606454e-07	8.35373695222038e-06	3.25999816351111	3.74225674491855	2.85991784460531	2.30424097189545	6.8686646015292	5.22211055785474	3.75790994723645	3.60409970246689
SMAD6	245.910903663523	0.570721512991093	0.00156164689196277	0.0174141819919966	0.537026037198034	0.482120111028301	0.419910057641317	0.408254482171057	0.948428030123066	0.783412546702727	0.494726959766853	0.565041779924861
SMAD9	987.465662318973	0.71254277536053	2.69949480239412e-07	1.19535371459562e-05	1.00458816101585	1.11943301790808	0.593517698494809	0.694975163707648	2.14164904460777	1.67991767977244	0.892635610845427	0.828409004457231
SMPDL3A	1739.98888843493	0.571298626797846	3.6623337233765e-05	0.000847099619720103	5.62943730269865	5.75961307215976	3.38162404314272	3.17259851354225	10.8177539492942	7.50766937731021	4.71813969458016	4.65025836544241
SNAPC1	1639.81627382136	0.463999448022594	2.69131630438123e-05	0.000644741691278205	4.45181494677741	4.01588263416213	3.0024756567452	2.81133437131205	6.06453022224654	6.22558091369973	3.63574555348239	3.40358469604955
SNED1	224.351270970985	0.537531179978376	0.00473960934151853	0.0408159456907308	0.227769961039672	0.184356075924708	0.323324988957654	0.38841504387678	0.401881383608025	0.291965392734599	0.260145839561336	0.287604322174563
SNHG6	996.542111981976	0.339041634822887	0.00515517717958488	0.0435477643964071	15.6013143245314	14.855604495854	17.2805840496559	15.4221351818088	20.6197384726437	19.8623007770779	16.4346229681024	16.1659504095712
SNHG7	1184.22735403815	0.416508086349199	0.00147201971246832	0.0166444930750021	3.4639883960686	2.70654525843578	3.9212783538714	3.43502661468484	4.60258125636221	4.1134219690217	4.22467032267274	3.8603859607707
SOCS1	410.396006293679	0.670057845860566	0.000150859800692427	0.00268245140428102	2.27296640997911	1.74128765130329	1.01698209246054	0.714364304173237	4.38995457085873	2.97553936432254	1.46203673319257	1.86125751680016
SOCS3	2288.22134585536	1.13716450140335	4.49339621807832e-23	2.41355576697858e-20	3.93727529403504	4.3139717444604	3.79733931130528	4.30839560613513	9.29397546496161	10.6351272829508	4.92164109369815	8.00084585470446
SOD2	37349.9774576581	0.449663902398961	3.7982116961751e-05	0.000874180405990403	33.3912900266713	31.8842468389604	5.20884468740364	4.55579159985605	53.1382076256162	40.7174209097393	7.11059210822745	6.22211110083755
SPATA18	457.550965890369	0.428371876575995	0.00543086081123863	0.0452363024004082	0.695780661686115	0.708434523929366	1.63103432396731	1.66808602283082	1.11190499447042	0.933279433734673	1.59958283588295	1.61883962198623
SPATA20	3992.89930462199	0.369114765178875	0.000441486628183643	0.00644711377135838	11.3017721539459	9.2999458940771	10.5746469952544	9.06159407556105	14.0450656939255	13.7420941126858	12.5247984655467	12.4268722646954
SPIRE2	58.5001996028833	0.648197073252374	0.0031407117179907	0.0300017743582869	0.0891998195852865	0.0793017596592482	0.126136170168094	0.148350051798733	0.26710479677728	0.173632585063845	0.203757877894112	0.212161426767739
SPRY1	603.170356371066	0.723643059281227	3.41842957418198e-07	1.47562209952189e-05	1.27309885946152	1.10191058469277	1.71036019588929	1.94681127954979	2.23368848808705	2.07198964393456	1.37661082559262	1.36447333907261
SQSTM1	24593.5520395983	0.369955523435215	9.87608942572244e-05	0.00189078214151872	57.5444278433836	48.0860090065576	44.1730884494136	37.2115284289382	71.6994483405289	70.4852809082095	43.0712443595582	42.6189784076041
SRD5A1	681.778816002146	0.700491126388532	2.73198973832939e-07	1.20585283402082e-05	1.45327825318466	1.29043406263633	2.07986570740727	1.95769601872961	2.50456691732011	2.35116049138883	2.0043963255036	1.90801314900342
SRXN1	2970.4401299912	0.33941456914023	0.000482509874984638	0.00691379233185191	8.09675070274873	7.9062140111415	6.65829275016579	5.65834607921018	10.7373063190717	10.370526838605	6.70758081959835	5.98038859990828
SSX2IP	740.923702011243	0.49725786110753	0.000190124485005573	0.00323801340654033	0.783362227294289	0.837211816795629	1.19128330082602	1.16286421442737	1.25904762042293	1.19452726182627	1.00779319523982	0.948183962325846
STAMBPL1	2523.5105697422	0.361935634566409	0.000404002961206848	0.00598246887646862	8.5009017403855	8.76983891464661	7.76857987635846	6.75445833687135	11.9815990273982	11.233732836787	8.18900023405868	7.92935601766163
STAT1	19573.0520530697	0.388598131654347	0.000131644163523441	0.00238400980565471	33.4569276849802	27.2011979199362	42.5465072530195	23.4542287551591	43.4395255249677	39.5143319848623	42.9629521555332	39.3443856263031
STC2	31462.9430935831	0.48557448019038	2.91230147688409e-05	0.000691646407840622	42.4950641592764	37.3616343978944	40.3458990743932	35.4731138377225	67.8721101574563	50.4251605424919	49.958117291785	47.8753504585449
STEAP3	7331.12712981957	0.511674729869063	1.3152671588822e-07	6.40236606027517e-06	11.6084383250586	9.96349054296314	11.3861068682626	11.5291138242131	16.6527142324931	15.5740267706116	14.8487853558732	14.397767085552
STIM2	1192.92382843656	0.556119413272927	4.03031284209732e-06	0.00012974509742326	1.50070572932845	1.47995066868933	1.37279240450729	1.54566670115356	2.49084024171332	2.17834131838526	1.49026358782228	1.58317663986729
STK32B	1171.75655496325	0.580561889608415	9.55658226145894e-06	0.000264412834924066	2.00388439809587	2.16656811170025	0.954515529095231	1.07189162622222	3.72933477580133	2.99064283240017	1.55100025656189	1.53379502182476
STX6	3022.42152660986	0.36655613966374	0.000262592306776201	0.00421209407407091	4.13835455998793	4.38321680892781	4.94532468490613	4.5654282576329	5.72192917109681	5.76800570894735	5.58324959579184	5.45156811018357
SULF1	321.360000657025	1.08992168455198	6.27122576123172e-11	6.2380518858281e-09	0.248581083801218	0.233413261392867	0.457392285764729	0.212283037901025	0.642048447587351	0.596867439831216	0.661865810129216	0.577561484814041
SULF2	23.5208148940194	0.638773028926594	0.000759169580496787	0.00981273147973578	0.0112088029321063	0.00740988508300069	0.0163433230395286	0.0312803541139283	0.0399774189932166	0.120113133719859	0.0324318713394678	0.0252758203934019
SVEP1	17906.8692607405	0.458939715373308	2.51568919346483e-05	0.000608104135568443	9.70160370398625	10.2196108498798	7.77728053727091	9.11618970203999	16.1825283927032	12.675505595378	12.0977950976286	12.5412837363069
SYNE3	1529.40712908332	0.51422562800156	5.18738255791093e-06	0.000160738601292197	3.2386855515973	3.02119680956666	3.21517952378147	11.4626983270233	4.9584466455965	4.48920545042596	4.19665496394593	4.25156051199732
SYNJ2BP	1998.51496934768	0.41022098162011	0.000132249116813186	0.00239180978457787	1.96310879293961	2.00691342740874	1.73746162385309	1.8987701808643	2.68037934032715	2.85999804119207	1.95105316959045	1.97221822617439
SYNPO	2446.75964474109	0.330499433339882	0.00204778915258633	0.0214908269858965	2.26867910197819	2.04020189027562	0.869517622709597	0.926612559908221	2.99952277042701	2.65775211912787	1.51657193143897	1.56963318563532
TACR1	171.933920495765	1.60594715407991	3.71301599634011e-16	9.1015304610287e-14	0.0959238265106606	0.100404017077394	0.0182115288526291	0.0321281506131977	0.46019234846895	0.508604426474802	0.0989071737967693	0.082175822002615
TALDO1	6655.61048876605	0.4860701548354	5.32063036641084e-08	2.86416835449889e-06	36.7896411942461	36.2662715010967	24.9966507553132	24.9563913882098	52.8608942263209	54.0706506383911	27.0469406590156	26.2742278585037
TARSL2	1670.13780904388	0.444692571121645	8.99300196736953e-05	0.00176943807436535	3.33208379088558	3.65658977954464	1.71977813899859	1.81474215911778	4.93689200463785	5.10962211100183	2.4656425274962	2.34857725117926
TBC1D19	1277.75668098893	0.52489431616937	6.47420288560699e-06	0.000193619570829471	2.82984264075147	2.63258644462743	3.32272878717295	3.27627010843435	4.33859524778612	3.98780806154953	4.07301162291211	4.32057496503141
TCAIM	1433.54958927888	0.335325977237267	0.00261706550966929	0.0260048607359448	1.92412183705353	1.86880525249044	2.16065093455548	2.05967048185991	2.56374956398606	2.44647827694827	2.5621565235595	2.27286687321351
TCF21	995.349390335211	0.632880746945619	2.7234844243893e-06	9.28419732781823e-05	1.78365285237206	1.64139563320736	1.87187196819067	2.24952894272351	3.21701148853293	2.53241087503076	1.71169414367733	1.83334742902504
TDRP	281.478373981774	0.682105445948361	7.84237877116808e-05	0.00157847996175695	0.515956622120508	0.458637034417516	0.695988981975707	0.706498596912921	0.944743457054216	0.850654111092311	0.834558812811494	0.784933867571255
TFDP2	1833.91102343814	0.575151211427514	5.4410151266277e-08	2.90617955810189e-06	1.18564066916912	1.17667586814959	0.778299792634867	0.753619319350987	1.86908826953039	1.85081408461377	0.849587812280815	0.812460961217043
THAP5	939.178193363122	0.913156494224617	2.45083735873989e-13	3.73807160260249e-11	1.34568409214892	1.38053570937017	2.64463025189806	2.57298671035656	2.88919160835614	2.73630992059336	2.60271184749341	2.26706525374069
THSD7A	38.5102820171537	0.590527319788339	0.00445681313542749	0.0388998864637212	0.0103692810648815	0.0155793096383732	0.0128857104715887	0.0131534110685966	0.0263121386284819	0.0703499519849402	0.0122020854170177	0.0131293240045106
TINAGL1	28.5075840188323	0.801543933634769	4.62223053662259e-05	0.00101844877329403	0.00437443067521307	0.0260265310425186	0.015945666560487	0.00663462135986766	0.128885132258443	0.263678870215028	0.0866012308228443	0.0696305603245419
TKT	10208.1315611996	0.703643570780274	1.51797121395356e-12	2.12624396468781e-10	22.280389229004	18.5852474652303	12.6202006366047	13.1399154686518	36.615093294316	33.7305534441075	17.758850375002	17.0465737503293
TLK1	2117.05929614277	0.400497806220966	0.000111608281831169	0.00209296022499516	2.48624814064191	2.46376295857077	3.16717960281886	3.43214946424104	3.51938909785555	3.32525369384438	2.97127336454802	2.93259141904322
TLR3	94.3807378154433	0.593447888591565	0.00572910909986627	0.0470637226893264	0.170621496628863	0.173529225935869	0.0986746266859208	0.0676805557307697	0.407050293956638	0.295101555348256	0.167391878974057	0.189328836522037
TMED5	4313.02062145435	0.753968401336282	1.85393391915423e-15	3.91522321665078e-13	4.26871302755797	4.16680109803821	7.85660135927132	6.48015364410818	7.82155736595101	7.2207212299319	8.17247915019873	6.96340690593252
TMEM123	12197.9379457567	0.534389935585735	8.55693499881224e-09	5.64716570811037e-07	21.8822828028628	23.4581345240187	23.0668802103521	21.9145916083041	35.8055547845862	33.0921983589344	29.5755867785412	25.7854733717121
TMEM155	95.8417858058486	0.960655300586212	6.66450646972143e-06	0.000196739097440572	0.148872318477657	0.141623181350926	0.0794149900097618	0.0726940107163491	0.439189936435256	0.448159954032379	0.218416963288625	0.267313064033404
TMEM161A	571.559624352816	0.454757393272431	0.00432492409808445	0.0383630666074612	2.47403864022055	1.76189627478542	2.76224634791754	2.37399099115738	3.42150613946732	2.87398308119185	2.76956577406426	3.05715763630351
TMEM231	204.578547236831	0.993320795893713	1.30455515803611e-07	6.39406209511073e-06	0.284175615022186	0.333507901676857	0.509208915942593	0.61018559569732	0.802120283661545	0.788187874355826	0.544595437311352	0.537895150099615
TMEM35A	1420.71015655133	0.516317501877788	8.24034238981952e-06	0.000233709049555894	4.86370968960988	4.32422780391495	3.7074907268422	2.98869756346648	7.25436996121035	6.64589844157694	6.4928218855392	6.10948039008928
TMEM45A	2520.50862370819	0.375067502585007	0.000189586032163445	0.00323285399193491	11.3274924126018	11.4921850788791	12.395368962911	9.81039766324898	15.6400094501908	15.3052662632926	16.560339926037	15.113804953352
TMEM64	2262.42744325923	0.491349232718643	5.35504590339971e-06	0.00016409670335583	3.2259479113324	3.13730505798578	3.20774596501352	2.55628285038234	5.04100620449719	4.38414139814141	3.92728847430609	3.32881471635781
TMEM92	76.6211290407942	1.04934199250772	1.58062162498551e-06	5.80138851502033e-05	0.0814970726256048	0.100724441455309	0.0193743246224099	0.0634148230106271	0.423089824582762	0.315290120937751	0.188860611416679	0.141004357333345
TMOD1	691.124135858288	0.957157574291719	1.574611489495e-11	1.87953842750417e-09	1.00188507628003	1.12826033412723	0.44058397989362	0.591030894006018	2.50431351760371	2.16517859598537	0.691899851162549	0.650963256832487
TMTC1	5943.21137941967	0.387662713925113	1.56396711288844e-05	0.000403544672154504	4.71388944584023	4.48099279147619	4.1414619257114	5.29946620247207	6.25029728020621	6.27871756615895	4.66202761192239	4.21774356466669
TMTC3	4711.17604637379	0.3367511477875	0.000599957601193447	0.00819464476774373	4.53813385931521	4.9359916129088	3.81873864740471	3.70576052998659	6.37995389672488	6.11141495309662	4.80664021406133	4.16288660397502
TMX3	5409.07412213305	0.664867420960742	6.55528701867821e-13	9.67574461348342e-11	7.05720217033938	7.30664828405968	6.2568384410378	6.23713637028994	12.1517664674021	11.8364834894425	7.50312305728597	6.49646646585094
TNFRSF11B	6535.03191095656	0.804773761946189	1.74245297835212e-11	2.0443292336615e-09	15.4094504216084	17.0389833705782	7.81782352527257	9.59491644677399	34.9824331977995	26.4023691200664	10.5673250818913	10.084676514253
TNFRSF1A	4264.37182452649	0.457539845879697	5.1289783983685e-06	0.000159649629193661	13.2345731377264	11.8558559640946	9.6012011439383	10.3068401272245	19.0739042126867	17.016525674257	11.5616948768893	11.7138527678481
TNFSF15	55.5013919957337	0.986296651773455	6.96663852505472e-06	0.000202608150494547	0.0265492054194971	0.0243764955686889	0.0201618987940526	0.0290815117788848	0.122365922024823	0.104429688802251	0.0202153239816041	0.029347248355558
TNS2	3190.17147070291	0.499623564210286	4.56847898626286e-06	0.000143833740927592	4.51019031926878	3.7859778087031	5.33442967612215	5.21044290558301	6.54008770140627	5.80817160767789	5.40409644577023	5.80060302472412
TOB1	874.340280896804	0.482050003612794	0.000178066598610332	0.00306309555332247	2.23892499965884	2.44413382086091	3.39092230277782	3.40174796194269	3.51491485267803	3.47296025260535	3.86517717077578	3.41665840168063
TOMM20	6561.24892564938	0.334711586066809	0.000259478351408835	0.00417079546813709	13.9191954563959	14.2253594731098	11.8974798940164	10.4464114477559	18.1036377322881	18.8483289690037	11.9182324038368	11.6911287843387
TOR1AIP1	2506.51237601881	0.371493934042753	0.000217974443057056	0.00360933073563836	4.49924114569668	4.33623221580277	5.35622177069786	4.99848347310509	6.13347554847951	5.8072348936208	5.66164953966043	5.34452194047357
TOX	943.180550744662	0.788824757919976	2.64591209451622e-09	1.98472324160788e-07	1.21253796606653	1.43869474957622	0.376399369861082	0.438144548558275	2.55448693341472	2.47973111809121	0.901191085026766	0.876286386779363
TP53INP1	1808.70426827998	0.355437415638603	0.00498331341774126	0.0423304104488454	2.08847564506378	2.47885670288118	10.2642329002178	11.6425680859348	3.379585568763	2.80223335302417	6.86498679934794	7.08381409240604
TRAPPC5	701.904380964929	0.481345378772379	0.00381414970461585	0.0348580778929838	6.87900323872277	4.11297440172967	7.73441273585073	5.06707576258921	8.39182667864861	8.42369051765375	6.46242287907214	8.51750367949541
TRAPPC6A	97.7976849148095	0.638197888287048	0.00309279040321895	0.029626471643396	0.812025943810884	0.479877314861092	0.482120472642494	0.608328514294174	1.45953692524728	1.318430476417	0.908713294516269	0.742564993687088
TRIB2	1006.66651331521	0.613359278897225	9.59259793051541e-06	0.000264412834924066	1.5331724245572	1.36087568045994	1.94820867911374	1.66242590099395	2.72164649494909	2.07794562731592	1.92612594875184	2.03370569647242
TRIB3	1830.62138561235	0.685562080246466	1.2976978907478e-08	8.20898568953692e-07	4.03685251137792	3.79508852898291	4.71186438127888	5.52923139255142	7.50871909176877	6.01183648859501	4.81329991647084	5.09344011371121
TRIM16L	126.649472019866	0.722697941512855	0.000508180457167441	0.00720639786729077	0.281923449409191	0.386058751414186	0.325733683796346	0.319164117686009	0.776772669148919	0.708066014248797	0.264497421368793	0.307183660133404
TROVE2	2552.76353122059	0.380891126274289	0.000128478109231795	0.00234212351318041	4.92737892755399	4.83467249436333	7.37799822554421	7.05284600077784	6.72214934619188	6.56121450565451	6.76271474259481	6.24975358199539
TRPC6	1189.96233834373	0.772406365517925	5.53276242430178e-09	3.87490968359135e-07	1.43872957202018	1.58756948568621	0.928623309568831	1.01065480640336	3.15029192146272	2.5129824357233	1.52874369676438	1.5267441440689
TSPAN10	180.136706900837	0.622437631697368	0.00180641679733422	0.0194105201755126	0.601201238557109	0.385116750402102	0.628569089540133	0.549926132106755	0.881693561177608	0.967616201763185	0.805536440629254	0.84383962150429
TSPAN15	129.810312310572	0.993874482769407	2.79798898735015e-06	9.45581081043362e-05	0.323010123813335	0.306713417522125	0.214079254999829	0.23871672244014	1.22946139221225	0.72486377497409	0.375631417362708	0.41677756441853
TSPAN4	5435.82937624765	0.534923539418407	6.19604111852953e-05	0.00128673307767103	24.4716550976661	16.0733075423314	37.2043075994376	27.4199792255362	32.7817781759041	30.0914530985249	35.0090198962699	39.4712780511925
TUBB2B	475.870691833485	0.494540120484988	0.00132535703378723	0.0152627315459708	1.74455718606579	1.3917856129658	0.96379668162912	0.905465782902656	2.46387779823531	2.33115239321301	1.32082961928839	1.36682737902049
TUBB3	2072.87131629425	0.693047028063619	4.48662076752413e-08	2.46351373103215e-06	7.32687262873737	5.37632966647587	4.43318544181612	4.79657260540249	10.8488402363315	11.2506239456121	4.45780981355224	4.85283670271502
TWIST1	764.91793254465	0.71791348683565	2.97333871231439e-07	1.30399426530158e-05	2.96467455175852	2.55774110850729	2.26506709951312	1.83310605807381	5.4471273042492	4.49836534446136	2.51276922006432	2.56608746080384
TWSG1	18454.8209311741	0.449629853720447	2.77051275950291e-06	9.39032806165346e-05	32.457970471413	35.4769558673117	36.3599607701097	35.230277136332	51.2697584600737	45.9219716347472	46.8032740937048	37.1978404398863
TXN	8650.20978171045	0.379637411796225	9.44717138227352e-05	0.00182684058656878	67.8463211252192	73.9953634188235	53.7724112395764	40.543325750978	93.0251691727775	99.8129688641346	60.8682706399786	55.1687020647862
TXNRD1	32836.2955514743	0.753244405129804	1.73429501015374e-17	5.2903705787512e-15	42.3234935666222	44.0248012661383	29.5513169300121	26.7572045835578	74.3643758067757	78.9779153958054	39.4250781109648	36.1567553246724
UBE2W	1662.67211973696	0.383713914827088	0.000903109209628538	0.0112802366884176	1.2307904501486	1.35656324394346	1.9020493060057	1.7504852743769	1.7144927700396	1.84255871372799	1.95206631961263	1.72945485226932
UBXN8	299.470882170448	0.472347996353961	0.00543433559025585	0.0452377954199163	1.35751453378572	1.38029886006134	2.06602374389691	1.88751587066822	1.99289666385945	2.22188411490048	1.94137379880886	1.80527125631937
UCHL1	6982.35109225704	0.390504510213661	1.05666929016273e-05	0.000286658089843159	45.2031715986298	43.0636124956498	40.6030685866147	37.895862849201	61.4033037129081	59.0902404408299	47.6269016320036	45.3060548573419
UHRF1BP1	1199.37344027587	0.389009285396621	0.00175024538519333	0.0189925837174299	0.835908609023143	0.917576538896384	1.1063028308284	1.38186331721233	1.29624316768551	1.13376887219163	1.21697138755064	1.08338811409626
ULK1	918.188886967161	0.487622255615966	0.00110118014174248	0.0131671601094939	1.3127036511491	1.04085302059193	1.79178740529398	2.33813966726831	2.05783186770855	1.50826323899009	1.71535076047082	1.92501820027708
UNC5B	535.054311129084	0.817547052438651	5.58612397999591e-08	2.96064570939783e-06	0.427218073903846	0.449006557288259	0.683625903115963	1.11579887249694	0.953307431413184	0.787026179375565	0.59325178764495	0.601269320698932
UNKL	689.499535272027	0.627088000284196	4.72590280368647e-05	0.00103464860903037	0.761526788570688	0.613190160994475	0.986410414311651	1.00971187859437	1.34305633915552	0.998982305869594	0.869164593030394	0.904256807450928
VLDLR	1807.66528060181	1.03088524737303	3.08295228318868e-16	7.83697888728352e-14	1.68603566201659	1.85641552742587	2.26592518337544	2.633522671143	4.4822693778235	3.53593714996678	3.07765177052003	3.30701969818129
VPS4B	2569.98894490309	0.487481150919967	1.02417804973833e-06	3.90524780243278e-05	5.29623769440459	5.05558559668354	8.04050913431725	7.44761662683747	7.56702037951218	7.6589584004008	8.09240324509102	7.75799462301546
VSTM4	2202.72179752988	0.418961998664672	0.000210339339640772	0.00351684301491946	1.84072361468296	1.95186065186667	0.823577740053111	0.957986437328877	2.8878222408413	2.45503872704374	1.15970163397963	1.12692130006985
VWA5A	2384.59945930205	1.50409721327542	3.34533093404107e-34	5.74016971644772e-31	2.35921480251095	2.34512705342193	2.86062348875893	4.45425479389404	8.60246879174192	6.56698950118865	3.66205461686395	3.73964692395876
WARS	13444.8563375784	0.67094907221235	2.19842153228585e-11	2.45347417672259e-09	28.1020014751266	28.6809263948617	22.5824203372452	27.6330446164683	52.2500456450456	43.4368774653355	30.4210884150437	29.1580288076618
WDR25	463.093453375703	0.41621962629503	0.00557964382191919	0.046047703580122	1.52007984720507	1.38884834084165	1.44727409033252	1.69710717961356	2.17072318497032	2.00140859744891	1.6584103893958	1.69432648287967
WFDC1	910.272551854225	0.477437302069359	0.00111430754038815	0.0132778642421078	4.23763623318914	4.0633798971544	3.8309112328013	7.20128013917998	7.29036500215336	5.18794182627278	5.272956055724	5.02396420636062
WISP2	36.9050690745976	0.634873794483326	0.002812394389501	0.0274773934410536	0.104568919488725	0.0509365227867738	0.0702163425182836	0.0534224249640883	0.285904840881078	0.247491403699406	0.293343343491101	0.324867402576874
WNT16	2640.21747226907	0.377387348971279	0.000188458004584555	0.0032176157076271	5.70617378541426	5.94032995368003	6.15778616929162	6.83354819044003	7.92104440571302	7.90838751655317	6.74086282408474	5.88180951749927
WNT2	1748.89450432653	0.625835251606039	3.24715406294893e-06	0.000107926595210896	3.91983598717711	3.66686893589052	6.23717736983101	6.96550341542696	7.38520348379758	5.2873846913928	6.42149467127719	6.51991472307078
WWTR1	1536.33592133518	0.500183923023363	1.21653139483552e-05	0.000323630357692	1.91864632271402	1.93451541814728	2.51934326840825	3.28951449675418	2.74460505546365	3.02396939271093	2.29329234324569	1.95685778798789
XPC	2540.97546710445	0.359753244578749	0.000886047442284712	0.0111177086291063	4.83078374802688	4.95784893647329	4.78605538313939	5.54734888561445	7.07307400752552	6.08996593499409	6.01680316909998	6.15171182135717
XPOT	11448.1760817841	0.422548729042323	5.65835218846101e-06	0.000171841151528771	19.4808858648241	21.1074265574374	18.017856833341	20.1502332720783	29.285797127788	27.5811304879267	20.3212021891059	19.8903001857278
ZBTB20	9411.20471069943	0.570743600158131	1.34923449021141e-09	1.07057467324462e-07	2.16041283374848	2.20590478270698	3.18763023927905	3.29130587938716	3.61657858368569	3.19801915508213	3.32756951807015	3.30656479641519
ZBTB4	3387.54392841164	0.563774854311937	1.42107504150722e-07	6.84459547184899e-06	3.72382071340597	3.55499760057632	4.55543456846081	4.88424129409315	6.19476918925366	5.17485464272226	4.88150296566418	5.11169094637204
ZC3H12B	112.07796470397	1.11662374951591	1.40317118685451e-07	6.78215876125067e-06	0.0618816753937769	0.0527266017987126	0.0213039247593717	0.0488045161151434	0.235634843239037	0.172359047986172	0.0649187901017104	0.083908215874367
ZDHHC20	2901.52754978113	1.89174782352774	5.68269628724252e-79	3.9003185967489e-75	1.70976169852177	1.71609568583512	7.46327430195948	6.84411359798554	6.96215707044837	7.18107676155509	7.15411628729996	6.59173616056295
ZEB2	4747.89321095435	0.433700294966887	4.40816561007692e-06	0.000140396494964097	2.78043857672297	2.89238036644085	1.61483732473951	1.47544530286201	3.96449145560598	4.0493842406072	2.36088541388397	2.15294394988369
ZFAND5	13203.6591520929	0.466994451579646	1.96465041298387e-06	6.96867085763038e-05	14.6386147914297	15.5599189943749	17.2765795010885	17.0987408600691	23.522879414423	20.2665653010996	15.7777643884305	15.1992182794748
ZFAS1	2743.29070800879	0.364255101054735	0.000416043485967516	0.00613429530813759	18.6069770443567	19.5770908243258	12.1977330302396	9.901595399885	24.9931083035349	26.4488586318239	14.1457122855515	13.8149887801233
ZFP36	655.833075906197	0.594197559884469	0.000186690415645875	0.0031914063954806	2.10154690672912	2.58655488271091	2.36148541211962	2.95070089243535	3.39134231211544	4.50096888313904	2.69298230729254	5.37885480248285
ZFP36L2	1950.6360419927	0.852115617446906	4.13149963854327e-14	7.22578335897383e-12	3.29900656592651	2.75782720232057	3.09748566910265	3.28979990717241	6.008199565341	5.73379681665588	3.97675236633603	4.03913656983969
ZHX2	333.876730487699	0.514581755994914	0.00161778082840395	0.0179090947028234	0.517330869386646	0.482728429590048	0.427636694885096	0.51382623437371	0.796900285072608	0.779692207889279	0.630954007777901	0.64978672351189
ZMAT3	5766.35759395458	1.05724924967069	3.37964796562632e-24	2.10874671018875e-21	3.13224451338936	3.43565281326658	11.6281660775238	13.7563731592128	7.91645772782111	6.84641285054161	12.1816568588412	11.612017734345
ZNF532	3526.88329219308	0.575999909667437	1.30399131635968e-09	1.04677712278768e-07	3.33461983774545	3.30003370048693	3.76852400518402	4.07559285096266	5.23763025367571	5.15579197402649	3.96457781911929	3.92926204841826
ZNF608	1585.63566664691	0.437359504845515	0.000530539764002809	0.00744833017032756	1.82415851443865	2.04607365035492	1.36757677348874	1.88573145576528	3.07678329728211	2.49452659852575	1.51413492842728	1.51465073860025
ZNF746	822.750760997895	0.385194007495124	0.00431987339874787	0.0383563403263984	1.68839555421409	1.36786010639451	1.77553108848404	1.6025655526094	2.16418398090334	2.06010957572094	1.619486842921	1.6109129385171
