# Supplementary material for: Integrated analysis of H2A.Z isoforms function reveals a complex interplay in gene regulation
Source: eLife. 2020 Feb 28;9:e53375. doi: 10.7554/eLife.53375 (PMC7048395; doi:10.7554/eLife.53375)
Supplement: Supplementary file 3. [file elife-53375-supp3.xlsx]

## Sheet: 201811_List_DnZ1
Table S3- Genes down-regulated upon H2A.Z.1 depletion in WI38 cells
Gene name	baseMean	log2 Fold Change	pvalue	padj	si.Ctrl.n1 (RPKM)	si.Ctrl.n2 (RPKM)	si.Z1.n1 (RPKM)	si.Z1.n2 (RPKM)	si.Z2.n1 (RPKM)	si.Z2.n2 (RPKM)	si.Z1_2.n1 (RPKM)	si.Z1_2.n2 (RPKM)
AASS	3566.16608090724	-0.496511262767483	4.3448017427527e-06	4.5908940289633e-05	4.67207152811661	4.66267429035631	3.2958505886252	3.29427766127316	5.2788992668967	5.19051998239895	3.32063065958312	3.3173562690848
ABCA1	7015.17914093059	-0.491768762868897	0.00390466101567231	0.0177753417155732	5.10020129070885	5.2075561797806	2.92306448469372	4.24350988655569	8.41128861151624	7.75329244731905	3.51158964606936	3.5193713726753
ABCB10	1165.63109845473	-0.969339670639427	5.4703764796099e-11	1.36507088351889e-09	2.53009040446395	2.74659714794526	1.46638739266405	1.18102280733194	2.3448193130104	2.42074632350724	1.36311487599749	1.21134819288305
ABCC1	1197.05164060554	-0.615681215026492	1.464620799448e-05	0.000139795316249359	0.730473938578863	0.725605842011208	0.440554460462472	0.492501079355359	0.64652549063123	0.670541251739189	0.529580043096204	0.469855549470116
ABCC3	913.142971346969	-0.968396837172021	4.2534355907649e-10	9.54025147016506e-09	1.58066662285799	1.46166850514822	0.693491287262251	0.803333951025594	2.03429871262104	1.82750349015765	0.900871821810322	0.905224254887608
ABCC4	13915.1119548334	-0.861386106424863	3.27729441664199e-10	7.46218972812845e-09	17.8617919379658	19.9014970321101	9.27589266272121	11.0884510448296	15.2334333082836	14.5755168568565	9.04677426485071	8.82021829367743
ABCC9	125.65127887399	-0.946545255142929	0.000422660680971019	0.0026700073377548	0.123812103387722	0.141872241262287	0.0687725179380211	0.0547255119887567	0.255079579557342	0.274153198837372	0.18495675666065	0.181438270499808
ABHD17C	916.887361847337	-0.907575314242814	2.12783755633737e-10	4.98769548517555e-09	3.36548677569837	3.33447528947392	1.69916110722369	1.78140089542889	4.11083498325837	3.96436960520089	2.1601629797447	2.22089032513103
ABHD4	812.66213238553	-0.765608025977131	8.94088686831181e-08	1.35414887899123e-06	2.69634746072904	2.6868863508596	1.56563693337699	1.54170618966398	3.62002813412861	3.47780797829956	2.24687672640227	2.12328920919233
ABHD5	2710.47569853887	-1.25632582847571	3.74667680088903e-16	1.75341881425689e-14	4.8035686168326	4.649311285531	2.26943206646241	1.56678969298968	3.70565759412521	4.3641210765786	2.37877175258717	2.20552274153823
ABI2	2716.4840777739	-0.941882482331427	9.4722843670261e-16	4.24214059814662e-14	3.3793225298683	3.41383899634483	1.70256131281719	1.77923783521312	3.23443092031048	3.16436637587278	1.75160320145546	1.7110564265892
ABT1	823.626769648566	-0.447425714900461	0.00274361561965183	0.0131679919289535	2.99827305864317	2.53882440100431	2.10147925508156	1.91660695574217	2.62897403025885	2.79697792972383	2.02445794769818	2.01195293807985
ACADSB	1085.74510390115	-0.502813635238226	0.000446428662854377	0.00279664088240178	1.32346813325818	1.49224034977149	1.02547062087172	0.94912786980716	1.27747957518475	1.52498904922076	1.13561054125914	1.04931355713449
ACAT1	2009.82760952421	-0.68867019461793	3.25471151476234e-07	4.3888308312224e-06	7.53265277991068	7.75851080094981	5.25809849271288	4.16421418940726	8.14978969639458	8.62974330351201	5.46499748617806	5.33703915261992
ACAT2	2059.73072628453	-0.538934933219876	9.4559887476354e-06	9.3488485242521e-05	8.18526327693669	8.61075380545361	5.71111923047939	5.76962451966912	7.72434171397195	7.63147824022957	6.61854190039061	6.3890066533267
ACBD6	2175.54866403952	-0.418595948154919	0.000270509830353154	0.00182022161966488	10.4411677858554	9.79645500131764	7.58501611884078	7.48812105752337	14.864994685482	11.9335615666762	8.81527606329617	9.54176020713832
ACLY	15096.5818498128	-0.392094412326349	3.74002066812494e-05	0.000320556270826298	26.3074986742698	25.1395406956908	19.7990076895738	19.3830254984788	19.057040336018	21.0909107331761	18.8244311870546	18.1342081767047
ACO1	11591.0427060124	-0.510966302191444	2.46281619407637e-06	2.75285859709776e-05	23.5862982042729	25.7783339581357	17.5128480759262	17.0407357519774	22.2135849052602	23.6244960252563	18.8533630645405	18.1075562469299
ACOT13	802.410656882055	-0.391400823779623	0.00772533323885148	0.0307935408445645	1.43322699512215	1.29883495134702	1.01838471368311	1.04036843596657	2.07105021348229	2.05367005335925	1.24349398516404	1.36182455537838
ACPP	263.617051254406	-2.56315550320973	2.44609178888685e-32	4.41111885929262e-30	0.807549921000459	0.780911059403096	0.109554413929129	0.110192059389119	1.12460903757986	1.13772037985074	0.236802912250897	0.178531656346351
ACSF2	697.297409916275	-0.402815995798778	0.0106341402986017	0.0398632892290985	2.28458431742548	2.04092812527451	1.54551268099031	1.67193498349571	2.8628878653521	2.91052871213653	2.1783526627523	2.05304826202232
ACSL3	6223.58691279534	-0.424489226320684	9.86868486975179e-05	0.000748172437575073	10.4196651661805	11.0341344686935	7.94413949021063	8.00576680566996	12.4837762058302	11.718478342842	8.77704001393295	8.5935856242059
ACSL5	189.615043177453	-0.876242301120532	0.00109210044594921	0.00609099320885075	0.442404027095814	0.445742191325979	0.286585451394736	0.156024533393089	0.531057801796189	0.390135666602874	0.275980927647718	0.277509430330128
ACTG2	23345.1567545151	-0.771089962264046	2.42743466884963e-12	7.27961283729297e-11	145.173139675558	145.623653441675	80.7440723613489	87.9884710979199	84.0901130199172	94.6579786599099	105.612816092377	100.490192963147
ACTR1A	5919.24761042795	-0.675337009334642	4.01535802450985e-11	1.01890651560029e-09	16.4657361889778	16.8018012012157	10.7356461816747	10.0177605081482	14.1777482264838	14.6509078865228	10.8000585324669	10.2848928336778
ADA	197.225263188312	-0.713211289939494	0.00268039424065755	0.0129011858024531	1.21043416813892	0.906035851084636	0.647833642829954	0.561438011812195	2.01605831688217	1.74637486341602	1.23375540878956	1.16809771415215
ADAM10	19555.3988803463	-0.641945889718263	5.97521731394018e-11	1.4883022867595e-09	30.6755482528033	31.4679493477963	20.0086098881041	19.675446481386	45.3800877335777	41.3355435688952	24.1797836685016	23.0663483969633
ADAM15	2322.97021250246	-0.490227520516188	0.000221301160486599	0.00152783412178026	5.5543848018478	4.87400340048033	4.10035550638019	3.29190535061914	6.89822822136807	6.17310871696752	5.27881798682303	5.10831112866336
ADAM33	4380.52794962071	-0.76231521262983	6.56214946223812e-10	1.43150115285114e-08	9.39525610714385	8.2029837967165	5.65724018084203	4.62223135719962	12.846039529524	12.1846117712296	9.52553235610233	9.57705058033176
ADAMTS1	10100.5279929973	-1.16683204617106	9.38897033611e-26	1.04946961814783e-23	20.2200322057122	19.3633641703318	8.29143890911531	9.0267799529346	74.7351521722179	53.6048093422916	15.6901476862201	17.0574586962137
ADAMTS15	1768.84924429191	-0.94991280580031	8.30832731203432e-13	2.71425427283247e-11	2.87900107351131	2.5388182396404	1.51203231287214	1.2491794119117	4.63890167464215	3.32970962156333	2.78101064212785	2.82454470911117
ADAMTS2	6497.13002930322	-0.486465882144454	9.44555304879505e-06	9.34536247146694e-05	7.35840271146582	6.34512238444106	4.91085378188131	4.81986044711276	9.93036889720354	7.31728267170158	5.89740280302145	6.24029400668913
ADAMTS6	3651.55961579945	-0.409360734319607	0.00720665040361282	0.0291041942994516	3.59777412114565	3.73812743295658	3.2518555680196	2.26010340528688	1.98438210940505	2.85408083759134	3.30015976295051	3.24330922592935
ADCY3	2173.49467233431	-0.410496453938322	0.000312236782629936	0.00206201293216303	3.52564321447785	3.35668671169408	2.6960063287475	2.47343703726227	3.83718611103293	3.63958496471408	2.83705539261904	2.9299028817104
ADCY7	2766.01633941111	-0.720102886083016	1.78045210489119e-10	4.21727052866082e-09	3.76885834798866	3.46452110726675	2.17018829061239	2.17629646339876	5.01563299436043	4.39545230629553	3.126850848271	3.03738632655056
ADGRA2	8633.86573549292	-0.390889128629477	0.000472423365649145	0.00293097523871775	11.587070123586	9.75121228570002	8.42995251841607	7.79752622466969	13.6882449881015	10.7983503735585	10.6547611121813	11.5148043568724
ADGRA3	1727.14738682029	-0.722376821639679	3.91935370921083e-05	0.000334443273924772	3.0019437119775	3.24108860275693	1.52711704513735	2.12207993749024	2.54947054357732	2.47294124517239	1.56376987970973	1.58960620562374
ADGRB2	388.069029129032	-0.719625636594871	0.000289480193896043	0.00192772999627965	0.674987519157951	0.511696697385001	0.330959051196932	0.354414887206751	1.03248138704903	0.809025276799663	0.453900292984623	0.481737239642394
ADGRG1	19.6916925620606	-0.900523693396463	0.0126485491586567	0.045741076837121	0.0417575934183701	0.0394357096505812	0.012684558488008	0.00904757153558677	0.0416272400432165	0.0475630193968758	0.0136266108744073	0.0184633844277594
ADGRL2	528.293997262542	-2.57653459285713	3.24940205069066e-46	1.33176250713913e-43	0.923215646222677	1.00100418704035	0.160113942560101	0.129363327771286	1.39447712587675	1.08657112520016	0.250536909694641	0.275432875153893
ADH1B	109.69437340707	-1.54682668548226	2.81719985336309e-08	4.69822786889468e-07	0.42905019217821	0.377399087364194	0.103403171071701	0.111861507993834	1.58359054659548	1.16367068013359	0.34289063956833	0.428017206737902
ADK	1274.02091437461	-0.507847659861793	0.00018595362458868	0.00131676584950885	3.92331908117442	4.13247863179814	3.04591814799024	2.60106318086221	4.00305967924799	4.5092129314673	3.3424423353662	3.29397895369926
ADM	10129.4984403217	-0.588723478289234	5.37358814947793e-05	0.000444200618272578	53.9443675961661	47.0036786233032	38.9970305235011	27.4993171466116	69.0056842952191	70.6887146286683	51.1284533218169	50.1746121370251
ADORA2B	2011.9142286645	-0.55811155666939	0.00111037672463858	0.00617256276232504	8.9193945271731	7.87704276217353	6.8209682374273	4.44613888490453	12.1649787592348	10.8180742732818	9.68944965612337	8.58032583990019
ADRB2	253.486002514912	-1.02673996195262	9.05405045767499e-07	1.10619722168071e-05	1.18740086089575	1.04661832668338	0.521000447436716	0.500993840038007	1.00021347084796	1.21556356800619	0.777618439104643	0.862064641582487
AFAP1	11285.196897004	-0.578563051204003	2.91361089055349e-08	4.85302799196255e-07	12.1483400851639	10.7187422784301	8.01987658796329	7.23489884583967	9.56956217908274	10.4732745219405	8.93817167617386	8.75645406788384
AFAP1L1	1109.09212032367	-0.928977173715083	3.46274230704424e-08	5.66307009707053e-07	1.58486665229303	1.51372623969507	0.939445848185964	0.648790376592051	1.80402124109187	1.87741386990386	1.13951662373077	1.07030793799473
AFF3	1470.96634606248	-0.570863698215945	0.00377678899900992	0.0172629741716991	1.39974963205376	1.44424146397896	0.717520043687809	1.12230211093663	2.6972233921769	2.08677476981819	1.12872174471893	1.15561759120698
AFF4	13389.1715358419	-0.605100236220839	6.434811985131e-09	1.18248413177849e-07	10.8904766729022	11.250168479415	7.14817392253889	7.33772847495105	9.58098453463742	9.58671083686218	6.37864689488541	6.10039995578276
AFG3L2	2219.51232738132	-0.633470844721902	9.02430827826404e-08	1.36525469198569e-06	5.36994013439329	5.67950165582779	3.66667596285956	3.41625399362855	5.63662704286763	5.72096949647073	3.80708285915943	3.72444840590404
AFTPH	1593.44012036921	-0.493345893296105	0.000477443580521475	0.00295352240781673	2.86539956882625	3.07015783313184	2.34217399228645	1.86389219433412	2.43935230278132	2.36182057686339	2.03806388834344	1.94697959339518
AGBL5	901.388826396397	-0.344896643897146	0.0124159927691564	0.0450808864974069	1.88477901550828	1.85223980323757	1.48943966814333	1.43869192267566	1.74927339129115	1.72796087415982	1.51009382026382	1.63252859914182
AGPAT5	1081.37674901879	-0.431035416356176	0.00493930626130944	0.021515013585897	1.44093619623452	1.51431171969996	1.23568803534849	0.952600593805674	1.45786548930855	1.53434594812709	1.15223500692211	1.02762429064701
AGTPBP1	364.719537135266	-0.685836312460009	0.000258453005381227	0.00175216887106822	0.637506531691274	0.674305746025923	0.42870797537105	0.366753215555055	0.73461805440411	0.75508237099568	0.530609573268339	0.440312174545463
AHR	3896.82471784	-0.357802207631532	0.00170171719445112	0.0088216654101002	4.44197701063195	4.74315486095492	3.79615601997039	3.38040426164893	4.10293314212226	4.3951878425818	3.3737348907424	3.1092134176026
AIDA	2208.38775602669	-1.13756814475805	1.53105127339453e-20	1.0841606530189e-18	6.42633261897263	6.88374232258256	2.96143147459722	2.97133526086516	5.8860195270915	6.60276101054417	4.10714835967456	3.84827753602919
AK2	3422.1984791198	-0.691127067387714	1.52889710177626e-08	2.65447154063208e-07	4.65966311169363	4.96406909390975	3.22848562011527	2.70101862095198	4.08877559019507	4.58400957910374	3.47427601142803	3.19938911222623
AK4	3791.93627038449	-0.495743690185981	0.00224922155912872	0.0111512909044047	3.90911873002641	4.02906926868423	3.37221994412785	2.21865882659941	3.70751049200606	3.51459917515036	4.12688353960865	3.87686157401213
AK5	3721.35846837621	-0.64416613583204	9.87658081284031e-10	2.06781355253352e-08	6.87071694692748	6.87930346660002	4.50350775469083	4.25625147764923	6.16242982462967	6.59140018806214	4.98619398773092	5.06678042661312
AKR1A1	2181.91306259514	-0.64514243639959	3.31139975014522e-08	5.42868868129868e-07	11.4432116346403	10.7085173625163	7.47008558876001	6.61471161700964	11.6390251056286	11.3776690785069	8.24194538624245	7.24607708368894
AKR1B1	10350.4500395799	-2.04380676994484	2.24150879997578e-78	5.05273441994541e-75	52.1999461056855	52.0585667458328	13.4147921907744	11.2293400892039	43.1390750418682	42.1259260779549	17.3509659818421	15.6197800226947
AKR1C1	248.404377433932	-1.43853115728757	1.90566455121301e-11	5.08365149016884e-10	1.82340481891267	1.71244969754722	0.652798128539271	0.535546251273877	4.60599435261093	4.70073288108665	0.831933634560804	0.65746136118378
AKR1C2	74.0014391186019	-1.63295472670765	2.15407868160442e-07	3.02532857411212e-06	0.182511144195484	0.201619138871883	0.0350152254387205	0.0466208695354474	0.281157989669438	0.248149150267345	0.0804558542099782	0.0637093093061693
AKR1C3	37.727228683605	-1.18671410901358	0.000793167556265443	0.0046219694952564	0.21669559793784	0.179898537296924	0.0688864875463464	0.0351588020608825	0.394639628586287	0.477342462667046	0.1112778713617	0.13035069477927
ALDH18A1	3987.36528549895	-0.529716811681305	6.49639101523409e-07	8.21155967112533e-06	8.15233447267729	8.24928535385417	5.7051383448885	5.61439042144777	7.74470596046484	8.11646743734049	6.31017237125059	5.64733357052397
ALDH1A1	186.199654877504	-1.63411249060871	3.42080941249934e-09	6.50723590774312e-08	0.774996222925127	0.857599893572504	0.284036813150153	0.144372609486701	1.17892628681905	0.874489779643301	0.477856182721194	0.595015770109745
ALDH1B1	3636.38998080873	-0.801188516339508	1.668115106606e-12	5.19844627116269e-11	10.2478419528071	9.55278812708291	6.08669335889965	5.19569517043598	5.69527335762221	6.19767770746204	6.30327959057998	6.22332299790321
ALDH2	1765.62079239229	-0.825466947440377	1.43174803798644e-07	2.08668019544899e-06	7.30433940106932	7.20787650810539	3.47829946049552	4.44897611287247	10.2226951679492	8.42996057855686	5.09333756099775	4.91195295480033
ALDH3B1	1132.5307642028	-1.12323458425697	1.42529708994482e-14	5.70329678742712e-13	3.80403715552537	3.08710309619412	1.60536670675847	1.46215141347534	6.09848699340199	5.41148038078822	2.59107177995145	2.72250047944087
ALDH6A1	1235.37271349819	-0.518472150255432	0.000282066125305201	0.00188485392527314	2.0153779175547	1.93247723855165	1.53082346742151	1.21330840018033	2.5570192775986	2.44235466765891	1.81044345963783	1.55648795848222
ALDH9A1	3682.26318714731	-0.442041205709209	9.34284836697957e-05	0.000715121811903784	10.8082523241584	11.4458645369795	8.63836553831184	7.73749234543963	10.2462201358155	11.1469011882009	9.81608963457403	9.16168855558449
ALDOC	1168.41959671042	-0.936738993193246	3.90198544068582e-11	9.95742511042938e-10	6.47879943598583	5.79721492791481	3.45876091559172	2.8415548817541	6.32602939239433	6.82909083476416	4.32110202788488	3.90414390494833
ALK	206.472866609821	-0.959986858595247	0.000299745056710308	0.00198630665948403	0.334460660452324	0.257955072101735	0.175619310309696	0.0990385353864618	0.0777972031794639	0.158479221444127	0.167353196856488	0.177460679441654
AMD1	4649.67025878735	-0.51827518404172	0.000262448278504529	0.00177391952362507	9.79329717812099	10.1132016309622	8.02236268897949	5.81751547662805	7.84769312153511	9.00327519414019	8.09737895295569	7.28543818135498
AMOT	622.266815776135	-0.88702512939147	3.62675325271665e-08	5.90985996903527e-07	0.72005343965554	0.729645344655409	0.364410078717959	0.392989301317681	0.671418396336049	0.71607832200797	0.571928172706371	0.562683621530462
AMPD3	1693.69013327057	-0.882492741047628	1.43487951468469e-11	3.92055463355766e-10	2.59370036057728	2.52824362453161	1.29831369778108	1.42163041433112	2.28718217240428	2.4495538285653	1.18414502032904	1.26649271567859
AMZ2	1573.38337109103	-0.989703035107037	2.91941739819077e-15	1.261505441231e-13	6.96953516158216	6.96940259305861	3.39840005228642	3.48530733473096	8.1116026628231	8.0810703780805	4.25925645556852	3.96399805149268
ANAPC1	2261.50656609512	-0.964564021804023	8.22601966493647e-16	3.72731350014731e-14	2.57577798748856	2.5128278539962	1.39286768123055	1.18666292190268	2.29714835766962	2.58786748762357	1.30031186629517	1.32253435411837
ANAPC13	1016.5449864914	-1.51880747039136	1.18564684363769e-19	7.56409130198104e-18	5.55782104005711	5.30352347286317	2.12762760558455	1.49035278924271	6.09427849698365	6.78956162968328	2.07057083789501	1.77480750546368
ANGPT1	1207.69473614516	-0.920347944387535	8.34257178393946e-11	2.04779098689258e-09	2.24667511957615	2.39278250096642	1.14799584135916	1.24257418232816	5.15365402302546	5.30498402608409	1.78498674692497	1.39298974560055
ANGPTL2	5199.30874738811	-1.17830019116705	9.11720578179606e-31	1.45070833175049e-28	13.7435990316887	12.8287668202865	5.89569593526558	5.69500183954135	19.8653904774178	15.3171873098815	9.77349887473341	10.1786724372777
ANK2	241.424434669141	-1.66461027472947	1.34567624502197e-14	5.41674738509587e-13	0.164915524332941	0.175343568937571	0.0488434182065411	0.0462730229798568	0.423027389416266	0.357653466966287	0.124001752313989	0.144469666539807
ANKFY1	5490.24847712295	-0.621737128704353	6.39059643269984e-10	1.39858926783601e-08	5.77705102783387	5.45861007505626	3.70919340885717	3.56157252340144	4.99626150093878	4.81084641078907	3.75339235839052	3.60275284406881
ANKRD13A	15605.2623458511	-0.707731777739508	7.07964613300599e-11	1.74094934452556e-09	32.2959795307489	32.778851533068	21.6017307702654	18.0820619064187	27.3232262442639	32.2389379724514	28.3509961191366	26.1528589463997
ANKRD18B	329.718143196459	-1.09180138180761	8.13690486859789e-08	1.24071745600661e-06	0.832171037532746	0.764556799863026	0.407041499554431	0.302429482850882	0.437020497121458	0.633404067168103	0.491930455883279	0.550161205783011
ANKRD35	132.608479386651	-0.75698585370632	0.00327418293939918	0.0152595879584334	0.350107942812667	0.321674062130688	0.178453487809625	0.183600865278564	0.289859933344836	0.332138377234876	0.214621259785862	0.234171494498133
ANKS1A	957.445280891483	-0.650563087310487	2.51235249169963e-06	2.80128338419105e-05	1.26788027566052	1.16221649902264	0.764552154647594	0.759180573633129	1.3886962053921	1.39497340688087	0.888838182827855	0.884666355542026
ANLN	8199.53397090339	-0.827689568696514	4.13347258070549e-07	5.46483056246742e-06	14.3630138981754	14.6095890076644	9.75743300009293	6.22782793103272	6.81264207132512	11.3047450866283	8.23997777419613	7.39978307398312
ANO10	3378.93133825758	-0.43757018493315	0.000177912284980059	0.00126313052722063	9.0271174449039	8.84973895399339	7.18775224225704	6.01100786631338	8.21630358713209	8.43628374804688	8.16994102256886	7.42474072262755
ANO4	1375.41923700894	-1.26650949654279	1.33935782256554e-23	1.24929755518613e-21	2.29128862573632	2.32795884180554	0.968632420055079	0.90888716013755	3.24631780534735	2.8650872398725	1.3858622400102	1.50057643587894
ANO6	9863.35829798155	-0.754864702550677	2.19041542283977e-13	7.51912908474821e-12	11.0717170627664	11.6663685860372	6.84550441460841	6.55738724380918	10.2014070591654	9.66563432024255	7.73673486261986	7.71229111517274
ANPEP	4147.51679433371	-0.602212051731816	2.68003747160159e-08	4.48607757467964e-07	9.33018483598891	8.68359560623645	5.83696912942023	5.94562774672454	13.0100369448529	11.6602339647654	7.97434992791321	8.28948005290503
AP1AR	963.449866623724	-0.437523727649074	0.00447092671869376	0.0198977571142919	1.17448182626644	1.26638837315826	1.00169546377756	0.796770857656515	1.48399657931645	1.52391020945348	0.968170753400208	0.876603883014904
AP1G1	5813.27536234789	-0.538212751919483	3.29647800401465e-07	4.43630497555206e-06	6.47088743573088	6.7243908574611	4.56377003737977	4.49322097132038	6.18987756712671	6.30833715995439	4.27031745087891	4.06944724986784
AP1S2	4003.70336574704	-0.605545581142347	4.31169411729145e-06	4.56661416886193e-05	13.1441555618952	14.1243653363351	10.0027084175069	7.83514826101182	10.9885533879735	12.211276910993	10.3900096262757	9.01885422767799
AP2B1	12904.9751323405	-0.975758304374305	3.16329430190692e-17	1.64552136281889e-15	18.9692529431692	20.099023346795	9.37544736908755	10.1993390619637	17.0450001821744	17.7883163772991	9.89414062747329	9.78374013111217
APBA2	142.397221743629	-0.989875071558433	9.80032180581299e-05	0.000744659283278768	0.186454848356952	0.166764971827871	0.0874568761923937	0.0727775482639509	0.136063747614415	0.149538446672282	0.0970838295502908	0.0927474662580641
APBB1	2576.98543051614	-0.344009240131883	0.00651459363614337	0.0268055609762212	5.56575775404169	4.90707754297196	4.51381757722105	3.7323337679295	4.4865707314794	4.43284289169231	4.81362960132664	4.84073365972116
APBB2	6646.27950444481	-0.512363619632457	1.012215857105e-06	1.22452768044232e-05	5.47496583505842	5.68389842982098	3.91665673495636	3.88377275995275	4.35193891482583	5.03056307374869	4.43254912497607	4.30312133120748
APC	5294.3979634018	-0.717414939091217	3.14648853039045e-11	8.16818759568729e-10	3.75690232803049	3.95447438558895	2.34297586208811	2.31618121710963	3.31850034003288	3.49920624826003	2.76442362571221	2.73421059846312
APCDD1L	1813.4969344387	-0.748615476850946	2.08879162257274e-09	4.13629673430401e-08	3.9872030702157	3.56771535789661	2.38106735056766	2.07151256287594	4.05170869636471	3.90158824177908	3.13180280084498	2.99504068630069
APIP	647.046581453611	-0.882955931341528	1.12128875952769e-07	1.67892568238975e-06	4.3209680757236	4.36480528367243	2.59190129493097	2.0170194510417	4.61645476345276	5.12105852665507	2.90933655414969	2.54451214686888
APLP2	15893.1357194154	-1.03279606702103	3.72723761714567e-21	2.76982905340083e-19	34.6283241563654	35.7309499629221	16.402507710522	17.5218854332736	40.521661115149	38.7446154191824	25.5752628533782	23.6463836291583
APOBEC3B	196.465411549159	-0.856904890083507	0.00111897602993183	0.00620506388061826	1.06398213569987	1.15799448585146	0.721292584815581	0.411302523571957	0.59859782723803	1.02420684447416	0.57797030805012	0.593795202585572
APOL3	324.79014686123	-0.997829761499289	4.35256380661636e-07	5.72093542123288e-06	0.701070015761496	0.704847647960136	0.372682787955057	0.299791654387626	1.06261266227763	0.878058591975976	0.676536057012229	0.568301338246103
APPBP2	4912.0594748098	-0.359946671496942	0.00159051827485693	0.00831211733672333	5.30147679737898	5.8350533928913	4.45206617097501	4.22547753818184	5.69613030049568	5.63644569704095	4.25530651653594	4.03748189861011
APPL1	2552.37660540492	-1.42694405662655	1.55073978737272e-27	1.92419776368955e-25	4.03898041848267	4.06226334054638	1.64754652789064	1.29509407384746	4.25507480723235	4.42999011557668	1.65492115961613	1.56162713547443
APPL2	4991.12605143533	-0.360114530749236	0.00194994639437238	0.00991094512735301	10.1629074227657	10.5025806183366	7.72766026559767	8.31390752326834	9.91435795668762	9.97555985691503	9.50818562656039	9.30170220514317
AQR	3152.97894563269	-0.407793266513603	0.000454524990456776	0.00283946905123691	4.62959173316329	4.66543956009601	3.39198149504785	3.58022165641911	4.35101958635033	4.44266764466495	3.71953007623925	3.46783377758321
AR	2128.81967026521	-0.613521288829512	1.6888209865967e-05	0.000157852825457639	1.57340215137527	1.56051496153117	0.913664404116277	1.09668821887686	2.01371706138376	2.1537226817142	1.33683420200886	1.25419546517644
ARCN1	11092.1926224205	-0.44469317328738	5.77454829442186e-06	5.94374168052174e-05	20.6843162213823	21.0834514075929	15.8125629385838	14.8704771056027	17.8180354318929	18.8345187884716	17.1688561960932	16.4876459415432
AREL1	2669.25946434245	-0.498422869974526	3.36329412560231e-05	0.000292342885917553	3.61189871911613	3.92505899556925	2.66528082724773	2.64483130759967	3.81212645723496	3.9888121306429	2.49346151878819	2.48790556842113
ARHGAP19	637.498729294793	-1.11698168787361	4.98503841137401e-13	1.66887733945132e-11	1.02559922439031	1.05018936477737	0.477117839350652	0.449248154963336	0.856367256801478	0.977844397916321	0.431417656867668	0.467348997330114
ARHGAP29	8821.89227102619	-0.563097329578107	1.57779487998592e-05	0.000148812243736468	7.3466841694614	7.50855375379634	5.70791083623583	4.30525972942456	7.52549665252244	9.34285236711577	7.95328360598024	7.6730433840994
ARHGAP35	7358.23571000238	-0.751055535953764	2.71683403767418e-09	5.27947993671599e-08	6.97948928817405	6.70537658612916	3.6902013947476	4.31293161096609	5.92075501980084	5.88944357066475	4.2125265881138	4.12868204046679
ARHGEF12	21596.1240692984	-0.658067060657859	2.9304391681046e-10	6.74050846064876e-09	16.7114360280535	17.9150007162691	10.974768094552	10.8674202842894	16.8926184225006	16.4740781268487	11.8125811053092	11.3774467777881
ARHGEF25	882.361474553348	-0.362959216912737	0.0109767603363546	0.0408660537642029	2.32686302318419	2.10471925282891	1.81798595850419	1.6130147301641	2.79942587453538	2.58276946874159	2.08379321721214	1.88021125933376
ARHGEF40	4602.32681362274	-0.66899202998457	1.32483404617128e-09	2.70670399916414e-08	6.54535134991681	5.87107468114055	4.13249866142694	3.63407998392222	6.01210691226176	5.30540027011059	4.81879055906575	4.83425919670304
ARID5B	20546.8315011579	-0.357610746074594	0.00631136570433255	0.0260644950079688	17.9991669803598	18.8934346874572	13.030666609187	15.578329553791	18.553847893324	18.4091240958932	15.7279601302067	16.4075467162883
ARL10	340.969019038253	-0.804373937369498	5.42116172390966e-05	0.000447080562901696	0.953915805475803	0.746675649425942	0.461317252084565	0.462439334820416	0.952882654778771	0.890292686968449	0.550324155811033	0.520108975694954
ARL15	525.484699436706	-1.23809140237917	3.82410142718274e-13	1.28659133837429e-11	2.04297702027834	1.91308031550269	0.753484058471541	0.82912003782666	1.94812903483321	1.98540670312842	0.91990159755522	0.875807595283456
ARL3	937.449053149191	-0.611219320164841	7.18339880370519e-05	0.000571912138000608	1.83643997210243	2.02281370280176	1.17828967753513	1.29928389820599	1.82328966959362	1.92957743039906	1.29633678529512	1.18724164439957
ARL5A	2235.35724431614	-0.779051589098968	2.52466663926457e-10	5.82698230308077e-09	5.68016717316834	6.03843717648274	3.62400746537605	3.15278756285602	5.05350403108004	4.83216983349916	3.82636724010273	2.97999590642552
ARMCX1	1527.61891763458	-0.359542089874886	0.00405742686792819	0.0183472746201032	5.43578281393675	5.14590221391295	4.05412965525924	4.14488155941375	6.52506463641562	6.22134105116919	4.79079326872211	4.37463870177752
ARMCX3	4975.90337042596	-0.637646894282707	6.78942766962376e-09	1.24090553015759e-07	11.2451336870069	11.7210084035678	7.26129184917107	7.40474944273543	12.4587786563592	11.6105116171944	10.2529128371884	9.01472936788506
ARMT1	1872.75825471064	-1.01964006944778	4.33489079549135e-12	1.24743400019193e-10	5.88028011979523	6.82941751590128	3.4164310396785	2.73020556770825	6.20584374498036	6.12494746564708	4.16218480310958	3.62288567746989
ARNTL2	6434.94244771664	-1.17485074198376	1.287428043826e-22	1.14555686136491e-20	7.7181305399499	8.06015047813945	3.80504378684937	3.08201156957777	5.05616211645385	6.1880101621937	4.22950345507288	3.71784772118133
ARPC1A	5372.23645829165	-1.29263171014224	1.7589966719723e-32	3.21492297140882e-30	31.1760556655746	31.3025693833017	13.5235277480531	11.6397598965878	21.9048372154859	25.3137054564316	13.1054926429838	11.3989314670601
ARSB	1519.53625161738	-2.05322726097869	5.31250541486405e-39	1.33058584696363e-36	2.44446435183938	2.42890862301313	0.4765731842829	0.605977384166646	2.86845958852876	2.64618418208057	0.634839273555271	0.628285123637177
ARSJ	4343.91555110006	-0.717806255940834	2.97291250479609e-10	6.82659450379747e-09	7.65739507671612	7.52269179226876	4.99940959126439	4.18550974267209	7.79107521352232	8.47951232313628	5.59019104678837	5.60631877940546
ASAP1	10507.7776205277	-0.348737484362018	0.00299395669079526	0.014158484001051	12.0913027555213	12.2529065732837	8.98841657767515	10.0507326966756	9.21894269612669	10.259929389818	10.0255657740966	10.243727331318
ASAP3	1571.40944073246	-0.602960147736151	3.00136249973309e-06	3.26839193308293e-05	3.11454406929881	2.90096501296244	1.89218837468346	2.01416462246118	4.00054545941839	3.57776913251408	2.55448922557843	2.41473357992056
ASB13	245.584995767877	-0.648772023820537	0.00375658760680775	0.0171822277247463	0.746223660161614	0.676541507783304	0.50840582902795	0.366482496398274	1.06624834913165	0.921366149449925	0.514082120128102	0.473710365149518
ASF1B	305.498623823504	-0.685862821737413	0.00608719697950202	0.0253156960541121	1.44108555317172	1.47473151025035	1.12415106886724	0.599747540542731	0.656999103684843	1.22437928032449	0.921718339253669	0.86019989222422
ASPH	60093.9451449896	-1.52581131707974	1.55808125862535e-52	8.78043709287826e-50	47.93257928204	49.5567919487747	17.7001348050649	15.6716035508526	49.8741586314344	49.7621484267262	19.0157646660323	17.0854080218403
ASPM	3871.2160498628	-0.917519970207233	2.3573302161529e-08	3.9853613966835e-07	3.18184066469499	2.97765565116281	1.9316813769012	1.24927019692194	1.74653895467522	2.72779647567447	1.73541631036879	1.56571127872551
ATAD2	1779.13044430325	-0.472562814764604	0.00317524262628309	0.0148908309710398	2.33670623837523	2.55125699430433	2.05426340036664	1.45351914349407	1.46832200393352	1.98864095697738	1.92261149815936	1.77933780342394
ATAD5	525.199920936445	-0.677637668708625	0.000294898287827896	0.00196091413120565	0.64679446245035	0.59957444040111	0.446372397962371	0.317000372335499	0.370765970093211	0.436665792505324	0.433831944325776	0.387524750281091
ATG14	1964.90023153893	-0.644677059767297	2.23273800882433e-07	3.11960553402366e-06	3.21242306920427	3.42678329812062	2.24305906317895	1.98079719093602	3.1807240810776	3.32318113372673	2.04236360118805	2.08315035309683
ATG3	1823.14355062955	-0.421804086129404	0.000472285461015862	0.00293097523871775	4.45426546458822	4.49883520776196	3.53320145340653	3.14441981909719	4.43963836096257	4.85142176109318	3.65478964115345	3.43001239987805
ATG5	1621.70123115055	-0.660807360236471	1.37984853683441e-07	2.0285273326832e-06	3.82825139231207	3.84460015468867	2.58579313534723	2.23891495819264	4.19325553858759	4.07227529842862	3.00421845910126	2.78204413791986
ATL1	523.286486227015	-0.61990316145621	0.000434976476694678	0.00273885328086384	1.33789969753438	1.5236033290688	0.874865442656158	0.938684157732449	1.37784128865437	1.47551099002506	0.959095619472953	0.939272150712449
ATL2	1340.35561781797	-0.436117245514338	0.000519537089814512	0.00317091116414317	1.50161286249372	1.51209746045941	1.13967248762297	1.07903850300239	1.40726444949469	1.45519107404303	1.072122325306	0.924010215081762
ATL3	22133.117061252	-0.44316211051062	0.000141577575361951	0.0010276131221155	21.7769987214938	22.8399042269057	18.1363374748853	14.673229949471	20.8200735036024	21.6935669450417	19.5763083029578	17.5148638270409
ATP11C	5598.7208837974	-0.734756858991632	1.81048279980851e-10	4.28090557122555e-09	7.35226679906601	7.67014282316306	4.88389208012469	4.09679974227876	7.86927710345237	8.15492549819543	6.37686138977023	5.7145899306267
ATP13A3	41340.4147747019	-0.781841425381195	3.67566122110429e-13	1.23973361634503e-11	45.4541683117788	48.256898848876	29.178804532493	25.0418475893269	39.3750669934839	41.1759985672889	38.7769597023317	35.3575712264725
ATP1A2	146.841828323842	-2.54694610515363	2.78399617020001e-21	2.10355017888017e-19	0.352898797771866	0.278018019278735	0.0383249727305677	0.036606769552598	0.803847407233658	0.768016643250259	0.155933731134137	0.146738930732193
ATP2B1	6447.55889199278	-0.363868785185988	0.000656312511355198	0.00390181394113365	6.77870181789389	6.94260103524794	5.69608683609106	4.98296792348734	9.72502444043111	9.54134119088407	6.73734303804807	6.06130947663817
ATP2B4	23290.6911764907	-1.25182420593576	2.99278092805306e-38	7.22810036641388e-36	23.8545379589331	24.4824026970037	10.2174106432027	9.86057360119277	15.8459471520862	18.1015539710488	13.7020708630719	12.924008347846
ATP2C1	6906.0894526648	-0.439226664671205	1.70935462110993e-05	0.000159661748967623	8.28284193801676	8.41514177373393	6.1794653987772	6.1154652662676	9.16611063358676	8.94759146193826	6.786128343127	6.41858156634238
ATP5B	13305.6586146983	-1.17933053109585	6.63374057891997e-33	1.28173344756989e-30	66.4140330074689	65.2756099754644	30.51069622693	27.0926235590552	60.5948846666985	63.2847842257548	32.5216538215701	30.0224978076153
ATP5C1	4775.0154950337	-0.911782505312709	3.47981211986204e-15	1.48468324672347e-13	34.1910876301763	35.7729981048115	19.9937740185285	16.8793553173489	30.437713211524	33.3895350592529	21.5934990944313	20.6608760074987
ATP5G1	1207.32441006928	-0.407553882104817	0.00249272051876312	0.0121711353849355	14.5037363956365	13.4988881804534	11.3873842602155	9.67517795035202	12.4789978866763	13.4483480194121	11.666891417412	9.99841671219513
ATP5O	3605.49732769741	-0.380717501234772	0.000907702825059178	0.00519964145662335	31.9645076771163	34.372673379313	26.7713744579	24.2062036577413	28.9494825594693	32.4190153925485	26.3559167488697	25.6173077581097
ATP6V0E1	6814.15150005822	-0.331183363956876	0.0048566066053374	0.02123685882224	56.9949532345478	55.933759504462	49.8260181962778	40.1022481785111	59.6464825586064	56.2528067682684	55.6467666359072	52.6498120247385
ATP8B1	12124.12876348	-1.08798564509631	3.1277678580397e-19	1.94050735229298e-17	18.0892543153896	18.4913559954477	9.50647449288967	7.46688064310878	12.7421634510341	15.8717574653051	10.9882326066101	10.5809087171891
ATPIF1	1343.06893409881	-1.37925544200103	1.69224729126611e-26	2.02545527560833e-24	6.87839342504086	6.42837439941008	2.65468841150034	2.33489386108668	6.30976854531739	6.24388738179544	2.78644175224529	3.03559552061791
ATXN10	4899.28831795861	-0.41090850091488	0.000101659768505762	0.000767698698515035	10.7960988473544	11.2255606801585	8.5332360699303	8.02579187819864	10.8008969581344	10.874233999376	8.65167301069755	8.96285234649979
AUH	688.946950420339	-0.579498682169201	0.000217083956867628	0.00150335919950572	3.1590113186609	3.49808831657583	2.28856688448523	2.11295423232312	3.35422030119746	3.18033435016378	2.58215792468637	2.67873164559821
AURKA	1212.57704133407	-0.732244168423784	8.36619376392195e-06	8.38168671533662e-05	3.91569161532777	3.80642791545983	2.69383682701518	1.88453588032718	2.2381762215085	3.2044078799356	2.27135444945103	2.16503685401277
AURKB	533.086485779706	-0.767301403419367	0.000509451901740802	0.00311638940345742	3.19245893080859	2.71407163466393	2.10713743077909	1.21746044472091	1.5381322542153	2.17459502413164	1.6505632368785	1.42027930767751
AVL9	4073.99450779293	-0.515339999438617	1.09434801733354e-06	1.31448107765863e-05	4.41492805847464	4.49088540145329	3.16099761792288	3.05241884411151	4.41522527768406	4.56870450467737	3.20357089097435	3.04241033681122
B2M	14165.7837576407	-0.388374243953964	0.00722319865336982	0.0291449170008433	54.6064635394374	52.4026637635832	48.1552142790551	33.4287864193669	54.8413574446	49.6349107837071	51.008558602	48.5305663639745
B3GLCT	1297.98696340128	-0.629177287677967	6.85457205557735e-07	8.6159932204167e-06	2.52234781253773	2.40177855712342	1.65327570111231	1.5050952726937	2.19442608145466	2.09382594590245	1.90796415072677	1.73574032212605
B3GNT9	1122.24516043248	-0.521171454023359	0.000152046928184192	0.00109793630736316	3.43054011987051	3.01892579286446	2.19173628990342	2.241223168775	4.02698392107756	3.40580758945434	2.69637297322098	2.77923324094144
B4GALT7	1020.06989251312	-0.467689266367653	0.00469796838113326	0.0206432821165781	5.25192323131231	3.81950185343788	3.36973391309516	3.07753922885731	4.93666625000794	4.70432467550268	3.23788543773293	3.55223206448947
B4GAT1	887.512958428197	-1.77139839479527	3.83926764371504e-26	4.47638748976258e-24	4.748021847637	4.06929911982269	1.40129092637756	1.03376182845929	4.63068747137539	4.33989620647044	1.29195777485008	1.45144118110964
BAALC	646.154967360458	-2.03087785419067	1.79343667943895e-35	3.73172785990951e-33	2.35004887482557	2.49357432006161	0.533005872752426	0.559873084353755	1.27357610937935	1.28006192164838	0.802694058098378	0.671304142403489
BACE1	3707.66985798205	-1.27837458559328	3.63390738606453e-27	4.46805430877479e-25	5.51777678343289	5.97171501160055	2.2898692351951	2.34846882539533	5.69570871206698	5.41252433582268	2.65915740874684	2.48222634060377
BAG2	2114.7420408962	-0.699058133016814	4.67854112870605e-07	6.10592484228523e-06	8.27130014894926	8.51537277175937	5.79613323284697	4.46337103508213	9.36523641783196	9.39797051254808	7.02370036813248	6.1695224251916
BASP1	3261.66124897188	-0.950549908693831	2.8632473381102e-13	9.75451391635779e-12	14.8069976904121	14.1032021928801	6.77691438054011	7.84201158868777	17.7825198260847	17.3331486189032	10.4810396083057	10.4037415689732
BAZ1A	2490.85628825366	-0.803100602395536	5.20674528581621e-11	1.30409685167897e-09	3.30225233593593	3.62159439029762	1.97700555083145	1.94653548684405	3.06965170601536	2.83422087208559	1.9006610468104	1.710552859707
BBIP1	827.330798148075	-0.771079731523559	1.74262055639287e-07	2.49143160943061e-06	2.75816745191443	2.8315737252589	1.74097996086644	1.48998007079432	2.59455780928802	2.67001312451161	1.90557505365482	1.6114084951231
BBS1	635.996891851046	-0.66246472298971	5.63132057648877e-05	0.000461597641194004	1.47154420058458	1.58741330487226	0.901206962297721	0.982559467425092	1.57484829660717	1.62608055531682	0.883755577981144	0.944559040507353
BCAR3	3582.38183491253	-0.334949200232032	0.0119029391893219	0.0435925406270183	6.45929439354158	5.85802878175929	5.52792242578626	4.23967249138869	3.34546430174874	4.13054669712826	5.12151185582199	4.76227273916353
BCAT1	42670.9665951343	-0.740524275558557	3.68472624568694e-14	1.40779442013886e-12	33.5178288472193	35.0053669899532	20.8685036564427	19.9729994680403	35.2480885077809	37.3761902077361	27.0733418393778	24.0905684840183
BCKDHA	716.255893511681	-0.609320214922336	6.31125167988418e-05	0.000509610023704081	3.45351684964986	2.99323853394262	2.10666838915693	2.04055820754705	3.58478168652761	4.20836308687294	2.43688285646151	2.15992604730511
BCKDK	1623.26018583163	-0.404334370065867	0.0127025531410433	0.0459026146933997	5.88082033702871	5.08754035462395	4.84742519839865	3.40011350274976	5.37827800938704	5.05497285994098	4.55650307898731	4.80319714576113
BDKRB1	3693.93999378311	-0.64753084433604	1.26400155847659e-07	1.86837388834928e-06	24.1130454325797	21.5025535829844	15.9075366844919	13.0304585662917	14.6642645162951	15.8722789661617	16.4040258288566	16.1452048395558
BECN1	3064.95771142844	-0.3722399342707	0.00258479972260174	0.0125427873616165	10.1714677903487	10.7786923954045	7.75445049658771	8.35244637791524	9.28594166515193	9.58209373604822	8.20413782908246	7.40571108566334
BEND6	881.781651611643	-1.06623764476608	2.02524028318924e-10	4.77201652092935e-09	1.37143765629409	1.51868957974307	0.768845819276426	0.572771330410004	1.58864432773682	1.84157743649731	1.13741411857086	1.01495610807127
BET1	1382.52209589072	-0.581921345334712	4.40615694826142e-05	0.000372690886336684	2.2309911951951	2.39139626831062	1.70132380697833	1.37081776716874	2.65213903979923	2.63277556837997	1.76159709543626	1.49932439763735
BEX3	7381.77294236684	-0.390799739202974	0.000111337019282466	0.000834256612629004	41.7177919730292	39.4363989502821	32.7187412754842	29.2053337252698	45.430508650872	44.5754660115371	36.7647169067509	35.0098476096229
BFSP1	99.5295294450875	-0.814695597047922	0.00402435854428957	0.0182343213773925	0.308395181929204	0.27183073543038	0.135987283491292	0.150883064026502	0.192833989270024	0.212575240935142	0.13887257986144	0.129760872630948
BICC1	4262.53282752713	-0.376328647241212	0.00310315026174693	0.0146135471065902	5.5772176092035	5.97897112716134	4.17670446041379	4.67422935837614	6.38886956982295	5.89807173757856	3.34121875104832	3.1970128504009
BICD2	3088.92795327456	-0.730401108489097	1.28323629444108e-10	3.08821545948675e-09	4.21144495174501	3.69807015026361	2.42773332575275	2.29503816960224	3.18937680376603	3.19468287826106	2.10781091359519	2.21556173238389
BID	1812.61462197046	-0.611208977789389	5.36454541145077e-07	6.89067936609844e-06	5.70550908233643	5.13319510557764	3.71241194088115	3.332799278325	5.66276872842199	5.57378078587912	4.25008187348581	3.99556166680842
BIN1	1132.22829656692	-0.427019883208854	0.00485936890544795	0.0212420699567497	2.47027568447976	1.91477684411943	1.6441847989195	1.57451069404908	3.52396569713128	2.79080529324007	1.8440192772384	1.88040429773456
BIRC3	1577.62975798454	-0.853465585507561	1.12466297097606e-07	1.67892568238975e-06	1.91158632818596	1.97096188429056	1.24204998410869	0.867590935858804	0.997427461686645	1.12584027513715	1.23346822358309	0.990133100465982
BIRC5	1542.10419178577	-0.969784310002946	1.98407569223879e-06	2.27991705501526e-05	5.25142463777733	4.84704404687416	3.17582015697001	1.73980019937213	1.94272102310002	3.20703417510378	2.58318148278264	2.07848082205305
BIVM	761.959201461771	-0.806895620120331	2.52617339649984e-08	4.24775289498152e-07	1.66943362692527	1.62657296099098	0.938558444994391	0.907624740796125	1.39197252381206	1.38840922217185	1.02083483534903	0.941993794288448
BLM	321.510896183902	-0.646298076921679	0.0110449878686661	0.041084560210041	0.56799234150161	0.521585354116935	0.438557816389036	0.223040835875864	0.294662789383245	0.36756654132093	0.344415810104715	0.286301209143712
BLVRA	1524.96689127149	-0.615410233079291	2.38458785881024e-06	2.67425794281994e-05	10.5215630830889	10.1330083915757	7.31310677151596	6.09464336127938	9.02042937858153	9.54684925334092	8.59982821552168	8.39757150274885
BMP2K	2416.32180142481	-1.02505946987911	1.25924746239514e-16	6.19320797414335e-15	4.7931425410739	5.00135834037418	2.58070452724719	2.17256229401279	4.41806535667961	4.53119113815285	2.83666717836467	2.95863728349833
BMPR2	10142.5124374313	-0.706506600593296	1.28547345080292e-08	2.26086195346026e-07	6.79864954997549	6.91598339807189	3.84588637100091	4.44753970115122	6.76607210441284	6.33240059007849	4.19976286688576	4.01509381806942
BNC2	5889.87112265296	-0.48269578606886	8.88109795916825e-06	8.85164700794035e-05	3.35650449870632	3.52406054123001	2.44008090686504	2.46759843348083	3.35632336837613	3.5730514082187	2.92473954017189	2.98268668832841
BNIP3	8920.37021182152	-0.502881800507905	0.00267489402913627	0.0128838823874886	41.4704251832718	43.0030579887601	36.3275191104177	22.7513273699704	40.3169700045062	45.0157619416565	37.7879038996445	31.7841033228847
BOD1	2123.57315737966	-0.45187470895958	0.000137078017264642	0.000999450233695032	8.44060648478977	8.21294804536526	6.50710167366439	5.65435296648122	12.0407776344546	9.95656408686072	7.17725008979239	7.25084164651184
BORA	376.34300360735	-0.586447707129698	0.00234280099227443	0.0115517256363513	0.973089291665122	0.901843195229484	0.692882713871624	0.531502034508658	0.773892564501336	0.931034844085615	0.600374203291854	0.645386390968787
BRIP1	1454.8314727023	-0.795239147311953	5.54921158580179e-08	8.73726271221994e-07	1.4516231603908	1.5266922158556	0.957628467580363	0.738331473748259	0.786345176230233	0.997240070181215	0.957374820195407	0.884156834932472
BRSK1	299.777790613585	-0.837228661560389	6.78879647904785e-05	0.000543304570290664	0.948905023192852	0.725783452970063	0.430892693279191	0.447965499692782	0.708111944551368	0.802542666866374	0.438939137345886	0.45106749298197
BTBD1	4638.81726778775	-1.5340598625886	2.32031459631925e-36	5.06165401858352e-34	13.1079775294334	14.5058004972398	5.02188775655499	4.29719827625528	12.8392972906817	13.0289827196051	6.72005910503977	5.66234640707052
BTBD2	2287.67547003521	-0.486094611736213	0.00393866415181088	0.0179060277826024	8.07621994972161	5.42719116719292	5.12654398076003	4.34699986021288	9.12836035803925	8.30699870095898	6.1001297317318	6.85794637885249
BTF3	11455.8953397608	-0.336310066386701	0.0019949823361742	0.0101132444140765	64.0066836491033	70.1244210315295	55.3006823387272	51.06883619485	64.2767468879104	65.3909490491045	56.7720830283294	56.6460752235153
BTN2A1	2025.66914808033	-0.555757894952699	3.75287800402202e-05	0.000321454559875857	4.27167783833806	4.34323679708444	2.70372922580169	3.07680367569194	3.91022757651747	3.72705265207748	3.00111091166219	2.72001460223282
BTN3A1	1855.14953663631	-0.458285818713647	9.46500980421434e-05	0.000723244393231632	3.40697382145082	3.32096162464138	2.55368175880472	2.33124162381093	4.5632610674295	4.12990639377406	2.8878465774508	2.89913840841599
BTN3A2	1721.83258240783	-1.92280992347561	2.69942565888694e-47	1.30391900130164e-44	4.5870088944381	4.15309454953918	1.22049467110027	0.999109562996459	5.08693629867274	4.70622593046976	1.58037302309018	1.55646906906524
BTN3A3	1240.66369074651	-1.06704647145972	1.83396619880821e-16	8.89046338311147e-15	3.66283816119835	3.71782320249872	1.74469600970147	1.70492132613338	5.03310586792125	4.0229061643825	2.33090698910806	2.19344286530894
BUB1	1218.38259167969	-0.910069504488496	4.27281209314888e-07	5.63253251070551e-06	2.96927355129654	2.83371531704781	1.82810642363093	1.17122853959595	1.67453939058499	2.37095843667955	1.62148840891682	1.42330118874243
BUB1B	941.310491439185	-0.857128259972805	4.24504938228348e-08	6.80264133831565e-07	2.1812042947065	2.09945727518885	1.31948366685514	1.00297319289706	1.1350449779751	1.5460691201295	1.02329948385768	1.02220497151659
BZW2	1902.72725998901	-0.908156744780826	1.84498008678754e-13	6.46459991549262e-12	8.44913460922336	8.99108493132144	4.8208036527629	4.36635448068987	8.09998708632979	8.76699450920789	5.2327252799686	5.22569827105166
C11orf45	231.03948755211	-0.836743347234614	0.000137451447282384	0.00100163298733526	0.523803853928804	0.499795694946975	0.303335689149001	0.241072664449563	0.482155783690902	0.557948779740121	0.544228898166074	0.429549762231384
C11orf54	978.712949839068	-0.811261961875766	3.47642973479966e-09	6.60375170830975e-08	2.96853262516529	3.06100286926718	1.72787324742076	1.65325661762632	3.27793730564487	3.337544878369	1.99555256751151	2.01010349576657
C11orf84	590.427887433154	-0.521488367952522	0.00162989281767764	0.00848183930707583	2.47738304381819	2.03908548162853	1.61068641048013	1.47919892409919	2.34980043329184	2.20636211890264	1.6664003388614	1.78271573738661
C12orf75	8209.11793967735	-0.838571097469729	1.36947694696238e-12	4.3479285698747e-11	49.4740199524894	51.9010353039061	31.0067863739359	25.2440377847628	35.1484017751683	38.1105190179122	34.0501185031335	33.4862845775115
C14orf159	1296.36283615583	-0.611165288234235	5.73466551449101e-05	0.000468931989622073	2.49913429900194	2.27757761180033	1.77065674649656	1.32786238656637	2.89850356896661	2.60749976137734	2.23499948719834	1.97585236237147
C15orf41	689.28222189923	-1.09019763040722	1.73461871344064e-12	5.35632833317001e-11	1.83005311796435	1.84500386300371	0.905260295009054	0.774838851679136	1.68942229383447	1.79622200766563	1.12556927354363	1.10590866380936
C18orf54	727.774528630226	-0.48057351520424	0.00215945697779903	0.0107853233473899	0.953464525797925	1.00456253305273	0.763474761676493	0.632669941085936	0.497375526387123	0.627177519892764	0.60988930556187	0.447541671194214
C19orf12	1621.74287959967	-0.43881567291123	0.000628088626688031	0.00375050714170226	2.43818658263344	2.29424744663168	1.89372025636963	1.5913471638966	2.61616432849786	2.79900868863634	1.98701755802904	1.71161127882628
C1QTNF1	2279.5189758897	-1.3773768738898	2.19234263096152e-18	1.26715530272456e-16	6.66027008672746	5.34295033432654	2.56661746680094	1.87071219360256	5.23838773632618	4.15741430966466	3.79045188020162	3.75772095404745
C1R	16330.2320324042	-1.34854894413878	6.5696365819822e-44	2.1671788968612e-41	64.6098419885326	58.9281736609283	24.4688774803136	23.4055402101148	89.9329370786905	71.8268554312607	41.1784652373595	38.8908607371249
C20orf194	3185.14227513225	-0.870225047796972	4.88443743220276e-16	2.27017238043101e-14	3.93837230589507	3.89723747850942	2.20053891263987	2.05154188740083	3.81506068980923	3.81376522495599	2.44015891901215	2.32375072038452
C3	355.364054648557	-1.17396026175035	3.53517445153337e-08	5.76757954849082e-07	0.600784411219749	0.68122140324829	0.315385212663475	0.21821595436818	1.11555139139514	0.563658480857813	0.455973990587922	0.425540819637344
C3orf58	1044.68494980111	-1.58018759526395	7.49082996100729e-22	6.14021061955294e-20	2.13334879065929	2.38402445100648	0.827537739354934	0.614832224833165	1.56650221512027	1.61504504024513	0.947838135804134	0.756444015827047
C3orf70	48.304407851119	-0.99339279064286	0.00299740261134014	0.0141672503663647	0.079472901101096	0.0771298592376237	0.0308185607731494	0.0271845205917126	0.0445756631220902	0.0663312691725094	0.0463503361245726	0.0358870944134395
C4orf46	602.134401508821	-0.671167996439159	0.000130155058652706	0.00095619074865717	1.30137203863643	1.31430961367437	0.9278091140013	0.689805527311262	1.21413733117698	1.33205904150793	0.901374804556468	0.756776251549049
C5orf30	304.615948720632	-1.00178722080821	5.35254845273467e-07	6.88803214302915e-06	0.710955097626328	0.77848803072369	0.375227635053001	0.331398150541928	0.989676021189467	0.969129951714663	0.480728004725307	0.362295212195733
C6orf89	5736.29089481853	-1.08694473998779	3.59467238221984e-24	3.60132918292766e-22	7.042131810354	7.12842880232638	3.52842698498891	3.0773058413835	6.80991514942659	6.78658464673192	3.30708858562204	3.22251151778265
C7	387.304756928155	-1.42323893362513	2.24655568338016e-14	8.75638778608549e-13	0.899866379172468	0.97284444019064	0.348860119293007	0.306140007806398	1.26628805922528	1.32714047916398	0.569724806059362	0.567146175744232
C8orf59	974.823458434538	-0.679431580734361	2.22914202785356e-06	2.5322722042777e-05	6.48994210966775	6.78474483519827	4.43953151504571	3.77194727232195	7.47644924112635	7.50109584191072	4.75009150566061	4.5712901701131
C8orf88	554.920914391255	-0.586235162400216	0.00114286284370307	0.00631164555372968	4.04619051287631	4.29729142906802	3.14326491322588	2.34548797694895	3.7690639318142	4.11611544256104	2.79227762090632	2.64586485874556
CA12	1736.85755878064	-1.65547641558241	3.72428480697626e-07	4.97245330842586e-06	3.12229675125069	2.74054250217835	0.796078462113323	0.394198516720945	3.23700410702763	3.03461333574874	1.76395769330637	1.61222615531027
CA9	42.4977822343482	-1.32547616729952	0.000134211099470023	0.000981722617810739	0.333886725385053	0.246193193469407	0.0819190662713309	0.0564830847276558	0.214073027624887	0.20887572368957	0.215118451893474	0.20441094993601
CABLES1	1623.94364199567	-0.629120540333706	3.58483425376595e-07	4.79099637175736e-06	2.57259182749762	2.38548664755368	1.57392477767152	1.59480116105535	2.91004595595245	2.75838354380881	1.70510856744072	1.69612813914342
CABLES2	286.936076628638	-0.74444304459427	0.000311415563850896	0.00205759428484776	0.664326352782186	0.599503359869274	0.406002579705124	0.320663783358791	0.62750472718642	0.539769019871851	0.395436127211267	0.417874577674669
CACUL1	3932.15302286904	-0.347752998742802	0.00149658443653538	0.00790984935683512	4.17776431996949	4.38838548646562	3.42134858740572	3.30872859048815	4.10241094174492	3.97029947434935	3.39749912249384	3.41101674295483
CACYBP	2438.27485368066	-0.395860726984339	0.00130641019140825	0.0070227336402212	5.45106977567469	5.51381328843393	4.55336565645714	3.78636019739039	4.41785636094383	4.94189843702353	4.51271789512822	3.99064591368099
CADM1	6901.67718347322	-0.545496948538952	1.93482250160512e-06	2.2309014777672e-05	11.7538742130071	12.7106736976359	8.98747611165664	7.74243703494244	14.7563958949867	11.3045645573812	10.4989945938688	9.70229781882495
CALCRL	189.30900721226	-0.615952850088586	0.0108780089191945	0.0406086311432808	0.217231881982384	0.279712266763861	0.161029859109152	0.147524659514458	0.314236378940429	0.404829838362629	0.299953696333054	0.166654703192143
CALM1	13542.9316186744	-0.357028028074677	0.0015806915349901	0.00827354992675741	22.5022502351516	24.3454796855114	19.7670552929514	16.8652558222681	23.9057112055334	25.8096916139428	20.0882776051478	19.0261879495127
CAMK1	1033.6227456711	-0.489025303854271	0.00206162374474871	0.0103965179521723	5.60430830978212	5.05331615155099	4.32101112365112	3.22349126413305	4.36604068692376	4.71583639390902	3.81407295892643	3.98310217476685
CAMK1G	190.952654114056	-0.71837847699859	0.00159025587259975	0.00831211733672333	0.638273711127708	0.648945735755301	0.379182463433249	0.360264774787554	0.410316378172571	0.324670177036695	0.319898635638717	0.399211688713592
CAMK2N1	4396.58765740004	-0.88870698680024	7.73879850983779e-09	1.40581936157472e-07	16.7857473602666	15.3361398745425	10.1140951813049	6.89024872093447	18.9578794048688	19.7799671259139	17.1761823266567	16.0110897574506
CAMK4	480.95790069649	-1.01227452302714	1.14035860556082e-07	1.69860684363548e-06	0.348654316971013	0.357933454130195	0.145033723019554	0.183399524199777	0.286230768912358	0.299835272118411	0.185520430908213	0.161595653846992
CAMSAP2	5528.65954777553	-0.370374551868	0.0019319207313565	0.00983040928953977	5.36449909884672	5.70879973030222	4.09481123670867	4.43724177008786	5.19396836242369	5.13782791435889	3.39670389090061	3.22559745797864
CAND1.11	71.8777994179052	-1.17537678697929	0.000250279762061001	0.00170102200094223	0.597313698311896	0.796214330921616	0.187392878781622	0.261384548836804	0.842739412262986	1.18047399992243	0.193854178122579	0.448114338359475
CAPN1	5486.57285362383	-1.09164972739372	1.06614672386537e-21	8.58311573826142e-20	15.7117251998797	13.2838237956342	6.78563334199542	6.59159026429829	15.049393489545	15.0664288628674	8.46537767955488	8.55229960946214
CAPN5	1046.0542616316	-0.858813172913051	1.10931998068737e-09	2.30469320104403e-08	2.09789623910219	1.96385821618669	1.05222148266693	1.13139820224005	2.00197348561439	1.94416474544118	1.36375921776278	1.44566617756424
CAPZA2	6924.34445780845	-0.605155746872672	5.0902228216649e-07	6.58176516854855e-06	22.0144486299223	24.554063232929	16.4685487230706	14.0300282178279	23.8301264671131	25.7230046944856	18.8811140288779	15.704645578464
CARM1	2607.4147901142	-0.518135131393966	1.0395559671046e-05	0.000102031890094991	7.20452077535547	6.40959253954135	4.68131030732746	4.74810701311128	6.81114339089569	7.44319716045515	5.40381333256119	5.34017580441614
CARNMT1	1330.70736877563	-0.944770599530599	9.71206018743773e-12	2.68072681704276e-10	2.50396171658238	2.63498681438247	1.44160045547892	1.18952364208771	2.62189990348682	2.85703972311071	1.66128611215408	1.46767608242298
CASC4	7903.41879974564	-0.541118269318697	6.89802061704216e-08	1.06501973567917e-06	15.281355103411	15.5629163733354	11.0028920625344	10.1647470514644	14.7915660802114	14.3717813477521	12.1046713662905	10.8708025807657
CASD1	977.290647049225	-0.546865896785263	5.92115079809997e-05	0.000481271421540277	1.96526175478294	1.96919100119293	1.39712238933905	1.2765415149554	2.5688609302844	2.45624015334732	1.37888764833188	1.27613244885934
CASP1	1504.21168982236	-0.508396320973634	3.42189465053746e-05	0.000296864176706345	5.77207108408417	5.79105372843212	4.19991338421581	3.89385960668039	9.34393380688609	7.62986856121517	5.07263282471458	4.74490317962762
CASP3	2598.22781851938	-1.25206910116363	2.07776344551285e-21	1.59669037503189e-19	9.53012681370036	8.55073294559453	4.15019826205149	3.27922353521146	7.35734459747959	9.04325563391665	4.482380667622	4.03802437198461
CAT	2366.63548546768	-0.513354253636883	5.74508342333935e-05	0.000469500019943593	7.61370609984025	8.27116115537336	6.01325125115438	5.09145977776253	8.8566102509429	8.99479231825642	6.7585541096845	5.92725099069886
CATSPER1	28.7448789640785	-0.994085409255117	0.00555719228670699	0.023576231392005	0.118106287695682	0.105782263244468	0.0277755367884467	0.0358259420372357	0.0915736881003872	0.0874854456205354	0.0464152277749952	0.050536880520644
CAV1	41722.4586414793	-1.83589190831663	8.10994267369514e-74	9.14058122181056e-71	113.678603807124	120.653493304172	33.538265903975	30.8339275729384	97.4485942730939	112.831857236109	51.3616367733348	43.0700032342738
CBLL1	884.228005620122	-0.58084760501256	5.29398955891801e-05	0.000438464230155335	1.55706718939471	1.53888789470199	1.10609832700389	0.947989750727717	1.45799960098487	1.57030306253621	0.978158425288197	0.881394606549834
CBR3	351.18921569605	-0.533901831751983	0.00448923100215706	0.0199529573789596	2.55733072436681	2.3846262947452	1.80715522904858	1.54057578564239	2.29590367296709	1.66554744167998	1.92672761887618	1.9103554369076
CBX3	6216.97321187106	-0.399068887748051	0.000366673146332578	0.00236368792365116	18.5527950771726	19.2510258372	15.5096536624527	13.1877383031406	19.1441308082128	20.385811817774	16.4588695708819	14.6115080287933
CC2D2A	1041.26731814304	-0.660154491868801	9.78888118560294e-05	0.000744208083391117	1.29763226145553	1.33715322176101	0.706116037010234	0.909005406701973	1.65756284397807	1.61669706675943	0.947773908800191	0.971051619902045
CCBE1	7925.23273210943	-1.29802865604562	2.09778258243839e-24	2.14943253238479e-22	12.3195770391333	11.4402250339509	5.36284606817678	4.09863527461314	13.0865486882902	14.7884660079308	8.60130011674524	8.24899817030408
CCDC115	659.345285732034	-1.09880003502651	1.48185443964218e-11	4.04074219680655e-10	2.50955235344347	2.27649829773488	1.20192944200994	0.964316758395621	3.04921902618425	2.87671231016701	1.3552957464083	1.36131615353126
CCDC14	6113.69976088499	-0.587074825113014	7.29555736208808e-09	1.32802709720379e-07	11.1068390164487	11.2741988476488	7.57645753063747	7.27676948577151	11.2282577956236	11.9795771583154	8.3970605281682	7.82299816997992
CCDC149	869.462583272237	-0.471944688613015	0.00092137839026019	0.00526251804403254	1.56659501451739	1.52057097000971	1.08601656386842	1.11325807590292	1.57887747949252	1.31955523074935	1.36728475297346	1.28611321301054
CCDC150	210.213702014012	-0.784088666470314	0.000379932609979553	0.00242959269502291	0.492811370249472	0.47256929200386	0.281303626756424	0.249693659801621	0.363206089380139	0.383428409632145	0.255658475429042	0.305298986624238
CCDC28B	319.398988745512	-0.557631359231451	0.00548614464925081	0.023318700936869	1.60608076108297	1.42226090847958	1.12502184345961	0.885291199248638	1.53336029089454	1.67428227145679	0.967381159423988	0.961867081087782
CCDC71L	2001.9620366933	-0.446610353343852	0.000196724010886452	0.00138217779077365	3.38541876844749	3.47109835977971	2.48906935064615	2.51633251906845	3.9994065774044	3.66422921161231	2.33217241092625	2.15706918965307
CCDC85B	495.558864989199	-0.615187010863269	0.0130702806036373	0.0468900650302903	4.35730932398265	2.21660697740853	2.28063478412368	1.74183475116841	4.47109395329019	2.30147258785897	2.25707702133892	3.47005008904156
CCDC85C	3188.37887834689	-0.424099723191259	0.00121875050562778	0.00663057143548501	4.68728539060288	3.79422754087358	3.38963790809961	2.89862196610868	4.63153170694725	4.77763325356754	4.13975685468812	4.11701891919259
CCDC88A	6515.85708186396	-0.539698165267799	1.87120543224428e-07	2.66962589357636e-06	5.06222700931151	5.25834236546887	3.60441387954911	3.47720627132425	3.85800384926323	4.38828278637676	3.5193819820619	3.3621629036611
CCL2	531.797975558908	-1.48817859539994	1.08134364052985e-17	5.89724707184122e-16	6.90584402057998	7.09077991942762	2.17891556592379	2.46351040527168	9.37286771460453	7.69371251741798	3.59029476109249	2.73748539731072
CCNA2	1661.77069534313	-0.850233786076544	1.21662245522257e-07	1.80425643715847e-06	5.0656319325137	4.79645739589984	3.17272029173682	2.19347017693645	2.84517467919996	3.79742084745591	2.73046768119753	2.50072654501924
CCNB1	2022.82227846091	-0.990719587602249	2.03457922606305e-08	3.48766591032989e-07	8.13625332075427	8.34047364117719	4.93465031601036	3.09794750271171	4.42697718753879	6.65680167134201	4.29840725575004	3.70438249357098
CCNB2	706.431268404496	-1.02866911506556	1.49075992355071e-08	2.5915845714683e-07	3.94871582628063	4.16898504013465	2.2717865266737	1.57686146633176	2.49725618125028	3.80271529329332	2.28565406709587	2.13188150263718
CCNF	971.658954582635	-0.409512274910337	0.0109732693368171	0.0408660537642029	1.90025370499337	1.50838004348959	1.40740393017766	1.1366052866906	1.21367465364161	1.45539380225757	1.21667741579026	1.25414337107156
CCNG2	1723.64648333832	-0.620017364740086	5.57922435498057e-05	0.0004581603485192	2.32408611106235	2.70647501063074	1.48172645043058	1.72844515718409	3.54884008402047	3.08171038192426	1.45317490837619	1.44348896200017
CCNY	4590.14276567012	-1.14064185663163	4.78560229481556e-22	4.07077176335726e-20	8.16618070005766	8.05654446790632	4.00114002328878	3.25872103361252	8.73091222392906	8.18753582347182	4.59826990963327	4.18598400761661
CCR1	74.6648444420043	-1.62628269083671	6.84742412677762e-07	8.6159932204167e-06	0.294569519148998	0.308122183337407	0.0883476925482291	0.0407181291171071	0.398967470714814	0.374596102989834	0.0851748048925956	0.0840827179155693
CCT8	7329.87478034564	-0.462412036549024	2.95025427898331e-05	0.000259273483581866	23.3008556618101	24.8265162133176	18.6455933660868	16.2762703573056	21.732378929065	23.7990786354343	18.6182042330402	17.5035926475525
CD109	11790.5384798448	-0.925963497804322	6.98690669825394e-19	4.2375745782011e-17	10.8251172681852	11.3526924645555	6.13055871666148	5.46118060483966	9.07705339627706	9.03680781502739	5.9897550721909	5.89406121687554
CD248	2543.75318849047	-1.41372777271368	1.18373979126249e-31	2.02659249073736e-29	10.2511277172725	8.85005157679629	3.50141560233619	3.47634343577945	14.8620638302223	13.1595740685223	4.84428206597351	5.07589227411958
CD274	1092.81394733164	-0.60565313295928	5.09936952350225e-05	0.000424947460291854	2.322008305967	2.24443490216883	1.678490003154	1.29966457894264	1.3121331248846	1.73716005346093	1.69812088008325	1.48783140969563
CD4	2406.43497211198	-0.446561168485922	0.00209942444549639	0.0105517337886803	5.32414439785951	5.26327355403739	3.43818163320491	4.22022463729408	6.06779894340813	5.61091603482399	4.30691554828878	4.02931177541605
CD46	10313.925680571	-1.2030694152811	5.21824185403702e-33	1.02285103008479e-30	27.3522217267514	28.3641971222943	12.3035773919648	11.6322882426779	32.0359033526857	30.1852634217039	15.2668394701999	13.7251666065143
CD47	15116.5223735196	-0.423721975927726	0.000807942552129006	0.00468988112340979	20.9696386118142	21.5742518836537	17.9632146907893	13.7334470465512	30.2803065219636	28.7976975419708	23.3029790129987	21.1383519852879
CD55	4550.63959444497	-0.399204380576691	0.000869448908598186	0.00501248784688425	9.84561128703622	9.75830584321727	8.22701479839223	6.64741574368487	12.1082359593971	11.3046818142735	9.36707520112676	8.55444339804178
CD68	2352.96592946138	-0.70251141898637	1.04302527197785e-06	1.25618137163851e-05	10.6608434493692	10.0401347817922	7.25089666328353	5.3424116002594	6.9695190808116	8.06544161058112	8.33033455480266	7.62687706596846
CD82	1266.70437713828	-1.17205696843568	2.94703403415562e-15	1.26938329018964e-13	7.22835219009298	6.53776746226314	2.70478251160687	3.15737667791339	6.99533291786276	6.47559792642344	2.96984547973584	3.07995987273114
CD83	143.079909289616	-0.80974191138322	0.0015052672471306	0.00794642447987561	0.459126084465957	0.515457001616335	0.27773195534354	0.235317729399777	0.761067795747446	0.602121789480843	0.391783830834803	0.364884897295037
CD9	5907.1333885405	-0.737338303842072	4.40092651197106e-12	1.26107057361035e-10	28.1583690898413	29.565467945048	18.0182449104261	16.4415442718187	26.2304178593024	27.236933613847	19.8215763988731	16.1702901724119
CDC14B	3242.32016073931	-0.406182189095812	0.000273309144495139	0.0018372297113801	4.20458729162278	4.235953253852	3.38989169744873	2.98244402265001	4.95874198325939	4.59139781259405	4.1778160228962	4.2082921903638
CDC20	1096.72271852998	-0.668572970266249	0.000796935655849725	0.0046350200504108	5.5195332848083	5.15802277685864	4.13911497213961	2.41016135866629	3.09644848576699	4.6080371545397	3.34947630594839	3.20216346976371
CDC25B	1877.45359789641	-1.03776483270262	3.1472829051431e-17	1.64351356340002e-15	4.06522681137253	3.56008870100527	1.89394481210051	1.75478764743725	5.3034599336902	5.36450329982878	2.1059017244825	2.15544422280746
CDC25C	164.770807457526	-0.888444609926406	0.000348339329759322	0.00226395455790237	0.551317838351309	0.569795367158351	0.321970618057087	0.239075095590444	0.376288893458821	0.397475824944544	0.298582432777577	0.283252332863664
CDC27	6648.75856521089	-0.603821636427248	2.16256002821919e-08	3.68370584151946e-07	8.68131733925778	9.25119520645636	5.91487471708629	5.83226340876106	6.68361884216177	7.58576933517891	5.78845710846271	5.42747891119378
CDC42	17424.7098268401	-0.363510146571342	0.00153929361464314	0.00809445806300486	39.2892686993693	42.1994641783542	34.6053399010794	28.8204595658486	30.433501473886	34.6863812966868	31.8761753403503	29.4224861426655
CDC42EP3	13013.8325820099	-0.337824246743939	0.00453699817176281	0.020066350645223	15.5676939230623	16.7445743780406	12.1394389264278	13.3487438868828	12.7131493053719	12.8942355293513	12.7618429726565	12.4389590934759
CDC42EP4	1659.74942311958	-0.383705059051477	0.0104774127627232	0.0393958875773786	4.24092378454441	3.73101405848312	3.48941936916482	2.60506300277584	5.38137044308298	5.06743433440798	4.20427890856366	4.18921323498938
CDC42SE2	1963.85058145117	-1.12194580674958	8.42161526209123e-20	5.476074347105e-18	4.70246870508409	4.99051139295788	2.31056132243801	2.07382911166601	3.93808146820141	4.20938758106826	2.12799092416127	2.06715884676468
CDC45	290.986285227205	-0.87718260565678	0.000349858730695981	0.00227273743163455	1.20815107038611	1.23461482100542	0.798325603865618	0.446779819053409	0.466503838007318	0.865802054813359	0.685359293550628	0.67359225778178
CDCA2	990.793384986693	-0.941324856084224	8.12707219396057e-08	1.24061683322028e-06	2.10266958416381	2.32461294387016	1.32567589586111	0.919045938077935	1.16365215467526	1.61237854432709	1.12325804300248	1.07522337041707
CDCA3	382.995367998251	-0.811441099292417	0.000395256038140079	0.00251332295056162	1.76763104292737	1.52043085204144	1.12118218784542	0.659570848753354	0.891624770879999	1.53268490780863	1.01326725619083	0.929223682267617
CDCA7	357.489522595907	-0.833263288787033	0.00181213268296709	0.00930136415071346	1.06527505731256	1.14085122228868	0.786335578126907	0.35221906208168	0.630483423394505	1.00224929883828	0.721906485140218	0.64529481642166
CDK1	1129.08866272075	-0.935175659136192	2.53296347577975e-06	2.82193830394737e-05	2.93508213902265	3.01385172590266	1.88821225719262	1.10103800997485	1.60652449020937	2.41404657129386	1.70590912728528	1.24058903001776
CDK14	2147.28811203739	-0.714163214380795	4.64838959680067e-09	8.67308015951638e-08	3.1307692676476	3.26266304986454	2.07224620695482	1.80112950937265	2.22997373671479	2.83185482865737	2.32706573600452	2.29602223727464
CDK15	2794.31501940941	-0.454439711735704	8.08320458998472e-05	0.00063230388709973	4.31292923078582	4.53709445285497	3.389232448459	3.06337106690526	2.62514343922723	2.60749192386092	3.23480712134045	3.11336678803796
CDK16	3496.5831066448	-0.657168752766124	8.133524632308e-10	1.72965284043971e-08	7.1622697319333	6.95234300384748	4.67777818571058	4.23572817213343	6.65847873425352	6.93183229742956	5.22847132984834	5.20053429527446
CDK17	4282.82064594611	-0.600925488170761	5.02098916931478e-06	5.23828911156483e-05	7.02890166537971	7.37025438253173	5.33271742166548	4.1171791107334	6.61041461671765	7.71566917164769	5.37457536950195	5.12799109893047
CDK19	1439.87862018872	-0.512435142198694	0.000493525957206088	0.00303630498043145	1.60781968805789	1.84753119413807	1.14367808077101	1.24814411119171	1.80814283061672	1.75301946587402	1.35738627032805	1.17310027113459
CDK2	1866.79404437106	-0.657532386185213	8.25289268870275e-06	8.28044314649145e-05	6.54364069646804	6.53607897349971	4.73421712065582	3.48710104947813	4.71048935635298	5.24018713905675	4.61930988369879	4.19328942507258
CDK2AP1	6270.27992043194	-0.54744316819494	2.62523197961695e-07	3.61939475273387e-06	22.4552998831267	22.8666950298845	16.5074517708	14.4625279923731	22.2011703764096	22.8398183899501	18.2257647999452	16.1792428300204
CDK6	18810.7588033631	-0.741922772858867	1.03564730725944e-13	3.7352346215157e-12	12.8785221370017	13.3994993107718	8.17845774794843	7.47388956762536	9.65056307240775	10.6133821490126	8.50837354871944	8.18307674789744
CDKN2A	530.321343640161	-0.473535428492938	0.00478609254316006	0.0209895919734889	2.08396782706924	1.83159450789794	1.50091655926294	1.28467852799604	2.93376406343432	2.87599982319125	1.79885253004736	1.939481685777
CDKN2B	348.017542674193	-0.68622632199252	0.00116025612495414	0.00637386843623265	0.738838486244352	0.703669395802476	0.362898996140241	0.481660854320184	1.12047196229147	1.02801162893656	0.440523064702036	0.398662921938454
CDKN2C	499.618681280726	-0.773254994073125	2.43949796650456e-05	0.000220402204388605	1.85226599284668	1.52528985819547	1.07516295090496	0.844011120533008	1.01779616050902	1.41777260905144	0.981125759021085	0.937388773594268
CDKN3	413.792968596571	-0.860150439556079	0.000179458226458463	0.00127210299415656	3.33534205463832	3.33201430268906	2.22443537376549	1.26042442755345	2.04428515482006	3.3249064159628	1.87988985812435	1.82901039517907
CDON	88.3857220579445	-0.919631028562626	0.00183376078631425	0.00939455099806826	0.10941951662695	0.0877770093267396	0.04929678655362	0.0395307678688261	0.269767052835421	0.264667457121945	0.111398905738532	0.103556083296039
CDS2	5035.60309969427	-0.858190885289903	8.17776765917686e-14	2.98124818302876e-12	4.49511109671525	4.66472938624363	2.41687166474952	2.57252856707935	2.77660922742376	2.76380415475353	2.13430172798699	2.10466484553135
CEBPD	1150.60643212761	-0.964851580394532	2.40843754690849e-12	7.2386928493194e-11	8.62214273073066	7.46629261107617	4.01226620989367	4.02352183984813	19.4865790532507	13.3930619021689	5.50840646279178	6.75534480562409
CEBPZOS	1240.3652137651	-0.873477407543344	1.08021204132464e-08	1.91730549329603e-07	2.45924306496898	2.89336814152553	1.36854488592075	1.477434008341	2.54171364747901	2.74351375007625	1.53486719119586	1.49401950170087
CELF2	1538.50087931046	-1.74624663865835	1.31578192615401e-18	7.80524146983905e-17	1.41897659427436	1.34755282406302	0.48283607645616	0.271293248214668	1.09210854761201	1.28273560898059	0.915500302402283	0.829750011074065
CEMIP	53567.5390136449	-1.43532596163074	4.91653897606069e-48	2.46282183893411e-45	74.4890641414303	67.1076883556634	27.1802527140507	24.4459939333638	202.163003288116	146.921165025593	54.4495877605316	52.5965736057568
CEND1	75.4613847576027	-2.99749621346061	2.43208351337672e-19	1.52995021015907e-17	0.697131702654019	0.460857937789811	0.0220972450938462	0.0239047906663616	0.150405825506943	0.121800628384058	0.0230789568542513	0.0361848362925911
CENPA	290.656355839176	-1.07646467158518	1.28304770425757e-06	1.52221229825295e-05	1.87830828801491	1.81870832900599	0.986296385723057	0.656600015364034	0.952850901549581	1.35620041877411	0.914475805867151	0.754865034416423
CENPBD1P1	1456.78811671126	-0.370139335971495	0.00521867964231912	0.0224428114983676	3.35987306687553	3.09774404390663	2.7216451230523	2.27026218093843	3.43638595626394	3.20609543916448	2.6720057769509	2.5869059211185
CENPE	1870.20820064014	-0.846635652042314	2.13069053439124e-11	5.63944999562456e-10	1.81377453228928	1.85752461455048	1.09665049262987	0.925756481325506	1.06775369509824	1.51486278924168	0.97538449351596	0.909516022396651
CENPF	5017.32079557222	-1.08341976599513	5.05975838582238e-19	3.09652634245465e-17	4.33294283712023	4.38726917168567	2.25559088709447	1.80556322958144	2.57582758338498	3.68113748404851	2.10306321870587	2.02339244164272
CENPI	870.943765158233	-0.681796415940992	6.05434425136617e-05	0.000490623163569368	1.78288471182572	1.81146564374618	1.29010054392635	0.919537303160618	1.07800464659463	1.43687350437339	1.27462149904399	1.13208127812594
CENPJ	923.028568232724	-0.603641205180856	8.20803467182128e-05	0.000640217237234041	1.44178626449574	1.37170342403771	0.841173531414561	0.967831224062257	0.972977211272895	1.21525259990922	0.845145047996209	0.876555527789676
CENPK	511.124839981917	-0.753651182257149	0.000139980996091893	0.00101842010335818	2.57089662685835	2.35118692977898	1.70198573043451	1.13479928225141	1.24248810084617	1.93584291618871	1.41769058847112	1.21574918101023
CENPN	913.468198339949	-0.512930330655464	0.00153079332494495	0.00806543814564879	1.26723638090984	1.3945780713012	1.04860109476994	0.806439413947895	0.829483380548916	1.19088264663872	0.98208941419706	0.83423991205866
CENPU	725.393471399877	-0.611198389656725	0.00782252278564111	0.0310992418212216	2.32821781970424	2.2556689800681	1.92201404546959	0.978044138761655	1.15592406528023	1.80828556445634	1.62379920197986	1.3832509022459
CENPW	235.408610171682	-0.714793817568735	0.00267077635976121	0.0128686320861312	0.484178793349484	0.493318566924781	0.345707475270109	0.223331842918867	0.315420070753046	0.503848222224846	0.347763743157772	0.296294899011486
CEP104	1556.73482046316	-0.416295490133681	0.000782864353855772	0.00456783450642766	1.87571767007982	1.74865761039314	1.34466253020942	1.35306969359568	1.71190120767336	1.85822073574629	1.26940266514969	1.32397079891583
CEP128	448.667111391402	-0.558224267888996	0.00103057371464559	0.00579082238910745	0.796992413681247	0.787350415273053	0.53860361633724	0.516789220369488	0.404443441403772	0.584763259179285	0.502869601961804	0.438019369246715
CEP152	841.493542913838	-0.819309247784234	9.56405071786861e-09	1.71329517826719e-07	1.25854395940828	1.25442821347367	0.740410592062806	0.661506470410829	1.00188837043547	1.20584649075372	0.704903481981092	0.662132648635193
CEP55	1247.38098926308	-0.888300702451495	9.143612357546e-06	9.07317367100584e-05	3.95293996154234	4.15679777990447	2.67864251574123	1.53840894325285	1.83661823884234	3.38701235737415	2.06089701355097	1.90218308547489
CEP70	844.187339498843	-0.437751120471458	0.00771984125957275	0.0307815014845877	1.63742791715463	1.80707797473698	1.43328516922342	1.10203442446352	1.80831543764604	1.92225358785218	1.68972099850194	1.45395219066158
CEP85	514.783821985228	-0.461829634444952	0.0094273000116038	0.0361509023694192	0.971317168776735	0.959930575940322	0.789044929623785	0.602664344675766	0.658020864978275	0.809651669715491	0.595779753750696	0.626316306319729
CEPT1	1273.8230615596	-0.722312668636518	2.75415478575399e-08	4.59875845399045e-07	3.44152802652553	3.59615113834613	2.17668294431679	2.04400157502912	4.19429920310771	4.17473482184193	2.74343279526814	2.46103788540415
CERCAM	6205.91194903877	-0.682298479569265	2.93121760647027e-08	4.87189690997624e-07	19.9312786183166	15.9691985066351	11.5346596369271	10.5934999253007	20.7270964612852	17.5059568395486	16.5832069171849	16.5727924762757
CERK	3078.5350586909	-0.623079970202371	1.48784736370771e-08	2.58985014081684e-07	5.45034182829042	5.58123913499141	3.62084115867905	3.50404310561449	5.2406300213014	5.49829788268903	3.07834966617583	3.05356963736103
CETN2	1291.07497645822	-0.451840434078956	0.00113520077079667	0.00627445460769306	8.56451555105487	9.58292856545559	6.57559793900736	6.5999186042548	8.97577227855577	8.90155296121695	6.80265929697934	6.7403564394409
CGGBP1	6182.28624486441	-0.379905049551194	0.000487225830379918	0.00300352295163555	9.27603852396733	9.80242314417856	7.77373400802987	6.90398312010497	7.44662247696706	7.89145261969542	7.17690990894084	6.08882096346133
CHAF1A	711.249635047111	-0.433679062703163	0.0106057535097185	0.0397924377207048	1.62669806214112	1.59036836342061	1.36272844583158	1.00860295857314	1.03446465549879	1.41646342496473	1.13179811935894	1.19765830841397
CHCHD3	1533.94648324477	-1.58715916282701	2.21517257071752e-28	2.90875815718004e-26	5.49111497961349	5.88556943008455	2.04788471619262	1.61356821052359	5.93913104407086	6.2217027307594	1.94416510884809	1.80485577386682
CHCHD7	1089.03545596776	-0.63100307022576	2.01896803008125e-06	2.31804266611621e-05	4.15911263147871	4.12580992698078	2.65357036247922	2.63111235244092	3.42700459759812	3.72526769819054	3.0043712168351	2.81508318975267
CHD3	8316.05520908213	-0.568976298953007	1.18674883515387e-05	0.000115556357058719	8.47165452995259	8.71725601186423	5.24725878098956	6.20349050634295	10.204772683406	9.47528554904838	6.46354898819541	6.28360711732872
CHEK1	1174.66451696474	-0.457065019223641	0.00140195337981736	0.00747395327632233	1.81068554904551	1.82573199867734	1.46673502119048	1.17678157447769	1.30622366791173	1.44466578314304	1.26265489993449	1.315473970688
CHIC1	1287.62477725541	-0.663774666378948	2.51305510808617e-07	3.47892224532912e-06	1.49036334447315	1.51458822513142	0.942697039811511	0.932609615005196	1.0559941684703	1.17195995027276	1.04692101567204	0.78655802522189
CHN1	3593.52510150437	-1.05987695709698	1.85340961370259e-21	1.44065316237515e-19	9.51383958435896	9.78680652902027	4.85693441619823	4.30323786348425	7.54717745265215	8.5662061276201	5.2448637712443	4.86838488449373
CHPT1	1423.70256273693	-0.529962737766563	4.6375751376553e-05	0.000390312406576154	6.90251103079421	7.19823758041936	5.19352242420253	4.53717409509186	6.08749461892149	5.87920199711167	5.25576922432595	4.74691273943615
CHSY1	4337.56094363167	-0.552717838576718	8.30318181923034e-07	1.02463990971798e-05	7.28289925830873	7.59659464453824	5.40784665047353	4.71768298086232	7.14988593982498	7.13181112353973	4.99938290850111	4.67464256624817
CISD2	782.715410247112	-0.743921076622805	6.87759167935769e-07	8.63690134292597e-06	1.0891025472778	1.10404545664145	0.699225328351949	0.592909227819531	1.13466910493627	1.11982224309261	0.818956255088508	0.67065511610838
CIT	1275.39595039326	-0.982973376546872	1.76411325673552e-09	3.55583186249597e-08	1.3750220078311	1.20214697810152	0.742436222921418	0.527624282649992	0.702752781668014	1.09413821254412	0.574967101635332	0.625453962670966
CKAP2	1927.38180789706	-0.644317884684407	3.07207455834697e-06	3.34001675254363e-05	3.55750144804353	3.59325664168561	2.56076160040495	1.98538459376238	2.32899943206159	3.28676497993633	2.43474296847109	2.20338462104435
CKAP2L	810.875322216254	-0.708551612621492	1.0090559164279e-05	9.93266467953953e-05	1.37930393757498	1.39115525117897	0.947466101838118	0.726183898467947	0.649420100042675	1.03861107976417	0.84082774610615	0.690938035516636
CKAP4	26351.6313216911	-0.437962205766573	2.38358821894501e-06	2.67425794281994e-05	67.3618752578459	63.6619207890962	49.448517799573	47.2201321251522	74.6842331119689	70.6800166888484	59.0765376889578	56.9924626371037
CKS1B	576.936826487884	-0.741238049624057	2.87360553993301e-05	0.000253525863846014	5.20501386408832	5.12568054679331	3.48368808448666	2.57794818837713	3.24866002598613	4.2878164936542	3.44522867738072	2.714445786887
CKS2	1139.7564035863	-0.641226400756167	0.000393914283337015	0.00250596927663835	14.9347182033903	14.8737540657992	11.4400773960897	7.36533227644979	10.8511943136031	12.971936404296	10.385021049002	9.55069513671192
CLASP1	4818.51396935397	-0.325969904364268	0.00461757551717136	0.0203694419014164	4.28223746516192	4.30917197362551	3.28716761286132	3.54422769501651	4.74035402315688	4.55888868839314	3.53620241633547	3.70331952102408
CLASP2	2595.18239940298	-0.405186721016371	0.000545688215801316	0.00331704859267991	2.44154103233386	2.61272837663806	1.94418760135364	1.86611229954483	2.26601318724508	2.27756104011299	1.88380699817412	1.80556125495107
CLCF1	188.054574107673	-0.582889266706508	0.0114769079249774	0.0424460431187638	0.824341838994549	0.705430824575368	0.50235113168618	0.469424513379482	0.709734635865138	0.667747185484565	0.438989131268032	0.499773376139165
CLDN11	2209.55121545479	-1.07827308985584	9.1946414438361e-19	5.52700113457259e-17	7.11971871113272	6.72086840457658	3.10733717381148	3.30620099602399	10.3505110735882	10.0076625436386	7.58696287610275	6.84233302355759
CLDND1	2304.92467009372	-1.52300753865761	2.63855400826649e-39	6.86277749265466e-37	8.7259102167065	8.99917309310655	3.10135530320774	2.92788763811559	8.43041071170417	8.14223807287298	2.70787525269713	2.64243570878875
CLIP4	6329.63447534109	-0.356428570869994	0.00199752567485057	0.0101223434815863	8.63851671798713	9.4088352261977	7.55872397987237	6.55827180298269	9.07187764015969	9.13257295873643	8.317318047727	7.20753524263669
CLMP	8754.09466791292	-1.01374895523328	4.07096029986776e-23	3.74556041195316e-21	25.682994541944	26.3918155342096	13.462587667687	12.1232453580719	24.6363660581796	24.5181180993585	15.2594626259729	14.8592666278251
CLOCK	3883.91065519326	-0.473938699572643	1.80848433017633e-05	0.000167417868347946	2.59040167895799	2.74325431794931	1.95546098431589	1.87640481940115	2.1895359526573	2.46212288332179	1.9327389213684	1.84612261755772
CMC2	513.951467425794	-0.500589696562798	0.00311485159964885	0.0146584439405883	5.83649124665582	5.06015977054361	4.06071689327997	3.52840251915103	4.80086896058843	5.36192903269832	3.88205758693765	3.60806327762052
CMC4	188.973663928932	-0.806728977216222	0.000801099904718784	0.00465215809846352	1.52524836033033	1.65232252862461	0.986421892675493	0.725336850337579	1.35808376490471	1.35576557443895	0.99652841747909	1.02465020429586
CMPK1	7207.35486527591	-0.49318012218675	5.63587687187274e-06	5.80985020518893e-05	15.3368836339533	16.1766802356707	11.9028309883958	10.471844648426	13.7285377189911	12.951384149558	12.3926524620047	10.907681198164
CMSS1	502.675664499028	-0.472404722704377	0.00482468178183578	0.0211308852533565	2.87282568317184	3.05693639717791	2.12800382775965	2.08538049777722	2.44185131354925	2.62372993336621	2.17575399989843	1.81365542993648
CMTM4	1295.8080007626	-1.19733333700718	5.77642112449785e-21	4.2459834624366e-19	1.46284475551209	1.47008377219477	0.639659029117066	0.611159871788234	1.47257508420576	1.4113858696574	0.617766553361696	0.618814046898036
CMTM6	5530.46624606874	-0.800655898647636	1.27160662995873e-12	4.05624520523391e-11	13.0817739220204	14.3487700445324	7.96111681565031	7.65940347709968	12.935537738402	13.3219105594006	9.16857430976118	8.09629202264004
CNBP	7747.4727400049	-0.380284723399959	0.000214277718682211	0.00148773416076843	16.9190904881749	17.0325922063689	13.8464282751403	12.2705357544073	18.9137297873593	19.5845825994955	14.9571991363318	13.6110872780973
CNIH4	1824.54442689557	-0.323005506134525	0.00931826191102335	0.0358464920603763	5.4383875839051	5.74953504231373	4.73785953235427	4.21778237766602	5.54839873853988	5.73775283407863	5.22494373002925	4.54834796099462
CNKSR3	1150.47357052701	-0.361383964039862	0.00793199432843755	0.0314697046911463	2.65216528054466	2.61971207451592	1.97747753469475	2.09282101551347	2.22172712983237	2.3807972890147	2.20537306779588	2.26948871936971
CNOT9	2172.53220134316	-0.954384041124839	1.46463203703431e-16	7.17722764524964e-15	4.88817116112087	4.88651305991074	2.616186665446	2.37398583825519	4.06477055198641	4.25129264314145	2.58373288919192	2.5884569716965
CNTLN	1599.63375307822	-0.496130793629431	8.62580066779792e-05	0.000668561341157403	1.12730242525477	1.10946417274027	0.767179383782887	0.804026811668968	1.03916837540916	1.05777459713704	0.873540298525758	0.917152817489432
CNTN3	2824.09776230926	-0.902880774104658	1.06813858893381e-13	3.84217404663026e-12	4.76212619970692	5.02287965094848	2.80308266486346	2.38062365123711	6.00841553536089	5.78561836699335	4.32941449955663	3.90085262465818
CNTNAP1	3853.0207454347	-1.21727187522641	9.75962374934926e-30	1.41934313128977e-27	6.72340129452543	6.29029166195717	2.75091253897951	2.75423228714272	9.44579229301603	7.99596761812639	4.59143109603938	4.40337597096868
CNTRL	886.207206328877	-0.460564314161748	0.00255903560608453	0.012432096469933	0.85694838425283	0.919061426479492	0.606599121327355	0.665757897941231	0.999700020370472	0.955311770327745	0.748285547907373	0.778667476788416
COA1	1572.57442401339	-0.328246072256765	0.0137865662422431	0.0489919360027163	1.80736857482595	2.03217046479917	1.56188790729769	1.49285505362635	1.69765638738276	1.93044668795604	1.51468981015756	1.54072317608567
COA3	927.343011819762	-0.787849637683311	5.32290645121529e-08	8.41031655989331e-07	9.87928353481288	9.29030482624956	5.97573228353776	4.97459968203653	8.55036409284087	9.19238702858816	6.64789352186709	5.89705351857476
COBLL1	1928.00364598854	-0.684095883073061	3.19864844031521e-08	5.26939344156678e-07	1.58786275262425	1.6134152726732	1.0677934977058	0.913379804137149	1.6505166789924	1.84793505887499	1.91672025539347	1.78956717763363
COL1A2	468277.871639549	-0.392511981012535	0.00016531307451047	0.00118236876401592	677.507881866384	612.293476555964	530.387863482077	452.144460206408	834.858530834845	732.307383310235	592.925337129668	586.395450597367
COL23A1	452.029684475773	-0.881954198579188	1.84258971542575e-05	0.000170128018271961	1.53107929937175	1.03369711277371	0.703573253803429	0.610678881939819	1.88929211160169	1.31218528751437	0.957450454527567	1.13645614404107
COL24A1	499.73219201145	-0.608969661335235	0.000930429247739395	0.00529854971607382	0.555702099384352	0.672820529490496	0.381906686956945	0.402320172987244	0.787932733535053	0.769622924423176	0.454686695385723	0.520261246405405
COL3A1	85550.6384977327	-1.33900100976131	1.29796028497477e-41	3.81628540310517e-39	148.355275371724	145.441359109781	56.2176978432328	58.2700383869272	244.813005758052	187.036514597739	69.1214858676441	67.9729286313501
COL5A2	62275.73893499	-1.0129129706469	6.83868566754525e-23	6.20759890292279e-21	77.8894688773781	80.0795970440609	37.9728561826908	39.4822428261083	118.23671203169	88.6300279311604	50.1802901487328	48.9469246271522
COLGALT2	606.300086295564	-0.393846646231708	0.011586250620859	0.0427263028302082	0.774234604692035	0.773380255479171	0.616976156790077	0.554026829113316	0.781451254975627	0.815830563437098	0.628479715718177	0.585886640431444
COMMD2	1829.68213640907	-0.378834925359139	0.00224341667589191	0.011126589857513	3.53159596830844	3.63440027893574	2.95174778174028	2.56223434160356	3.96224849984321	3.71182305887951	3.12051148637939	2.76004049447903
COPRS	1614.70597757247	-0.721294922409796	3.21628242663561e-08	5.29199754504217e-07	10.7658192414895	10.3310154167005	6.95390963757329	5.74206797044665	6.88511452061954	8.93779985918839	6.67667228170201	6.61780450417834
COPS7A	2971.83173760521	-0.393224671034087	0.00127370352831659	0.00687423791719147	9.9347875355833	9.28630265916659	8.0436704338933	6.59048975829987	7.70964845767123	9.07882584092117	7.32401334023609	6.83313436873945
COQ10A	237.219110689097	-0.621515327592949	0.00510617492547577	0.0220924554917018	1.050323828438	1.06709898762275	0.760690010955001	0.571805852715083	1.23441102440989	1.22178513990125	0.9933694475097	0.97892177430228
COQ2	415.311803801733	-0.478312775062679	0.00718677412395029	0.0290499462123215	1.87278947106008	2.01385504579189	1.41853271612806	1.32983606618644	2.08852489014894	2.4085286964553	1.62507922080637	1.68167244256086
COQ9	894.11881676811	-0.529850430528701	0.000249421058898881	0.00169603812046625	3.98177825546982	4.25301870590064	2.8102750372371	2.82780053829392	4.04459987597412	3.67969145288629	2.83841381192464	2.82892531202887
CORO2A	284.397695250537	-1.02729086395512	1.35715268418294e-06	1.60309956799776e-05	0.445279671319913	0.439828339145805	0.236838418721594	0.173961177549402	0.517199577194416	0.532130336920027	0.294193983157068	0.295324840696967
CORO2B	774.397189720535	-0.634234119838168	0.000328941662322742	0.00215549223978444	1.46817004714268	1.37963378640982	1.06536026872592	0.742480020916793	0.856857169419786	1.01585466883376	0.897107043421619	0.911651787532119
COX11	1225.05242265677	-0.45332057707613	0.000609617927870508	0.0036563558645005	2.96459178585814	2.87758558559433	2.28467747641149	1.97059631596808	2.82343360324577	2.81847936499386	2.32891029337483	2.23641885882409
COX14	505.113872071038	-0.669891519260691	0.000157101890289807	0.00112961353863351	3.84540480731931	4.35129962250718	2.75794189780147	2.3026054463688	4.55361540932318	4.65396955593296	2.70745041474009	2.76901129404059
COX15	2263.89488574169	-0.325364533613342	0.00591885450634996	0.0246923217761824	2.18977735043435	2.32104676548026	1.86258971273852	1.73918194611679	2.34695671247877	2.2477755211132	1.84489232629646	1.79145541442707
COX20	1726.25486618686	-0.408360211289602	0.00106248236868764	0.00594295865860231	4.65321969809666	4.95272916180412	3.78058471035315	3.44881089848816	3.38345986903225	4.31365631937866	3.74087489686108	3.29290532785073
COX6A1	2607.56747187823	-0.405101467951545	0.00648251333709159	0.026697927187626	36.5455769151876	31.8282027525327	29.7907563835046	21.6632311159745	36.3290875150225	38.9551506246463	30.8818230536283	29.4098934433939
CPD	15157.3278178699	-1.16835917457062	1.46247133970623e-28	1.99797220904311e-26	14.4838150264522	15.4748951019294	6.58769679753056	6.57080996359566	15.1906943596005	13.4939447254813	9.07206022997749	8.66826022207808
CPED1	25751.2704806279	-0.800957929831379	1.23772930837554e-12	3.95751510538515e-11	37.7839339203243	38.9365202889716	24.0745189596161	19.6825495822219	31.7242018800805	36.2276282438621	27.9323655756362	26.1194959296356
CPM	157.724041564411	-0.93404195518489	0.000677526624581406	0.0040155773871444	0.201757119586961	0.221641274516876	0.0730036995584831	0.116550549282226	0.586621293674073	0.537950619538538	0.141198197227541	0.149554904049228
CPNE1	4766.31995619815	-0.46881603780826	1.20118323713647e-05	0.000116709793694474	13.903317359563	13.7140440759609	9.80843041378264	10.0660394577164	12.5266014849589	12.3771580399642	10.0492672883086	9.73680016559268
CPNE3	6386.13857919535	-0.454473685117297	2.18659865535861e-05	0.00019968768949173	9.80989502127032	10.0971212605359	7.74168011244391	6.78755449625785	9.46508651878798	10.0786470226432	8.20821103530957	7.15919940503404
CPS1	1384.32027593104	-0.832886457558315	1.30321185243235e-10	3.13071763839209e-09	1.90012354559108	1.8927524397193	1.02508456893785	1.06634604739905	1.88863454542054	1.82574781341264	1.15966498511448	1.14751549310083
CPT1C	948.552998567827	-1.1137702859172	7.80094935913768e-14	2.85156324546857e-12	3.00071080423705	2.46339311789246	1.24743825526925	1.19280800320266	2.43961389392403	2.36776413682415	1.52965185967926	1.40804351152731
CPXM2	215.266929013302	-0.606653690996031	0.0136579995357794	0.0486766339446663	0.428703603444082	0.501274746334877	0.354051388731759	0.233261813607588	0.614931228854982	0.522974556305464	0.42231516311999	0.387401015550719
CRABP2	218.968311906179	-2.42223056083858	1.50370220916469e-23	1.39298440951729e-21	2.19449102299074	2.09108866806476	0.390593486087531	0.254826458684209	1.37582081395985	1.56653626064271	0.783256968703044	0.830068262551578
CREBL2	1919.51768595829	-1.39824415192623	1.19261370942085e-32	2.24029172498847e-30	4.80978346927772	4.81097661897911	1.82432664894573	1.746333957938	4.56114639709049	4.83476682617396	2.25755898550835	1.99766403994473
CRIM1	58980.9091805241	-0.409230426871831	2.21438961450143e-05	0.000201680939637252	79.7214691987735	77.5812308502316	58.6403131074889	59.6690474189506	71.9779880954457	74.9932147015246	72.4905929855491	64.8040043632291
CROT	1356.35389842782	-0.415822474225627	0.00218514143107315	0.0108934898102707	2.38071692852341	2.58926909947	1.82348364106581	1.87702065382598	2.72164735169511	2.99751036571109	2.22608165608681	1.99228366873776
CRTC3	1229.80134554779	-0.491843683340717	0.000177555107102115	0.00126125673506098	1.90782492394623	1.69586318724009	1.31780336069427	1.22486532313649	1.82399287109075	1.68537978629728	1.52791045168902	1.60561472830379
CRYBG3	5169.55107608456	-0.432678035495422	4.18419251893526e-05	0.00035614351050094	3.55153443718435	3.693229520028	2.72486037010894	2.63598887384449	3.25807946549446	3.12190494556796	2.72261200465071	2.73956918230076
CSDC2	1510.4875406685	-0.476071447426143	0.00434934885350057	0.0194526928715593	5.42681149618243	3.77526205805719	3.18794684105788	3.28871047935083	4.28106699973071	3.78100511930735	4.81981664713571	5.38317852553321
CSDE1	27452.2314486894	-0.705165192253968	6.9012110439254e-11	1.7032642220637e-09	50.1055362914322	53.5211704457565	30.9727575441052	32.1513828013415	56.9806742097012	57.8167638528321	38.4089749530098	36.7884258734477
CSF1	2558.71644933495	-0.836801562651394	2.0918384265461e-12	6.34352347960449e-11	4.63884120159062	4.16042056414046	2.38471985412731	2.46694147366688	8.6762128317635	6.44096686146053	3.12560167445784	3.16415881685027
CSPG4	12205.257801489	-0.485702406907199	0.00315121491048239	0.0148038144023183	13.2651845205723	9.45758510551814	9.30909889196275	6.70513962185584	14.3064583386055	13.1594507138633	11.1938475238442	12.1363669332959
CSRP1	15175.9562161578	-1.49460054135816	2.00113085322888e-50	1.08261179159682e-47	62.7708590928373	63.9929957556812	23.4329066079127	20.927827673919	39.2850397435056	43.9508348371319	27.4121402413846	25.9671941796912
CSRP2	809.853560093967	-0.825842277560599	2.08564934069253e-07	2.93779748993476e-06	7.57814900919054	7.23947057096289	4.64009827056495	3.57434295575848	9.8738857932034	9.0917448468978	7.35065025850773	6.86875050379507
CTBP2	3826.12185541167	-0.444914338045419	3.83116117119633e-05	0.000327744812399939	4.62507917045623	4.653460106446	3.60105024845451	3.21403376189406	4.54613936435249	4.45427791040918	3.82742278947413	3.67125277929406
CTNND1	657.247855351818	-0.485862414807482	0.00126073147570313	0.00681783015149331	0.804531512050777	0.786359643082145	0.577084345120543	0.546715159249489	0.672527213626988	0.632948588292367	0.65566625871463	0.636768275913853
CTNND2	37.8846471470257	-1.02422206937449	0.00329411889090345	0.0153366464714179	0.0684484744994753	0.0599558950689457	0.0233913986180357	0.018686625538909	0.0796072678735725	0.0785883663454578	0.101631319245536	0.0749056932388562
CTPS2	1717.33247722237	-0.450947358772463	0.000268901691560771	0.00181120287766904	2.56492277860383	2.72155134054879	1.98846266305356	1.86765170546708	2.15836558749875	2.33388964487766	2.64565914778873	2.56381136933447
CTSK	26128.9241707409	-0.517342224493475	4.08658912581279e-07	5.41873705162921e-06	107.708097303981	115.216233559972	79.6367377221979	75.8668505305394	100.010286629455	90.199264685847	99.7005631768821	92.521294463112
CTSL	5007.05615345686	-0.485538061596841	0.000202196734640263	0.0014162148296269	22.8552671115823	21.9478314668377	18.1435915623819	13.7756114214487	36.5249446696978	33.6701888777397	21.9106768985424	20.9885561754454
CTSS	861.429828971399	-0.751081614654401	2.57863705434584e-05	0.000230661813227695	1.64479125945922	1.83256760134217	1.19336153297966	0.8335071421973	1.36005667079344	1.19480898860902	1.08034917855101	0.955529113946373
CTTNBP2	1119.32329808619	-0.630856435482376	1.7633793065294e-06	2.04542925564409e-05	1.48751892285482	1.51150931839426	0.973272604951295	0.94299640397508	1.78185712195659	1.85979659658886	1.33753263297101	1.29806517159009
CUL4A	6507.83683474976	-0.706150376398453	2.11460261945573e-12	6.38392866699524e-11	11.8897638990236	11.6910030746699	7.5471631082152	6.8535479203929	12.1074325845633	13.7573199298255	8.4868524330276	7.98583752250982
CUTC	421.924682024091	-0.495897759147125	0.00680883578197276	0.0277628893431358	2.2829955437576	2.4736048878327	1.82790898971665	1.5067196009043	2.87856602456308	2.97990104618171	1.64392354425452	1.79474084141094
CUX1	5019.86469599429	-0.398895348269064	0.000297530410176307	0.00197356488358732	2.54269066159489	2.27042026016936	1.79736853744779	1.83715555624687	2.77505418235896	2.52651268172396	2.19051652840889	2.15767514532843
CXCL8	310.446447621337	-1.20986478758492	2.17085726329183e-08	3.69318798566315e-07	1.474765539754	1.93052408841215	0.709308607251412	0.649722827425229	1.68796355989382	1.58460899630233	0.57483251902529	0.698653847948446
CYB5A	2137.86403006607	-0.639130992120251	3.45770564726456e-07	4.63943143643385e-06	19.7825203208877	19.9189281454866	13.8715968773722	11.5029187123915	27.75087809315	24.5427122336467	18.8353310656015	16.5905748648833
CYB5R2	279.695361599552	-0.562945763377137	0.0122250595886434	0.0445670972874401	1.2353808839247	0.991921759531912	0.856885751854703	0.602308552859918	1.07031273346651	1.24420090519731	0.856871345460849	1.0880400387822
CYB5R4	1287.69374486948	-0.612225974077577	6.92960125258122e-06	7.03625052110818e-05	4.36957149454314	4.73804870370804	3.15240753957085	2.76674281220263	4.54480620265137	4.35917549351481	3.19524922279326	3.09832235798648
CYFIP1	3874.93175438881	-0.486418302869139	7.67629685911621e-06	7.73635730399007e-05	3.26059772983288	2.95545356065701	2.32629747731588	2.09909617497699	3.33194857773328	3.42236115328513	2.67350673870031	2.60571291715215
CYP27A1	425.410767479935	-0.593133710165391	0.000648880530194793	0.00386442499818784	1.54479594915271	1.40958441056901	0.979491949394278	0.933225898347466	2.29766954265966	1.88189091256437	1.17293841218165	1.22658827486951
CYP51A1	5046.55000778879	-0.531025309541697	2.88493430574704e-07	3.92937930364841e-06	11.7806850574711	12.0249697466904	8.45971320966062	7.98102575185584	12.162398627839	11.9713076251596	10.481350370243	9.56643090278578
DANCR	434.559574543389	-0.566215783632384	0.00119089902626992	0.00652101592319862	4.08459266614778	3.95005287351375	2.59496607121956	2.69395269612492	5.34768572264607	4.38820088486898	3.10123955105312	2.71678290171532
DBF4	680.035548583165	-0.556350776230816	0.000639052019110113	0.00381092529032817	1.41996684458908	1.31182731701801	1.02869547719581	0.810325856291969	1.02770497007869	1.24619736862142	0.853683939039717	0.760530898995668
DBI	3096.2126192956	-0.478724872054907	0.00034032017052068	0.0022182314729119	16.0649808968052	16.9546437158598	10.8976888223389	12.5494824025548	17.0299967911642	17.0526938264759	12.3222793572849	11.903752809396
DBP	130.54880239465	-1.13408611594393	7.8744100230673e-05	0.000618475003263561	0.865023738329806	0.517212433752614	0.241007611868388	0.270749702279516	0.721959381981092	0.695849862750415	0.344010266651795	0.434852974045954
DCAF16	2110.143057669	-0.421328556215492	0.00038098703360408	0.00243518413492211	2.36038881993299	2.46770189571653	1.87954656439478	1.72197681301265	2.39106744689453	2.64228866615696	1.85513190130396	1.70560932537239
DCAKD	837.105358951648	-0.457588696150736	0.0018198761549553	0.00933402540605628	2.69275902042425	2.5937358095376	1.84043253234336	1.95558814846197	2.31838814000317	2.44598497012336	1.81763597712355	1.60240713366901
DCHS1	10329.5344460618	-0.677724368597542	5.72468046435656e-10	1.26101471140753e-08	8.4135243823869	7.13580253170613	4.97119827183609	4.67693323219428	8.04066726283654	7.77750104150322	6.24811778911795	6.01501164107816
DCLK2	1667.05698453685	-0.718784832961048	6.022047828356e-08	9.43217946749024e-07	3.34190688795979	2.87518603606202	2.01584605439172	1.7191296572079	2.64216063519078	3.03684449873214	2.85384787841861	2.99441358874827
DCN	66832.0845382465	-0.475957625186353	7.44395307096028e-07	9.27921339029841e-06	106.947844187055	110.822289096858	80.3281182198602	76.179850991474	186.449311074859	171.775997789235	122.840187857531	117.097824465753
DCTN4	4134.22228070333	-0.343507590650578	0.00117155084831237	0.0064202695394752	6.97979513303403	7.07956845244769	5.599594584245	5.47587558657357	7.54636077567881	7.53034573611542	6.08793879277206	5.98563769320651
DCTN5	5267.75355560218	-0.404686827513451	0.000131379793517915	0.000963122857043282	4.93566589680405	5.09002275951039	3.7972491889595	3.7648902470858	3.48595717778633	3.70955642790921	3.3004824689744	3.05184285654989
DCTPP1	407.065063084663	-0.773703710997422	7.42543518090113e-05	0.000589026456432187	2.45591562832261	2.56170921324065	1.64840237553792	1.2066709042189	2.74796818796274	2.99702120996554	1.71323753463845	1.7897820582413
DDAH1	8130.92623129597	-0.625780809444879	8.16381334158604e-09	1.47417323691524e-07	13.6546634732916	14.3323053544115	8.88287537337376	9.14682202744877	9.38906944505735	10.1654355980498	9.8719475291706	9.03051595192197
DDHD2	3338.45786122189	-0.439480882024588	4.79467204457563e-05	0.000401535228500838	4.34384445021878	4.37585152356574	3.24166661934902	3.17271241094142	3.33188461738205	3.49423925818166	2.83202103006233	2.88213166425056
DDIAS	269.407112915495	-0.610092670525216	0.00821546824334419	0.0323474039182236	0.59089927423631	0.623897350322478	0.467028344981629	0.304115550559933	0.369128526639705	0.522491048105944	0.424339300221018	0.408621103261082
DDX18	3250.62822909034	-0.468999839987054	1.47020291926535e-05	0.000140130334623424	6.5248403780442	6.62956769937774	4.89066616763304	4.59674692262336	6.54057858815432	6.98580868338758	5.01259495604412	4.61928027542647
DEDD	1165.52232298653	-0.383927117686324	0.00518841267254709	0.0223339533406109	3.28127481741345	3.57091833431488	2.75273348335183	2.49012226182375	3.07378141990954	3.27925015904231	2.78708679734108	2.71835420472383
DEK	9746.94564163878	-0.323294324271708	0.00871056680728224	0.0338730350973238	23.6818573271603	25.7923496768233	21.9328241957908	17.6890416725502	20.7573168931388	23.0806968538625	22.4858043510194	19.8833791894958
DENND1A	850.761962648064	-0.413005680817482	0.00364782425790559	0.0167527412863066	1.24656184374564	1.13771372801057	0.930834603674927	0.848247536705306	1.20166030356976	1.31729786452961	1.07525131096074	1.08342948996244
DENND1B	1303.25384704975	-1.00275941056201	1.45517625308207e-14	5.78860553615737e-13	1.02592003659541	1.06981374951272	0.538993285653521	0.490055273320324	1.23209347693037	1.08463106226211	0.606723228748102	0.547851543750585
DENND2A	8161.8242775834	-0.421278184045795	9.27853226164229e-05	0.000711003676140011	12.4006623652556	12.3213024539863	9.99700043830487	8.47589856610784	12.4074171632546	12.16121127916	12.0651425079257	11.8437215113093
DENND4A	3000.93215012308	-0.513129426100948	1.48464499083119e-05	0.00014130769529199	2.52133580791779	2.72226231403595	1.82333653763049	1.83205777980353	3.21383843084345	3.14159076934654	2.1098214588224	1.99050858573113
DEPDC1	1224.62010830863	-0.932013063735308	7.48431404895006e-07	9.32093439337473e-06	1.93579819244573	1.98931568765263	1.23235620714578	0.756400273130018	1.19077789750693	1.72222492047213	1.05762736217168	0.884726714699825
DEPDC1B	234.940016311095	-1.01306392278387	0.000260158132759653	0.00176196231626155	0.940425728178114	0.777117616518262	0.512026879477875	0.239332837198715	0.398565676831958	0.732026779808888	0.367136063964362	0.333004539746993
DESI1	1786.31745326582	-0.46781946454165	7.67757543955481e-05	0.000605476430437194	3.58726836291503	3.58848742821065	2.68188858790083	2.49141503627638	2.83848379339025	2.96420358999357	2.49715286445312	2.40885293101483
DGCR2	3012.39933864575	-0.38554178398122	0.00344151435309947	0.0159515015852194	5.5599121002923	4.44059434894989	4.05461081061973	3.56103848780143	5.75070621765919	5.07734257930353	4.15229069995769	4.11623904378323
DGKE	788.364819959461	-0.39428004803946	0.0083311397260096	0.0326841823543751	0.746300511207975	0.771037843512563	0.55836364596655	0.584068573930622	0.746958642782572	0.701757327968288	0.609333185835397	0.538420757806476
DHCR24	6629.46213414621	-0.4723094146342	4.78127617194408e-05	0.00040066146360312	11.9708979690546	11.6519910441944	8.03223516664996	8.87958589832217	10.4657547755199	12.4469887138752	9.31706642248741	8.92461736681073
DHFR	648.858874188911	-0.84818434645088	2.34808937932538e-05	0.000212854616993135	1.30170973325307	1.52571595838749	0.919283757217927	0.59962478150431	0.685362618938252	1.08702955501405	0.874780255548942	0.844754212940814
DHRS7	1622.60106409857	-0.403320738867073	0.00103400969476835	0.00580530557149936	5.37005188295278	5.52949592176799	4.15027161626937	4.06145350749238	5.48088946418803	5.54111825485915	4.46435360113061	4.2037626095724
DHTKD1	1436.45868334302	-0.484547945620152	0.000170868406924633	0.00121823679686646	2.19567407953706	2.03312588825506	1.46582839859977	1.52525048898467	2.63815082930501	2.65525747874213	1.8509756929364	1.83679910332571
DIABLO	1689.7809587818	-0.444972416542818	0.000401270423912539	0.00254677732680295	3.56421613337833	3.81909927816311	2.8200691788826	2.59145474844409	3.80234548179952	3.7327270831717	2.96839237163027	2.9314790959889
DICER1	7751.84207342663	-0.964104477128086	1.07850906691786e-19	6.9461119666972e-18	6.08632851032786	6.48790169235882	3.31650624564525	3.07418327075834	7.22299598532329	6.56123078819043	3.34416066954052	3.22302894868357
DIMT1	918.211923354134	-0.398160981488768	0.00614759264256687	0.0255284588549945	4.32575565180391	4.47801390098766	3.61501420965759	3.05587336133089	3.83098344879563	4.29209664568956	3.64508777747295	3.12401176016126
DIRC2	1094.88220177686	-0.435086420532436	0.00135407473399601	0.00725480620300622	2.53264329803008	2.43332943116337	1.78208951060863	1.85394185087672	3.01391955180323	2.71786238857473	2.41110295463239	2.41747188810111
DIRC3	555.142788981527	-0.822834380242966	6.85070507082959e-07	8.6159932204167e-06	1.15210251995459	1.25136796168905	0.658813013000849	0.660979843192268	0.871495096207342	1.02409878063232	0.818890548666826	0.69464921830853
DKK1	3134.91930067817	-0.369894025184072	0.0106093552991395	0.0397924377207048	13.8698025555313	11.8952301531235	11.4254632109003	8.46306199018482	13.0641833416713	15.7139551976044	15.6118952576842	15.0138002463215
DKK3	50934.302159713	-0.480722760994672	3.76309499431265e-07	5.00943501949592e-06	132.564931511486	124.295926171105	92.1357679725095	91.5860576843797	123.192019484995	122.037197678426	109.658920581963	103.78734234109
DLC1	14951.3816315711	-0.54411840976154	3.50509996435002e-06	3.76540722937522e-05	12.6713932472036	13.5504395026105	8.52495871568039	9.33566234492473	9.56699517667196	9.98206694217513	7.53174223285308	7.49829132587338
DLGAP5	1288.43017446241	-1.05589398069986	2.2735996328817e-08	3.85343797427631e-07	3.58809555593663	3.9119959704678	2.14352233816394	1.32099785987166	2.04199439516987	3.31229854120453	1.86490842914708	1.6351384669857
DLST	3487.51751611809	-0.872882621561027	6.97009330181824e-16	3.19561057312175e-14	8.23485102562643	8.39425610842012	4.68420388283462	4.32618132515485	6.84048889369479	7.68888139528747	4.92160372903228	4.5058971778309
DMXL2	4033.33114729944	-0.354613307225718	0.00157174048683619	0.00823945352110833	2.73293289013845	2.86840769330967	2.17137695983904	2.20171402757857	2.78467272034092	2.78596138697834	2.24938631640386	2.23153441814637
DNAJB4	3067.72168620994	-0.572336743530142	5.58865238768622e-06	5.76996362927146e-05	6.17473771082657	6.74667770908877	4.70992880463072	3.95145341327701	5.39977792060991	6.93734297942611	6.41760168619235	5.62371369882966
DNAJB5	578.237414683516	-0.716444043593233	7.70763386805895e-05	0.00060749270434439	1.48218999944847	1.70810320792462	0.863973451032932	1.00856721556177	1.47793285375448	1.63532513138526	0.917608205857293	0.943186590424882
DNAJC22	688.698796959058	-0.722464474275294	3.54233493112558e-06	3.80238729710107e-05	1.30266817525221	1.26184498357861	0.836755358246554	0.694936887989224	1.62726012573626	1.5038667794814	1.15892561590896	1.12796667886267
DNASE2	1385.45010981999	-0.547508579734285	8.5204849816297e-05	0.000661535932127105	5.87851810054805	4.92092977685709	3.93970330170439	3.38093630228364	7.35892147936778	6.52304640218314	5.18740012434819	5.56317430430928
DNMBP	4415.79426043063	-0.401885930592218	0.000116416282573287	0.000867032060464593	4.11318620604579	4.15940588492386	3.24400119217502	3.01721898809991	3.43380590542461	3.51492730697732	3.43316990082905	3.34502654571845
DOCK5	6596.15696744371	-0.383847448268207	0.000155171428489167	0.0011175152131608	4.60620318956902	4.59453463527562	3.53318387012858	3.51055644319763	2.9697636956477	3.59654478774776	3.46019784916298	3.6386425817094
DOCK7	10397.5755652208	-0.680801130380224	3.69612092272249e-11	9.48577523336274e-10	10.2999498014565	10.7191606992287	6.8771762863411	6.19269220082237	8.72798653882958	9.59698274529395	7.55104570504361	7.54121908615671
DOK1	1032.6694360958	-0.416920924477413	0.00451380585571644	0.0200161390814967	3.10603049938121	2.70161530350239	2.37179574610246	1.95673231590542	3.96076402086446	3.78877201309718	2.90162168667442	2.87859657805067
DOK4	359.570097926021	-0.589013130881925	0.00140869257145974	0.00750692160322814	0.977734933091702	0.881786903557927	0.607774616924157	0.593165287371986	1.11202769134796	1.00052962648576	0.714893527891519	0.669939975763673
DOPEY2	2275.2766395605	-0.350825201243287	0.0045237033084213	0.0200312298951204	2.28550250743645	1.98872659264091	1.78937944617901	1.55639738731621	1.11987337102381	1.43427986486872	1.55614509754493	1.6230121236494
DPF3	1741.53457751268	-0.770432753310307	1.10891931145485e-08	1.96567938236263e-07	2.92484987568535	2.86794769603792	1.8747172571519	1.49000940644382	1.48343621810945	2.25711923841761	2.41125759822251	2.28991151647285
DPYSL2	17152.0533970072	-0.32740102049614	0.000754749051004542	0.0044171271808033	23.620052083423	24.1531906710355	19.3684547360117	18.7422793353652	25.7090516327059	25.2115572223993	23.9301680118274	22.575344179329
DRAP1	3650.36301926133	-0.323131000636734	0.00590519745035263	0.0246429483233629	28.7825307433799	24.2782473766983	21.7599048124011	20.5304588459914	26.4965490483831	28.2510743078964	22.5886633612951	24.4957539856153
DRP2	1393.25754334881	-0.503402190726303	0.000385100792017264	0.00245683406227995	1.46769400949123	1.55500946025411	0.993870009140151	1.1102487980155	0.88581725405358	1.09846439147039	0.861373591642394	0.890679504777023
DSE	5285.1037139095	-0.493998470227111	6.78455352041234e-06	6.8993298017727e-05	4.58392032259802	4.93134217018921	3.45176107862484	3.29024653193367	4.40568326673179	4.4653533353458	3.76135216666205	3.45567120905815
DSN1	718.76143923807	-0.584578534613966	0.000130005625982682	0.000956131642966707	2.26360016184423	2.24855303272198	1.61485034214725	1.36604982293451	1.49074387366467	1.96095393880701	1.69942178457854	1.73792958969483
DSP	2025.17522646978	-0.534198244041425	6.3453288790433e-06	6.4868158041618e-05	1.69085410110936	1.52719093115682	1.11295698356321	1.09222488000752	1.43894470818838	1.35464684178684	1.40225065479037	1.29370106426108
DTNA	327.432718946086	-1.21188995670009	1.93669534019342e-09	3.85770316290369e-08	0.310681225658038	0.262572148063656	0.106807127889516	0.120199522384853	0.363493597777079	0.360443175874249	0.231603689664322	0.217776171341004
DTX4	1604.97954780096	-1.38133693666119	3.0451694820455e-28	3.92246830901575e-26	2.63002593767654	2.60177824211626	0.961492505028506	0.989602169799674	4.69555573193047	3.63837046194117	1.72613565993132	1.81554390736427
DTYMK	1032.36814014175	-0.417665184899928	0.00480468204005253	0.0210642867396144	6.03820356811949	5.38372828528294	4.72034525545523	3.79674598163088	5.01165896413328	5.99485975173025	4.91050286195056	4.31130499316324
DUSP10	2796.96040246436	-0.601623459958953	2.30065040618521e-07	3.21117613453611e-06	7.83887592118931	8.33810228077817	5.3369164661363	5.2586120363827	5.30365589559407	6.22044524030687	6.01314213164394	6.05947256828893
DUSP18	344.624980684804	-0.719657089090402	0.000112384572188444	0.000841173956197405	0.820470792122299	0.822156038887269	0.487969140864944	0.475925930202694	0.792399704436596	0.773994414364916	0.615961777147688	0.546073885803521
DUSP5	4512.52554867129	-0.42790277377987	0.00012473494435495	0.000922383883215253	13.8185306059864	13.0620950089562	10.8051507649437	9.17233306145215	16.5073888882417	19.1994389256271	12.9231203182769	14.146604248647
DUT	1594.79087636792	-0.397287021529122	0.00913312132481498	0.0352610674908212	5.05930632853234	5.10697882091737	4.45918727835223	3.25278127088679	4.51708558281446	4.85695446435441	4.79591952629299	3.97407210302131
DYNC1LI2	8002.07544413078	-0.619401485293122	7.60868662723781e-08	1.16940325719763e-06	13.1726979714021	14.3161484959022	8.68076820525747	9.08602371461301	13.2616164112988	13.5618022640292	8.48988326404738	7.94079391930553
DYNLT3	2251.59320590079	-1.05136383979509	1.44537296520844e-15	6.38845403740003e-14	8.68578940344792	9.37052730071884	4.71474539403397	3.86670942348198	8.42426608947461	9.68470989237833	5.24220175086889	4.17196430159618
DYRK3	516.344893814063	-0.403767418572372	0.0140925049520452	0.0498694739603378	1.760837006499	1.67167990650525	1.26682890410309	1.2891312855329	2.24122391438799	2.40676871932964	1.64317681541316	1.63030389598732
E2F1	329.651389239132	-1.05641414408695	1.64458930930581e-05	0.000154251528490714	1.13823982296652	1.08716461736845	0.63987892876384	0.343027616628784	0.604593120758266	0.816785991674723	0.557156790404099	0.553934747386779
E2F5	224.642906517896	-0.772091472458105	0.000547713893636442	0.00332637198537624	0.998344381307126	1.04674691326613	0.523374260411295	0.595899634620772	0.882268921837994	0.893572764971124	0.482257087884618	0.509061884936795
EAF1	1250.31235835091	-0.787211180860997	1.28789590929922e-09	2.63521818052525e-08	2.35222923342922	2.2928244949608	1.4121729947001	1.25034051830325	1.95136310232824	1.8889487827466	1.21040078129233	1.14867863385805
EBF1	165.355723856231	-0.681921955115411	0.00488913250936321	0.0213376951239553	0.239194159712508	0.265164848754087	0.145877267745204	0.148461367199493	0.256789588219141	0.260544659689186	0.163916344049619	0.152540210773058
EBP	759.620975385988	-0.621194721028469	3.00230106953144e-05	0.000263095131758175	5.37281035316362	5.1367744256693	3.28511740437097	3.41649855598042	3.06250375062845	3.9936690048548	3.84147940268403	3.39755909721861
ECE1	18341.2899705591	-0.884760480958889	7.31863570722596e-20	4.82851453366981e-18	28.5567432319459	25.9746478512712	15.172990339396	14.1601901439314	36.8646837927047	31.4611699466034	21.2910050849986	22.2227651687285
ECI2	2498.81827349903	-0.837203635229718	2.07637281545582e-13	7.20075444334357e-12	13.2829573548107	13.498680455916	7.80970444826132	7.0616918946242	15.3402049630211	15.9680612749777	10.2975635191141	10.3495226193762
ECT2	3540.53166296758	-0.427850128353966	0.00051848376533828	0.0031659110276299	5.76732814195306	6.07444068455036	4.83344336085191	3.97104911485557	3.97140315341686	5.07468075866477	4.5129700022732	4.10892128548317
EDEM2	1254.78355038439	-0.771680388271191	1.48883467906972e-09	3.03260377024367e-08	4.9351406377546	4.85193706509599	2.9598216696992	2.70968407134444	5.69790110400984	5.21511774618858	3.80058060835453	3.21409575261644
EDN1	836.291191525424	-0.449027537614404	0.00345260976943224	0.0159765620241021	2.8413760330268	3.20704836885993	2.16933390210237	2.21526658301866	1.94517705473479	2.56401094232585	1.92110555652322	2.17757281542249
EEPD1	1421.94069542253	-0.756698645393766	1.47418986981263e-08	2.56938376149688e-07	2.64620203288034	2.38687654634195	1.41235671159669	1.50851387274848	3.11638816690446	2.80681849180793	1.89818240461004	2.03744226574127
EFEMP1	9545.80109243315	-1.6460004825899	9.31380056686986e-28	1.18838823270674e-25	30.4728001362803	31.5060831996481	8.09084487019784	10.6609993707569	67.8281478644794	54.3343466393278	18.0092902721851	17.0771012156948
EFHD2	1531.36179329021	-0.933502863547648	9.99003254234144e-09	1.78252229729773e-07	6.4719313041681	4.57294793649767	2.93201850259274	2.65510031789855	5.68324095791039	5.24109789517848	3.34181005481206	3.58658193674155
EFR3A	8755.07898399409	-0.333642497687922	0.00285114680821453	0.0135542216453784	9.10474081115593	9.50217203785846	8.02612711514841	6.77028190714706	8.75108567508199	8.55579802233112	7.98862891208288	6.91800150989274
EGFR	16885.626432702	-0.411950711611941	0.00109394846840879	0.00609591871594591	20.0062633049568	18.5681609537834	13.197397198036	15.5633269768054	18.3281220581303	18.718856457167	16.9491873186598	17.5551590796428
EHBP1	4512.4390775979	-0.494355889708341	3.00346679064416e-05	0.000263095131758175	6.27674064789635	6.56939103062234	4.36033469142722	4.69906222367424	6.89217904666671	7.1676548405665	5.40995893052441	5.22238824963786
EHF	177.149183980884	-1.78869597586142	5.62986859273704e-09	1.04164121363568e-07	0.362742623848733	0.321684149271854	0.103201462456381	0.0375722643209814	0.386893580628261	0.299661698499972	0.114523030802564	0.0856711702083736
EID1	13205.0550920506	-0.562055984006818	3.2624954353534e-08	5.36151285093009e-07	48.3299653165905	50.4610665209908	35.0152882350358	31.8000409727309	41.7349191996703	41.6801467401957	34.979447118953	31.2438862100663
EID2	548.776681840917	-0.507137405674481	0.00169794167762442	0.00880546824764966	3.11591042427856	2.99271268554251	2.08884797843336	2.13151952142754	2.43258208649451	2.25478349199509	2.19801135416875	2.08083156699936
EIF1AX	3844.86074540411	-0.459039947160638	7.87410993525225e-05	0.000618475003263561	6.40659608962042	6.77194230632722	5.14881020932056	4.43521907437711	6.29256256755724	6.87950567951197	5.7029097214379	5.21837258803862
EIF2A	3245.6976332917	-0.681326550778475	1.2192968575167e-09	2.51004413971284e-08	6.49775936141127	6.67898130195149	4.06084807679179	4.09228769144729	6.69280937583277	6.68614592893209	4.7056303192468	4.57504689519049
EIF2B3	1420.57823983638	-0.354571690049275	0.00969411073318128	0.0370166142479607	4.53507239434248	5.07149629576485	3.99073098349836	3.5232845733701	3.86824982475668	4.18113388714793	3.7848301353487	3.59782294505651
EIF3K	2863.91283670151	-0.520769931524651	1.57974502291677e-05	0.000148892344494421	23.9116275835885	25.7350934802811	16.9539442698052	17.4315693859611	17.2490154559699	18.3025822191709	12.9065486772323	12.3981936567641
EIF4E	2048.55932925937	-0.592836421885865	2.364732287916e-06	2.65639569718138e-05	1.28767999452888	1.38731279423422	0.94192704151914	0.824239152351202	1.03166120491609	1.11206271477822	1.00057581068918	0.898349454022886
EIF4EBP1	1664.21029396379	-0.427604928830179	0.000737295537276432	0.0043205901826966	14.6709085628793	14.5517462551586	10.4797278143848	11.0779856195395	22.1107178574567	22.0166570091599	13.992306737527	14.0368333022269
EIF4EBP2	6197.2392723445	-0.483108817520263	1.42194873618704e-06	1.67233536147215e-05	6.30271003755888	6.28534100830788	4.58091940713194	4.41005651612666	5.44770384296499	5.01618410509494	4.77485138213433	4.75487188581981
ELF4	1411.05868086172	-0.854735303718553	6.47754250639226e-10	1.4153273408555e-08	2.91961504276715	2.70367175942264	1.43249063849888	1.60050269738191	2.41222320532579	2.2526273519119	1.77490576105494	1.87132674181822
ELK3	5195.7431996405	-0.363236692921184	0.000933699719437036	0.00531046623439273	8.69365452828507	9.15279871903833	6.89596072817308	6.95876554683393	5.98065999442129	7.27791697036581	7.68071337203213	7.19855690130944
ELL2	16142.0893027829	-0.719683440148326	5.1053909827271e-11	1.28108372989581e-09	20.9414176415768	22.6876672808385	14.0531169089587	12.3181163065048	16.3264966966823	17.5336113313096	14.3331361486538	13.4107411156455
ELOVL4	349.802372849147	-1.19975939291698	5.86556653566283e-10	1.28785369147467e-08	0.997807637016101	1.12740336064183	0.439792947942949	0.428289959631671	0.869724143605423	0.75189237583502	0.511471919889681	0.415234792419033
ELOVL5	2676.9837953691	-1.06901928436647	6.43697095858382e-20	4.26764863798266e-18	5.84033229564867	6.24058158030772	2.8959530572142	2.77921332579136	6.68864463369319	6.51360980702627	3.76802123959136	3.2335095425479
ELOVL6	1309.72050380614	-0.631241342055769	2.22422191879846e-05	0.000202440117441111	2.89752512517942	3.28841656079018	1.86310329230596	2.06034293526948	2.00482995044877	2.40359942875977	1.9397155626472	1.91393461633224
EMC2	1554.87798496084	-0.329234122020404	0.00880062988598526	0.0341643281308699	2.73365183685858	2.89210182575436	2.28845791870587	2.18475238206067	3.56450070549786	3.28712421653304	2.56515202103538	2.49827447717805
EMC8	1023.32374481162	-0.406253692532414	0.00283371733889049	0.0134998333950313	3.87838628142275	3.92483682661042	3.09894444332285	2.77384562486223	4.17368982620206	4.18738523032427	3.48722920497911	3.14202434941121
EML1	7026.74331581969	-0.751178910248111	1.13558480337156e-08	2.01031210282726e-07	12.318067731305	13.3647631638772	6.94650121187489	8.06967557520851	15.7913596828341	13.7499974865596	10.7458870506438	10.7012241418229
ENAH	7523.08085834081	-0.664883247880005	3.95726532266877e-08	6.37926263278845e-07	4.49520899171896	4.71513328854219	2.71534282260264	3.03107949672498	5.24183967447671	5.16837170751688	3.4043258764737	3.10696226342364
ENDOD1	168.282590174757	-1.40065589479086	5.12265519350813e-08	8.15104841084676e-07	0.35932130972879	0.348578172985303	0.14144261538389	0.0915818081271619	0.369268255165351	0.380409292643246	0.249313714009931	0.194599834130963
ENO1	82034.3665996629	-0.633206953935361	3.49438710776733e-06	3.7568828006799e-05	203.843542347193	200.068225234564	150.61199332431	107.776335720634	215.832405838499	245.286232322466	162.973382657719	152.16474746358
ENO2	3221.54929614379	-0.520081801506269	0.000146068160840164	0.00105928786882747	11.0034750561577	9.62354467298237	8.10227912210408	6.2033277081591	9.11904374701203	9.93297852565929	9.38175693292911	8.9939868890876
ENPP1	1421.4563665022	-0.796569403907309	3.73576302270362e-07	4.97886003591075e-06	1.61563854152701	1.58480893646685	1.05690125611957	0.757695333851698	1.93464469870255	2.24880767819224	1.19446161486305	1.28052116178672
ENPP2	183.594007305789	-2.50762513712693	9.81896187073832e-17	4.90042285246257e-15	0.588817903821304	0.562840452946516	0.0942657198002635	0.033791068342267	0.941870504911514	1.13181679080012	0.224171392398343	0.209335123869543
ENSA	3410.89681237813	-0.378671918716809	0.00105311855471163	0.00590278841793404	5.84963222665651	6.34643267723479	4.86788981766592	4.5126885775191	4.88267384393895	5.61294852361685	4.37892610683866	4.13991968138346
ENTPD7	1394.62661600965	-0.445929177006883	0.000797120638614086	0.0046350200504108	1.19666935777735	1.27453539983244	0.88644951969634	0.914205687800851	0.776815102154526	0.816866587194103	0.761979479570772	0.713995740193642
ENY2	1533.1148118066	-0.471359590746521	0.000256112268828771	0.00173891487746442	3.98318371228202	3.8788607112072	3.07072628961637	2.58836955740114	3.63688273174368	3.73725785623057	2.9205799496989	2.59731036991945
EPB41L1	698.604804668099	-0.539971111789915	0.000312622270863331	0.00206355110464936	0.835937126333797	0.781086998328859	0.547788285515085	0.5470127467137	0.980231453520342	0.922749047133159	0.715226301261519	0.755229022013247
EPB41L3	6265.88533043591	-0.432497268843317	2.79657499087017e-05	0.000247537151515177	8.68428072704076	8.75280261750531	6.82060203586888	6.10430237397004	6.88339837674655	7.8575471505148	7.9806998699368	7.40988749618195
EPB41L5	4845.60483381604	-0.572847014175304	8.71887726603655e-06	8.70279077661582e-05	3.18817986169547	3.36620120591278	2.0304869713532	2.32637994920189	4.0638242784933	3.6947866284856	2.84566752794527	2.74727086381539
EPN2	2611.51803060109	-0.91914823112236	2.4041508225042e-16	1.14898020757489e-14	4.82910004264256	4.47619311243246	2.45238745157756	2.40572138944781	3.55382951842175	3.8838991688359	2.7813317260936	2.61700976463061
EPOR	142.02049719964	-0.890164003621148	0.000398660878386032	0.00253378213353904	0.485740618539982	0.443673959814413	0.23315426554148	0.221576629535938	0.491617034584461	0.464748142767618	0.313390107098687	0.270515977502645
EPS15	5137.58804207202	-0.526594209722861	3.55740556608853e-06	3.81553610478568e-05	6.91531829411122	7.59961679199426	5.11782755334293	4.92510389690382	7.52626101231155	7.48007740148689	5.93202515142659	5.70292290392899
ERAP1	6797.01899872651	-0.904059974757867	1.71881800512223e-14	6.77755496188867e-13	7.62550040828164	7.72838618801261	4.49620434679478	3.63588436394484	8.46510834938191	7.4946287605258	5.04471341919795	4.79860561057715
ERCC2	2234.33982218805	-0.565435999415628	2.7448334234144e-05	0.0002437549051325	6.37369019873666	5.25214860735545	4.23217797322449	3.55636422991995	4.86250391467925	5.11607535243543	4.93604758827918	4.63881169181406
ERCC6L	378.182838594761	-0.696133680094958	0.000585838535825815	0.00353726169510899	0.725764527993646	0.747902404878346	0.518736374011946	0.367637506321346	0.411926770024006	0.578665690421187	0.420784187061029	0.339777935084982
ERGIC3	5659.79331640419	-0.683463275706288	2.09171394228815e-10	4.92007496859953e-09	32.5273602315717	34.5314759451277	21.1349391879018	20.4004086618372	33.568252871644	32.4145584458237	26.1633056907448	24.9306163825049
ERI1	1743.97187317136	-0.34244250938149	0.00613885309957789	0.0254999963672577	2.70694509543696	2.8328984544222	2.3249749296249	2.04885273280541	2.64197691172981	2.82371597634027	2.67191609620561	2.32304296788059
ERI3	1291.71530567937	-0.342239753326271	0.00662542186064469	0.0271459650606542	5.4239799755747	5.37850498687726	4.37293778037798	4.1304733123476	6.12748405289092	6.23401096542946	4.67977071038719	4.58155696443116
ERRFI1	22941.1341556986	-0.344362814599614	0.00464227830943044	0.0204630349025768	52.7508275216374	54.8572676179249	47.592307083458	37.2830450277007	20.1262726580501	24.3141072866327	38.8839398654721	34.2818770240418
ESCO2	327.84683438947	-0.724166166866173	0.00514890554992493	0.0222133804027862	0.805258694554388	0.830919092756191	0.625517206153423	0.305555728297195	0.304114935597309	0.471940731403988	0.438931793837221	0.419771399460984
ESPL1	597.083558129337	-0.618636716201737	0.000912022452040056	0.00521568865278721	0.784927946376851	0.661321111488617	0.539567481194967	0.383880414022673	0.424029801113294	0.638570771437419	0.50130574734038	0.427664250005787
ETFDH	1255.11317204113	-0.413969298046208	0.00114843824278419	0.00632951395014515	3.86183302123429	3.72452039494316	2.96630819510888	2.70978083354737	4.11595490817847	3.97176612110397	3.37806775128762	2.96108771814021
ETHE1	888.629115636495	-0.627010900965904	2.26542493505532e-05	0.000205774830400425	7.82895222889556	6.7992421532222	4.53251892212638	4.74340450867676	9.95826365142488	9.302058246845	6.55341063957828	6.00693024225418
ETS1	9028.68111694807	-0.42153303699071	8.31110259150374e-05	0.000647136802245757	11.5725843128359	12.4956868126359	9.14791027588122	8.80767401967091	7.31340982493059	7.73647372021448	8.9223148850708	9.10065622955632
ETV4	503.846433071579	-0.619055538341548	0.000186472565230157	0.00131974957861741	1.48894149384511	1.43584357125433	0.922145809385355	0.937283844997371	0.96391013380391	1.14105767968218	0.853043717816028	0.841307273077362
EVC	12452.7772468207	-0.506963089725177	2.31194669185185e-06	2.61447148890437e-05	15.3887972602708	13.453994297591	10.7570888584608	9.48137214237777	14.0188486367852	12.7702187129962	14.1994340538698	14.8321878761265
EWSR1	7565.11717120289	-0.523568051027173	2.01236729368915e-07	2.84401960785222e-06	19.7127850239766	19.9519584855088	13.8828674515659	13.6396950741652	19.0634479846071	20.8594775352469	14.6752957265529	14.7555519127716
EXO1	344.786590389051	-0.807443595731462	0.000222821797340111	0.00153445255042006	0.77818619871273	0.908846163293819	0.551569449677852	0.374186512175348	0.393305585879362	0.595643974211912	0.559614705975442	0.514208380018478
EXOC5	5747.32305338051	-0.409017859946451	0.000264414190889038	0.00178631465123589	4.84776710029559	5.25237780906035	4.00964521025847	3.59926860177479	4.66407939157009	4.93214618340266	3.9840272303866	3.45313944343273
EXT2	7701.68873087456	-0.422630580374375	3.44218691703857e-05	0.000298051075883141	14.7676566423385	15.2611746350745	11.6519025788674	10.7561504581992	16.5354625167299	14.6028130323688	13.3608754538281	12.5174775746218
EXTL3	4337.78540352335	-0.496104631637694	1.97266981675234e-06	2.27066887417663e-05	5.35888801899026	5.15529430881642	3.73329993296127	3.6945964813836	3.60345165063296	3.99943716354471	3.46804936499024	3.22330919698781
EZH2	596.478893073364	-0.488333719872125	0.00204121373751302	0.0103057963244353	1.55126879009091	1.47090953804369	1.14111964152861	0.992953691473696	0.81544133328204	1.17920568840673	1.06606536431974	0.987439209615542
F2RL2	1258.29247083658	-1.7342094124908	2.17564718058959e-37	4.98739459618207e-35	3.74796219444951	3.70499699734872	1.17739844331183	0.987720402983917	2.69164306849502	3.03472315139738	1.53325578207125	1.49378264398776
F3	70366.32711148	-0.520108776404207	5.650697170126e-07	7.20996973829756e-06	218.762965633304	235.721211291839	158.662305871164	157.481473607458	190.842279277381	198.776332656795	186.650593878357	186.194543107948
FABP3	154.900230905432	-1.24576265465106	1.1201790450871e-06	1.34193282416324e-05	1.15989561381901	1.06661154626865	0.352337444499346	0.444309023905522	1.61993770604564	1.46546270207767	0.75862698056648	0.73969498928968
FADD	1319.2505522692	-0.42260800876051	0.00287630039083816	0.0136498115038899	5.51944321609014	5.19728459972765	4.45572523008899	3.52490522531785	4.79721429967126	4.5441559856701	3.96485269332849	3.71068477055655
FADS1	3285.31720429468	-1.47763031448479	1.01052473463625e-28	1.40900484906756e-26	7.26909636016255	7.19322809010777	2.29999825478272	2.70076042051622	7.64023098871624	7.97658694402444	3.30546845314813	3.08132164470566
FADS2	4553.90305637534	-2.08639197394659	1.10157757780956e-62	1.06420262427674e-59	13.1849451516406	12.1034540305999	2.66039185704691	3.02199975617167	16.7061796689128	16.5012778631215	4.08281845134694	3.9359787432691
FADS3	3126.40850763376	-0.388676985993534	0.00201893661116599	0.0102117119169858	14.2909649294888	11.720996724499	10.4622937772844	9.31984910964626	18.5149581684673	17.2727155481528	13.9451629865124	14.3576461356686
FAF2	3980.91021808567	-0.43799264311549	0.000131833181180662	0.000965895869701223	6.46420229960597	6.84172266650162	5.24434431701674	4.57794722290007	7.7433536912848	7.63325045505221	5.51435458216319	5.49504963148717
FAH	1443.94397954674	-0.62029387638444	4.40326369585169e-07	5.78195548411593e-06	6.54655094068994	6.26591510818835	4.21001091168055	4.05077785521077	7.84843564889418	7.91586276431718	4.9593634477463	4.79118734554035
FAM102A	427.591089597745	-0.632882153816063	0.0011087572780468	0.00616609464867719	0.867558761888999	0.731736747261704	0.446681845907075	0.538889163306018	1.22577842694088	1.10748735572659	0.602761036247306	0.699020863218099
FAM102B	973.375310415777	-0.463162456042379	0.000913017559612958	0.00521917265163367	1.3453586117071	1.43166445193413	1.02509285512788	0.976597130620283	1.71680750649313	1.58220254479526	1.08984193424295	0.919552610880211
FAM111B	466.830622906001	-0.648055478274565	0.0121396083770872	0.044339239346504	1.10089388362529	1.04999735833887	0.896027159179484	0.40276882687034	0.356200433048902	0.592322763893415	0.776396323721704	0.717145575129938
FAM114A2	1324.81099405295	-0.512527447525148	8.54092334296119e-05	0.000662742330542456	1.97853156772454	2.09720459532488	1.43735914528319	1.40037506478194	1.74352331340815	1.84550878458969	1.48533464656261	1.28324538862626
FAM120A	10067.4274564702	-0.346210267664348	0.000352995443883681	0.00229091332942744	10.5763749532848	9.84885254593646	8.24627788913467	7.82270568438795	10.0709173387282	10.8394594036966	8.93068773284572	8.35865830024846
FAM120C	883.651499755144	-0.372768550452348	0.0101236450979134	0.038353585419966	0.751813359960005	0.800993566332116	0.592484183848448	0.598458252249289	0.783640232239536	0.777003368918992	0.640858420643372	0.684438257569919
FAM126A	10621.2938522033	-0.588538894954355	2.0506465243188e-08	3.51075876473567e-07	13.2808504702501	13.9378714473144	9.56163709825548	8.50393040430344	11.0330962324063	11.9649912037076	9.89008680206977	8.69319791802324
FAM131A	495.103369998218	-0.660129601679664	0.000888480133662635	0.00509911193965509	1.67546309103238	1.20402681171275	0.98548198654538	0.77583157079615	1.21632668286467	1.22186056397483	0.923628903878452	0.865858913737415
FAM160B1	5006.11504869139	-0.54683476126745	7.07542881623757e-07	8.84428602029696e-06	6.15146947063782	6.53832345229497	4.56278269480427	4.10669870657257	7.3097711462291	7.54614280389362	4.56275858662292	4.2349211055863
FAM162A	841.77120740291	-0.617653870525137	0.000160359703471801	0.00115059150634276	8.10867542730268	7.9265556787511	5.93541759760907	4.40643365457444	10.0537567044392	11.5860927096035	6.97201516306279	7.02055871624647
FAM162B	217.412263408555	-1.04422584806509	5.25932082671596e-06	5.46331138105479e-05	1.98405765661503	1.81461362427882	0.983028795255971	0.727463177440671	1.86691593858913	1.67714919315449	1.4373823831064	1.41810096518107
FAM168A	3802.79027818476	-0.506669074451065	2.35374076397394e-06	2.6484479062186e-05	4.09367486397981	3.93338732061118	2.79823419145142	2.82451897881196	3.81476683607763	3.70504005930479	2.93399161047221	2.94970177489455
FAM171B	1464.41355930603	-1.03494154389367	2.34180317385793e-14	9.10140457655992e-13	3.61792980060128	3.69614322480094	1.6574612092164	1.81773135145807	5.45363378950224	4.59215533705006	2.74197223662623	2.6824912209623
FAM175B	1136.26748055083	-0.724975479175923	1.44020164259257e-06	1.69233077463637e-05	2.90471407700877	3.33782335131793	1.79003563962344	1.91091686009292	3.00720223675937	3.05039702078674	1.85369070701412	1.88226993083415
FAM20C	3879.44470664118	-0.64589765237382	2.84489556381545e-06	3.12315036530876e-05	7.26262897545399	5.73643201430586	3.89430638120635	4.26571642373706	10.5866196867145	8.20512989881733	4.6138394956635	5.20068628394888
FAM216A	499.641760893116	-0.504390014010926	0.0034046258152911	0.0157913457310741	2.43383716852711	2.64111396307713	1.90708232583929	1.6337491196904	1.8769022818346	2.46046344990772	1.89814936662684	1.61855573672212
FAM234B	693.050408324701	-1.06839205780152	2.45475795177578e-12	7.34526577384234e-11	1.38943283778935	1.24896656616247	0.642745584077097	0.578230277634146	1.39752944210059	1.31317306647525	0.901518629038106	0.882186633119082
FAM45A	1739.46282713176	-0.434419956696813	0.000438868276835143	0.00275822186068555	4.79273601447229	4.94598552182337	3.82082201749268	3.37837037600797	6.28626493421854	5.72669205397139	4.80842441607101	4.44380413810639
FAM46B	142.502648302419	-1.19754460230447	1.02539311999153e-05	0.000100788095551493	0.680896534105343	0.469575092438896	0.241305825794194	0.186141652316031	0.475791469599389	0.58310578843068	0.320033386538312	0.362390305620549
FAM69A	3248.83470688102	-0.881710022190518	3.35367203397377e-14	1.28859131419021e-12	8.67728809860727	9.19094409436301	5.11427154201781	4.50149275394928	10.0606949298286	9.71012224799309	7.36223638820518	6.64770100726272
FAM83D	641.081973443332	-0.69631696331673	0.00116598186844304	0.00639752729034163	2.20503169167756	2.13632597720092	1.65021407944359	0.944135560655841	1.26076290584662	1.79543625875588	1.42884766113734	1.1165842990589
FAM92A	1566.76673679771	-0.418722347051047	0.00162048876891675	0.00844590003838115	5.12736641572045	5.74278694846188	4.18093866651439	3.92745547798315	8.11903452127765	6.88220186470048	4.23414818451107	4.10095926067613
FAM96A	1076.53831696411	-0.467523425763179	0.00123831324726405	0.00672347919279254	2.15250668159349	2.31121008018029	1.75626812101295	1.46313146022535	2.94643621036961	2.66719645897201	1.77125594535678	1.54643473043776
FAM98B	850.488310118426	-0.474409196425979	0.00349971735746215	0.0161658733810367	1.46896931064813	1.50776402461027	0.957377747613125	1.14157067172631	1.34348512600938	1.52949749888301	0.978267961936425	0.992369043698575
FANCA	698.239634868849	-0.678922383025562	0.000176713379706063	0.00125593718367026	0.956669246160951	0.881992451517174	0.665988101749609	0.461469935537986	0.466566591635971	0.635942100626752	0.624022156666309	0.634496050279346
FANCB	439.536862798616	-0.450229443666489	0.0130388890223804	0.0467898577945595	1.06565193737706	1.15079373886125	0.883666266116914	0.724805206924151	0.695386867336026	0.785279805913283	0.826537436691743	0.792380572473758
FANCD2	838.669621669792	-0.723726941682057	0.000304786591786623	0.00201734195740245	1.12129627122805	1.13388642768544	0.831074189646798	0.497643213738773	0.723448902011739	0.936209155922032	0.641266963334158	0.6328295736635
FANCI	1203.41679367253	-0.736197321529471	1.41400840353867e-06	1.66444418258141e-05	2.05696710178725	2.11680991032893	1.41115035890898	1.06562776374592	1.21203532095977	1.65446555811741	1.35185633690767	1.2569508660284
FAR2	676.209723475272	-0.987999220233454	9.70576424084887e-11	2.37378772798338e-09	1.48510904114024	1.43067412851556	0.703401020448764	0.719446646439376	1.44881817181829	1.37885950048253	0.976434789013526	0.821352970286026
FBLIM1	3436.29044490437	-0.857923018552481	5.41044461921691e-14	2.01587502685699e-12	8.0210722583351	7.44070140656665	4.1090890239016	4.30462463361202	9.55528448627942	8.05649828323284	5.15500584331672	5.04447541850435
FBN2	62796.2921552995	-0.502318958296719	0.00125819814216358	0.00681230179053741	44.1681541674322	46.2797542609804	26.5464524503295	36.2195301703479	124.991650156228	94.7117952315312	55.382227568753	55.3151941757771
FBXL2	761.175694872246	-0.41358931739553	0.00915368976820784	0.0353119378536826	1.89583451033059	1.91292111325729	1.59430886777264	1.25810422922381	1.68913575681042	1.75025569644584	1.59042938351715	1.37650333686909
FBXL7	568.863028847652	-0.417702160749898	0.0121032063085307	0.0442540863268121	0.88821945021833	0.882131779492232	0.618317617457006	0.682928522457641	0.731723333840229	0.798685513467219	0.668487953569161	0.729553968624647
FBXO21	1902.67465403273	-0.805192317976945	2.92725074149376e-11	7.67268726331456e-10	3.66310670428306	3.85834834382158	2.17605139823937	2.08287707349741	3.72295057549225	3.82956532770444	2.40330179225272	2.06523027404195
FBXO3	1386.17364047525	-0.467892393647039	0.000930230373263678	0.00529854971607382	3.55466737855718	4.00783625220394	2.9398473933313	2.51305061907547	3.59263875596807	3.59587734139443	3.08745707015258	2.34336149467683
FBXO34	2049.81062914424	-0.337184557062641	0.00740031011395734	0.0297353518393562	4.14781471814706	4.20113640382049	3.61291801795663	3.00818679809	3.07393475222734	2.97508936108565	3.98059734531385	3.66796510081337
FBXO45	653.134999978319	-0.658471392067392	1.97238592412296e-05	0.000181596457615814	0.91026233064612	0.928518702008718	0.609056040598152	0.54008873058646	0.817777566301255	0.787660857636535	0.564551621502655	0.49405552551689
FBXO7	2805.84119629886	-0.860813293442596	9.42491501180807e-14	3.41747923685534e-12	10.2151364999057	10.3602907094712	5.50294423970667	5.68080927805387	9.15012355955403	8.86228036519639	5.71050156275161	5.94601873377578
FCHO2	2170.73031633104	-0.563273036578743	2.33845360379745e-06	2.63563208261338e-05	3.30933189389801	3.51730955341426	2.36042363952223	2.23737440702998	3.09553178106407	3.10114476850143	2.52592116837397	2.06333073579381
FDFT1	2418.07801969163	-0.80725456241095	1.87210142243492e-11	5.0039865095716e-10	4.60351642881374	4.63408571646555	2.53078937105533	2.67416104141883	4.15305600059356	4.3001080749035	3.40133846805743	3.29607997301793
FDX1	665.063588190286	-1.04439407764962	2.23857642586289e-10	5.20219006182055e-09	1.74893066012648	2.00710887887535	0.939563655180469	0.826950141327525	1.72630610245876	2.19078252279519	1.01140693835062	0.811756051701114
FEM1B	4117.61579550703	-0.910862151098428	1.56319699832108e-17	8.42320294912057e-16	4.9484085565022	4.97360600867233	2.76161111742244	2.47636394530939	4.21803259464481	4.17825458054811	2.53253086547318	2.37597951659422
FEN1	1030.88965169945	-0.566087128181635	0.000602374468075727	0.00361933126642568	3.5014609755796	3.56555659507417	2.75882274797643	1.97514875926954	1.68961914751796	2.31804491460806	2.64292889796983	2.39152569048119
FER1L6	212.479315915651	-0.630107040112404	0.00536352736364733	0.0228982662857734	0.263839401623824	0.304141800784586	0.18784119063208	0.164566020984674	0.9064912000504	0.620048216255657	0.287530772530172	0.314977309073436
FES	212.665594849448	-0.584996912335075	0.00971873745025593	0.0370978346866849	0.675635962341622	0.540678664007148	0.408310784344559	0.365665051896643	0.84643812986479	0.789333224082357	0.498202793207838	0.601404186944218
FEZ2	3650.00551658418	-0.563280653146358	1.33530951783155e-06	1.58144143858772e-05	13.1546532642945	14.1605602947823	9.78846693784757	8.64899515889751	12.4220374391565	12.8325717497106	11.8213020560925	10.7808211043211
FGF11	91.2772865921241	-0.897059959686474	0.00267830870355026	0.0128957369937762	0.239871668822399	0.239794395458814	0.135955389669306	0.086959248873767	0.272172371135035	0.212711973982383	0.211601083746659	0.219235388147802
FGF2	4409.94942519879	-1.12410387339797	3.71010900325338e-24	3.68964884330897e-22	5.67398142572486	6.06655189497008	2.71421303101123	2.60090105298306	7.57318115971702	7.20453105743708	2.84320892115788	2.49510964034123
FGF5	6441.19346155748	-0.51545670126076	2.8547931953828e-07	3.89224576285811e-06	8.75995533076844	8.70968461471442	6.37134063666847	5.83651312037093	7.45655604722989	9.61895789867618	8.00463031676169	7.30016024701211
FH	2436.09188605206	-0.333519078420849	0.00719535487125185	0.0290708260760139	9.03210983694275	10.0375097108841	7.89977103889821	7.24336332791239	8.30005827422349	9.43946637475487	8.39112797740603	7.72372577107905
FHL1	2888.34651733379	-0.609653603283981	7.76221520543863e-06	7.81712290793429e-05	5.35926654447613	5.74802715051931	3.32773187410255	3.84612929364313	8.69397797210239	7.43301944525287	5.04669675005097	5.06613170527744
FHL2	9196.20757422806	-0.390345660651373	6.78225917027106e-05	0.000543102754753796	24.5979425289978	23.9981837839451	18.6381002867584	18.4064210857117	27.3991871465187	26.0300811673124	24.0986140167682	22.2175865704908
FIBCD1	415.979522086591	-1.01340681140202	5.10022859667577e-06	5.30619936692614e-05	1.36023731437946	0.895251924495977	0.596532520503661	0.440845532337005	1.35732148530433	1.31868907832786	0.747641522428283	0.872283590981075
FIG4	1438.94299515838	-0.384262168593158	0.00196695207820476	0.00998237405542941	3.41921844053182	3.4691545093555	2.71179811457811	2.55394247106398	3.31137134756949	3.615811504647	3.14670018647199	3.07978341659829
FIGN	415.604619048627	-0.465332824935544	0.0121763654361762	0.0444374912369894	0.457582712917334	0.430829830380349	0.29063281849737	0.334385469729773	0.308556892636233	0.339632213570772	0.254449668668303	0.249225266902769
FILIP1	75.483885667773	-1.22164570925412	8.88742932133344e-05	0.000685695844672189	0.140922942131768	0.134296963829509	0.0366922890378925	0.0505192586312946	0.100750453983024	0.173356213514444	0.0222966767319722	0.0461255633086531
FKBP10	18093.8799281719	-0.516368263594047	3.1601101846646e-06	3.4192392198071e-05	52.6937956072499	44.4671161938061	33.6785392475287	33.8376786177461	56.4364634508898	51.9331379951945	45.0189643859295	44.9175159686999
FKBP1B	195.147310474269	-0.822050200000615	0.000474564293836863	0.00294208284367809	1.38631935846148	1.47652573064456	0.865630201997485	0.661931507216779	1.11469291691102	0.998898463900165	0.710238072907143	0.839995768969463
FKBP3	1814.70804560238	-0.686824437467205	1.40910436086325e-08	2.46867052858491e-07	10.8077308270712	11.037872639792	7.1150996580164	6.3702560798022	10.6197385686341	11.5738714407615	7.06739682502871	6.35741575976746
FKBP9	13201.9449619125	-0.921119793881633	1.9692695116403e-18	1.14803319590238e-16	30.0999956525382	30.7667311772089	15.5887241817903	16.2276328284598	33.3589904501524	31.9353874808971	20.6083681279622	19.4012323366064
FKRP	690.787346547367	-1.08491726413892	1.19852333209257e-10	2.89464786902716e-09	2.01342300963813	1.58736034252784	0.790469470220942	0.825942752626454	2.47639251878493	1.9978582058661	0.931656432376142	0.908662276480445
FKTN	2900.63516962093	-0.594275394069848	4.81525236348347e-07	6.26214309770326e-06	2.94818967857627	3.19905410386375	2.04885561672181	1.99927142596972	2.95721888426946	3.18953882645819	2.61676740713591	2.48522701337169
FLJ23867	3336.9023407198	-0.955704185079952	7.65684706918315e-14	2.80647307888082e-12	11.1977823182072	10.1785744574441	6.06982277380024	4.80529893518794	18.9623999141423	17.1885467042846	9.61727663714666	9.23471247085268
FLNA	213787.510069782	-0.806209000600813	1.10522717956499e-10	2.68369795397064e-09	237.555603396017	184.295869189394	118.465654923945	119.066528906928	221.572986319306	221.25356018107	135.799602192266	138.426428739221
FLOT2	2266.76978598435	-0.575044005251696	4.93246457893182e-07	6.39612496932434e-06	6.59793987021854	6.2886440966159	4.53335847978538	4.08157780408755	7.29737078292854	7.59675170159196	6.13905258604398	5.83783188365696
FNBP1L	137.06800404919	-1.0587875658197	0.000507890636847701	0.00310824473455437	0.240544527321264	0.22597369285258	0.130206324475857	0.0565074441236682	0.321127137889896	0.347818868936292	0.151483629799918	0.129549190946395
FOPNL	143.441797612243	-0.940864359957264	0.000555805289770456	0.00337248386906479	0.260837681045703	0.270967506384993	0.154694469128974	0.0948203016431775	0.309781002563502	0.320869207269965	0.107185953642433	0.10846609042118
FOSL1	2307.80239801999	-0.799876338868081	1.83545162435777e-11	4.93528493428209e-10	11.6059884305524	10.415574564778	6.66025841486319	5.86695668587267	7.21573127607207	9.87905564492894	7.36788785733782	8.25621132380948
FOXM1	1150.48266379097	-1.19173456974048	1.58753196089638e-11	4.32019512497454e-10	3.00791559528011	2.82000447612608	1.48020052494764	0.970472921160538	1.53500294498429	2.1819874697962	1.54283806904546	1.1752089116765
FOXP1	5369.95742905168	-0.481742959074124	2.13294433312621e-05	0.000195447642991409	4.58092752472006	4.85172135168657	3.6240433983654	3.12686289811922	4.61399008279226	4.68129051163362	4.7799192391996	4.62881362838209
FOXP2	181.831804031534	-1.15116264473367	1.34084612902835e-06	1.58660926466391e-05	0.226934637038554	0.252520384085384	0.093768921316089	0.0991944779395702	0.345350175059503	0.318273262295304	0.144889815018595	0.169207884624421
FRRS1	278.21729996287	-0.772789277864002	0.00109487157194421	0.00609639275856134	0.894226411067454	0.859634658554756	0.607785633960072	0.368449906715889	1.36067637599731	1.14433854007559	0.845437861737498	0.899507408334919
FSD1	197.528923362164	-1.70465417888185	2.92198155583422e-12	8.6120952384757e-11	1.15609547548157	1.06426169510795	0.349542047257368	0.23597555715729	1.04717104081123	1.05961239682452	0.444255549763567	0.383381203003293
FST	9389.630064883	-0.903394752970283	1.3741155916938e-17	7.43396535106344e-16	38.9515946003902	37.7383914441131	21.9957378490455	18.7229255114466	32.1923936798149	42.4875745845778	29.883381365898	27.1588640519426
FSTL1	84570.3709831562	-0.554267067382834	7.82370384038914e-09	1.41843960377028e-07	170.027460730499	173.70718546688	122.627850265081	111.246725145611	239.390266889278	216.805465921249	187.848498406734	179.642371329828
FTL	94887.7411273506	-0.621610645185135	1.1747496113543e-10	2.8423056339118e-09	890.076488698082	843.884554615226	598.072010343596	526.561407308804	1427.15768620655	1217.70007422407	825.581801240784	794.539231246201
FUCA2	3768.27639594628	-2.08646123322028	8.25875445265903e-61	6.98122837326334e-58	15.5506048924291	16.0247140300203	4.00049895416326	3.17044755557609	16.2776195529989	16.1299788208919	4.3414814836683	4.1608017330038
FUT10	789.268264056811	-0.789865274595014	5.62623507987026e-07	7.18553630361146e-06	1.79194661623698	1.93778501503368	0.997232411200958	1.09992520066959	1.58350683550795	1.54224545310526	1.14381574471047	1.0970592186233
FUT8	2080.14245556533	-0.727723276295263	1.81276787221742e-09	3.62687654907405e-08	2.94345307185603	3.0897809888955	1.91321827064661	1.70537218505738	2.8092899098923	2.73346347405868	2.0987156331642	2.09272989718044
FYN	1252.95474524131	-0.389381892146711	0.00513696473172626	0.0221972677305424	2.40441778372817	2.41999735156388	1.73602479451164	1.91004723701058	3.69459774284036	3.13302173639052	2.81871469392448	2.69253810709217
FZD6	8150.74615477837	-1.21107229082059	2.17566568226951e-31	3.6782347940869e-29	18.6724236166756	19.3947059397558	8.13816871943412	8.08662941520901	21.7322268313815	19.2781786854904	8.61176399563647	7.86127196631609
G0S2	4471.53101163215	-0.803845162407086	0.0120028919213839	0.0438991652884578	48.3154414476228	34.7349266492202	25.2867059207511	13.8952271680031	12.0988249970583	17.7652688078784	18.5482245007085	19.9427504373058
G3BP1	9326.56740975398	-0.518729739471679	3.29941048825824e-06	3.56425933336204e-05	24.9997447821001	25.8569510814672	19.2829680186878	16.1766400471813	19.6673555463996	22.144649273358	18.9872816739444	17.0078742918671
G6PD	4418.812521118	-0.778622733190821	3.73644579404762e-07	4.97886003591075e-06	15.8538342644785	13.5361429567709	7.27802859835586	9.3677709080989	25.1813066126904	23.8082856926259	10.9387207919026	10.5332291969089
GABBR2	1632.67160366407	-1.13372108362509	4.08063982789086e-21	3.01588271432918e-19	2.61864167350977	2.49126942400474	1.1656907629992	1.1195914374602	1.88466905767343	2.31908604875559	1.60011495767716	1.4543620126667
GABRB1	56.5680536682289	-1.51014503612548	4.71173619653933e-06	4.94768882439398e-05	0.252723779615114	0.292372415507439	0.0699146440768889	0.0547573815354433	0.0209945716404704	0.0388609874627174	0.0343626983103552	0.0478900371175275
GAL3ST4	358.351959054557	-0.728430376566558	9.11629978746871e-05	0.000700954830162105	1.20993996929511	1.12448390176542	0.733885178348084	0.63394172781327	1.41632769174162	1.50719942936603	0.981106445521892	0.945772848431786
GALC	1958.82048348251	-0.764316128746341	4.78358545396587e-11	1.2070521131509e-09	3.93997494693108	3.84914929257245	2.29398948398457	2.24424396606912	5.90915551722312	4.9705031278196	3.04377869501301	2.7799226793836
GALM	686.437670231675	-0.677457191946832	9.65791244056824e-06	9.53454494588945e-05	2.17403919301535	2.31122164308171	1.43188457319454	1.32990143472793	2.48639819585649	2.35691445521465	1.78388903894989	1.75373151983461
GALNT1	5580.55185060259	-1.13100693796439	3.29506634190373e-24	3.32580390106328e-22	12.5908868839734	13.6703514176282	6.00593967242273	5.82078634323267	17.1017360673453	13.7854712251213	7.95193576337083	7.52650251712831
GALNT15	5171.65970648969	-0.560805012165363	2.59736840595367e-08	4.35308645483562e-07	7.17288297851498	6.92373828210178	4.93218131561585	4.60043697455266	6.07627188985468	6.50868628768095	8.1653276989912	7.72672767662557
GALNT6	2630.21341539779	-0.966038207198285	5.39201687086883e-12	1.52886851527255e-10	5.40847059887046	4.75895312048522	2.90694881296242	2.20642112856294	4.49812413250467	5.08602057567366	4.0206728961583	3.92822333732533
GALT	889.583222860043	-0.424301282016642	0.00556333077820352	0.0235778292037213	5.26245878312406	4.30518753431571	3.77311639545668	3.28953215779037	4.41613716648378	4.33515289938186	3.87179807760597	3.8670587173882
GAS2L3	1089.09115490549	-0.893591646501107	9.39385362722098e-07	1.14255279054104e-05	1.52388452490451	1.42569096658636	0.939131182283074	0.602397376741991	1.07832548874084	1.46252156196213	0.949251876746185	0.77801531527697
GAS6-AS2	1186.42371296243	-0.480798711167284	0.000831030460184187	0.0048135704385401	4.64478941226856	4.7077464806538	3.71774201171858	2.96593061024676	3.16312086596993	3.5739234846441	4.56559761072173	4.18128018878827
GBE1	8955.40106101391	-0.998148454714128	2.08621635223541e-13	7.20083318430952e-12	25.3267340199053	25.4847553593813	14.4566929934147	10.5666413766494	25.5112261756621	27.5561686257291	17.4972631044357	16.5391725991808
GBF1	6554.25202850234	-0.541718003605607	3.98865199947768e-05	0.000340141981670464	8.04133794427572	7.84178841459511	4.90232186155912	5.87248365424277	6.93882328813496	6.98817505904489	5.83858474529196	5.74844695595864
GBP1	6212.53573664861	-0.72412666657853	2.69417218222644e-08	4.504163011695e-07	16.6224937825535	16.7783403014698	11.4065182224611	8.65640279610285	20.0413389281328	18.8495495749571	16.8193262986966	15.5160393473375
GBP2	2759.80896854667	-1.31283784166119	2.10113121378485e-29	2.96018746525418e-27	6.18196406282967	6.36959245075992	2.44050221174602	2.50297256567228	8.99845530386282	7.33804289172574	3.95692625060378	4.0488407034276
GBP4	321.535674668015	-0.853536594772387	2.95875944726102e-05	0.000259852087819515	0.438418327086	0.457284809207152	0.272272580882939	0.204900428637689	0.68615009096579	0.467632485802379	0.337533405829541	0.3553906405824
GCC1	1361.23170287348	-0.420509482479854	0.00236757780487433	0.0116526527696235	2.61526057814239	2.35467390097014	1.74730275574963	1.91989789131608	2.62501754806818	2.36591811118613	1.83688165629794	1.79379018506286
GCSH	167.899144009704	-0.701509574757168	0.0045368278828442	0.020066350645223	0.875838953167579	0.934973325613402	0.603047898780239	0.450661616736738	1.18210495294905	1.04903610130989	0.57797030805012	0.464709288980013
GDF11	801.186592364108	-0.486558233747413	0.00672204787579631	0.0274669781027629	1.33839432465626	1.27091933592584	0.779291989248245	1.02866220734803	0.988851397610993	0.970968243706815	0.793515672315032	0.752498301169994
GEM	1173.98262701867	-0.837695757070969	4.45422829443453e-09	8.36714412253153e-08	4.88619497924971	4.22125640959205	2.73248682071151	2.27939452616901	3.67864710773929	4.56132101293384	3.30632751562004	3.46805696416858
GEMIN2	225.295148624378	-0.63262496729121	0.00502603810730766	0.0217831050636318	1.24817732371403	1.43186351123012	0.92335265426361	0.74387237991179	1.55413127617156	1.56655436607434	0.950397896535187	0.871660784582724
GEMIN5	1616.45800900616	-0.342408914502411	0.00457781039224136	0.020213805274262	2.2581767950975	2.13243905208178	1.80716128173028	1.65169880933233	2.00284289594174	2.19591665838319	1.73209364892466	1.82957067528542
GGH	1189.54531486586	-1.58375763327223	1.03788959732893e-14	4.21545249365579e-13	7.8781326836794	8.1348221512282	3.15086424672444	1.75476396694468	6.63721149556106	8.5358558337512	3.22846763145441	2.65687995844693
GHDC	517.1611315678	-0.428067177275988	0.0117022833599614	0.0430324585218811	1.65710854115889	1.43114549723391	1.21957615821697	1.04949973900697	2.15157090844454	1.90936985066818	1.30672598502521	1.34966663852473
GID8	2225.90244113594	-0.37359755146667	0.00112201004726231	0.00621424483588154	3.89476303764134	3.55963682074081	2.96185443540135	2.77784957220283	2.60038660006232	2.89187369521802	2.40610454487919	2.39329229979433
GINS1	625.2505475571	-0.84943372977335	5.15408752191775e-05	0.000428714844612162	1.6128545113701	1.52593293226966	1.05175445407511	0.62129625163236	0.756659116526343	1.09026975367583	0.927729461993248	0.738326066205548
GINS2	335.753761880456	-0.761760246817051	0.000943802941442232	0.00536232765879043	2.46915110176866	2.31428796285365	1.68760218812693	1.00804975076106	1.06212961289929	1.58574784208036	1.42293895238027	1.67688436165197
GINS4	434.544655363494	-0.700718108749136	0.000227696998975111	0.00156483836948089	0.919614432449101	0.934229668649478	0.641553614295211	0.474376981815079	0.590157354154495	0.753109951513225	0.547912821975582	0.506543744917582
GJC1	2482.84576925003	-1.00954425056416	2.3544624137648e-15	1.02064436365926e-13	2.83592807553054	2.75562157880502	1.52131816242031	1.21951265448588	1.52493552825532	1.96725174560402	1.32360208702013	1.16222123103567
GJD3	80.7505647129787	-1.67932638812767	3.1530987741661e-08	5.20069035617031e-07	0.212352033613919	0.217101014654293	0.0450037929033295	0.0486850846780885	0.350353733199937	0.238612168915475	0.0564038054671086	0.104810563788026
GK	1206.96855795073	-1.09933425698489	1.76056899144817e-15	7.73107000303133e-14	2.39805200069415	2.34624062771343	1.19200563986686	0.98068980862205	2.5253070737105	2.55722901127288	0.858194313381887	0.854516596453877
GLG1	18058.7983148126	-0.513788964516079	4.66181799931894e-07	6.09189260297475e-06	14.7271247972391	14.809130173988	10.137393314163	10.4786913104835	15.0975683984676	14.1452786563593	11.2498788445606	11.1025976392413
GLIPR1	12853.2442497283	-0.565855369031105	2.64732202687369e-06	2.93483855848087e-05	24.4995358635666	27.0604481816791	19.0169021361244	15.7114901447968	17.6610802083465	20.7601820466815	22.9989064852454	20.4005214866455
GLIPR2	1165.36961406728	-1.13978332912693	2.17363500948299e-17	1.14837552747099e-15	3.77718979312089	3.65072753161616	1.60633727426685	1.669838153565	5.03835133150922	5.21011016034063	2.67100784234447	2.57011124803
GLMN	635.44315965926	-0.490802731075967	0.00199314747738834	0.0101077313954546	2.30792120766519	2.49957449295431	1.78996384962947	1.60272861637001	2.34531682288397	2.33503153489687	1.89939814910488	1.7163302035935
GLO1	6003.07395382611	-0.353415796831295	0.00201079572233788	0.010178148257717	21.2290158549907	21.9295672167326	18.4349129253061	15.4072478315887	19.0652156563276	20.9928029280454	18.4184062943504	18.4593403251934
GLT8D2	2074.26930731536	-0.834105391916907	1.4112049984967e-12	4.46991747181917e-11	7.62146744416986	7.8449341511215	4.33537002737502	4.2422191524961	8.31134792068463	9.23861396121625	5.74607843426687	5.48507989421946
GM2A	2509.00416575205	-0.876417249846977	1.19608149329128e-13	4.27963021078426e-12	5.6464873602294	5.93629401497957	3.3087928280667	2.94382431298835	6.28485709054827	6.28518166678735	4.8308987631789	4.34607443305855
GMDS	528.976774271636	-0.445355039352207	0.00665226849776607	0.0272394585020545	2.26207526800809	2.30869789531052	1.64294272798036	1.66469284540439	2.87920867638139	2.57656442916871	2.16704061556966	2.26735006592019
GMNC	49.9937373342032	-1.35232587730876	9.04654101530844e-05	0.000696382852772035	0.184473266225383	0.109209928822636	0.0426548780502211	0.0267259537692859	0.0811222369430208	0.0579554866372793	0.0461222508612665	0.036522099912684
GMNN	589.378300933728	-0.794951219299596	3.52509141374849e-05	0.000303480976263198	3.7426977689108	3.5679213710031	2.45920191797731	1.63937729131403	2.59403636000632	3.34174900172213	2.35710131399604	2.15066454409922
GMPS	2464.77566090843	-0.353490035013243	0.00239516656189956	0.0117584855715759	7.22760499288129	7.53361749225921	6.08299099067648	5.48037391435693	7.07184108841917	7.28452585535867	6.17459072575463	6.2702080949605
GNAQ	3620.44301502742	-1.1391751540718	5.17240037808585e-22	4.34513758469634e-20	4.96465537194201	5.37332133288416	2.2822137851079	2.3281316247626	5.17026990608342	5.49361497315062	2.75252526983637	2.47476466717815
GNE	1530.22922095667	-0.578506789817583	7.21856698158279e-06	7.30132307278425e-05	2.17160252569507	2.22565727355114	1.57886772953587	1.35337287446524	1.9846233353234	2.06729290021222	1.58138681028268	1.61548377251898
GNG12	17090.1599458111	-0.365923346908321	0.000389467710931824	0.00248352229625315	28.1418416110121	29.0810807044331	23.7070136116066	20.7661842815245	32.0391805625911	35.084508607821	31.1847659826274	27.8040849706055
GNG2	1164.06829130251	-0.719740404743858	7.85556977861303e-05	0.000618072025920542	2.24160079031152	2.70063844676056	1.2471893252215	1.64342951565212	2.01276406218683	2.07593608313769	1.39008963871701	1.19719932229474
GNPAT	2989.18874200367	-0.5087567121324	6.35180418522452e-06	6.48853108800315e-05	8.56699765960466	8.6268508774663	6.41939811409505	5.64798434183675	8.10023060318451	8.22168958086226	6.92855086031691	6.56841790340089
GNPTAB	3247.35764217908	-2.03097313063542	4.53873422783269e-78	8.76948291877673e-75	6.12154099156947	6.08427717348264	1.48266234723198	1.42035152512786	5.43616209830814	5.65349829673865	1.51547006852205	1.38938630975822
GOLM1	541.183828305923	-0.527148544306361	0.00110005732088886	0.00612094288335877	1.27516329952717	1.3059137869363	0.919612441777153	0.848741511461857	1.6952489271842	1.52726181742077	1.17351721378959	1.18240270485319
GOLT1B	2292.65117273688	-0.579987737910324	4.20135374569712e-07	5.54915130962437e-06	5.44951787086728	5.57821085952167	3.79894662555408	3.5465838904648	6.43132000204044	6.36942907091786	3.5456980118376	3.21181954542641
GOSR1	1668.87215427952	-0.586303353578947	8.05798936123551e-07	9.97599512312867e-06	2.56263370591303	2.46746456636205	1.70852169074276	1.61941061080185	2.03716498313518	2.08729089079155	1.39852573285248	1.397611568001
GPC6	516.192212074855	-0.750404555074667	7.028411235326e-06	7.13122745369724e-05	0.581656380913356	0.62321932966704	0.364898572443474	0.335401876381367	0.786504188531209	0.670779749002692	0.532751494370167	0.495729653086859
GPD1L	478.615717624172	-0.439514531049782	0.00903263670203976	0.0349646283328814	0.881863470430281	0.904512012160063	0.684998277935014	0.619202253494048	1.11419308098604	1.22919797131888	0.873479995698651	0.839037252499223
GPI	10066.3383775511	-0.486140063473389	2.47965737093171e-05	0.000222987805464437	13.8398730727007	13.4964815570519	10.7930220721738	8.70146828121582	14.9520228916521	16.1398089450421	11.0281554062152	10.5019385672368
GPR161	2963.59833338258	-0.711569620736989	5.04144020017373e-11	1.26974820684078e-09	2.7043384554642	2.61530341961509	1.63264383832218	1.59172889790978	2.45152193401842	2.32504355097857	1.84530863611773	1.71866456722037
GPR173	295.619449976763	-0.610133433246118	0.00862237113625105	0.0335590128396534	0.591502057229022	0.538440144955978	0.280212924641595	0.410112306816762	0.602395056219459	0.568184629756587	0.464684562472142	0.502834828240321
GPR180	3208.5632891794	-0.441306467488151	0.000363461573267058	0.00234645240020857	2.65220080644618	2.81094420605695	2.2007660994863	1.82216724670846	2.00669545838645	2.0976175824242	2.03059038182615	1.80600817004168
GPR37	1701.34654778797	-0.474811357972198	6.92473472407313e-05	0.000553528588316129	3.49690382880872	3.31802378663239	2.55033486265949	2.3356872331088	4.64595562176543	3.69611961918337	3.45924465006048	3.50405376105904
GPR63	440.502921521367	-0.567884639487265	0.00447008294667547	0.0198977571142919	0.563807206198322	0.586167430712875	0.322616874658579	0.421095102155514	0.674783395842903	0.523759469549255	0.328214003426139	0.268495025054542
GPR85	214.397113296341	-1.22092028058987	8.24888266484952e-08	1.25637542840191e-06	0.383049977326467	0.381079764428373	0.135180333483873	0.157202321597021	0.269336175227695	0.348530063068901	0.164419109632715	0.144460918796516
GPRC5B	3905.60622630458	-0.51444584591377	2.12652488080336e-05	0.000194991518731291	9.61566930938112	8.37544892059659	6.82449962303447	5.7191293349112	9.7287807441335	9.10347072296843	10.2937314398051	9.99073731488191
GPSM2	1516.98785164984	-0.564922038046076	0.00112725585263157	0.00623793272516211	1.93926616375157	2.00415367398158	1.59307964891693	1.04405648914669	1.0807593631916	1.45977252453661	1.31477494072782	1.25121964288048
GPX1	4412.05595896459	-1.81039788585579	1.27284152099967e-30	1.97875650247363e-28	37.707359933112	26.2144458322671	9.2837789370153	7.8504078367513	36.3344976546376	33.2270410726418	11.0669827820573	11.5094264348892
GPX4	4592.91453986913	-0.820171206169881	5.97467676947949e-10	1.30968400822059e-08	31.1005901402096	24.1330746291191	15.3084138511405	15.3816626550033	36.2396833190319	30.0082717086482	19.6086121109302	21.0986739466783
GRAMD1B	582.717867374331	-0.538091576813283	0.00069073804748831	0.00408314339697526	0.57044743421597	0.514597808966308	0.384471272799166	0.35184291591552	0.356601401186478	0.469610378945903	0.440689327591271	0.459525967834203
GREM1	2181.03320533264	-2.18302086935658	2.18192975177802e-75	3.27895554364419e-72	2.95508279159795	2.74180789887047	0.639455717648685	0.570891851943464	2.20615504746877	2.72816559740832	1.05573120902398	0.940374347137956
GRK3	1920.08994310862	-0.659335361511981	2.50646776331396e-08	4.22166581554438e-07	1.6837659518063	1.72938354609677	1.10260982429788	1.0435562598971	1.40461683310877	1.44546994216791	1.12348718791891	1.14377294854104
GRPR	893.296285834694	-0.656531560013628	3.23533805458963e-06	3.49783750506193e-05	2.73550396570994	2.635067347874	1.79418338395609	1.57714279273673	2.09500139707076	3.00186270815606	2.47679818324158	2.06605832525075
GSG2	173.037245146166	-1.00489078756735	5.49728270506641e-05	0.000452509457120152	0.546010616822115	0.568563450612954	0.299197963076835	0.210008071276143	0.30990270412929	0.351690083366994	0.317925012081933	0.307694773084114
GSPT1	7560.93261256604	-0.67694200500292	1.74257752426724e-11	4.70426367579129e-10	7.79481062464469	7.91485683687624	5.10561054726703	4.68879854461378	6.65175760964076	6.95198271458232	4.78001355661023	4.63433595584601
GSR	2861.65607441894	-0.683715617345122	7.7654586933451e-10	1.66183273461222e-08	7.23094774926225	7.43333924520866	4.68175240867201	4.39639825109676	9.5898320022607	9.47736269231977	6.00834933495329	5.7465998605903
GSTA4	656.316051351375	-0.79935445941985	2.76579389580161e-06	3.04620215315283e-05	3.7129456440793	4.50081724557181	2.40039357946732	2.20514529179051	4.37305498458697	3.85148802837989	2.9631177687751	2.89189667371253
GSTM1	386.510023484244	-1.26371790781138	1.63862617774687e-11	4.44136654389308e-10	3.15761910448133	2.97806720672967	1.34285051672625	1.07786786461167	3.41450575248564	3.16617025870294	1.80803469383148	1.66422425505919
GSTM2	674.67263474827	-0.712481927633633	1.97690535368259e-05	0.000181888740874538	2.72444007926596	2.75553210497915	1.86546519892604	1.4293650614203	3.51554518265795	3.15074410442272	2.11964550633508	2.21358673950465
GSTM4	436.764388109652	-0.509512483460764	0.00535596645222927	0.0228804315433989	1.65520515686552	1.88219352967413	1.1858393787321	1.24415797617363	2.47793989817486	2.32072600524615	1.66853754986574	1.67430108738993
GSTM5	162.5938027685	-1.17300933933902	1.32074824183891e-05	0.000126778708097028	0.934253010454566	1.04196010561785	0.289586508156616	0.441476157032549	2.68560019680559	1.97017780769583	0.759759259641953	0.817741448287005
GTDC1	988.166145904893	-0.449765368552028	0.00333265256485185	0.0155053752802275	1.53660190322523	1.74552155064003	1.30668537340925	1.08868889859764	1.90150111867557	1.90727853648344	1.63102754534308	1.70192825583907
GTF3C2	1618.07724359836	-0.795219477130273	4.34939961195304e-11	1.09954448133953e-09	3.1210069306301	3.07292315121533	1.78568171796354	1.74084619696902	2.7549313600696	2.88111834707837	1.76882540741573	1.71965864063663
GTSE1	510.846489977595	-0.824154192438952	1.33218090990086e-05	0.000127764436103354	1.46208316992076	1.32264734362263	0.894107649412604	0.633159057231982	0.805471043201262	1.0890525337198	0.729974352933624	0.667734773236503
H2AFZ	4500.52348508095	-2.5104073710271	3.86222734097491e-17	1.9786600297987e-15	54.3367896947416	57.9107385777997	7.84476701472881	4.35309907927577	40.7902246568323	47.4418929104777	6.46637764806139	6.56888725863531
H6PD	8897.70119116761	-0.57400984161292	6.48420328164924e-08	1.00803275154375e-06	8.06838640394505	6.99745279356765	5.18272568413815	4.88672629185253	9.30461900796693	8.98267054073767	6.41420007897937	6.53730806618349
HACD1	740.294044625252	-0.421872347895488	0.0050210101667785	0.0217727356542736	4.43554886844954	4.11825878800609	3.08898183788544	3.20966026810947	5.45757664640498	5.06194837992751	3.95284083057787	3.75700913703162
HACD2	1761.14898491942	-0.380534519960788	0.00351592477932593	0.0162351938000625	2.64733168156033	2.92855107317938	2.26306447625043	2.01888624891384	2.84359709636329	3.22371729323059	2.54117985028589	2.16685423893481
HACD4	801.964271916842	-0.631821733981527	1.76528103828939e-05	0.000164431308835152	1.41186386734251	1.49874654428322	0.971158889735023	0.886051726826252	2.22621724608446	1.92019394279215	1.37135684960316	1.42710478083302
HAUS1	871.225992593062	-0.66201043761962	5.9446716397187e-06	6.10955045039479e-05	5.77272401157813	6.29619143981681	3.89477696283498	3.63725319323629	4.74815214540948	5.83464091706329	3.99770322884564	3.8002671358758
HAUS4	715.834031374955	-0.577310186053886	0.000242465214189264	0.00165206147199486	3.35648356529836	3.53170775194022	2.50363270855256	2.07324383676738	3.02753130362519	3.00160400822379	2.53716920039163	2.40794351922484
HAUS6	1533.75752358706	-0.583220793405844	3.1218172692755e-06	3.38051069391122e-05	1.8952858337038	1.90271320201554	1.34002346300682	1.18310527725948	1.43912263708151	1.75338048344942	1.31659774294591	1.22478769928077
HBBP1	24.0284416543786	-1.08418039735527	0.00269645876186027	0.0129692762283642	0.393672208837915	0.390371636319577	0.068991019393913	0.101043571799963	0.422631240337604	0.4056324417201	0.322811218057279	0.190801647313184
HBD	585.777178162403	-0.547446737019727	0.00759540485040862	0.0303928552076262	5.58205047581359	6.29799831906415	4.88720258933459	3.10883441883132	5.76739056559329	5.18046083514624	6.87120777453962	6.01074491787774
HBE1	399.832413790541	-0.651769455501878	0.000888621577949505	0.00509911193965509	4.05970754276159	3.87208085382963	2.8638544160812	2.07344763944086	2.18063102866185	2.00062649794277	3.39843296285923	2.94394979781463
HBG2	31.5886325547234	-1.00977972521799	0.0045246142203026	0.0200312298951204	0.513451614244992	0.577033044159945	0.155969405765313	0.171323448926696	0.70331814995576	0.262006154465617	0.417020519872084	0.317836236907364
HCFC1R1	1045.49848771299	-0.747175248412332	4.70354585480148e-08	7.50182284035259e-07	8.1110952051085	7.35807028406935	4.81107669334429	4.28129681083901	6.35127142220568	6.10246228011228	7.24389983454503	7.28728696520981
HDAC1	3154.47564213909	-0.379645603223301	0.000967916172641761	0.00547972634364999	10.9801787315832	11.3881251650898	9.18868654255225	8.02202317223699	11.8433932941618	12.3182206052194	10.4244347963308	9.74156014531847
HDAC3	2116.31422889456	-0.71330815625512	1.24577987278461e-09	2.55677887396234e-08	8.94179286025226	8.82782316781975	5.72228895624067	5.0497109449285	8.59169112748013	8.57989331354238	6.39838389353994	6.49531557762285
HDGF	8061.33262409184	-0.348192824454475	0.00121288929101961	0.00661464825041943	18.603848101578	19.58450129973	15.9765969858216	14.0748561677507	15.8948994089873	16.9156983704727	14.4449872791558	14.2990703323582
HDGFRP3	2071.38287639025	-0.894128452500906	1.11059380175381e-11	3.05300430258542e-10	6.80099782173259	7.76431443839025	4.04590662024466	3.68577694313784	6.16631442894655	6.33841758151147	4.20146246293372	3.63245144518581
HEATR5A	3362.12237345853	-0.498509153201681	3.26801883450885e-05	0.000284793522788223	3.15512296289676	3.43649099296508	2.29093463211636	2.34943726144262	3.58761305945175	3.69433730509878	2.8664129150587	2.68154822316445
HECA	1553.50503160272	-0.550345446523728	1.72117097958129e-05	0.000160654503097564	2.19407621304377	2.12287315049012	1.5901859238683	1.34616361162232	1.96681337825202	1.65936162969473	1.50708339174662	1.31626141890613
HECTD2	1000.40211439829	-0.387388120759749	0.00569383601928906	0.0239787763430863	1.11729626539906	1.19923032198089	0.889503466251641	0.872239740572414	1.24169014592501	1.20263575353128	0.827109613918145	0.82542444982131
HECW1	787.889272441417	-0.54717785172496	0.00325037620614868	0.0151813997781992	0.914790741934633	0.900851767894232	0.506571023787228	0.693059590291851	0.777156785965152	0.744037235272805	0.55323894034463	0.646394708113924
HECW2	647.843937036592	-1.00405094830241	1.18977924984809e-06	1.4177765950833e-05	0.818530225642265	0.784338740845724	0.293849720664487	0.444330515540262	0.761790394987298	0.847759158941888	0.387171891738545	0.338156009742575
HEG1	16220.0480445588	-1.50517589177998	4.53679509792617e-47	2.1158673689466e-44	17.5891385555263	16.9092705176413	5.79188197781549	6.12317915235426	22.7194192416028	20.8850361014	8.00668097016733	7.58488864862904
HELLS	1179.01060167109	-0.743359017824756	6.68904434623368e-06	6.81244915533212e-05	2.78527296166479	3.0359446322075	1.99470233275266	1.43104063545604	1.49365773269146	2.08284517481736	1.91642801894145	1.80971043673735
HERC4	11370.7843740129	-0.69092912972851	3.3220432362845e-09	6.3461348546254e-08	14.4359839160776	15.7318304428028	10.1116126282258	8.48469925099892	11.7951571925451	14.1290246513059	10.1098300829216	9.75300967974737
HGF	32339.1839527696	-0.63419035761701	6.1821627051516e-07	7.85105639316201e-06	32.0672333814149	37.1683486119239	21.0993055656822	23.0676491236284	44.344463702287	38.2449389657345	26.1244839452561	25.1531527477992
HIF1A	9036.41865564219	-0.495558843046745	8.34235455353169e-07	1.02853550899285e-05	15.5925889670684	15.9631469621471	11.6833363738332	10.6854376623413	16.1753572876856	16.7585761068317	12.2443113448099	11.574758412655
HIF1A-AS2	1396.99004063119	-0.961127550635346	1.43326039201846e-08	2.50774214774252e-07	5.92554705941302	5.99164752937732	3.56893133431242	2.39510348662855	5.36387250200292	6.79124966388318	4.99714890910285	3.39118114767988
HIKESHI	1554.75386577388	-0.370288733836971	0.00328626452285994	0.0153091195132719	7.39932676280771	7.53432207393546	6.15845198664337	5.39698530517174	7.84199737200672	7.96603979905395	6.71449579462791	5.89586219463161
HIP1	2402.73042149685	-0.396313335945178	0.0085037136982508	0.0332406727655613	2.28478092008289	2.19055557230956	1.48044258832812	1.87061482334112	2.71835964053175	2.56482517253935	1.89939814910488	1.8421202089989
HIPK3	8522.25139743464	-0.567512664679437	6.02543664318785e-08	9.43217946749024e-07	8.12832574021868	8.33946023567116	5.47620829729955	5.58709143636503	6.78767465860176	6.49086903505837	5.43902598299083	5.19929568712347
HIST1H1B	4220.83695177847	-0.596146215073222	8.05476228637171e-05	0.000630803980287795	46.4422617887114	38.4671652936549	32.3550240215784	23.186930035414	22.0832996324717	36.5438887874721	25.0624383623662	23.7487035055007
HIST1H1D	3004.51750269395	-0.641564668120706	1.67260859891773e-05	0.000156445582990057	31.8219732886216	30.3072310581304	23.1128794122684	16.3333499491766	19.3362706812805	26.9818287777821	19.253101444466	18.712119042059
HIST1H2AE	2280.12667316395	-0.38763959684392	0.00666984063352038	0.0272948848920917	31.6326250883828	28.6189652979982	26.295584533383	19.6843757477219	23.0448925730185	29.1652859282028	22.5233596120806	24.2300820941991
HIST1H2AH	1197.43844123453	-0.626658666483411	0.00269242408697742	0.0129544773306189	23.5864300059731	16.7032612800013	15.7851739238218	9.47657314374983	13.3016324535292	15.8386397176009	12.5415561778734	13.2631258670019
HIST1H2AI	977.81152072843	-0.541947732659093	0.0055392581703606	0.0235222815554559	18.6796397718579	14.1208205110677	13.3777852574013	8.68647633229042	9.996415325384	12.8444816180344	10.5945107847726	11.0484881167839
HIST1H2AJ	569.617756829394	-0.603929909791428	0.00472802821686472	0.0207551384722802	12.0691538782585	8.79003103648979	8.07807831181302	5.21229153499988	5.42788585888409	7.35042152079552	7.28607399337727	6.48213197447992
HIST1H2AK	402.643720774733	-0.55423660409551	0.0127530813192192	0.0460329396430316	8.32952462204745	5.57815826879375	5.29767039878163	3.82945152579193	5.90328560212867	6.14318995432372	5.45044686264879	5.43810891865089
HIST1H2AM	1169.95966862035	-0.58254347942519	0.00518782047964854	0.0223339533406109	22.0460167849964	16.3078455028094	15.6840528524413	9.21687321162859	14.0909141460336	16.2512074558924	13.3074876483488	13.8742882931542
HIST1H2BB	923.118591880891	-0.844454718771704	3.65291171927322e-05	0.000313686546051875	19.5394349336796	17.1411444663426	12.4264191038361	7.21214744665814	10.8957199240246	16.568545803942	10.3827889542717	10.0111566977361
HIST1H2BC	1997.2321882822	-0.332152945893972	0.00964550821916308	0.0368935233778791	35.9711931243932	30.8278186020916	28.4208661906967	24.5384985223371	35.3971353827049	39.473388122832	25.3773469601867	28.2843151411458
HIST1H2BF	435.187882900103	-0.597098959106685	0.00615761057660183	0.025554367305474	9.2587266783587	6.97978433465972	6.28052525062085	4.1107003032396	5.36157417570926	8.12592285284367	5.51267183740208	4.92487777055132
HIST1H2BG	2412.88732014925	-0.49323981095173	0.000355513421867786	0.00230614821619271	42.0023079635832	41.5238778468013	33.6482564709492	25.529380450612	28.9770245881548	33.8870144668137	28.4567488464993	29.8546450943
HIST1H2BH	1685.69216660323	-0.614498737786912	0.000319393322394329	0.00209800616094381	35.1932623032267	28.3096804103959	24.1767258409718	16.6220025718668	19.6416073454704	29.40429570029	19.9325076353124	18.4675673928365
HIST1H2BI	1504.74522997488	-0.673764497603754	0.00020692554855773	0.00144186916241282	31.0073860656262	25.132278494227	20.8910490195474	13.533637694696	17.0132177647193	22.392495388271	17.3857954151477	15.1891485530684
HIST1H2BJ	1873.13659518813	-0.601664470015495	0.0024486780045019	0.0119886148738603	35.2033172560566	27.2079395562583	25.2940870779325	14.8063589689531	20.5395219385209	26.61605997657	21.2448275305286	20.211132674923
HIST1H2BK	2826.42831507754	-0.421475504652066	0.0036862362838386	0.0169119218924413	27.2456606184103	20.8597120191529	19.5289697389	16.1163150739878	20.2265419247142	22.1288862061656	17.3194275422326	18.9058811878105
HIST1H2BL	561.467260927946	-0.647052699917319	0.00810295397286085	0.0319791224052941	12.5111421153454	7.84855355138677	7.86857044502903	4.43650832570146	7.22414867934691	8.51418785507667	7.06089731367025	5.88736250592466
HIST1H2BM	616.896682614286	-0.558631582760247	0.00929344579543302	0.0357796340402026	11.7902382221409	10.1014776585336	9.1541801432665	5.34764762404673	4.6488383544161	7.25646165220308	6.71177462553653	6.15782257675787
HIST1H2BN	713.511050279154	-0.594579133945348	0.00154824773301861	0.00813521778907407	14.5782140285649	10.797918886753	9.4170436650217	6.99717017019543	10.7173781336243	11.8219335965647	8.24059597874457	8.65178450768972
HIST1H2BO	1066.75000148368	-0.778734430358519	0.000287596093249468	0.00191707105036918	22.5414787377299	16.0881425681168	13.6103178435253	7.90056678430195	12.1265904570531	14.2896094819814	11.6810952553088	11.4217353969331
HIST1H3B	2039.78348982619	-0.699396052247465	0.000260878452727072	0.00176507307310338	40.8001851576499	30.3680419280252	26.2580112148061	16.3070643523243	20.3738751363244	29.7125456634699	22.1328174154171	21.7742593114173
HIST1H4D	1423.15485530355	-0.490486623981697	0.0090461849516669	0.0349970398945351	33.7949562073846	26.2053836618353	25.6190161096069	16.4283782414939	24.7694471067526	35.7161417570493	22.6892683533401	20.5386357772728
HIST2H2BE	2950.16518078842	-0.619977839320565	1.60728059155946e-07	2.30769320603415e-06	10.2069931020001	10.9077481693484	7.27277691460968	6.41287637660385	8.72835857893815	10.4830674887113	6.34670690578096	8.96961087318458
HIST2H2BF	1054.39854570212	-0.434792977172431	0.00525584329678357	0.02254528404345	8.07036542403838	6.89301955622234	6.19552285932295	4.80813559335511	3.8138695554302	4.33947693333678	4.95588045652108	5.34014027937914
HJURP	745.710175765339	-0.577377216067659	0.00228337915153045	0.0112957948150875	1.91176063410736	1.79127570428608	1.47986061110853	0.963347437546943	1.10382795250191	1.5627015711019	1.07924410353655	1.03552350190812
HLTF	4176.35317894408	-0.735787088113642	1.10895442564497e-11	3.05300430258542e-10	6.31107791140088	6.37534583229717	4.02488806880711	3.55767746248863	5.77803711795631	6.80681165305747	4.68874376555498	4.34614881297722
HMGA2	7379.61019607137	-1.40608387816408	1.33238331024536e-21	1.05382948953617e-19	11.6155549754012	11.7964176523048	5.04567078965027	3.50143418366386	7.26518243460987	9.59413429174281	4.05781939069129	4.08081555606836
HMGB1	6254.37700368521	-0.661593331434549	5.82720508975608e-08	9.16429637662221e-07	8.81052802649395	9.9540281903271	5.76043517995161	5.99590573109729	7.53901493701413	8.87268195931889	5.89177946456085	5.16896524716147
HMGB2	2466.90994430992	-0.485615350865481	0.000506984317590624	0.00310410271408474	11.3543627660453	11.5285251396631	9.29104938020741	7.0110640763938	7.67097575653502	11.1524294665465	8.77882750100502	7.87090360267066
HMGB3	734.262060116728	-0.78179167263678	3.27757988889438e-07	4.41526573678252e-06	1.53430446355988	1.60062981247582	0.868655968630404	0.909947047040972	0.926799064015776	1.15586374101752	0.737441937838933	0.699813809637249
HMGCS1	2625.25417158243	-0.343067342411035	0.00285105501870118	0.0135542216453784	3.32891966613273	3.37620233211091	2.61269926974423	2.65956845123779	3.60704534650997	3.61869782000984	3.1561875265669	2.87355068533327
HMGN3	818.142360827785	-0.489482456795707	0.000808892749780758	0.00469338242847909	4.18807695264581	4.37059620997561	3.00626255038994	3.02259628578064	3.65246990255937	3.5589614903611	3.55588007233785	3.11081830774642
HMGN4	3122.90586207619	-0.744932152186269	8.79822914652482e-10	1.85641262413024e-08	12.7362438220754	13.3903137220754	8.42767369591399	7.06540921266425	11.8091691804564	11.094331423979	8.84069463709386	8.38322491306737
HMMR	816.305531730258	-0.87827086431975	2.66834293928963e-06	2.9533010027735e-05	2.21982030004537	2.24424665825857	1.42964674726994	0.9286290741102	1.08340542513873	1.57696205044046	1.2211280271139	1.04680103073731
HNRNPA1	15848.9132394313	-0.501741620529069	0.000280717320174692	0.00187862531190634	54.0145914222556	59.802990615313	35.9864808539179	43.5065493537146	54.9630352546508	62.7307182298976	40.1157137511788	37.5173390483847
HNRNPC	13764.1426038962	-0.394899139906748	0.000128876274141984	0.000948341462334239	30.8669890171647	32.16801961143	25.4084377700006	22.5830857659019	28.7882479270483	30.8305691447067	24.8440343389684	23.9050890253945
HOXA2	67.4304453390932	-0.962447807966626	0.00276694985667461	0.0132517694091799	0.286210289582796	0.419223625534452	0.148311290397871	0.13788743274134	0.313289074670957	0.375860206824446	0.149558909378337	0.193546588423663
HOXB7	491.134557294212	-0.493334192162085	0.00284390978803305	0.0135293281333616	2.82687815172204	2.71867164831589	2.03028549679056	1.85679835544907	3.28489736216526	3.2777981697049	2.28039016437189	2.0880481268674
HP1BP3	10331.0083825394	-0.493029870234754	2.19344733330746e-06	2.50138070682828e-05	19.8874437217058	20.5240021297689	15.2617038101532	13.4415137682997	19.2554195561339	19.7535291997845	15.6350356185945	14.7917466652943
HPRT1	506.225993837625	-0.705101609555899	9.77560538241528e-05	0.000744035243653161	2.86296749560804	2.99746137644557	2.00496191032419	1.52298272525272	2.55878574980371	3.06308802898712	2.05645085825348	1.93155707436442
HPSE	25.3161846536635	-1.07495457218261	0.00290649417886334	0.0137834269877723	0.0528499807741579	0.0600932260885911	0.0173383786451397	0.0102600483538021	0.0835935343485553	0.0687696768249134	0.0370221673130613	0.0364540078619993
HR	33.9960713481392	-1.13589041366997	0.00145395796639784	0.00772682966425571	0.075975200788028	0.052617169477708	0.0214302415934609	0.0120717392705177	0.157086287299764	0.105576106681254	0.0440759541489168	0.0227951931797296
HRH1	4074.19237404077	-0.376658999042222	0.00209588319762273	0.010541770266957	6.24199298042036	6.29234153285131	5.35804762038569	4.30700560326523	8.16523468613022	6.88768119647427	6.59940328269318	6.26342642985745
HS2ST1	2541.62368569851	-0.448851568150493	0.000233720610780978	0.00160054241053809	2.53812596449519	2.76290146315207	1.9274941759699	1.93934685487267	2.00414209778171	2.10385487331023	1.69939270050678	1.46384195983683
HS3ST5	113.830463722386	-0.763631585049988	0.00467091861195361	0.0205377679540548	0.359996195570678	0.348564342794696	0.20545445119508	0.174278736796909	0.267845286699624	0.351396419310289	0.199353741597014	0.212232797510092
HSD17B12	2013.91973219618	-1.66597351259121	1.78165296082539e-42	5.47655824890078e-40	7.7001736703325	8.16435405021403	2.50817189862265	2.35239324751555	8.90381433140457	8.75534230149222	2.95544859349915	2.67572527889961
HSDL2	2435.71533431236	-0.399429937423915	0.000949932790891066	0.00539145656600993	5.19463448147131	5.57740578325832	4.32140682444611	3.84598201514877	4.78227149992154	5.10882386667073	4.51170411225269	4.23594424088972
HSP90B1	45999.1870637265	-0.336715285349957	0.00200372328389683	0.0101461465423829	115.671774217052	119.560450553293	89.5830500269376	96.3525191868045	144.187593048582	138.422642720436	101.126028081064	94.3626778515072
HSPB11	766.482014685323	-0.877689411992658	3.8797530532637e-08	6.28427066411874e-07	6.32930074144023	7.05444826029511	3.90098760936614	3.24003733305563	7.72069474726716	7.83056174712233	4.28383157632643	4.3330058091709
HTR1B	166.950976473972	-1.26240146432353	1.48345290679633e-07	2.15506987802582e-06	0.524831103564374	0.481995871056955	0.194748066839687	0.177313024621456	0.153511646588769	0.153350964384374	0.172291863603844	0.143820003397891
HYLS1	294.129177683219	-0.6753410168438	0.00105427532745345	0.00590437838666994	0.994637477724549	0.914257988725034	0.653628260705841	0.504853054422591	0.663655251904243	0.754496823437189	0.59139322831542	0.56769093443309
IARS	18978.3523595571	-0.647040449603842	1.88933820177958e-07	2.6876027146152e-06	30.5994342018271	34.0443658702478	19.348239898304	21.5128053988044	40.8818980417703	41.0088862194466	25.0865732610438	23.2241381421579
IBTK	6180.72072149616	-0.379529320303766	0.000275250753039323	0.00184844410866775	7.44150092267214	7.70619916130096	5.87213469476892	5.76426475274213	6.3643898769633	6.46503163486574	5.54812629603	5.06344083468455
ICAM1	2122.49092115573	-0.469627216001818	0.000174443006123458	0.00124241266867813	5.36406138814879	4.63527849590996	3.53243796212707	3.62161374085625	7.98437271283726	5.63811152762001	4.12179931062686	4.02246712469004
ICK	2133.72646579294	-0.47727070262738	0.000148558394610928	0.00107582056630568	2.49371931084979	2.73452698084231	1.86145910336043	1.87337989335345	2.39610729766909	2.49919923544497	2.31289328961216	2.21300740553318
ICMT	5482.13042393642	-1.00794572942881	9.37306219003656e-17	4.71266416803883e-15	10.1397149904876	9.89099469167304	5.48602544434517	4.35620557675916	8.57200947666745	9.73719141913962	5.62048283041461	4.9836259879856
IDE	4176.23276091842	-0.378275722323866	0.000440972013500489	0.00276641189419288	4.47181449475288	4.65659798379989	3.58035004731372	3.4395900488494	4.83288785066193	4.75160245244442	4.00999615139146	3.89592620272525
IDH1	4724.19195320642	-0.762919110344181	1.21032565903441e-09	2.49537416744518e-08	13.429679918559	14.7010937023009	7.80475729667494	8.54793737230304	12.9470224267656	14.0542254020776	9.04553365219168	8.13602071189706
IDH2	1201.29944652792	-0.589126519750599	1.22561446692618e-05	0.000118742375825047	5.29833165747094	4.9605445729044	3.26956437171457	3.44931210505748	5.78047898340998	5.49651482618227	3.91552480979896	4.06700654165138
IDI1	2455.34368799924	-0.522396841150544	3.38528287798376e-06	3.65119225875042e-05	4.73045625016231	4.60816002685415	3.40401791371246	3.08024495143494	4.23217507233266	4.3923479861232	3.79226434682498	3.76325655297786
IDS	6539.24542030302	-0.325255556571632	0.00121862995550846	0.00663057143548501	6.03410311791699	5.97561955016763	5.02813223370158	4.57304920029445	4.68633666891419	4.53592585761456	5.05485377179594	4.79309433165706
IFI30	58.2791685071337	-1.60345638137309	5.53225089099207e-06	5.72046584867491e-05	0.795916597619847	0.487662701622012	0.159216239698559	0.0500526677960288	1.18907290332987	0.622216828768328	0.206938319746835	0.231751908706634
IFIT2	1137.51831422017	-0.632800555275896	0.00488180313196786	0.0213125846868513	3.00627021967941	2.28369054022132	2.15942877698933	1.12321842657797	4.35191940227275	2.8654205627338	3.08468780953342	2.88002307606731
IFIT5	2878.12207215932	-0.492166821163254	0.00669397854301963	0.0273853780382155	5.70635155824528	5.31430565887046	4.84404862402008	2.89991339409924	5.42360461299548	5.09054852353404	4.82336009901597	4.28992532930747
IFNAR1	3899.0175211635	-0.482274794330541	0.000495482162151843	0.00304470524448145	4.80729114256526	5.00620177495953	3.14987816340081	3.78960122040622	5.93123176280381	5.22147170354206	3.67661643696114	3.59668009810283
IFT57	2436.26104028061	-0.588069934773941	9.85880698944641e-07	1.19480613380164e-05	5.79432471073977	6.20087361204227	4.1959032701661	3.75339027726634	5.93461743329826	5.993978722594	4.44280079085038	4.7913483125787
IFT80	2744.59824363139	-0.540879217712749	2.54138625553861e-06	2.82666522254603e-05	4.32896927662035	4.58243220456042	3.15181556083296	2.95281493863467	4.26056397643275	4.34309920122771	3.55621873826565	3.35999965748453
IFT81	747.979488575156	-0.638276602266927	9.48777797764366e-05	0.000724165898124325	1.55714809859349	1.67786110038684	0.945204762239474	1.08044675190704	1.58553565204907	1.60011655495158	1.01831821262781	0.854999722403916
IGF2BP3	5796.85232832699	-0.433767966150051	9.16913170093946e-05	0.000703605759511684	10.0932357031179	10.9102688296233	8.14195549655745	7.40340567719465	10.3128526224819	11.2776317339899	9.18141389507202	8.63862963529314
IGFBP5	181707.224968572	-2.2497420480256	6.5725305859658e-131	4.44467380875937e-127	322.111624857352	310.659505265394	65.4918709694673	64.6661213813022	371.711589667803	360.899669329735	112.313826761945	103.993616187554
IGSF8	531.751848034833	-0.81918266464108	4.73890959607944e-06	4.96465935607858e-05	2.13132044285458	1.64012628357479	1.03562514193581	1.01648101077145	3.02746627920047	2.38173377284016	1.55945580201853	1.38595655448374
IKBKE	1504.07929755421	-0.710740490755231	2.38031210124628e-08	4.01417969692717e-07	3.73675226182483	3.35130502937994	2.12275079585823	2.14414041583724	3.03758938455274	2.66289491263309	2.07545059700695	1.88780779033988
IL12A	385.875404472985	-1.53019252151613	4.94327101689986e-14	1.85715945843252e-12	2.87656255716353	2.44560612610856	0.989330261892227	0.708960097960922	2.88979439437817	3.30137060112066	1.721699777567	1.96286925002656
IL15	360.83395055647	-0.742559328916436	0.000555759290983844	0.00337248386906479	1.0968429734542	1.04188836257343	0.747238270460048	0.486686178404829	1.49720946614559	1.34491366215689	0.943279906136754	0.831051223754875
IL1B	50.7116714195726	-1.13231255904407	0.000715549090191752	0.00420408403338117	0.353029404284735	0.317044151177489	0.127472191908192	0.0909226581420048	0.361518675210905	0.178445780436279	0.0963646591001142	0.114861760419651
IL6	2447.70580821699	-1.57928389403864	1.85156845878685e-17	9.82057388434986e-16	17.4972996062117	23.6112417215946	5.44510315017311	7.21676613918718	11.4713615492784	13.1680679356426	5.07358159929109	7.50277583821059
ILK	15351.5565912723	-0.34619285994755	0.000281711003788887	0.00188364875766108	51.433195123044	51.611513268058	41.6049174720446	39.5383588899342	33.7949840591048	35.5670358276342	41.2862774258315	39.7007723091467
IMPAD1	6864.07435941569	-1.37109713797825	4.39486900682766e-37	9.90676721955735e-35	8.72771161340224	9.28588309759752	3.59444546967973	3.26533489102333	6.02227109646766	6.87425964217052	3.45517074094432	3.10753060742537
IMPDH1	2731.57174867748	-0.534451884719372	1.67037862307994e-05	0.000156345127177551	8.40931116388341	7.1437588570486	5.71181063978437	4.96115541030274	9.21308203234552	7.44200460991694	6.07807407713562	6.66135861060437
IMPDH2	6272.9717076807	-0.528686687778744	2.81653031902451e-07	3.85562475352292e-06	28.7658913687374	28.7334099803283	21.041379657888	18.7742199402685	25.7532563732174	28.0195226755358	21.2427071530878	19.3407391245709
INHBE	299.764795980709	-1.21287289209723	1.17178276519178e-09	2.42329692648605e-08	1.13792185877242	1.13239704280653	0.49819691886197	0.421332383392641	2.37997838243958	1.89852115833484	0.712274305914331	0.606990185854019
INIP	1251.01395186095	-0.542271838183639	7.11197689188635e-05	0.000566820786462951	2.16725649599598	2.30264626255742	1.64341671757357	1.41269805687988	2.27126595215071	2.410798400901	1.63627051560503	1.40248884446348
INPP4B	3025.35247828795	-1.14699234203942	5.32972034734633e-22	4.44965849986784e-20	2.54358139839948	2.72002400023153	1.24927558495257	1.09418203474549	2.11170886528499	2.2055850524844	1.49502661568228	1.33968795009271
INPP5B	1443.25377233175	-0.561340734005981	8.47182465711136e-05	0.000658513956824317	2.34123681285431	2.61225946606314	1.58675422090137	1.72482339229225	2.74406351006137	2.72021530223119	1.81092847804445	1.83498274902649
INSIG1	6296.16510707565	-1.19703363109899	2.66907134742948e-32	4.74989341762943e-30	19.2533800780939	18.1959692235769	8.10432421742917	8.01524235086274	14.4836514048663	15.2142258467718	9.92051769405899	9.34998474738341
INVS	1382.39217039352	-0.445923514786157	0.000753203712175716	0.00441190134568062	2.09472477814421	2.05693249081881	1.45732949118626	1.56006938240762	2.1721592803046	2.02308578360272	1.76335103197469	1.65248699728395
IPMK	1022.26727047192	-1.23092240831651	2.6418110293071e-14	1.02379639459537e-12	1.50655449515231	1.58749532667692	0.735388245986368	0.541877101301165	2.43460693356608	1.86173678574853	0.982372563013319	0.823314012178065
IPO5	13080.2317846237	-0.346305095722089	0.00167183520416926	0.00868006569535096	15.5755743938751	16.4049761904604	13.6243745569088	11.577862845003	14.4895022592768	17.1722400098415	15.3989859939093	14.2621295004243
IPO7	11624.1241422844	-0.360574233384535	0.000594589784409025	0.00358080205722769	13.3798398096652	14.282351736078	11.2781598215414	10.2923926922818	12.8904177784285	13.7467228589773	11.0393314906309	9.84761800734806
IPPK	766.317233660858	-0.420384084712443	0.00382936034103837	0.0174737174806154	1.37167375686149	1.25300836853936	1.00207065046969	0.942194624446518	0.901800572642661	1.02388385539126	0.809650290325098	0.705237517032411
IQGAP3	2093.57805646021	-0.889079251756865	3.26992930303508e-09	6.26427674554524e-08	3.09795199926182	2.83818776290653	1.83002212851147	1.31881122193456	1.49821176292625	2.24474000123994	1.65585337651642	1.59649612956054
IRAK2	620.097248759687	-1.04286915027852	3.96902739659201e-11	1.01094341881181e-09	1.5618609019883	1.62197364798409	0.794230024763238	0.707600250333061	0.606609370039675	0.693515713993056	0.551915057451058	0.528432357352954
IRAK3	433.180716290854	-0.962323847302254	2.91488932344041e-07	3.96618491946998e-06	0.426127061873479	0.488232314712981	0.212708516008032	0.233103473815569	0.552209367977501	0.427180274891574	0.246083253482878	0.227050394457174
IRS1	10895.2120005726	-0.339984438802587	0.000820399997523237	0.0047540316908748	9.5040720554155	8.7822034341826	7.15388065654729	7.2702120104824	6.93769897599446	7.03337016878459	6.80269794977032	6.72234399840643
ISCA2	519.59936190484	-1.32387719325549	3.74473859581235e-15	1.59269149397365e-13	4.60385508990885	4.45612645234568	1.88044915452802	1.58290479451053	4.48688536658357	3.86085815392464	2.06000902200713	2.06198136665115
ISOC1	341.572965699347	-0.605449693433229	0.00181945230957558	0.00933402540605628	1.33212462879985	1.48586300478748	0.881178904613471	0.91269476528732	1.67890018167274	1.73713287960275	1.06914576227966	0.89374473200759
ITFG1	4393.51217681615	-0.358026056229416	0.000811717531227585	0.00470775283441384	9.58764266694494	9.46650555484784	7.35413414620995	7.4817455867168	9.13630761787191	8.50762176768745	8.11169859735407	7.64775995657914
ITGA2	7151.69176884984	-0.796060570301482	2.56032630931232e-08	4.29632919769841e-07	7.3088463323278	7.82797440609712	3.79929444462315	4.7271843264282	7.04305107157341	6.73710651481024	3.88812324024099	3.75566680395152
ITGA3	9110.09508990512	-0.800632992072277	5.36509650821155e-14	2.00450083628622e-12	16.2066948471056	14.050665301294	8.76433135575756	8.44955227408293	17.8746177602361	16.4960453831313	10.6924610006413	11.1497190881718
ITGA4	4262.01824929031	-0.671123560779724	1.85127657987877e-09	3.69299642225079e-08	4.50458968472813	4.48016700122906	2.72719284604001	2.86593735160743	4.94966344060486	4.68122065319784	2.99758841281339	2.81399204837027
ITGA5	39308.6976845007	-0.838087681064929	3.66931025090215e-12	1.06725636867638e-10	80.5759014173943	75.6570000704584	48.7685211344347	37.8033050779705	74.8146821400822	65.0376297487011	59.1289347574523	57.2401161349637
ITGAV	14237.6725521356	-1.56197770048042	2.4291640600281e-39	6.44204782585884e-37	18.2829912518997	20.5802096909095	6.25412872537972	6.56515733432841	20.1943028299364	17.3366015636606	7.33204567071943	6.35988452280883
ITGB1	111119.30422031	-0.488563692650408	5.13627892986769e-07	6.62864241664699e-06	203.917017553542	212.422156308361	150.213871372558	146.208739190628	194.805704778828	198.727232744795	181.336521899422	175.202609531833
ITGB3	1571.59922918552	-1.31023273764104	5.36812627781053e-25	5.67218030526464e-23	3.00728701389201	3.03531301315856	1.16496143344622	1.20474854658683	2.07560769101165	1.82197736056813	1.47015124413758	1.28326450234271
ITGBL1	9717.24658565381	-0.533348448189303	2.33426586505556e-06	2.63381426779224e-05	12.7260042534048	12.7528816289343	8.35649123783617	9.13121795788659	16.4560543506777	17.2200930929735	11.8079358442497	10.9541080630249
ITPRIPL1	101.564467677174	-0.870377750268089	0.00386103864124184	0.0176123263483291	0.36689969066939	0.355914372350029	0.221692245293038	0.122181511071756	0.414344905289684	0.400647150919583	0.288477736474762	0.259210568109303
ITSN1	4146.8006716034	-0.503426888850437	6.29366611687267e-06	6.44374218249075e-05	3.68837551837065	3.90300802948548	2.67231724737951	2.66277419285882	3.55448360443269	3.63343453980625	2.98102497330971	2.82405834455184
JADE1	6292.76547161622	-0.670137359341759	1.0558456826164e-08	1.87898853386669e-07	5.6833276092717	5.83468134141084	3.96433649460322	3.24332498239573	4.20475290013247	5.24713978469889	4.77380775594467	4.54246941808861
JAM2	137.458177299544	-0.771283546108686	0.00299790540100079	0.0141672503663647	0.249986067517952	0.254246326800792	0.122668100735635	0.14388234832773	0.202109840950884	0.253492357048024	0.133405266146981	0.153045585963867
JAM3	3021.84629219253	-0.598716463192455	8.28962234433616e-07	1.02396157925816e-05	6.56953501470525	6.48837981483126	4.07301686834826	4.45672948251667	8.68352482471278	7.78999994963178	4.64803647392732	4.44013546477178
JKAMP	2613.71848750421	-0.52151942449887	5.60883797220814e-06	5.78638700031389e-05	6.65093179316587	6.95583465093557	4.92895334781483	4.52581365776161	7.21587383191488	8.04350959971927	5.21248025036993	4.93217933269011
KAT2B	511.685315052101	-1.14280323833518	1.78010298915618e-10	4.21727052866082e-09	0.901832773090838	1.04058226624693	0.403380078816168	0.430415834444224	0.849988560166268	0.740157881581572	0.521310768950013	0.428017206737902
KAT7	1763.00491815793	-0.506666783361447	4.22063135684997e-05	0.000358510519530469	3.60973196166823	3.8427038081965	2.70595796664502	2.51949473186174	3.16589618131485	3.20235782688863	2.6214403418255	2.45762679612108
KATNAL1	3598.90336845608	-1.03179449919371	1.04035755824395e-16	5.17310146148875e-15	4.04119248998828	4.25674641279056	2.20774500653165	1.799689274421	2.66727149215195	3.09970721617146	2.07153033239187	1.93296154509838
KATNBL1	1569.30716539015	-0.930529069642816	3.06038586770585e-11	7.97528301748007e-10	4.79603159835841	5.10369086346018	2.84405657561784	2.27666353973355	4.46684030858764	4.72116085338575	2.59260915242783	2.69784220115591
KBTBD6	955.083808712476	-1.15133631988509	1.13269677335659e-16	5.61162046140949e-15	1.71199971385509	1.6162651677193	0.775724042622132	0.687205400116511	1.58932682164831	1.59418504173042	0.793474666726294	0.677223682045794
KCCAT198	57.4002713651005	-0.838314039645643	0.0111066915846062	0.0412514449054812	0.836050114804019	1.06934224659192	0.364383169097614	0.463103821871069	0.352299619741045	0.382569551135702	0.456685893773851	0.421900105002262
KCNE4	523.711475292493	-0.57843494345318	0.000402794739100694	0.00255525274218428	1.34507612170989	1.26316159311478	0.910733606691476	0.809348160772129	2.55609075034315	2.30026446576561	1.36397725353043	1.45904351273223
KCNK2	842.285250138686	-0.914769859267393	2.42129375076547e-05	0.000218903729806838	1.9605401892053	1.8999777312629	1.26424414185267	0.682836901196117	1.31715327191348	1.61034209598589	1.47487369395342	1.34369902576968
KCTD12	1162.19529805752	-1.58018780193211	2.66157483592018e-30	3.95580215998027e-28	1.77739984724208	1.9110914573518	0.626903484548761	0.56535547827368	2.73760697875196	2.58837936305908	0.677290601829286	0.500818298215837
KCTD17	580.516078570194	-0.437054939976052	0.0106328642492265	0.0398632892290985	2.79679943557741	2.20747525663893	1.83816921808269	1.78757813009038	2.32182605562972	2.29751468441104	1.8155062716246	1.71628225533051
KCTD18	966.923410917446	-0.694751299401768	5.02720833035944e-06	5.23828911156483e-05	2.50879267873116	2.78859889071502	1.77208228549046	1.46496637905298	2.71337348865463	2.71206353746878	1.94095347717348	1.90225683156119
KCTD20	8797.6278195697	-0.856302503820006	3.57701199593374e-16	1.6798294182293e-14	12.8388489333091	13.658607282403	7.53301141443816	7.00577428766994	11.1689776039958	10.8652964896094	8.42103696218203	7.92040136867758
KCTD3	3799.72840572806	-1.00580901245748	2.9845978224259e-19	1.86882803464399e-17	8.02702818661588	8.5309701739514	4.11780517367614	4.02710716763292	8.50055097966381	8.07573426914124	4.91109893639525	4.76876036727888
KDELC2	3863.63622593542	-1.06007062673737	8.78358160508838e-21	6.35283108068558e-19	7.89497065613992	8.04222827832595	4.07087023134011	3.49149850074695	9.69081375721924	9.84581112975034	5.82993187403289	5.33906844479987
KDELR1	3594.09061108422	-0.612848378890532	2.83186875931585e-07	3.87270222141021e-06	18.5206427166123	18.2043762843368	11.3472901605246	12.4159434852547	19.0008828900058	18.6460941422028	14.3558878732603	13.1293501049498
KDELR2	16244.4716177985	-0.940921911710322	1.6021122249898e-20	1.12857124182224e-18	48.205273149131	49.937988840423	25.3141944851082	25.3693686522785	36.2803962584871	38.244144019415	28.6158277792417	24.048546227946
KDM1A	3464.29873636169	-0.537209723976672	3.47810123555929e-06	3.74234838591404e-05	8.44941066298475	8.89128399977974	5.85031853745714	6.02712621617871	8.36149527617182	8.29319154643294	6.29913052088082	5.97455475835862
KDM1B	1269.03122248873	-0.358132570066423	0.00837945356313465	0.0328118440768373	2.31491371787735	2.51594874784808	1.86788155341154	1.88398317565532	2.04443242351011	2.08429276601972	1.80381553256928	1.69415795306965
KDM5B	6655.10615247142	-0.485568916008043	5.21407728632573e-05	0.000432640461948193	5.06214326351749	5.38706314336213	3.53788124850692	3.87651415005441	5.59843841836903	4.91771812650321	3.68474287927591	3.74866516027235
KIAA0513	3109.49293037221	-0.335461961879323	0.00571533296516464	0.0240360318264464	2.86856677741263	2.4195793452286	2.21130178577976	1.9701898603639	2.53816044398391	2.63720224068863	2.38245278681647	2.27014562488224
KIAA0922	660.219861238046	-0.860768042012967	4.46985744239812e-08	7.15441679389758e-07	1.07156468689316	1.16969295353449	0.623231246563957	0.582547515318388	1.21928097684102	1.27633708886068	0.915828555655273	1.07593713397281
KIAA1109	18723.3801696544	-0.730131052242381	1.87588009516864e-13	6.55588586231417e-12	9.69683235561843	9.99712246160145	5.93804618671418	5.87522647542519	9.81032860853218	9.47084223520838	6.51514906695212	6.50138213280467
KIAA1191	5017.50590893568	-0.520383357230542	4.8686277091229e-07	6.31940400824253e-06	14.0327717149261	13.3953425586568	10.0601534314504	9.03201482778035	13.4828326047349	13.7569085707153	12.0756083034258	11.2853443594221
KIAA1522	505.545173785491	-1.04974032892726	1.53349219349718e-08	2.65903614321146e-07	0.914864654702597	0.707164484522514	0.408747791962481	0.337981293167435	0.861144449036092	0.796989912694176	0.485183401626506	0.495804119114324
KIAA1524	1078.96396379843	-0.559698254795244	0.000511489873881768	0.00312744147570114	1.9956152740322	1.97501739227033	1.54997019716239	1.12339711148893	1.14641682965825	1.54898468541897	1.30040858039537	1.2211517338308
KIF11	1701.6508662711	-0.773088357585587	4.4510545854978e-07	5.83338306868776e-06	2.7764911207242	2.8006260407863	1.87124893504195	1.34884883424045	1.76272747035978	2.33689122132784	1.53507877194298	1.38924371828557
KIF14	1047.00017313511	-0.81322317448349	3.08043328343993e-06	3.34641447056426e-05	1.17784356217786	1.24728334044535	0.80346427332468	0.548194228451533	0.70167510906676	0.987876527108109	0.621213081609127	0.558380096958293
KIF15	587.194605547537	-0.86146951522236	6.39556852645624e-07	8.10920857365986e-06	1.04380951897901	1.02823958951188	0.633522123632763	0.480569889401987	0.625381716551524	0.874354810673977	0.541899823395645	0.58010111841464
KIF18A	850.980206294055	-0.756553206293121	1.0104577954991e-06	1.22349522686887e-05	2.01117450371712	2.05907547116924	1.32601018187683	1.05144015594544	1.20861862846859	1.72576599266284	1.25273617457567	1.07780587362304
KIF18B	443.379493796453	-0.564955777747947	0.00221164191499639	0.0110012713866591	0.884045003651477	0.748983029688056	0.60210227212344	0.480576454660079	0.358956267254175	0.683348734151472	0.490681545630266	0.550840803915054
KIF1BP	2110.75957243941	-0.556272628305827	2.2435186360503e-06	2.54346936735795e-05	6.35146708041683	6.61442270988769	4.53043015306769	4.24929275701368	5.65418049041055	5.84439730322403	5.4810137552166	4.71437311044217
KIF20A	1728.6128978602	-1.05683285578393	3.79894683196505e-08	6.16076209860039e-07	4.41553595637203	4.54195001011825	2.60399258368799	1.5164091344691	2.59666438826939	3.98816808336051	2.55223075984591	2.32605056038536
KIF20B	1845.09410402528	-0.697887519536916	2.58377052263781e-07	3.5695093277504e-06	2.34368770554945	2.31432262993919	1.59444984477041	1.25573447619511	1.29421443749223	2.02037972570703	1.43706402598943	1.43026658586428
KIF22	949.075071768073	-0.579848225111829	0.00194198334409314	0.00987418222889464	3.25327293950772	2.95648359684833	2.49560704779954	1.59267878129337	1.87745018320836	2.61228273007224	2.05382713605233	1.78896489898341
KIF23	2183.46019997229	-0.503340153267455	0.000133734849584472	0.000978768312029214	4.31766882415509	4.71112213931214	3.4730779635776	2.88281729289868	2.48947799627102	3.84130544762415	2.6937475764904	2.62721328422659
KIF24	196.528558842244	-0.584911761698663	0.0104717162166265	0.0393930062366305	0.238755962607032	0.265885049770787	0.166469225083896	0.156026221111818	0.140392558277663	0.243768914610761	0.137871842523752	0.148786354678813
KIF2C	1115.74844780867	-1.03551487380644	5.08755561203796e-10	1.1317300929739e-08	3.07743600068114	2.98221065183491	1.69488498889199	1.18095410132133	1.52936295695078	2.43767932429724	1.6618285209374	1.44953741122637
KIF4A	811.055902814625	-0.960075419779831	2.12561363344603e-08	3.62991469600475e-07	1.5362823649237	1.61353120432722	0.91718049892856	0.661022022190026	0.766602720213943	1.11143057292838	0.805165889467255	0.699861129524303
KIF5A	113.182507912929	-0.82557784446978	0.00271882149642575	0.0130628990192392	0.250924168405383	0.25389837185863	0.147000264417608	0.110288279584493	0.138967147925567	0.124939520636486	0.0994296182749284	0.0950980375247593
KIRREL3	893.787649214576	-0.753683479895374	2.3505658326013e-07	3.2707204615157e-06	1.88349678543472	1.60332703589971	1.04738552291906	0.979733319708446	1.66769397710478	1.77516637503354	1.51094577728512	1.37832035512506
KITLG	2164.58209320979	-1.01176719360178	4.29654330007785e-12	1.23903514144036e-10	3.32724758622859	3.6865483832627	1.93788333145261	1.47637816863984	5.24057949802604	5.4478254236408	2.75819271918519	2.48395638472099
KLF12	4218.60674620267	-0.471644489212367	1.9052567718386e-05	0.00017565506366133	2.94887874391778	2.95196970388957	2.07883241288456	2.15662755311767	1.80487593803387	2.0933232573097	2.08308730918423	1.95761803419044
KLF9	1170.74472063535	-0.461569086393692	0.00404361289814727	0.0183041331135453	1.6840877744569	1.75292839977494	1.09472374333445	1.35353639049952	2.60854327660243	1.94859845551102	1.0401466054622	1.08009482115046
KLHDC2	1981.7293329938	-0.395816204585691	0.00107626601242438	0.00601259719869464	8.1879895795009	8.19238946239757	6.08215047518838	6.30146491364192	9.80984728537408	9.49927359260998	7.39566322508612	7.31769412782067
KLHL11	1408.98720081342	-0.60173286398973	2.03612430967134e-06	2.33180197191405e-05	1.47738558213883	1.53666874932262	1.01374429884644	0.957976103381221	1.6080725415374	1.58362501448994	0.820363622234529	0.786026179467801
KLHL13	169.688454142915	-1.17432080928115	1.83630751966453e-06	2.12274010286007e-05	0.341112929600722	0.326493710027135	0.152567388525465	0.113628744404891	0.473795700012143	0.624709934362913	0.259733136161154	0.241505449607179
KLHL36	4953.76706040373	-0.797217548763849	6.56859679831207e-14	2.42071585005915e-12	5.53354890113969	5.39989135984787	3.3381558920792	2.91940384991845	4.89429042518493	4.93950620846889	3.65255344561299	3.36887309592251
KLHL42	2665.7348459399	-0.829450386144246	1.00917162012756e-13	3.64947758348268e-12	3.44582201436693	3.48932897456114	1.96647548032288	1.90005976621011	3.05202459507777	3.02830957920166	2.07644824709688	1.88334798147972
KMT5A	1604.49581221337	-0.604938308744267	1.77890786069053e-06	2.06167342038042e-05	4.04208255439388	4.27540637914414	2.71216070994299	2.70733213193385	3.49797958671234	3.69897524157541	2.99833121740437	2.853806581351
KNL1	1897.63283957944	-0.98818280369231	2.99806569746995e-10	6.87268450140358e-09	2.17219541539094	2.16900439871724	1.2601252334763	0.880248065175092	1.13757249238127	1.70315293771378	1.04201204900796	0.948107060390416
KNSTRN	887.444620258385	-0.693403603230205	4.95497730722841e-06	5.17898516849028e-05	3.50435146497539	3.60151031381446	2.41078987503564	1.93691847415026	2.45452153169509	2.93026755242732	2.12642901493493	1.88475593109654
KNTC1	2702.94439170638	-0.507092411092724	8.69971747548459e-05	0.000673133174233004	2.94399812500802	3.03911867338795	2.3355931458858	1.86643758298293	1.89608110577449	2.30001623074028	2.08129313337666	2.06657929599252
KPNA2	5761.86457342446	-0.538922085331746	8.4259644886399e-07	1.03695331855191e-05	16.3468264427085	16.6852797743681	12.20449097945	10.5019842285166	13.6815089672072	16.6436221496297	11.6625287532797	10.5587168471901
KXD1	1840.73000246215	-0.798441205143183	2.21821753769561e-09	4.37976528428221e-08	10.254052668045	8.70044022010077	5.82914324488678	4.92236382515508	9.75740459791113	10.5502366057203	5.99121776349493	5.49517755694218
L3MBTL2	1011.00833733298	-0.418923120813725	0.00204569357070662	0.0103238826655996	2.47576330988957	2.28968606158616	1.86589151417829	1.68119185173274	2.06015811468871	2.12949770312617	1.61853476364827	1.56530150396449
LAGE3	111.046812990367	-0.848424515175996	0.00193104958600197	0.00982967468975408	1.04091629151311	1.00786149275937	0.565319246586877	0.456080231617642	1.09240353322949	1.43856632584589	0.576424306577667	0.599716741158416
LAMA4	7148.29237303006	-0.580197130122439	1.13016871422249e-07	1.6852846593009e-06	7.6559682047251	7.22565910409067	4.78624080169379	5.09585565324363	13.49670039292	11.2273571435815	8.33456008231512	8.33544267600419
LAMC1	64392.8140888629	-0.690261347048235	8.6797786921575e-13	2.8287712484682e-11	65.9003312352008	66.404277004064	40.7185940946344	40.9222204165809	81.5720675429739	73.0093753711891	56.466225011189	55.6007986235827
LAP3	3542.00980922268	-0.457307973228555	0.00871539430058823	0.0338820660866501	13.4561487049028	12.3067732705124	11.496170678806	7.10124818121857	14.5151469614679	13.0928218331533	12.1706197592168	11.1935436184959
LARGE1	1611.84464864161	-0.622692676779328	1.01411832449951e-06	1.22463842311213e-05	3.2017250528391	2.92993523490967	1.91990133489084	2.00868349656465	3.13621968653207	2.81110510030534	2.51745986532159	2.57875409981908
LARP6	3325.48213256067	-0.372318397144931	0.00087502994579803	0.00503393450315541	9.25625807955362	9.77576306928391	7.56285693062016	7.13765963466516	8.76903055051224	9.59486048749699	8.84965234345037	8.66330771456073
LARS2	1364.7247640829	-1.03571347237483	1.22819192752144e-15	5.47904195971534e-14	2.99366031472116	2.76375173763083	1.47331528396768	1.28759578983975	2.68375362574125	2.77569588093805	1.48228073496646	1.43440873264489
LASP1	17864.0345246417	-0.378329057886752	8.10845121956307e-05	0.000633545943065226	31.8160490755964	30.0909978409251	23.8789962125952	23.7100869693239	28.244822978429	28.2032534263806	24.6517821006517	25.201478007849
LAYN	3662.40597369659	-0.672856408318586	3.12502308076599e-10	7.15159681342809e-09	10.3627988053742	10.5489142298235	6.74497888177534	6.31145404615166	10.8425934246098	11.056379361669	9.29072430343909	8.99852865725558
LCA5	562.191267641801	-0.616025469374088	0.00062686191069915	0.00374649020866372	0.885953379762124	1.02319913987062	0.564580163666559	0.644595854141446	0.845949103443291	0.80113420307756	0.629510215130332	0.567961607160887
LCMT2	358.32450660718	-0.520372061348734	0.00520995604209801	0.0224124222230838	1.0444210601714	0.91981841982867	0.705850584721468	0.633621953482785	0.853270421477764	0.938924408477505	0.659151869095758	0.609014675129864
LCP1	19.7036025005952	-0.875070454446215	0.00930846582310862	0.0358272624523461	0.10794225097008	0.0156639887356161	0.0119960637943506	0.0023958160403997	0.0183716350516148	0.0125947879331674	0.0220510603062308	0.015715103044223
LDHB	9921.61599609561	-0.492416095801153	2.67921149491192e-06	2.96290559842058e-05	46.0152189828438	49.1193886169256	35.0129466570462	32.5385980015937	47.5947136036666	52.427068976602	36.4104765893451	34.3223594453727
LDLR	7208.91362981209	-0.531370824845789	1.24536679625333e-05	0.000120148764354255	10.937543111793	10.2821054962722	6.79867776011074	7.74066561157014	10.499849041645	10.9889059832607	8.97675051804859	8.72728449377446
LDLRAD3	660.646801699478	-0.441895150699582	0.00487995827539955	0.0213114096463606	1.32593236232755	1.17420685774956	0.979352546956584	0.845155815531344	1.36174738283631	1.33289343851182	1.4623140075881	1.41232626666085
LEO1	1131.37329994609	-0.389281077799735	0.010641465645164	0.0398796959963543	3.55736318533737	3.83195951127656	2.58948103579731	2.98169751678255	3.50951449542666	3.37438941237947	2.56576617866836	2.42305440507317
LEPR	911.668177740207	-0.686673598388563	4.12331659312454e-06	4.37738280392538e-05	1.00924673196956	1.14006227307454	0.686165796717634	0.631608636216282	1.24057932269805	1.22193020482465	0.896363776068651	0.761561307765697
LEPROTL1	1188.1651156656	-0.950295673708248	4.09412601911162e-13	1.37402120120309e-11	3.2499295454131	3.31176419682294	1.68453401195317	1.64848689200285	3.6629756840721	3.50991566130138	1.60063676244873	1.564552447127
LHFPL2	2225.4336256386	-1.54345658236098	2.35623424752578e-38	5.7941942177793e-36	4.32745908779233	4.33824698662909	1.42207926758709	1.46686152158347	6.20146770716195	5.86246560690786	1.82824131061513	1.86006873873635
LIFR	3609.1253457572	-1.1659148910976	6.07432653421692e-27	7.33529164065034e-25	3.12300458149036	3.19066417906993	1.45096675489334	1.32846076431038	8.53000586176278	6.84513588202153	1.92295119738274	1.77865821336947
LIN52	358.420217842845	-1.12906624197127	2.64860116466427e-09	5.1542921945445e-08	1.86464608474644	1.77930792821485	0.869854734845522	0.715435796639567	1.30375939588573	1.41238148019393	0.82821365344729	0.835507020271681
LIN7A	703.866212709633	-1.1633831806424	2.83289462731095e-12	8.38400434012705e-11	0.951292810298614	1.1360378118718	0.456269839818144	0.438966652780346	1.33992467222067	1.15279209177603	0.671460919010208	0.676991331602575
LIN7C	3130.15527569064	-1.13940116117848	6.90782529323713e-19	4.2084836527492e-17	5.6327187093716	6.05791886792115	2.88045468659377	2.34114975972521	3.82998189574012	4.68291451421092	2.51635022721479	2.02271312442219
LINC00265	228.821532084945	-0.605162432656716	0.00555172682962196	0.0235604346942695	0.434016241768416	0.36077843325266	0.252583787669937	0.245708716121469	0.379828148167322	0.425537854315584	0.287936325790232	0.336305310720518
LINC00294	905.359321975062	-0.757291053221162	1.15124886536848e-06	1.37307239013304e-05	2.27940927669336	2.27726327948935	1.21056798689616	1.40758239768205	1.49346044671392	1.48763309091394	1.30113083496927	1.39364355065299
LINC00346	162.454646588521	-1.44318078269806	6.27384136115898e-09	1.15447216883912e-07	0.252529613923721	0.257716084485786	0.0920520478948963	0.0713350878505809	0.353661562592433	0.312590603518123	0.159835465884814	0.152831296679854
LINC00648	86.3067051575625	-0.898324690185384	0.00245625237618949	0.0120191075933295	0.266220332814414	0.274273584236474	0.110275666134484	0.132143450211651	0.26002788149785	0.254714966218729	0.155321539566442	0.17656650964024
LINC00672	181.947855529426	-0.689896704729899	0.00487274664714727	0.0212867888897503	0.367556442671153	0.450233609052973	0.221660745409154	0.250040046217049	0.328989827999349	0.346499945814649	0.26752086607111	0.372834056573427
LINC00839	746.148640161285	-0.407436705021395	0.00535244833747392	0.0228726267817803	2.53562565174083	2.32271427455352	1.8690762154379	1.76273948701262	3.95212341159008	3.08016298546645	2.24040024525814	2.1896725224146
LINC00856	30.3809449921315	-1.11978824334708	0.00175096778346942	0.00903886995092515	0.131150559749896	0.0960737007944496	0.0258416095378124	0.0301058612441938	0.134667311838776	0.183136717470838	0.105259719808299	0.0587726865379959
LINC01111	694.711623815658	-1.09817555153092	3.37951917152642e-13	1.14556382944599e-11	3.77450112843186	3.86761732309494	1.79752123208184	1.66940188834164	4.93738781781023	5.06757708993691	4.40836519780047	4.05789720970057
LINC01119	79.9313535032824	-0.857573864695503	0.00464435627449795	0.0204630349025768	0.643214840390544	0.545147082717951	0.247991355166847	0.295167176194919	0.415597088610222	0.426057735273066	0.401856137331281	0.437540793664683
LINC01184	381.258984668116	-0.607974545336182	0.000732729070722597	0.0042956916694942	1.04712378969191	1.01824764509295	0.66181398665041	0.656778552289171	1.20473589667439	1.18931635925168	0.77159031107849	0.793061203276618
LINC01224	193.679958583753	-0.783874515344604	0.00173313508965943	0.00896392049240679	0.619490098733151	0.664521734802382	0.42606870860372	0.275370723779223	0.241671211230405	0.365322618831476	0.34709813892272	0.268743330118917
LIPA	2647.27832252828	-1.99655427531664	3.41479222005516e-46	1.35838425812488e-43	9.98522143021841	10.0467503929732	2.75427563096155	2.05573825976118	3.73944666195597	4.80931503739731	2.1761811948212	1.97373116791284
LIX1L	2430.14032598484	-0.844304496208398	2.63115642351808e-13	8.98646227981869e-12	5.04402758391406	5.24133246773904	2.87231804235082	2.79622299774613	4.47096810907498	4.35012995787253	3.3287047723291	3.08676151973448
LMAN1	13858.9128105362	-0.696529437751078	5.23617797405943e-12	1.49093278103482e-10	22.6973371465226	23.8470384883543	14.7192496869303	13.8900763841167	27.3882330372615	26.1699005908193	16.8423256647149	14.7620575028041
LMAN2L	1060.20066619347	-0.555015719769665	0.000400501044973885	0.00254308762125436	3.30648359152221	3.20124972557746	2.52168256174358	1.87672882119087	2.9939920304423	2.90556281623419	2.3658778355478	2.13076196726776
LMBRD2	897.273328606431	-0.621036598494869	7.25716267785018e-06	7.32815529637488e-05	2.27489044213124	2.15392883652696	1.44106190629855	1.39975015562692	2.55015295830422	2.40956930490563	1.56317475107056	1.40247571512707
LMNA	25335.9699874548	-0.431547202738493	0.00253792763235507	0.01234729180849	53.8947414467249	39.6210747823028	37.7679231984364	31.0098086437704	51.111041665998	51.1235638500666	41.1850980732323	44.0783835579227
LMNB1	1056.20469581107	-0.65864592090906	0.000154202691262633	0.00111172249431083	2.42500793138644	2.48047403862722	1.82591738952206	1.23729227181868	1.31127112703616	1.82928711633967	1.68277618266	1.42774236789369
LMO4	2517.67917036969	-0.587431964415066	2.96366066730673e-07	4.02849352013302e-06	3.59616887494425	3.74907886052276	2.51508963041554	2.35249336255785	3.96916068975033	3.53083286908945	2.63982958299276	2.5075418361808
LMOD1	4322.25677853659	-0.825693282879379	1.50773887038041e-09	3.06649146193911e-08	9.28386183066909	9.10210110477857	4.58891322030443	5.55902196375389	6.54881921428431	6.7095073653427	7.4175639339382	6.81965838494606
LNX2	537.857402119776	-0.857504608490748	4.05093197905714e-07	5.37672767583393e-06	0.905587280888884	1.00234891374847	0.545126709109472	0.481350894666928	0.834202085438784	0.782984722276503	0.510828977652687	0.528983540717003
LOC100126784	275.49313819416	-1.04636512287528	8.03827417750683e-06	8.08911147699255e-05	0.747221552191785	0.591001256966359	0.362358768938631	0.236373513023941	0.492454377262417	0.597475989644765	0.483612473374658	0.44248492271853
LOC100506990	1277.95738751882	-0.594105635253224	1.18468961783918e-05	0.000115438955916966	2.55392669180931	2.31512438864432	1.73898195889189	1.46275413931263	2.45476137544097	2.59053306657892	2.2005055294898	2.12049930227701
LOC100507002	26.7173934281708	-1.09893114581007	0.00230746105721271	0.0113940893752471	0.342105475548377	0.461739579062105	0.116910210292942	0.0778297953695561	0.37577284011922	0.463704106590845	0.173659259346732	0.122902083649026
LOC101927204	471.574387401018	-0.769998886254463	2.72227952667448e-05	0.000242069892164841	1.79036722046967	1.71515019827165	1.14573625502285	0.861117727040725	0.974812734110543	1.27092962010193	1.16027349090467	1.0283231397855
LOC101927751	302.624778169215	-0.693308859924544	0.000483383353755367	0.00298527847467641	0.328517140210442	0.300704152503406	0.204958454019116	0.171706722861655	0.402646746353044	0.340915726154507	0.246293998313714	0.269840832005246
LOC105370526	553.210316086102	-0.97560970495553	2.33558765065931e-09	4.59808194689478e-08	9.15437025329969	9.05905579934229	4.84505937174003	4.16244194331032	9.68151081843416	10.0304607539792	8.23904037660504	6.35706548994242
LOC105376575	632.596474290955	-0.618725869036031	8.09398222780591e-05	0.000632780980526445	1.54499247021848	1.56446326546388	0.97495014079419	1.00890475479054	1.34764832604426	1.39903136523613	1.2230840308829	1.14871260978825
LOC107133515	465.721366672013	-0.442690500134076	0.00968271923347805	0.0369940049810143	0.744502979109251	0.793505041242251	0.575607517866056	0.542530466356802	0.848204442757175	0.980229029274943	0.575149493920817	0.532649046453336
LOC728392	1885.97037215326	-0.496610898368206	0.000783572139234787	0.00456999274823221	10.3456545351703	9.17205402481035	6.15742768656063	7.42791765884638	14.7060857369852	12.6865029595636	13.0833292467479	12.9873859325134
LOC730101	392.843709029237	-0.717827810017022	0.000131292974265018	0.000963122857043282	0.888639465312965	0.822791759730117	0.567112013753643	0.447128243600354	0.539755789500932	0.595416602481093	0.580260111090181	0.445967269705464
LOC90768	215.384171046731	-0.604223286188084	0.0067008559074261	0.027405224114889	0.359655139969948	0.296266195284234	0.211066429855158	0.199915076906977	0.340178225766486	0.338706861601829	0.252345026791817	0.219802527408075
LONRF1	560.848317640161	-1.49949569574578	8.44545223503165e-19	5.099318816018e-17	1.55089423976268	1.55184690283214	0.57969582411357	0.465319964480264	1.0933670872796	1.19571257220969	0.518650890926241	0.446165099153349
LOXL1	4353.70779657847	-1.15320605801718	2.68548594343413e-14	1.03479194828908e-12	19.0324921676277	14.797514080589	8.43662027096273	6.30918909715512	20.2101680865419	20.3139115110367	10.7527711778625	12.1705780499348
LOXL1-AS1	624.866493010096	-1.04466754434909	1.34751109637058e-10	3.22567921741806e-09	1.96824924179336	1.94826826608483	1.01992694008494	0.826918770540349	2.00757269386106	2.01746005670109	1.41853785819225	1.18673709463114
LOXL3	3310.15257973779	-1.68766048724204	1.5156481320938e-41	4.3615193588444e-39	9.10587602793809	8.34677109494626	2.92233030235869	2.34706997260747	13.1162116538989	10.9385255250266	5.28312052569659	5.49030104115293
LOXL4	3958.85104148581	-0.617477652027714	2.76416260449006e-05	0.000245310362373544	9.24138492363559	8.05009469648882	6.497142941902	4.66049440051316	10.9648011166059	9.75047360164844	9.01448025044144	9.18747428704222
LPAR1	23585.5362229427	-0.524663841867014	7.90781959102929e-07	9.82123599345006e-06	55.1093441441626	60.1140123877256	40.473681703793	39.4218068107645	58.9541786738958	58.9174399469913	48.9598651691618	45.6561664278162
LPCAT4	707.131535254646	-0.630075419430524	2.48529753113153e-05	0.000223346505704677	3.017479070012	2.91785118844277	2.00637310583101	1.78144660319148	2.76535260008811	2.91208923765431	2.35334236084064	1.78972071496647
LPIN1	4161.21173113412	-0.73540114414755	3.20199582645175e-12	9.39414176849457e-11	5.29404825830552	5.27722794828757	3.31717064717064	3.00235439101652	5.23390186782586	5.64447672926208	4.06396533249124	3.73448618205142
LRBA	4520.37149575422	-0.324313641522936	0.00283812612220014	0.0135065643218708	3.26027262029546	3.35407418408384	2.62433668240789	2.65312083284357	3.38884304767946	3.45181112491594	2.77599946247501	2.89549700333342
LRCH2	1084.00340433951	-0.628354099809976	4.45581862983506e-06	4.7008538977004e-05	1.726156561904	1.78936643256555	1.20193982697109	1.05520170394438	1.32266653906401	1.53331122018125	1.1353965788761	1.02122465445189
LRIG1	15483.3624096521	-0.467562812291056	0.0028320385133506	0.0134965894619686	25.7560929739645	23.9887383158263	21.6002102100806	14.1337767947988	17.3803177762482	18.4521630675661	22.3492392042513	21.9074065946802
LRP11	3860.79877820008	-0.413124347247581	0.000119947827405601	0.000890392077750142	7.89034728994766	8.09858331435627	6.07709053319311	5.91288458280228	7.78781971352339	8.41220437248503	7.14820486407188	6.60682970400557
LRP8	652.568927860312	-0.739833626877725	1.79813268828891e-05	0.000166802089225703	0.695398918943972	0.698050429964019	0.363627116722723	0.440171509965836	0.58294828270732	0.71199338651636	0.394680134878937	0.365906639680685
LRR1	560.134624827022	-0.496709775419596	0.0118492087337303	0.0434428159728118	2.24302150916306	1.94101814642605	1.75456176673762	1.16659174975057	1.55998883429647	1.83752670143899	1.66025540095419	1.67599969353286
LRRC15	183.886046599371	-0.956000924670276	4.25391951360475e-05	0.000360942668892749	0.292287085590575	0.259853442762223	0.12705729925215	0.132482442548253	0.280024818963867	0.348765368345956	0.486041277212024	0.51471812810276
LRRC49	717.477987339242	-1.0658500506335	4.27547355066189e-10	9.57380459812948e-09	1.59692973422144	1.93242614421716	0.787446743911538	0.828634571144767	1.83394688868979	1.62210099673099	1.05146184192707	1.04463014371245
LRRC58	2956.79025586166	-1.00476548257024	2.7701450029042e-16	1.31460390050103e-14	3.47278097277242	3.29427635198545	1.83682954375826	1.49425057982059	3.67743026422267	3.85576900079616	1.71373525570676	1.55905585742064
LRRC8D	1998.88585874437	-0.512003278066559	2.02520606729187e-05	0.000186206064310826	3.86121020444533	3.75558175467591	2.85671515827687	2.47171705350585	3.79760557820387	4.2126768176144	3.73504552124079	3.54408582775592
LRRK1	2080.00587342476	-0.490795247719415	0.000422172796393171	0.00266817152860637	2.27631777444685	1.90381479047898	1.38570409598509	1.54511967921774	2.24500693779386	1.95641337847112	1.80951657849804	1.84791256002477
LRRN3	1222.14152334571	-0.526997259616716	0.00428267010139856	0.0191925490793292	2.52463805126424	2.60523845444217	1.41994513529931	2.02863757241758	2.61135405395433	2.40784499547638	1.63693771261735	1.5483567286406
LSM12	376.000246136842	-1.07973157293116	3.13150096111232e-09	6.02026330775407e-08	1.37379312342797	1.35961964849205	0.651592959496359	0.583653837614335	1.35482179852589	1.3490113075373	0.83500111868862	0.666043126426966
LSM5	820.660896928282	-0.494184199921919	0.00258686119428942	0.0125427873616165	1.7389051928397	2.12737596478843	1.42591864451218	1.29411733937605	1.79136102144934	1.88012988358291	1.37059174250876	1.20397423445082
LSS	907.425323315636	-0.555096797613762	0.000124080298174883	0.00091854736333623	0.872356614147212	0.751132271878072	0.573172010137137	0.518540013604303	1.03529586099723	0.933682509901574	0.708404279479217	0.732461891434762
LTBP1	96752.5786745388	-0.449676450795732	1.83525588750802e-05	0.000169663949955885	112.930824651951	117.886158756451	90.9960549840477	78.0504166564023	107.14710770105	103.529474259608	103.432821325641	100.417990085141
LTBR	3370.76572354745	-0.326718025315607	0.00514196810164563	0.0221976120570562	10.6659437592062	9.09202640935917	7.99602320052998	7.70568697686917	13.3489502970561	11.689629045674	8.90090707788949	9.23044475933491
LXN	976.906188102258	-1.17217313450957	3.63252911022063e-17	1.88237380136912e-15	8.0825994969763	7.95572802633888	3.40580720148496	3.49319710798446	7.97913180698017	8.40909750540692	5.1535641536645	4.88033432521395
LYPLA1	2785.68891903725	-0.389889189054378	0.00797785625754959	0.0316145636927507	6.90239691555941	7.96045654225349	6.42377607093478	4.91434251527006	6.28347964365493	7.03524088346557	6.32860401221469	4.79612928582387
LYPLA2	1217.49046777987	-0.469123389775926	0.00306807971283682	0.0144685418814916	6.34074803818113	5.14217370771134	4.64169369410197	3.580245136612	5.20689292913676	5.06735471451963	4.29001995746103	4.21762787058164
LYRM2	1390.95697929237	-0.859620737914678	4.28343435738727e-11	1.08489606149181e-09	2.06584324991365	2.15162678346196	1.22312277887757	1.07432676729304	2.24715048769359	2.30741104676139	1.2703370257679	1.14316129966782
MAD2L1	652.241949701402	-0.739714520233606	0.000990503571795896	0.00559082436522841	3.74525289938495	3.83558046674152	2.83681847321779	1.52178809113949	2.11730108792392	3.11801692187806	2.25917272887962	1.84339958333658
MAD2L2	708.315627050628	-0.643579669171144	0.000162320614214922	0.00116219497472569	4.49313981126226	4.09783942261442	3.11545364610961	2.30422298289135	5.03338531414122	4.51462449630881	2.94635556261751	2.99495520106264
MAGED1	11426.6291734417	-0.73830590535293	7.01818876670518e-09	1.27925880147827e-07	32.1191358434043	31.1931033685749	17.0941367017632	20.2676850235824	30.5114222638897	32.6705833513254	20.8377968487066	19.3525705884045
MAGED2	9925.15938760831	-0.411225788864025	0.00010066590079484	0.000761468852488929	30.9901102078546	29.5476818835835	22.0904414447158	23.2762580485559	36.9758711372549	33.7423031811203	28.4237163802557	26.7701908697715
MAGI2	1639.2708468397	-1.22254859557142	1.01263781819449e-23	9.5110600632503e-22	2.2102599401345	2.18597641250332	0.971419625253856	0.878539009585776	1.56641628078083	1.91214509754416	1.17939373444419	1.20717218789881
MAGI2-AS3	6550.26860584402	-0.844189035513093	1.36280854619602e-12	4.33693778524734e-11	5.87235736524946	6.01800679199981	3.6360342584304	2.93469018435259	4.82575386388854	5.18881718657625	4.57504367242495	4.00637391287548
MAGT1	7798.42314612208	-0.519943747523806	1.07881814365307e-06	1.29697914603625e-05	14.7698359998006	15.2136030703875	11.1644421164271	9.72824052542624	16.5350604297234	16.1591285795171	12.8257792948261	11.1964496498198
MALT1	3188.66481301693	-0.427374308327219	0.000156105350917844	0.00112364282659066	4.64387212376678	4.89278718966405	3.70409354148812	3.38414334449822	5.01565116442606	4.66334167305341	4.26401667985931	3.9772610370042
MAMLD1	344.444870808852	-0.968698606471825	8.74914953042916e-07	1.07477063941012e-05	0.691895419083181	0.564619826248782	0.293745590105038	0.308899233565499	0.722710049563593	0.791642026563043	0.423651768236562	0.469782418506487
MAN1A1	2422.74711887202	-0.472292475672327	0.000148543391660505	0.00107582056630568	3.51922208161835	3.83022487505267	2.82720997903561	2.46315656565433	6.09593696274565	5.16559179810768	3.11944124110004	2.76849868157689
MAN1C1	1138.18459921101	-0.475018803779598	0.0062593076651796	0.0258732078763918	1.94788562623699	1.82779911556582	1.13050429594482	1.51498755357365	4.0607871463509	3.26250870842463	2.13636249479153	2.07759990575045
MAN2A1	16782.306530708	-0.326183852444422	0.00112193725049368	0.00621424483588154	16.8718415317215	17.5217736164838	14.3936543697275	13.0922197558678	8.57496482097453	9.76425009380216	10.4960837837519	9.96484704087129
MANBA	2823.79217001288	-1.26910647923692	2.55850423856181e-26	3.03541840583759e-24	7.60033482499126	8.27772339389501	3.26810313010574	3.19034514728389	9.6782185286271	8.2464478600287	3.39149557762249	3.44181798737393
MANBAL	830.01312065194	-0.48149745291098	0.00348993776857364	0.0161262071472355	4.87142587805579	4.85064826673607	3.07710439427558	3.73102952284898	4.42421881097646	4.63911534059684	3.37991761893949	3.412069546641
MAP1A	12575.7777462606	-0.950172072138949	5.16570743703557e-10	1.14722812948943e-08	10.8899414515801	10.459035414779	4.55845520684792	6.13296262620119	10.1662499530637	10.6134947952227	5.63515846007915	5.34512501996847
MAP3K12	1704.07614864741	-0.593607303040415	2.73089115247218e-06	3.01021213017003e-05	3.90899365490374	3.51197529129654	2.38316967135613	2.47292533578055	4.2508239832491	3.78988933271363	2.64872115518032	2.43986089137564
MAP4	20255.4515276363	-0.411220301028968	8.99486314280587e-05	0.000693589076433577	17.7484718541996	17.0788687871721	12.6482041832113	13.4587014362947	16.7612321417446	18.0978199237937	15.3948465084897	16.190609849045
MAPK1	8257.24659486033	-1.05132909038037	2.44897365665204e-21	1.86080723068645e-19	11.8341955107288	12.2627877399882	6.23350200202281	5.27833081334414	12.1506307817768	12.0843012917289	6.47419855954763	6.0245966991163
MAPK10	487.836952708445	-0.738740773567885	0.000500919098593258	0.00307253097889969	0.568474237041186	0.540443968982078	0.251624435247968	0.371154326504605	0.786033401720768	0.716143195482573	0.344220825719496	0.351896278572695
MAPK8IP1	342.060011732572	-0.500172394918967	0.0101182096602912	0.0383452280184629	0.90907903278846	0.753272502503813	0.558915513932977	0.578900419363434	1.14659511186235	1.12298351591561	0.765685618921531	0.782573449948078
MAPKAPK2	5371.76444390363	-0.341635202295264	0.000966526572380853	0.00547415070831283	11.5413177918155	10.8556346058388	9.33604835426247	8.35380021730321	10.7105535380951	10.6353583663889	8.88077997267008	8.54462617386233
MAPKAPK3	1456.18552553163	-0.376190088263909	0.00263547250980992	0.0127393730147173	3.44311674301782	3.40378911301728	2.7858718046336	2.48530391070667	4.11975353997238	4.10880889209757	3.32289254375596	3.46526965949839
MAPRE1	4286.15975230943	-0.507339924939347	4.26246641923035e-06	4.51801397492872e-05	12.252910403465	12.9259922464965	8.86768426951931	8.78358710651804	11.2729323905604	12.4258266682828	8.24062178300174	7.56897198342928
MARCKS	7992.62051886388	-0.67484888528544	3.49962451197194e-09	6.63848829234508e-08	14.976383553263	15.0185615855778	10.2882433086404	8.42292545981542	21.0660609360297	20.4283950349009	15.6998093179148	14.348309997912
MARVELD1	3368.12890814682	-0.371481794208969	0.000529399903282031	0.00322673893280282	7.84189875986704	7.55607202066413	6.23898341888708	5.6653882384392	9.33064400114308	8.5175473103641	6.23157502115967	6.23754140940627
MASP1	14809.6869449636	-1.79166823428315	4.85988133141059e-75	6.57298950073282e-72	15.065956816663	15.1779115470885	4.31267735921533	4.2584179779197	21.6310796184062	18.0944985548113	9.51713645332961	8.975819497112
MATN2	1193.80756779376	-0.530686707044104	5.67163102176619e-05	0.000464339040976924	2.35693170853923	2.09910387603773	1.57873953041468	1.47779142500255	6.79401959628727	6.08754728168669	3.70952003029021	3.42475350599924
MATN3	780.474527276922	-0.625435016299565	1.47810487109956e-05	0.000140784284377616	2.40277332645766	2.42859542994338	1.58414919096128	1.50691232829342	2.3991235846923	2.60570217716041	2.22956840421448	1.86518067326435
MB21D2	1634.17485544185	-0.973807899117865	2.05791298672499e-13	7.15508307081118e-12	4.02738514613864	4.44323206463089	2.25502484626026	1.99383790863566	2.81933028510629	3.4081713105185	3.02820589973122	2.93251093562046
MBLAC2	374.645981224724	-1.15930049834552	2.10996602775276e-10	4.95439071620765e-09	0.799644905365707	0.810664280996886	0.350548527747529	0.333080004326878	0.757381624566845	0.896690046692301	0.362128245249903	0.312335633141127
MBNL1-AS1	528.476088426951	-0.757218342785206	5.64376292403219e-06	5.81354863271404e-05	0.668603074082303	0.650114105135518	0.415306035495762	0.349236261273649	0.605576369801151	0.730070052576702	0.478273932977732	0.439463580355593
MBNL2	5060.21714978804	-0.734392890038906	2.17293344111626e-10	5.0648012482712e-09	8.46714062414085	9.08155171490681	5.11782229969456	5.32919045872571	8.55181397371761	8.58712375289947	5.71704802978728	5.27886961188629
MBOAT2	2611.7781166328	-0.889654161765779	7.98056412994454e-12	2.21636816955852e-10	2.6448061687328	2.86734578108937	1.6165362410876	1.32614924990801	2.35342409091369	2.43267862455502	2.04572215466555	1.86524045469619
MCFD2	15707.5640242145	-0.83578247103843	1.48423110702464e-18	8.76603743340971e-17	28.4851132492288	27.8347271194167	15.8488796581822	15.5215785593266	30.6066206321676	28.7787900405226	16.67555087123	15.5834076250434
MCM3	2028.02499967596	-0.468039395080315	0.000873286891871398	0.00502604477130241	4.93927221814703	4.70869093361338	3.95693604524325	2.99935306933834	2.65761303421562	3.68720268855655	3.91247598793175	3.65959638105124
MCM3AP-AS1	63.5822629806609	-0.84841040501079	0.00825453180400712	0.0324542275143012	0.137789454867318	0.106504622321527	0.0637496366585692	0.0469407565963732	0.119983954623853	0.150088558476148	0.046809047226719	0.0576439313089679
MCM6	981.495466836548	-0.508121211022246	0.00100175172030784	0.00564764152445334	1.96030863992601	2.0414153180459	1.57753148824118	1.22363336117057	1.19101644987227	1.75710428560302	1.45652290071312	1.38052959025637
MCM8	777.837021575438	-0.52703800075254	0.00240684140876614	0.011811513081844	1.56543800195128	1.52286559420993	1.24333080787732	0.88099004480817	1.03613834591697	1.21283952249076	1.08730853229371	1.00448818366993
MCU	2026.91373593479	-0.445387138498506	0.000368880470491905	0.00237237677765241	3.9912305480644	4.38850848952469	3.16764914045085	2.97048022885871	3.97605350839744	3.98046228431646	4.04997353978538	3.75008921903439
MDFIC	2985.07366198027	-1.2773805723059	1.12942991928563e-22	1.0116251429363e-20	4.80733920425043	5.28634627958401	2.24236188814572	1.83829429501245	4.89926912032056	5.39356332160119	2.37743113136737	1.973710131161
MDGA2	1901.53545981375	-1.18424436886051	6.34575768386559e-20	4.22790013173803e-18	2.63604926320539	2.92547165893591	1.26287857015603	1.13725511196064	2.23674730157738	2.20476221369308	1.56760301134371	1.47015315020104
ME1	3033.8769327648	-0.782627194213139	3.89446394354613e-10	8.7787708060769e-09	6.72676118102125	7.62220093955235	4.1470566491933	4.09987681417868	8.80777497772291	9.1016734564834	5.39197927798213	5.15010831047373
ME3	843.655224535584	-0.509181603523814	0.000391510376498316	0.00249419587477142	2.58834164080563	2.46816979889731	1.88277267707129	1.64538712626949	2.88881316885667	3.0798676148816	2.05037783912679	2.20679017975703
MECOM	2538.85784052284	-0.544152600978243	5.31630449973359e-06	5.51403515022215e-05	2.78321966141028	3.00920231300363	2.06611022096962	1.89291579176714	1.77148387814084	2.06433482243352	1.59720852268708	1.5502299153503
MED21	1243.76731828538	-0.57581585786166	1.53406033359008e-05	0.000145499060391346	3.25511526931818	3.3662232788284	2.3601839408265	2.05878026104466	2.45578229145297	2.53936497906124	2.40654709653086	1.97974253187602
MED27	666.194702292136	-0.518574175663891	0.000800716767233345	0.00465193053128479	2.91188999129212	2.84531019893745	1.93081281158253	2.01893113799108	2.20612802679286	2.52601458843262	2.11583873863601	1.86137247310408
MED28	1401.25552612437	-0.493906751906201	0.000119639844818655	0.000888593575602584	4.77647264837281	4.23219950733616	3.31967263794774	3.03430001440765	6.24995418636543	5.6706848948416	3.06569525820437	3.08775590274319
MEIS1	3794.92939856399	-0.340614619936138	0.00179115795692528	0.00921118302943515	8.56966508748189	8.91047276790706	6.98341369317687	6.81557820675698	8.23507947603025	8.97962054888275	6.89300604629574	6.76759448352472
MEIS2	1460.91827737512	-0.445105246244007	0.000798294613108538	0.00463985158671808	2.44149222806744	2.55825863569009	1.98434210394699	1.68378948221488	2.01547887748516	2.06610916676781	2.11330594608684	2.24783861720395
MEIS3	1576.76497503904	-0.339914908442129	0.0125215518315604	0.0453685744184498	5.78105645869573	4.70779256806876	4.27713116705673	3.96032761955093	6.44183439835101	5.39304148232601	4.4018616535565	4.91770818650611
MELK	1284.07145971192	-0.625858906248054	0.000221069467662197	0.00152705033203842	3.70209962679795	4.17166021711916	2.96246220877734	2.08122858960625	2.83187319481995	3.46526111265383	2.62959989059672	2.52130995674713
MET	3357.79902821859	-0.719866539487738	9.80045668823891e-10	2.05505700323149e-08	4.21880071089264	3.81986314257518	2.6282007801235	2.21914795845376	5.00157915937837	5.40429829078012	3.16677434099299	2.92673371712565
METRN	389.847366411518	-0.535906909549608	0.0115953496787083	0.0427438278562359	1.10867515224011	0.773301232151761	0.704172983807097	0.552164585725586	1.27165604890991	0.967250414097289	0.753480257496152	0.848748113636585
METTL3	2009.06037256708	-0.447165110101922	0.000111439325507501	0.000834560840248587	7.5748502612251	7.47382630797854	5.74721805297649	5.26905747309007	6.97891956513964	7.6582539509985	5.90673370997601	5.51156418646702
METTL9	4397.55988819687	-0.430729546548359	3.89244060693085e-05	0.000332356434398609	9.86441722685582	9.98735274855555	7.65655963559194	7.06686972577656	9.66598637265338	9.14047857169392	8.4106443221155	8.35358955848171
MFF	2717.94801045817	-0.539347134524324	2.46051943199819e-06	2.75256619667291e-05	8.98941494020617	9.46397703047414	6.45758952920277	6.18950516306463	13.7845445522975	12.6263436218346	7.94580177259764	7.77902554768759
MFN1	4004.74571477839	-0.442558683902302	2.44889294410248e-05	0.000220955817671688	8.64312166080272	8.58849511866157	6.6029845500872	6.06893688534977	7.43479157892317	7.87825675645754	6.82334319433635	6.39551559683617
MFSD14A	2638.52428806765	-0.980003857753649	2.35668521983428e-16	1.13028963114392e-14	8.66128813473589	8.81254963451864	4.74133389824114	4.02414114936933	8.50222828376553	8.52229167325162	4.67898762858753	4.15589088317001
MGAT2	4110.63406758486	-0.549944780642291	2.50996058862751e-06	2.80092549184712e-05	11.7889260839637	11.871356938631	8.81462448685997	7.31502466254625	10.732930719963	10.7547316929927	9.95449977959504	9.54223452852568
MGLL	21256.5006092228	-0.589610247529737	6.53364455524757e-05	0.000526310557532599	38.0137943808941	32.0870806909658	27.0994199242835	18.9986269046209	22.670566242658	29.375073487562	28.4929470734927	27.3519405957681
MGST1	5403.62994261704	-0.769972118587409	1.87766861793102e-08	3.23097557983677e-07	18.2987917119733	19.8056520500726	12.6120214115227	9.5095916309654	22.7165189368888	23.7576223135391	16.8250850489104	13.9721700874114
MICAL2	15385.5464992325	-0.482725834087818	1.46911039112251e-05	0.000140124950916304	14.7214849435169	14.856127555427	10.0728967923836	10.9835286662257	8.30201620264282	8.77346093779145	6.76168564911188	6.83806551819583
MICAL3	3054.82535562641	-0.375733195982134	0.000727247999991816	0.00426725778737063	1.59389875684175	1.47382694548725	1.17432484144258	1.18126671506476	1.37564536207334	1.43907088717952	1.49750843649477	1.59554755948851
MICU3	2099.64180283512	-0.426961404233945	0.00129313261767672	0.00696809497136201	3.73395784907957	4.18905949401716	3.17468742606368	2.71394619892866	3.65383216454318	3.33313623291963	3.34621835949654	2.75036419950426
MID1	2602.53507310547	-1.40965148734461	4.72333781708945e-37	1.04726465534647e-34	2.88301211061409	2.8177036415393	1.06964421719751	1.03418798414163	2.384955951	2.56833076949359	1.61445582464253	1.48576867344066
MINPP1	1616.75616974918	-0.409054740597713	0.00287126286354496	0.0136354740974177	3.66436773751296	3.66659689095638	3.07780571787454	2.44208099138673	3.59069148129094	3.20251558362148	2.93506756071187	2.81101414452383
MIOS	1354.52655553486	-0.516270744367702	5.34723741441386e-05	0.000442332636268792	3.11082970794066	3.19194034277058	2.30130206304394	2.08672957558694	2.66807962634436	2.70632921957483	2.14003811924426	2.04329443914745
MIR100HG	13562.9161002235	-0.77550189486999	3.88880711399731e-14	1.48158073850179e-12	14.4787541468744	14.6797797310682	9.05529088958126	7.90524554074503	11.2501724450852	10.9838895726886	10.5113328920514	9.19611418070575
MIR155HG	404.042112900509	-1.10651484418046	1.0292296787004e-06	1.24067124816603e-05	2.60621397728086	2.42102260392129	1.37567343786584	0.798773303148279	1.26492294133834	1.71636027960335	1.23705713917279	0.95181448771086
MIR193BHG	234.136486036941	-0.599158235642358	0.00504532718419581	0.0218571589257682	2.2527190823431	2.35523606497936	1.46157686214898	1.45950761459883	1.62324103075679	1.76880274509752	2.08817268907727	1.76204119927202
MIR3142HG	114.227959662988	-0.877434612966356	0.00152374024932286	0.00803140563994222	0.404632950299886	0.463845380174554	0.239289904108361	0.184109884070923	0.383821164665244	0.218284301305897	0.124550698301959	0.10277867219604
MIR31HG	380.371507008428	-0.784749288487627	0.000104207527518328	0.000785622524908238	1.59333342409927	1.38804395940457	0.973647002750036	0.697497002264411	0.875218535768969	0.973351949013809	0.838281864688747	0.828766020309112
MIR503HG	335.712733267186	-0.6223412524109	0.00159281078206004	0.00832088289971496	3.65608905166205	3.21421771684453	2.41786312777176	1.9292415349239	5.12813780839244	5.29570772831634	3.63447177640425	3.09841228694355
MIR924HG	25.8467135478974	-0.967639161987454	0.00721447675374876	0.0291271039087917	0.134776066480982	0.110603665222142	0.0381169758756682	0.0324240466141348	0.0900849982477103	0.102271789858799	0.0672353327116772	0.073976389427238
MIS18A	252.7671176308	-0.589956594984422	0.00584656193592183	0.0244661974577174	1.32109477084245	1.24703696445799	0.926086961794295	0.730187591468394	0.960291172282053	1.24576963522272	0.967230120486254	0.850920757380028
MIS18BP1	1008.26743682272	-0.680358865429692	8.79893858461438e-06	8.77622745994908e-05	1.69817376783356	1.7260518371591	1.19349408735311	0.921890151697868	1.27295137628585	1.48488779468962	1.05447014683403	0.878310248199511
MITF	2304.10902401032	-0.581215320741119	3.45958738364978e-06	3.72836010867436e-05	2.92548358875763	3.0356955801458	1.90065674121312	2.04247346503043	3.58074905845401	3.5195685434384	2.86452301666482	2.65363645745888
MKI67	4189.25776262749	-0.80688720648977	6.52878694524069e-15	2.71697979798093e-13	2.89320293630199	2.71664308449505	1.63812563566395	1.54545314179199	1.29653703610092	2.03696679547074	1.38149102673591	1.29337163659092
MLEC	8340.52214799426	-2.10595655749564	1.37254214303946e-81	4.64090812115218e-78	13.6937424322638	13.7429263349457	3.37348667152767	2.82962372652846	13.0672527947138	13.0240421925966	3.35201668431933	3.19276467304417
MMACHC	181.544078612381	-0.739487414020637	0.00149504234025978	0.0079047879796769	0.515929491735316	0.53206806273961	0.316578645973075	0.276483722874347	0.44802893523552	0.490341447344983	0.392843464137514	0.321651304753239
MMD	1757.56548836429	-0.709577647344574	8.79669652147549e-09	1.58633760603941e-07	5.11545891029922	5.41897821920114	3.25585418553609	3.1267525617618	7.34157733909016	5.6236306288501	2.13167856910192	1.90781363781858
MME	22187.4020404888	-1.45869314258734	6.52129822121757e-17	3.30339170194635e-15	36.5658783425745	35.2647260932047	15.5223457259523	9.20558685248041	28.7335546498753	31.5812052389199	20.141429577146	18.7222867811345
MMP1	7406.82848289033	-1.52787549646532	4.60862791832385e-38	1.09353846658474e-35	33.9497372166257	36.5507722403906	13.0709344603269	10.8667142786053	27.4673972957905	25.0355088205617	13.0508524892267	13.0778122099602
MNAT1	1669.40110319256	-0.467341649865812	0.000207434419824789	0.00144392718895022	8.88142589419248	9.51524078327548	6.70634611947945	6.53709002724371	7.89872560022622	8.7806162330077	7.21853700050272	6.9192663145639
MOB1A	9113.73541691229	-1.48160155519764	4.81909060007102e-32	8.46470134622865e-30	16.6802062746395	17.9224298873343	6.76730939604694	5.33551605266136	15.9102007848909	16.8647313560191	7.52628159825212	6.45087122669711
MOB1B	4176.81429032817	-0.571457995275236	2.19232651857101e-07	3.06948407491438e-06	3.8350234935702	3.8523386488425	2.52631143430456	2.61423843949886	3.59084545485381	3.58090748300261	2.55597472982429	2.25504751560237
MORN2	391.508168758652	-0.456681286636849	0.0104737338578132	0.0393930062366305	3.99930996212931	4.06815090864434	2.98192034350419	2.80614399409353	3.94655447707969	4.9731225530224	3.37329010016468	3.2240586045997
MOSPD2	1454.08184924313	-0.831766663496295	3.55219122822859e-11	9.15112121176983e-10	2.94812249226472	2.93925026306648	1.72992288110623	1.54280270694129	3.05706027466958	3.12800921968701	1.76480231581496	1.68982132787451
MPP1	808.441875212522	-1.03890397997341	2.01217469220514e-12	6.11565454203921e-11	3.4562203539793	3.09247523528167	1.65139441333226	1.45480667418136	2.61287334544329	3.29381508148949	2.17518695637136	1.97901573019807
MPP4	649.269538897885	-0.91111011057105	6.33186965031897e-08	9.86619090098665e-07	2.127140772158	2.43133824613662	1.29107514576285	1.07375705391866	0.915915947114885	1.45261253895423	1.24874996295911	1.3030990154688
MPP6	922.322575030651	-0.834700065687595	4.74252604189602e-09	8.83507778466166e-08	0.926509366556581	0.989725892889239	0.549092489343722	0.507740530882167	0.937209710339522	0.959264031481925	0.599883710109622	0.568914690495715
MPZL1	8881.63830449456	-0.447975814500543	9.06180516845562e-06	8.99859874474025e-05	13.3299930430115	13.5072322258287	9.83715541919323	9.80208362064464	15.5301351247816	14.0344400700311	12.6793356683959	11.9384664887752
MRPL13	1027.72795820517	-0.614886361811475	5.61374425419216e-05	0.000460435967483013	7.22736342487338	7.51738182128137	5.37389074739931	4.18013780836189	7.52043524488731	7.65468093285894	5.46205305580431	4.93056245491485
MRPL19	2478.23238804395	-0.986482725151356	2.3719337403908e-18	1.3651235676079e-16	2.79442230783096	2.74655366618007	1.38364411398189	1.37433786835017	2.3356776123419	2.35286472590963	1.4036181032864	1.16342136166467
MRPL30	2009.47612623986	-0.325967581967733	0.00882850559666267	0.0342430565514375	3.11924874181841	3.34031183265827	2.74233826613074	2.41883580430934	3.07515627603011	3.31277352838594	2.69500143025552	2.54295265669816
MRPL50	801.414056194602	-0.402973764563951	0.00853439936979951	0.0333220991560445	5.77575233571514	5.96314021931332	4.87157683329716	3.99016395675241	5.52390621400121	5.46068556704319	4.29364439582181	3.84364159743169
MRPS14	1275.9771522921	-0.497945724250081	0.000620837887086769	0.00371541257648166	4.10363444816635	4.66781884957732	3.35348166910913	2.83323185945203	3.77660152761224	3.99456902151413	3.80049446374316	3.06483927864495
MRPS15	1481.50614946605	-0.420069609772997	0.000871432654479397	0.00501964508170095	11.3739730644322	11.7092509094506	8.58418435277021	8.57830415860767	11.785134181124	12.1883090985658	9.35330570419316	9.34722024787054
MRPS28	573.836431270139	-0.799182382642033	1.21894172541196e-05	0.000118265328810594	6.33685472447283	7.29602648669561	4.34715633432502	3.30498360975233	6.87202514836547	7.22427772353238	4.73909241162802	4.27770390156931
MSC-AS1	985.442184654045	-0.544151999539869	6.02434273135123e-05	0.000488777657117729	1.57334876640382	1.55546046252864	1.11558267807507	1.01485760074963	2.12812767571558	1.90548506969022	1.21345069952987	1.15525458079044
MSH6	3095.41996914546	-0.440676656322018	0.000102038315819741	0.000770127355726557	5.1149058597655	5.32385602114473	4.05825847195341	3.63016499848278	5.03675663719155	5.09847363563105	4.35432466957109	4.15625900206601
MSMO1	3601.98682787309	-0.899855066100881	2.01082708937736e-14	7.86024172943029e-13	13.4712987977757	14.2110155135811	7.92577996570046	6.78157881855618	11.5804426979924	11.9849808624751	10.8678310613954	9.04750113093681
MSN	25812.6742169227	-0.832045364750269	8.47353928764917e-16	3.82015396218183e-14	52.8511309601375	56.508683281404	30.7146975656269	30.2892521433804	40.9917556996256	46.7362758787609	33.8236401886949	30.9053137298404
MSX2	731.064805410445	-0.433547311109943	0.00621386920104627	0.025752431462949	2.41769513498014	2.58115292643413	2.02616125326536	1.66277373309909	4.31323870858285	3.83084621307068	2.89727036512013	2.58657848147912
MTA3	1278.09918058984	-0.354783927952868	0.0102318984623263	0.0386810562001596	1.38155697510706	1.42343870404333	1.04264063214854	1.13299223727296	1.80180821700445	1.62853005555949	1.26325230856589	1.20663716866785
MTFR2	107.10788939061	-0.694276151622906	0.0138302799600512	0.0491343673390313	0.494479527994416	0.443881106632473	0.308318238470346	0.221043295259274	0.306715687721969	0.36852730555411	0.356694488094814	0.255460372096608
MTMR1	3578.95631677178	-0.37681372852489	0.000585555411176153	0.00353713128010606	5.59603783093197	5.45429877767111	4.54082504283629	3.97634586481822	5.47034996051007	5.78777735983793	5.67128630686899	5.3424984278523
MTMR4	6876.17075984165	-1.19447370923074	1.44429808784149e-25	1.60115833098821e-23	10.9110068250826	10.7086283769936	5.12447396291761	4.19554833695707	11.5204695415639	11.3173320193148	7.25609847045248	6.96634902001
MTRR	943.320211483777	-0.447242532891265	0.00104533215141317	0.00586157435649381	2.17835505958639	2.16009159398368	1.6377355110776	1.52620552506065	1.97752249986045	2.22026482028881	1.62410636157543	1.47485940284144
MTX1	469.434182178172	-0.438374108741443	0.00939950921207031	0.0360647835725535	1.42109693923847	1.29614635402049	0.997253888256628	0.975095303754149	1.41118938770636	1.41784889901103	1.1428214301545	1.10632756181808
MUL1	998.586413816309	-0.361173027689349	0.00937960763605001	0.0360088541804077	3.182592300328	2.82582690196673	2.45637219709608	2.20046313687229	2.93344901275283	2.86250117970393	2.24713174027543	2.20234503027578
MXRA5	7979.75836497994	-1.04004818246124	1.79476890082252e-18	1.05083330665041e-16	7.51768690375925	6.93774527249736	3.25320903735313	3.64262620320077	8.5817165807957	7.79227209834667	4.13003706180698	4.47583592359376
MYBL1	2671.55691803832	-0.426295274773242	0.00172630051483411	0.00893540545852712	3.91666402973577	3.83427814662512	3.27152437465869	2.49097651226116	1.30829096538381	1.82956760536869	2.11450718448117	1.77299038237906
MYBL2	503.165468223546	-0.849490446481515	6.59198096629827e-06	6.71946799715361e-05	1.61330799071022	1.47982796314466	0.972497608126383	0.693190591336102	0.821846379764653	0.966029758800432	0.826241614734857	0.78879844828341
MYC	2182.69615512708	-0.496778858816018	5.20517591039135e-05	0.000432166999312726	7.57001144735377	6.63252299594703	5.33820782698543	4.67951005032604	8.75015767628814	10.5233232682642	6.48011067606704	8.01912320941644
MYLK	101724.890953851	-0.532735800078322	1.38187769834163e-08	2.42411100779124e-07	98.2164199164276	96.4706923320207	67.2515317252329	67.0529026620382	86.651277251198	78.4685769269913	70.1870608515663	68.3861566963784
MYO10	16710.2841505317	-0.323976209897453	0.00575996358718422	0.0241861246559039	11.1190515071514	10.2262533945513	7.98721646679108	8.98931488474397	10.5678013147727	10.9116394265657	8.03430461180427	8.00215888471118
MYO18A	4513.56951363204	-0.406409929268115	0.00112767064791285	0.00623793272516211	4.78310795272785	4.14496541932317	3.17650010910667	3.50369218154479	4.0034319694963	4.13323303425006	3.71613753661084	3.77885975248479
MYO1C	19177.9752474277	-0.375696733841141	0.000793774864755206	0.00462351638493289	30.2534492181055	25.6186815939462	21.1646871378214	21.7216500641312	27.8179928516359	28.7267410996996	25.002715419856	24.2696127891211
MYO1D	195.909307358232	-1.20049505955167	1.7801797776407e-05	0.000165250044561362	0.316307896460435	0.284085693169814	0.151404691168147	0.0726876624488863	0.313374065214038	0.345435147495205	0.161780309850112	0.139857539953817
MYPN	799.737981485111	-1.50794282937158	8.06790662176435e-21	5.86658263760015e-19	1.20374374569472	1.22740512344001	0.463886243008642	0.356222069570176	0.706589904413609	0.892657791869216	0.57609284844924	0.485380916495015
MZT1	907.67116956427	-0.741283136287801	6.83843757687352e-06	6.94890069325427e-05	2.9371617839197	3.27352686648507	2.08098881781799	1.57986453517574	1.94374742438022	2.43420907578966	1.90254806311666	1.20997171904753
N4BP2	664.524427518241	-0.581433496807733	0.000911896336613569	0.00521568865278721	0.511329116027519	0.569239264953063	0.320590102132264	0.381557706792774	0.953087278745009	0.766135386426764	0.439954885413245	0.442226969019604
NACAD	307.856611341662	-0.680180272745117	0.000534865124651578	0.00325858144635703	0.57005603290985	0.490460620481847	0.32468237356438	0.311508084339865	0.672739099957683	0.613597116471817	0.371820851704631	0.446190977912465
NAE1	1543.78076598118	-1.01585867503477	1.00973825709952e-12	3.26715548499305e-11	7.00544111821721	7.18719642409169	3.88347573542528	3.0156793686161	7.66799939219996	8.02532015358971	3.8739808082785	3.70872794088328
NAGA	2278.9665689324	-0.579973830981787	3.50714336478427e-07	4.69644693155517e-06	4.88459777218832	4.74450606505038	3.37022425866843	3.04621000842555	5.04969596017619	5.04245822076622	3.73354590554057	3.53979720258385
NAV2	6458.81035747505	-1.10898252665671	1.24077697081984e-18	7.42544625236208e-17	5.40146760470104	4.50990751109307	2.47857777014435	2.03256810949807	4.50254015152406	5.61703547666376	3.93513683553282	4.11262948733042
NBPF10	291.738038738496	-0.559705661767383	0.00579964851984504	0.0243075428979133	0.196539191393349	0.207884154103072	0.127364319091205	0.13725273474083	0.241109504966012	0.23401188750201	0.165613285171011	0.15120782417846
NBPF14	662.607541960727	-0.643038921143614	0.000125971498332421	0.000930510385006005	0.548398244947341	0.51435276239061	0.303100545203924	0.35641962617154	0.577934944055909	0.646874805558715	0.379125900396728	0.414925837960388
NBPF3	1865.52191314443	-0.714867182945369	8.82557932078941e-09	1.58942690164683e-07	3.37729796711214	3.44256241762121	2.00509542973374	2.09624982563719	4.49221684295916	4.24659894177877	3.13341285366185	3.04277070366377
NCAPD2	3181.33675827243	-0.517758983690156	2.65282189123976e-06	2.93852711539867e-05	5.0388662818104	5.19357519520541	3.61185356301056	3.50975418130318	3.79259117233738	5.04556743726299	3.54111681564289	3.35985080944551
NCAPG	1500.90781288061	-0.817809842166712	1.07781021409036e-05	0.000105556720822391	2.66040041266709	2.68598510547491	1.83314597415	1.11782060900088	1.32360568498619	2.14763927858195	1.4597226516269	1.32578911784044
NCAPG2	2169.65575097554	-0.716336094142715	2.9447746859124e-08	4.88089186604966e-07	2.83796444891491	2.90168006903613	1.91540321884247	1.5547351220482	1.86246747750783	2.50216725293841	1.86836122739972	1.7034342284659
NCAPH	573.746245042598	-0.973533214305846	5.07274918759557e-07	6.56544811121819e-06	0.887635445373293	0.782757072939083	0.489242999190358	0.328197932281261	0.430302093065853	0.63183471704732	0.441385145063488	0.38992510447131
NCEH1	3061.23654968734	-2.04073393531301	1.11439714482272e-43	3.5051677636575e-41	7.41591910060402	7.68470406868135	2.03354826967639	1.45689119979139	7.18069086820417	7.6750915550034	1.74489322434571	1.62109371052526
NCK1	2532.21124021526	-0.428437655748828	0.000338204267456624	0.00220763162034307	4.00867855046031	4.32110388274513	3.24168517526295	2.94269399954645	4.58609552994103	4.49067094933107	3.58373875914171	3.3732721538238
NCK2	1315.40718863952	-0.726900984875321	4.63097657004323e-07	6.05744275723739e-06	4.5269862796756	3.60606516831404	2.43776029044776	2.37529544631789	5.62760004501534	4.39219498831995	2.77467386160953	2.97763982190251
NCSTN	3347.61638305147	-1.54174421916864	5.12083598238771e-47	2.30864355539312e-44	10.809041741261	10.5360225541172	3.7419211745247	3.45502288668837	11.9948462360379	11.6524978524838	4.36231325070933	4.14635376546762
NDC1	1909.02470653774	-0.722776797606859	5.5786635076958e-07	7.1315145502444e-06	3.25295629642762	3.23867080029053	2.22943799985228	1.66547696827081	2.10047969758808	2.78194197931551	1.69745177594617	1.56084176699584
NDC80	581.501484924921	-0.777481032769516	2.58084759019383e-05	0.000230706964027571	2.23266349719072	2.24431431811954	1.49875683954427	1.0534972301404	1.17899695395438	1.65707282159739	1.29774717001457	1.04812373362677
NDFIP1	3059.40789025965	-0.83586161179576	3.46758969110137e-12	1.01294061710899e-10	6.82403888534781	7.51502758249535	4.00173613893088	3.94137603956539	7.27407334296752	6.8847725780279	4.08922414975485	3.84152788566149
NDRG3	1785.77062917973	-0.593908813096925	1.05143353962723e-06	1.2651813721938e-05	4.71186939702048	4.6352825279052	3.02799850218603	3.10478427515899	4.39527327971691	4.40405248294001	3.66814986467345	3.60652838058396
NDRG4	541.320451849428	-1.58290629619891	9.21433838027198e-16	4.14032978714879e-14	1.31467116173775	1.21643293022624	0.318498137270651	0.438104778698189	1.25801119329827	1.22685095948756	0.56924667331095	0.508117209668993
NDST1	8918.71786765182	-1.16718399916097	9.90260421246284e-28	1.25170768199589e-25	10.4095869614848	9.34072308955809	4.26373215920972	4.39116234929426	10.1254916452693	10.3586561626386	5.54775620712801	5.58316961631664
NDUFA9	2080.42942693157	-0.752618663515549	2.58360562938335e-09	5.06052463318482e-08	10.4927937963408	10.8475799183018	6.84943183568346	5.72611449393861	9.82328700059402	10.0393218997221	7.56453905498079	6.80288915469917
NDUFB4	2086.84582860966	-0.429491872962417	0.000343917418000656	0.00223904478110609	9.77979408331807	10.3637702223555	7.76403704253129	7.17098456481893	10.5880940716096	11.2297874230004	8.33787084940399	8.06438869387373
NECAP1	1494.39309438259	-0.980099045158751	8.14274381002596e-15	3.36790856362694e-13	5.02944304504452	5.04451316886207	2.67916100889855	2.3590395404146	4.36203721079388	4.2082717688271	2.44072295905032	2.38628893613835
NEDD1	1834.94882802974	-0.915982825943174	4.05887825018714e-12	1.17551024269338e-10	3.73021303052383	3.97579572015408	2.20335901454976	1.83168652407068	3.53220860035127	3.74372541486551	2.39533666046218	2.22046881240732
NEDD4	26572.486881344	-0.514410536269572	8.89930860380023e-07	1.09023925761633e-05	25.453435099454	27.48549238309	19.3471680480909	17.6706183204767	18.8712655104721	19.4967740013032	20.6758501168153	19.4065301354291
NEIL3	323.066534581271	-0.906083407525334	6.07411008741008e-05	0.000491930173246835	1.16729369692558	1.1781032438304	0.730621214292557	0.456149277145099	0.653834066965533	1.15261710385881	0.67056187778557	0.663984548504154
NEK2	421.437267619672	-1.39507503320939	1.97823029831611e-09	3.93464188010668e-08	1.29526037181381	1.22093631604693	0.558245659004173	0.305999517870192	0.668732254371497	0.886451488398179	0.436269825328916	0.464903798399822
NEK9	2366.97758475464	-0.32822250142031	0.00493080607010917	0.0214918311628187	2.6902914770181	2.77941342459852	2.17254030027496	2.17616924324441	2.6490166521435	2.45770945176989	2.24441540783469	2.00418952863882
NEMP1	1625.18808283591	-0.392029059933955	0.0054063732235509	0.0230569525339639	2.15300490664681	2.15844082076388	1.85033250757389	1.43549346631405	1.82497098728951	2.14663888320626	1.62989123708128	1.727203383145
NETO1	239.033936002102	-0.826034569595886	0.000118694596162007	0.000882057369830296	0.242950837839476	0.257459100034629	0.130170428687847	0.135541101279826	0.304802751394017	0.279174962871465	0.147805851319063	0.180566548933289
NEURL1B	543.665727318205	-0.780109011177904	2.32828505065468e-06	2.63074814620757e-05	0.759167644003519	0.660245021510694	0.423887104845526	0.381288607048998	0.54037290972591	0.590910376298152	0.4489378849459	0.478743574982655
NEXN-AS1	134.326901015507	-0.674141092480364	0.00893864479023049	0.0346404500824835	0.526765811862776	0.448961445610124	0.277709923616161	0.283919531780061	0.293662944811371	0.379041571576799	0.251927154157017	0.311833720092173
NF2	7675.32498516138	-0.543109666319415	1.41893793027421e-07	2.07696271720332e-06	8.98387092678035	8.28130768512829	6.27122687607484	5.55210849101989	6.88967412831031	8.32402538507906	7.59539834585016	6.87773848614751
NFATC4	2084.15302213989	-1.06808560278278	2.76536085329291e-16	1.31460390050103e-14	3.13034579079785	2.80150470362057	1.31139542614069	1.44333217981404	4.09521503152011	3.2743765049223	1.60190933103074	1.5847374118767
NFE2L2	4500.57194290323	-0.552488217197553	1.61317794105423e-05	0.000151831813867491	9.46580905651435	10.168651045592	6.23115183332175	7.0203894195651	17.8215795497718	14.69319767897	7.97704825343937	8.07837463888957
NFE2L3	5430.22790946296	-0.718228745774167	1.20716046169515e-12	3.86892067403482e-11	11.9925182033822	11.9213087316573	7.37980384050417	7.0821850482507	9.35887073504473	8.72340133930612	8.37578267368083	8.45509254711734
NFIA	128.053284828243	-0.880920711607809	0.00106788870651279	0.00597072953930774	0.0995517945740897	0.125699832671801	0.054432902461046	0.0546578152101431	0.147428058770533	0.150494081814613	0.0667053924458664	0.0726288032983754
NFIL3	4177.67448094884	-0.364829343440355	0.00227672666218742	0.0112711303462975	12.2578490210342	12.9019032582837	10.677152620525	8.89120469338054	11.8367497697573	11.213944920591	10.3502087635434	10.4572651345095
NFKBIA	3636.3462800404	-0.719545398260263	9.11266880955736e-12	2.52042629139598e-10	19.039214005604	18.8964260225161	11.8667635279265	11.0503077897065	17.6502783963052	16.4008412188856	12.3733607569002	13.8310847167735
NFU1	895.88882082424	-0.399271219821923	0.0050204301317764	0.0217727356542736	5.4737353621905	5.74550325705419	4.24950010612537	4.20038989620083	6.01295785154807	6.39654891346125	4.35875287148022	4.02943373076855
NHP2	1677.85843577118	-0.361187819422661	0.00328707453357055	0.0153091195132719	14.9963586243217	14.0431933608572	12.0245280770232	10.566887549002	15.2734647242444	15.9375302892819	12.6478094805577	12.3356496619502
NHSL2	38.6481665495854	-1.35874724961727	9.86024494446454e-05	0.000747951838888855	0.122080869129213	0.104019636392457	0.024722719837188	0.024687718306457	0.0336552458923909	0.0545089272213592	0.0268539161918037	0.0359858863739986
NID1	5534.43488352697	-1.48240206283435	2.81195822218461e-22	2.45366031968044e-20	9.19082463818435	9.19172116115809	2.68878684633374	3.55887249415572	13.8286149150968	11.2919373246454	4.44796995570012	4.46400790139015
NID2	19538.4055040264	-0.519278844190658	5.3608351597101e-08	8.46036120596022e-07	30.7331079954503	29.1394512113509	20.9305162458001	20.7419300955154	50.334776752581	42.4764789113668	37.7696413557637	36.9671136661266
NIF3L1	642.124239217043	-0.473881857983419	0.00218190398173421	0.0108853748996515	2.75830731841807	2.88871559314716	2.09034858761327	1.93953241653699	2.31650363068762	2.34830544852294	1.79023733593793	1.78756788331254
NIFK	1256.8375595362	-0.524406184620594	0.000156621611127316	0.00112675919707284	5.32776459810668	5.87896274837416	4.12795736765068	3.6275292362981	5.9069821834892	5.97090053992036	4.00862624333528	3.68586579979553
NINJ1	1106.9382904387	-0.97155693161769	5.44690752526383e-12	1.541201344753e-10	8.22548684378613	6.91553757868191	3.90410538318872	3.63158456232568	11.1246154210801	8.50347775024355	4.89306314757698	4.9336481666591
NIPSNAP1	2576.35240827024	-0.60686870331824	1.30995527567799e-07	1.92997223350161e-06	9.15251996207524	9.11856017685258	6.37649805294839	5.5796584068604	10.1515608102291	9.92684459482005	8.02911954621617	7.68032320587781
NIT2	1176.77525061167	-0.536347816089409	6.43790205345952e-05	0.000519526403777088	7.20682463242156	7.19830050757715	5.31558705947716	4.57221981714675	7.45650044898022	7.57889134273878	5.88200717142157	5.7222400866184
NLGN1	701.762538869274	-0.702152736026866	9.66496137814861e-05	0.000736857963018376	1.07909255266548	1.25071970071401	0.623111490746697	0.758667007847345	1.31052894810839	1.39140455056778	0.856975271639801	0.911001590326551
NLGN2	733.538117154011	-0.57903104651123	0.000206077998837331	0.00143892872187657	1.30793123319588	1.19403168929103	0.780911219563275	0.856027237060766	1.44039436005791	1.38497124338179	0.894507780938761	0.88028480059884
NLK	1353.22438247567	-0.455856253570925	0.00043206857155572	0.0027230789516734	2.94153014530185	2.86932573761035	2.26939893794572	1.95735506978018	2.59559781909903	2.56615422270413	2.20325890444501	2.03883745323753
NLN	1452.98632533352	-1.40709578525374	5.93660681360902e-24	5.69451114567816e-22	1.53340487803768	1.68239023891697	0.641477080428118	0.538175726490279	1.76954229369426	1.83639889805634	0.637738115413578	0.562372025756293
NLRC5	1865.48110297355	-0.432337379210846	0.00257072020984705	0.0124823655345904	2.28320577072887	1.84715133101655	1.67492430027099	1.36656038329932	1.82348221439152	1.80461290933672	1.75072543370311	1.67502586572473
NLRP3	260.077430184874	-0.778338706140025	0.000924566863067556	0.00527850013633968	0.479480421791942	0.497472484672028	0.331758550034106	0.210758968798291	0.280544926111385	0.254865831012438	0.366780332240943	0.353342175973927
NLRX1	483.98850153785	-0.888341204608431	4.86717837839915e-07	6.31940400824253e-06	1.07820416496924	0.887871333946059	0.504099567781016	0.512628842990825	1.19582259088085	1.08094464179242	0.662134567364728	0.624937141338899
NMD3	2744.77192851269	-1.10866148476734	4.57660623494222e-22	3.91763286883504e-20	6.96448712201389	7.09574181316617	3.17854371913253	3.23176920172444	7.02297107381101	6.69067545167246	3.23324820143672	3.08378763829773
NME4	1510.5390361814	-0.836623725226519	4.53310978565274e-09	8.50351038154691e-08	6.82100721385462	5.56232003804858	3.69087601489249	3.11750104927295	6.75212644785781	7.31139930722723	4.36301035895016	4.60396849395667
NNT	3099.74337590763	-1.05449583205457	5.37248696044511e-20	3.63314430700101e-18	5.54703626521126	5.82040693375851	2.6813702791771	2.70817850811295	5.30188100207054	5.33685815668604	3.12307149237881	2.89785001194107
NOL10	1401.01027278675	-0.491238217403263	7.56630097856987e-05	0.000598445735293319	3.07785717650192	3.07185238214559	2.24855893311659	2.10606704387665	2.91501044541412	3.1276984689333	2.1676379105851	2.24566436433953
NOMO2	914.526932604646	-0.428806632254503	0.0018229617100592	0.00934630672045134	0.552903832095292	0.52939810437405	0.40408654862597	0.393551137596405	0.562092262332384	0.532001710096825	0.369786425454701	0.392638765550827
NOTCH2	26237.9772743888	-1.38538997291941	1.54984954988103e-45	5.98906147489739e-43	21.3340976631527	20.8715772759743	8.4909164147359	7.47374459242174	20.7815792699486	20.846443515477	11.3568749881025	10.8783834209064
NOTCH2NL	939.374194312331	-0.376774918075693	0.00597283456375202	0.024894479961401	1.34377925571102	1.27613976181702	1.05208453707147	0.957928913498533	1.52143409711504	1.56185306154394	1.13022038624423	1.35239881678175
NPTX1	18512.5591197283	-1.31033771744235	3.3818390272038e-19	2.08855583757677e-17	33.3734262996833	30.889806412413	14.8813057820003	10.2380544484198	12.1532910624413	9.90329773567092	12.777705849119	12.082940098028
NQO1	6279.55515843579	-0.904500314289065	1.2315184885423e-15	5.47904195971534e-14	20.5178702385281	20.4637722481689	10.3796660649332	11.2180691487399	35.4954959195246	31.7562558845441	13.5305928248141	12.4628186002993
NR1D2	4773.69285595413	-0.328338034408318	0.0037390741286942	0.0171136980001994	6.21951031657726	6.45950707704197	4.92028440513828	5.15609417972074	7.01322558260723	6.96305302035233	5.9572975051227	5.79810190917189
NR2F2	3271.74421786706	-0.470287678702013	9.61224670825775e-06	9.49639420958262e-05	4.16923551113274	3.99771255849187	2.9942960570391	2.8835521657786	2.62483858812458	2.9781169683908	2.74433500168542	2.57563651570149
NR3C2	278.604693439359	-0.570559814467912	0.0108980976422543	0.0406723980716031	0.365422939293791	0.383608670295747	0.292925247145196	0.19859925742825	0.388267869829765	0.369054192906363	0.359397818650568	0.318659965952297
NRAV	175.582881025785	-0.936290739069601	9.78111019724532e-05	0.000744035519784831	0.783728718584075	0.858872475550417	0.373882591342743	0.406859323887593	0.774873449345038	0.69953191682361	0.572723110852922	0.425604717717321
NRDC	9037.27616385432	-0.354783728651514	0.0013022047672377	0.00701127367710585	16.1330975117743	16.4632282196568	12.298516242559	13.1256481891001	17.4346056530802	17.2928474716322	13.2036555313572	13.0345782002925
NREP	6048.18373502387	-0.580969151150717	3.90040380204446e-08	6.30262382588426e-07	14.0038554220892	13.9222534884043	9.95749326321343	8.67693613935176	8.91695147396962	9.87180069506262	11.1756841801206	10.6607238051464
NRIP1	8141.44024717966	-0.322268835029098	0.00540751596582133	0.0230569525339639	7.63542053629843	8.05940367900883	6.87511943389367	5.70653406699817	6.05834680071076	7.32817968096577	8.15564763758057	7.70909412993352
NRIP3	1355.24940729866	-1.35510793257487	1.94890669996224e-20	1.35653695037552e-18	3.13566747573713	3.62111337741012	1.38221487797116	1.18001330600994	2.58357247418771	3.46634090768456	1.47404067439066	1.44900208886446
NRP1	11511.9079746038	-0.792771481538236	8.58807039451037e-08	1.30363245887489e-06	16.1599620347315	16.4182004053195	10.9872666352413	7.54426698868822	9.60194579428949	12.936836306438	8.24507089682457	7.70324081954069
NSMAF	2857.86794168634	-0.449675583644984	3.41551714405204e-05	0.00029650108712005	5.77525361562201	5.67538184735246	4.3349308540667	4.03588578403652	6.05091643661039	6.22488901605994	4.51596725456137	4.53902297298747
NT5DC2	1576.08614190934	-1.50010781435429	2.65622692291501e-30	3.95580215998027e-28	6.46883764675693	6.57391943071471	2.14610597896507	2.30081584334013	5.95972727237936	6.57357204944025	2.39517325921022	2.36390220212811
NT5E	22217.619174106	-0.354141470681428	0.00481137607637923	0.021086798908953	40.9621129256856	39.5144395356245	35.8311337730008	27.1556089530569	55.707361783074	53.850049893599	53.3643100436321	51.8118130908495
NTN4	9997.55882825716	-1.05095333542909	2.81355098278989e-21	2.11407094679074e-19	20.4219714839613	22.031289946631	10.8258487763882	9.45331919870535	29.0771625563108	26.4463951904256	18.1254513342879	17.1917157469091
NUAK2	976.59588934248	-0.433733324115543	0.0100739128589589	0.0382079841327592	2.32541145548413	1.99596476256116	1.39159924449169	1.73307351535739	2.19917374383897	2.09714029277637	1.86126650165413	2.05831626853845
NUCKS1	16096.0432105583	-0.321933404883417	0.00129315477841912	0.00696809497136201	17.8274758661803	18.4295809712288	15.2572486693151	13.8065743810739	23.7971569510016	25.4518646631844	16.8336511704704	15.2668163314213
NUDCD2	817.755494728815	-0.396479060262666	0.0134615334410668	0.0480515280523698	0.654797222400255	0.718730161015176	0.580339967798149	0.461638656936465	0.594780421051061	0.624349326451044	0.554169293390348	0.487917824204954
NUDT1	448.540979552996	-0.647144533867664	0.000230863492308116	0.0015833817106832	4.4175015910856	4.21910014281091	2.95143251654418	2.45965681866	4.07135602080595	4.75063978358373	3.59027048709085	3.6958621813311
NUDT11	703.266690995466	-0.777059891381348	8.69345322331513e-06	8.68382236671619e-05	2.20717048254814	2.70073054531317	1.32827868307229	1.44514236996709	2.66386152372643	2.27514646229452	1.85183392166486	1.65168910413132
NUDT15	846.620492551513	-0.681214352876606	1.36806156688374e-05	0.000131041308017724	1.42634242031229	1.47497048210295	1.00222857641331	0.787354724177754	1.06344199151883	1.26592511214065	1.00584682389253	0.890105884535811
NUDT19	535.267830511127	-0.484310653312813	0.00570739553861053	0.0240175870129768	1.36538557677296	1.40507204953176	1.10636296075447	0.858946211864142	1.4445638037851	1.53483218531972	0.821984234395237	0.818582491753775
NUDT4	1762.943836987	-0.429076354052801	0.00313632666923753	0.0147492413774122	2.67805570298823	2.59493677315361	1.75529746114931	2.10541021910503	3.28984854558024	3.11556591535058	2.05718043206059	1.86911092404404
NUF2	536.937801795459	-0.897038172382759	0.000126163078469496	0.00093141683204145	2.39293234216531	2.32146595807996	1.56807672707309	0.814123746324193	1.23301678677513	1.67993827987397	1.14976137331437	1.01812376987359
NUMBL	985.009424434965	-0.421639977420131	0.00860872394200482	0.0335155415416278	2.22251399697011	1.86322311551088	1.38014549624362	1.6095485992179	3.06916479246448	2.38278895062838	1.69644875783066	1.9182567576495
NUP107	1851.52891669324	-0.332565972722085	0.00803310523634486	0.0318055469325422	2.1298651776894	2.18403840885425	1.85252270095942	1.57921820297917	1.80801984476113	2.07282140651209	1.74648948255013	1.67739664620493
NUP155	2622.42691141933	-0.329170089031645	0.00789302839087987	0.031339948682466	3.96012131480584	4.10478412395636	3.51499578965158	2.91895890084123	3.4371766928215	3.74674113313127	3.52270935426994	3.43785673210528
NUP205	4658.67417993948	-0.419125270608377	0.000295840911792399	0.00196524967190187	5.49143973590442	5.65035048947891	4.53926390116585	3.79834313992845	4.48460575604359	5.20847862387497	4.06512363587903	4.01222851153578
NUP88	1667.53973772736	-0.350493614107172	0.00371184462650047	0.0170005752026478	3.25035303599731	3.31403024586866	2.63103604950837	2.50983961215827	2.58642614085712	3.1328793320653	2.41186959832804	2.23722887815237
NUP93	2369.93732770764	-0.439982662138924	0.000616873101463967	0.00369659224514849	4.89237221378723	4.75017343368519	3.94454853769154	3.15785016226286	4.05354273885966	4.43430081035157	3.78857348793471	3.65261491874859
NUSAP1	1364.15458493142	-0.977190155979266	2.63804471668687e-09	5.14856490522221e-08	4.77353775817809	4.97812143685539	2.84944155576794	1.98697501218529	2.47479715764792	4.02259255417869	2.6811390336183	2.46212531064174
NXPE3	2251.26327033626	-1.39142187465745	1.113528909834e-27	1.39448875050971e-25	2.33552897695473	2.41904878017735	0.840699733797696	0.916406030999959	1.72881241477582	1.97095562294203	1.03729420624926	0.962004940627272
NXT2	290.766891665105	-1.20421769212399	3.66237448520506e-09	6.92777830942635e-08	0.864587197279629	0.96297677359547	0.389350329476383	0.351041708342495	1.05900838088416	1.16841074813309	0.54817424667356	0.417238517289733
OAF	897.137677334194	-1.04268165183049	4.37327554919626e-12	1.25580789390402e-10	4.7157396378849	3.88266517302491	2.10965793009821	1.9376172949146	5.32663402291951	5.30665358604074	2.67262252988979	2.73313193539911
OGDH	4297.84380706632	-0.39355248844916	0.000178555378175804	0.00126703121187185	6.83003450709575	6.40275248652234	5.28860352117178	4.7820834668698	5.28927217773547	6.28632408479287	5.31988456803012	5.06726931662911
OGFRL1	5564.23444687207	-0.497669931805404	2.57863124504562e-05	0.000230661813227695	4.53313555309549	5.10869360859552	3.57093749273983	3.24320082163828	3.13684338225982	3.24618723483411	3.11395012441247	2.49436877803021
OIP5	87.6492771520391	-0.895361630118877	0.00357918195913877	0.016493504598757	0.597392921838119	0.677773076062036	0.367840467480491	0.217943017418345	0.350521019719052	0.432543331866579	0.448725129076558	0.299835802778307
OIP5-AS1	1260.25649771956	-0.751771456505561	8.1301790810659e-09	1.47006246084781e-07	5.47898596883181	5.50966973960062	3.42788472981418	3.03470453434093	6.49473835413212	6.34608406016696	3.91512691346645	3.45914807768561
OLFML3	2597.23273962122	-1.80986953201388	3.00035490957135e-55	2.02899000759762e-52	12.6461374913825	12.5557202825217	3.73532333038816	3.27309138385668	19.7787842435737	17.9099434170579	6.97554644441736	6.21378331106948
OPHN1	1529.86355480937	-0.738785839939338	4.54812961659018e-09	8.5198688454823e-08	1.62966856131962	1.71322840193007	1.00577381817104	0.975413028765096	1.03961461231012	1.23217865811278	1.27517687450196	1.16081791926963
OPN3	3182.72306354912	-0.368152830946799	0.00139208404418579	0.00743305830936153	9.00377332033906	8.88943924735826	6.71957325708548	7.08494930957203	10.0292313085637	8.91208534021985	8.30481531151177	7.63360732320875
OR10Q1	85.4674837041665	-1.03772598482949	0.000638514055843402	0.00380939682632643	0.837119232597886	0.706062725938747	0.377048894226675	0.245172611578801	0.626678852998189	0.5155482721187	0.681365584828367	0.759420189004071
OR10W1	98.7604964422985	-0.983425608754577	0.00126421665200825	0.00683121462980887	0.543394220294677	0.691509240256386	0.334256557678936	0.193676746665033	0.39498806923996	0.396431452997819	0.496507072332386	0.617181223330451
OR2W3	146.322547307694	-1.20300279992224	2.54096864450683e-06	2.82666522254603e-05	1.40432185950414	1.52866164496751	0.625445569468415	0.499648069039126	1.26076290584662	1.62650024316179	0.91653497988553	0.882373933890445
OR51B5	381.00475220752	-0.641322038537871	0.00314851360101019	0.0147962635349766	1.59938142437948	1.58938280279909	1.21773073228257	0.769981084834974	0.67204340285328	0.755257464199152	1.4535208173088	1.29002704140395
OR51E2	218.403642910969	-1.22380178297366	7.64747506250021e-08	1.1740306494928e-06	0.788214291359218	0.691602754994279	0.326499689627207	0.252135622741191	1.11950066741612	1.12436860147067	0.542880045489223	0.453860201184223
ORAI1	442.791926773283	-0.576255040158567	0.00404868528399743	0.0183199961412062	2.78132208981092	1.94008226496683	1.61680638417601	1.44052176218757	2.72535783107857	2.76960733686495	1.66578233397433	1.78273744330473
ORC1	259.037836864403	-0.575349242330895	0.011500112856348	0.042497001743745	0.683257359521912	0.618206081149732	0.505008166196504	0.341926067101623	0.29295675542493	0.424773033992133	0.503469373697728	0.419747145894555
OSBP	3076.52922347429	-0.633142470471201	6.88454779374383e-07	8.63761678203945e-06	4.84671858310595	4.84436594991382	2.89087437172659	3.27382943645784	4.0820956246301	4.29166841311902	3.13888342563073	3.18977395932263
OSBPL1A	4043.51233962651	-0.366031952173563	0.000846822438007082	0.00489247051432968	5.9946363892235	6.27507191598681	4.78845303487359	4.72197275721672	4.50487774948035	4.85482882720747	5.14207314826503	4.98340939137325
OSBPL6	550.428248581881	-0.55483215463708	0.000930218589101173	0.00529854971607382	0.560656295976594	0.599742206946698	0.375573157795931	0.397771218866058	0.395280456814347	0.485216020788012	0.295467594603951	0.327473496317796
OSGIN2	970.282339654512	-0.389617523296005	0.00655431701158559	0.0269280490831394	1.57954956467727	1.61443325865181	1.32283987670251	1.11285116552068	1.49838021069505	1.68014415336267	1.17247836221553	1.05931692704513
OSR1	2017.45826116858	-0.973644834223303	1.76460239412751e-13	6.21516858869131e-12	10.2309526456456	8.41774447573621	4.93538585749157	4.37866794317754	12.6177652678705	12.5207885666837	7.96263004429396	8.8051041977452
OSTC	5867.52993644089	-0.388208093639011	0.000276230862761975	0.00185410541878695	36.7854950903418	38.924921359923	29.418118020183	28.4043471459389	43.4170748559929	40.416652611583	35.1190803610538	31.0381924792322
OSTM1	2272.85190060544	-1.14713471850953	3.61498008049081e-19	2.22239116311992e-17	4.42055364597014	4.81394041300477	2.21473064594943	1.88568296345338	5.74998406903612	5.11858158982572	2.40666969418707	1.9555634532159
OTUD4	3311.17023236668	-0.577312906077559	1.14294933833083e-07	1.70059293739544e-06	3.45622096491318	3.54658729680471	2.39006644603902	2.2848964826007	3.59975145112546	3.47636816367956	2.12372846588106	1.9290802206826
OXSR1	5479.9526092936	-0.738828854650112	2.00626599204743e-11	5.33099165863291e-10	9.69128664473078	10.2101601118531	6.30660895625499	5.5609099130949	8.27701123236682	8.97272964314664	6.43855238162194	5.99450476533687
OXTR	16445.817760654	-0.377779207090543	0.000627710608307167	0.00374990546702934	30.2340291115131	25.7754168036733	22.8931285644735	20.1498642746906	19.8203442855652	25.7370793861856	28.8969903730333	28.0755802554557
P2RX4	705.910291198495	-0.667614192383762	1.29069486277631e-05	0.00012424660511779	2.79895898179067	2.62103829174326	1.62590358685549	1.70807479536204	3.48032694734494	2.9489558005826	2.19230439158747	2.22576111753585
P3H3	4433.28267427586	-0.382406203737239	0.00465755989518274	0.0205056958275868	14.0111311904357	10.7238918490472	9.96080047692986	8.89323865628055	13.237753142805	11.6155714530731	10.2760851959058	10.4913996555761
PA2G4	2872.94123686336	-1.05816487949467	1.75069460141761e-20	1.22684686446493e-18	9.62090227313316	9.82659793978323	4.90316495059509	4.33145171573061	7.93094328122237	9.41597089343221	5.00816176100617	4.30938526357386
PABPC1	20948.3574775073	-0.44192057285868	2.1359150325631e-05	0.000195587344721841	54.3770273794858	56.3013229994258	39.9997338378731	41.2892507078528	67.5023119769078	68.4936363039519	53.5098977866009	54.5783758182008
PAFAH1B2	9435.28293706959	-0.456645062267545	4.31305395170021e-05	0.000365325760893078	10.8867301359764	11.4429458400702	8.80943561836262	7.46130138865602	10.0684275806703	10.2137740101625	8.89130398193179	8.16364438368234
PAFAH1B3	268.735998899453	-0.569452710151776	0.00914757366988955	0.0352984119501444	2.00047472680988	1.48844623120669	1.09972356904346	1.13747459773057	2.35485987708402	2.57268989619252	1.38754734918376	1.25695312822868
PAICS	4069.59529726836	-0.715818944834454	4.83724295950352e-09	8.99913494185491e-08	9.54141147643984	9.36675466477221	6.35658432396977	5.0866689853634	8.51256795763447	10.3308900132771	6.58717107464506	5.7282843193314
PAK1	1628.98835555953	-1.2953440335075	2.37113696419046e-17	1.24784542570724e-15	4.33368019411132	4.46704080922399	2.01515251812784	1.46507238321409	2.96206310237189	3.70458364242893	2.06373239540571	1.76145069585201
PAMR1	13639.3528142645	-0.857037568404957	8.13456633511916e-16	3.70437743038675e-14	31.1976868326787	31.3037732558338	18.5772095522308	15.7190964027634	40.855248960823	34.9069590935198	27.7509469836752	27.0674650134372
PANX1	5076.78071340037	-0.920583990043186	6.40279376443753e-18	3.59326911468953e-16	15.471786047952	16.0712826238379	8.66267490284771	7.87404964513731	17.2841451707336	16.0275319654174	10.7047005513136	9.96017831084066
PAPD5	1443.25308532896	-0.332295613699219	0.0107681515209675	0.0402874825231218	1.24971962427066	1.3506435630145	1.07609661019145	0.989129624611585	1.17687876818287	1.38401069057309	1.17354333374182	1.03607146453482
PAPOLA	7402.07871707474	-0.457703433356038	6.53484611459809e-06	6.67047499622182e-05	6.70761792527771	6.80003497530164	4.93339853744176	4.88385084124869	6.46908991125774	6.3695384862134	4.78684860461913	4.36520566333302
PAQR3	1352.49950070468	-0.346535234635572	0.00833235199688615	0.0326841823543751	2.59926354226714	2.71154905061879	2.23008718870285	1.94927198411524	2.57607436845256	2.84439424130029	2.27379141893379	1.88675571047181
PAQR5	792.707163328368	-0.515444672423896	0.00286287883679421	0.0136004342352096	1.06792965094767	1.13406816657419	0.888435624611718	0.640829965260468	1.1733737367315	1.19635131374781	0.819962485307378	0.778286080089815
PARP16	206.935631359556	-0.627463426634721	0.00547698638638592	0.023297667245596	0.598241440401955	0.644492169146641	0.370182013017376	0.393181608732213	0.804573057554868	0.572386964856117	0.469577336640289	0.367383669736029
PARP3	982.037309238433	-0.531160314664153	0.000236455186169272	0.00161599615610884	3.45075141134735	2.9270991172687	2.31114165717992	2.05438230694224	4.05843877447388	4.21652508689224	2.65915740874684	2.85668561097031
PARPBP	420.252111978185	-0.660279541392391	0.00107612899226893	0.00601259719869464	0.758369809820537	0.779533279942467	0.563955682889575	0.387042622439944	0.481568313772144	0.732054295474946	0.486629746816226	0.394023542873947
PAWR	1846.25450453524	-0.457444859381703	0.000990847024284843	0.00559082436522841	6.99130210046648	7.41785631150515	4.8471230191504	5.52751559403183	7.41133667090746	6.60596949872386	5.22602217549718	4.75898499198473
PAX8-AS1	6019.12461534957	-0.43682207267124	0.000128700074937726	0.000947560431972097	9.99750997486377	9.66959504302315	7.9694257178699	6.55842673212575	7.10197609029121	7.94365621707333	8.38349375657719	7.88809071824589
PBK	768.802384756752	-0.745860374048327	0.000369779330546015	0.00237702730305839	2.93309035625198	3.02508455119758	2.18232392546825	1.25573447619511	1.56889016148271	2.41557488084533	1.68560542720563	1.5297901574775
PBX3	761.914106880166	-0.79973919639173	2.5109516111122e-07	3.47892224532912e-06	2.04126240175652	2.07196285707636	1.28309960179754	1.04335833211264	1.89923090622718	2.05761667219236	1.65218266835798	1.39008006982096
PCDH18	13364.9611895118	-0.721341868323114	1.29433258453935e-05	0.000124508166471513	17.2255234384153	19.8678564569324	9.20194231550433	12.6690997443556	20.9448073858767	17.1688655629089	9.07173322167387	9.41141794596241
PCDHB13	361.401535554776	-0.985617502029115	4.44203015497142e-07	5.8272025068854e-06	0.880167170533757	0.95093384212048	0.407537415903649	0.462258672977111	0.912125137096493	0.71131249075706	0.472816210682117	0.440179403218256
PCDHB16	874.461336044589	-0.829396258274798	3.40816920423908e-09	6.49232232215967e-08	1.62705172937974	1.63160404781433	0.910906757651688	0.888245801327066	1.43224254323515	1.2786711157939	0.999153836598861	1.02508798806999
PCDHB9	283.914727526679	-0.824979068657721	3.47969470286557e-05	0.000300145860052658	0.572178903365987	0.524772025161245	0.307085094528908	0.284011719276939	0.571645259687524	0.575580666679212	0.335795683658615	0.292491359545507
PCDHGA2	561.608073171555	-0.397426228374153	0.0128589027076911	0.0462913652173336	0.856539509399501	0.854725420965247	0.641838217162907	0.64216089864516	1.12050198341202	0.959345714229132	0.649102703518349	0.654241861072146
PCDHGC3	1101.82910217704	-0.794948497620496	5.61127552453243e-09	1.03962330779864e-07	1.90813404947177	1.80392929684428	1.02394714647616	1.07179646482172	1.87928646221841	1.90821800881176	1.13360420401031	1.30280124866089
PCOLCE	8708.88390257284	-0.388835209626678	0.00273006747105316	0.0131122736313899	45.2737518214277	34.9549923692913	30.3362322355859	30.4762678735803	65.7912693821972	55.8676199982677	40.6970367148123	44.0914797317249
PCSK5	152.612038355961	-0.726864905375293	0.00772859742551804	0.0307935408445645	0.0916696377211084	0.120660353810011	0.0484821641495901	0.066289287883457	0.210689679570046	0.157404372071325	0.0797712945895906	0.0944547603746231
PCYOX1L	349.401284159904	-0.615311238342822	0.00114597799794524	0.00632110620807889	1.04173138574334	1.13835290513948	0.71908154277051	0.668541872964048	1.30800188854258	1.21241638355635	0.926391306069074	0.879108428486487
PDCL	1397.9980235283	-0.401967441821796	0.00161716508298917	0.00843832101365156	3.30877540572924	3.46171048160013	2.65274383160647	2.4606156807274	3.53346126617968	3.48452261240255	2.71149090718246	2.36181612936802
PDE12	1828.69719918203	-0.390599880281247	0.00084185608382537	0.00487210249625081	1.81925118532394	1.794370141563	1.42018050041807	1.33141690371443	1.34177349282298	1.5746727205285	1.30457601111556	1.15214430858306
PDE4DIP	4942.44084488485	-0.580280099027298	3.80884420254962e-07	5.06535082000823e-06	2.88821517548402	2.88871728089607	1.84599634565097	1.98711640655637	3.91847938024621	3.42147969827385	2.23073932655873	2.12229361631363
PDE5A	57096.8371343044	-0.450943939768157	0.000329738896197623	0.00215967001020477	56.7866884788171	63.1687237033972	40.9267632389874	46.278909846078	55.9703643758336	50.7767505320065	35.2708524803159	33.8528622260296
PDE7A	809.937000612313	-0.450771291211239	0.00177807949623871	0.0091474040268652	0.896627260030541	0.900193635392849	0.690877923024725	0.616929631618705	0.934845881085264	1.02945276869749	0.549504432382768	0.535690195107364
PDIA4	10214.1367620695	-0.34865231559419	0.000383324630731465	0.00244781191248492	26.1214682210719	24.7271108299519	20.0157250277957	19.8869071381274	35.9516606341545	34.7690299196031	25.3536194672523	23.5568732147378
PDK1	6113.65000909883	-1.15632404355708	1.8385551291059e-17	9.78994414218792e-16	9.29117360201774	9.82704124365652	4.81266427912634	3.59516497771455	7.33672516118657	8.85193696434237	5.78199621973009	5.7430045954715
PDK3	745.033693986795	-1.46155396544872	1.30252870164074e-22	1.15141834573144e-20	0.563621548923528	0.538307844043171	0.204897445296197	0.180183507516642	0.511801019749323	0.513826311062122	0.276465382238774	0.262475346123395
PDP2	527.560727826932	-0.757902659736939	7.20372336597279e-06	7.29269150634595e-05	0.645099271966224	0.548050888674961	0.340156209580983	0.342546274159706	0.612376768137137	0.604280103186529	0.342911132367539	0.322907240648441
PDXP	417.32704606468	-0.593056973557405	0.00118263052745815	0.00647836285292487	1.7318556492848	1.57915923013759	1.19274977638851	0.96160448199737	1.3312181441806	1.36655647666277	1.22395132600674	1.13872446580625
PDZK1	151.855052143837	-0.775386717064362	0.00165925340889604	0.0086231914244994	0.546625053321864	0.576457486903622	0.308371859033558	0.298723538266243	0.259004553483708	0.327913517832145	0.327026811758928	0.253202954942475
PEA15	12515.1840068563	-0.794832479952947	3.76666062611527e-15	1.5969932591915e-13	37.0537793102224	37.5487795848787	21.2137860125021	21.4901042833711	38.4528382078995	42.7149800283601	29.6213722795312	27.5552503711174
PEAK1	8552.67389847661	-0.680816745857366	2.02852335283413e-06	2.32506596161708e-05	5.73505074944009	6.01686543927082	3.18259419894245	4.00974966647523	6.34200491705474	5.73764266710901	3.84155164285408	3.93192903645901
PECAM1	30.3958139657585	-0.906726752258338	0.00933510163238101	0.0358889282484233	0.0116873515316674	0.086920230319158	0.0133133475199381	0.00354519972400776	0.141590403541606	0.557714912457251	0.201341765732348	0.0852660023964412
PECR	218.905170923431	-0.707366913470495	0.00282915575797507	0.0134923595298353	0.894512716215075	1.03836846945663	0.659898732354328	0.471611827746273	1.1600621139345	1.23283752364381	0.750029151727648	0.656836519624958
PEG10	1650.21003010914	-0.851851743689751	2.16251300966468e-10	5.0514660545276e-09	2.14826719677425	2.07303117334763	1.28273540931956	1.02975870038594	2.27846217800997	2.65750405437749	1.17609082738781	1.03939868570453
PELI2	759.56921029525	-0.90289361973284	1.65096328439944e-09	3.33272812261231e-08	1.10886979324296	1.18584803611455	0.614608724913154	0.585044312688406	2.76128928852891	2.43364204983339	0.967039085745112	0.968969269045775
PELO	3276.55522609359	-0.504093052203465	2.33489338786166e-06	2.63381426779224e-05	8.66930813393784	8.60904860961684	6.20318102102278	5.94459120074359	6.39056066939254	6.85607633022463	5.95578405931654	5.57527365762969
PEPD	1397.1624320602	-1.10349931717357	7.90946347669827e-15	3.28145685651362e-13	6.70665730153608	5.83491806376988	3.15767433660208	2.54786096284418	7.70570761110733	7.51398782029121	3.56822259254728	3.49327889499165
PERP	6414.0492579942	-1.13133801668134	2.17210333194207e-22	1.90764269899458e-20	13.1788540063354	13.7660156100803	6.63904332277215	5.50605900348032	15.5898920180454	14.6242995303386	9.38307983839539	8.12227052116727
PEX19	3358.6022813734	-0.470790656936356	6.50653957719643e-05	0.000524439498102394	6.88593332495167	7.06911196072186	5.4622534883847	4.60235456007885	5.5203478011518	6.08094486373882	5.292844556132	5.05038228718979
PEX2	1825.50428776717	-0.520394182020839	1.19932075650464e-05	0.000116612604110174	3.07845958920845	3.14343740865887	2.22469525911623	2.09490485199736	3.57265795310053	3.42685846354233	2.73720799113463	2.48477354759394
PEX6	1589.68842098863	-0.456723831836423	0.00176411369853546	0.00909284976093447	3.56420630784097	3.31032394196272	2.84495908158159	2.14768556923443	3.63850722362734	3.16600542161093	2.68150326932454	2.52563553541106
PFAS	1363.32966035888	-0.423055852648957	0.00298263716785222	0.0141148242460466	2.09937985652598	1.72103490803093	1.52310134693003	1.30679863782062	1.56597671642889	1.85795692061305	1.41793510852398	1.36657355778019
PFKFB3	2775.69561882243	-0.369261218737131	0.00261850471636716	0.0126709396382347	4.3702659236595	3.84025470902461	3.43961912891691	2.90883743562138	4.60914289085247	4.37397087820333	3.44903694261266	3.66113810197204
PFKFB4	730.129181537229	-0.897187799642529	6.77232286958868e-08	1.04800534108909e-06	1.61424645054046	1.50973499118219	0.935514108208931	0.704026976006919	1.39003211893592	1.58481493569377	1.04787870054991	0.96537058746339
PFKM	3027.57547887803	-0.826243191252632	1.25046621735036e-13	4.46241572286639e-12	6.68424106303488	6.6290626761205	3.96020722807638	3.49699108180211	6.20457962997854	6.67005868576343	4.61459848519125	4.12336132067821
PFN2	9918.78376451844	-0.398951494353968	0.000175161672889477	0.00124687453991062	34.8450543453936	35.4381601602534	28.7131970162064	24.6479505557522	33.7245229377361	39.543457786166	32.9168857384067	30.7720049818991
PGD	4056.54833486596	-0.39863164918115	0.00046783693611036	0.00291187048361372	11.8991991290525	11.901813904312	8.71786243965708	9.25734531782662	19.7136346668346	21.3144194331957	9.53803864265634	9.16351397749487
PGM1	3535.82681225896	-0.387615028229842	0.00265449475518193	0.0128084343788211	8.03839068341534	7.65435915201343	6.74791822014819	5.24756811190251	7.83568554245584	7.94432208290832	6.6122160968839	6.61188517993488
PGM2	1991.45227295358	-0.52104638691545	7.86971541055667e-05	0.000618475003263561	4.72094286568458	4.8015538156242	3.67034353843294	2.94913017421015	3.34499676013548	3.69136975453454	3.53600124854979	3.27620155040083
PGM3	6681.25079672732	-0.875851417806125	9.91471228087073e-15	4.05125328092981e-13	8.52709057509751	9.34740846153078	4.82168592504089	4.81819032243784	7.76568939823028	7.77885861972426	5.66385538315067	5.26532126955613
PGM5	2296.88391168754	-0.333618913702386	0.0131750475844315	0.0472033161799831	5.15942474981962	4.91262772211073	4.5056468103711	3.49640808969952	3.87983835029519	4.36729742655829	5.81768923800129	5.53730616541944
PGRMC1	4560.27940708188	-1.07263694954434	1.65374145624421e-17	8.87573539512021e-16	20.7828927834985	21.648446876596	11.0973654538967	8.79308599472215	24.5439342710981	24.1581552757809	14.3360514807895	12.6045208247899
PHC1	620.325045775681	-0.699258910313177	5.10479854594438e-05	0.000425137933090503	1.03135062945057	0.939230707023546	0.534056602059465	0.635633385891027	1.0731852295886	1.03473385454487	0.688421740286082	0.618820977593183
PHF5A	580.818160280984	-1.16566504191645	2.09772482188364e-12	6.34714277762331e-11	4.77823375472499	5.21508686210989	2.29673370872833	2.00075759823251	5.0850232438116	5.22611560065517	1.9118824561882	1.98223440078206
PHF6	1898.56353586509	-0.78195978043305	1.86923392811446e-10	4.4121097517885e-09	3.1110736494485	3.28477623678703	1.93981892686223	1.74820955585971	3.43722522921045	3.54525418990557	1.87784906151374	1.73221301041297
PHKA1	438.235323812343	-0.567586656033604	0.000957778775739858	0.00543370719038657	0.565224582565524	0.556738426304391	0.389637448143983	0.35420564593604	0.551261702018563	0.629122025134948	0.510534545514963	0.45436313995576
PHKG2	709.020349217998	-0.601371856627485	8.13082755997423e-05	0.000634927498548796	1.06022715374694	0.98794687813832	0.646321380162856	0.676139977099881	0.987578559067525	0.946895111800088	0.698455022009918	0.782376887891981
PHLDA1	12481.3652076131	-0.351896949219823	0.00557142603218875	0.0235975850799527	15.0422074689016	16.0238392733881	11.227483919502	12.9867694235367	12.6769736350643	12.2738285174865	7.56675508207587	8.40627932198266
PHLPP1	1088.03107618294	-0.431483651832386	0.00265757925939554	0.0128187444662356	1.31671386821966	1.24496933989604	1.04815771130416	0.846497999690895	1.077631287945	1.21811303840787	1.13649840897931	1.22735447753362
PHLPP2	1554.53891355384	-0.358965633629226	0.0049841972632212	0.0216686814481089	1.2612023480602	1.27910149816872	0.963145174632503	1.00633643056695	1.06692623832802	0.947816688461185	0.933406506034939	0.930228192618316
PIAS3	2217.44853887583	-0.459295158318821	0.00136441668818834	0.00729973722616587	6.10306187354783	5.56205941697829	3.79450131194299	4.56197387745055	4.93195187856641	5.0069967483063	3.79879629820976	3.96110490136381
PIGB	745.631541537147	-0.399116893241862	0.0109660601473179	0.0408583921466873	2.42071675252427	2.64811957040625	2.07769422429272	1.75651374013374	2.47201763948947	2.57247826944826	1.94694794346117	1.92178392064897
PIGK	3149.78091875058	-0.492223746318321	6.66916794224409e-05	0.000534997013160447	5.01600595905391	5.43105580561697	4.0166556574159	3.40039077138918	5.41471337631886	5.54852557686063	4.51584476703941	4.03364127508729
PIGS	3002.97792202255	-0.899320416464869	6.58444269617031e-17	3.32293236812326e-15	9.03687946925129	8.86009166923904	4.89623957637108	4.61223635552349	10.0227120415902	8.99523875001527	6.42608771642863	6.23543222861495
PIK3C2A	4881.32718951682	-0.651036551457673	5.22349652728653e-10	1.15816050051722e-08	4.53975494386587	4.66609628030077	3.02744207859457	2.81357038424482	4.46126625686139	4.59945782273584	3.44062152379591	3.1680813474035
PIK3CD	3085.46698902339	-0.603346238863606	1.75873785689561e-06	2.04179652485092e-05	4.88853824751374	4.16793204533975	3.22145857598922	2.69724934075032	3.99049538380924	4.22736108131673	3.80792295721489	3.64217738189671
PIM2	180.882303720503	-0.962605173228562	3.87659559563087e-05	0.000331212605375284	0.725429420601555	0.744984492967143	0.374198203955462	0.323845970673507	0.558924071615505	0.440892443798552	0.34739792393322	0.357064897802032
PIN1	1020.80457468733	-0.682875084112032	6.4208966619922e-07	8.13133214919893e-06	7.41763222061415	6.71999509169669	4.58914380462208	4.11044827207502	7.22864758385903	7.21914346778636	5.12335528027949	5.04374870139423
PIP5K1A	4400.99404399082	-0.337131684776733	0.00186087932645855	0.009511864282068	8.50547161174964	8.42203568952564	6.59052656063155	6.7814931994797	7.3159493797	7.82701243931995	7.16264638160349	7.04358236749863
PITHD1	1111.22744418771	-0.401715604627155	0.0024659500162198	0.0120534781240957	5.35814088681272	4.89637531434538	4.03635744537902	3.68915789190056	5.01298466808788	5.77990503500665	3.69574633697596	3.68426477637055
PITRM1	4595.02070387698	-0.388609458821879	0.000151665108927213	0.00109576420846184	9.86943255868075	9.71486465975939	7.59227784003641	7.35344133169256	10.1173021204524	10.7477279989617	8.22673421830069	7.95843137651475
PJA1	1508.71338946311	-0.358738165163078	0.00433393269996923	0.019390155397646	4.04666430567641	3.69437470747607	2.986803289197	3.01305201248384	3.64528820291306	3.57012383536395	3.62468480120848	3.04464964167927
PKDCC	2967.18868900717	-0.425661058693843	0.00193854175799883	0.00986039010038891	9.379631166033	8.5057984947466	7.55872891018343	5.72667408996663	13.8427972537274	10.6003999906148	9.86684556304303	10.0920857172876
PKIA	591.231083789381	-1.2511192094664	4.6982311897764e-12	1.34058178990983e-10	1.22083581391639	1.41001170468858	0.597398837012257	0.459662866143561	1.60770392621403	1.61348797188099	0.721599487258127	0.527723044251307
PKIG	3236.28111249283	-0.550816086447169	3.19526199247836e-07	4.31727457025672e-06	14.8592741394093	13.8867071518678	10.184385213422	9.36938511189442	16.0230917086906	14.6243828437128	12.04464764859	12.7387090114559
PKM	108500.072906874	-0.345356778987536	0.000381413097884242	0.00243675585681832	235.560232295275	230.111574286113	195.878838152801	171.295738523871	185.044671494078	209.690023845829	193.555282343765	179.425926273274
PKP4	2857.82005257727	-0.581360493836263	1.80670885024514e-07	2.58033127767323e-06	4.70774468858362	4.72703422706631	3.13710017232651	3.13075558471473	5.31874216105718	5.65287133529409	3.76933592029449	3.73820648475385
PLCB1	887.121678472785	-0.626532560370485	0.000127880813519945	0.000942554769949459	0.971917526273488	1.00495561420482	0.563976454999948	0.682029133528448	1.48353580069758	1.39487057912696	0.809622743728347	0.757553589003348
PLCB3	2480.89146058323	-0.396457417635986	0.00127280018724814	0.00687210480340561	3.48222323043852	2.98951503203617	2.6097972921539	2.29170037789451	3.3266408234552	3.23506187163665	2.61034605966369	2.66653156348527
PLD1	1575.04331504863	-0.420132674192765	0.00206473927419423	0.0104075789586279	1.98899082498977	1.94987122776434	1.37036661433276	1.54073570934901	3.4746834940387	2.96625756054012	1.82846626801798	1.79367215855987
PLEKHA2	5255.0981119269	-0.562747078311799	0.000100458663281457	0.000760326480627702	7.24295118075163	7.384558516206	5.75407364804684	4.08767421129764	6.02459334408912	6.36456616889395	7.0493266058623	6.34675612820933
PLEKHO1	4069.89180301091	-0.516837152883977	1.30334234507344e-05	0.000125196770007942	12.1144582363765	10.3397330544723	8.34147385714398	7.2761908998859	9.1173284077628	9.10130694760966	8.69108294517389	8.36007651293779
PLK1	585.874500602965	-0.486170641896194	0.00754967301715147	0.0302456538972078	2.12532588472907	1.83954220907483	1.61733492500118	1.18037868544664	1.10424347215276	1.93704187748946	1.26459709883311	1.51712514325037
PLK4	733.460344447588	-0.881989735151496	2.97942684194046e-07	4.04585823667116e-06	1.60848089671682	1.54215900891831	0.969618264757485	0.70004605263564	0.813349149635947	1.21874671319246	0.802549205429047	0.713960886433257
PLOD1	27791.0750268572	-0.5904200993192	2.87650965416299e-09	5.5578275817935e-08	72.580124870342	65.7444460099461	48.3976655549608	43.2194186287668	73.4479667230281	68.4200895574398	56.4526040053631	55.3688252636787
PLOD2	19880.9785203998	-1.0895280070697	3.89661631798209e-20	2.64832842717125e-18	43.1006683907448	44.6496143833151	22.6619742445151	18.039485460379	34.0394548511109	34.7863760672363	22.0983439747053	19.263207740051
PLOD3	4354.10944753554	-0.383047244986259	0.000973659908346261	0.00550993734744066	11.8215234657568	9.94648961279231	8.49434950835183	8.12851210737358	14.6777796508067	13.035922813178	9.48104013963673	9.31427640997891
PLPP3	9631.34757585087	-1.16337441780195	5.62180154416469e-20	3.78282914849888e-18	26.5800510803684	26.5067551583717	13.2244563752365	10.0692232404503	47.80118389855	44.3201221232033	25.7578600268576	25.0028176218926
PLPP6	371.781693397262	-0.736285371239317	5.47084423681136e-05	0.000450628308787294	1.08522884992688	0.985345574654182	0.628788643625462	0.57506555006188	1.05958101947011	0.961414829138058	0.601890517876807	0.559814278299074
PLPPR2	1101.36741937789	-0.367422988726655	0.0127757564867681	0.046080140339745	3.20113277642788	2.76548365148388	2.16800317058002	2.39444766813213	3.3760809626203	3.08019015282782	2.39034721498726	2.52842111570503
PLPPR4	866.4468319957	-0.708741225913394	9.0880882537572e-07	1.10935373314139e-05	1.45637793296058	1.36601570866641	0.916182054200631	0.788922535257359	3.18117717567604	2.28881053385553	1.69440535802267	1.57340871724192
PMP22	3363.59573511361	-0.96243206829933	2.4562495771129e-18	1.4076599801039e-16	13.3526791042045	13.3491119095089	6.72327087946633	6.80630816091237	24.0216372047647	18.9455502298158	9.74752751644696	10.0369531571815
PNKD	676.264136613477	-0.55716898888434	0.000195268502877943	0.00137266450177972	1.4281038543141	1.40556240355354	0.980928867255424	0.921349602505649	1.52664171989062	1.39952476370739	1.13000242355292	1.10797421204802
PNMA2	2127.12778702104	-0.736798128473881	6.69533252250301e-06	6.81372252572259e-05	3.60742670254273	3.63979610403888	2.56315731375502	1.7175947641399	4.87083376612985	4.36759488127462	3.64201560080119	3.23379303877307
PNP	395.73225806816	-0.53430402933127	0.00441177541150789	0.0196928258880014	1.26941244197009	1.28329109422465	0.972776223145185	0.7651173605103	0.690245321889667	0.686142821181875	0.881835406688925	0.787248119456159
PNPO	548.696044805034	-1.09484116174253	8.94431916804851e-11	2.19152023093942e-09	1.35056791272886	1.50772107448851	0.677055763312662	0.6132044483662	1.25927440182555	1.31975203242433	0.784974934925885	0.742951212734595
POC1A	394.81383958465	-0.557905533774842	0.00280255440605336	0.0133843744145027	1.43046970458859	1.31227267097492	1.01880289124566	0.811752215587979	0.907767493061558	1.22546675461941	1.05903805049341	0.881595483132712
POFUT1	5587.99975454135	-0.562829205076802	2.28762378554293e-08	3.87235440544031e-07	7.22455016075879	7.03495649273106	5.01560999985369	4.61728097803652	8.00888496724683	7.7090613204647	5.65701760072443	5.54450124718446
POLDIP2	3293.48846217923	-0.333057550526119	0.00546786472008864	0.0232775795842615	8.62919501942678	8.95811897997726	7.61461216230246	6.377442880026	6.24686307103563	6.92033208572466	6.77593113915238	6.8982814214179
POLE2	230.30464557693	-0.710925400972414	0.00496773850146575	0.0216110206601236	0.984982346051884	0.986898402549192	0.724636264883418	0.415492395160527	0.405718747686562	0.711718838938012	0.730462630092777	0.629456983687914
POLE4	778.318062183381	-0.645888585895523	9.70148290235884e-06	9.56359739463581e-05	9.11789737273334	8.86138149472635	6.03588154673332	5.32284232699838	12.0271445700768	10.0818020132264	7.90324287328698	7.68273856232198
POLI	1487.37813542992	-0.378601291995064	0.00315815519838957	0.0148261190760913	1.76897557305265	1.87174064143696	1.47397524953906	1.32499937753608	1.98712338307078	1.96358107785784	1.46985449372791	1.28576360208285
POLQ	826.922425425809	-0.731673627419023	0.000315822582569294	0.00208025419616314	0.792109251708682	0.770066821572824	0.574786341417465	0.338523167154093	0.415902942433975	0.550194273598007	0.431799396994686	0.430383413654423
POLR1D	1449.90473525498	-0.379575977156863	0.0053594294940158	0.0228879961814221	3.63770267667128	3.49034932517145	3.03200909622866	2.44642699315601	3.82982350199419	3.83770695150857	2.88557573115669	2.78517533934128
POLR1E	1362.10515679175	-0.409220951772004	0.00134497750786697	0.00720999635112992	5.10600849930767	5.29517865896909	3.95791843431424	3.84278554156459	4.86192867882261	5.37192740860773	4.36803488723814	4.27357711865135
POLR3D	1411.73900622094	-0.386902998801151	0.00174241107014422	0.00900845172924334	5.61234466647211	5.28659845389924	4.23775101303776	4.06229301734481	4.92103943491596	5.18172688867182	4.3758037193479	3.85952828781785
POLR3G	457.193756481115	-1.45490785683968	4.2898810964524e-14	1.62522806245151e-12	1.33041018268813	1.3875279370816	0.542536135707481	0.388819914631606	1.18932490806826	1.57806366653398	0.679967191277729	0.531841823166843
POMK	876.002041336031	-1.08777885488641	5.84905137523442e-14	2.17330823763861e-12	4.91833708942009	4.79988066959199	2.15700018305935	2.26770458747745	3.7657638466516	3.88814994236497	2.17207822842801	2.1406946178026
POPDC3	399.924777907258	-1.29747865315676	1.96677553615978e-12	6.01824414628078e-11	1.89536458522682	2.06414194721641	0.808902553919421	0.714310901743382	2.01610508919814	2.0782256878021	1.17283611509354	1.16357002271267
PPA2	1267.55997704421	-0.413095588491726	0.0016111360699827	0.00841011784890621	5.70772210773705	5.6539540293319	4.56009606860895	3.96023761190047	5.7757848548967	6.09446204576695	4.70478537351502	4.98016489585208
PPARA	2277.25630365874	-0.441635629021495	0.000134795994466825	0.000984935615971802	1.74360653856132	1.6863212808816	1.24600293784199	1.26592497294795	1.87850125831551	1.72810416875581	1.19607836476621	1.21173851006947
PPARG	2072.31056853372	-1.05745183332171	1.18596127217158e-14	4.8024329958445e-13	8.20556788549255	8.11199576118829	4.35162912667941	3.35707149959027	8.28007165316896	8.10406425791777	5.97936916227273	6.06217796604582
PPFIBP1	4235.63780834783	-0.47352773056041	1.56307679947924e-05	0.000147756971118427	5.18471845101073	5.29306009709766	3.71973635054152	3.796392494647	4.32842735658349	4.48098467385337	3.45770502605284	3.48909530828073
PPFIBP2	165.265683514754	-0.606871740913048	0.010977181022207	0.0408660537642029	0.335812518273174	0.324835352753416	0.218268395581148	0.193991337409614	0.394387262509218	0.307124573851601	0.315861310615808	0.342271997370273
PPHLN1	2199.02503655854	-0.402976894004739	0.0015132148438933	0.00798214928379755	3.39058734671992	3.77649601195833	2.70311478590806	2.69796754601676	2.85330881293939	3.15660271931621	2.68608453626959	2.46381511202452
PPIA	23949.9687432593	-0.387558313113573	0.000104971258480919	0.000789619728005804	70.8831118500313	74.6526198786299	57.4924089362879	53.8346625476455	61.698980231436	66.824040131565	59.0499190632966	55.5191844538675
PPIF	2140.99395841584	-1.07493981712086	3.45439554450846e-16	1.62789894562637e-14	8.83966856611082	8.56317037533358	4.5382417995533	3.59215952012469	3.75220233001398	4.73870881120377	3.57086852031718	3.40816931965184
PPP1R11	92.9096661667034	-0.740100144463287	0.00976980292144832	0.0372174386204325	0.0630336478223302	0.056552296450413	0.0341919844931854	0.0295910998246455	0.0506185958868664	0.0588735533409006	0.0348539631782802	0.032847642120461
PPP1R12A	8767.80168172472	-0.652900064230865	3.68087499801945e-09	6.95304948997388e-08	11.3193420195148	12.3580368016622	7.50204444993293	7.47003671910023	10.260233300322	10.7402054100085	7.57969786284788	7.11102243744735
PPP1R12B	2652.91146197597	-0.600593385040579	5.4241791863024e-07	6.95374630281896e-06	1.69839597789975	1.75514252453575	1.10030502690885	1.15668074902299	1.16622663738249	1.30580004984906	1.48294422156353	1.45642801829407
PPP1R15B	3961.58270299982	-0.443276410913733	2.78291669939009e-05	0.000246812776126236	5.63016174260222	5.72236015749825	4.25696557991107	4.07998329192779	5.28328435125031	5.18598748295585	3.97159976893955	3.89467077055984
PPP1R3B	1589.5137806123	-0.560851991158932	1.81894653207807e-05	0.000168271216459343	2.1696653516957	2.0816728395529	1.57214978131887	1.29767984845563	2.06385884147284	2.19647598455429	1.91917341571956	1.85691595918573
PPP1R3C	3792.12271892925	-0.889004299993378	9.24387712542514e-14	3.36084511078965e-12	12.6859680133851	12.5103625120248	7.42077812266373	6.06519646911795	15.4820232099709	14.6951695933035	13.8186384782467	12.8908244813116
PPP1R7	2414.36099052045	-0.53087271985952	3.75946918299248e-06	4.00684166272445e-05	6.23587707045813	6.40495421883787	4.38856877086154	4.31702348196547	5.54470885504752	6.166008876947	5.35034514041281	4.86347251757322
PPP2R3A	4577.34463410629	-0.416002861042071	9.03424428568813e-05	0.000696228797515281	4.62244905872175	4.80248299607239	3.6267160415006	3.43326920882369	3.35343948549157	3.61235677694743	3.76592661454169	3.78744559386226
PPP2R5C	4451.93415009532	-0.59022761943462	2.61038855076035e-07	3.60260256622794e-06	6.69630984206039	7.25132237227621	4.88151404381057	4.35462127728065	7.06042023624903	7.1577668185426	5.37791857271881	5.05897309564695
PPP3R1	2690.06773866453	-0.331301649582534	0.00439496520758358	0.0196242668975133	6.36926694900347	6.68829024470563	5.17616407651471	5.18592457319602	6.05096535191098	6.49667689142994	5.38972360875195	5.28589167470903
PPT1	2091.36445807121	-0.538116531634047	8.59662441699361e-06	8.59777526335782e-05	6.83801080319341	6.16952358605345	4.75712916394338	4.15931461010494	8.12579635711666	7.56808936417002	5.34319511273754	5.1034267162813
PPTC7	1034.24145804973	-0.512256661259551	0.000541836861423419	0.00329956936098683	2.00466689080343	2.26505122066218	1.45323287014795	1.50528158719016	1.84949404641515	1.94859649914776	1.57303411281258	1.33486131407653
PQLC2L	60.0225459167972	-1.11071492603831	0.000581435480830099	0.00351497066498879	0.235417409822311	0.189149218283154	0.0792132096358713	0.0681148037717027	0.359445355766864	0.502465750175838	0.223377495575311	0.168147482864785
PRC1	2509.19188053507	-1.04355637087559	6.63943886766069e-10	1.44370435185066e-08	7.06285154978795	6.98295816611163	4.02202071425772	2.58551610357764	3.66453008476949	5.54854498924579	3.49870329910354	3.1616094245667
PRCP	4695.70735702975	-0.554867982797287	1.91709864251573e-07	2.72075122140874e-06	9.5060008852232	9.45614553811261	6.85032307697184	6.03621350448881	10.3706697731972	9.59621248629511	8.13775235960861	8.00706439492105
PRDX2	2464.52317692309	-0.439331140484078	9.39349455770018e-05	0.000718185494024279	18.6103620930941	17.2850489271804	13.7709265046407	12.6375526221451	17.1499862172738	17.5945304640088	13.5556276383131	14.5935977938962
PRDX3	6214.36851549117	-0.617099417082778	4.47746496015751e-07	5.86231496477545e-06	29.7014685812834	30.9851026833572	21.8924555854473	17.5211267728818	28.8420886258408	30.9437471194844	24.1499904630205	21.3768491718762
PRIM2	1171.90513285198	-0.466316031030447	0.0039032077884552	0.0177747088683019	3.31272135489346	3.19499802239337	2.73451800963977	1.95360647973078	2.88079114221879	3.53754159605614	2.78486303170578	2.68321891714867
PRKACB	2779.43036555679	-0.354531439525234	0.00617017606213769	0.0255908099479952	3.00441098730448	3.17524943815524	2.27291116338619	2.53086093941951	2.71110102365659	2.81120074559081	2.38850248467918	2.1693300931633
PRKAR1A	15156.4103249102	-0.433917576334857	5.87541351432713e-05	0.000478336144473767	20.8310213275052	22.7940209721203	16.8450950566628	15.4405790151497	20.0365734953395	20.2644868964898	16.3359125626167	14.2646238825498
PRKAR2A	3935.59820412255	-1.20564924468276	4.27377870237029e-26	4.94041512389386e-24	5.39355479468163	5.76907057083	2.37752535766908	2.37976869805652	3.22244626327993	4.05317198415972	2.21180880992291	2.06148443010466
PRKAR2B	529.482317325797	-0.556904353082636	0.0106079693803852	0.0397924377207048	1.05749621186082	1.2378159395	0.596100498625582	0.888751115596694	1.61027389591073	1.28821183587829	0.736723674331858	0.679676179615147
PRKCA	11645.4190660817	-0.364499904303248	0.0016684786890213	0.00866596554109567	9.8847807872245	9.73722200771788	7.16450889632537	8.0092312352648	7.65269492126891	8.34723375993366	8.69868041740576	8.39261364828637
PRKCH	62.7933650070706	-0.888359171659852	0.00557620785774638	0.0236050739518059	0.160269620453363	0.136710460122015	0.0753825190144475	0.0548886006492264	0.230491569868921	0.321526011122881	0.173209364892466	0.164587884041741
PRKCI	7282.23163858941	-0.506212380854642	1.24205262894718e-06	1.47746365932371e-05	11.1895831857846	11.7676873533641	8.21052459674021	7.92002626917883	12.6153733023596	12.1290335006102	10.7430332659446	10.1922861344041
PRKD1	1917.14516218698	-0.731467321365426	1.5969937361437e-09	3.22860093891533e-08	4.25731258460203	4.13542762047622	2.69395764577248	2.32613080264507	3.70114143232719	3.98931007466273	3.3895393103493	3.31066699995695
PRKD3	4953.54203891745	-0.480092540075697	5.47515362666356e-06	5.67009592654093e-05	6.30772669215024	6.51692764077827	4.78839288966688	4.39801788059151	6.64458094262677	6.72420405729214	5.15431392003792	4.85851354059721
PRKG1	2930.9208334843	-1.24014373559487	2.90184768518933e-28	3.77379710982555e-26	3.73372276417847	3.87700460936729	1.64573126692442	1.52738150325072	4.82743673721389	4.60184407283339	1.98634055244779	1.8091639103672
PRKG2	364.455454306918	-0.889291549265152	5.34300220214355e-06	5.53747929379246e-05	0.610170137743659	0.64591867574635	0.368881358971203	0.285493431811233	0.61533310561677	0.703994279472982	0.321880421750787	0.343850753614382
PRKRA	1105.40435586728	-0.644741627211832	3.09226152872587e-06	3.35656799165468e-05	3.85011763911931	3.89269757992122	2.66320994105412	2.25253069434903	4.25828287125113	3.99625859186117	2.88847802334413	2.49287005111563
PRLR	216.185334796413	-0.999914412842271	6.20101499917698e-06	6.35369150483853e-05	0.159280531960272	0.153936354740744	0.0795758663366595	0.0667098517064324	0.0664507708328673	0.102887201255518	0.0960395790488167	0.115829006798681
PROCR	389.281040135849	-0.692519821866463	0.000128387468905527	0.000945773702040984	2.28608218723365	2.01799931550054	1.31125707561266	1.26656978313664	1.68910100164577	1.92352286169066	1.67413260042398	1.34674997322228
PRPF40B	550.604782104323	-0.468868903813311	0.00678347612551138	0.0276761733325917	1.13976483363815	1.03857040826935	0.713498839366068	0.820724680897271	1.0847420398726	1.14945342180693	0.775982572878455	0.80360270799387
PRPH2	73.7106973580912	-0.814270596625513	0.0108003111086254	0.0403854597025596	0.220856001585989	0.217914757214642	0.0750992431129644	0.12298838933522	0.242803920285355	0.233388452179461	0.155616366362078	0.157410612586997
PRPS1	3780.0197438564	-0.481829493706074	4.7708625238899e-05	0.000400284836449199	13.7453092854259	13.0915959369649	10.539632594591	8.65196661007529	12.3618929928449	14.6169524050456	16.4391324036628	15.2031473604802
PRPS2	1662.02123332676	-0.402187929082529	0.0033464663498219	0.0155482505604058	4.85154500675151	4.92643409156813	4.12407670954631	3.27576280029827	4.12714843507504	4.39380581777777	4.39703193572311	3.96807726766284
PRR11	1378.72145575149	-1.24420676740688	3.72021752264727e-17	1.92045580129024e-15	1.9700265102836	1.98815722175667	0.925737336425395	0.702788743913263	1.14141158122745	1.78902026020432	0.849784804543139	0.747352864599778
PRR16	1008.83257485545	-0.419192791134974	0.0021572580230436	0.0107783209315348	3.29381922430491	3.38523861409969	2.4973777316098	2.46453406209838	2.61174966160948	3.25651768104719	2.21373516673844	2.14379582529721
PRRG1	1115.1738879535	-1.61882608222697	1.07882405921278e-28	1.48888728580131e-26	1.71160371090254	1.94141981347518	0.576149755985135	0.562416373484682	2.38622502321661	2.02470932950041	0.673456993116636	0.596384549046932
PRRT3	195.51137957331	-0.769520849995068	0.000949227953228798	0.00538971791243472	0.446102429279742	0.393210914223133	0.21360205130562	0.2415866904626	0.435776565254225	0.426823015367856	0.284022153137179	0.315929540613717
PRRX1	2889.05543472657	-1.14302773860961	3.47719831597378e-22	3.01468636048368e-20	6.31136002288494	6.54767041790352	3.08684564091248	2.65794730904656	7.95124405147725	8.32740400358968	3.86318267614552	3.81202445647217
PRSS12	5369.12750193921	-1.44982496540371	1.29854491465018e-30	1.99577499666405e-28	11.2523375991516	11.4183577765631	4.55943286782811	3.55422164873729	11.7189444723768	11.2796034366501	7.55771894185708	7.31677663965136
PRSS23	27180.4985422134	-0.359906521647391	0.000366064422399549	0.00236212848900472	17.0136196772643	18.0167128703613	13.8459489716197	13.461477841016	13.5617163832516	15.317886637698	15.4537333093649	14.4936344818568
PRTFDC1	281.847012067578	-1.54065295669979	3.88273561365533e-11	9.92703198009232e-10	1.23217172917815	1.61582254769717	0.504149092325076	0.366134790044955	1.77034820608824	1.80446999496111	0.785033509206655	0.75384265017354
PRUNE1	405.77724088845	-0.563802770286601	0.0019635910264652	0.00997280083850613	1.07127579582332	1.01201436864082	0.654767963366246	0.711763815007924	1.03638480546514	0.990915264699674	0.576658017373393	0.637524468939658
PSCA	95.0170319143418	-0.759751842192949	0.00806192438020004	0.0318839232152309	0.707168963928857	0.570239133020623	0.347007633527857	0.318229303497017	0.79534108546399	0.862487938775348	0.680469741891157	0.597870188851002
PSG11	185.495712522518	-0.901324141106917	0.00146112012934377	0.0077466286747842	0.973622119400422	1.07409899417803	0.661207528692215	0.319789574234417	0.442360452302815	0.504339457137339	0.963274636214782	0.88018033803242
PSG7	47.5492401216162	-1.47801727684	1.56396620707846e-05	0.000147756971118427	0.274176779553001	0.229801697135914	0.0669260281362934	0.0415839054967642	0.0721263460945799	0.131163777769159	0.134206738700247	0.123393803316377
PSIP1	2601.71007834968	-0.463347451237218	0.000328422651798972	0.00215313444768836	4.58957097390752	5.16781706056204	3.45440532671435	3.57926298817044	5.07380193816323	5.47550260206397	4.08237237072949	3.62927637997068
PSMA2	4053.94715432615	-0.349674733593142	0.00453256443102722	0.0200598605790717	19.697512288708	20.9317143032246	17.5533671813187	14.3882480957748	17.826668360202	19.061137629283	17.0505318159756	15.7184142452585
PSMA3	2899.00010149942	-0.391329719556447	0.00262441885510339	0.0126950160998832	20.9959522819019	22.2475726184232	18.3227012947422	14.6725887886071	22.0777064146433	22.4704898758495	17.585610117965	16.7102879263822
PSMA6	3483.85877493131	-0.838512486707895	1.4393250017478e-13	5.09603943681648e-12	22.3437360962374	23.4340162717412	13.4587981763582	11.9558752079777	22.6848882942083	22.6356316669237	15.1892634527016	14.5767073490319
PSMB10	1085.22487701635	-0.655501127888791	1.22682884133997e-05	0.000118774946879908	9.74994937561459	7.70440223513168	5.61308464925359	5.25613302172687	11.0202823039291	9.30011159868201	6.52516898937025	6.88751621856334
PSMB8	20.834411897681	-1.04948825039367	0.00357438715819952	0.016477023283793	0.0197111710430724	0.012565228723293	0.00449069525136335	0.0019218589233346	0.0261995190614252	0.0356979688462727	0.00696830137952969	0.00326828217364529
PSME1	5539.84966637965	-0.919367750231545	7.80339889162895e-10	1.66468406954703e-08	40.9768589291117	40.113870289392	24.9153267810305	17.1582150719458	41.7417237651982	37.3224411538315	28.4218154877066	25.1936063088787
PSME2	3672.44005104334	-0.642783796317214	2.8376730635053e-05	0.000250846589437315	36.7588000415823	34.5011686164619	26.7854595194686	18.3501397982289	34.4642861346837	31.392896338489	27.8059058353882	26.7665844421109
PSRC1	428.784540569756	-1.05931666370307	2.77439690485019e-07	3.8017951507699e-06	2.25547273079739	2.10456274560438	1.19941703908205	0.788242384520683	1.50456165675429	1.79743385040353	1.04927293468026	0.910227902491271
PTDSS1	4249.24274508457	-0.505795160363691	1.04872817009659e-05	0.000102857494565311	12.1941284601773	13.3418896994526	9.33436105253303	8.61113203474035	12.9847574133128	12.5465423247459	9.60819672615116	9.20344943340648
PTGER2	1253.41759018309	-1.35516341390585	5.39505051750002e-24	5.21200416065627e-22	4.82394491180504	4.77551484398372	1.98152898801597	1.68069363509901	8.78551655114229	6.92319939800389	2.9464432950602	2.83086068378896
PTGER4	570.781223979462	-0.680651051846105	7.33867171149276e-05	0.000583512844785065	1.35493925541548	1.36095323064837	0.939372190140345	0.728997904471129	3.62712099459186	2.7771636399827	1.6142382865088	1.55906720101363
PTGES3	6956.6759541446	-0.402467536953661	0.000189817658406771	0.00134061818796427	14.9274840665692	15.6261383205483	12.3032604359475	10.8325916522744	13.240134881206	13.8582389573357	10.228474175115	9.88095259155783
PTGFR	1953.65499547482	-0.941558836625302	1.99789295554091e-09	3.96791515766385e-08	3.09208295543748	3.16028719972538	1.87686822596354	1.31244928974317	3.46440197893877	3.51568744369027	2.96573307022821	2.73436812877485
PTGR1	3314.76509970323	-1.72042734137273	1.38646319150463e-53	8.52359757504549e-51	20.8224369372245	21.6281059394109	6.36741639639423	6.19728376944533	30.4459206739404	27.8298520693081	10.8523280813242	9.4360330382771
PTGS1	5119.69879132558	-1.34653081814185	3.20257427291678e-25	3.41061551505508e-23	8.47882529540977	8.55883790573254	2.98791058779224	3.50433689446994	7.81390538586973	7.0399005991373	4.07152013285393	3.84499436700549
PTK2	6858.91800592294	-0.427954233232684	7.63764970836957e-05	0.000603383249449173	10.5501894769657	11.36173808747	8.29358786356459	7.97718214803913	11.5529975653807	11.5681295051101	9.57564494791886	9.59434091102686
PTN	3753.85821020373	-0.388296764005782	0.00136750820474101	0.00731338413172089	15.3238854519831	16.8558912079765	13.1937884382885	11.4086530749325	16.6954911698264	16.1922051061567	15.9225210469369	14.4301723358122
PTP4A2	11164.1686163493	-0.676432657720284	3.40306510856058e-10	7.72255966330232e-09	22.4576557244423	23.4437387994882	15.3718031655215	13.2516006046629	23.1267977560535	24.4830880826325	14.1161684789673	12.8566306389395
PTPN13	9257.4044163322	-0.468158373756005	0.000556180737301702	0.00337324864215494	7.99572331725739	8.47741531338227	5.33791971004463	6.44725074152613	9.1508439949065	8.68978105641047	5.73296249085079	5.52371020699693
PTPN2	1085.03468374659	-0.692826611932207	1.53678090532798e-07	2.2206155710001e-06	2.21789072619713	2.08675872574984	1.36960373094827	1.262913677944	2.35696430950322	2.29654891860772	1.51470405651259	1.40485199199106
PTPN9	2892.58306765915	-0.54246789966154	6.61905812530264e-07	8.3510038381267e-06	5.6959766756914	5.72011986229028	4.01060797456143	3.80084726633638	5.25179874813606	5.16183256207254	4.30048777384152	4.2306978351173
PTTG1	1486.98634545399	-1.07925771452448	5.10210867278854e-08	8.12791752643875e-07	11.2167341264569	11.9813459739391	6.6473085086102	3.80948519481256	5.74235017088879	8.23004245977666	5.82918742311498	5.36270364993762
PTX3	5558.2271848577	-1.73671290716469	6.48903872203774e-34	1.2906507164053e-31	27.2517844309919	31.054930851855	9.60913183556714	7.20757808569404	34.9699364962523	34.1578187423457	17.9668559697578	15.584963754938
PURG	294.799447459751	-0.77299740350453	0.000153710980675857	0.00110876854060852	0.637686662744313	0.678694384498605	0.347227354887551	0.383656700707939	0.740619563371605	0.562026129472735	0.511744502649313	0.51243673169453
PUS7L	2428.45797756175	-0.480145824734735	5.72580887505459e-05	0.00046849101654636	4.15282979441218	4.24483504841079	3.23325530690275	2.7809349336977	3.55938481952277	3.83083252101941	3.21535755437705	2.85758624711071
PYCARD	133.032673467917	-1.01824200629544	0.000135697304425481	0.000990677684065034	1.8200630895119	1.33973598064591	0.70579687110875	0.653895578460623	1.82153031851414	1.1115348419155	0.914070001897822	0.941731559456167
PYGL	2894.70438675857	-0.373799506210354	0.00909632998953708	0.0351407778087658	7.41519027508452	7.66012101596354	6.70314417257027	4.93356552087842	7.30699615526771	7.51068006965226	6.85011335292077	6.76662372001369
PYGO1	1243.83691358231	-0.415719006097148	0.00246556410942674	0.0120534781240957	1.0344694200752	1.14929329213914	0.844822722531884	0.78695987543105	1.18953434816997	1.11711318199636	0.978814585614077	0.818513849861514
PYGO2	1026.57731497396	-0.463383234823622	0.00049634757157395	0.00304725415594084	2.51334565172924	2.40826438136165	1.83290046675203	1.71418628620544	2.22363543385384	2.18556800516736	1.87072798836368	1.67942397323016
QPCT	92.0091209005121	-0.941942576165611	0.00158483206237044	0.00829201301491688	0.445292897317814	0.542266094024785	0.186879373143935	0.238156025499588	0.345257764746339	0.353171757463581	0.267677954072326	0.190412460777885
QPCTL	383.590422403103	-0.689757738797121	0.000124898233818367	0.000923086673439021	1.40323445274874	1.31297648741156	0.857757492701716	0.780580571858715	1.13486515845306	1.22278986542142	0.775868391499355	0.764584077289319
QSOX1	67466.3882457762	-0.493588623718684	4.9724402272765e-05	0.000414881271276463	167.948237190641	145.070411950031	123.504331623398	97.9793775617334	284.036392289115	244.075162590616	178.875648852554	176.383648939622
RAB10	5101.41200678201	-0.733736507221721	8.2652698009807e-10	1.75491011080477e-08	10.6054957033442	11.5142985426055	7.16630588911471	6.05662716997376	12.0186573154923	12.1221023808604	8.38244298088453	7.32766675746669
RAB11FIP2	1687.08267487665	-0.530205328444725	2.31766881979474e-05	0.000210378998575328	1.97473020321681	2.11530181598273	1.45158742829621	1.3667964602153	1.87309816568974	1.89982598387322	1.34933814153843	1.09263032816565
RAB12	2401.86041752068	-0.454403364255055	0.000120655125614662	0.000894660402378454	8.47996481037538	8.56467373697984	6.66877906753629	5.76321504689284	9.57473249420596	8.70736952479644	6.88687298964502	5.9956442116901
RAB20	69.3286523097745	-1.03434430990288	0.00139499883593047	0.00744274526862312	0.439245149014972	0.424727602291029	0.215077916439053	0.117329922206259	0.604890577064448	0.539440890793245	0.244600550081838	0.230449171301874
RAB27A	720.174143494621	-0.928863693957818	3.58348513592953e-10	8.10478870626203e-09	1.71291659774324	1.6637818223649	0.867757440851462	0.859164633033308	1.85726187855308	1.79116339059708	0.86060862338464	0.815820182185813
RAB2B	911.483905739824	-1.0053860414531	6.10998478833956e-12	1.71803626324933e-10	2.56265718900538	2.7861701068371	1.37818868821904	1.23004377166335	2.46372207359586	2.83988553738622	1.41980328001044	1.3138612539941
RAB31	2924.91535644653	-0.804154762020983	1.66084814506227e-12	5.18775315518873e-11	5.95336905110007	6.28744036586821	3.59030715913812	3.36394206798839	6.58009246604829	6.25779953561505	4.01565297221873	3.9998447854498
RAB3B	38697.2518776183	-0.375537471255345	0.00254216996745838	0.0123634839301958	22.0746683321493	22.5990884426846	15.7726028805627	18.4661618798419	12.5895810631017	16.1004594889923	17.0579085723256	16.7403042931138
RAB3D	591.547251875925	-1.11885232695594	6.9648271719806e-09	1.27124544535813e-07	1.26097852559957	1.27664949979727	0.459651657599211	0.625459558960952	1.46654919637393	1.4433102311393	0.689882033094027	0.737204527027589
RAB42	41.7323960865686	-1.34139103991723	0.000114703960061547	0.000855692807408947	0.306902574025958	0.356288175891882	0.0955005468759551	0.061306290426132	0.359837193000621	0.365258298514919	0.165288961212428	0.178725402963556
RAB7B	43.2799752156403	-1.06359349972907	0.00277861301915809	0.0132888051924021	0.132876210565786	0.142997701784486	0.0197123302857925	0.0543664996387595	0.265949662773609	0.209918332916446	0.0494114105062899	0.0737816544287458
RAB9A	1095.81046014606	-0.547326731754873	0.000132714827695696	0.000971828935887538	6.01759264583445	6.52852627769395	4.61655709349484	3.9238474725933	6.81697437935843	6.57702967636619	4.91084305021688	5.15149712320852
RABGEF1	3667.27726328554	-0.622234478816445	1.51504723752961e-07	2.19389870316788e-06	5.33625387564269	5.4455534100734	3.8121174348797	3.16863514736044	4.74301556877125	5.32769527281698	3.59612837681737	3.67357174525831
RACGAP1	1825.39326835711	-0.667617453327917	3.46381637967529e-05	0.000299193859370752	4.13181512922475	4.32951691707717	3.11172810583067	2.15215679222072	2.36393044846241	3.48574822394321	2.64566798317473	2.47883398953759
RAD23B	14556.8516308086	-0.41425025372337	6.00497698346796e-05	0.00048749888176113	23.9994975098605	25.0931864893274	19.5063829035223	17.3610204281685	29.3123118192953	30.5791470455954	25.7928177294026	23.843165980385
RAD51AP1	343.409111307349	-0.624744921318243	0.0111412417862097	0.0413516177712641	1.13017436189131	1.31983736633001	0.985844875982795	0.540246486148307	0.606917998066716	1.12761375050479	0.703170755948921	0.583323446820479
RALA	2305.35949973153	-0.892751283566347	3.65626868942377e-14	1.40087915083446e-12	6.82486220051582	7.2019167695096	3.87990270853564	3.59651207428358	7.64289075695697	7.48799137165957	4.74511566075312	4.41343972983281
RALGAPA2	828.063762825972	-0.408607539716733	0.00564580253472258	0.023825110540444	0.707124444649645	0.614421130636428	0.490054350616147	0.493213782100023	0.609005170797678	0.647192517810826	0.473136733937859	0.47460596698754
RALGPS2	5248.06274138788	-0.80693003725878	3.12054411900582e-12	9.17507808903342e-11	5.47078828252011	6.09054464807252	3.38996657723794	3.16467278570908	7.03327415113841	6.93470251388774	5.71896246817826	5.20636655235845
RANBP1	2186.66869814249	-0.481737217232226	0.000221408863489043	0.00152783412178026	8.75524832680627	8.07058631409405	6.66790752382315	5.3480566459364	7.10312474098966	8.59264382822046	6.48714586334164	5.91647012427797
RANBP3	2456.97022398184	-0.326015422077947	0.0117876695300264	0.0432758497268205	5.84891358992085	4.72992056198912	4.30313626970395	4.09140551736823	5.8046501782084	5.50347780486712	4.98089232277033	5.03926348862286
RAP1GAP2	1665.79759911895	-0.999832668132986	1.77146085880256e-13	6.22311899098821e-12	2.24171132800478	2.13664246813492	1.20152861865592	0.954161492310876	0.99337118070732	1.47983298590651	1.31169199534597	1.29289543900764
RAP1GDS1	5267.96869733734	-0.552761030776371	1.74895645194321e-06	2.03218522444432e-05	10.7660286918674	11.1037082654392	8.11626054439968	6.76483916679284	10.5896038808016	11.1637976645024	9.52072690957863	8.75042323830866
RAP2A	3125.53199797592	-0.865625954157087	1.02419664101162e-12	3.2981570404005e-11	5.94151174404952	6.2390695105684	3.60549157030093	3.02185263062895	5.51389809806987	5.24003290821282	4.11783242605391	3.82065078763485
RAPGEF4	334.476082349554	-0.680815578292578	0.000653373170873975	0.00388604755324121	0.508412292684206	0.552897034438426	0.360749773754962	0.284306299045409	0.327996290080496	0.376898171611864	0.379731874227892	0.339770592979985
RARG	791.692414598574	-0.549274008058141	0.000195260270875624	0.00137266450177972	1.89615441368259	1.71683992214873	1.3012739815954	1.14240599602485	2.5818397256464	2.16202327888251	1.48585970043646	1.46783714009901
RARRES1	81.7448498436203	-1.33511193353331	1.18391021382564e-05	0.000115438955916966	0.55699946123948	0.43156932016609	0.169197783337125	0.130806378772363	0.668701050138009	0.538657760992825	0.291864301423079	0.301892642447511
RASA2	2754.76301097578	-0.529171994589951	1.61770495515267e-05	0.000152046278793884	3.66145265246177	3.89684676596999	2.82668608239541	2.40016513321189	3.55205530617253	3.543752606778	2.95193088141141	2.51387584403236
RASA3	3633.13603858311	-0.597477276083048	1.92149083574949e-07	2.72412615864905e-06	6.15239211598042	5.72512431323393	3.77718570467705	4.00043435066039	5.51261520630822	5.72495747631216	3.50248078010756	3.67762020836819
RASSF3	2748.02116297993	-1.44907139894235	9.99475836187549e-36	2.11217354444322e-33	7.47784245724839	7.70510449596762	2.68988714085613	2.73895105252415	5.64950575780615	6.06383494957336	3.18959643366295	2.83890926324718
RASSF4	421.948760979886	-1.23069770644457	2.33908997631887e-11	6.16689901163991e-10	1.66767849553392	1.50432190372939	0.594052771962801	0.665998449354719	2.31319789119718	1.71422383386643	0.947034588170931	0.92039204927851
RAVER2	400.155077687387	-0.687457351223055	0.000117529975802723	0.000874363543856891	0.752760175598022	0.748717828924368	0.448291336061755	0.455291116126528	0.972162762653822	0.805604339653625	0.515681588750328	0.555403909316503
RBBP4	3915.17875901856	-0.419268050400711	0.000117461743111285	0.000874336860528415	3.60644366684043	3.72429012296288	2.74786463343393	2.72245738022551	3.84702221284731	3.85660323416952	2.68066718075216	2.58918093409921
RBMS3	7132.04768897839	-0.818060496142367	4.55693209990948e-15	1.91405300159241e-13	6.97093584067196	7.32175218442771	4.10462997737006	3.94793536623536	5.94318550481444	6.05109321472965	4.95909809640773	4.5236827441592
RBSN	2564.98489136441	-0.780010227810663	1.7082969863881e-12	5.29924695892179e-11	3.08345817759444	3.01374426488412	1.78791612893778	1.73171511107549	2.44828739087274	2.8109484645544	1.65141437817213	1.64001933444031
RCAN3	790.275079487972	-0.609509545434728	2.90534778530212e-05	0.000255825708308667	2.04830478621787	2.10514933028315	1.34744697818378	1.33555015559897	2.1192391779195	2.31897064371581	1.73265230499204	1.82153430907087
RCN1	11490.7560992356	-0.755087004119789	2.21241678185252e-12	6.66435121927736e-11	37.429683935445	37.9548256080064	21.5109830491307	22.7713331916894	51.9384799602266	46.5086372409379	30.0883992967902	29.4250313943732
RECK	6709.70354401724	-0.633519198925405	2.18535146949999e-07	3.06288897668262e-06	9.24255262146786	9.72476095198857	5.71106365799652	6.38675767611881	9.71131059063008	8.39926970724373	8.00587757950447	7.26706762947778
RELL1	2887.86396286329	-0.522982276712689	2.72191266196896e-06	3.00276254103835e-05	5.44640788985746	5.63037253953331	3.93144537696369	3.75189580392746	5.75061916465314	5.19447000999422	4.58566292489543	4.16154307026874
REV3L	10337.0955641202	-0.740429023438701	1.5095510331726e-12	4.75913233651734e-11	7.50135756741488	7.84213110135286	4.54199082732644	4.5817635585407	11.7245949886672	8.99237142207923	5.37342155450862	5.75882292414905
RFC5	541.998994055287	-0.493042406719717	0.00525149295013924	0.0225337697178405	1.69865351873748	1.67774360366278	1.3531055475339	1.02563144097995	1.06365138731684	1.31254700612047	1.05684264179875	1.08914129931281
RFK	1412.00964617464	-0.911986696911663	1.80019343511843e-09	3.61088497060706e-08	4.25736173163501	4.72729317315153	2.65031027150975	2.04389866097944	4.52415180834121	5.37120480710684	3.35674944415137	2.50826280801144
RGMB	19311.3324984546	-0.674514761403777	3.20799050094826e-10	7.31670683395029e-09	34.7751211835175	33.3558597974995	23.2070454556026	19.320085484477	27.7973445922253	36.3322232501599	27.089232991164	25.5551289215935
RGN	30.2668671499579	-0.97865700496164	0.0060603719570115	0.0252282335237244	0.145891236249585	0.122748669666488	0.0443168719172774	0.038889992763304	0.205666805038016	0.18611491676872	0.067324701784843	0.0938279770198081
RGS20	950.106723583406	-1.54069658531769	2.90736188170707e-21	2.17249002486675e-19	3.30905593908401	3.51929791621679	1.28906099217558	0.958533052382997	2.88145140007385	3.03383839246111	1.78310846650662	1.63033376269116
RGS9	332.520249260684	-0.815771331944505	4.44106068513529e-05	0.00037493973636988	1.07474050015682	1.11939965478055	0.546074209685489	0.633252887547725	1.02813614094656	0.895132707984697	0.715309957741164	0.735881399728471
RHBDF2	496.32936799965	-0.920215444176834	4.34959532264395e-07	5.72093542123288e-06	1.28427945513307	1.10883370283985	0.69111968975763	0.531459120484671	1.35200964748777	1.33735336281197	0.59221179461689	0.618640809405853
RHNO1	772.858495873443	-0.668997878126469	8.33049457116435e-06	8.3521081597478e-05	2.47022182865187	2.60210384304479	1.68279848148932	1.47036403183963	2.7347772705869	2.86715440238323	2.05048663823822	1.7699404091938
RHOBTB3	11553.8419410181	-0.567789741339233	6.17161980252355e-08	9.62790914499645e-07	16.0893344272718	16.4563312839597	10.7397573706644	11.1155347247611	26.5175961756047	24.7161512290051	15.7439153803634	14.8407178981592
RHPN2	457.132796051578	-1.08182386633531	1.07470270692987e-09	2.24311020234978e-08	1.21511550245518	1.1208631607285	0.584569445720398	0.476593919850078	1.07140989198868	1.17071246861983	0.718662114756194	0.665341432733874
RIC1	8667.75425569323	-0.364618181212524	0.000328365779068533	0.00215313444768836	8.99615693393515	9.35080132035109	7.33467665621145	6.92484088401421	8.58217641510354	7.9856086639264	7.81665960429219	7.90035419362676
RIDA	397.433043532292	-0.459180088777913	0.0128573115518952	0.0462913652173336	2.81281084618782	3.19048543396028	2.20354995771399	2.09564785861537	5.34897453512348	4.79703206794974	2.5024711519364	2.29103024378083
RIOK3	3806.74302069589	-0.61163340826121	1.12363173619822e-07	1.67892568238975e-06	7.2392391418525	7.74118319471837	5.19021166669551	4.58097294067057	7.17827465620605	7.24121295957597	5.08264439006692	4.63229906156594
RIPK2	1180.79379815273	-0.399766602265044	0.00514593088079697	0.0222076308751688	3.31187215690451	3.52396992917804	2.45529029654552	2.67545148707511	4.11216654484772	3.94800071637193	2.54820610487262	2.73160441236297
RMDN3	771.246797782844	-1.00291313409064	6.04084749679416e-12	1.70213463321127e-10	2.80260710795359	2.6227438810699	1.32229122310079	1.30836054854311	2.47198116291224	2.41143522972834	1.16839471801511	1.11263486086186
RMI1	504.529655103184	-0.737179076300372	1.77055054704865e-05	0.000164808645208761	1.12517518312634	1.26110899833791	0.720883094059705	0.676549467794574	1.06504188077159	1.12299800890759	0.798029903516304	0.810652641038445
RMND5B	593.405761861937	-0.445723405442801	0.00420390583086709	0.0188959210244192	2.2126123764792	2.07034229928131	1.60185615770165	1.50760838714427	1.86616420795479	1.74980237976714	1.57291090790072	1.32293242937278
RNASE4	454.391764386358	-0.988563553700978	8.47622445051327e-08	1.2881004010471e-06	2.08459811941741	1.93658311859715	1.11157113772181	0.843112791077467	2.24420505865142	2.21930764205921	1.51875723746062	1.26653372775357
RNASEH2A	575.614226997605	-0.775143919425836	0.000101322246516495	0.000765577309572961	4.29004859697816	4.15877529302871	2.92218651724624	1.87115610389349	2.55399331687087	3.64485663262403	2.68776480643913	2.59033153534826
RNASEH2B	524.146614597951	-0.673569143260385	7.37480961107055e-05	0.000585697592423542	2.05757367225285	1.88901800516603	1.33572112367438	1.0939931076042	2.11158400999229	1.95095482888014	1.3061662897459	1.32478755598009
RNASEL	248.756246125246	-0.661099186949069	0.00236032309557227	0.011628292884553	0.501138945259207	0.455720337741088	0.330187342334857	0.253356181054451	0.673135668632499	0.729351369507771	0.356501043783892	0.337053943150795
RND3	16339.6303292321	-0.755016731641243	8.24004980808905e-16	3.72731350014731e-14	48.5253724720584	47.464074598689	29.0510048741232	27.5973369726852	69.0579747838285	71.2323515361497	38.7268809652906	37.3727955113057
RNF138	648.28796537986	-0.468820980931226	0.00529284251550474	0.0226680478221031	1.28810865804753	1.41323132237895	1.0795475204452	0.861589240649456	1.20988381527597	1.24025661697333	1.06167232788395	0.87779830486645
RNF139	1947.70303605785	-0.457455958237564	7.77843952071473e-05	0.000612359688694218	4.50399280597546	4.43137751644748	3.3659535182972	3.12449760564209	3.79583693552512	4.12774400084064	3.27806757858801	3.31889289898557
RNF144B	324.940286502067	-0.65215430009335	0.000958428154618226	0.00543511144285598	0.525057632663357	0.520000603902348	0.361120586025327	0.287285428588093	0.785018133618214	0.741226778803872	0.538590261501543	0.519069257178404
RNF145	4915.56073813974	-0.556680487433979	8.76632652490435e-07	1.07590350498486e-05	8.54338078818053	9.26722226993848	6.34950655108314	5.72913771470344	7.99127306097692	7.99260802517642	6.15101942349271	5.84429488680684
RNF150	821.225567887324	-0.888935554036295	9.18752650148871e-10	1.93252404249821e-08	1.53706475730007	1.48879773553601	0.784250713400413	0.807816465324673	1.79594349297864	1.35593525117178	1.10353361677237	1.08190667929283
RNF157	499.0410895755	-2.08527071328114	4.75857420108483e-24	4.6637475412806e-22	1.12159043604916	1.08792105428489	0.286189355986538	0.178769757286614	1.04354992206802	1.28969289933749	0.468929688150153	0.438211457051662
RNF170	1636.80544748325	-0.542626688547301	1.842791473334e-05	0.000170128018271961	2.24001349430517	2.4138603395289	1.62973937976047	1.54733101925624	2.36514636118541	2.27563152488834	1.79574418915191	1.57020366041829
RNF181	2559.01718156428	-0.604756221440572	2.03708890365237e-07	2.87595275802697e-06	28.3037333907779	28.3382072066048	19.887798343129	17.2345168377697	25.6406615478983	28.7205492900787	23.0792791860509	21.7112050004398
RNF182	397.610263669882	-0.50711495461568	0.00472104465942364	0.0207312107203587	0.79362103339179	0.828660894738794	0.59151304713223	0.532484890334539	0.843537228048072	0.874981179921686	0.944446590863844	0.735505267517318
RNF26	1143.421153686	-0.367914621185873	0.00656896048819831	0.0269636390297063	3.21141640901097	2.81425645497888	2.32897505959534	2.30309838518083	2.34705886347581	2.5333912583466	2.28872416403686	2.30153840482792
RNVU1-19	146.957190396652	-0.831607667223611	0.0061562393362454	0.025554367305474	5.19815954613178	10.3486543810326	3.26695198423391	4.13228055255527	7.78282599472002	11.8906864951791	2.59319028740068	5.66674277902696
RORA	7659.89216144488	-0.737182727280123	1.57512466471885e-06	1.84127580728803e-05	5.48859077318349	5.47145246450705	3.87842570195919	2.60268563400972	4.22070154264305	4.79039128550821	4.77525325739416	4.37515189847109
RP2	2309.74230782963	-0.653892205132235	4.30454875838969e-07	5.66884342329314e-06	4.68284231840672	5.0113809479971	3.35555813820693	2.77297300585418	4.5885585542034	4.40566273978935	4.27401787743214	3.76777587336348
RPF2	1421.58819848423	-0.474707068320015	0.000619424909484964	0.00371023999148988	2.82423884258349	3.05515663285946	2.3052717522552	1.91670041985397	2.67592363283547	3.01248087219452	2.0825470497228	2.07388943968969
RPGRIP1L	762.946772166484	-0.530759754775405	0.000723047726850123	0.00424445334446524	0.63455239635094	0.607914017471257	0.395307320736144	0.446497152219125	0.519423037352648	0.596180431896498	0.419008182183687	0.352554013931936
RPL39L	323.634162708341	-0.871516397878091	0.000304875930567882	0.00201734195740245	4.49936018398441	3.51864137671793	2.58691788225255	1.50689899364163	3.78571248852432	4.0197260014067	2.68023181210817	2.83351231259983
RPRD1A	2287.66538460976	-0.624990980055311	1.99547358283009e-07	2.82309416399341e-06	3.4156808083341	3.45791778476293	2.39109478167469	2.04823830520153	3.12522502335667	3.47321754174326	2.66524407576564	2.17183744425532
RPSAP52	128.8434718271	-1.43242472137947	6.61534530926825e-08	1.02606129940198e-06	1.21343185953839	1.04455522822448	0.381858954587621	0.317765277099383	0.615941791868517	0.576318983797483	0.505176760566828	0.440028995903371
RPSAP58	841.492279776103	-0.452831392064277	0.0113151974418981	0.0419052698252112	4.44997604615593	4.83121283386228	3.98272797613858	2.76113600042024	4.46573873895042	4.80457823192067	4.73816507100855	3.87758233457295
RRM1	3952.34413931768	-0.378850281355532	0.00137055512573995	0.00732678184807624	7.8841879321026	8.50650619512847	6.77523854402393	5.84340470737667	5.27744436080402	6.95846175292476	6.36250549554663	5.64568716654721
RRM2	2636.96806824018	-1.10950182791061	4.9382525349013e-09	9.17443207892034e-08	6.7731205646026	7.2013548627333	3.91894706087776	2.26606941575406	2.32500513637093	4.03947931424122	2.81867587881144	2.47444990779411
RSRC1	1066.80831182056	-0.397125976352144	0.00406343134380201	0.0183621479869436	4.42386249648887	4.73763849707195	3.47720291938947	3.4409511792195	4.74244314340497	4.78714925181902	4.03253477084257	3.67613522198751
RTFDC1	4158.96522343896	-0.381182138060096	0.000222531369002122	0.00153323319702175	18.2006974706146	17.1843481491308	13.9235184547545	13.2186758789548	18.0134086395259	18.6286657350291	15.5260832084997	14.2747370508466
RTP4	129.502396802282	-0.87599613812316	0.00147762501372628	0.00783106516874921	1.24355847936725	1.01782357402414	0.665562028044225	0.440086050309228	1.46159390015534	1.00095551024148	0.916821262871595	1.04078231074615
RTTN	1378.03860948045	-0.535066016812072	2.03522334992189e-05	0.000186999971519658	1.51344941842307	1.50726943827716	1.08695769241441	0.987714057234327	0.996780473591092	1.20580447293395	1.01743909875931	0.932873485223899
RUNX1T1	734.435330822019	-0.573931571298684	0.000191033212037053	0.00134849905678556	0.684661156626929	0.607397641496287	0.413594716375907	0.436234618174558	0.806172172107875	0.71665071686	0.488368385312554	0.512232199166828
RYBP	1898.31879450926	-0.782339719661947	3.4873839220609e-11	9.01852151928751e-10	3.57272997475084	3.53017351490502	2.04792141803326	2.03413703089934	3.6447973174601	3.69728506709517	2.12438866935174	2.07057403232552
S100A2	116.599470932871	-0.796339222368425	0.00396637927460316	0.0180138615476856	1.06833873817732	1.02166910128087	0.642749596898135	0.449916985244431	0.675536351932559	0.962624093112338	0.781872834766667	0.811747330034349
S100A6	76163.3550554919	-0.373956554224847	9.17158561197115e-05	0.000703605759511684	831.847245266424	818.759596196362	675.745580069499	599.763594808668	859.317822710149	793.842181032197	797.191029901033	789.592250146408
S1PR2	1721.17674301849	-1.00715500005136	4.57112580118238e-15	1.91407047866847e-13	4.57142896199899	3.90181723378373	2.08043342969211	2.04455224164166	5.40734699275417	5.13835720136569	2.47600115865458	2.46321183274941
SACS	31230.8944906267	-0.771804328295751	2.62594499856e-12	7.80569364956572e-11	15.5540972319981	17.0692254227057	10.1198506747689	8.87823461583208	10.0033038028102	11.2509558256113	9.51663143256433	9.05086995587215
SAMD12	1365.49978301108	-0.509665782899817	8.67949379584553e-05	0.000672161576312952	0.987250335737978	1.02361484634872	0.695129074216606	0.705396661556441	2.15922895565486	1.82910752065725	1.17103300242211	1.18339541033634
SAMD14	463.212982280494	-0.570846964137169	0.00113477328894891	0.00627445460769306	1.20946380244376	1.0154272994093	0.732952227493126	0.725494237308472	1.0948319200978	0.885253294400703	0.762061560428747	0.832239051283033
SAMD3	300.330948605985	-0.713647101136831	0.000286913880704685	0.00191346658606058	0.978765506538694	0.91894736290986	0.5448868579811	0.562599178148466	0.380919257552375	0.400821915216603	0.487173876411634	0.512753555094734
SAMD4B	1527.91133062985	-0.396708478843727	0.003251370167683	0.0151813997781992	2.75899688919322	2.32680504230007	1.88570443659876	1.93887319624784	2.66538663186168	2.49970847309082	1.99438916567492	2.07551059244179
SAP30	485.768173890571	-0.488163474668348	0.005349759352106	0.0228683613265593	3.53596394361883	3.21189453424625	2.63197317431361	2.12333967329227	2.92298769445094	3.61557861713543	2.92531292936983	2.73305181507095
SAPCD2	204.142576642605	-1.07126920729589	7.05662682842038e-05	0.000562741025084821	0.603943051885561	0.385485690842352	0.253835833578032	0.158718906114974	0.268446244034771	0.361151354483286	0.22596544638451	0.238261680557425
SASS6	341.863029519276	-0.498670901718298	0.00837536691248968	0.0328053395573191	0.635215661910176	0.676457715176444	0.45724109989891	0.450595807007022	0.454186380216662	0.579385203633521	0.49308131292096	0.362282584945111
SBF2-AS1	6271.03140560304	-1.03235635391489	5.78811582307587e-20	3.8754587379753e-18	19.8382434183703	21.0700957949315	10.6342624814715	9.16285211939387	27.9519618060704	25.3936318950571	19.0472880860754	19.0176346571329
SC5D	2573.31700867968	-0.358047108067269	0.00157439740359661	0.00825018399211318	2.67123016979579	2.63132297695026	2.05186829888642	2.07306878915044	2.19977319921192	2.24364963589764	2.3725889972052	2.14059206751053
SCAI	2503.78773778679	-0.657057308320687	4.56114188257544e-09	8.53242655073759e-08	1.63931377547445	1.65798381670949	1.07313976815443	1.00642587332914	1.8590409477209	1.84212750539486	1.46725006898913	1.32193490464299
SCAMP1	4317.19923047394	-0.578267887939413	2.13687098445806e-06	2.44097804601312e-05	5.3008032370809	5.55365214388266	3.99209140646562	3.25697093527476	4.89017997663822	5.2578619988833	4.20010752613315	3.51038727015629
SCARA3	7573.44386610798	-0.558789044592971	9.06437757185318e-08	1.36978443194765e-06	16.4357040836264	14.5094054276561	10.8204996304532	10.0998421968998	11.2918169466932	12.3147379590982	12.1022195220628	12.4446501192873
SCARB2	13884.2460740144	-0.921052141920686	7.06510816849493e-21	5.16516691777805e-19	25.1115968560566	24.9709384271472	13.8827298174585	12.4116237549689	35.0682367163173	31.4122782753624	17.4599594910375	16.3466851346129
SCCPDH	3066.26033440308	-0.328895745712269	0.00377965110826011	0.0172701963646007	8.9661583221164	9.11752438655966	7.69324292917597	6.73092335802078	8.55234870346204	9.34626898620002	8.32511964504637	7.80767238472757
SCFD2	1254.5080629376	-0.361855019179231	0.004413770974574	0.0196952333985858	3.01794370364038	2.82430501370691	2.31479433388252	2.21234312959741	2.31071256072422	2.62884254802141	1.94846892674401	2.00577439603641
SCLT1	1209.16634850557	-0.505838254349646	0.00062914240746538	0.00375514168621768	1.66123220081374	1.66790298646631	1.31754626716053	1.01808643617782	1.32254936906385	1.40545157637514	1.20796841602602	1.24231447865732
SCMH1	1546.17103686981	-0.420721561678166	0.000871124789045058	0.00501964508170095	3.03095393760273	2.99613119487769	2.41536932520481	2.0829761202018	2.84775434569636	2.67212719697921	2.62318955793369	2.50978733725259
SCML1	719.895052866251	-0.812906839754134	8.04289318758345e-08	1.23193805619554e-06	1.99765369617115	2.1268903223494	1.17029628280984	1.12844811695163	2.1705399084777	2.06409576978941	1.21323490899583	1.18746441052161
SCN7A	308.982269188944	-0.649546771524267	0.00283053453536309	0.0134941768032378	0.324835727984637	0.367869444857171	0.183608984113916	0.234071446544124	0.371947098534296	0.288503686227335	0.352745370548049	0.342707733252092
SCN8A	2233.36129495208	-0.456677693615155	8.61518559308016e-05	0.000668121474463355	1.43571909309666	1.47521536923173	1.10930427902157	1.00873152251808	1.6711051784148	1.6720099997266	1.71285011660351	1.63967924099061
SCN9A	15762.2488924639	-0.430362718372379	2.93205832352833e-05	0.000257841929946168	12.1393113544356	12.180138603421	9.69580135431529	8.36253861199234	10.9856709674801	13.0066039468928	12.2308785732524	11.4808059287651
SCOC	2936.72376352653	-0.91924315458883	7.80524129206e-13	2.56227884648329e-11	10.198867847288	11.3147248826708	6.1058637489165	5.13897443184799	9.81712423610588	9.37216222445	6.4531041797674	4.90843968118419
SCRN1	13991.977174103	-0.753128316001376	5.2207047122241e-13	1.74345756130447e-11	20.389278893998	21.1551434355183	13.0892267143539	11.4553938827884	16.3021090417249	17.5134473424491	12.4145100927086	11.6336044597948
SDC2	2811.11196366651	-0.458941899529847	0.000497185953951052	0.00305101634627404	5.9954352709088	6.28397377530719	4.14338880158248	4.70465169873776	8.72215412422898	7.38545354003074	6.10205500068243	5.37399906652071
SEC11C	304.867759306221	-0.719104772467436	0.00043943391491642	0.00276049405445638	2.92189113634119	3.22199810420007	1.67939062713231	1.87560665228375	3.96695364774561	3.59601855229123	1.64322172802269	1.69666676838594
SEC14L2	485.597008062129	-0.429914112402198	0.0102177859802839	0.0386560994079272	0.741627665148883	0.770041299238841	0.57287687975541	0.537168559993482	0.625992250825355	0.595572436434486	0.578774811751127	0.540924107094667
SEC23A	18023.4672808794	-0.429667690447018	3.51062310028258e-05	0.000302620633724167	31.8111496656052	33.7692520277045	25.6521554263012	23.0552787473472	32.2852959261607	32.6060910427209	29.3598458579723	26.8616300812732
SEC61A1	34187.0209001797	-0.45478584694635	1.90985706724546e-06	2.20587675785609e-05	73.4167978907914	69.2536802259814	51.9397295655141	51.9719137463636	60.3749113187408	62.9209833627783	55.9497082953051	55.5760892560741
SEC61A2	491.107180366865	-0.431299653773892	0.00963486404386972	0.036863235132486	1.05961872957462	1.06391608078826	0.776138136020326	0.775903342679338	1.05126286987392	1.02472604032435	0.77862853043523	0.825572528782738
SEH1L	1585.73985917888	-0.677492962754098	1.59611895305249e-07	2.29410295855845e-06	3.49873205675546	3.82226649714748	2.32968008210948	2.20634948515535	3.14315991466677	3.85414884264691	2.38874380634931	2.24117944264185
SEL1L	9229.37309838627	-0.640264266256426	1.5229956001464e-09	3.09287019399101e-08	8.58189031090341	8.64146483669168	5.37035072804761	5.60979748509643	12.3156125484091	11.4804869810757	6.6806723145522	6.17486842845558
SELENBP1	852.142984777406	-1.0036648091299	1.17226320209408e-12	3.76599995447088e-11	3.86002036949654	3.79908056167306	1.88163335401825	1.84348804583287	4.8579855087668	4.33549576183831	2.50929663734957	2.15533999906726
SELENOF	4088.8061722716	-1.12459960977332	8.8931766101635e-24	8.41120375192038e-22	19.4897861273688	20.5882795229322	9.57237645750002	8.58830172515449	20.5017240712104	19.7059421001026	10.3186869013328	9.44475794998495
SELENOM	2760.993170168	-0.410223406596239	0.00146024366923734	0.00774501789271964	32.8511197425706	27.1487980742738	24.1603155279771	20.7927823632013	40.7201870119827	29.9668828227156	29.8076317350121	33.8743480915756
SELENOP	336.516890262792	-0.730108520629081	0.00204134775254433	0.0103057963244353	1.25009036684723	1.29649982318845	0.932828731948528	0.534449318584005	1.70673573747775	1.73342700923122	1.24499815129707	1.20760663217417
SELENOT	4563.04778588524	-0.659966023228225	3.88541267628789e-08	6.28590986205667e-07	10.3354573289777	10.7071416921278	7.29265122658267	5.96757044502612	8.99783727145407	9.732862362002	7.61283132082495	6.91551089591358
SELPLG	106.092629291494	-1.14350220251799	4.18734323988864e-05	0.000356187530311282	0.387080548842453	0.338817527739537	0.130646786725829	0.142420822066337	0.361258963518943	0.404643754272352	0.166470240079595	0.135493842219169
SEMA3A	12972.0021344264	-0.81185874076935	2.1948576874127e-15	9.57595168459894e-14	18.7853729718493	19.5731982218233	11.4534406408212	10.2878333407295	15.1612972456447	19.0616451163631	12.1099638133423	10.9587287521921
SEMA3B	615.484800120052	-0.635032806242164	0.00210990321367629	0.0105886608404348	1.7899489538394	1.18721280033788	0.82639233886903	0.99422214921147	5.01367455754029	4.19925267127945	1.48251212825887	1.63921857929454
SEMA3F	529.51238972684	-0.78207469851604	1.55266819432313e-05	0.000147160738109463	1.28923000621397	1.00308183481254	0.618969775076085	0.657744738674132	1.56200583727652	1.39046070553411	0.765028589210494	0.780265159881289
SEMA4B	1094.17240506888	-0.635273644596515	7.52379706876343e-05	0.000595432155383414	2.33773469371833	1.963236095862	1.55664256524393	1.17397134343199	2.35557399453268	2.21569086363916	1.69268937523556	1.83531188743904
SEMA4F	889.438235507909	-0.609923822623153	2.20769216323414e-05	0.000201206445469958	1.21070158675116	1.10820091257742	0.807010785167154	0.696833184166777	1.33269979225283	1.28500247032033	1.00770427429177	0.976361856601389
SEMA6D	833.444849548074	-0.787803878511863	1.53126740802559e-07	2.21501515438996e-06	0.953502052903732	1.04835254335124	0.567088532627546	0.568460345384928	1.36631097417041	1.08377797242985	0.611388396895378	0.675189136077974
2011-09-01	34768.0057554303	-0.462793495839031	4.4900372140645e-05	0.00037860195336797	43.9513372561926	47.1685718538714	31.7197880573654	34.1174277892602	43.5579728672928	46.2091852193417	36.589681249722	34.3913717788223
2002-09-01	21029.2660075837	-1.47707123991099	2.83968037279816e-46	1.20020865756547e-43	45.0158236607929	48.3550591106571	17.0113268360321	16.0058873191162	45.7319796858911	47.2895444772534	19.8865853022849	17.8975318692625
SEPT7P2	719.050565464922	-0.4749407145742	0.00283650414315491	0.013503596809634	2.33728744656431	2.57717856887592	1.90640351856022	1.61009833464561	2.50044222020481	2.37710998395659	1.83062244500229	1.99392053456245
2009-09-01	21398.8560069113	-0.437284121572892	0.000104453165689538	0.000787035691337607	24.0304542240712	20.2829052393706	17.4526646944683	15.1849628826937	18.6394237071323	18.3158845527262	17.6004479729187	18.3654722560841
SERP1	6431.75143207515	-0.472923886923282	8.5576169740766e-06	8.56711839928838e-05	15.3005559471826	15.6193747898373	11.8679343361688	10.4064772280066	17.1437124957217	16.9086378011568	12.1221362328119	11.234828895019
SERP2	81.9713520010095	-0.77413799367577	0.00894755240474503	0.0346650376036026	0.929081090588972	0.891843939150567	0.452331170776265	0.467133196414498	0.601947039056524	0.511438352857549	0.552375992341726	0.565552170637689
SERPINB2	6750.64799550425	-2.57026633163164	7.87357209867015e-61	6.98122837326334e-58	33.9927172370351	36.629756344539	6.57417526024024	4.41989714598682	26.0705036665734	26.8951404173067	9.34440751470989	8.24323017187126
SERPINE1	45092.7532215199	-0.612818431296021	3.37209309034108e-10	7.6651359742627e-09	115.407870142151	109.070208583918	72.3108585962365	73.8413911049285	103.111291253514	122.537850369293	89.83736449434	82.010986727015
SERPINF1	1135.16423731842	-0.47581307101042	0.000449382256679391	0.00281253818676019	4.98636022577558	4.3550316865761	3.35802214332206	3.28828216376177	7.50394786187366	6.54904634770247	4.47373004738176	4.44383973952072
SERPING1	632.467473106887	-0.595917008036266	0.000590154537436807	0.00355855555899814	2.69704938699259	2.37505986204411	1.88463425232697	1.42254044094521	2.95336875173051	2.66714800118551	2.55551904276945	2.85002775923767
SGCB	5582.20521298724	-0.577875628516408	1.48870143971369e-07	2.1603741386403e-06	9.92677520630414	10.5842618430221	6.84473140524777	6.83221151660798	9.87357433652546	9.74764767185008	8.26875174609155	7.55348380425496
SGCE	3369.88618750067	-0.392187211411768	0.000340777999400495	0.00222014568491893	13.6109782087997	14.1036477582506	10.8664057338578	10.2423341819206	16.9006185713679	16.9522505526175	14.1290036903581	13.1222653953017
SGO1	193.585272695027	-0.663416947339235	0.00693241482769829	0.0282072534731105	0.422098009768525	0.427389474595637	0.306752359001562	0.205022412017676	0.202992494150551	0.355291043163156	0.219689424474782	0.198445543364919
SGO2	984.719668105287	-0.763662033294266	7.03951961985256e-07	8.81569470912092e-06	1.70497925999971	1.78872597534752	1.14148858020554	0.890019699211075	1.16146765482429	1.50879418268155	0.950511477524684	0.829348468658791
SGTB	2711.97709871522	-0.423080362234609	0.00149091437909792	0.00788932383503365	3.42178668846526	4.05236328589257	2.87147884930034	2.6875757322735	2.73111348346107	2.85022383723437	3.22545880445832	2.82406585021511
SH2D4A	1333.88979960889	-0.404363409356394	0.00145795698395922	0.00773613333339989	2.81140775830686	2.88481316065064	2.19083808294701	2.0978767439036	5.30490212906968	5.2162915988851	3.44635302189855	3.23616874554881
SH3D21	879.280990030702	-0.687958489283413	7.51025538406702e-07	9.34463698891504e-06	2.81274196243003	2.73161175670707	1.76642155657812	1.63130392690057	2.76882092923646	2.63935770361849	2.0209183874152	2.14520533753125
SH3GLB2	1942.0042826923	-0.395624384568574	0.00806976968757973	0.031894691707924	6.90024023168618	5.70628274341393	5.41241580936812	4.12709888629936	5.59176070112332	5.69083335101537	5.85723299081887	5.71916120274327
SH3PXD2B	3024.8022822318	-0.405106551862661	0.000493666148019871	0.00303630498043145	2.7806523468557	2.89088552517258	2.10084356829948	2.16578726601896	3.44975921440629	3.47071114888914	2.37537870571271	2.42329283649303
SHANK1	168.104329792361	-0.714020964796312	0.0038098805019445	0.0173906965200133	0.172203857902486	0.134603341340149	0.0829060429733951	0.0890306703185402	0.133518229053796	0.122275937468168	0.113803080245945	0.110619981943283
SHC3	2429.84663005386	-1.17420202938039	8.75981445291088e-25	9.11357619043228e-23	2.27693818889116	2.26156231759534	1.04539899343982	0.93763691277524	2.30241651117274	2.38964439234424	1.45682749110297	1.31976690971943
SHCBP1	1129.60493553424	-0.719499028377264	5.50114392126581e-05	0.000452509457120152	1.68350482833048	1.83820495929937	1.26009383058238	0.840020792993377	0.878514367783602	1.38270954114739	1.04133828383153	0.924610790441599
SHISA4	821.433594747678	-0.414816630588969	0.00396967002116388	0.0180167070591414	3.754544088712	3.67342487857957	2.95071391688589	2.59849159602284	3.49795980540911	3.19569427143742	3.60439672846393	3.53401119518735
SHROOM2	1534.65238841986	-0.373684819920497	0.00567566144757159	0.0239138071895345	1.57034583092969	1.40051508199706	1.25543668338413	1.03365669187793	0.837960943376757	1.11377831560574	1.46736748567153	1.46381033989068
SHROOM3	5224.41462395634	-0.826238129741162	4.41499761815406e-14	1.66795650238921e-12	3.9417884054189	4.03056096071092	2.18763829386225	2.26337467450968	2.22707839987806	2.23097711474298	1.89267553109825	1.83537621969044
SIK2	2075.06163457677	-0.582510778759014	8.60095373850139e-06	8.59777526335782e-05	2.80296711687038	2.90181165524923	1.78629788396043	1.97564003184689	2.81731465815612	2.68016736265858	1.91593766625139	1.97197204922486
SIX4	4412.42143523215	-0.433887124702322	3.66766473119827e-05	0.000314570094519931	5.25538524356687	5.34640295756372	3.97194547125398	3.86358267053653	4.87245364380507	4.54901661633296	3.83935715111495	3.65429364254628
SKA2	2270.18420606052	-0.612961228372078	4.07498686891203e-06	4.33287715424805e-05	5.19595681948477	5.88497580687449	3.88583279611667	3.31962209640759	4.05245219736414	4.4493303586231	4.04971525492715	3.62301924007551
SLC11A2	3336.64241557899	-0.84760946329849	7.42658881341211e-14	2.72947319840758e-12	4.01029226633216	4.2757075327867	2.34641244986668	2.21766308922218	3.59141842657056	3.39085005809331	2.57123523138195	2.5090280118707
SLC15A4	1512.26710832976	-0.43099654969763	0.00112305394759328	0.00621748040982365	4.08925826141772	4.08453748419943	3.31573956047749	2.74238327216461	3.70597473350658	3.75849425606609	3.53046970418061	3.18195619939159
SLC16A1	2886.14478851272	-0.494712437425107	1.80402138839996e-05	0.00016723364823927	4.59359171368381	4.89916489352527	3.41475100091568	3.29968913697241	4.66874882448139	4.72843090696748	3.84111365200302	3.24794132799327
SLC16A2	1140.07607750478	-1.53859636735071	4.13721307279752e-31	6.74166347103451e-29	2.68909278654907	2.72229944670762	0.920061302393945	0.881482106455489	2.6585460036845	2.72503642053827	1.08432195713208	1.01001025033584
SLC16A4	2494.20996550632	-0.666897867166848	1.12231984592817e-06	1.34330760320164e-05	7.73310335520595	7.47777574245538	5.40294743092839	4.10760203111212	7.36851212371544	7.99354912944891	6.75723977242899	6.31302075577903
SLC16A7	2513.66271070919	-1.49070288715886	1.46481338455588e-40	4.12741688044131e-38	1.97438361318169	1.96234934923629	0.704311172582344	0.667940973309383	2.62643157280166	2.54926344614479	0.962022887803263	0.842760628403463
SLC1A1	2171.1017579494	-0.450709512238252	0.000399899115742465	0.00254045821532026	4.29652392510276	4.50395883294064	3.51171853924418	2.92390797617286	4.6245190469811	4.1516921331726	4.13915381623605	3.85669858641471
SLC25A11	1229.77388209221	-0.357288490964375	0.0108621202997015	0.0405717141821219	5.50666466344427	4.53221204613939	4.0396678624033	3.74163352770002	4.41475752626756	4.87879823873824	4.09649446285976	3.90421248066592
SLC25A12	1409.88600261175	-0.469829301097761	0.000442802454021686	0.00277649661133209	2.6130680239016	2.76357391170237	2.09016559061335	1.78438357206701	1.99121013990726	2.16105517115396	1.89084658165018	1.84894638098229
SLC25A40	650.984808878856	-0.424426704701592	0.00589312623686038	0.0246095883168175	1.58467858329419	1.53885201169648	1.23574728964426	1.07794184017564	1.37641734693761	1.41592353661899	1.30576066265644	1.10998821569127
SLC25A43	1351.50439886592	-0.578838892399331	5.023758755945e-06	5.23828911156483e-05	4.20459821887288	4.16156797166823	2.93807368110408	2.63171853490174	4.32745243760122	4.11670347127161	3.44041928894469	3.22045675164024
SLC30A5	3212.38806093275	-0.605564470828983	2.97137926378092e-08	4.91896016433744e-07	5.3280786508455	5.38194249527469	3.67508613930195	3.34065706519957	4.88800935145984	5.0435805754553	3.71487590870587	3.25112003308572
SLC35A4	1440.28920657909	-0.508986025018272	9.0455297888551e-05	0.000696382852772035	4.02797218624979	3.56239585619003	2.81812201422128	2.48287573135975	2.99647582742829	3.39819659750696	2.76911915634929	2.69856603716239
SLC35F3	76.9091986627088	-1.1350386116207	0.000543107077355245	0.00330432893442631	0.197954936613315	0.233278436805384	0.101963093124954	0.0469932634491282	0.0934252401608858	0.101562226099371	0.0742720380328534	0.0799159830866849
SLC35G2	614.885758046934	-0.549622368347868	0.000391726684907103	0.00249439897051251	2.31530121598882	2.35993113570576	1.61114124756455	1.53980415002984	2.51248459491477	2.54428166994377	1.51583036753807	1.61590080854452
SLC38A2	64827.1951300588	-0.41429006511294	7.98797220573246e-05	0.000627030319689678	95.2902207324017	103.532148450227	75.0415882984605	74.027456802208	74.8780381720918	79.4202467574205	68.7252340944346	63.8894554005964
SLC38A4	499.040471595486	-1.03257844565973	2.94246444511224e-08	4.88089186604966e-07	1.04715940816653	1.18577360427699	0.595851686906032	0.455944905504137	1.91324432708277	1.81445264493575	1.19982067364998	1.02681475861969
SLC39A11	948.403838100806	-0.438684210081174	0.00133652069048384	0.00716750290991038	2.57163219173452	2.58682284459667	1.92842546732907	1.85280172258263	3.36768550523389	3.18457085086282	2.43603615959965	2.05765668444078
SLC39A8	144.027543098793	-1.00341801956338	0.000205694013496394	0.00143698942796422	0.225380897914283	0.209249198284248	0.119307140364275	0.0743985569053315	0.47028049688123	0.299676882391867	0.264988281888075	0.235211786064468
SLC39A9	4697.45659248053	-0.730574501378928	8.14544132037354e-12	2.25752241512402e-10	6.51246124401355	6.78425658355498	4.14289760750234	3.83017882816078	6.75707750044716	6.2738793452439	4.59004816965035	4.24385287115961
SLC41A2	1457.09545100799	-0.567532238117711	3.32996249688761e-05	0.000290004782810076	3.11955660782686	3.33164239971448	2.36562107233085	1.96855992646067	2.39691778080295	2.29512290176255	2.51680973707577	2.36403513044294
SLC43A1	786.384623602033	-0.368790385220646	0.012400440119152	0.0450486039783861	2.31019502166289	2.10711018865022	1.81584676759153	1.58962712028006	2.6296476641203	2.33697029846845	1.98360791926224	1.96853980135657
SLC44A1	3465.14363673198	-0.479974273059936	1.33290661250892e-05	0.000127764436103354	2.4222141913072	2.49964928464501	1.76724175185789	1.74983675837836	3.25157231646214	3.2629931626757	2.7132242605571	2.4260364709669
SLC44A2	6887.95015644536	-1.40835505834677	3.64066559017004e-44	1.26256415659102e-41	18.9811055703851	18.1077258587014	6.88057869582888	6.86657564454458	19.0961474029807	19.6313977042792	9.22152185034305	8.54108646653036
SLC4A8	534.304017338522	-0.604031083189206	0.000187300916002733	0.00132437285230819	0.320459353200142	0.323768311329716	0.216959563109914	0.200145550128498	0.2291297805605	0.308779323676456	0.293498880788817	0.296252269502302
SLC50A1	602.294642893405	-0.904606046705089	6.10770745815173e-09	1.126967849543e-07	3.12468282138919	2.92570729457279	1.6143015067613	1.52921302763363	3.5079937293195	3.79540048895917	2.00774565702821	2.20336680814319
SLC7A11-AS1	150.500190685534	-0.819213245913204	0.00406976557822066	0.0183846290732914	0.278717217043604	0.283467112199708	0.189519249364723	0.098202375143987	0.16623334012706	0.215388734765964	0.360779536701486	0.263062705903092
SLC7A5	3219.4755124279	-1.36999109900835	1.19682825982967e-24	1.23565665757224e-22	7.42167348893644	6.07494914274903	2.41349215687077	2.6260317832704	11.9435928727504	9.81093333806561	2.78550595741397	3.0132440267104
SLC8A1	3259.30113624215	-0.517900189721785	2.60720925642588e-06	2.89368846363644e-05	3.95831120577976	4.10946957662576	2.87469799599238	2.74314157944892	3.70717600117616	3.9676607643209	2.91662867610788	2.71749691683428
SLC9A7	4575.34745608273	-1.21828124555195	6.88535789615528e-30	1.01222245158152e-27	4.1964801955431	4.19942542647673	1.76078640421933	1.79056965051923	4.04404431549707	4.43661132831659	2.12390345156037	1.87044982796988
SLFN11	2745.48947743288	-0.591420060790544	2.36435616851281e-06	2.65639569718138e-05	4.08125261690816	4.1383028449463	3.00055752009116	2.43582804520886	3.72454683657391	3.37469178496604	3.39558819984027	3.19852188886557
SLIT2	2443.12147316425	-1.28431163382141	2.7735185232633e-26	3.26189895888141e-24	2.93341836003122	2.7292976270131	1.24021301819337	1.04330634283362	3.85338116454993	4.01405651805072	2.12148524825007	2.09816814844191
SLITRK6	1939.12449149739	-0.43711781446974	0.00237837446156553	0.0116930260242362	3.25999816351111	3.74225674491855	2.85991784460531	2.30424097189545	6.8686646015292	5.22211055785474	3.75790994723645	3.60409970246689
SMAD1	747.31049802116	-0.388037268864736	0.0109266620996239	0.0407645983896584	1.71903336887278	1.85593111892143	1.3448445749664	1.36333231542437	2.22390236957458	2.2419934723919	1.52341847056856	1.29086465785705
SMAD2	6436.71693445257	-0.550343488092878	1.39821795122046e-07	2.05107351304303e-06	4.56722716080131	4.74993356836973	3.2017544366692	3.14019849293832	4.17447879000192	4.31668209394682	3.84639142584395	3.48547940243267
SMAD4	5691.99943463721	-0.483397807692972	2.92478108251094e-06	3.1952878950695e-05	4.89290918573281	5.03275610059711	3.67100341090102	3.42148807789815	4.0398094168021	4.36579778305215	3.46746815225942	3.40661125713889
SMAD9	729.025170450677	-0.677839947458098	6.8017825904212e-05	0.000544021936933452	1.00458816101585	1.11943301790808	0.593517698494809	0.694975163707648	2.14164904460777	1.67991767977244	0.892635610845427	0.828409004457231
SMAGP	420.056832526281	-0.677718121333336	0.000368070829313627	0.00236942311588139	2.80255898048106	2.72049953765405	1.9374950105045	1.44129250684363	1.88573276364248	2.41945977848995	1.60659343039703	1.54896150622415
SMAP2	1870.20434501824	-0.619869826815504	3.07727098058283e-07	4.17034970063956e-06	4.463634409372	4.680381451873	2.99843400874131	2.90869378184931	3.56064260811192	3.82811947339983	2.67093752622056	2.65362378951701
SMARCC2	3776.63009952543	-0.43464637615476	0.00101053870503511	0.00569243481282794	5.48495686203794	5.53445818563148	3.7172377228831	4.35634207091666	5.57726813181478	5.48008679394632	3.94617287723701	3.98652149344539
SMARCD1	2092.22283450044	-0.389563421288329	0.0013049795713642	0.00701783248616332	4.71696173695859	4.38213040496386	3.37308743219065	3.52719457580316	3.64601441633525	3.74746546952373	3.20388419201593	3.1438913786254
SMARCD3	739.117620728407	-0.612757934921064	3.44681204404135e-05	0.000298260607137935	3.05058897358568	3.08857054744667	1.97962543586313	1.97209351287964	3.79974956744328	3.45078821969719	2.28323485840316	2.36793317415131
SMC2	2493.63355187717	-0.534868624064917	1.08822188713217e-05	0.000106499283816661	3.04093756043002	3.10862768760859	2.2992341357612	1.93661669836223	2.03605022522113	2.65644868906454	2.18521234677971	1.83302680314146
SMC4	4207.95967214691	-0.994045135633741	5.09748874878809e-14	1.90979322236451e-12	6.34224843761848	6.53760008031417	3.6099259072953	2.76538100763624	4.02006496701557	5.50030404391855	3.31044589322449	2.83966493638212
SMCR8	1987.34570001277	-0.606097967119515	2.99115028084547e-07	4.05770386644283e-06	1.98721015554952	1.81219092143508	1.2452289546645	1.22816853182444	1.914108697882	1.9300489465238	1.23426594526671	1.29250261254891
SMIM14	2810.65635878657	-1.50837136068881	8.2164515014922e-40	2.22255013115364e-37	4.71952653228802	4.92138411609393	1.67843993622514	1.63505416005998	5.95314322845714	5.88971555203471	2.59893014383944	2.22417853298973
SMIM15	2342.36500028333	-0.6869226135045	1.53128581516314e-09	3.10504357572436e-08	6.58069673409235	6.56660785448184	4.08084505670751	4.01956032756343	6.78081439869112	7.07259662678301	4.64268115061484	4.04166953282864
SMIM3	6301.71321553982	-0.436386120294091	0.000371697176421849	0.00238616395056499	20.0673052620119	20.6903871851736	16.7796150153381	13.3336229932601	14.0841418212435	13.5103869253578	15.4002615996833	14.9963873275918
SMPDL3A	1349.03063699576	-0.780751396857181	7.3162776748958e-10	1.57567922855041e-08	5.62943730269865	5.75961307215976	3.38162404314272	3.17259851354225	10.8177539492942	7.50766937731021	4.71813969458016	4.65025836544241
SMS	10508.3596129186	-0.632060245387338	5.28770993502251e-10	1.17047916319443e-08	44.8335209606528	46.3317808028059	30.8341761809408	27.8477462496835	36.5411832276634	39.9264913580451	32.6006542568496	31.9950515751221
SMUG1	679.928292669721	-0.523958318583046	0.00135440929113425	0.00725480620300622	1.7991625937579	1.70318259429604	1.35626694075339	1.05940015352219	1.85399046953867	1.7846943914101	1.22387471059327	1.09455898163241
SNAI2	2188.58457884249	-1.31295512540605	8.17046151593377e-26	9.20879100025035e-24	9.94020890765565	9.61279470641628	3.66222527815178	3.98440800931274	12.2800416637911	11.9788502253732	5.2224438672732	4.67139141471412
SNAPC1	1445.57777581889	-0.531548479824013	2.25531936478304e-05	0.000205042056343728	4.45181494677741	4.01588263416213	3.0024756567452	2.81133437131205	6.06453022224654	6.22558091369973	3.63574555348239	3.40358469604955
SNAPC3	2564.80972047107	-0.545278479969326	1.11381088331014e-06	1.33548689687674e-05	6.51879496622474	6.39594034971325	4.63611625523547	4.18850313224674	4.97685647889535	5.12044257206654	4.81876389879533	4.57793843083871
SNHG16	5096.79354039511	-2.0102612241322	4.58592886578082e-74	5.6386079917896e-71	20.5773253433502	21.7744804310611	5.38487138819738	4.85252180525144	21.4963733366305	24.137955736284	5.49313727912917	4.99333948995332
SNORA104	4292.71970043032	-0.655220714552424	1.19881400580006e-05	0.000116612604110174	247.298367591401	250.658628633714	184.54243986049	128.515594160585	244.339809074559	243.478997144558	207.376016624573	225.624284498569
SNTB1	3938.62517062554	-0.668941678028724	4.68158525800353e-07	6.10592484228523e-06	6.13927472744982	6.64268568873265	4.48162333772878	3.50672985323378	5.73822788074458	5.8854646552757	6.66755563336033	6.62046492809961
SNTB2	11250.0694731915	-0.823129150098761	5.35176228699406e-17	2.72114980945845e-15	9.59819259063999	9.72260978939491	5.66277807051237	5.20467230272972	5.72141505141577	6.37726794356322	6.81302899701442	6.00756585324551
SNX12	3412.94506814621	-0.492338535273676	3.52470083384477e-05	0.000303480976263198	10.0406839081699	10.4919648889406	7.90914128543887	6.67301474286168	10.3244346303114	10.8983835986178	9.29289855224804	8.42407585120113
SNX18	6439.28961234063	-1.45225585444597	1.39942634664548e-46	6.10556172205809e-44	9.34976047008625	9.29565896531701	3.52022995692204	3.19774590900699	10.8606316841155	10.5698284414431	5.01253854798343	4.76493859024924
SNX2	1796.68375972315	-0.776556940284629	2.90638839746427e-09	5.60754680109904e-08	2.05596088358451	2.14216734589994	1.32878255893197	1.10128126609415	2.21322648201268	2.46794780979474	1.55585018570842	1.56463141652936
SNX25	2069.19143644792	-0.622528878599903	2.08741100763571e-07	2.93779748993476e-06	4.93048492320324	4.98839930434233	3.42595741133295	2.98936991142572	3.65522252474751	3.93882946925381	3.61474387449271	3.41544830715192
SNX4	1454.86149645959	-0.879160106529995	6.65365399495249e-11	1.6481807743907e-09	4.63803075545824	5.17273475358112	2.73509306205755	2.52186311039343	4.66636302970648	4.49796217785865	2.56756587744613	2.37246983608291
SOAT1	5017.84120620533	-0.579315741534684	1.6487445656585e-07	2.36221083162408e-06	5.64231389391541	5.59360012210162	4.05730234506534	3.44673225579809	5.05305962021304	5.00034233593717	4.14050413488334	3.67718599264336
SOBP	207.030096201554	-0.824151323280521	0.000413947107295562	0.00261863172412183	0.288198611461647	0.284723883109541	0.132776715084518	0.164157480962389	0.310353804938758	0.260424321737477	0.152390737251675	0.170967029071359
SOCS1	265.812405075074	-1.09346447191041	2.22989737175212e-06	2.5322722042777e-05	2.27296640997911	1.74128765130329	1.01698209246054	0.714364304173237	4.38995457085873	2.97553936432254	1.46203673319257	1.86125751680016
SOCS5	5792.3175370551	-0.341365569222522	0.00215257264933181	0.0107668435954929	8.75382504374915	9.44589517012506	7.57166226822158	6.81432709541926	7.16729772334796	7.54000406495094	7.11357607965921	6.68878052846167
SOCS6	2598.48107415744	-0.747307428196388	4.79043042343467e-10	1.07091853680916e-08	3.64918359209789	3.67500564245461	2.35335849244032	1.98294827788972	3.39580193305701	3.45228178610378	2.57975047962586	2.20744419828049
SOD1	5288.78242947812	-0.380015025992783	0.000273493486866625	0.0018375555935773	41.3909219790202	39.9126188326222	33.1965768109873	29.3293316954809	44.6953218093647	47.3583081613917	37.9643435232487	37.97179641413
SOD2	22610.7591106347	-2.69752889897602	1.04602869356944e-162	1.41475380805267e-158	33.3912900266713	31.8842468389604	5.20884468740364	4.55579159985605	53.1382076256162	40.7174209097393	7.11059210822745	6.22211110083755
SOGA3	193.639242427108	-0.858964870740023	0.000338380596793382	0.00220771711125446	0.164640793042934	0.121119706811011	0.0746338286125757	0.069918175171218	0.12569029723359	0.0961309071879819	0.0649311941308489	0.0699970860570564
SORL1	958.081981318179	-1.34756292982065	1.5879409868224e-14	6.27979586162952e-13	0.800210262074336	0.863834314241768	0.370416322900267	0.255145420080539	0.982837921390834	0.83870980408463	0.502674949877023	0.515046481961934
SOWAHC	674.310713809544	-0.84474943745023	2.5282373977524e-08	4.24775289498152e-07	1.21777984062128	1.24016861587372	0.699462796624441	0.641241999284577	1.23345138374278	1.08720028024725	0.734618966134247	0.765014787977642
SOX11	279.04020215714	-1.62842423428688	4.00473934752277e-15	1.69262811485142e-13	0.314711664387462	0.333634516354084	0.102203876923906	0.0878264375371053	0.304349051471852	0.220084493625591	0.122865071234678	0.0963942163127249
SOX12	671.092583711654	-0.491440052072034	0.00258831197976131	0.0125427873616165	1.21459194973836	1.01394080417244	0.75156962153399	0.799239704846952	1.4483099386809	1.30761911198615	0.794338255572415	0.838236294002838
SPAG5	1375.24128134407	-0.825992167119917	4.11838283700308e-07	5.45020820650358e-06	3.02643860492016	3.07468394671082	1.99148519984301	1.38856875521461	1.65578970965162	2.40426166858034	1.71983319803404	1.39550867039265
SPATA13	3234.5687657336	-0.404890507770434	0.00726739006455281	0.0292708310372474	2.24927013158138	2.2441518145492	1.46555651508989	1.8806985875266	2.76313790481601	2.42339017336241	1.56917506782188	1.62473778421412
SPC24	774.934441733797	-1.11878864300496	4.19739053629097e-10	9.43018388759724e-09	2.57826567844598	2.73206907264208	1.39259322541826	0.965899761470538	1.44457462335312	2.14993172547889	1.30973210734203	1.33803968850984
SPG21	2069.60568315114	-0.695787631900017	6.56329786920643e-09	1.20282660814386e-07	8.7753387632042	8.63010417151772	5.73429225975557	4.94953118969411	9.50953086768946	9.20112786289402	6.28874710515843	5.33738087015728
SPIDR	1805.73698842324	-0.358437419186152	0.00293993419957757	0.0139224825102544	3.90118095054621	3.855991161392	2.99394512336802	3.03200110151463	4.12162863423856	3.95770402816811	3.56544956781027	3.29059973599319
SPIRE1	2452.97760987876	-0.337759888011274	0.00291738620304475	0.0138286508511263	3.22310284486743	3.27545991661862	2.68709658153099	2.4587260826573	3.88645005918369	3.94070994333526	2.59440051202382	2.56520760911147
SPOCD1	3860.93749026814	-1.13024173855753	3.1307191879688e-20	2.13853419279182e-18	9.70356593998747	7.96648116323708	3.98651423790421	3.91211603933546	5.08476655409712	5.90834789732255	4.94361274951276	4.76207991958921
SPPL2A	3794.77236368229	-0.374027227311971	0.000623916067420875	0.00373218257933097	13.6993060498965	14.3451794194032	11.0405470684365	10.5897221990596	13.9511915796516	13.984251477435	11.7775961117737	10.5131572303023
SPRN	33.8025501362239	-1.00778212903035	0.00460751146530496	0.0203383135013869	0.113208556358587	0.0997861410786594	0.0429862103188673	0.0238474177779044	0.0975291478035091	0.0962808623091426	0.00718335259667778	0.0145996317457448
SPTBN1	35142.895658782	-0.436609311349657	2.1251826542433e-05	0.000194991518731291	20.4541372028992	20.2669478279102	14.6197606339915	15.3864172309211	22.1313549940048	22.7419378136442	19.5668343726277	19.3173428927632
SPTLC3	53.6141833754111	-1.26881343109198	0.000157342021905722	0.00113013852696489	0.129753918987789	0.154399264780195	0.0496627681348433	0.0314872745318245	0.160967482954764	0.124146284178686	0.092870442661045	0.0860572757370395
SPTSSA	1032.80679236629	-0.37611185048929	0.0137850802037034	0.0489919360027163	2.76031236601534	3.28512430249395	2.33963956755673	2.29332730370699	2.63785939115215	2.86706877734508	2.89931809026744	1.96653780254392
SQLE	2231.04483218592	-0.715267724630554	1.06826098440426e-08	1.89858473246617e-07	6.22252738507197	6.00263659632426	3.50761052479215	3.82769485424046	5.39665499138018	5.22856882827671	3.98816419664846	4.04728893731616
SQSTM1	23749.223954228	-0.373496949300248	0.00153662955086556	0.00808634159352825	57.5444278433836	48.0860090065576	44.1730884494136	37.2115284289382	71.6994483405289	70.4852809082095	43.0712443595582	42.6189784076041
SRI	3107.95410310721	-0.35297078109528	0.00171605570103205	0.0088891816761618	9.41382756087124	9.59134724074951	7.91338180181056	6.98724224357225	8.73693681832776	8.65369287828823	8.57374898406761	8.04042609613684
SRP9	5944.51136001567	-0.328328620680633	0.00710921667786932	0.0287894490809354	25.6904669999639	27.8591022922656	23.4453884688295	19.2943692642999	23.3336649922977	24.5684040352952	22.3472399518142	17.9906240965441
SRPK1	3928.60410729626	-0.796321670166567	4.55099838925398e-12	1.30131613561649e-10	7.1460300928898	7.77880182494148	4.44915697789086	4.08089333275983	5.56710760656326	6.24350893082956	4.85969020745923	4.50282051343524
SRPX	4106.35386543786	-0.644940172869204	6.7579763927859e-09	1.23682856173788e-07	16.8520953513912	17.7090872263966	11.6302689494433	10.3923021562818	19.9043101860312	18.8328282170477	15.6064053911739	14.1328205491228
SRPX2	1042.75118845917	-0.394223026517439	0.0114331261435435	0.0423031002109962	3.59939741206721	3.53307583979027	2.43310848615753	2.90647493058152	3.75873772926128	3.89720695547342	2.72333798547458	2.76195128621872
SRXN1	2901.25444000131	-0.378941666484143	0.00111447006101396	0.00618514877932452	8.09675070274873	7.9062140111415	6.65829275016579	5.65834607921018	10.7373063190717	10.370526838605	6.70758081959835	5.98038859990828
SSH2	1773.34510984026	-0.393373115499972	0.00323709064556051	0.0151284212098155	1.31526471026688	1.32926826806375	0.943443578390885	1.05182401038678	1.58685543040747	1.45767250932277	0.907401712134787	0.972118077256474
SSPN	713.602165620932	-1.49012977146261	1.43013284830351e-20	1.01802877754237e-18	1.44805593186597	1.50150136622692	0.557853764179002	0.44949300054768	1.26513946034987	1.30468893963576	0.76024144237496	0.641200436410763
SSR3	25539.6648575685	-0.370628282268732	0.000598766452361539	0.00360245385595632	40.1227127432322	41.9724145315149	34.3913692529861	29.1959489866734	32.9070330744301	36.5934882684581	32.7439724400037	30.5972752597532
SSRP1	3616.18438605682	-0.799853193480097	9.74192977762709e-13	3.15970264370279e-11	10.6222799527681	10.810504511564	6.00287457918946	6.17904951807687	9.97045165898617	10.6982961302958	6.57613548608146	6.03325916131193
SSTR1	278.161354492907	-1.07055992943141	3.16686998524455e-07	4.28319165504325e-06	0.653423318577312	0.527271949989353	0.260648103426353	0.259573723907891	0.329941607052189	0.456095105321577	0.246111715428179	0.276063156897675
ST3GAL1	6456.41609271367	-0.352189517171464	0.00445372959251716	0.0198408078849784	6.68163254854563	6.95301437987652	4.98283208727151	5.64399063585809	7.28813559006659	6.39286936086579	4.46417146391255	4.46566523994476
ST3GAL2	1186.19890047606	-0.473163809450284	0.00153621001689818	0.00808634159352825	2.2983209616663	1.79359515462326	1.49575010621982	1.41201321636753	1.58554779333847	1.37946608312319	1.19000495274256	1.29233081216426
ST3GAL3	700.548019702586	-0.433012832077626	0.00566695227317166	0.0238983955307522	2.01296845032813	1.68176452895664	1.40111521591658	1.30122394113507	1.58766427590013	1.77654412192605	1.57765661915216	1.38571071704882
ST3GAL4	483.712007883715	-0.699243069256234	2.97078333617955e-05	0.000260738771069619	1.54327581191824	1.47254091608377	0.962993732190754	0.85555123206238	1.74181763537615	1.85845332131703	1.05063851904773	1.11683329346705
ST6GAL1	43.8060350132191	-1.1294315713653	0.00115409527143677	0.00635034114978939	0.103323276022377	0.0836383732149689	0.0365104207029241	0.0198284324166358	0.132429516401222	0.183593254871941	0.139685240044061	0.0713246047576279
ST6GALNAC3	48.4580962471992	-1.63412630033006	1.97869407137573e-06	2.27566643838068e-05	0.124002606091479	0.173058981382017	0.0301342712713098	0.0225687061966401	0.301255578730015	0.271561853933752	0.0671424918766708	0.0858980424458387
ST6GALNAC4	580.162511153055	-0.80625244314681	1.94715948025727e-05	0.000179395994349316	3.42240348592158	2.40290259949528	1.65620877450282	1.53215104098292	3.96661454531525	3.46080342536841	2.09821155678765	2.31290506325807
ST6GALNAC5	799.707291513482	-1.26973610619773	2.65014606977059e-17	1.38927230983129e-15	1.39419210019715	1.27317250330794	0.580163937888103	0.491416270690171	0.774890893428356	0.791175352486817	0.771810333266643	0.658124204835415
ST6GALNAC6	4158.78273065546	-0.334889802632995	0.00211071186744454	0.0105887900620131	11.2830126584552	10.7022731707675	9.33611000147637	8.11679912732319	12.5047324537293	11.2989444197778	10.5784399807084	10.7515414939631
ST8SIA2	53.4509535193696	-1.35327121274514	6.56987080867106e-05	0.000528599064171779	0.113046005963941	0.0852413556673334	0.032193366458197	0.01821708001215	0.0725853215479214	0.0963303960772584	0.0309337280434854	0.0210870031997185
STARD3NL	1875.22856468926	-0.671625535517153	7.02971780315706e-08	1.08288078915375e-06	8.4619122428143	8.89968241753877	5.77698516202892	5.05898628477253	8.15792594922882	9.207454383096	6.40829054434239	5.65397288487713
STARD4	3714.95342052688	-1.46477146318792	4.0598234169941e-42	1.22020248255212e-39	6.36807098206868	6.50754051208604	2.36826183840053	2.21560913235885	4.53365818026191	5.36678485380636	3.46150407083509	2.85248147507454
STARD9	2426.40185881274	-0.478310661736955	8.24906451725092e-05	0.00064304667202201	1.18579295672088	1.19701482251726	0.821545625604066	0.875929243603442	1.12939788902996	1.0432677283393	0.940436095899209	0.969059925470673
STAT6	6127.17429576962	-0.35080470006655	0.000429612454342699	0.00270886174591376	10.602583259714	10.5082786796131	8.4961939042394	8.06556206220737	9.4248918608816	9.75944903746361	8.59849438713396	8.53830192006506
STEAP1B	226.4803614158	-0.673464903908544	0.00226997707311385	0.0112418307996576	1.19713327608906	1.00191718860994	0.709384254732589	0.606416155804953	0.864183471488194	1.23003140498128	0.808254531533992	0.7431340755283
STEAP2	50.728832126109	-1.17808406480294	0.000466815132961696	0.00290818732073097	0.0811112024484006	0.0619412389571749	0.0254884831285711	0.0182408848448465	0.068311069084701	0.0615494135464166	0.0447230398107386	0.0380280286855377
STIL	599.390155171417	-0.534179268289447	0.00070508143535272	0.00415160052814347	0.919937415917675	0.868064352373834	0.650495049194344	0.570258904056246	0.594887693019198	0.746874779000849	0.611818378556354	0.58228578269358
STK17A	2321.17707601845	-0.532648059640565	2.87365976664311e-06	3.14712197551766e-05	4.54632922840797	4.61722807438151	3.26913936627268	3.044414347789	4.89211152513087	4.88386999687819	3.62976773167361	3.55877358920345
STK17B	4898.00505762726	-0.823746209246443	1.94819670245691e-12	5.97827572104476e-11	7.4041199822299	8.09775056553235	4.6364617033455	4.05558039079454	6.16791596327323	6.88085517128868	5.67636228468126	5.03412036618955
STK3	1321.15503594713	-0.473510126107067	0.000403971806046861	0.00256151836698725	3.11777521092808	2.93058202409099	2.36451114353211	1.97761048849446	3.24942256099992	3.10601506564657	2.28064343367656	2.50199798809858
STK32A	22.5310481707159	-0.909049453520928	0.011897282190801	0.0435836244936574	0.0469866093904738	0.0397590790032757	0.0119892850805847	0.0125424211369704	0.0408027858704792	0.0485524448747796	0.00858646742861503	0.00623262808832015
STK32B	856.834682460928	-0.989094543095347	3.1847187911023e-10	7.2758989273072e-09	2.00388439809587	2.16656811170025	0.954515529095231	1.07189162622222	3.72933477580133	2.99064283240017	1.55100025656189	1.53379502182476
STON1	595.462260406249	-1.02772154106609	6.1587765091575e-09	1.13484267420103e-07	0.896308653169088	0.990671511974184	0.405174348550604	0.474452102865284	1.15230307224245	1.07281299083345	0.674382442430279	0.600336961057186
STRADB	2247.11810915609	-0.4922331429869	0.00010572235548894	0.00079482760310612	7.17201096546026	7.67577422558021	5.71348443737113	4.82553669539352	9.26247589390488	9.34127541067639	7.15914410032986	6.8828586897462
STRIP2	770.614250188565	-0.959621002511333	1.94558931681605e-07	2.7554026711976e-06	1.25010467245042	1.12272175993343	0.706826854844737	0.472675152709378	0.982843612256127	1.25805997354958	0.959864304162495	0.937106200188089
STRN	2957.30989578236	-0.435775947022733	0.000372409645013182	0.00238826005158999	1.50342950836019	1.65958844352584	1.15676572354581	1.1720741843038	1.40803197023035	1.39718240312892	1.11836993782873	1.06841663079506
STS	1806.1532091238	-0.858161526584991	2.64785088422801e-12	7.85354894938243e-11	2.05959763973382	2.00562558472922	1.08181355164199	1.12439146758056	2.13604468330496	2.29943984400819	1.50180288206915	1.34057009630216
STT3B	9036.85371016969	-0.402297158137015	6.73447356815282e-05	0.000539595705031202	14.9286273750613	14.8107342545598	11.9389681360796	10.5838267146255	14.7772770470978	14.3044922248648	11.8979271319288	11.014115453174
STX10	1211.28616450027	-0.376086161569676	0.00502662261764101	0.0217831050636318	6.91947004563929	6.00436659061377	5.15031579682476	4.75191966703571	6.63128541386859	6.74379014019201	5.47593895678766	5.88143716882468
STX17	1902.98918220732	-0.367075660287602	0.00213396785838273	0.0106816858936441	2.00197073668836	2.06826025363661	1.6466941895633	1.50853752348458	2.5366490599519	2.32037636021416	1.88400059607218	1.77515804085733
STX1B	334.160393365169	-0.749591570344883	0.00037929030431132	0.00242663262337304	0.557183982159183	0.640716941421222	0.301544188104032	0.371054187737472	0.288008330983167	0.420764002179767	0.29746671911527	0.281759327413669
STXBP4	836.651212500097	-0.581619124153663	4.81140567897924e-05	0.000402687263664568	1.07273397959058	1.1117447924585	0.736946413248046	0.706366825509157	0.927714562669068	0.950579432767323	0.66350130514547	0.681920642756054
SUDS3	2854.89035815462	-0.323301872607194	0.00319814562137367	0.0149826531101763	4.43610755712319	4.36543129950848	3.6849025673269	3.35640078005508	3.77497984167244	3.89102760388916	3.44527041597366	3.19132704516214
SUGCT	341.975363552759	-0.829659073706402	2.39725854626689e-05	0.000217020895838418	1.64568967910642	1.73305033808032	0.847208121142913	0.956357632145201	1.84010495135995	1.87290619032556	1.21350437303923	1.20637061274084
SUMO1	4061.46220094966	-0.486647737733937	1.07373330959981e-05	0.000105233645016938	19.7339820811305	20.9897335079312	14.9525632417889	14.057274108005	19.3387158887966	20.3816166115857	16.6132034573967	15.3115280374997
SUMO2	4441.88986072594	-0.595385796345736	2.69274571091e-07	3.69739956751855e-06	31.8437296541161	33.9900228864667	23.3125832094463	20.1364517475831	34.1683305346237	34.3095492397271	25.9073631219371	23.2616449129045
SV2A	1357.00479823913	-1.2220702007385	1.44491882383053e-14	5.76475725436812e-13	2.71770424766531	2.8261484143832	1.00544893979495	1.25819227828682	2.14118554819462	2.32532621954314	1.22590304809231	1.11145364721747
SYNC	5350.45826361863	-0.41903999051455	0.000122112407061616	0.000904474427989239	11.5349190903837	11.4570938864251	9.2700347106027	7.93635154519889	12.0975554210255	12.1515292815213	12.3697420829768	11.8809768238484
SYNGR3	380.991195870291	-1.49077206970207	3.067098623036e-11	7.97740555318497e-10	2.04815707061813	1.64665782879291	0.731520087157204	0.454523643796422	1.34285415661958	1.13575388484407	0.811249526385118	0.793749345698621
SYNPO	1921.64026314399	-1.22158675860462	8.57583232553473e-22	6.9872368796902e-20	2.26867910197819	2.04020189027562	0.869517622709597	0.926612559908221	2.99952277042701	2.65775211912787	1.51657193143897	1.56963318563532
SYT1	1325.24471296541	-0.437719033636685	0.000581626938872082	0.00351497066498879	1.85438250543634	1.90446370939826	1.42531793830642	1.33977702935767	1.58012232376019	1.73660539262011	1.6059488011204	1.62494617823639
SYT11	2329.59276901982	-2.04764284246184	6.36110553795847e-63	6.61799633852987e-60	4.64131734187792	4.7360788534211	1.05912974602508	1.11552764364909	2.7619889847221	2.97977416089126	1.32957870437342	1.07664660399416
SYTL2	7033.61711029908	-0.95686407789165	4.6491557232158e-09	8.67308015951638e-08	12.0903827256282	12.2812398871028	7.45825603203472	4.77734899647002	8.08307029783645	9.83070007355918	9.67883599944268	9.20852083633933
SZRD1	5227.83739178553	-0.862473173003959	4.32786935517617e-16	2.01842872512958e-14	12.1851230022226	11.383224051	6.34772703139498	6.47777933373216	10.6618250613315	11.9829942699263	6.85316570632956	6.32961546044885
TAB2	2629.90595251742	-0.422249293594822	0.00153385725818179	0.00807843435237876	3.83924791733179	4.03463041557547	2.72302299310266	3.10014022186881	4.12285127474563	3.9371973257962	3.23301812613597	3.18059922183318
[truncated: 290 more rows]
