# Supplementary material for: Integrated analysis of H2A.Z isoforms function reveals a complex interplay in gene regulation
Source: eLife. 2020 Feb 28;9:e53375. doi: 10.7554/eLife.53375 (PMC7048395; doi:10.7554/eLife.53375)
Supplement: Supplementary file 4. [file elife-53375-supp4.xlsx]

## Sheet: 201811_List_DnZ2
Table S4- Genes down-regulated upon H2A.Z.2 depletion in WI38 cells
Gene name	baseMean	log2 Fold Change	pvalue	padj	si.Ctrl.n1 (RPKM)	si.Ctrl.n2 (RPKM)	si.Z1.n1 (RPKM)	si.Z1.n2 (RPKM)	si.Z2.n1 (RPKM)	si.Z2.n2 (RPKM)	si.Z1_2.n1 (RPKM)	si.Z1_2.n2 (RPKM)
AAK1	4384.22326605452	-0.326928965245515	0.000668305346751361	0.00896757330875458	1.89379338020079	1.91637977860716	1.61463577525044	1.94000072529439	1.49527456193275	1.59465829051808	1.66171658433798	1.73995508971837
ABCC4	12654.5873133322	-0.365341700666418	0.000129536532215032	0.00234894052538408	17.8617919379658	19.9014970321101	9.27589266272121	11.0884510448296	15.2334333082836	14.5755168568565	9.04677426485071	8.82021829367743
ABHD2	5422.72412704408	-0.458259042871901	5.29192540306258e-07	2.18144924948469e-05	5.71174677140061	5.71513864810254	4.93330735186284	4.37851186476272	4.16769717240838	4.26592486618683	3.66111956825165	3.45635908079828
ABL2	5935.443012179	-0.359918275648257	0.00327628517025957	0.0309735306695269	4.44434202462543	4.3591036461156	7.61789029376074	6.46763063101436	2.92909295766618	3.96470860366826	5.76501650252468	5.85238051891366
ABLIM3	3318.94136925881	-0.335333987765109	0.000673275319513169	0.00900784630697589	6.44823339999396	6.33456606921512	5.14905745466907	5.62463352909609	4.97392322709677	5.31878888605325	5.26023600412677	5.31046506016637
ACADVL	5930.41079661541	-0.345382826284818	0.000151639004703613	0.00269281839271215	22.4160119804451	21.3495309254996	23.4815686369773	20.2065318713528	17.165262620536	17.877128990873	17.9006399602024	17.9960146302587
ACLY	11958.1258499504	-0.379987288083564	4.0667141534526e-05	0.000918154361586247	26.3074986742698	25.1395406956908	19.7990076895738	19.3830254984788	19.057040336018	21.0909107331761	18.8244311870546	18.1342081767047
ACOX1	2493.55420985311	-0.455330143567933	4.41072841056735e-05	0.000979246690046509	2.97224659939864	3.10231800485133	2.48691010750314	2.41915375829703	2.06508637688501	2.39274241013497	2.09231327187905	1.99804860598613
ACTA2	15157.1237449334	-0.987212473674731	1.12478837839774e-26	9.64998129391615e-24	89.0239892293644	92.0994015072207	95.9513878783876	104.819122357908	43.4792945856935	47.4978872432096	91.5513996992663	88.499778533541
ACTG2	18710.026184509	-0.707835827772197	4.15849701580048e-14	7.22578335897383e-12	145.173139675558	145.623653441675	80.7440723613489	87.9884710979199	84.0901130199172	94.6579786599099	105.612816092377	100.490192963147
ADAM19	4987.1302682934	-0.633719805645054	2.11302578366348e-11	2.37750040429087e-09	7.64287944971285	7.83895454115238	6.95520350474069	9.5423321209719	5.21612367240891	4.8297201843751	6.38039519163245	6.37048572656775
ADAMTS6	2721.16453852954	-0.572989108594205	2.56590123564779e-05	0.000617932039679601	3.59777412114565	3.73812743295658	3.2518555680196	2.26010340528688	1.98438210940505	2.85408083759134	3.30015976295051	3.24330922592935
ADGRA3	1537.55276517145	-0.331756069387512	0.0034760203420764	0.0323493771089374	3.0019437119775	3.24108860275693	1.52711704513735	2.12207993749024	2.54947054357732	2.47294124517239	1.56376987970973	1.58960620562374
ADO	1110.29117811991	-0.404194345248974	0.00088506972582683	0.011117402866096	3.03039859684535	2.65161941789156	2.83729457728486	2.6861682716832	2.20211858981852	2.09702542675426	2.46452520313501	2.43458436378204
AFTPH	1322.82995082764	-0.322947200172233	0.0055534327122804	0.0458952262742162	2.86539956882625	3.07015783313184	2.34217399228645	1.86389219433412	2.43935230278132	2.36182057686339	2.03806388834344	1.94697959339518
AKAP12	3609.87098181702	-0.913796465793811	2.33350403118202e-18	7.44930461303155e-16	4.54353767600438	4.44504162758001	8.63169394742378	8.23248376469002	2.19307895877457	2.52164531523804	8.41776269925221	7.93067574240914
ALDH1A3	2154.54950885118	-0.66909417960039	1.02053748581653e-08	6.57695683934439e-07	6.03331981239844	6.26344828820036	7.19979337761914	5.1371069383097	4.22965825030228	3.43284266193046	5.26165409089437	5.27846508414779
ALDH1B1	2912.25724866997	-0.731451358467414	9.14311236235318e-13	1.32113161471602e-10	10.2478419528071	9.55278812708291	6.08669335889965	5.19569517043598	5.69527335762221	6.19767770746204	6.30327959057998	6.22332299790321
ALG10B	451.850681594335	-0.529871071122244	0.00109316577651476	0.0131285097237254	0.41501032351573	0.483884325884023	0.649888006393167	0.597591291625488	0.267252519161271	0.331685252994771	0.401222876840896	0.314664319783743
ALK	155.719073440787	-0.852451313288726	5.94042489275337e-05	0.00124685340218388	0.334460660452324	0.257955072101735	0.175619310309696	0.0990385353864618	0.0777972031794639	0.158479221444127	0.167353196856488	0.177460679441654
AMMECR1L	1766.43192483304	-0.325190745770079	0.00258007413676609	0.0257015077470161	3.36431164343436	3.47347001411306	3.94322517577981	3.70705983154097	2.76396084171605	2.77134364051567	3.23748399462331	3.09837351943218
AP3M2	1253.51209396963	-0.396622891543961	0.000576053239408764	0.00793923977646998	3.21364748488564	3.26039547068376	3.84533007757349	3.64690203734369	2.50856528144983	2.44524204309004	2.88998345084514	2.61105747194829
APAF1	2646.74623513887	-0.354848343552445	0.00055550369746523	0.00772583511155543	3.33573850561355	3.53067453326587	4.26262802620955	4.27342927634058	2.68964665884903	2.75877523966659	3.70317925885836	3.39494935557139
APH1B	1877.8628957099	-0.43129341041066	5.64010089304663e-05	0.00119662542440264	4.23824326621912	4.32934932908219	6.49284306468316	5.2824934382713	3.14773870786305	3.26500878351798	5.12062882840009	4.93533858444208
AREG	77.9604403628246	-0.604066765023725	0.00546620627576742	0.0453798687005153	0.625584725401944	0.739238242340808	6.14990056060313	7.36041877926736	0.357722162477498	0.314237984827836	0.845500116529446	0.917986988432261
ARHGAP10	2769.59683822713	-0.401679210931374	0.000163361708021664	0.00286760379285599	8.42389955334274	8.74827278393189	9.02160523290214	7.43803145465671	6.19983234347455	6.94145911024984	8.78595950122599	9.02152276322217
ARHGAP24	579.488035152989	-0.676652830170694	1.77866779970843e-06	6.40833934031435e-05	1.01771186568164	1.07325418203507	1.08359102110197	1.27053747090708	0.640123214712554	0.625968606723828	0.749875140912873	0.762224144106577
ARL6IP1	5234.88361985357	-0.412604514864396	7.61142501166444e-05	0.00153424421637471	19.1288345135826	19.4310401262478	20.701497136206	16.831627212912	13.4886665721852	15.7905848363086	17.6031010176632	15.2612058926267
ARMC1	2127.05745009014	-0.347560113612193	0.00270640363022966	0.0267271961382464	6.26827874535756	6.76758348010157	6.7405495999492	6.28028285230562	4.78889836950482	5.56428787842651	6.32383446881468	5.73456037903159
ARNTL	519.264511448313	-0.46738742523567	0.00126291081236623	0.0146418722308709	1.72566046812716	1.74846592071462	1.83105945801275	1.66676593736629	1.21346467105381	1.25874553511516	1.33738445019166	1.22837330180297
ARNTL2	6017.82739109732	-0.494815210205578	7.00517082029212e-06	0.00020329805465148	7.7181305399499	8.06015047813945	3.80504378684937	3.08201156957777	5.05616211645385	6.1880101621937	4.22950345507288	3.71784772118133
ARPC1A	5270.29413488384	-0.419934503399977	4.0620227789801e-05	0.000918154361586247	31.1760556655746	31.3025693833017	13.5235277480531	11.6397598965878	21.9048372154859	25.3137054564316	13.1054926429838	11.3989314670601
ASAP1	8310.85960884858	-0.345223655008677	0.000302032624006498	0.00471759977420266	12.0913027555213	12.2529065732837	8.98841657767515	10.0507326966756	9.21894269612669	10.259929389818	10.0255657740966	10.243727331318
ATAD2	1389.5848273808	-0.482208857770052	0.000517289745442951	0.0073129107473691	2.33670623837523	2.55125699430433	2.05426340036664	1.45351914349407	1.46832200393352	1.98864095697738	1.92261149815936	1.77933780342394
ATAD5	421.828286068001	-0.566315221878347	0.00032883667583401	0.00504915106171528	0.64679446245035	0.59957444040111	0.446372397962371	0.317000372335499	0.370765970093211	0.436665792505324	0.433831944325776	0.387524750281091
ATP1B3	4298.98995245847	-0.482574310609321	6.06721686903811e-07	2.42106645236297e-05	21.3921120703452	22.5601806533243	23.4731160231463	21.9257287406404	15.6932264898932	16.1294949166883	19.7569447960662	18.7998674080216
ATP2B4	21956.3868944369	-0.523461396929967	5.12419610328187e-08	2.76928503581694e-06	23.8545379589331	24.4824026970037	10.2174106432027	9.86057360119277	15.8459471520862	18.1015539710488	13.7020708630719	12.924008347846
ATP6V1C2	22.0019769044958	-0.72572183900962	0.000222031366056034	0.00365885301542759	0.10162855562201	0.0997585510319362	0.143130813012964	0.011210052831006	0.0119390426690021	0.0117862336460999	0.00703480795964771	0.0551483708681528
ATP8B1	11573.1305436912	-0.369400186576099	0.000705834978064515	0.00929846136649865	18.0892543153896	18.4913559954477	9.50647449288967	7.46688064310878	12.7421634510341	15.8717574653051	10.9882326066101	10.5809087171891
AURKA	1019.62756522361	-0.475414982507197	0.00130906222374669	0.0151131178682682	3.91569161532777	3.80642791545983	2.69383682701518	1.88453588032718	2.2381762215085	3.2044078799356	2.27135444945103	2.16503685401277
AURKB	437.171937980417	-0.58068100855972	0.0006126522841944	0.00833486412798467	3.19245893080859	2.71407163466393	2.10713743077909	1.21746044472091	1.5381322542153	2.17459502413164	1.6505632368785	1.42027930767751
B3GALT5	20.6807714813448	-0.585519175348494	0.00220174383246757	0.0225884436384771	0.119458180686996	0.0767774491290497	0.317514704819542	0.189232551280966	0.0102913197865159	0.022224125298765	0.154124758357696	0.176063970846115
B4GALT1	2603.48009635519	-0.790457608860107	4.837341285336e-14	8.19780047207498e-12	6.64175362100501	6.50830835931787	6.31898588405609	6.17813002141682	3.58174692037484	3.9719803871366	4.72610427764892	4.63987055496571
BAALC	631.657175022522	-0.857713866489356	6.97404809542474e-10	5.90942951888243e-08	2.35004887482557	2.49357432006161	0.533005872752426	0.559873084353755	1.27357610937935	1.28006192164838	0.802694058098378	0.671304142403489
BAK1	597.498690533629	-0.411999842928027	0.00315707756492707	0.0300327122202037	2.73907978788734	2.48751633043033	2.55417148899613	2.45532360981173	1.95440985217984	1.93723115263872	2.19647683818057	2.20895252943846
BCAR3	2524.85524524971	-0.700910403069745	2.99506885156458e-09	2.193089033109e-07	6.45929439354158	5.85802878175929	5.52792242578626	4.23967249138869	3.34546430174874	4.13054669712826	5.12151185582199	4.76227273916353
BDKRB1	2962.63410119492	-0.58202946962243	2.21285554519211e-08	1.32645712091057e-06	24.1130454325797	21.5025535829844	15.9075366844919	13.0304585662917	14.6642645162951	15.8722789661617	16.4040258288566	16.1452048395558
BDNF	6296.46566053594	-0.41080264593783	0.000155493148317743	0.00273999287157595	7.39738356851114	8.08468852458333	7.68829885977867	7.85324464454763	5.38221744280416	6.37485948977778	7.41770393745397	7.43379204363777
BICD2	2738.40095028469	-0.32833239472049	0.00141584842101117	0.0160622737811739	4.21144495174501	3.69807015026361	2.42773332575275	2.29503816960224	3.18937680376603	3.19468287826106	2.10781091359519	2.21556173238389
BIRC3	1243.727748891	-0.83775702319232	5.28297289044834e-12	6.71475637659114e-10	1.91158632818596	1.97096188429056	1.24204998410869	0.867590935858804	0.997427461686645	1.12584027513715	1.23346822358309	0.990133100465982
BIRC5	1234.06094643999	-0.853470270322366	8.9593267027107e-08	4.53817998701512e-06	5.25142463777733	4.84704404687416	3.17582015697001	1.73980019937213	1.94272102310002	3.20703417510378	2.58318148278264	2.07848082205305
BLM	253.311034942118	-0.596417974822888	0.000951922235683608	0.0117933542682571	0.56799234150161	0.521585354116935	0.438557816389036	0.223040835875864	0.294662789383245	0.36756654132093	0.344415810104715	0.286301209143712
BRCA2	924.312630252413	-0.418077528848379	0.00180705829179591	0.0194105201755126	0.779071657568342	0.776305533039598	0.759481692839273	0.539896071573755	0.523195567374432	0.636400718714716	0.64392032808228	0.614352657730239
BRIP1	1164.78097875285	-0.702432926158985	1.50119371219032e-07	7.18009968196396e-06	1.4516231603908	1.5266922158556	0.957628467580363	0.738331473748259	0.786345176230233	0.997240070181215	0.957374820195407	0.884156834932472
BTN2A2	578.011133867754	-0.527676880099243	0.000192360880222585	0.00326304347839618	1.53865128142246	1.43049799598921	1.28493371922448	1.31433388891228	1.05334497548815	0.96256267613623	1.26953068656004	1.09557258681859
BTRC	1198.3288905571	-0.392035730518466	0.00116135104200681	0.0137548453439409	1.76121789272148	1.91981274876568	1.7230115353578	1.85069533783528	1.45592790289349	1.36604818972205	1.2683197244834	1.29693508128609
BUB1	1071.22776436053	-0.491180560829143	0.000758156762380029	0.00980887641582532	2.96927355129654	2.83371531704781	1.82810642363093	1.17122853959595	1.67453939058499	2.37095843667955	1.62148840891682	1.42330118874243
BUB1B	779.851416414053	-0.622994352482196	2.72619515634523e-05	0.000651959597755245	2.1812042947065	2.09945727518885	1.31948366685514	1.00297319289706	1.1350449779751	1.5460691201295	1.02329948385768	1.02220497151659
BVES	1273.22422076315	-0.699622469037774	3.92025304620436e-09	2.80277674818996e-07	2.18803851973982	2.37885531981193	1.88553993906018	1.8441670116078	1.38099259338989	1.39895078051375	1.74874604085551	1.64215781372042
C11orf68	1269.47906106535	-0.395930169155486	0.00188249172212073	0.0200784490050904	8.69719365255369	6.82490556985249	6.88688016702113	6.10588121496792	5.95879305482415	5.80899428252066	7.09531272643801	6.92788135193509
C12orf75	7134.78854735815	-0.485327586936241	3.99597975565681e-07	1.70350354366152e-05	49.4740199524894	51.9010353039061	31.0067863739359	25.2440377847628	35.1484017751683	38.1105190179122	34.0501185031335	33.4862845775115
C18orf54	525.812163307628	-0.722827764666058	2.87896848644125e-06	9.68617657190664e-05	0.953464525797925	1.00456253305273	0.763474761676493	0.632669941085936	0.497375526387123	0.627177519892764	0.60988930556187	0.447541671194214
C1QTNF1	2325.98081704779	-0.35611764059884	0.00479274515209983	0.0411960004401217	6.66027008672746	5.34295033432654	2.56661746680094	1.87071219360256	5.23838773632618	4.15741430966466	3.79045188020162	3.75772095404745
C1orf216	900.844698556606	-0.473966576606491	0.000141706294092631	0.00253611773012978	2.98934189821797	2.9878853859847	3.51137952674894	3.40015344763765	2.18330664955592	2.10850658355996	2.83550234937948	2.89387974739632
C2CD2	2845.22348388668	-0.863299595997018	1.06717550624727e-15	2.48290138546715e-13	4.83163580497589	4.68758200209971	6.21295178801858	5.36485805505153	2.39896099555742	2.76985604690188	4.49205018498482	4.536051587151
C2orf69	1040.15030271162	-0.452257524643139	0.000184074106467086	0.00315453840134043	2.65243392779763	2.7354743609366	2.43423560177186	2.03783605246051	1.99223166940258	1.95136779266249	2.26012075896708	1.94912804334437
C3orf58	1058.02425813514	-0.501049399781927	6.64518005370929e-05	0.00136350353658098	2.13334879065929	2.38402445100648	0.827537739354934	0.614832224833165	1.56650221512027	1.61504504024513	0.947838135804134	0.756444015827047
C4orf3	8653.0858550611	-0.423251505637456	9.53083504736507e-06	0.000264302571101374	26.5469347637705	27.6653178244447	25.2211558930213	20.0031961465429	19.5168473066177	21.4709895872013	25.326974793459	23.1383697614841
C6orf106	3745.92796757945	-0.355793296239978	0.000173898008076782	0.00299886677998742	7.85134254911066	7.92328020065928	9.90397627047007	8.99471960886416	6.33208652731676	6.19930874974226	8.82068664050332	8.4661278664878
CA13	257.312821494568	-0.980980772865818	3.33948322769955e-08	1.93422304922497e-06	0.737678797794005	0.809348974972672	0.785466782512893	0.684641981460975	0.335147974440656	0.341754914905589	0.636581688364075	0.530454368817407
CAMK1G	149.553310605401	-0.597028864178275	0.00287338632419852	0.0279897505234911	0.638273711127708	0.648945735755301	0.379182463433249	0.360264774787554	0.410316378172571	0.324670177036695	0.319898635638717	0.399211688713592
CAP1	22275.1550186243	-0.358492624572215	0.000105153991853027	0.00199923662903948	73.0742066084493	76.7884980253661	75.4133394006475	65.615192211576	56.8310486334609	62.0562415403787	69.2578238919195	65.4334525407723
CAPN2	42177.1206024311	-0.322253804211316	0.000851040422317264	0.0108269062809537	103.336139451429	105.517466994149	90.5446801739311	78.1983748941798	78.7495538512445	91.0882638714256	90.1538858536769	88.3912820547351
CBL	3926.85991976175	-0.378523836073057	6.05354816639917e-05	0.00126672340975856	3.31743719759427	3.25262193780726	3.29602614066025	3.1822136972398	2.63830412764991	2.49403042554557	3.08003197324353	3.10531829196152
CBX5	9241.50080379249	-0.644515429544741	3.78246290954984e-09	2.71842242719323e-07	7.77529914654946	8.10528706420949	6.59986879774167	6.67621553865187	4.53055886114913	5.59795449561842	5.15852722800375	5.13008101099096
CCDC136	378.373486222255	-0.479499425286142	0.002443999009425	0.0245598641305835	0.843894150948754	0.866300313685164	0.593974252004023	0.809574959092754	0.611756217988106	0.577668623168004	0.682616616501594	0.620371772222998
CCDC50	10851.0089808504	-0.548357467206967	2.12972409959286e-08	1.28787324736173e-06	11.4677076172875	12.5144303007781	12.5304590125873	11.7453018503557	7.89902752236044	8.63899712298075	11.4910510439757	11.1620450537566
CCDC81	477.719292867187	-0.466241964271315	0.00291632158478771	0.0282914108794212	1.60739957347434	1.75758477467006	2.76289062240902	2.51301087250417	1.07103644914155	1.30449576277222	3.11443925203821	2.99835802778306
CCDC88A	5447.26724190428	-0.345047045273224	0.000684546405279128	0.00911167414577611	5.06222700931151	5.25834236546887	3.60441387954911	3.47720627132425	3.85800384926323	4.38828278637676	3.5193819820619	3.3621629036611
CCNA2	1415.21157196037	-0.547463119718219	4.67193276567902e-05	0.00102610593719161	5.0656319325137	4.79645739589984	3.17272029173682	2.19347017693645	2.84517467919996	3.79742084745591	2.73046768119753	2.50072654501924
CCNB1	1787.75693368371	-0.53693000278885	0.000221552736127503	0.0036553538567575	8.13625332075427	8.34047364117719	4.93465031601036	3.09794750271171	4.42697718753879	6.65680167134201	4.29840725575004	3.70438249357098
CCND1	48327.77615342	-0.42056024561609	0.000102817623492942	0.0019602465523439	110.670802286064	104.390086495085	128.832925607032	118.44127815093	71.5260948011548	90.3467158647364	127.068806183017	126.985006502535
CCNG1	9670.68997646627	-0.416711243699706	3.35474784785948e-06	0.000111233390597988	36.4070412128444	38.0141354075036	34.1798673969628	29.1425490535911	28.9178319557377	27.7469812375261	28.5740901458533	26.8037171084954
CD163L1	663.842727295133	-0.722580515612705	1.83940000306278e-07	8.5591335057772e-06	1.45674758375736	1.55106318547994	1.45284628256661	1.70692606769795	0.8496155945848	0.914803599857173	1.28098944939632	1.27824518523858
CD274	866.634821062409	-0.549277981227258	0.000126440244699502	0.00231419365198676	2.322008305967	2.24443490216883	1.678490003154	1.29966457894264	1.3121331248846	1.73716005346093	1.69812088008325	1.48783140969563
CD68	1982.93012889988	-0.466407972613425	3.86962784357064e-05	0.000885582454116387	10.6608434493692	10.0401347817922	7.25089666328353	5.3424116002594	6.9695190808116	8.06544161058112	8.33033455480266	7.62687706596846
CD69	59.320397366472	-1.1311298609171	2.54798856710531e-07	1.13929117461416e-05	0.440559457871071	0.547066156577161	5.28979173461503	3.17841116067665	0.106169147934849	0.0797469508035638	1.79060207373849	1.79265110077385
CDC20	920.29819693572	-0.438459501879352	0.00443796019270231	0.0388519640084341	5.5195332848083	5.15802277685864	4.13911497213961	2.41016135866629	3.09644848576699	4.6080371545397	3.34947630594839	3.20216346976371
CDC25A	211.157852447017	-0.586741619037134	0.00157038694448496	0.0174973227166762	0.643486306656363	0.544646947779678	0.583955178833249	0.360984270062671	0.371585789965833	0.345190987573579	0.524820211733243	0.478567621996706
CDC27	5651.40722408533	-0.35047609156675	0.000645009948702687	0.00871461768291514	8.68131733925778	9.25119520645636	5.91487471708629	5.83226340876106	6.68361884216177	7.58576933517891	5.78845710846271	5.42747891119378
CDC42	13826.9220366728	-0.345619159115683	0.00053434693442505	0.00747704420882025	39.2892686993693	42.1994641783542	34.6053399010794	28.8204595658486	30.433501473886	34.6863812966868	31.8761753403503	29.4224861426655
CDC42EP3	10210.58861071	-0.360719828923213	9.08435027915756e-05	0.0017814410897428	15.5676939230623	16.7445743780406	12.1394389264278	13.3487438868828	12.7131493053719	12.8942355293513	12.7618429726565	12.4389590934759
CDC45	234.623247622282	-0.647768342435647	0.00122520846926158	0.014362456582027	1.20815107038611	1.23461482100542	0.798325603865618	0.446779819053409	0.466503838007318	0.865802054813359	0.685359293550628	0.67359225778178
CDC6	485.382655166278	-0.584131708351558	0.000664968195232063	0.00894027268947162	1.49687486981125	1.76304102061054	1.66194010046305	0.897208126189427	0.826105105057764	1.21954510606058	1.38861993737376	1.32009267705359
CDCA2	840.65926907158	-0.619964577010596	4.02708870091034e-05	0.000913716472684234	2.10266958416381	2.32461294387016	1.32567589586111	0.919045938077935	1.16365215467526	1.61237854432709	1.12325804300248	1.07522337041707
CDCA5	345.106365721028	-0.596396061506008	0.00063122167732325	0.00853672902917857	1.53002335644938	1.2444844466736	1.19663530462885	0.755503599375371	0.732805091025333	0.970991655425202	1.03818035479025	0.896589197188758
CDCP1	1234.17885127188	-0.794602075559726	4.39783113442717e-11	4.53902466032194e-09	2.05388838639025	2.147185350217	2.83512908247232	2.54423659561349	1.26040627766924	1.11357057670212	1.49478724611222	1.44351982722384
CDH13	4519.47472866699	-0.461838545021741	3.40251580057341e-06	0.000112545384083063	9.70621929057685	10.4114911187405	12.5446254278004	11.4695069283923	7.157735879843	7.61587720394664	12.5585697062497	12.1629470914938
CDK1	990.151694118647	-0.521007611157185	0.000709823821913533	0.0093093634693499	2.93508213902265	3.01385172590266	1.88821225719262	1.10103800997485	1.60652449020937	2.41404657129386	1.70590912728528	1.24058903001776
CDK14	1878.41535232174	-0.345626624315985	0.0058800526154469	0.047932070256248	3.1307692676476	3.26266304986454	2.07224620695482	1.80112950937265	2.22997373671479	2.83185482865737	2.32706573600452	2.29602223727464
CDK15	2019.71473565133	-0.750760939832656	1.84095047815895e-12	2.50205219937503e-10	4.31292923078582	4.53709445285497	3.389232448459	3.06337106690526	2.62514343922723	2.60749192386092	3.23480712134045	3.11336678803796
CDK2	1584.12051273496	-0.405121811581507	0.000377177134168756	0.00564614015347276	6.54364069646804	6.53607897349971	4.73421712065582	3.48710104947813	4.71048935635298	5.24018713905675	4.61930988369879	4.19328942507258
CDK6	16365.2354250999	-0.397092119487523	2.01628965272955e-05	0.000505065840566033	12.8785221370017	13.3994993107718	8.17845774794843	7.47388956762536	9.65056307240775	10.6133821490126	8.50837354871944	8.18307674789744
CDKL5	1086.92858385497	-0.42658753378592	0.000453252622086123	0.00657695427418204	0.956905364287901	1.01351528491337	1.14663426927471	1.19085718855708	0.720696360420443	0.750154774237713	1.0407759620391	1.01995510108893
CDS2	4103.43355735104	-0.729655850689753	2.03121995301621e-14	3.81952825959637e-12	4.49511109671525	4.66472938624363	2.41687166474952	2.57252856707935	2.77660922742376	2.76380415475353	2.13430172798699	2.10466484553135
CEND1	70.6682591630049	-1.0613381570586	1.31227818393623e-06	4.92176028166466e-05	0.697131702654019	0.460857937789811	0.0220972450938462	0.0239047906663616	0.150405825506943	0.121800628384058	0.0230789568542513	0.0361848362925911
CENPA	256.953286888499	-0.555490785258219	0.00271784715202484	0.0268016435746012	1.87830828801491	1.81870832900599	0.986296385723057	0.656600015364034	0.952850901549581	1.35620041877411	0.914475805867151	0.754865034416423
CENPE	1612.14736911935	-0.486622793872206	0.000508924123277647	0.00720949581035321	1.81377453228928	1.85752461455048	1.09665049262987	0.925756481325506	1.06775369509824	1.51486278924168	0.97538449351596	0.909516022396651
CENPF	4613.39707116082	-0.468276594701636	0.000357972641433494	0.00542677543343574	4.33294283712023	4.38726917168567	2.25559088709447	1.80556322958144	2.57582758338498	3.68113748404851	2.10306321870587	2.02339244164272
CENPI	720.18542085458	-0.484843221891495	0.00113042100978467	0.0134116587738239	1.78288471182572	1.81146564374618	1.29010054392635	0.919537303160618	1.07800464659463	1.43687350437339	1.27462149904399	1.13208127812594
CENPK	419.642800670003	-0.53743695029667	0.00228070640067754	0.023224967924407	2.57089662685835	2.35118692977898	1.70198573043451	1.13479928225141	1.24248810084617	1.93584291618871	1.41769058847112	1.21574918101023
CENPO	758.553498819286	-0.423382530734992	0.00408801122654629	0.0367252160384823	1.63788942445935	1.65687837357122	1.4269987336771	1.32397422161916	1.03967391005862	1.38413169558021	1.30366808700682	1.19672586524262
CENPU	576.188045346356	-0.551634462963471	0.0010440093615244	0.0126711905443373	2.32821781970424	2.2556689800681	1.92201404546959	0.978044138761655	1.15592406528023	1.80828556445634	1.62379920197986	1.3832509022459
CEP128	343.4441840341	-0.576950079998663	0.00108664974087674	0.0130731297046582	0.796992413681247	0.787350415273053	0.53860361633724	0.516789220369488	0.404443441403772	0.584763259179285	0.502869601961804	0.438019369246715
CGGBP1	4941.30861958848	-0.338996945559512	0.000483819150657929	0.00692532375503794	9.27603852396733	9.80242314417856	7.77373400802987	6.90398312010497	7.44662247696706	7.89145261969542	7.17690990894084	6.08882096346133
CHEK1	937.562653912446	-0.404725501718417	0.00140323038962158	0.0159874015888561	1.81068554904551	1.82573199867734	1.46673502119048	1.17678157447769	1.30622366791173	1.44466578314304	1.26265489993449	1.315473970688
CHIC1	1082.1228450622	-0.433822625329743	0.000426659060619099	0.00627060912753573	1.49036334447315	1.51458822513142	0.942697039811511	0.932609615005196	1.0559941684703	1.17195995027276	1.04692101567204	0.78655802522189
CHRNA1	125.983777415326	-1.00693082030228	9.78259073374167e-07	3.7509950559238e-05	0.786210297648873	0.712244208947938	0.769545158543037	0.51819232541771	0.278453781159527	0.264674322685035	0.391704676663653	0.408784616746424
CIT	1139.14606464181	-0.476727229665014	0.00227634890090699	0.0231978035358205	1.3750220078311	1.20214697810152	0.742436222921418	0.527624282649992	0.702752781668014	1.09413821254412	0.574967101635332	0.625453962670966
CKAP2L	639.553669375847	-0.623297297875499	0.000205735612197337	0.00345248502277853	1.37930393757498	1.39115525117897	0.947466101838118	0.726183898467947	0.649420100042675	1.03861107976417	0.84082774610615	0.690938035516636
CLSPN	493.092877504277	-0.699092843697608	3.49416669600857e-05	0.000812956376883213	0.536293279546882	0.595641132285154	0.544774636237615	0.410784730375948	0.261871351821962	0.385095141288652	0.442857403424908	0.363560580525856
CNIH3	389.553305957952	-0.649150038750171	3.70085740580198e-05	0.000853809573267963	1.22256488093508	1.10537370023476	3.00056493817371	2.52645962555439	0.703721775866782	0.704028768467322	1.44539566468469	1.5970082031604
CNST	2191.16272760451	-0.361217871174806	0.000964102208156833	0.0119227306408728	3.71577538443092	3.65735493839631	3.36820753234339	3.22254768190825	2.72112325918362	3.08333718696147	3.7523696001008	3.47541782192831
COL4A6	833.148303757966	-0.504572325140443	0.00138753840827721	0.015859067219335	1.12798164161304	1.27503186207833	1.22850068604638	2.17505282791587	0.987972673279895	0.651141945881618	0.855569852680533	0.901773099611589
COMMD7	1754.15565473107	-0.345471526814137	0.001768395429439	0.0191290496925998	8.27068182644429	8.81920179788949	10.1541061768473	9.22268820587963	6.70820508594643	6.91409699980316	8.76645299586869	9.42630238638066
COPRS	1384.17509081337	-0.410983682989131	0.00180577746301893	0.0194105201755126	10.7658192414895	10.3310154167005	6.95390963757329	5.74206797044665	6.88511452061954	8.93779985918839	6.67667228170201	6.61780450417834
CORO2B	617.156115046404	-0.567207875592693	8.26392101569775e-05	0.00164404121423888	1.46817004714268	1.37963378640982	1.06536026872592	0.742480020916793	0.856857169419786	1.01585466883376	0.897107043421619	0.911651787532119
CPA4	5343.21930035344	-0.547278465876876	1.9528910815199e-06	6.95426958807568e-05	19.2477341126926	18.4307126466749	34.9033673619812	25.1248442875634	11.295783833315	14.4304167982697	36.504584945878	34.0122732025183
CPEB2	3428.73357942992	-0.677530041456881	1.0148307609493e-08	6.57102917714673e-07	5.15203130133477	5.12416094086635	5.12282611612266	4.11663024747626	2.78815044723278	3.56395374333375	4.58481121398571	4.28663073807747
CPOX	1540.27557074369	-0.332893363739014	0.00291350264314359	0.0282860677284457	5.20082828891375	5.34715032231389	4.8469234471148	3.86020590011221	4.14098357024524	4.33819543405783	4.55462915340912	3.74251624230388
CREB3L2	3464.59524136825	-0.404220203865385	2.37894908541971e-05	0.000581064663622	4.28924173974413	4.21099114695934	3.96295817100585	5.17650069434365	3.22045199760859	3.29397829437899	3.87308955569321	4.05845153830908
CSF2	60.5660066296507	-0.872454306474401	7.04895953993622e-05	0.00142926244615516	1.14398327810763	0.848693311833896	1.1467625723002	0.493527931005819	0.236529925590217	0.340524559354835	0.716206181063752	0.573262046221818
CSRNP1	822.201131781382	-0.787098565887354	3.00357498524435e-09	2.193089033109e-07	2.38431388672922	2.49811870861608	4.03993696955606	3.72893888530808	1.2940741286488	1.44834112040126	2.64934112489761	3.00826011915414
CSRP1	14605.2431066097	-0.617040066055084	5.82173925647186e-11	5.91963072396957e-09	62.7708590928373	63.9929957556812	23.4329066079127	20.927827673919	39.2850397435056	43.9508348371319	27.4121402413846	25.9671941796912
CSTB	1971.59556068107	-0.489999370339955	6.14385174944068e-06	0.000184948800360904	21.219334748885	19.6835793202007	29.3781815675846	30.0063300315736	14.0326935132131	15.2241776922958	20.9176272760997	21.6486689897323
CTNNAL1	4040.28182122494	-0.354053683019608	0.000868597107630251	0.010999291970886	14.3747383944841	14.6979555401419	15.4553234826997	12.6132541240776	10.6235203359933	12.4138483159287	13.9386827935083	13.7790139271655
CTSS	740.859161405638	-0.434458243485489	0.00164625834063427	0.0181511552143667	1.64479125945922	1.83256760134217	1.19336153297966	0.8335071421973	1.36005667079344	1.19480898860902	1.08034917855101	0.955529113946373
CYCS	3890.16677074888	-0.364860915292846	0.00614001088837133	0.0496957131277555	6.24305428360562	6.97266546930187	6.63340304779986	5.5374989033249	4.2719783185648	5.99565577882263	5.77707880525869	5.84226186726758
CYLD	3060.49236218972	-0.466917298102388	6.30637298246684e-06	0.000189012187620791	3.31922608611035	3.39890073854915	3.15079987535664	3.17727654123645	2.33105435209074	2.57401705024774	2.82418177945271	2.64411541688806
CYP2S1	200.819745272344	-0.583387580907985	0.00560278642739808	0.0461918614347708	0.798550319258313	0.854700875877154	1.4589023955509	1.91591935713463	0.633897646587413	0.269232791443303	1.12921536303491	1.05168615786676
DAP	6875.21268875486	-0.495836762956503	5.01492497298061e-08	2.72094368000414e-06	29.0097019660232	28.1398080664236	27.8381414489172	32.3917874988089	19.9391596432377	21.095194229735	23.2988514207878	22.7271569714374
DCBLD2	15075.0408728151	-0.520523872184506	1.88177659615008e-07	8.726738964646e-06	24.3384492061928	24.2491496832714	21.3185193906354	19.0564274757631	15.6736175403894	18.4544215502789	20.9847178409887	19.0887763270859
DCTN5	4044.10911200937	-0.49368581742213	4.3329032608132e-07	1.82351317156929e-05	4.93566589680405	5.09002275951039	3.7972491889595	3.7648902470858	3.48595717778633	3.70955642790921	3.3004824689744	3.05184285654989
DCUN1D3	1873.12533259024	-0.347462348329781	0.00112833486242378	0.0133984884571724	2.80186205765766	2.88425984965456	3.45878425279967	3.18554770523337	2.25311683078233	2.27624518540381	3.45086221744153	3.39626244844485
DDAH1	6585.0346070428	-0.531314327378368	3.28139806035422e-08	1.91406229532632e-06	13.6546634732916	14.3323053544115	8.88287537337376	9.14682202744877	9.38906944505735	10.1654355980498	9.8719475291706	9.03051595192197
DDHD2	2687.21891158895	-0.373281260598881	0.000214960677047575	0.003568035325069	4.34384445021878	4.37585152356574	3.24166661934902	3.17271241094142	3.33188461738205	3.49423925818166	2.83202103006233	2.88213166425056
DEPDC1	1112.33020987079	-0.411281743842906	0.005447475284037	0.0453196928630157	1.93579819244573	1.98931568765263	1.23235620714578	0.756400273130018	1.19077789750693	1.72222492047213	1.05762736217168	0.884726714699825
DESI1	1471.18063033107	-0.324368970124872	0.00373796073393346	0.0342987880980646	3.58726836291503	3.58848742821065	2.68188858790083	2.49141503627638	2.83848379339025	2.96420358999357	2.49715286445312	2.40885293101483
DGKD	1759.5125577116	-0.640233438930763	2.45433681416164e-09	1.86136361591143e-07	2.90435801176173	2.70161838616922	4.29562223357633	3.89067866123619	1.81288306622175	1.77594975949284	2.80530150269547	2.91837212854261
DHFR	539.947826126899	-0.579565940993428	0.00087227163931088	0.0110254813930207	1.30170973325307	1.52571595838749	0.919283757217927	0.59962478150431	0.685362618938252	1.08702955501405	0.874780255548942	0.844754212940814
DIO2	997.717715975009	-0.954619845220979	9.89733192718528e-13	1.41521536837992e-10	1.43350991022129	1.71886071186601	2.09274516561181	2.08978233285277	0.79938354481879	0.755369955076797	1.26357697109596	1.31419387393662
DKK2	117.600595492326	-1.06632339254502	5.31125157758445e-07	2.18286079058388e-05	0.411523633633256	0.408073393648508	0.795045147441693	0.972010519875188	0.0957224317371738	0.160120375159141	0.687271917575481	0.640491390011211
DLC1	12159.5034623219	-0.444626900256498	1.37449393012988e-06	5.12708646165568e-05	12.6713932472036	13.5504395026105	8.52495871568039	9.33566234492473	9.56699517667196	9.98206694217513	7.53174223285308	7.49829132587338
DLD	2381.78805580114	-0.352468949705767	0.00133069012800943	0.0153113020848159	6.0233004603712	6.27860666796322	6.21888829669718	5.96211608622554	4.57380660153903	5.17902699600006	5.51997801428211	5.07187951067529
DLGAP5	1186.63021365173	-0.445879600615991	0.00532925266907775	0.0446337104261319	3.58809555593663	3.9119959704678	2.14352233816394	1.32099785987166	2.04199439516987	3.31229854120453	1.86490842914708	1.6351384669857
DNAJB6	3342.11810976026	-0.345019912089097	0.00102142901625645	0.0124632498721354	9.36813126289411	10.1177418734925	12.1145202236678	13.7710754962664	7.42606956953288	8.13726743568463	11.0653339194248	10.5117289726243
DNAJC9	1013.37562007613	-0.389169994169723	0.00210134566157362	0.0219021806350958	3.88340498661395	4.21560467165185	4.19530049693401	3.46877552881763	2.97507436923034	3.23198526854344	3.27443733260631	3.13710192409973
DOCK10	3836.50089925013	-0.418994380464693	6.96680027593344e-05	0.00141889120753321	4.72817344337695	4.82606241645304	4.28025515011502	4.03641031700906	3.35046056716833	3.86865786736691	3.83454967513409	3.79161269827629
DOCK5	5020.98641879183	-0.493606306395334	5.29668478028357e-06	0.000163305193911579	4.60620318956902	4.59453463527562	3.53318387012858	3.51055644319763	2.9697636956477	3.59654478774776	3.46019784916298	3.6386425817094
DOCK9	3056.59542341697	-0.417590561746817	4.13721809913303e-05	0.000932538470390789	3.65792535006524	3.57397533190857	3.61483277286201	3.47882194994074	2.60831658371191	2.86749529580278	3.59155489459176	3.53135982862455
DONSON	479.384363807054	-0.468798939303147	0.00463904765840975	0.0401767868813821	1.6735631659707	2.06362596510706	1.87845421155327	1.36454168064653	1.13808143139154	1.47253146691103	1.69906511672506	1.70299568723701
DOPEY2	1602.40797405737	-0.706366318182639	5.84804919747742e-08	3.08754505129894e-06	2.28550250743645	1.98872659264091	1.78937944617901	1.55639738731621	1.11987337102381	1.43427986486872	1.55614509754493	1.6230121236494
DPAGT1	764.88219757153	-0.408148428168874	0.002808460915934	0.0274773934410536	3.2328594775405	3.58453294670061	3.98615422894237	3.7954036013549	2.43436076740056	2.68755840325144	2.99008896301665	2.60757563096476
DPF3	1424.40127630194	-0.583084781089602	9.21158517208017e-05	0.00179612826217535	2.92484987568535	2.86794769603792	1.8747172571519	1.49000940644382	1.48343621810945	2.25711923841761	2.41125759822251	2.28991151647285
DPY19L1	2837.7902536376	-0.34204159019823	0.00105981742251995	0.0128172028192319	5.21772379973065	5.62005742244142	6.67257315341013	5.8543435206037	4.21730669486319	4.46042926060512	6.38104077060025	5.40306669899206
DPYSL3	9937.54341973047	-0.519921164535677	9.89117858369013e-08	4.97348748785034e-06	17.0277849727779	17.6092192334752	15.9874902960556	14.3044376576796	11.4363854296679	12.9422644612266	13.0005350663906	12.7806276008035
DRP2	1066.89781644752	-0.583851598899769	1.2727240277914e-05	0.000336622017909298	1.46769400949123	1.55500946025411	0.993870009140151	1.1102487980155	0.88581725405358	1.09846439147039	0.861373591642394	0.890679504777023
DTL	596.012805732823	-0.816257283203441	4.32077868025645e-07	1.82351317156929e-05	1.43474189268576	1.4019067365166	1.00681864808874	0.435867923213839	0.604177370932194	0.884698234048995	0.823058758541859	0.631980895656796
DUSP10	2269.07529228922	-0.49299486686159	1.80863511156387e-05	0.000457221623875457	7.83887592118931	8.33810228077817	5.3369164661363	5.2586120363827	5.30365589559407	6.22044524030687	6.01314213164394	6.05947256828893
E2F1	294.704472807752	-0.547256784625812	0.00209903126556963	0.0218946825094789	1.13823982296652	1.08716461736845	0.63987892876384	0.343027616628784	0.604593120758266	0.816785991674723	0.557156790404099	0.553934747386779
EBP	608.068757080112	-0.532197926261454	0.000439834514153972	0.00643668270340253	5.37281035316362	5.1367744256693	3.28511740437097	3.41649855598042	3.06250375062845	3.9936690048548	3.84147940268403	3.39755909721861
ECT2	2810.91530126142	-0.394791942840579	0.00117974770104184	0.0139366580827895	5.76732814195306	6.07444068455036	4.83344336085191	3.97104911485557	3.97140315341686	5.07468075866477	4.5129700022732	4.10892128548317
EDEM3	4099.34764046665	-0.630484145747718	6.8556561204623e-11	6.72197082611329e-09	6.18137288194778	6.21521383370654	8.02748152412006	7.47213024394357	3.89538935927878	4.15706213942312	5.83287337265049	5.29305814799038
EFHC1	1119.76346771326	-0.345940297545214	0.00363007983730708	0.0335104949070036	1.47208211635467	1.50056213426073	1.61705369827104	1.38697491044829	1.21402178310047	1.14496997020435	1.43866776864908	1.34446220400721
EHD4	2754.23234695439	-0.327484420303252	0.0010921450813844	0.0131277368933131	9.15375550860951	8.46822772523163	7.7509085151007	6.40914330575202	7.00643936457829	7.24676147954948	7.99677478606895	7.98345583117262
EIF3K	2275.86758424178	-0.491377602679143	5.17988548448685e-06	0.000160738601292197	23.9116275835885	25.7350934802811	16.9539442698052	17.4315693859611	17.2490154559699	18.3025822191709	12.9065486772323	12.3981936567641
EIF4E	1742.21018316483	-0.337106624724054	0.00292606496162509	0.028345867133541	1.28767999452888	1.38731279423422	0.94192704151914	0.824239152351202	1.03166120491609	1.11206271477822	1.00057581068918	0.898349454022886
ELK3	3996.59122902869	-0.437696999773804	0.000100398823928504	0.00191679368020386	8.69365452828507	9.15279871903833	6.89596072817308	6.95876554683393	5.98065999442129	7.27791697036581	7.68071337203213	7.19855690130944
ELL2	14006.9751472412	-0.388129325986448	4.27005933591022e-05	0.000953091130146986	20.9414176415768	22.6876672808385	14.0531169089587	12.3181163065048	16.3264966966823	17.5336113313096	14.3331361486538	13.4107411156455
ELOVL6	1075.43383003644	-0.478194965525773	0.000371066860623672	0.00557900853864309	2.89752512517942	3.28841656079018	1.86310329230596	2.06034293526948	2.00482995044877	2.40359942875977	1.9397155626472	1.91393461633224
ENC1	1257.35954657107	-0.422620508143172	0.00096569833897648	0.0119317201612333	2.126960762564	2.07976276882023	2.92094100825011	2.98602693923954	1.40332107818512	1.73169978600231	2.29731675576093	2.21017109226487
ENTPD7	1040.94125709584	-0.618008884733686	5.75298447081569e-07	2.31587149064185e-05	1.19666935777735	1.27453539983244	0.88644951969634	0.914205687800851	0.776815102154526	0.816866587194103	0.761979479570772	0.713995740193642
EPN2	2418.26922849824	-0.341452246460442	0.00120963502012222	0.0142022109830671	4.82910004264256	4.47619311243246	2.45238745157756	2.40572138944781	3.55382951842175	3.8838991688359	2.7813317260936	2.61700976463061
ERCC6L	310.309581862691	-0.489186576102445	0.00615067625725546	0.0497353446671532	0.725764527993646	0.747902404878346	0.518736374011946	0.367637506321346	0.411926770024006	0.578665690421187	0.420784187061029	0.339777935084982
EREG	162.265526360438	-0.605417089750552	0.00245383884074463	0.0246407064863947	0.401020355412694	0.347772741360519	0.318294868126852	0.277950207942511	0.24573583588558	0.177404718190864	0.236398732472863	0.208772570788686
ERRFI1	14282.5928378945	-1.23727512946326	4.18233310526567e-32	6.37898739288687e-29	52.7508275216374	54.8572676179249	47.592307083458	37.2830450277007	20.1262726580501	24.3141072866327	38.8839398654721	34.2818770240418
ESCO2	243.026640188108	-0.83568157431815	1.25005335162126e-05	0.000331264138179634	0.805258694554388	0.830919092756191	0.625517206153423	0.305555728297195	0.304114935597309	0.471940731403988	0.438931793837221	0.419771399460984
ETS1	6596.62527243692	-0.683180855521787	1.76156808186876e-12	2.41810450598125e-10	11.5725843128359	12.4956868126359	9.14791027588122	8.80767401967091	7.31340982493059	7.73647372021448	8.9223148850708	9.10065622955632
ETV4	415.262132682928	-0.437999109621893	0.00561147707043244	0.0462357417441933	1.48894149384511	1.43584357125433	0.922145809385355	0.937283844997371	0.96391013380391	1.14105767968218	0.853043717816028	0.841307273077362
EXO1	277.735339884944	-0.620061529220693	0.000990073292213362	0.0121890009705945	0.77818619871273	0.908846163293819	0.551569449677852	0.374186512175348	0.393305585879362	0.595643974211912	0.559614705975442	0.514208380018478
EXTL3	3434.22586694072	-0.480219670520065	2.16375245000225e-06	7.57699741866859e-05	5.35888801899026	5.15529430881642	3.73329993296127	3.6945964813836	3.60345165063296	3.99943716354471	3.46804936499024	3.22330919698781
EZH2	455.800269089445	-0.527786489507558	0.00168826050610748	0.0184659378225796	1.55126879009091	1.47090953804369	1.14111964152861	0.992953691473696	0.81544133328204	1.17920568840673	1.06606536431974	0.987439209615542
F2RL2	1350.79782938058	-0.389209573285243	0.000998513272730697	0.0122708967724031	3.74796219444951	3.70499699734872	1.17739844331183	0.987720402983917	2.69164306849502	3.03472315139738	1.53325578207125	1.49378264398776
FAM104A	1748.56525721159	-0.457817609852153	2.22905198092264e-05	0.000549339255693448	5.64416441140421	5.71455477117266	5.86300549561126	5.22999919352026	4.10529409011214	4.22697197580583	4.90901689984144	4.83077446634971
FAM107B	8991.54527587146	-0.425172576902349	3.57953155684328e-06	0.000117270237901641	16.2143741015116	16.7727435691666	24.4313517272424	23.553223502197	12.1009463893871	12.8382321815921	23.0649565687143	21.1802884140854
FAM111B	331.259079677128	-0.937899529546239	4.48306271064697e-07	1.87618908015399e-05	1.10089388362529	1.04999735833887	0.896027159179484	0.40276882687034	0.356200433048902	0.592322763893415	0.776396323721704	0.717145575129938
FAM122A	510.001729203932	-0.480434940583525	0.00109682750892155	0.0131494770436385	1.24146432896686	1.34173164798635	1.48811883577146	1.36569347809024	0.910646319096048	0.90687674889764	1.15120982294741	1.10182857645716
FAM196B	455.107815460584	-0.673914737982458	8.10774430399706e-06	0.000231301815681612	0.820092985897063	0.771811099919679	1.133963372164	0.82178281500013	0.461030109679738	0.492204481089555	0.661323761322088	0.703432517601815
FAM219B	2671.09605003811	-0.341282369998178	0.000578866778354816	0.00794610426647656	7.39334091526191	7.20140738882511	8.42193517252892	7.10267760774771	5.98719996398681	5.70958288188634	7.47249257130942	7.09064381453274
FAM222B	449.62975388766	-0.535011518789727	0.000558618286878656	0.0077534410758173	1.02318087235887	0.845502049731253	0.624122685596669	0.773417165756322	0.641376133854632	0.600008718837221	0.592162995420749	0.663559062337501
FAM46A	2221.0050131729	-0.349482900745268	0.00070551871471271	0.00929846136649865	3.79067334661142	3.58963617364746	3.22273869071956	2.90482591373941	3.03008307726842	2.83921799783072	2.88226561613991	2.83839191759751
FAM46C	3341.69105437258	-0.576070038690916	7.83500615219699e-08	4.02813218918383e-06	5.64319528976763	6.03236697820647	6.66715220237024	7.52604143044714	4.2253190393496	3.6268012985157	7.08621617166052	6.85498106420571
FAM83D	537.758096628121	-0.459881513686701	0.00457915275443075	0.0397332679267199	2.20503169167756	2.13632597720092	1.65021407944359	0.944135560655841	1.26076290584662	1.79543625875588	1.42884766113734	1.1165842990589
FANCA	544.607793866563	-0.659764893006675	3.14595407690756e-05	0.000739460815303255	0.956669246160951	0.881992451517174	0.665988101749609	0.461469935537986	0.466566591635971	0.635942100626752	0.624022156666309	0.634496050279346
FANCB	333.633365010929	-0.517943106651535	0.00189544020874912	0.0201389285660055	1.06565193737706	1.15079373886125	0.883666266116914	0.724805206924151	0.695386867336026	0.785279805913283	0.826537436691743	0.792380572473758
FANCD2	719.953633573591	-0.424184317203427	0.00372901509844766	0.0342625102117744	1.12129627122805	1.13388642768544	0.831074189646798	0.497643213738773	0.723448902011739	0.936209155922032	0.641266963334158	0.6328295736635
FANCI	1000.56766626823	-0.513875566521437	0.000352853661728493	0.00539378865762474	2.05696710178725	2.11680991032893	1.41115035890898	1.06562776374592	1.21203532095977	1.65446555811741	1.35185633690767	1.2569508660284
FANCM	493.245411744339	-0.420422622265759	0.00558194643821105	0.046047703580122	0.64046106193594	0.68813098264045	0.614169612642269	0.559123135678215	0.455470053481349	0.5219994487563	0.45472935691058	0.45438987715726
FASTKD5	423.989510988618	-0.618456642333803	8.12486264002079e-05	0.00162107542819136	1.42892466355781	1.61739027244947	2.20417511391747	2.00864725892633	0.934973412061342	0.963688241081218	1.41177759737869	1.40769924661006
FBXO34	1547.17018312413	-0.472917702416365	1.75275702167296e-05	0.000444733745591585	4.14781471814706	4.20113640382049	3.61291801795663	3.00818679809	3.07393475222734	2.97508936108565	3.98059734531385	3.66796510081337
FBXO5	553.004264432556	-0.450611371165982	0.00380270061940223	0.0347765965373314	2.12919601245626	2.24246750074786	1.88131372885194	1.52747770583298	1.3527104863855	1.77381621015422	1.5842444602676	1.6135093334731
FEN1	761.21839561879	-0.745787555203759	6.65448477372224e-07	2.64006105459206e-05	3.5014609755796	3.56555659507417	2.75882274797643	1.97514875926954	1.68961914751796	2.31804491460806	2.64292889796983	2.39152569048119
FGD5-AS1	3696.00874862397	-1.01087448348691	5.68616271151781e-21	2.29570457473544e-18	9.2853759324974	9.64060061330855	10.2330177216141	8.31568835685203	4.25427977986485	4.96418720024144	6.25643272498032	5.18059690347644
FGF1	3482.89362802598	-0.689152380462689	6.22123671402949e-11	6.2334975455097e-09	7.11197016057173	7.10519148789928	13.2572760721242	10.1974224800224	4.08787152598421	4.71015668404199	13.4021232803705	12.2799221066652
FKBP1A	6114.09731446725	-0.323728860617666	0.00117024990380788	0.0138363655724124	27.6008482066947	28.9318046570211	30.9308262929934	30.0125167066034	21.6560005211716	24.2567416682283	26.8521825465844	25.2715959683846
FLT1	3016.89309122151	-0.373966954109095	0.000171662489413126	0.00296949774450377	2.35203448825361	2.36279727503887	3.49411078130585	3.83064586331796	1.79466178380884	1.89585640876087	3.11874533724798	3.04661457981699
FMN1	717.895240976345	-0.486833596789053	0.000991448961775561	0.0121949999088648	0.262056566939305	0.26992576039653	0.301855661846329	0.295155677161678	0.160915927749025	0.211160952248055	0.278837001730006	0.252852547844185
FMNL3	1802.06420702812	-0.470645640216435	1.41139580154545e-05	0.000370444171468728	1.529876612866	1.58836434898955	1.26743258716437	1.51416843872558	1.11706428105911	1.14899981631971	1.07256936225365	1.13410909926859
FN1	252433.509647143	-0.403530777597621	1.09233860340141e-06	4.13072507131988e-05	265.924112277645	264.7783199761	354.820762110099	390.953341082079	200.716269957323	207.783304515419	288.362981538185	281.984112727744
FOXM1	1042.44749559257	-0.601784144702302	4.15257983936741e-05	0.000933057031773722	3.00791559528011	2.82000447612608	1.48020052494764	0.970472921160538	1.53500294498429	2.1819874697962	1.54283806904546	1.1752089116765
FPR3	52.7337493575152	-0.748771821653204	0.000578169783239437	0.00794610426647656	0.260988350849549	0.252548995371345	0.25507324122544	0.222586265082675	0.108510419648216	0.0434276690826729	0.175683528575281	0.110380363223596
FRMD4A	1778.75462227704	-0.438430994516179	0.000123110165332043	0.0022622934933239	1.903263727266	1.80009020123919	2.03994189413284	1.87533601922755	1.27949479409964	1.46611958296132	1.83043766574625	1.86621082907468
FRMD6	18445.5430924126	-0.42631471939767	3.55388056723376e-06	0.000116708417575162	33.008912870758	33.5710659322426	29.3559766678755	27.4634192598069	23.8952341447469	26.3767872931321	26.9800873452398	24.1098650459043
FYTTD1	3281.49239250083	-1.22405875016935	5.71018143226178e-27	5.918264043791e-24	8.45726273424624	9.08877277906324	10.8109756722089	9.30325055812299	3.29007413083183	3.9516897000107	7.19608679579223	6.73488065553373
G0S2	3260.94645380437	-0.910116276689805	2.22503209912848e-05	0.000549334813394543	48.3154414476228	34.7349266492202	25.2867059207511	13.8952271680031	12.0988249970583	17.7652688078784	18.5482245007085	19.9427504373058
GABRB1	40.407906020213	-1.10645954614015	2.41546647345137e-07	1.09012572142395e-05	0.252723779615114	0.292372415507439	0.0699146440768889	0.0547573815354433	0.0209945716404704	0.0388609874627174	0.0343626983103552	0.0478900371175275
GALNT10	5832.22161129206	-0.977255316085513	2.12310505075638e-22	9.71462101057762e-20	10.825919635199	10.9173690565818	8.48986917548523	9.92386163087422	5.10050337934331	5.82590263419663	6.80274789657581	6.33553374950809
GAS6-AS2	934.470896039939	-0.467772918901719	0.000265142292931363	0.00424196766325038	4.64478941226856	4.7077464806538	3.71774201171858	2.96593061024676	3.16312086596993	3.5739234846441	4.56559761072173	4.18128018878827
GDF11	648.445966971589	-0.405231635398502	0.00280171409063444	0.0274511986596281	1.33839432465626	1.27091933592584	0.779291989248245	1.02866220734803	0.988851397610993	0.970968243706815	0.793515672315032	0.752498301169994
GDI1	3872.17619720648	-0.330644694796261	0.00119292231512128	0.014068079570163	14.6715125346019	14.2374356300891	14.323058411813	13.4536900070497	10.9452292502184	12.3828137433499	13.829394665631	13.0062131246971
GDNF	156.485376411609	-0.721595781888625	0.000283260380434503	0.00447447093466562	0.379458058563884	0.446483414338933	0.893860254093372	0.716681923398209	0.216496163356389	0.20550500664929	0.597849309787617	0.653708026841821
GID8	1713.04586335995	-0.446644551208627	8.11640712016116e-05	0.00162107542819136	3.89476303764134	3.55963682074081	2.96185443540135	2.77784957220283	2.60038660006232	2.89187369521802	2.40610454487919	2.39329229979433
GINS1	509.889098620079	-0.67140365449803	4.47667261062248e-05	0.000989553702512315	1.6128545113701	1.52593293226966	1.05175445407511	0.62129625163236	0.756659116526343	1.09026975367583	0.927729461993248	0.738326066205548
GINS2	262.705968795211	-0.683152371396211	0.00025801303425245	0.00415210424523256	2.46915110176866	2.31428796285365	1.68760218812693	1.00804975076106	1.06212961289929	1.58574784208036	1.42293895238027	1.67688436165197
GJA3	749.206602596827	-0.364036683466567	0.00538471029191291	0.0449610207889833	1.40709088486036	1.30404837890739	1.27878731463558	0.892604494872324	1.05977411145111	1.04731045603413	1.037826769655	1.03240293129545
GJB2	118.578260904334	-0.792615096434819	0.000134921195239021	0.00243052919559848	0.581911829477658	0.588347417574846	4.95982710333694	2.11558501326147	0.242180306352691	0.282475385283243	1.76256329102185	1.75377495007814
GJC1	2125.91235192212	-0.657310615234837	1.24160580860997e-07	6.13076364560757e-06	2.83592807553054	2.75562157880502	1.52131816242031	1.21951265448588	1.52493552825532	1.96725174560402	1.32360208702013	1.16222123103567
GK5	4644.39045827312	-0.365149707453577	0.000133669190796371	0.00241431181850235	3.95102584474141	4.00488410411009	3.85287423807296	2.58129944542976	3.03721373603148	3.23823531450318	3.5998117302083	3.3828374306157
GLE1	1226.59658706962	-0.388132197974909	0.00168595913698078	0.0184554713503471	3.3128007034133	3.28221585798194	2.65223737510165	2.73358459548474	2.33127694636003	2.72767121524026	2.16210956592229	2.19716372206318
GLIPR1	10515.9459766463	-0.43750521963045	3.91539118977596e-05	0.000891319649453642	24.4995358635666	27.0604481816791	19.0169021361244	15.7114901447968	17.6610802083465	20.7601820466815	22.9989064852454	20.4005214866455
GMFG	154.141281448747	-0.814638263453619	5.01248438078357e-05	0.00108870843504772	2.37717449182895	2.95281109523783	3.18738509599878	2.94404225108075	1.1857154242805	1.2748448168346	2.15591777773968	2.03856496866192
GNA12	3289.04944250678	-0.417853652473242	4.8636914836889e-05	0.00106142914144034	6.14405369817885	5.47631821691822	5.25524096355423	5.59170733512363	4.21456394252451	4.56903888269254	4.73458875053984	4.8428345101939
GPR176	14450.3353636968	-0.517248845386698	3.09480010533926e-09	2.24774185428529e-07	29.057127378489	30.1319382066899	40.8367402615266	35.403941716506	20.8908159225662	21.039833117974	33.2112429821721	32.3452466693338
GPR180	2538.88887296811	-0.428366463771382	3.97267661547593e-05	0.000902863110937717	2.65220080644618	2.81094420605695	2.2007660994863	1.82216724670846	2.00669545838645	2.0976175824242	2.03059038182615	1.80600817004168
GPR39	441.681685370929	-0.504114174045919	0.00138605449025045	0.0158553083230566	1.48910675357596	1.61808775363841	1.9533385011724	1.41196595955798	0.973575815518342	1.15063053744626	1.53783246102643	1.59756287392607
GPSM2	1175.62465517361	-0.600233925916035	1.71343890404754e-05	0.000435759137062544	1.93926616375157	2.00415367398158	1.59307964891693	1.04405648914669	1.0807593631916	1.45977252453661	1.31477494072782	1.25121964288048
GSG2	148.737758367986	-0.564884599011257	0.00461727313933112	0.0400134522623727	0.546010616822115	0.568563450612954	0.299197963076835	0.210008071276143	0.30990270412929	0.351690083366994	0.317925012081933	0.307694773084114
GSKIP	1006.53867987638	-0.393193100111436	0.00335635463826665	0.0314919207925402	3.22058949123352	3.66169561205591	4.53013026675462	3.79102503502167	2.41626267872049	2.82347378854211	3.8152176078562	3.27552715732746
GSTCD	584.602256901021	-0.422283236660333	0.00295326178678669	0.0285488905262119	1.23952682348039	1.34046097251095	1.32375944196984	1.09601111249462	0.94863164473941	0.960165321001911	1.1723495349699	1.0758681030903
GTSE1	435.557393453918	-0.495462788495524	0.00269594776772769	0.0266607472031814	1.46208316992076	1.32264734362263	0.894107649412604	0.633159057231982	0.805471043201262	1.0890525337198	0.729974352933624	0.667734773236503
H2AFV	2554.01063235042	-2.34757571932591	2.21589164231648e-82	3.04175445740783e-78	7.34780113653013	7.98733188270696	6.99180275511859	6.4285506410155	1.18415810961939	1.48763616128803	2.00276675585889	1.84296851625715
H2AFZ	5675.92811270665	-0.365745363668054	0.00051864557448978	0.00732453477471318	54.3367896947416	57.9107385777997	7.84476701472881	4.35309907927577	40.7902246568323	47.4418929104777	6.46637764806139	6.56888725863531
HAS2	664.003448745041	-0.814354491491798	0.000152463095796169	0.0027039546718269	2.92791798220602	2.52773466400411	3.04581341760646	1.2716820848169	0.406313874722534	0.877435610765074	2.34307435797976	1.85298526116993
HBE1	296.067831237652	-0.787212666211202	3.44966251806579e-06	0.000113830570638195	4.05970754276159	3.87208085382963	2.8638544160812	2.07344763944086	2.18063102866185	2.00062649794277	3.39843296285923	2.94394979781463
HBEGF	158.243051381285	-0.639670176029738	0.00131949466591967	0.0152207590580498	0.651664020782356	0.788868055831295	1.14915982787238	1.34905712122756	0.380591161723303	0.41701674007384	0.866731301287894	0.951414642458209
HCG11	334.498291605557	-0.525794114778798	0.00150350631145162	0.0169169107682757	0.620225560603422	0.565660893525633	0.602038061260832	0.664608678934921	0.420950588430996	0.36311312532517	0.499014269847594	0.432330598881874
HDAC9	2159.09348409393	-0.579522482866034	3.73016436845425e-07	1.5951391366284e-05	1.53422801570771	1.49871320977478	1.85696612668912	1.48567571011696	0.927143766253265	1.09726209092993	1.59363617920553	1.50406755953818
HELLS	942.001821456845	-0.648548845918717	1.28894891643506e-05	0.000340257726459694	2.78527296166479	3.0359446322075	1.99470233275266	1.43104063545604	1.49365773269146	2.08284517481736	1.91642801894145	1.80971043673735
HELZ	4078.39881338657	-0.428302764106219	9.07651886842467e-06	0.000253238566070865	2.78122469881024	2.8437337094182	3.43239348067419	3.53189593535862	2.06247005258098	2.17381633280497	2.59880064813194	2.64157268122544
HIPK2	14723.766512253	-0.563995615914021	4.24319313300966e-11	4.41259940430482e-09	9.61499891143725	9.57186255709039	8.21686167668097	12.0873747587733	6.49459454978195	6.65050135835362	7.23680051450089	7.72620525857274
HIPK3	7210.37454364517	-0.337238146616464	0.000184059410436312	0.00315453840134043	8.12832574021868	8.33946023567116	5.47620829729955	5.58709143636503	6.78767465860176	6.49086903505837	5.43902598299083	5.19929568712347
HIST1H1D	2519.54529988537	-0.417340462997841	0.00162519846213827	0.0179622377534396	31.8219732886216	30.3072310581304	23.1128794122684	16.3333499491766	19.3362706812805	26.9818287777821	19.253101444466	18.712119042059
HIST1H2AG	1378.87786633986	-0.456456876062283	0.00107058202368586	0.0129251358303745	31.7775685202317	22.2260187511822	24.5584477891131	14.4650199783222	18.8130543685957	19.9180248478338	17.2242611272242	18.3119168810397
HIST1H2AH	997.280653240464	-0.436612655309312	0.00332178471292244	0.0312316018864975	23.5864300059731	16.7032612800013	15.7851739238218	9.47657314374983	13.3016324535292	15.8386397176009	12.5415561778734	13.2631258670019
HIST1H2AI	779.767424076571	-0.479730980590305	0.00174755203680693	0.0189783598174436	18.6796397718579	14.1208205110677	13.3777852574013	8.68647633229042	9.996415325384	12.8444816180344	10.5945107847726	11.0484881167839
HIST1H2AJ	441.55264540037	-0.600077716018476	0.00053066707267286	0.00744833017032756	12.0691538782585	8.79003103648979	8.07807831181302	5.21229153499988	5.42788585888409	7.35042152079552	7.28607399337727	6.48213197447992
HIST1H2BG	1943.16611117613	-0.418799179504445	0.000256676949652867	0.00413545127686022	42.0023079635832	41.5238778468013	33.6482564709492	25.529380450612	28.9770245881548	33.8870144668137	28.4567488464993	29.8546450943
HIST1H2BI	1247.98273451594	-0.484844462337699	0.000591100102697888	0.00808170429256365	31.0073860656262	25.132278494227	20.8910490195474	13.533637694696	17.0132177647193	22.392495388271	17.3857954151477	15.1891485530684
HIST1H2BJ	1574.12908420216	-0.391650556915641	0.00495718832653901	0.0421606717214381	35.2033172560566	27.2079395562583	25.2940870779325	14.8063589689531	20.5395219385209	26.61605997657	21.2448275305286	20.211132674923
HIST1H2BM	451.458233397881	-0.736602696947506	2.62839430737502e-05	0.000630768682820576	11.7902382221409	10.1014776585336	9.1541801432665	5.34764762404673	4.6488383544161	7.25646165220308	6.71177462553653	6.15782257675787
HIST1H2BO	907.447954494711	-0.505975997537101	0.000708570672718036	0.0093093634693499	22.5414787377299	16.0881425681168	13.6103178435253	7.90056678430195	12.1265904570531	14.2896094819814	11.6810952553088	11.4217353969331
HIST1H3B	1710.21817155434	-0.468349783590216	0.00202174193229706	0.0212499628672602	40.8001851576499	30.3680419280252	26.2580112148061	16.3070643523243	20.3738751363244	29.7125456634699	22.1328174154171	21.7742593114173
HIST1H3G	1187.24899113057	-0.51072041762159	0.00115512568912337	0.0136929277500834	30.1051597549397	20.6787012464644	19.3543003382891	10.6421088267628	14.4790164746781	19.8296440594019	15.3416056069028	13.8732989498728
HIST1H3J	617.055594197522	-0.548855654006511	0.000962608100438001	0.0119149877319319	14.8001174611802	11.3985921191064	11.9274503248657	5.64184604509439	6.92724236399941	10.0461614527834	8.77378893979828	7.37926736553777
HIST2H2BF	738.457178088213	-0.811310997735756	5.7673755816746e-09	3.99842245503269e-07	8.07036542403838	6.89301955622234	6.19552285932295	4.80813559335511	3.8138695554302	4.33947693333678	4.95588045652108	5.34014027937914
HIVEP2	6240.86296060218	-0.580560401916657	1.28586700072372e-09	1.03829978346673e-07	6.30658755357976	6.50605909206183	6.6551827855296	6.69774141718929	4.14034802304273	4.49656207119513	5.06688481980467	5.16480032725313
HJURP	607.470387470242	-0.436220720119243	0.00596062347196095	0.0484724398101943	1.91176063410736	1.79127570428608	1.47986061110853	0.963347437546943	1.10382795250191	1.5627015711019	1.07924410353655	1.03552350190812
HMGA1	15366.399278443	-0.664801119205985	3.99438107975149e-08	2.25816319926655e-06	70.1916097322618	61.7521717998058	59.1159725852104	49.5687517338028	34.9077311269084	47.1097232113819	48.68474022514	46.3191166921615
HMGA2	7296.65172239029	-0.473991126335321	6.35501592392331e-05	0.00131576626829103	11.6155549754012	11.7964176523048	5.04567078965027	3.50143418366386	7.26518243460987	9.59413429174281	4.05781939069129	4.08081555606836
HMGB3	611.404738804296	-0.550851289414456	0.000209971614451607	0.00351497603850879	1.53430446355988	1.60062981247582	0.868655968630404	0.909947047040972	0.926799064015776	1.15586374101752	0.737441937838933	0.699813809637249
HMMR	670.530264653916	-0.668771989013026	2.43664398215806e-05	0.000593046311047583	2.21982030004537	2.24424665825857	1.42964674726994	0.9286290741102	1.08340542513873	1.57696205044046	1.2211280271139	1.04680103073731
HNRNPA3	4060.87979064525	-0.381068032399206	0.000111006043159168	0.00208451430156758	6.44195601798175	6.70073025725238	6.4777959893238	7.27401226737023	4.94416922523977	5.29595441368637	6.01399799499714	5.75555355587145
HOXB2	390.20963906546	-0.461167381060071	0.00315677886272597	0.0300327122202037	2.41515510394415	2.35375669925607	2.97806212536607	2.930418302124	1.67471327409927	1.69734999201632	2.2560536967534	2.24584257658953
HPS3	2430.64515312981	-0.370473695305912	0.000322587236972772	0.00497953542015904	5.47839649579923	5.56266551670847	5.92620659101788	4.35058105087082	4.21207343475564	4.44394387622215	5.42080595520754	5.05831702959235
HS2ST1	2043.68563935557	-0.383928963752269	0.000477862194939411	0.00685435146283521	2.53812596449519	2.76290146315207	1.9274941759699	1.93934685487267	2.00414209778171	2.10385487331023	1.69939270050678	1.46384195983683
HSD17B6	264.786347063548	-0.567721640062265	0.00156032321887019	0.0174141819919966	1.60339916949435	1.76118221927273	1.34315878189872	1.71725815494014	1.17625396401748	0.926362999242599	1.54957080149471	1.23930455177134
HSPA8	34516.9968868545	-0.388432230502927	0.00012171216217809	0.00224260785264247	123.13189608495	141.275686423026	167.204306857311	151.392310314582	97.7314890684053	107.041136628313	135.082725602519	134.516292122939
HSPH1	3216.69188186577	-0.491120402403969	1.76789757501831e-06	6.40314776049507e-05	5.29829408794476	5.63338641820139	6.53833444290079	6.10469294006577	3.78517059855708	4.06078658654417	4.99607712905814	4.70306693417249
HTR1B	125.316277043923	-1.16559716232299	1.58922229493617e-08	9.82669119035531e-07	0.524831103564374	0.481995871056955	0.194748066839687	0.177313024621456	0.153511646588769	0.153350964384374	0.172291863603844	0.143820003397891
HYI	1367.0272390593	-0.807402506283638	1.06633842279001e-09	8.71287352954671e-08	11.7225974034225	9.80997559027337	14.2880754447263	12.1002146706591	5.28594782197913	6.58571971170482	10.354290422187	9.95817400519008
IDS	5037.26365240217	-0.403634940601083	9.57773306855324e-06	0.000264412834924066	6.03410311791699	5.97561955016763	5.02813223370158	4.57304920029445	4.68633666891419	4.53592585761456	5.05485377179594	4.79309433165706
IFFO2	969.527326609911	-0.517606891376976	0.000162984922708768	0.00286465305252659	1.70661871763851	1.58491587671703	2.01963139632024	1.97579342467721	0.995734573570614	1.26800482799301	1.63800710990502	1.5730753808561
IL1RAPL1	382.857690757341	-0.580845242232838	0.000275688061445742	0.00438513327863928	1.45257550741426	1.46009476021878	2.10439348293878	1.97261780723884	0.875012838298823	0.987113565948277	1.64203289037958	1.72917624222652
IL20RB	334.874301443557	-0.496129925370589	0.00254213666003639	0.0253973143612224	1.73616578092733	1.52494638246317	4.43095665056177	3.00452427709617	1.12682155207966	1.08720228544889	3.53514572423822	3.32507479486575
IL24	43.4463350206025	-0.665443627046451	0.00216382677955866	0.0223497744191134	0.312602695780689	0.236652783609395	1.55302654288418	1.18376798414535	0.105551031094927	0.0771852390366118	0.307128553670319	0.30430531070249
IL6	2344.01509158827	-0.700694969827602	2.40751921386497e-07	1.09012572142395e-05	17.4972996062117	23.6112417215946	5.44510315017311	7.21676613918718	11.4713615492784	13.1680679356426	5.07358159929109	7.50277583821059
IL7R	4155.17653392351	-0.323199951000815	0.00351173330346631	0.0326374834506987	8.52474785537669	8.18799067218826	7.45429666933043	6.03763697605957	6.08660700686714	7.43201460352475	8.41350797525241	7.39467720684275
ILK	11275.0449220396	-0.586697331888145	3.38731694769762e-11	3.54944272832406e-09	51.433195123044	51.611513268058	41.6049174720446	39.5383588899342	33.7949840591048	35.5670358276342	41.2862774258315	39.7007723091467
IMPAD1	6685.39158609501	-0.494265826199963	1.32250787594271e-06	4.9466118836691e-05	8.72771161340224	9.28588309759752	3.59444546967973	3.26533489102333	6.02227109646766	6.87425964217052	3.45517074094432	3.10753060742537
INHBA	5090.08463595001	-0.583282740404145	8.22643456646979e-10	6.80266670445366e-08	8.34742437760996	8.42374505337575	8.04186126613776	11.3202307908886	5.44897592398937	5.83610985853146	6.34970304727147	5.72728199833904
INSIG1	6180.5514935341	-0.358346719666024	9.1481376416206e-05	0.00178645057137675	19.2533800780939	18.1959692235769	8.10432421742917	8.01524235086274	14.4836514048663	15.2142258467718	9.92051769405899	9.34998474738341
IPO5P1	500.082220085373	-0.500227632597481	0.00112329915716882	0.0133502402861094	0.881909835257425	0.914620270685631	0.790481821157966	0.68773979292074	0.557421118122832	0.679195082996305	0.62187191669423	0.625748846946808
IPPK	598.582003733036	-0.428650043593001	0.00273946474888003	0.0269954290078077	1.37167375686149	1.25300836853936	1.00207065046969	0.942194624446518	0.901800572642661	1.02388385539126	0.809650290325098	0.705237517032411
IQCJ	121.898738500776	-0.894793419356494	3.08742699987517e-05	0.000726948720879699	0.561931241546358	0.567259974277211	0.660869910204903	0.430742440972218	0.138362056136654	0.276088486778505	0.44232559636689	0.385283138941889
IQGAP3	1753.30280008869	-0.617411394881617	2.11643198009567e-05	0.000528222941650422	3.09795199926182	2.83818776290653	1.83002212851147	1.31881122193456	1.49821176292625	2.24474000123994	1.65585337651642	1.59649612956054
IRAK2	466.968802852191	-1.14467905348769	9.83964400261699e-14	1.57056736306888e-11	1.5618609019883	1.62197364798409	0.794230024763238	0.707600250333061	0.606609370039675	0.693515713993056	0.551915057451058	0.528432357352954
IREB2	2737.29587989433	-0.497418793430665	4.54038715905185e-06	0.000143277918465068	3.53083111096544	3.84502179996491	3.30301339678942	3.45378895416699	2.50157147303055	2.75478599192082	2.64127269885191	2.30796274714269
IRGQ	1425.15139080182	-0.585779837517917	3.29647024111914e-07	1.43308114525251e-05	1.45030778664052	1.50419963448538	1.84169485812976	2.11373201181729	1.02466491693255	0.938226539607779	1.26038312196203	1.2754661927636
IRS1	8419.71669108915	-0.410635051490771	3.7361869138405e-06	0.000121820992318975	9.5040720554155	8.7822034341826	7.15388065654729	7.2702120104824	6.93769897599446	7.03337016878459	6.80269794977032	6.72234399840643
ITGA1	6340.0359860643	-0.487603674727962	2.11384178626289e-07	9.7045840133882e-06	12.4413879677988	13.2255683077005	8.57352376196088	11.146967066638	9.49802125444842	9.03924988728547	8.74768688853808	8.35918675694586
ITGA10	95.2710773817205	-0.631561616483096	0.00332097472420051	0.0312316018864975	0.238610290878779	0.166503169523249	0.502195437394242	0.854189430844678	0.093971527342732	0.105089629283312	0.209081595460397	0.199702204624095
ITGB3	1455.48382769968	-0.623556917217804	7.24067652129994e-08	3.75067043803337e-06	3.00728701389201	3.03531301315856	1.16496143344622	1.20474854658683	2.07560769101165	1.82197736056813	1.47015124413758	1.28326450234271
ITGB5	13853.6659605746	-0.369515470369805	1.21219785589314e-05	0.000323509168469532	30.1279117986456	29.0829806314294	56.7010515232132	57.1834036355317	23.5646111726899	23.1182437731051	42.1988232770303	41.3435208542605
ITPRIP	1075.95840908634	-0.420168515059066	0.000485235874321032	0.006938367548755	1.49011495409642	1.37525775809729	1.61991105578715	1.72545882071902	1.05091491411622	1.09486482738384	1.34187126024445	1.55935184767904
KATNAL1	3227.34441113639	-0.529980992205716	1.22019919724765e-06	4.60155889577432e-05	4.04119248998828	4.25674641279056	2.20774500653165	1.799689274421	2.66727149215195	3.09970721617146	2.07153033239187	1.93296154509838
KCCAT198	43.5757452240412	-0.599101367597659	0.00584344593816086	0.0478027308659917	0.836050114804019	1.06934224659192	0.364383169097614	0.463103821871069	0.352299619741045	0.382569551135702	0.456685893773851	0.421900105002262
KCNK2	773.533135936026	-0.391590766425235	0.00488180166739043	0.0417003680698621	1.9605401892053	1.8999777312629	1.26424414185267	0.682836901196117	1.31715327191348	1.61034209598589	1.47487369395342	1.34369902576968
KCNN2	72.7851552187008	-1.03746836561095	2.03479690640114e-06	7.14364632587427e-05	0.307170176241302	0.323154384551906	0.270894231066069	0.252476661576183	0.0819490197896152	0.0884845346221601	0.213768742368639	0.271634478158925
KCNU1	98.9631598217589	-0.751289433889876	0.000530560795403284	0.00744833017032756	0.298948937240041	0.312044769030144	0.227026689574556	0.176591476134166	0.0894628080364225	0.165595808336531	0.315484791125962	0.314802264193503
KCTD10	3132.51037002597	-0.334982141069329	0.000844520637379535	0.0107539283759823	6.8148800934673	7.11708028202277	8.15905643281118	10.1812944189338	5.48443003711602	5.73910664257715	6.89198464470022	7.17842005252846
KCTD2	1244.24001994773	-0.46370860737156	6.49736934037739e-05	0.00133918001404445	2.93458413146996	2.98372258705979	3.10994564317343	2.7508147577176	2.11945874919101	2.18615810911885	2.80569574260898	2.67638973313945
KCTD7	958.833229718997	-0.38030144522615	0.00189835927786734	0.0201537338030046	1.81545281809106	1.77084840118849	2.01806995351573	1.82825286489761	1.41526938747779	1.35141501012448	1.7448440728265	1.70063556650633
KCTD9	4307.97321634862	-0.322442925561782	0.00186495392486231	0.019937868011359	11.2807126266595	12.1044932705784	11.0554609328276	11.3673099967124	8.97397562991185	10.0212442912164	10.5754199798442	10.1144803918609
KDELR2	14763.4029363885	-0.420137039084371	2.58593226257446e-06	8.89651432790967e-05	48.205273149131	49.937988840423	25.3141944851082	25.3693686522785	36.2803962584871	38.244144019415	28.6158277792417	24.048546227946
KHDRBS3	693.07192099849	-0.405519215761785	0.00492345870446854	0.0419778370411427	3.16378031249008	3.56628130169918	3.57159636345478	2.86061409132684	2.31151513918387	2.73113624473117	3.42046089452627	2.79777100989653
KHNYN	3403.59320955109	-0.364669504068712	0.000161821476187507	0.00284785051746911	4.95405194254838	4.97008140155675	6.2533085833797	6.08786052832236	4.02799522035595	3.79969658610452	5.01296665937982	5.02136358591933
KIAA1524	850.734809334989	-0.525848698578749	0.000310010697711978	0.00481938487824725	1.9956152740322	1.97501739227033	1.54997019716239	1.12339711148893	1.14641682965825	1.54898468541897	1.30040858039537	1.2211517338308
KIF11	1469.67362666869	-0.436475807029145	0.00106070826856906	0.0128172028192319	2.7764911207242	2.8006260407863	1.87124893504195	1.34884883424045	1.76272747035978	2.33689122132784	1.53507877194298	1.38924371828557
KIF14	896.134435234297	-0.489290837786233	0.00109533627506111	0.0131430778389545	1.17784356217786	1.24728334044535	0.80346427332468	0.548194228451533	0.70167510906676	0.987876527108109	0.621213081609127	0.558380096958293
KIF18A	725.716032266315	-0.440236062604649	0.0045667690529892	0.0396759739179638	2.01117450371712	2.05907547116924	1.32601018187683	1.05144015594544	1.20861862846859	1.72576599266284	1.25273617457567	1.07780587362304
KIF20A	1613.96391081856	-0.421238651844745	0.00473489286846939	0.0408009255527177	4.41553595637203	4.54195001011825	2.60399258368799	1.5164091344691	2.59666438826939	3.98816808336051	2.55223075984591	2.32605056038536
KIF20B	1538.54626196836	-0.45916827621762	0.00237396271828698	0.0239789449844926	2.34368770554945	2.31432262993919	1.59444984477041	1.25573447619511	1.29421443749223	2.02037972570703	1.43706402598943	1.43026658586428
KIF22	775.172089742761	-0.438704896137478	0.00378112326586958	0.0346023193803945	3.25327293950772	2.95648359684833	2.49560704779954	1.59267878129337	1.87745018320836	2.61228273007224	2.05382713605233	1.78896489898341
KIF23	1711.77913129339	-0.479740765683578	0.00140619120504035	0.0160056274225447	4.31766882415509	4.71112213931214	3.4730779635776	2.88281729289868	2.48947799627102	3.84130544762415	2.6937475764904	2.62721328422659
KIF2C	983.85081500447	-0.550726068779857	0.000556307886265757	0.0077291886181883	3.07743600068114	2.98221065183491	1.69488498889199	1.18095410132133	1.52936295695078	2.43767932429724	1.6618285209374	1.44953741122637
KIF4A	677.994900942655	-0.668855086279697	2.42369301678166e-05	0.000590941990077475	1.5362823649237	1.61353120432722	0.91718049892856	0.661022022190026	0.766602720213943	1.11143057292838	0.805165889467255	0.699861129524303
KIF5A	89.76147778379	-0.591562773155732	0.00578289277564371	0.047448756205177	0.250924168405383	0.25389837185863	0.147000264417608	0.110288279584493	0.138967147925567	0.124939520636486	0.0994296182749284	0.0950980375247593
KISS1	1045.87005235047	-0.580885521865886	8.9073711949384e-05	0.00175677420104769	17.4266964055893	12.3703340609075	40.3454843363879	30.3137726954083	8.72252411464741	10.4961858037432	27.1555410449057	30.002567479027
KLF12	3198.82185046102	-0.599345843624745	2.20110365318114e-08	1.32519955470252e-06	2.94887874391778	2.95196970388957	2.07883241288456	2.15662755311767	1.80487593803387	2.0933232573097	2.08308730918423	1.95761803419044
KLHL7	1472.66885122448	-0.338783593403847	0.00296525373994192	0.0286043837583856	3.31546148629831	3.37791406133877	3.17466903808752	3.39202011499454	2.81447544053882	2.53540804749122	2.7249611364632	2.56110489484937
KNL1	1652.23909829281	-0.571446060163584	8.57371513560856e-05	0.00169875680770019	2.17219541539094	2.16900439871724	1.2601252334763	0.880248065175092	1.13757249238127	1.70315293771378	1.04201204900796	0.948107060390416
KNSTRN	759.278256501182	-0.394235775292347	0.00440839654088741	0.03871660864796	3.50435146497539	3.60151031381446	2.41078987503564	1.93691847415026	2.45452153169509	2.93026755242732	2.12642901493493	1.88475593109654
KNTC1	2121.1172783806	-0.510918704522305	1.53394490034297e-05	0.000399553351935636	2.94399812500802	3.03911867338795	2.3355931458858	1.86643758298293	1.89608110577449	2.30001623074028	2.08129313337666	2.06657929599252
KRT80	279.878425234588	-0.608730437188305	0.000571190942675475	0.00790396982873614	0.771289416388922	0.723320860883112	1.2422919110053	1.02056390064714	0.401328435850462	0.505046467947671	0.837022913164863	0.924521225031591
LAMB3	4474.63957943633	-1.16730627929484	3.09023534999458e-21	1.32561439529299e-18	13.0103460746415	10.319252248418	8.84824327956817	5.04205481904666	4.392335284885	5.48811089446784	7.27137783087804	7.1345674365402
LDB2	1670.10071821646	-0.431295554133567	0.000192545000182189	0.00326304347839618	4.52267483204172	5.0874823301703	6.4665093773894	5.71318472505375	3.54386097561117	3.62992615133041	4.57865138437666	4.80173732283935
LIF	2045.50537429794	-0.331623676652922	0.00189081313347639	0.0201334283427059	4.64336282582197	4.9060765122245	4.26127750626832	4.2804099687372	3.94329523581898	3.75475729011468	2.96706186053169	3.39643934870528
LIG1	492.194655695492	-0.437352263208162	0.00373300594838434	0.0342762358886099	1.0579887801802	0.991070141794601	1.05587504800594	0.945239161764481	0.687467451147999	0.797107610978669	0.934410937486239	0.967315919155494
LIMD1	10562.0642890937	-0.484573007099534	2.68000665349256e-08	1.57890349066491e-06	16.4692247153581	16.1212068183046	21.2290965882564	14.5083843207196	11.60474947427	12.0231962111617	20.1510305226805	20.0292845106569
LIN7C	2932.55539917084	-0.461971425792462	7.9090583659728e-05	0.00158957019311433	5.6327187093716	6.05791886792115	2.88045468659377	2.34114975972521	3.82998189574012	4.68291451421092	2.51635022721479	2.02271312442219
LINC00294	745.371363481115	-0.589789815688236	6.61656796066648e-06	0.000195744888784631	2.27940927669336	2.27726327948935	1.21056798689616	1.40758239768205	1.49346044671392	1.48763309091394	1.30113083496927	1.39364355065299
LINC00452	129.503656793497	-0.612461551403198	0.00420337536063962	0.0374917047274204	0.856860323013204	0.915351819102581	0.950607808231349	1.1037053882525	0.308111995998043	0.605960562439809	0.969201295747357	0.975992325756233
LINC00472	699.213449293854	-0.440633851558133	0.00139817856857999	0.0159541123947611	0.743791787969137	0.67169643791575	1.01625033817981	0.943929811878783	0.554051464706393	0.477092937072343	0.690256975043238	0.530669739122298
LINC01224	145.324226080975	-0.758345492087532	0.000230258105152385	0.00378533294542131	0.619490098733151	0.664521734802382	0.42606870860372	0.275370723779223	0.241671211230405	0.365322618831476	0.34709813892272	0.268743330118917
LIPA	2395.6976328658	-1.16240821995789	2.5012434554902e-21	1.10756673914561e-18	9.98522143021841	10.0467503929732	2.75427563096155	2.05573825976118	3.73944666195597	4.80931503739731	2.1761811948212	1.97373116791284
LMNB1	838.581103421015	-0.59488005404694	6.98120688779573e-05	0.00141971891775959	2.42500793138644	2.48047403862722	1.82591738952206	1.23729227181868	1.31127112703616	1.82928711633967	1.68277618266	1.42774236789369
LMOD1	3753.22188150572	-0.488154097354857	2.56957132874681e-07	1.14521122174375e-05	9.28386183066909	9.10210110477857	4.58891322030443	5.55902196375389	6.54881921428431	6.7095073653427	7.4175639339382	6.81965838494606
LOC100130872	930.160327569546	-0.472356462420251	0.000140840109816702	0.00252390624993977	1.84296933558485	1.79176198259394	2.10849907474723	2.04657170094432	1.35283902724877	1.25924110809978	1.76173849605793	1.82550961428248
LOC100506175	57.5922049132207	-0.687838532760863	0.00170211095250645	0.0185730342170557	0.954016706237965	1.24067956756499	1.1686948921656	1.43270800601917	0.509299349967964	0.299274271264606	0.345345118019069	0.373418435972445
LOC100507156	101.733041477109	-0.82070572471628	0.000106582580747437	0.00202359486295999	0.287434298728918	0.260895379116024	0.392908114153235	0.327997842092398	0.120274800221058	0.106949157159055	0.218860692077929	0.328318147555258
LOC101927204	386.601270664218	-0.566733799119767	0.000650191946561279	0.00876737215171579	1.79036722046967	1.71515019827165	1.14573625502285	0.861117727040725	0.974812734110543	1.27092962010193	1.16027349090467	1.0283231397855
LOC104968399	41.6103270707433	-0.733426324107433	0.000710229831207117	0.0093093634693499	0.407862975714611	0.375554610707447	0.59735143945299	0.0596505730934554	0.129882840831246	0.0975590434647977	0.105368072505088	0.338135996563857
LOC730101	322.186342135644	-0.523165158236135	0.00166674580251794	0.0182808276132042	0.888639465312965	0.822791759730117	0.567112013753643	0.447128243600354	0.539755789500932	0.595416602481093	0.580260111090181	0.445967269705464
LONRF1	571.488496938745	-0.424134149445626	0.00292157973482898	0.0283224046751394	1.55089423976268	1.55184690283214	0.57969582411357	0.465319964480264	1.0933670872796	1.19571257220969	0.518650890926241	0.446165099153349
LPCAT2	1102.57569243594	-0.569090635186952	1.0327199416771e-05	0.000281272750781777	2.08339567862493	2.02246734704263	2.65466123388515	2.61270379428219	1.23628919788994	1.49723229752655	1.95862214484535	1.8018409813715
LPXN	3269.12513247841	-1.26848830481103	6.76351475776247e-31	9.28427670798054e-28	17.6699952518717	18.5822401093122	19.3571351454079	11.8808774577201	6.70761378851881	7.84507771121482	13.9614184062996	13.0194418057004
LRIG1	12182.134172316	-0.491729602527032	3.57367841261633e-08	2.05254742970646e-06	25.7560929739645	23.9887383158263	21.6002102100806	14.1337767947988	17.3803177762482	18.4521630675661	22.3492392042513	21.9074065946802
LRRC57	788.776643421714	-0.458673008102008	0.000374016023471745	0.00561719688642959	3.27231324437578	3.06733834538151	3.12137083197582	2.98410213808234	2.32255165461581	2.26515305265604	2.68983091922927	2.6745247188729
LRRC8C	2620.23254508784	-0.361087541390949	0.000489735247195747	0.00698088861708829	3.31448797421472	3.48256476507227	3.2009133475053	2.81169030109172	2.61282643914465	2.75397524596861	2.74301872289213	2.549971292924
LRRFIP1	7389.73248205749	-0.421964205232573	3.06053660603952e-06	0.000102218944017286	8.89464700486886	9.19303975295396	12.2515322652285	11.036818359623	6.80688551434734	6.90743344922029	11.0371819887777	11.4400410552739
LYPD1	1216.53515241924	-0.378942533537037	0.0024190255056003	0.0243624087420215	2.77441591985284	2.87937996785775	3.44568041053674	3.0587390462043	2.38339014793079	1.9803134647063	3.12578120600725	3.08581189355757
MAD2L1	550.788423522156	-0.480363672564121	0.00353446265774812	0.0328265012874888	3.74525289938495	3.83558046674152	2.83681847321779	1.52178809113949	2.11730108792392	3.11801692187806	2.25917272887962	1.84339958333658
MADD	1486.57170379924	-0.409774421662144	0.000282741143540698	0.00447141437486539	2.2704325365042	2.14286503695385	1.85774351629979	2.26342715184996	1.6143849861274	1.73010586905523	1.44795042932387	1.58323644875383
MAGI2	1619.2733817966	-0.347741330870441	0.00443458130290782	0.0388471586120075	2.2102599401345	2.18597641250332	0.971419625253856	0.878539009585776	1.56641628078083	1.91214509754416	1.17939373444419	1.20717218789881
MAK16	1226.16611694192	-0.547238155072852	2.93818104670594e-05	0.000696587413266535	3.34742964964271	3.49008531459925	4.25392371220729	4.00315565967674	2.0564282784101	2.56968913870005	2.91021384009467	2.96819827090036
MAML3	725.009395894961	-0.433823447749024	0.00143850733553748	0.016305854826526	1.03595206777239	0.938869546931189	1.03513389750134	1.30777624372553	0.774850437460077	0.673356556167366	1.07710263216273	1.08663061685197
MAN2A1	11243.4171457349	-0.899043248017494	4.82096240567403e-20	1.83825974840798e-17	16.8718415317215	17.5217736164838	14.3936543697275	13.0922197558678	8.57496482097453	9.76425009380216	10.4960837837519	9.96484704087129
MAP2K1	3288.37162256528	-0.327364640955137	0.00186770281173325	0.0199517171180251	11.3980037113131	12.121237872628	12.785076361502	10.6297830429324	9.01095782843551	10.0157007054578	12.7654833068224	11.3828284743176
MAP3K7CL	2694.95474983032	-0.707551111309057	5.80718016971006e-09	4.00578704470402e-07	7.02837183496135	7.43611531228883	11.8185777020365	9.74399172068711	3.84232856304439	4.88168786562587	11.7801848092938	10.5611972912042
MARCH3	605.872201003448	-0.541153209962357	0.000685018410318419	0.00911167414577611	1.55045419288489	1.35824253135523	1.66864218165173	1.26449716526298	0.796512833315007	1.12168653048071	1.66582106499189	1.46676791918157
MAZ	2355.63697797694	-0.334532974563148	0.00107724244276561	0.0129827102825668	7.9622329091498	7.3202335023827	9.13433380198614	7.25099600419543	6.25734365221038	6.02976462802763	6.70266470232887	6.98558881601488
MB21D2	1480.52002051124	-0.443212696015839	0.000474771660675101	0.00681714496452627	4.02738514613864	4.44323206463089	2.25502484626026	1.99383790863566	2.81933028510629	3.4081713105185	3.02820589973122	2.93251093562046
MCM10	248.954957832043	-0.736752589004921	7.97961528739151e-05	0.00160140612646233	0.574561760215865	0.619035479621723	0.519600934635299	0.274732525535271	0.261850757368144	0.369284718370989	0.43414814836683	0.373796869796447
MCM3	1535.32234299505	-0.574664132277902	2.95688274417885e-05	0.000699812576367984	4.93927221814703	4.70869093361338	3.95693604524325	2.99935306933834	2.65761303421562	3.68720268855655	3.91247598793175	3.65959638105124
MCM4	1647.06000586208	-0.498468772531161	0.000365416366786537	0.00551822933650032	3.40452371775382	3.19949762093899	3.00818811699846	1.88623108683017	1.89674101274946	2.70186517017237	2.77315994261986	2.61076763654157
MCM7	2046.02077002002	-0.505700506228722	0.00010861028904941	0.00204793054640282	5.68692992134553	5.34491867359051	5.17502901844204	3.97292496514151	3.27419339122575	4.41930525250465	4.76903362266356	4.47648369280719
MCM8	625.590449208011	-0.440252365219576	0.00201521733025789	0.0212124766959406	1.56543800195128	1.52286559420993	1.24333080787732	0.88099004480817	1.03613834591697	1.21283952249076	1.08730853229371	1.00448818366993
MCUB	449.291756318995	-0.460247236727311	0.00331910309234553	0.0312316018864975	3.59492704388061	3.31367269118353	4.81772844613773	2.91980520479806	2.21042847128953	2.67521599956257	4.03733923687286	3.40240341462858
MDGA2	1870.81713112774	-0.34281407220634	0.00217012589871706	0.0223890005642688	2.63604926320539	2.92547165893591	1.26287857015603	1.13725511196064	2.23674730157738	2.20476221369308	1.56760301134371	1.47015315020104
MECOM	1967.34059143161	-0.588747033927117	5.3474982363876e-07	2.19119726241471e-05	2.78321966141028	3.00920231300363	2.06611022096962	1.89291579176714	1.77148387814084	2.06433482243352	1.59720852268708	1.5502299153503
MED21	1026.2334304021	-0.411873755562329	0.00073536534787391	0.00957719177444513	3.25511526931818	3.3662232788284	2.3601839408265	2.05878026104466	2.45578229145297	2.53936497906124	2.40654709653086	1.97974253187602
MGLL	17553.435404216	-0.431741429376112	0.000246995367120905	0.00402668496464648	38.0137943808941	32.0870806909658	27.0994199242835	18.9986269046209	22.670566242658	29.375073487562	28.4929470734927	27.3519405957681
MGME1	817.727446366569	-0.363524085091102	0.00476193260278214	0.0409824757607464	3.12671306980077	3.26931715512138	3.46238450513846	2.93728575302315	2.49834528839882	2.49100061666448	2.83605516395685	2.84761125980874
MIAT	912.337622027348	-0.84343498332346	2.98181513522878e-11	3.19776377822543e-09	1.00045330196744	0.94121520233616	1.92254386867539	1.44752022660216	0.502952250611592	0.546578917283488	1.96151143435009	2.04974520339571
MICAL2	11124.5234973163	-0.79836469554915	3.33778216242889e-19	1.17481373701696e-16	14.7214849435169	14.856127555427	10.0728967923836	10.9835286662257	8.30201620264282	8.77346093779145	6.76168564911188	6.83806551819583
MIR100HG	11847.6544460083	-0.415693041944791	1.46897014239502e-06	5.420578802327e-05	14.4787541468744	14.6797797310682	9.05529088958126	7.90524554074503	11.2501724450852	10.9838895726886	10.5113328920514	9.19611418070575
MIR155HG	353.441156765331	-0.645878629104232	0.000171760171678224	0.00296949774450377	2.60621397728086	2.42102260392129	1.37567343786584	0.798773303148279	1.26492294133834	1.71636027960335	1.23705713917279	0.95181448771086
MIR31HG	310.372646352856	-0.595959326359655	0.00043819250136085	0.00641949676219892	1.59333342409927	1.38804395940457	0.973647002750036	0.697497002264411	0.875218535768969	0.973351949013809	0.838281864688747	0.828766020309112
MMP1	7557.51154016534	-0.44448474994791	3.96314971722809e-06	0.000128610298270425	33.9497372166257	36.5507722403906	13.0709344603269	10.8667142786053	27.4673972957905	25.0355088205617	13.0508524892267	13.0778122099602
MMP16	805.707459323472	-0.620615402915084	5.46321803307279e-06	0.000167023594521136	1.25218164392707	1.34320454840481	1.60904046333196	2.04153907682083	0.763269499754672	0.889130396128041	0.936656640537277	0.9746506081134
MMS22L	996.562458975228	-0.524373376978228	0.000124578383518874	0.00228316084187394	1.16255037657667	1.1249469257327	1.16463833231775	0.988943779079657	0.687450159762381	0.879242393342517	0.988047446300538	0.986200648083038
MPI	1215.77991935034	-0.395971410728819	0.00154915259170342	0.0173735438123471	3.76745867381436	3.54782481219718	3.51393093267774	2.77265050762203	2.5486093238815	3.0210017117794	3.30183625032866	2.9389172996066
MPLKIP	373.389198506551	-0.529588377793135	0.000901971240852257	0.0112762834455181	3.94457429298607	4.01665065739466	3.57536243545543	3.46094000899455	2.78711305120619	2.51606654073172	2.91469811616095	2.57398134806511
MPP4	510.818665232693	-0.796494012856019	4.90925351811502e-06	0.000153588972228094	2.127140772158	2.43133824613662	1.29107514576285	1.07375705391866	0.915915947114885	1.45261253895423	1.24874996295911	1.3030990154688
MRAS	1295.52063729205	-0.992103701666272	1.66057256719046e-15	3.67656123061668e-13	2.81083540353346	2.86576568354971	2.6892338657578	3.00073388441994	1.25570965829011	1.49553647101693	1.79935181663155	1.72481209863095
MSN	23388.2227947455	-0.340818738350298	0.000529104132619566	0.00744833017032756	52.8511309601375	56.508683281404	30.7146975656269	30.2892521433804	40.9917556996256	46.7362758787609	33.8236401886949	30.9053137298404
MT1E	1343.53788293855	-0.58336999834991	1.7635184820778e-06	6.40314776049507e-05	26.8050098938053	26.4761916988274	43.2590837296962	36.36832997742	16.2054489699866	19.0748684292591	27.6630294536301	26.2754249840453
MT2A	3680.664372297	-0.41185459875071	0.00210868629558814	0.0219416325362006	95.8752636426449	72.5433337987787	165.280220926474	186.457156544058	54.2478185447977	71.4304830769064	90.2644771956478	87.3897668773717
MTMR11	828.488318296015	-0.471647553988	0.000278063193701151	0.00441268608085053	2.84755626014918	2.53263752751347	2.46780164177021	1.91097244264023	1.88582009438687	1.9646862599283	2.37061081013823	2.27425049893841
MYBL1	1697.09581308799	-1.2004238253933	1.4876466278579e-18	4.8621250620489e-16	3.91666402973577	3.83427814662512	3.27152437465869	2.49097651226116	1.30829096538381	1.82956760536869	2.11450718448117	1.77299038237906
MYBL2	405.809764701339	-0.702108766996261	1.06190088301817e-05	0.000287509140457405	1.61330799071022	1.47982796314466	0.972497608126383	0.693190591336102	0.821846379764653	0.966029758800432	0.826241614734857	0.78879844828341
MYL6	48814.2833821122	-0.350316657186653	4.18109541605503e-05	0.000937808770852736	547.745823978802	574.194325211223	574.366166642734	539.926166950298	451.824967788081	445.397690196349	580.36591751982	565.090154695475
MYPN	777.962413648404	-0.570916714245628	5.90942366915492e-05	0.00124224592199831	1.20374374569472	1.22740512344001	0.463886243008642	0.356222069570176	0.706589904413609	0.892657791869216	0.57609284844924	0.485380916495015
MZT1	764.355920576468	-0.481554718993328	0.000895244685753514	0.0112228527866105	2.9371617839197	3.27352686648507	2.08098881781799	1.57986453517574	1.94374742438022	2.43420907578966	1.90254806311666	1.20997171904753
NAV1	10636.7213186929	-0.348381825335801	5.2323264467581e-05	0.00113287295165061	7.54843545982403	7.36108016677221	6.14952504566394	6.4607172556112	5.91683293963913	6.01383131254555	7.03113808621531	7.85655373779121
NCAPG	1254.59660991701	-0.563550058349004	0.000357708741620103	0.00542677543343574	2.66040041266709	2.68598510547491	1.83314597415	1.11782060900088	1.32360568498619	2.14763927858195	1.4597226516269	1.32578911784044
NCAPG2	1867.6513644905	-0.393677529121728	0.0027856408441582	0.0273710538712948	2.83796444891491	2.90168006903613	1.91540321884247	1.5547351220482	1.86246747750783	2.50216725293841	1.86836122739972	1.7034342284659
NCAPH	495.427293446635	-0.570924851857716	0.000669900997559207	0.00897317766345113	0.887635445373293	0.782757072939083	0.489242999190358	0.328197932281261	0.430302093065853	0.63183471704732	0.441385145063488	0.38992510447131
NDC1	1641.03990578031	-0.408018963027051	0.00189204651869241	0.0201334283427059	3.25295629642762	3.23867080029053	2.22943799985228	1.66547696827081	2.10047969758808	2.78194197931551	1.69745177594617	1.56084176699584
NDC80	475.572947204261	-0.583777499984706	0.000393656344573961	0.0058608683752351	2.23266349719072	2.24431431811954	1.49875683954427	1.0534972301404	1.17899695395438	1.65707282159739	1.29774717001457	1.04812373362677
NDRG1	36452.3620628178	-0.428595119485222	1.00500734414078e-06	3.84282334624528e-05	105.684984854512	94.2881096404853	95.3877808375375	58.8668946806079	74.3620423471051	76.4626316276782	101.962401388867	99.4630519973876
NECAP2	3265.49760958149	-0.464145624237814	1.53999424980564e-06	5.66742655953943e-05	15.3722791171246	14.9137414669266	21.2971464294655	17.8155805018203	10.9485783122618	11.258033670206	16.3269745752946	15.9768620033599
NEDD4	21151.5744383797	-0.484096774918068	1.04081838260101e-07	5.21434815254165e-06	25.453435099454	27.48549238309	19.3471680480909	17.6706183204767	18.8712655104721	19.4967740013032	20.6758501168153	19.4065301354291
NEDD9	2440.33357068041	-0.398744970749063	0.000253377803532382	0.00409672215440402	3.76163121290326	4.22937933762768	6.5460278646723	7.56521470196832	3.05310652258477	3.07547289095515	5.32094374226752	5.34805620052197
NEK2	399.015184562256	-0.609177916407589	0.000247286036657462	0.00402668496464648	1.29526037181381	1.22093631604693	0.558245659004173	0.305999517870192	0.668732254371497	0.886451488398179	0.436269825328916	0.464903798399822
NES	9694.31379418386	-0.372979547326422	0.000618277973706644	0.00838646417497145	16.1699413217057	16.6022592183719	14.6800352219223	15.2539210614094	11.423795002439	14.1467884941554	12.1017429392051	11.58413458459
NEXN	3647.23605690476	-0.492491658440715	2.53645067725315e-06	8.79238849662981e-05	10.119400555988	10.8413331171265	11.7009868188343	14.9094033429979	7.11328796337669	7.90171500608477	11.0657176323183	9.93158858313692
NFAT5	7624.57227946534	-0.450972325067978	1.7566556271685e-06	6.39618349977241e-05	5.41160300502808	5.30375239554221	5.84541550277346	6.34520803433437	3.77205285720129	4.16662152535732	5.26974623989514	5.27023518442757
NFE2L3	4656.41762211004	-0.42385248419921	5.87846237032727e-06	0.000178131684232853	11.9925182033822	11.9213087316573	7.37980384050417	7.0821850482507	9.35887073504473	8.72340133930612	8.37578267368083	8.45509254711734
NGRN	2383.83202477391	-0.451289985925636	2.23808683002077e-05	0.000550577382001703	12.8354346034344	13.2300382637113	14.4868283309967	12.2994661470374	9.17830185692266	10.0513134468413	11.0337765207093	10.7088109249431
NLRP3	203.65440728918	-0.694627104975236	0.000193670261971612	0.00327806619739127	0.479480421791942	0.497472484672028	0.331758550034106	0.210758968798291	0.280544926111385	0.254865831012438	0.366780332240943	0.353342175973927
NOG	1100.36410996469	-0.548997128840355	6.83631247406852e-05	0.00139854040732546	6.65029297186735	5.01345148513521	7.47338289310944	4.0361522669184	3.67606405122226	4.12250308666994	6.15999315164247	6.62130228668583
NOLC1	1828.9567984684	-0.382371834782094	0.00074037736333959	0.00962420460848726	4.21743379071289	4.46619643223799	4.09071214408722	4.04908802470471	3.18619066170134	3.53978894229668	3.54618112875702	3.34390827087701
NOP9	1655.50403393878	-0.453289781261034	3.90134679180819e-05	0.000891077993529966	2.66170099432394	2.6197370978205	2.80780548080683	2.75524659412681	1.87555386174699	2.00637076811898	2.14487720825612	2.21542586661472
NORAD	14869.4795714067	-0.36576995592319	3.5967521019836e-05	0.000833996893647448	25.4522183883445	26.5641306988565	34.651489056132	36.9680602992004	20.2426099757059	20.8572658308532	26.4813713125811	26.1083101522694
NPTX1	14090.2057584615	-1.49241213221811	5.49356181755749e-48	2.51367076898706e-44	33.3734262996833	30.889806412413	14.8813057820003	10.2380544484198	12.1532910624413	9.90329773567092	12.777705849119	12.082940098028
NR2F2	2516.43871036612	-0.547498969911158	3.51307714120308e-07	1.51172444881802e-05	4.16923551113274	3.99771255849187	2.9942960570391	2.8835521657786	2.62483858812458	2.9781169683908	2.74433500168542	2.57563651570149
NREP	4763.01117675115	-0.581081602796857	3.15158781037732e-09	2.27693925647629e-07	14.0038554220892	13.9222534884043	9.95749326321343	8.67693613935176	8.91695147396962	9.87180069506262	11.1756841801206	10.6607238051464
NRP1	9753.65568191789	-0.525538411204466	1.242643132514e-05	0.000329937374855312	16.1599620347315	16.4182004053195	10.9872666352413	7.54426698868822	9.60194579428949	12.936836306438	8.24507089682457	7.70324081954069
NUDCD3	3207.62491591867	-0.49282753093091	4.45400474983134e-06	0.000141528062965127	6.60537697475576	6.12406280954853	6.81652598914988	5.8607578830755	4.21046838765461	4.87924184942968	5.49770885866599	5.20864417961565
NUF2	454.203851773441	-0.614994102967177	0.000171327742158248	0.00296949774450377	2.39293234216531	2.32146595807996	1.56807672707309	0.814123746324193	1.23301678677513	1.67993827987397	1.14976137331437	1.01812376987359
NUP58	2924.92232300186	-0.43015102084742	4.41577694426159e-05	0.000979246690046509	6.2538485577226	6.64040706220803	5.97181489408701	4.8853332659304	4.615129894727	5.05421431059225	5.19300273660693	4.80420548434815
NUSAP1	1193.9021222125	-0.530490534707927	0.00085928295649213	0.0109014576190087	4.77353775817809	4.97812143685539	2.84944155576794	1.98697501218529	2.47479715764792	4.02259255417869	2.6811390336183	2.46212531064174
NXPE3	2287.99826467986	-0.376990354643643	0.000664333570134455	0.00894027268947162	2.33552897695473	2.41904878017735	0.840699733797696	0.916406030999959	1.72881241477582	1.97095562294203	1.03729420624926	0.962004940627272
OGFRL1	4252.09496421311	-0.600833055854576	6.80051132734742e-09	4.59998200151179e-07	4.53313555309549	5.10869360859552	3.57093749273983	3.24320082163828	3.13684338225982	3.24618723483411	3.11395012441247	2.49436877803021
OPHN1	1265.3855974018	-0.546911683514433	1.33621778935414e-05	0.000351384321733033	1.62966856131962	1.71322840193007	1.00577381817104	0.975413028765096	1.03961461231012	1.23217865811278	1.27517687450196	1.16081791926963
OR51B2	61.8161618515144	-0.745568827752987	0.000681297373566263	0.00908859965689416	0.624220891403438	0.819064114517749	0.508519398114641	0.372960051533944	0.315326525999123	0.190032070445649	0.655337370875997	0.608461646355733
OR51B4	120.594236417689	-0.776956117118399	0.000191044079420115	0.00324562138391078	1.35821618329094	1.60488262819014	1.14028179385399	0.956999687019968	0.729702003383896	0.613945289603918	1.98693739927799	1.77325951344543
OR51B5	267.797323649656	-0.961845128729955	4.24993350522323e-08	2.37149744821948e-06	1.59938142437948	1.58938280279909	1.21773073228257	0.769981084834974	0.67204340285328	0.755257464199152	1.4535208173088	1.29002704140395
ORC1	191.665790571635	-0.652471093698362	0.000880479874554818	0.0110891801757876	0.683257359521912	0.618206081149732	0.505008166196504	0.341926067101623	0.29295675542493	0.424773033992133	0.503469373697728	0.419747145894555
ORMDL2	581.467503261705	-0.411699705798197	0.00505620904029053	0.0428171384923307	4.04658119659453	4.3118110188708	4.76463150894025	4.24057643186699	2.85914117482015	3.35642601185674	4.06647759658436	4.08279843098858
OSBPL11	844.799270548685	-0.34708137804774	0.00619959049559787	0.049913066705614	1.68667785127344	1.71804783929964	1.74488670912997	1.74698449454999	1.35280319442763	1.3379586060094	1.57914602478405	1.54957647510515
OSBPL1A	3147.27046798859	-0.408357659521569	6.51912733935978e-05	0.00134165008976599	5.9946363892235	6.27507191598681	4.78845303487359	4.72197275721672	4.50487774948035	4.85482882720747	5.14207314826503	4.98340939137325
OSTF1	1016.91639242851	-0.494066396418916	0.000559304005670591	0.00775511725842445	7.3030703668886	7.93261663952849	7.69409076286885	6.2101814380938	4.54880253573824	6.09311475574995	5.96581718728754	5.70552528463814
OSTN-AS1	84.4261964528054	-0.917342709470392	2.18731830673413e-05	0.000541973256255225	2.18697564277502	1.91046848479708	1.35238599425626	1.72955100821236	0.696436367666564	0.709941823144726	1.18944698182693	1.1008089684054
P3H2	2385.50005140743	-0.41490340069186	4.42791911877356e-05	0.000980355576506527	5.76516715540823	5.76797208211795	4.18361962495503	5.50255730014892	4.32252827392739	4.43125234789032	3.20782951262146	3.3105844596398
PAK1	1609.10659631691	-0.403518982830789	0.0013345772026697	0.0153431668852989	4.33368019411132	4.46704080922399	2.01515251812784	1.46507238321409	2.96206310237189	3.70458364242893	2.06373239540571	1.76145069585201
PAK2	4027.35808436163	-0.324175130924111	0.00100759505922047	0.012371428781681	5.82528517847484	6.28575276921163	6.08620364998986	6.49715598238952	4.9715737281854	4.87061929654077	5.97139343178437	5.78990519497342
PARP12	1302.95537872742	-0.377417867865833	0.00209690854102037	0.0218944295793212	3.56434972548428	2.92627371345997	3.72727435461517	1.99973640016966	2.56796352960665	2.43701183521795	3.23838377792592	3.05960139747971
PARVB	1541.06723553901	-0.449793528266801	9.58201148435858e-05	0.00184996162652307	6.9139065087902	6.76331256624117	6.1499268080741	5.86112347879699	4.7266735888141	5.32724737341123	5.67021068084533	5.6153838403318
PAX8-AS1	4794.27166136878	-0.404716648841281	4.2473777703374e-05	0.000951121609354346	9.99750997486377	9.66959504302315	7.9694257178699	6.55842673212575	7.10197609029121	7.94365621707333	8.38349375657719	7.88809071824589
PBK	639.947704363427	-0.518221448801944	0.00167970525726684	0.0184016872039121	2.93309035625198	3.02508455119758	2.18232392546825	1.25573447619511	1.56889016148271	2.41557488084533	1.68560542720563	1.5297901574775
PCNA	1918.01622491992	-0.399554512183661	0.000449305943340821	0.00652748671192216	12.6559651047327	12.5704414826894	14.825021812228	12.218102450005	8.9275557675383	10.3413165975857	12.476490477338	11.8312760137113
PDE7B	505.196056695901	-0.464747891630009	0.0014814468339196	0.0167235367509987	0.961318291463442	0.873055026310114	1.012773308645	1.02313842127728	0.663497835172669	0.639764726277348	0.829289854593407	0.819394023442909
PDIA6	17657.1624966548	-0.565042022866442	2.41722395850291e-11	2.65449866226956e-09	50.145715029915	50.5853859062863	48.1030500104112	42.699471562869	34.6140514796082	34.3829309221818	41.5792344681568	38.7858904580711
PDLIM5	8218.60274449321	-0.839852439626363	1.73781256487815e-15	3.72733641845037e-13	9.42265185761719	9.80819367288785	8.47492896981953	7.36236705048131	4.84668948631278	5.79882695388115	8.06520041961964	7.39060259006931
PDZD8	2334.20552920311	-0.342523928743654	0.000855038804944957	0.0108677015513698	3.29319608762254	3.39783686011155	3.18479952880064	3.53132224089626	2.66911624243698	2.68707586171301	2.9328769692841	2.79348101911414
PDZK1	117.914913435718	-0.643095201262114	0.00204631897284549	0.0214908269858965	0.546625053321864	0.576457486903622	0.308371859033558	0.298723538266243	0.259004553483708	0.327913517832145	0.327026811758928	0.253202954942475
PELO	2664.1075211162	-0.400915625849292	8.48725990719523e-05	0.00168602918590548	8.66930813393784	8.60904860961684	6.20318102102278	5.94459120074359	6.39056066939254	6.85607633022463	5.95578405931654	5.57527365762969
PGM2	1603.22439884021	-0.444694354508255	9.01025143134976e-05	0.00176943807436535	4.72094286568458	4.8015538156242	3.67034353843294	2.94913017421015	3.34499676013548	3.69136975453454	3.53600124854979	3.27620155040083
PGM5P2	1131.77104507386	-0.43757810700624	0.000763479331327061	0.00985915407443703	5.6468221242899	5.41216052537298	7.38692302358043	6.11021779232426	3.64855206594697	4.48779374130174	9.5701927025893	9.65823598530692
PHC2	4629.26961096897	-0.419819697849012	5.30590198037184e-06	0.000163305193911579	10.8736672363195	10.2164973538634	11.6785844344011	9.94295195751569	8.04573742870645	7.94504424458267	9.90342012448558	10.0961909788494
PHIP	4139.83610617692	-0.348109752938052	0.000353549024089477	0.00539840651131952	3.12117164077492	3.31467740610353	2.84660197810605	3.08969703654516	2.54154940015352	2.59853652165564	2.49337674462138	2.43729437154554
PHLDA1	9898.22320572194	-0.342755743570905	0.000168549114349624	0.00294360520696857	15.0422074689016	16.0238392733881	11.227483919502	12.9867694235367	12.6769736350643	12.2738285174865	7.56675508207587	8.40627932198266
PHLPP2	1229.55359010386	-0.346316887991851	0.00360340856349578	0.0333540049569161	1.2612023480602	1.27910149816872	0.963145174632503	1.00633643056695	1.06692623832802	0.947816688461185	0.933406506034939	0.930228192618316
PICALM	12801.5571141698	-0.395851187891	1.63293732664811e-05	0.000417417703592154	26.9939520523632	28.7121439228381	31.3171282710008	28.5063863400479	20.9743515976431	22.0543884411397	28.1638220365775	27.8155310829299
PIEZO2	3732.7739072287	-0.326881274687486	0.00386722214667542	0.0352492419703941	3.40957844873514	3.70730885278938	2.91897714386648	3.74654438387111	3.17090549827166	2.57518223450563	2.4357977293576	2.4391784335384
PITPNC1	332.780419561318	-0.535821631009002	0.00103516404018733	0.0125972489181307	0.529698415755367	0.523185369710702	0.454150966113623	0.559041302795827	0.352377084711618	0.341869268063724	0.335310745970455	0.373141482173712
PLAUR	2409.16297638982	-0.414483793786361	0.00015007994110626	0.0026720458515767	11.6154533975867	11.2015391240825	13.0132775101476	10.1788506066362	8.03272564305514	9.22877918870947	10.1213080884177	10.1356727363845
PLEKHA8	1572.97960399525	-0.434256059319262	9.70268067471931e-05	0.0018680041742198	1.66943508555738	1.75396305994741	1.57919377652249	1.36243396520954	1.29791117473094	1.25462341959512	1.43253108928401	1.39887939371602
PLK4	619.763231855962	-0.564109488110294	0.000531655420819429	0.00745458014462544	1.60848089671682	1.54215900891831	0.969618264757485	0.70004605263564	0.813349149635947	1.21874671319246	0.802549205429047	0.713960886433257
PLOD2	18994.764915279	-0.376497555413709	1.45702271819137e-05	0.000380962873383103	43.1006683907448	44.6496143833151	22.6619742445151	18.039485460379	34.0394548511109	34.7863760672363	22.0983439747053	19.263207740051
PLP2	1707.51407810165	-0.420814492622316	0.000432721055327283	0.0063461131693137	15.5574206000411	15.584340209348	17.0841118370189	14.5010804593606	10.6155405496185	12.7352053971094	13.8685063329681	13.0398533407712
PM20D2	1032.90987684248	-0.452697866375161	0.00100870807091566	0.0123740265321352	2.01932220134357	2.22627938144072	2.85097118675053	2.24467396441307	1.36217537316421	1.71535454339834	3.01711780663924	2.63364472843414
PNP	284.99257732767	-0.759473159247564	8.80810780426862e-06	0.000247764130797531	1.26941244197009	1.28329109422465	0.972776223145185	0.7651173605103	0.690245321889667	0.686142821181875	0.881835406688925	0.787248119456159
POLDIP2	2516.92884111056	-0.43119172441101	5.49997311547739e-05	0.0011723312260273	8.62919501942678	8.95811897997726	7.61461216230246	6.377442880026	6.24686307103563	6.92033208572466	6.77593113915238	6.8982814214179
POLDIP3	2216.83966703596	-0.390462761794089	0.000129301440479347	0.00234777893314814	6.02913549285216	5.95591921446088	6.8666334854188	6.2059777012889	4.63259472140104	4.62579293718581	6.35961144310833	5.69866498970912
POLE2	180.077100853025	-0.590253918763565	0.00387245375717046	0.0352735054576502	0.984982346051884	0.986898402549192	0.724636264883418	0.415492395160527	0.405718747686562	0.711718838938012	0.730462630092777	0.629456983687914
POLQ	664.578629779014	-0.637000056030722	2.16362171133809e-05	0.000538044116513368	0.792109251708682	0.770066821572824	0.574786341417465	0.338523167154093	0.415902942433975	0.550194273598007	0.431799396994686	0.430383413654423
POMK	842.455260107117	-0.350842567887654	0.00565708554640815	0.0465556434625567	4.91833708942009	4.79988066959199	2.15700018305935	2.26770458747745	3.7657638466516	3.88814994236497	2.17207822842801	2.1406946178026
POU2F2	348.592976465658	-0.55192319327622	0.000620740577762493	0.00841155568701456	0.49855663422238	0.482900921735097	0.591014424259844	0.676956134007683	0.318720096904099	0.321550107071469	0.630224799925684	0.583029958405691
PPIF	1707.91250072418	-0.981793509117092	3.61927784919749e-15	7.52754955089909e-13	8.83966856611082	8.56317037533358	4.5382417995533	3.59215952012469	3.75220233001398	4.73870881120377	3.57086852031718	3.40816931965184
PPP1R12B	2157.49270031193	-0.489883290122061	8.33539663377086e-06	0.000235917504312933	1.69839597789975	1.75514252453575	1.10030502690885	1.15668074902299	1.16622663738249	1.30580004984906	1.48294422156353	1.45642801829407
PPP2R3A	3568.61893491355	-0.452274652002064	6.52569900756383e-06	0.0001942593890715	4.62244905872175	4.80248299607239	3.6267160415006	3.43326920882369	3.35343948549157	3.61235677694743	3.76592661454169	3.78744559386226
PRC1	2220.9962050887	-0.570456231021383	7.03300121217615e-05	0.00142813620768553	7.06285154978795	6.98295816611163	4.02202071425772	2.58551610357764	3.66453008476949	5.54854498924579	3.49870329910354	3.1616094245667
PRDM1	249.729429403164	-0.606962311743916	0.000971358286845121	0.0119908589959739	0.419604174884503	0.545005695923619	0.417759921511152	0.612856371055611	0.292376051963824	0.286511593005044	0.287126507904702	0.366566051639371
PRKAR2A	3574.33790174556	-0.608093526706713	2.68888241248474e-07	1.19450773062065e-05	5.39355479468163	5.76907057083	2.37752535766908	2.37976869805652	3.22244626327993	4.05317198415972	2.21180880992291	2.06148443010466
PRLR	178.469549893094	-0.656074116277606	0.00105634591063511	0.012798288009963	0.159280531960272	0.153936354740744	0.0795758663366595	0.0667098517064324	0.0664507708328673	0.102887201255518	0.0960395790488167	0.115829006798681
PSG11	144.576557049437	-0.807687192853228	6.11267947648769e-05	0.00127598323198107	0.973622119400422	1.07409899417803	0.661207528692215	0.319789574234417	0.442360452302815	0.504339457137339	0.963274636214782	0.88018033803242
PSG2	66.8666923413919	-0.983579898354444	7.34657834205318e-06	0.000212756288821443	0.625177241554753	0.466486281576391	0.372294714332364	0.16523005909721	0.129581569811948	0.1599038026304	0.584430199724579	0.582957965008265
PSG5	1416.73293176233	-0.600664492925916	7.77703179065334e-08	4.01335772143979e-06	8.962016154419	8.46254420162603	11.5714177653766	9.50831212807477	5.76935309228953	5.68736080519151	11.9615756609483	11.3188668501343
PSG9	499.760997631051	-0.861942247373427	6.7584707331062e-09	4.59998200151179e-07	3.06223723084252	3.25264826629956	4.29566634754527	4.10519865742359	1.69847291155983	1.56919476233075	3.8118955957898	3.55992242293731
PSMD2	12886.354264041	-0.417891712894762	0.000116423113813226	0.00216257115468762	38.5566742518386	39.0441402579529	33.4645985832731	33.1628427361388	26.0841035576483	32.4804021358531	31.0937178203545	30.4732647216098
PTBP3	3983.11198801286	-0.486198314667559	5.71522284693004e-07	2.31424377639554e-05	4.62307036096238	4.7713677311737	4.74639109771605	4.38384677154433	3.30262281613304	3.47832739373607	3.59949097870204	3.56850279312021
PTP4A1	3286.4214411431	-0.378168056764397	0.000252492974287486	0.00408723002127868	5.81547936999362	6.32019253714404	7.28835011133901	8.80714970069071	4.60480594190921	4.86065757818949	5.88966452994204	5.36290543824552
PTPRE	234.010744052774	-0.517219784835523	0.00452049744923043	0.0393237442874436	0.287942907506293	0.335507176774603	0.212078520889819	0.335016468845983	0.203887195928669	0.202535608089062	0.197223051982428	0.210158240282907
PTPRJ	2073.44470393281	-0.467339927896293	9.4319878868237e-06	0.000262622510593162	2.16579256239549	2.263122141937	1.81699619885308	2.29118224386819	1.63822708805005	1.5923718516011	1.52824656114879	1.5285352058143
PTTG1	1291.78602184677	-0.67800081828247	3.02176459880604e-06	0.000101170152799538	11.2167341264569	11.9813459739391	6.6473085086102	3.80948519481256	5.74235017088879	8.23004245977666	5.82918742311498	5.36270364993762
PUDP	1199.2989252873	-0.389081882714805	0.00123770542381015	0.0144641616182019	4.6526298072553	4.62305667634719	6.35805107695849	5.48074005125896	3.36397042381782	3.75709678421222	5.4707634470336	5.17092039721658
RAB3B	28208.8443795825	-0.632998863975509	1.21356177153917e-08	7.7481685757759e-07	22.0746683321493	22.5990884426846	15.7726028805627	18.4661618798419	12.5895810631017	16.1004594889923	17.0579085723256	16.7403042931138
RAC2	559.811026067043	-0.445342605939809	0.0021116450786147	0.0219416325362006	3.75746224660597	3.43565329225562	3.82737154367364	2.77632426897358	2.45253695044136	2.74843112190821	2.66493982534901	2.33002779366173
RACGAP1	1495.74857777661	-0.502517551844585	0.000569739304706135	0.00789183797749861	4.13181512922475	4.32951691707717	3.11172810583067	2.15215679222072	2.36393044846241	3.48574822394321	2.64566798317473	2.47883398953759
RAD51	178.803749525123	-0.570203139820631	0.00418627338094809	0.0374296683711308	0.72155510941247	0.825897830317696	0.691369838646968	0.461511389897988	0.377234280430817	0.540462127151945	0.568249694195014	0.494968022833173
RAI14	23881.7035954643	-0.343582346213505	0.000108087580827681	0.00204185240966384	36.8384581835521	38.8511412505637	40.2524356215232	43.5989506586073	29.783409852908	30.9865033740182	39.5176012456186	37.4568186972321
RANBP6	2461.64909222317	-0.464147379588657	3.08232557643565e-05	0.000726948720879699	5.03653227425046	5.26189598813742	6.00036778151429	5.07770281391986	3.48493991135586	4.02363962473131	4.8984911158222	4.41711962254223
RANGAP1	6762.61050876736	-0.35883571110364	0.000112977713350018	0.00210712645537459	14.0195110760627	12.4707023779037	10.9325888474497	10.6087286763164	10.4240006808013	10.5555729480335	10.4502735901695	10.3290470720352
RAP1GAP2	1373.14557132323	-0.753790259000948	3.00245962659065e-07	1.31257207943343e-05	2.24171132800478	2.13664246813492	1.20152861865592	0.954161492310876	0.99337118070732	1.47983298590651	1.31169199534597	1.29289543900764
RAPGEF4	271.852607923114	-0.508676410992623	0.00382558775780214	0.0349161191165891	0.508412292684206	0.552897034438426	0.360749773754962	0.284306299045409	0.327996290080496	0.376898171611864	0.379731874227892	0.339770592979985
RASSF3	2807.55613233303	-0.392700539062077	0.000128993670430099	0.00234529286621717	7.47784245724839	7.70510449596762	2.68988714085613	2.73895105252415	5.64950575780615	6.06383494957336	3.18959643366295	2.83890926324718
RBL1	699.840316764506	-0.432278073209528	0.00275164139658631	0.027076545842968	1.04504496354151	1.14322681586388	1.01279219141584	0.782195612420294	0.723728971752465	0.880699939226813	1.08888973009644	0.949539070395238
RBPJ	11395.5212885907	-0.361198126730282	0.000107572799272617	0.0020367611249865	16.793302791832	17.1095601543879	18.178790743172	13.3164821115337	12.7680587557515	14.0632784158803	16.1960149279838	15.4524364808458
RC3H1	3438.01504796665	-0.391931004418916	6.26723616334881e-05	0.00129955212710407	2.84575562933696	2.98252129165823	2.73877175179321	2.8504800255979	2.26971617896137	2.23723450918439	2.42967311085067	2.35241572634823
RCOR1	1295.89120631092	-0.413738326735233	0.000342107601471394	0.00523535233600649	2.10101260608672	2.18882804529093	2.75823602463196	2.54189311222593	1.64918086691329	1.59224726949397	2.16998648862295	2.14308332101953
RECQL	3046.51312276816	-0.3276638468716	0.00488646652119685	0.0417142574231774	7.24262066243759	7.69420505993936	9.42507146517945	8.71171501814506	5.40265217651912	6.62898450403984	7.88710128493088	7.40759805574871
RFC3	345.588353192647	-0.610473837206688	0.000397006987744738	0.00589580911939784	1.20851396176121	1.28932517713677	1.13940414375088	0.719438887971057	0.656184787026787	0.873045202225243	0.952019456235466	0.8223170692801
RFC5	425.533084539288	-0.464342236775434	0.0035957418531108	0.0333054982575249	1.69865351873748	1.67774360366278	1.3531055475339	1.02563144097995	1.06365138731684	1.31254700612047	1.05684264179875	1.08914129931281
RIMS2	668.638691063818	-0.389807608233594	0.00413474142937693	0.0370722374925259	0.778422614102615	0.814089956813372	0.56681664730848	0.673446770976454	0.599668479041672	0.613067454874019	0.48122215743031	0.529557164638878
RIT1	1851.9741983032	-0.44130154188428	5.32745299470019e-05	0.00114803684863814	4.9532076896404	5.25655842868748	6.7263766495269	6.07777440619295	3.73156647846393	3.85055339031619	4.35208263064078	4.32124953691392
RNASEH2C	632.173983370487	-0.405568565394314	0.00398447170311991	0.0360308584115461	2.3610600818442	1.98954217190135	2.13857296705821	1.59975705463376	1.63063744856888	1.61799384114072	1.8468833708352	1.96514338418509
RNF115	3831.58990190369	-0.361788685703898	0.000357190072851962	0.00542677543343574	17.9134372597195	18.83781057729	22.0490483832798	20.6481235808544	13.8733023473829	15.145642838035	19.2220262149537	18.7872305395684
RNF152	152.404030943917	-0.602260561102157	0.00256772533773455	0.025615672755147	0.956347485893548	0.840523175182304	0.9621972986252	1.0933062051913	0.462904134153708	0.56064599493304	0.526149071774206	0.623283526709317
RNF168	1064.10633371903	-0.471711817456728	0.000109471099463208	0.002061330291264	1.88956086949905	1.97863704351089	1.88360200340987	1.97608646489383	1.36228408873355	1.42738258858896	1.63922609724396	1.51451626283872
RNU4-1	3857.01902065628	-0.449316081529262	0.00105820289270062	0.0128094806949748	286.315358066009	233.847276896036	332.147680785967	207.813360637794	224.465941219908	152.484397796417	225.870096564389	235.437586631289
RPL13AP20	112.502588089437	-0.884460226674941	2.46106194352731e-05	0.000596872743795042	2.22238973699041	1.84895718888505	1.83238056873281	1.2427872206738	0.773649964951336	0.838965540445111	1.92242115697282	1.58426229039421
RPRD1B	964.358455704637	-0.480081455846686	0.000265756594940223	0.00424684607537187	2.38370884359477	2.47871564173319	3.07640790974024	2.75468519309029	1.58446390032647	1.87879626318331	2.1839154338365	2.18086739342241
RPS6KB1	2123.02942418318	-0.656466646272931	2.05576995897796e-09	1.57651140932349e-07	3.80160524115746	4.11801302501129	4.21234024157196	3.82438016114657	2.43255980225443	2.58041776280344	3.24660942064763	3.0270752683712
RPSAP52	118.068368382731	-0.634824540465361	0.00219623188951025	0.0225487473053906	1.21343185953839	1.04455522822448	0.381858954587621	0.317765277099383	0.615941791868517	0.576318983797483	0.505176760566828	0.440028995903371
RRM1	3060.54650679881	-0.422408892813667	0.000782770747223389	0.0100798255601646	7.8841879321026	8.50650619512847	6.77523854402393	5.84340470737667	5.27744436080402	6.95846175292476	6.36250549554663	5.64568716654721
RRM2	2096.53546657351	-0.636294978204509	0.00361529157124996	0.0333964383570311	6.7731205646026	7.2013548627333	3.91894706087776	2.26606941575406	2.32500513637093	4.03947931424122	2.81867587881144	2.47444990779411
RTTN	1108.10392673464	-0.45085478799848	0.000474090410695438	0.00681449117027882	1.51344941842307	1.50726943827716	1.08695769241441	0.987714057234327	0.996780473591092	1.20580447293395	1.01743909875931	0.932873485223899
RUBCN	1580.17326058254	-0.450981497438277	0.000118939579758012	0.00219845630377267	2.18313572394472	2.03748910771938	1.75165773148573	1.79525288362812	1.43787974388271	1.65676016657757	1.60131933633365	1.72359646787484
RUNX1	3894.10228430749	-0.52624474562937	1.06218144413013e-06	4.0277802993299e-05	4.82963400801052	4.78294331901194	5.57361684176518	5.69656370945072	3.06125371421666	3.63763545663573	4.91782525411644	5.31016414544018
RUNX2	560.662281140221	-0.579295023249074	5.68295559620436e-05	0.0012038569671157	0.959929343983248	1.00504937720226	0.89212120949257	1.07448618710922	0.616881580651091	0.665251066015436	0.790181237277122	0.744488667570071
S100A16	5421.01991035886	-0.339042547603145	0.00124858537483335	0.0145211736495302	30.8676430041985	28.7908667584017	31.1014538124879	23.3248744020492	21.8994699966391	25.8708875266675	30.6467722672624	29.4451159555359
S100A4	9738.41472211725	-0.503334780397086	8.03271514406408e-08	4.1143686859167e-06	161.046860279389	175.701967990122	176.040151759662	170.09168193131	119.764855389896	120.706705719103	180.106051443491	165.914460441634
SACS	25582.0440781948	-0.624931733798099	2.72693690571951e-10	2.44657927482429e-08	15.5540972319981	17.0692254227057	10.1198506747689	8.87823461583208	10.0033038028102	11.2509558256113	9.51663143256433	9.05086995587215
SAMD3	210.611623979237	-1.01185774484708	4.76627168015327e-08	2.59629410132793e-06	0.978765506538694	0.91894736290986	0.5448868579811	0.562599178148466	0.380919257552375	0.400821915216603	0.487173876411634	0.512753555094734
SAMD8	3726.17800770838	-0.331540092539887	0.00071806395566892	0.00938748944711168	4.82318772180133	5.01614649817789	5.23085203992962	4.7950685107123	3.88535864835027	4.06582180357007	4.81502444190263	4.44900767922504
SAMHD1	3229.16339762014	-0.372089944930583	0.000535090246858033	0.0074798205892263	10.4380253279577	8.61715309937163	10.2278612948869	4.97998424119094	7.61762587001315	7.24171475190708	10.7662342249043	9.71814941770685
SASH1	7787.77783098735	-0.364093138387586	4.36535444039639e-05	0.000971202923878788	9.3554982492572	9.52092414473628	7.88045690429661	7.5819015643119	7.41335100673955	7.51586822136802	8.19976266729932	7.94754625757985
SCARA3	6245.35010992953	-0.407509005406573	3.47535979918099e-05	0.000809953547764982	16.4357040836264	14.5094054276561	10.8204996304532	10.0998421968998	11.2918169466932	12.3147379590982	12.1022195220628	12.4446501192873
SCRN1	12502.5830476066	-0.32349569217301	0.000409861118173629	0.0060561502359197	20.389278893998	21.1551434355183	13.0892267143539	11.4553938827884	16.3021090417249	17.5134473424491	12.4145100927086	11.6336044597948
SELENOI	2201.5951801259	-0.366767240105546	0.00184005672520927	0.0196870293584939	2.45125089324782	2.6315334075504	2.31324367381615	2.15172613283351	1.81206733087384	2.16327916406126	2.13562542536826	1.98151508957683
SEMA7A	2152.42352604114	-0.442912518175059	0.000263821823794384	0.00422576683223513	6.5911799871524	5.28720960868941	6.15475256360614	4.51626966871351	4.07067753934932	4.65466913838898	5.48364990373546	5.37448235397955
SERPINB2	8004.63654932892	-0.435665819081066	3.71519544445152e-06	0.000121424971109491	33.9927172370351	36.629756344539	6.57417526024024	4.41989714598682	26.0705036665734	26.8951404173067	9.34440751470989	8.24323017187126
SERPINB7	4750.33249172647	-1.55909279667853	2.67069139056477e-34	5.23722581689751e-31	25.5754074092805	25.2927057732371	24.1865783599988	15.0888163580842	6.61867840737835	9.27258404454194	22.9564775029964	20.6781926966215
SERPINB8	1214.32681561251	-0.390511593152979	0.00105094073502109	0.0127440490014439	2.92279099168213	3.14481903330729	4.33515439059495	4.35459920708723	2.30296753962006	2.35771369568773	3.75464758264684	3.77735751017681
SFRP1	34349.1103904391	-0.480600073741002	9.4420273467745e-05	0.00182684058656878	79.290749252654	70.7870741037453	92.8476968961813	63.2432182690662	44.8758545821671	62.2137411606792	78.02882371747	73.1514065374555
SFXN1	3647.56150011114	-0.524263219686391	3.99747692446836e-08	2.25816319926655e-06	8.35336051551744	8.31324573607977	7.72663148380974	6.26464376003227	5.77313116437284	5.93152694944722	6.87653705342368	6.35149136642005
SGTB	2129.75442403697	-0.430099229958334	0.000250345344050071	0.00406204555292592	3.42178668846526	4.05236328589257	2.87147884930034	2.6875757322735	2.73111348346107	2.85022383723437	3.22545880445832	2.82406585021511
SH3BGRL2	352.304104537808	-0.5784637320019	0.000324217136079794	0.00499498162398129	0.754228821040671	0.730195357223367	0.685450427505777	0.783870236993395	0.484130399380947	0.463343571775117	0.643331880324661	0.576768587518228
SH3BP4	8713.25921350742	-0.486623997388789	5.50569651433855e-08	2.92932930435369e-06	16.4696977323418	16.1578944785769	17.2702398243533	17.8782282854982	11.4696629957285	12.1292692134382	14.4871710651002	14.3426197174291
SH3PXD2A	6817.72603356206	-0.420889420183209	1.98511098967474e-06	7.02309756578998e-05	5.88020718248663	5.65319996771155	3.79340559641721	5.2393616087002	4.36317393766011	4.38762903801184	3.33707721404041	3.43923422485306
SHB	2429.72567398946	-0.494583500676968	9.1874165428436e-07	3.54257491246107e-05	4.05685616245709	3.81249848182818	4.42946636314454	4.32215400183811	2.83324725580086	2.79698423565743	4.18429115590884	4.28547081245496
SHCBP1	913.724434994928	-0.573733593302316	0.00036721544910446	0.00553879602642112	1.68350482833048	1.83820495929937	1.26009383058238	0.840020792993377	0.878514367783602	1.38270954114739	1.04133828383153	0.924610790441599
SHROOM2	1128.45378563242	-0.573116407515967	3.90860662048578e-05	0.00089125320729914	1.57034583092969	1.40051508199706	1.25543668338413	1.03365669187793	0.837960943376757	1.11377831560574	1.46736748567153	1.46381033989068
SHROOM3	4102.95982910992	-0.837778515650097	8.69928964228747e-19	2.91256460779707e-16	3.9417884054189	4.03056096071092	2.18763829386225	2.26337467450968	2.22707839987806	2.23097711474298	1.89267553109825	1.83537621969044
SIPA1L3	2544.04930073213	-0.41704595567835	0.00199823127416067	0.0210512054492736	3.59480359595493	2.52332040596861	3.90496937084716	4.02173616664441	2.09913281708712	2.44224502415339	3.83966400919876	4.15082208956094
SIRPA	1255.70220889101	-0.386867811722398	0.000723581813308826	0.00945062564347313	2.68452477843085	2.60178426509382	2.04137204609503	2.4786700111569	2.05732306938061	2.01568220315528	2.02715276848788	1.95438948163485
SKA2	1906.29270321538	-0.393941212090621	0.00075068115935897	0.00974891227485391	5.19595681948477	5.88497580687449	3.88583279611667	3.31962209640759	4.05245219736414	4.4493303586231	4.04971525492715	3.62301924007551
SKA3	294.564286549096	-0.488795343751933	0.00552202494902681	0.0456631545031874	0.984476188628424	1.02819707567786	0.875346898276493	0.577553903821513	0.593688222504622	0.765317822981081	0.72358024727805	0.621198504331916
SLAIN2	2198.46245266512	-0.415710497583144	9.77591052127351e-05	0.00187839817616289	3.38467771065685	3.575225297869	3.29472460882123	3.37918473268973	2.56639166546825	2.70634355809232	3.10299281720345	2.74576683304288
SLC12A2	1908.90557586376	-0.35865029430497	0.00268946041464987	0.0266365246117596	2.54710352619761	2.61527347078202	2.52992239651153	2.42451786582931	1.83415137518061	2.22337104326291	2.04913412793989	1.84411820575573
SLC14A1	2723.88707537502	-0.570868746700794	2.55841831299857e-05	0.000617212797584032	6.17647645610732	6.16256799796916	6.26334992870167	7.14729846666635	3.34127591257974	4.8110445010081	4.17431342834129	4.08155067258376
SLC17A5	2491.77741059342	-1.17120767554066	1.4233820069734e-26	1.14933910645434e-23	8.61113410339785	8.89124364027253	13.0797854464735	11.7086532496211	3.52507980409329	4.02730695720296	6.94650137813855	6.64176758626951
SLC20A1	5582.26135190698	-0.479434946151388	2.02448764291708e-06	7.12567740367251e-05	16.265712294266	15.8080223924431	17.6178874794428	16.8463492191676	10.7926117408521	12.4162753688698	13.1388631220284	12.1499520064867
SLC25A12	1138.93539609467	-0.381488310488605	0.00176756702792598	0.0191290496925998	2.6130680239016	2.76357391170237	2.09016559061335	1.78438357206701	1.99121013990726	2.16105517115396	1.89084658165018	1.84894638098229
SLC25A3	15395.0310642572	-0.375228175680545	8.11716197584002e-05	0.00162107542819136	69.5134422037088	72.2903034082504	74.1011642177488	67.4361447660806	52.3818375876722	58.6449311276657	62.9738602837247	62.3769496711949
SLC25A32	2227.8516106659	-0.378183370211432	0.000443936124449541	0.006475065822871	6.37385175813879	6.60854044382566	7.03103123447021	6.5231880846448	4.82692388293677	5.27915920607607	5.80881614868755	5.23396991919681
SLC25A51	1178.78107880776	-0.4283366314431	0.000341127332842416	0.00522617734143733	2.32800637498353	2.455957498296	2.12729181122144	1.92673228441881	1.74108129429608	1.82885181712655	2.17511074332757	1.95350745376572
SLC2A13	517.89404286126	-0.491925125832074	0.000710731617678932	0.0093093634693499	0.735211681708279	0.722454166868555	0.831005350266364	0.762837452037116	0.530275572149994	0.485317483105721	0.557641381487882	0.576447343645407
SLC35F3	65.3838365190605	-0.625200012382036	0.00433692593561082	0.0383630666074612	0.197954936613315	0.233278436805384	0.101963093124954	0.0469932634491282	0.0934252401608858	0.101562226099371	0.0742720380328534	0.0799159830866849
SLC36A1	1122.83063730308	-0.527586154088549	8.93572812313029e-06	0.00025078894151586	1.78294667914983	1.78817369869512	2.21616657488124	2.48929220487357	1.21178592385327	1.26020869087887	1.98256561474502	2.03157649540697
SLC38A2	51562.1797407832	-0.389302095091103	2.31061786712356e-05	0.00056538059647068	95.2902207324017	103.532148450227	75.0415882984605	74.027456802208	74.8780381720918	79.4202467574205	68.7252340944346	63.8894554005964
SLC41A2	1180.98534587602	-0.462378585815955	0.000107273138225548	0.00203389277406368	3.11955660782686	3.33164239971448	2.36562107233085	1.96855992646067	2.39691778080295	2.29512290176255	2.51680973707577	2.36403513044294
SLC43A3	493.506768685606	-0.586492146968701	6.15572559926618e-05	0.00128029765607768	1.73324896075685	1.68052357502167	1.67242126440857	1.0741949126278	1.11199007223932	1.09255495542321	1.48018493363487	1.62514885814461
SLITRK5	1543.18956690183	-0.659596763780253	1.75700592274016e-09	1.37036478985535e-07	3.63124776583907	3.48359530762105	3.62002675445982	3.63668636983203	2.24995367674781	2.23532840142328	2.77860673904142	2.84151794837527
SMAD3	10475.8109641185	-0.439251669402974	7.03476385755608e-07	2.77489090438713e-05	14.8367954240292	15.4085827045789	12.8974476293779	14.049566152737	11.3226470032814	11.3385952327917	12.2642099423707	12.2154099446746
SMAP2	1609.21861454716	-0.325748518415652	0.0039609045727248	0.0359123758717262	4.463634409372	4.680381451873	2.99843400874131	2.90869378184931	3.56064260811192	3.82811947339983	2.67093752622056	2.65362378951701
SMC2	2042.4693669021	-0.392566976419957	0.00198684720257754	0.0209473514207234	3.04093756043002	3.10862768760859	2.2992341357612	1.93661669836223	2.03605022522113	2.65644868906454	2.18521234677971	1.83302680314146
SMC4	3841.28388738743	-0.433461795910008	0.000645839683203788	0.00871724811341042	6.34224843761848	6.53760008031417	3.6099259072953	2.76538100763624	4.02006496701557	5.50030404391855	3.31044589322449	2.83966493638212
SMIM12	985.946626041907	-0.379681678231553	0.0019155320512064	0.0202957246261543	1.43885959268444	1.48113545456921	1.81346677995067	1.58340896868272	1.13868455534968	1.11751915000664	1.58556380876165	1.46312357545697
SMIM3	4772.52095043708	-0.576087198846292	7.89673379187406e-10	6.60966248543019e-08	20.0673052620119	20.6903871851736	16.7796150153381	13.3336229932601	14.0841418212435	13.5103869253578	15.4002615996833	14.9963873275918
SMTN	2363.55354580654	-0.618219315368292	8.442332452734e-07	3.27649399311586e-05	7.21272377614496	5.30786350996067	6.00375261746786	5.51726771619742	3.9405911201807	4.08158801844134	5.91822862250965	6.38231379844524
SMURF2	16861.9026072741	-0.405791181090718	0.000103427377558975	0.00196913677080728	40.3484914368151	42.3878366811022	37.9008964207142	34.8471422418989	28.6546659289658	34.4708920660595	38.81532627312	37.0929140716607
SNAPC3	2128.24028092581	-0.373404079780212	0.000302692036625162	0.00472165180312909	6.51879496622474	6.39594034971325	4.63611625523547	4.18850313224674	4.97685647889535	5.12044257206654	4.81876389879533	4.57793843083871
SNAPIN	835.539385926738	-0.397794080065475	0.00181868135841775	0.0195191860883507	7.46458755068129	7.63086729655868	7.72733519236621	6.14261877797854	5.68470934322607	5.78981922398432	6.47817543630068	6.11454940880356
SNIP1	591.087701148071	-0.451398923051076	0.00154881547292308	0.0173735438123471	1.2372381340634	1.25479718088538	1.57770251216896	1.59058599778053	0.848410927905374	0.951575202450268	1.20604564342729	1.18560015547169
SNORA23	943.366632626627	-0.361439987101551	0.00439253268876985	0.0386961803929095	48.9400888631707	44.9524246282684	51.5270926846671	34.3828334688142	38.9281014110434	34.2979399101507	41.6460631211145	32.2136515547305
SNORA53	1975.69115824244	-0.471936394475489	0.000319424455831065	0.00494333653347579	81.1417170421493	73.0867790858303	90.4573267106592	75.1593686128762	63.9034871049803	46.3976873712369	64.0932911433951	60.5926180402568
SNORA73A	19709.6702585514	-0.456304712707145	4.51803918759675e-05	0.000997092024568176	936.107454630564	902.670604285179	980.947576079541	748.154052005328	767.782185023927	580.05180221869	799.031839729725	738.988169633248
SNORA73B	15544.7079382203	-0.461345292974441	6.49636472211031e-05	0.00133918001404445	983.850960574293	921.015990387802	1031.48184905505	958.644695771831	797.642906902358	590.514922486714	798.372341002237	756.523955408032
SNTB2	9190.03473485094	-0.681473929540784	8.22019657408322e-13	1.20041104651532e-10	9.59819259063999	9.72260978939491	5.66277807051237	5.20467230272972	5.72141505141577	6.37726794356322	6.81302899701442	6.00756585324551
SNX22	81.268672182304	-0.760692076080558	0.000530221194510047	0.00744833017032756	0.310707649876633	0.237833630296944	0.402367836572268	0.0256291019381372	0.137359321829655	0.0547620416061621	0.08508639619044	0.291031555633082
SNX25	1739.57714026028	-0.39896665682382	0.000292026022423824	0.00460234352446824	4.93048492320324	4.98839930434233	3.42595741133295	2.98936991142572	3.65522252474751	3.93882946925381	3.61474387449271	3.41544830715192
SOCS2	822.913434333213	-0.366534024686088	0.00532095289251582	0.0445914043684766	1.88568084424619	2.06417627977266	2.05004500352157	1.93058209007739	1.58834027489371	1.48279295977675	1.90278906648405	1.9223869753275
SOCS5	4585.10347930104	-0.331486371837088	0.000825485001869173	0.0105506821421398	8.75382504374915	9.44589517012506	7.57166226822158	6.81432709541926	7.16729772334796	7.54000406495094	7.11357607965921	6.68878052846167
SOX5	1223.49390975016	-0.40977941312349	0.000913196598760157	0.0113958633738006	1.44737485187754	1.49348159221652	1.46580157708356	1.28085599860833	1.02951654014084	1.19094776886405	1.27936252727297	1.2930094824637
SOX9	659.020871130386	-0.712284420540436	1.62585824594356e-07	7.62581891022106e-06	1.8287221817199	1.68847322287581	2.37148825149385	2.26426539909652	1.0363841675886	1.04350411259192	1.65895578045866	1.5543597767821
SPAG5	1158.23686786698	-0.548641911755433	0.000197757874061252	0.00333901886499238	3.02643860492016	3.07468394671082	1.99148519984301	1.38856875521461	1.65578970965162	2.40426166858034	1.71983319803404	1.39550867039265
SPC24	706.705238475023	-0.511308240007685	0.00141398679538391	0.0160622737811739	2.57826567844598	2.73206907264208	1.39259322541826	0.965899761470538	1.44457462335312	2.14993172547889	1.30973210734203	1.33803968850984
SPEN	2090.77234493341	-0.34000855640858	0.00116742343222892	0.0138148460812124	1.6492755658866	1.53051815747256	1.56173504112597	1.81845448483471	1.25029224727557	1.2945674378048	1.50187137527979	1.58909577363765
SPHK1	573.956623215074	-0.905444180123762	1.06184121142892e-08	6.81116556508634e-07	3.01888337323219	2.19875990029574	2.8173987494654	1.96264460804333	1.1907127852633	1.35720700199379	1.82169899436224	2.20325447648222
SPOCD1	3396.58828924367	-0.669461902293529	6.52327995431999e-09	4.47725319664752e-07	9.70356593998747	7.96648116323708	3.98651423790421	3.91211603933546	5.08476655409712	5.90834789732255	4.94361274951276	4.76207991958921
SPOPL	1284.98883243379	-0.438794411967097	0.000242279985980907	0.00395925877090465	2.11218565185274	2.19339239574401	2.12143956137498	1.94902454722309	1.51087700217175	1.6763168610487	1.93284875295137	1.62589128969264
SPRY4	1421.68210468815	-0.43434438461601	0.000123308507498837	0.00226290893373869	2.51661843000806	2.4138257303554	2.94935298189752	3.43275693010364	1.78061183399575	1.88831189353733	2.05221539306649	2.16684938656065
SPRYD3	758.535449440398	-0.612594134510164	6.70667571834535e-06	0.000197559093531602	2.69870892276183	2.57371895559856	3.16642895620607	3.17433368449616	1.55943768515088	1.81364087111558	2.64050029186613	2.21421085218245
SPTLC2	4444.57323778739	-0.371027168644454	0.00010813919296464	0.00204185240966384	4.97681614151098	5.22353604436989	4.27251478957222	4.09333074386663	3.96111814490027	4.05308421265062	4.44930061287136	4.12437399770448
SRF	2415.24694729944	-0.443888457384979	5.69524906945575e-05	0.00120460221843481	5.62626007654263	5.2590915262288	5.27424782783955	4.53262342379533	3.73680004163277	4.31364550279852	4.93745588700992	5.17544261318095
SRPK1	3508.83338842391	-0.356585350010638	0.000869855689867065	0.0110050774698665	7.1460300928898	7.77880182494148	4.44915697789086	4.08089333275983	5.56710760656326	6.24350893082956	4.85969020745923	4.50282051343524
SSFA2	14406.9505966104	-0.61613629798413	3.86846388566924e-08	2.20341924309468e-06	18.0664036495519	18.68668853772	20.9038546372243	16.7247320969285	10.5012064295058	13.3891673626114	15.9543700377182	15.2236188291683
SSH1	5378.54348082788	-0.333458943584587	0.000236033652098166	0.00387100829432679	5.46291810408554	5.37190224797528	4.22546761581752	5.34771112383101	4.46967828733717	4.28574692843919	4.09349129990964	4.00625223166666
ST3GAL2	937.740487362817	-0.445184999300566	0.00125978289562231	0.0146179541912151	2.2983209616663	1.79359515462326	1.49575010621982	1.41201321636753	1.58554779333847	1.37946608312319	1.19000495274256	1.29233081216426
ST6GALNAC5	710.953775352791	-0.724604202021316	6.0557731442411e-08	3.18496543873554e-06	1.39419210019715	1.27317250330794	0.580163937888103	0.491416270690171	0.774890893428356	0.791175352486817	0.771810333266643	0.658124204835415
STARD4	3796.13822608823	-0.393617219004368	0.000281688022160814	0.00446504789861604	6.36807098206868	6.50754051208604	2.36826183840053	2.21560913235885	4.53365818026191	5.36678485380636	3.46150407083509	2.85248147507454
STARD7	4886.30515172964	-0.47841459228574	1.81996981260714e-06	6.53998052818278e-05	13.6619715479119	14.3332107836896	16.1217594159013	14.6898083082228	9.63231939809348	10.6643639752809	13.1896722786792	12.498123847826
STAT5B	2334.91507150183	-0.35115932086213	0.00194566090144339	0.0205922029252995	4.29562651742503	4.26284899397737	3.73431295975624	3.55968691752069	3.10128234870559	3.67705501277088	3.78388151101616	3.42452545602946
STK35	1775.65625703732	-0.39755939309723	0.000210707620748516	0.00351871473237819	2.72525529935298	2.52389238906198	2.90335430993183	2.48472893049257	2.04544796536034	1.9760831319893	2.80747104366212	2.8201282023733
STK38	3167.72891180944	-0.330088123476318	0.000799274790115851	0.0102538738728227	7.91156206821634	8.22945388185598	7.97611046384879	8.10319178296794	6.58593236481569	6.47061305768989	7.6499032036656	7.56190330152463
STK39	2790.21089891378	-0.350988747369397	0.00208794976502644	0.0218288548549261	7.78984825966144	8.11741322995558	8.16538426603119	7.5362781561263	5.72321385190023	6.87874691161614	7.74843056794282	7.19185962915899
STMN1	6196.31510108132	-0.655473093141884	8.83026237210367e-08	4.50605991010658e-06	17.4408575309644	17.8861365459649	15.5858642372768	13.000082283202	9.40751484310619	12.7141132338358	13.3369178198669	12.5227527763686
STX1B	267.121690842067	-0.612533552318946	0.00107845226473809	0.0129858896825085	0.557183982159183	0.640716941421222	0.301544188104032	0.371054187737472	0.288008330983167	0.420764002179767	0.29746671911527	0.281759327413669
STX3	1404.80978654722	-0.370102245473657	0.00248146186035451	0.0248272791232408	2.10194535427021	1.98244946686124	3.06143253379717	2.2671141594135	1.45051900764621	1.72506774153033	2.59080840971341	2.49687975346837
SUMF2	3243.20336126448	-0.408146075737686	2.04528884071454e-05	0.000511396719790319	15.1662874526011	14.7854292808592	22.3518206339038	22.3319643021188	11.5256518634425	11.3595421495449	17.6993576308994	17.5690788516477
SUN2	4070.94696367424	-0.477461415281188	1.58367783802721e-05	0.000406339171637375	10.1235899838925	8.21328437756303	9.33507581930142	7.81831122132476	6.29127853443065	6.91262603343759	7.34609821186212	7.17388391043221
SV2A	1360.87461668398	-0.327772339057517	0.00505037248563973	0.0427941130310967	2.71770424766531	2.8261484143832	1.00544893979495	1.25819227828682	2.14118554819462	2.32532621954314	1.22590304809231	1.11145364721747
SYNE2	3358.65704495129	-0.413576845355148	4.03600788566713e-05	0.000914229046972818	1.42876770438882	1.43766969009503	2.08554297279194	2.0692717610041	1.04075043554138	1.13768299215872	1.7323234342696	1.75555605992931
SYNGR3	378.321808824614	-0.506110809789316	0.00222263825905973	0.0227687726732186	2.04815707061813	1.64665782879291	0.731520087157204	0.454523643796422	1.34285415661958	1.13575388484407	0.811249526385118	0.793749345698621
SYNJ2	8374.85613372106	-0.491177843900644	2.43649122785626e-08	1.44162565020616e-06	10.7128448178315	10.7961320329169	9.57627819841801	9.49069393473906	7.72218037464646	7.79751912838977	9.40859992737463	8.92581194495338
SYT11	2390.0277311839	-0.70454447119634	1.9263716478434e-11	2.21347733131836e-09	4.64131734187792	4.7360788534211	1.05912974602508	1.11552764364909	2.7619889847221	2.97977416089126	1.32957870437342	1.07664660399416
SYTL2	6379.86863973373	-0.454206909857643	2.59052312063889e-05	0.000622769017110509	12.0903827256282	12.2812398871028	7.45825603203472	4.77734899647002	8.08307029783645	9.83070007355918	9.67883599944268	9.20852083633933
TACC1	12117.3659694004	-0.475903181564491	7.67088817693968e-06	0.000220289292897178	14.3015082545541	14.0574756906604	8.35263203279089	7.6284882798288	9.20074186303404	11.31687425966	8.10715369215044	7.69309795015279
TAGLN	51398.4243533734	-0.534861752651294	3.55414899505419e-10	3.14760021000703e-08	338.805999703065	311.008021272852	284.149461019209	295.218361254375	223.151059254749	231.215246303297	296.891667529835	293.142812362669
TBC1D4	893.519233842505	-0.856188153690415	1.59273894510683e-11	1.88478685340357e-09	1.5279220585494	1.49458189301148	2.3503735087942	1.90712201314048	0.777743351009279	0.840883392062085	1.08773501224805	1.07413166788951
TBC1D9	2702.36657289054	-0.543463531151572	6.61894522186715e-08	3.45468673234108e-06	4.80169916464183	4.93578712580058	2.97354563304324	2.20741592631259	3.32954350574208	3.40039071108789	3.05925666159146	2.95062884017867
TCP11L1	1216.06181391367	-0.35323410467771	0.00233857450964338	0.0237262470760345	3.74716726430108	3.80782247937557	2.84968907405085	3.01866716762355	3.02877919146784	2.94115296040114	2.83300062917338	2.74257301984393
TCTA	579.150992945393	-0.408227786606979	0.00415901113168024	0.0372411910010272	2.59327741711683	2.57153521641481	1.80420352478163	1.34066384043662	1.83052716439347	2.02764939893966	1.7162703350086	1.56891592576934
TEX261	2022.90221128399	-0.479115333616902	8.53083646601624e-06	0.000240457478786458	5.73139284226059	5.93214580762889	6.28166202682799	6.74920424618419	4.07619553853184	4.34952977565339	5.46972511248023	4.93141416720625
TFPI2	1738.39228026903	-0.381013437038282	0.001108097150429	0.0132268257251642	6.66293806714516	6.76091679653129	6.02356525390941	6.57604449419531	5.663092419386	4.71873727415541	4.45783460853748	4.08603395941289
TICRR	282.953799279842	-0.555383236673997	0.00232902210805649	0.0236643127145014	0.466810590416889	0.404540170589724	0.268604621705682	0.217393332228821	0.227373508967554	0.319230376892341	0.268860676676415	0.27884286484842
TK1	1044.53506753204	-0.570527590837181	0.000152751316816031	0.00270546055450596	7.25678281466255	6.01316030413166	4.52085389993816	2.61872456729332	3.55539450977636	5.06970615522242	4.45852455814964	3.96653360877397
TMBIM6	23707.1525587277	-0.585639296141577	3.19131225135932e-11	3.36978025187764e-09	69.4986695925249	71.5566623332836	98.1102867267649	75.0022680732042	46.1193122729929	48.9233353572578	73.0079748635082	68.1499772539938
TMEM106C	1585.73097808161	-0.468903599024932	0.000146251748181666	0.00260726980167496	9.54452015508474	9.84457360900673	11.996139336314	9.48611895074155	6.29930355593247	7.69519335281888	10.7983416184628	10.2976038600911
TMEM156	499.906296661073	-1.32433614998298	1.11793123338189e-15	2.55764034010553e-13	2.86489000798725	3.55236790927242	3.49043876680774	4.6034867756092	1.24472394774892	0.938386631213024	1.89448506542898	2.07469711822663
TMEM158	15000.7676491163	-0.937719324237845	1.70789040702138e-15	3.72130343129881e-13	97.6284190945985	81.0856286846017	81.7050808028997	37.7972951303859	39.7562028788602	50.9387830790148	66.9560836509635	67.6589523434177
TMEM167A	4275.36207965954	-0.384047517797916	0.000154591446896163	0.00273111556183221	8.45537014406275	9.08983736413954	9.28926850768861	8.44735034063343	6.53563029035628	7.09509681810316	7.33257955621305	6.68128464330715
TMEM200A	4455.01527563644	-0.37525845008438	0.00017176230852597	0.00296949774450377	7.27835720920722	7.67560658327487	7.11896023016513	7.08181856849756	5.60038458176503	6.09653052283269	5.83541849099104	5.40241015049608
TMEM245	6066.76606332935	-0.574278775449631	2.39623514261948e-09	1.82739554459653e-07	7.5674669482339	7.55557359761496	8.10264281026572	7.61428505322351	4.86034440904778	5.37450485663884	6.72544178942776	6.28016986147423
TMEM265	182.349389223054	-0.530095434612105	0.00539588937924297	0.0450269747774275	0.864766618747288	0.914055901408656	0.398360716553729	0.514541424943176	0.56734330763098	0.554626480432187	0.466709259494342	0.542029702246988
TMEM33	2169.71516503592	-0.737352990675268	3.16741224144658e-11	3.36978025187764e-09	2.94803863210666	2.93956276938592	2.18340797044009	1.85830921142837	1.63010864715676	1.87176142546389	1.61265474574772	1.42612529356597
TMEM41A	590.282974394936	-0.541779728542152	0.000241889675583	0.00395759186737526	2.02596952121416	2.15131584160524	3.15537638675327	2.70123809303488	1.27254062151529	1.52641523258228	2.17957113395693	2.2402684508308
TMEM63A	1357.69135317335	-0.355990776491233	0.00217088655576905	0.0223890005642688	3.03622130733622	2.67672971468744	3.58574819702285	3.44405146588166	2.2186189203747	2.27683671840289	2.94144388866545	2.77166076808727
TMPO	3532.23865208053	-0.431230485090608	0.000308520979866525	0.00480166382157345	4.83850378538767	4.84934562308897	4.06344574758586	2.79731936088	3.14416302072315	4.05874200345811	3.53533051748165	3.15512086614194
TNC	48114.0310591917	-0.769493825317196	4.33483619166069e-19	1.48760741007316e-16	58.0896012520793	59.387228966541	16.4941120040382	18.9230358840427	33.7827451261283	35.58724339651	21.1087434261029	20.9601006711591
TNFAIP1	2959.50928697602	-0.346013459846685	0.000403219514986243	0.00597731563954229	7.26154573328599	7.1937374317368	9.82112609321826	9.73173263212374	5.91053136783509	5.64188964801008	9.43266353070831	9.71387371563693
TNFSF18	51.291148787342	-0.78093774705048	0.000361563860908001	0.0054720916413276	0.880418503249501	0.864218463485223	8.01109328700746	8.13328298313766	0.320630333068067	0.216973846666839	1.81814047427687	2.2737643817832
TNFSF4	3698.37072883298	-0.869883619657185	1.2596540907164e-15	2.83463470545312e-13	10.0316931158362	11.4805749334625	17.9343989979205	16.8689308705333	5.59555536176517	6.03539395301214	13.1294238528131	12.7946591112486
TNIP1	6120.07414128229	-0.35544845250522	0.000297024961938284	0.0046652081223829	19.2418313822013	17.4531419886717	16.3090473135248	16.0896826657238	15.5028028289767	13.5954488885458	15.2781123672462	15.56405643583
TNS1	5452.8757356278	-0.436855874695016	4.20857004422436e-06	0.000134664431228596	5.39880348560677	4.76426507784983	4.6987073619098	4.98924804634011	3.83888786618028	3.75983835424978	5.53405805607242	5.33687679312241
TOM1L2	1788.00324754507	-0.335994203171138	0.00441326811912516	0.0387346109151094	3.05858931312654	2.59039652375808	2.36156200868808	2.49941391670247	2.12212382243649	2.38549770147094	2.33276379974883	2.27216901042527
TOMM70	3391.77113818727	-0.407093623903183	0.000119544243628227	0.00220562343049016	7.17437584250335	7.51774127973747	7.16274810430547	6.60681773800179	5.2500829623381	5.95125435080439	5.85123885421582	5.80964987972378
TOP2A	5941.86240149825	-0.403109575761601	0.00206713636920666	0.0216607488092365	10.0647970060915	9.62783950084302	5.15581772182444	3.56702984746039	6.08107968279148	8.76856448021092	4.39638201868253	3.99506953641776
TPBG	8017.26557872881	-0.363950552455657	8.24376264562279e-05	0.00164241117324331	21.3307568764472	21.7732246554738	23.2908839998805	16.7526937065953	17.862703245986	16.2052068717912	20.1531770252451	20.7955513409987
TPST2	1617.39890378744	-0.454342458171808	0.000117997384744559	0.00218589757137458	8.08825274921003	6.98728808797595	10.2718218499952	6.71274170825938	5.19743639104656	5.81092559372028	9.26357073201996	9.57747803664942
TPX2	1956.53206455488	-0.504266847979638	0.00013388355409745	0.0024150059751586	5.24789052128075	5.26873788233072	3.35711581471086	2.40269207168987	3.11192353460764	4.22856075612206	2.93986584083191	2.62218305176482
TRAF1	369.070398715013	-0.560494804402611	0.000497172654542337	0.00707221661026182	0.78297910751646	0.85066776470458	1.00172245759199	0.952670719277627	0.520839757825161	0.540466438604437	0.622753491509797	0.636466444117698
TRAFD1	1759.87053582758	-0.369852200558361	0.000945916196531668	0.0117295317342278	5.04082750880106	5.35338207873199	4.13890992994726	3.75221167533456	4.26128055561431	3.86799051220607	3.38653309503821	3.31827001562135
TRAM2	19346.9612792282	-0.615525047164354	2.55323108952077e-10	2.30580283985866e-08	28.5203030271387	26.8244345835428	19.1305106758226	15.5894870456823	16.8104698350061	19.4819577862211	18.6327809361248	17.9741333330858
TRAPPC10	1390.23306879126	-0.406468306061226	0.000316620131749047	0.00491101078928719	1.90140413539587	1.89019523068902	2.54040792730108	2.40434641520467	1.41541642317829	1.46716538245489	2.06265535836214	1.99417268744074
TRAPPC2	975.434407071159	-0.402211510476888	0.00226190164450965	0.0230848504640773	3.26904110448981	3.2289481053294	4.85172830749498	4.06384013118428	2.22627245159073	2.68379958030983	3.75097928186866	3.50558525308748
TRHDE	11474.1829899289	-0.327415703106168	0.000248804729547541	0.00404182547041313	18.7520260890238	19.4145905245313	12.9025185254855	11.1980795577193	15.1915200250351	15.8059507090616	14.6587557443887	13.7803382335745
TRHDE-AS1	1298.07739535192	-0.419860925869071	0.000251864056410745	0.00408186293075595	2.053531140194	2.05764545893347	2.13225955680771	1.80900136132593	1.59348798751171	1.49773124272977	2.13690166559329	1.84157146899026
TRIM24	1150.00925841106	-0.497837960470015	3.66560190947578e-05	0.000847099619720103	2.70135733897466	2.92088009732094	1.77817977193811	1.44532409427536	2.00754823572537	1.97183924388435	2.01894068995764	2.12880424609933
TRIM52	434.449880004548	-0.541850251292553	0.000364855182596268	0.00551582278799447	1.27820712878	1.23894347526762	1.17270003207866	1.174532800225	0.863827283428064	0.809801985136247	0.999567866118668	0.98331486429655
TRIM55	1106.29743445513	-1.59350522537592	9.14104060462932e-26	6.60416128314456e-23	5.05028558475705	4.98596378653523	4.6023229049028	3.82293864117931	1.1342886192552	1.73122450507796	2.61958383804995	2.60673253531823
TROAP	379.403848622406	-0.555345695817382	0.00155249770818642	0.0173801014558956	1.50090980462801	1.21887777081612	0.902287387370728	0.513649966323937	0.713428964874478	1.01426904760249	0.879104332685289	0.802861275752351
TRPA1	6569.9313416422	-0.484250877828768	8.0219056613988e-07	3.13722789213736e-05	11.6276311920489	12.9332836678667	16.1449221043593	18.6548238706589	8.83958437796035	8.91775051641556	8.90484696801927	8.60059564175007
TRPC3	336.440777859088	-0.456564116069066	0.0051851667693521	0.0437623329697312	0.90434071550506	0.91863082875025	0.412062636751397	0.390570754755885	0.628497070173232	0.656856994772558	0.480753994081258	0.491900915066033
TSIX	91.1692851823776	-1.1444648892916	1.61671256593599e-07	7.62581891022106e-06	0.0277565524111212	0.0384799312769503	0.0618856542993401	0.00539506688223532	0.0100292214647863	0.00541453086450858	0.00861800548382586	0.0339585398707398
TSPAN31	1025.83084593895	-0.382622864393445	0.002636684970583	0.0261704805431618	5.15289108130625	5.82310308815581	5.83889045743913	5.03195531154875	4.35451905527535	4.09768501360839	4.87003104141954	4.84156479014633
TTK	732.728776018031	-0.461170421920432	0.00537305069761717	0.0448909719575112	2.4136246944367	2.35300778211662	1.43526432887762	0.863344704132476	1.2800297236124	2.05658466708304	1.22939205150534	1.02486184909181
TTL	2987.22255131438	-0.331959587725936	0.00136089609186565	0.0156065335447283	5.26443541203149	5.45282234425462	8.1085119704757	7.18133831852652	4.12223717524913	4.52102390556238	5.70812738359701	5.52701394964497
TTLL7	1487.45806721758	-0.380528705577398	0.000670030385738866	0.00897317766345113	3.76913082184262	3.91292469098682	2.76928211942072	3.46562102036192	2.99237966158535	2.96768833697604	3.2093997234327	2.9569685695753
TUBB	2320.25000178596	-0.440213105367885	0.000182183962117494	0.00312996151187339	0.842676698703095	0.944328448978119	0.585975750261908	0.487439727542064	0.611176336750263	0.712080026114373	0.586797262730241	0.492281643952794
TUBB6	20239.3621413786	-0.369559316546394	0.000622054884876412	0.00842105266735552	62.2687449512919	52.6885067313841	52.0327182541823	40.2564888151283	40.8100941016185	49.0008122450112	54.9855386820958	57.5882987905153
TVP23B	1707.45011222681	-0.383231296953164	0.00148006135855233	0.0167216479578994	4.59294148706787	4.98987081744189	1.77101567447431	1.62360765177711	3.40470397897109	3.99133810591654	1.50912633196796	1.50145252354685
TXNDC15	3844.37901503981	-0.45949705704372	3.97634786933545e-06	0.000128734262269735	10.1295462201824	9.96147308583428	9.68459237278031	9.54863123034887	7.0192638457363	7.74565459887486	8.54291517754085	8.17672890486442
TYMS	613.465800464742	-0.590844340903497	0.000178068787903499	0.00306309555332247	3.76305217497544	4.14194695052551	4.34833441666527	3.49706910267575	2.12106181167959	2.91290473112044	3.52762511583598	3.0936041270322
UAP1	7072.40105500824	-0.503148893697927	1.94093148386446e-05	0.000487077997788071	25.4222080747072	26.5582495043595	28.803075431752	21.2369343941456	15.9023213643165	20.743903795692	26.980427251852	26.6622832386188
UBASH3B	2725.78090412049	-0.475421242312779	2.20543753225354e-06	7.68376675260007e-05	3.80881228963846	3.84042418048178	3.3563676192073	3.38537749314984	2.72004703018527	2.83653307527194	3.21931889678794	3.03519760397343
UBE2C	669.261187689546	-0.535620878785449	0.000573960192715179	0.0079342916066478	5.61118194604765	5.05592526716137	3.40897833207908	2.2502021854264	2.96186880942449	4.14025392559503	3.14403950971769	2.8331982746244
UBE2E1	2711.79569443115	-0.425673761846617	6.40367342892054e-05	0.00132384375239145	13.3264935052539	13.4897506674281	10.8918419635942	9.29174632791041	9.47130252276001	10.6839674968771	9.4704326150087	9.60626930357943
UBE2T	384.575536129563	-0.480854214313225	0.00551884110547567	0.0456631545031874	4.25599967981648	4.12267481305451	3.43979237155769	2.01117197829957	2.33282610045633	3.38117577722491	3.13234080729577	2.51795851200645
UBE3C	6669.13248209555	-0.335942331813886	0.00021396015429349	0.00355572764889435	12.0310833978761	11.8188119018213	4.16653557796246	3.91118548542135	9.3790685772232	9.85641703457259	4.40370016735145	4.01973186154202
UGP2	4298.56796373949	-0.417423638960213	3.80189190920282e-05	0.000874180405990403	16.2589008066924	17.2959488258799	17.4621733880308	14.4728359961931	12.1396695362081	13.295858172277	14.2349642163527	13.4935866152081
USP1	1628.1059074923	-0.33246634568185	0.00308674862912027	0.0295892447150377	3.48210621302665	3.70981809761665	4.22160287710182	3.7138173358214	2.83069639391437	2.95411080993089	3.80422573551068	3.54851785109705
USP13	1853.77115722574	-0.448780057164442	4.82937338486171e-05	0.00105561796901269	2.20994329791666	2.28662160310599	1.27231162930678	1.38878607365596	1.58864968222076	1.72933598601423	1.17416469471957	1.19542592392381
USP31	1335.50910691343	-0.374754210906474	0.000928672772608602	0.0115261221967435	1.19106407970608	1.15857258907899	1.11601518747267	0.871121071228289	0.905411998615697	0.922737159090906	0.972957735753856	0.93161465538349
VAT1L	4788.69582198837	-0.413096448349099	8.61471710357002e-05	0.00170395132104763	11.6941686395741	12.3277873069865	22.4627006528733	18.3071902089268	9.90582149795248	8.33555025812673	17.4758658509043	18.0868036053262
VCAN	6987.73956150712	-0.799068521103616	4.22438591824156e-14	7.24851818746273e-12	5.89635521326283	6.0666009910141	4.85263582277997	6.05659760778939	3.10618965470555	3.71693534879591	3.30069381967517	3.30996826441265
VEPH1	2457.22061168924	-0.474448417183969	0.000212078942776581	0.00353301898967734	4.36577532493219	5.01156845680272	3.28661093240341	2.9768527232445	2.94954997424082	3.77455346043053	3.57901890892326	3.26282810815931
VNN1	256.388533182726	-0.945891596117637	9.17972479116671e-08	4.63272361060094e-06	0.74238549476224	0.789357092197741	0.648149448901212	0.478731080316844	0.356233204465105	0.335282166805677	0.252989555760068	0.263403769287015
VOPP1	2852.81339124339	-0.59056768911665	5.40795361499951e-07	2.20937438312793e-05	7.18691852953644	7.21685292914429	5.53428441543944	3.94247377336113	4.21761508740405	5.29316027342786	5.27981221577574	4.82140097344051
WDHD1	846.768491647948	-0.517528563918039	0.000327579725254951	0.00503548363782163	1.35312773056892	1.43036038606772	1.08235837925937	0.822913029437909	0.825979073986506	1.0809844230822	1.00511917969874	0.97204489235776
WDR54	686.526513967809	-0.441061199671072	0.00183622262050323	0.0196613322243743	6.09444428674535	5.11809065249968	4.21327632339069	3.26895340094728	3.83240252225261	4.31096141515647	3.73158928703672	3.66850493997417
WDR76	665.123831189859	-0.667883947393957	1.11177875251509e-05	0.000298657278586587	1.67003314464577	1.77069241536108	1.33900141524157	0.816994885863411	0.887574581096392	1.18535501034777	1.17916448293077	1.02381231837673
WEE1	1615.08595163594	-0.440441932814451	0.000464702971790524	0.00670765267483546	3.69585779067738	3.98515044938701	3.99265877559209	3.07906662377514	2.53677663328496	3.12330823113995	3.69460396089786	3.34569508661944
WIPF1	1157.02431722941	-0.361406465401413	0.00225227334174091	0.0230208162040785	2.30654323224482	2.30050680292033	2.14441544717614	1.96662542204236	1.88034219883099	1.73265890715485	2.04978564849272	1.9174916468273
WLS	9334.65697515856	-0.414135674244995	2.80360967425255e-06	9.45581081043362e-05	28.368597586857	28.9438180469535	23.8224673089102	22.5108813405498	22.3735264856033	21.3545505459719	19.96856753585	19.6264684211591
WNT5A	10779.6230322753	-0.386736905648659	2.83936471540073e-05	0.000675493231339788	15.6357814825293	16.8482397932509	12.1172269200339	13.9631125630979	12.9445452102106	12.3184165385782	9.79718385571921	9.16001635454244
WSB2	3611.86609340461	-0.560516416893684	1.38406260908772e-08	8.67535499312656e-07	12.4498337136311	11.8082100627237	16.5542680332566	13.5624212339653	7.95089402979727	8.60474719792505	12.1499858622025	11.7349172806434
WWP1	1226.11606671244	-0.372553148408996	0.00180336810258916	0.0194105201755126	2.68836844467675	2.92935880504687	2.81097143871216	3.19261212295472	2.19938979073863	2.17449550593758	2.60779731263218	2.53749678187009
XIRP1	64.6012799783099	-0.665556876513657	0.00238918441427411	0.0240795407156687	0.12352926487355	0.110244228984187	0.524867703626108	0.513820109566028	0.0478891962210669	0.0517084066646444	0.318623892545604	0.346149477315425
XKR8	331.893644579286	-0.906686869969914	6.85773459493396e-08	3.56576222669161e-06	1.47150680496059	1.31092482911391	1.75307410431839	1.57856865794122	0.615011487739918	0.716368331788583	0.725327376404093	0.685872012134382
XYLT1	908.162737523797	-0.822530650644685	1.23821954825911e-08	7.86899987914479e-07	1.10297502292268	1.00964906732732	0.433418196066023	0.565401636360767	0.483116891138206	0.651386351154474	0.414221790014732	0.369309784348427
YPEL5	3880.77425103245	-0.350534699986086	0.000386343936967759	0.00576450350299612	13.5201600338521	14.094916349775	15.340339018823	14.8594668966934	10.6572721576216	11.3453195177265	14.1645602896182	13.3215873626334
YWHAH	4589.15825671603	-0.442765184026522	6.74162023883212e-06	0.000197953644551126	24.0353105648218	25.0239233270691	29.9466043407	24.291365456948	17.539805396136	18.9978572983382	23.6275383812801	22.3337061097508
ZBED6	4330.18245831859	-0.345021296691178	0.000312709497987002	0.00485584081319861	11.2710102096748	11.4013442942659	5.17149296422583	5.40886627976721	8.81307171341747	9.3343982417877	4.5735367263517	5.12087576703602
ZBTB18	588.074796765152	-0.460187709695906	0.00124135627766241	0.0144898789315237	1.27737057407598	1.25935616880726	1.45810494835642	1.21403754878782	0.856755221430051	0.962085583670015	1.06349468902262	0.949797855749183
ZBTB2	802.437112992862	-0.384457974448128	0.00283846079744177	0.0276729768227863	2.34072630015183	2.34245197762702	2.7217382496271	2.16273849100291	1.76241468587866	1.83049945609681	2.10315602699899	2.11753424023955
ZC3H12C	1910.31157661871	-0.348170146938898	0.00138470844863045	0.0158531216633447	1.9611729529634	2.07992150895467	2.10934851998961	2.12079638076954	1.5750589158144	1.64118652998276	1.80558207156876	1.65989896102304
ZC3HAV1L	740.821216735939	-0.567897863995881	2.51623187151508e-05	0.000608104135568443	4.32022816026937	4.17300295965996	4.12894524784353	3.5274256943019	2.64797478020993	2.98441151787269	3.33721979420595	3.16355971163802
ZCCHC3	699.152789285661	-0.367284322095891	0.00583540367066021	0.0477654061938895	2.48275676094685	2.301639852105	3.08047779347623	3.06184478902157	1.86888239629158	1.83526663194439	2.03649652838376	2.1003188034661
ZDHHC16	1257.5232236013	-0.360451078117919	0.00233593451091395	0.0237169918870679	5.92253306434761	5.43185706970606	3.96698693362135	3.80122700542295	4.69623018647708	4.2017157608499	4.35244482074827	4.04898861438905
ZDHHC2	4650.79892768047	-0.412524024853924	6.116390811128e-05	0.00127598323198107	10.7938313675221	11.2343916241681	9.75028822632564	7.09678491648651	7.83098830425567	8.91150310412805	10.226071789797	8.81494199160744
ZFHX3	1939.74203632786	-0.484193244924856	1.21371910659146e-05	0.000323509168469532	1.23429940254342	1.1031877975754	1.14731280099457	1.44128359236746	0.802456080667609	0.873907526901569	1.04885122929295	1.12316028942759
ZHX3	4810.66315566358	-0.489839727672814	7.48661237758798e-06	0.000215810989336206	4.71389455181263	4.67173207521548	4.91192165688794	4.86952307932234	3.02692194274324	3.68649228499542	4.61741389705329	4.60153016620227
ZNF175	1090.32161985159	-0.91880015930785	1.96003381600002e-14	3.73685891558781e-12	2.55478357449981	2.62513719761366	2.65376426441486	2.34185161050497	1.34504286400081	1.32206152300364	1.7142109266296	1.64588623669491
ZNF367	230.628238011969	-0.557808402460111	0.00329016873167589	0.0310833765861768	0.660353514502822	0.62719893428209	0.645992247881946	0.267351584130071	0.323921514228679	0.469348072422487	0.554119395200776	0.425455827118975
ZNF609	2173.12435594055	-0.429504541125574	3.87083465046865e-05	0.000885582454116387	2.37032869092719	2.44882195231962	2.05983148742507	2.36179954898861	1.78935172350936	1.82694144351389	1.83745885701965	1.88542532874061
ZNF697	1009.53779891194	-0.447505603811971	0.000282371120250204	0.00447071322684493	1.8620504722269	1.97109302872968	2.44330065474423	2.68233614531517	1.43917168676971	1.37376905594335	1.62121857766117	1.62188319049253
ZNF805	1443.35391678671	-0.476141670896354	2.29551691110397e-05	0.000562688582834361	1.38743151581935	1.38101056348814	1.41881945908217	1.26795594602651	0.975657717996105	1.02294404897046	1.0879428466135	0.979665114730725
ZNF808	688.030907409186	-0.466077973992977	0.000771342980394755	0.00995133937206654	2.05305532609183	1.77454774512326	2.09121236802138	2.08221380284785	1.30742214082685	1.42563380129685	1.69316540621262	1.76336483653655
ZWINT	635.588985171151	-0.669547888743104	5.46201771909245e-05	0.00116725155843178	3.6332919899992	3.58501209027149	2.7264311602622	1.6204612836263	1.65513444689751	2.58915090501196	2.35192898851885	1.71254908563016
