# Supplementary material for: Integrated analysis of H2A.Z isoforms function reveals a complex interplay in gene regulation
Source: eLife. 2020 Feb 28;9:e53375. doi: 10.7554/eLife.53375 (PMC7048395; doi:10.7554/eLife.53375)
Supplement: Supplementary file 5. [file elife-53375-supp5.xlsx]

## Sheet: Feuil1
Table S5- Genes regulated upon the combined depletion of H2A.Z.1 and H2A.Z.2 in WI38 cells
Gene name	baseMean	log2 Fold Change	pvalue	padj	si.Ctrl.n1 (RPKM)	si.Ctrl.n2 (RPKM)	si.Z1.n1 (RPKM)	si.Z1.n2 (RPKM)	si.Z2.n1 (RPKM)	si.Z2.n2 (RPKM)	si.Z1_2.n1 (RPKM)	si.Z1_2.n2 (RPKM)
A4GALT	557.078	0.613114	0.000282695	0.00180431	1.6886	1.26127	1.97848	1.78809	2.38726	1.78767	2.17074	2.35914
ABAT	114.975	1.08657	0.000298061	0.00188311	0.0959107	0.0923257	0.111938	0.159757	0.151338	0.144893	0.208838	0.195298
ABCE1	4384.37	-0.33103	0.000259291	0.0016759	8.57201	9.07342	7.74879	6.51097	7.81582	9.09159	7.36209	6.83714
ACADS	367.515	0.561115	0.00451652	0.0197987	1.25264	0.916589	1.44652	1.079	1.73858	1.3952	1.5035	1.70598
ACBD7	45.6741	-1.30515	0.00576751	0.0243398	0.133238	0.158546	0.102533	0.0484993	0.0895322	0.155809	0.0631254	0.0569485
ACCS	442.404	0.565552	0.00201632	0.00989267	1.39322	1.01751	1.56387	1.44896	1.58777	1.60384	1.73438	1.84512
ACKR3	23.3501	1.87023	0.00580772	0.0244874	0.0380117	0.0345519	0.0692801	0.172955	0.13631	0.0909224	0.144716	0.122902
ACOT7	929.4	-0.417917	0.000920673	0.00504644	3.60029	3.15594	2.78995	2.94563	3.06351	3.40074	2.59508	2.50695
ACSL4	8111.06	-0.381042	6.99113e-06	6.42854e-05	12.8143	13.1728	12.0005	10.8857	10.3462	11.7502	10.5849	9.60454
ACTL6A	1372.05	-0.339945	0.00505146	0.0218031	5.88635	6.04715	5.48571	4.65361	4.86612	5.31307	5.1887	4.35973
ACTR3	16320.3	-0.370131	1.31199e-05	0.000114774	22.9796	24.4301	21.0217	18.6152	19.6537	20.8112	19.4571	17.6614
ACYP2	275.023	0.582418	0.0048577	0.0211163	0.531935	0.429165	0.672398	0.631541	0.59648	0.473375	0.696827	0.749221
ADAMTSL1	782.39	-0.44079	0.00090192	0.00495914	0.894732	0.815048	1.08375	0.726396	0.569885	0.731893	0.662271	0.60997
ADAT1	862.506	-0.498088	0.00014548	0.00099921	1.31467	1.25549	1.09733	1.01398	1.10503	1.24183	0.981898	0.858604
ADCK2	892.292	0.377703	0.00258508	0.0122258	2.6127	2.37176	3.55797	2.55171	2.32357	2.43517	3.23958	3.29491
ADPRHL2	1577.39	0.36669	0.000485197	0.00288976	6.47896	5.89023	9.43716	6.66915	5.94306	5.28436	8.05587	8.04233
AGO1	2307.34	-0.346343	0.000243351	0.00158602	2.58262	2.57749	2.03239	2.25847	2.61214	2.62576	2.02656	2.07744
AGPAT2	1004.99	0.488397	0.00383951	0.0171744	4.96326	3.27257	5.58621	4.76688	6.29215	4.4589	5.40371	6.19457
AHCYL1	4117.59	-0.334084	0.000102573	0.000732469	6.90512	7.10215	5.95768	6.33368	6.84574	6.9526	5.7089	5.53349
AHNAK2	16592	0.463414	1.21995e-06	1.31677e-05	6.40074	5.16625	6.35076	5.07405	5.93088	6.92051	7.89292	8.1981
AKAP11	4955.48	-0.362913	3.03759e-05	0.000244681	4.13607	4.37868	3.55654	3.92161	3.76452	3.91787	3.41202	3.28889
ALG10	262.924	-0.673271	0.00368922	0.0165867	0.733917	0.829018	0.732792	0.673679	0.492345	0.702199	0.587981	0.408454
AMER1	370.782	-0.446014	0.0105022	0.0396893	0.386454	0.381261	0.259554	0.32013	0.352784	0.353922	0.294257	0.275905
AMH	40.7085	1.70626	0.00239631	0.0114566	0.102312	0.0569565	0.19138	0.178042	0.192056	0.0772816	0.180407	0.33214
ANKRD28	5243.14	-0.444847	2.07583e-07	2.58686e-06	6.86756	6.96988	5.50031	6.62988	6.83093	8.11504	5.35194	4.93262
ANKRD33B	2954.65	0.391471	1.50657e-05	0.000130173	2.0495	2.10052	2.05574	1.95749	2.23814	2.28417	2.75233	2.75547
ANP32A	1954.14	-0.364701	0.000243687	0.00158673	6.73298	6.7862	5.78177	5.73308	6.16473	6.62782	5.4625	5.1606
ANP32E	1860.89	-0.572643	2.90383e-06	2.88983e-05	4.48465	5.00247	3.98188	3.87822	3.54472	4.31772	3.5367	2.92965
ANXA3	1778.71	0.593528	1.90525e-08	2.81713e-07	6.38893	6.87758	10.4587	7.3685	6.11078	6.90347	10.1098	10.168
AOX1	10124.2	0.566239	3.39677e-12	8.26058e-11	12.4579	12.6202	16.6672	12.1523	8.77943	11.8905	19.6031	17.9578
AP1M2	50.8773	1.27479	0.00476625	0.0207702	0.124939	0.1314	0.17596	0.175711	0.202549	0.309716	0.285396	0.342755
AP1S3	260.32	1.00224	1.21208e-06	1.31093e-05	0.34322	0.308512	0.522044	0.376748	0.358012	0.512662	0.671205	0.64524
APLN	2410.91	0.36724	7.2545e-05	0.000535482	5.0757	4.83059	6.08363	3.17411	4.03143	4.51284	6.49707	6.41459
APOLD1	295.168	-0.782989	5.13265e-05	0.000393559	0.597651	0.575551	0.463602	0.390807	0.331908	0.464976	0.359016	0.330547
APRT	2366.81	0.386352	0.00223892	0.0108296	22.1694	16.503	25.3185	22.0196	25.1173	22.3825	24.4403	26.4466
ARHGAP23	419.572	0.617732	0.00143148	0.00737391	0.250888	0.176467	0.267894	0.308001	0.222035	0.233579	0.350549	0.307583
ARHGAP26	249.803	0.611747	0.00470855	0.0205682	0.177687	0.154674	0.218248	0.2628	0.206227	0.204854	0.234457	0.276687
ARHGAP39	118.639	1.03471	0.00140092	0.0072271	0.14011	0.086365	0.18117	0.231455	0.22314	0.12862	0.211925	0.249894
ARHGAP42	776.936	-0.550257	0.000186612	0.00125169	1.38584	1.55607	1.08496	1.1968	1.52548	1.38622	0.93531	1.09879
ARHGEF2	6092.81	0.331717	4.70754e-05	0.000365153	9.42464	9.63078	11.7482	12.2444	11.1838	11.0775	11.9745	12.281
ARMC9	2184.42	-0.39064	6.24203e-05	0.000470146	2.58894	2.69439	2.74569	3.48411	2.64524	2.17481	2.05147	2.02715
ARMCX5	304.763	-0.492748	0.00908038	0.0350815	0.893706	0.878638	0.677203	0.637517	0.908683	0.770513	0.63064	0.642674
ARPP19	10299.5	0.334615	4.93265e-05	0.000380311	10.8182	11.1548	14.7908	12.6348	11.6189	11.7638	14.6232	13.4105
ASAP2	5220.29	-0.419206	3.11878e-07	3.76615e-06	7.94825	7.89084	6.17759	6.47326	7.43337	7.42774	6.1424	5.83645
ASTN2	195.296	0.683689	0.00470965	0.0205682	0.16246	0.125715	0.184775	0.245254	0.214821	0.215687	0.243568	0.221345
ATP6V0E2	669.445	0.498855	0.000697748	0.00398324	1.60661	1.40356	2.33412	1.76135	1.12415	1.54399	2.00993	2.27524
B4GALNT1	118.703	-0.815375	0.00545655	0.0232654	0.29559	0.29566	0.23892	0.250277	0.19132	0.181985	0.160485	0.178998
B4GALT4	2657.36	0.420148	2.3203e-05	0.000191296	7.00679	7.67408	7.44045	6.80236	8.79598	8.47161	10.0772	9.82224
BATF2	253.771	0.822211	0.000136509	0.000944993	0.668327	0.523425	1.0474	0.384796	0.901051	0.631298	1.08583	1.0305
BAZ2A	2814.64	-0.345861	0.000441032	0.00265603	2.60668	2.61802	1.99149	2.46349	2.53228	2.52431	1.96319	2.19218
BCAM	1045.61	0.687182	5.1172e-05	0.000393234	2.1608	1.39962	2.41438	1.94518	2.73517	2.37906	2.70156	3.0514
BCCIP	1391.78	-0.324165	0.00363265	0.0163744	3.37237	3.57681	3.13255	2.94865	3.05515	3.14454	2.76829	2.85078
BCL2A1	26.1712	-1.98403	0.00190909	0.00941594	0.306855	0.36374	0.163925	0.086661	0.188695	0.394833	0.0805683	0.0912317
BCL2L1	3559.13	0.365369	4.14144e-05	0.000324652	7.38579	6.63349	8.17508	7.77528	6.32381	6.68393	9.12027	9.11127
BCL2L2	2129.44	-0.327799	0.00091014	0.00499651	4.84447	4.97516	4.24324	4.37955	3.81326	4.41587	3.86318	4.05065
BCL7A	465.02	-0.519699	0.00141419	0.00729287	1.18165	1.0183	0.949443	0.854489	0.87938	0.890837	0.759157	0.787209
BHLHB9	458.852	0.445098	0.00581852	0.0245181	0.713219	0.664096	0.981307	0.00989815	0.840335	0.771598	0.986746	0.907417
BIRC2	5450.29	-0.328506	0.000450253	0.00270576	10.2565	11.2902	9.12926	8.30874	9.19854	9.0253	9.01735	8.35721
BOLA3-AS1	137.657	-0.688785	0.0132283	0.0478894	0.285768	0.327453	0.197486	0.195039	0.236342	0.266583	0.204899	0.181634
BORCS7	528.062	-0.432602	0.00746665	0.0300292	1.91776	1.85834	2.04266	1.71907	1.41703	1.43889	1.56008	1.27192
BRI3	3044.66	0.343798	0.000354335	0.00219709	19.2856	17.2118	23.254	19.1312	21.0535	22.3444	24.4267	22.344
BRPF3	857.243	-0.49416	0.000125189	0.000873957	1.34355	1.18389	0.95414	1.06737	1.21513	1.24745	0.906968	0.903177
C10orf54	3118.8	0.560591	7.18572e-08	9.63958e-07	NA	NA	NA	NA	NA	NA	NA	NA
C11orf65	30.5612	1.58725	0.00901651	0.0349116	0.0566221	0.0873404	0.223599	0.198473	0.131706	0.120389	0.177245	0.267049
C14orf28	630.088	0.440648	0.00202533	0.00992994	1.35971	1.42549	1.84927	1.55918	1.29652	1.38636	1.95561	1.87421
C15orf48	138.178	0.863467	0.00177795	0.00888695	0.837614	0.726767	1.29764	0.720949	0.454611	0.370654	1.37123	1.493
C19orf24	385.927	0.592745	0.0015471	0.00788553	2.9767	2.26263	3.93184	3.3818	3.1724	2.74139	3.82002	4.11117
C19orf66	1838.41	0.436936	6.14199e-05	0.000463357	6.03826	5.07929	7.54699	4.98309	6.52258	5.18258	7.55133	7.619
C1orf115	96.6834	1.04992	0.0019493	0.00961049	0.181297	0.142046	0.177455	0.0977674	0.273329	0.250557	0.296541	0.374089
C1orf54	478.549	-0.390662	0.0135588	0.0488339	6.06244	6.39639	5.91046	5.53522	5.21628	5.43881	4.81181	4.81295
C1QTNF9B-AS1	110.329	-0.911338	0.00310355	0.0143018	NA	NA	NA	NA	NA	NA	NA	NA
C21orf2	322.68	0.599977	0.011269	0.0419656	0.881783	0.521566	0.959728	0.881483	1.02692	0.686553	0.984017	1.14125
C6orf1	616.757	0.566363	0.000379767	0.00233496	NA	NA	NA	NA	NA	NA	NA	NA
C9orf69	1133.14	0.511224	0.000386648	0.00236816	NA	NA	NA	NA	NA	NA	NA	NA
CACFD1	219.842	0.693054	0.00559185	0.0237341	0.543944	0.348137	0.675662	0.584324	0.816631	0.573474	0.696446	0.744503
CALM2	42373.4	-0.39126	3.24217e-05	0.000258783	72.1217	77.9244	63.9639	57.6023	63.4345	67.3136	62.6023	53.181
CAMK1D	150.255	0.777798	0.003168	0.0145367	0.101289	0.0885357	0.115893	0.191858	0.104712	0.104449	0.162818	0.16496
CANX	37418.1	-0.339434	2.17463e-05	0.00018088	62.2672	65.6883	51.9386	52.2105	70.846	66.8299	53.1095	49.203
CCDC148	55.2665	1.19158	0.0058072	0.0244874	0.0971347	0.0752848	0.16788	0.195075	0.116866	0.0993462	0.20148	0.193269
CCDC170	82.504	1.26586	0.000389842	0.0023846	0.0774373	0.0624293	0.0895016	0.176458	0.183052	0.124689	0.169698	0.167856
CCDC34	127.669	-0.733146	0.00950391	0.0364867	0.396682	0.423614	0.333689	0.322932	0.30231	0.444417	0.250413	0.249601
CCDC47	3612.47	-0.350445	9.54682e-05	0.000686276	8.84865	9.09665	7.56909	7.20339	8.85885	8.79293	7.36204	6.88105
CCDC51	331.755	0.599376	0.00187978	0.00929427	1.17253	1.15502	1.82495	1.4174	1.69672	1.60503	1.61764	1.94415
CCDC57	977.483	-0.373791	0.00309387	0.0142713	1.18465	1.05774	1.0528	1.18824	0.985832	1.05167	0.832878	0.912373
CCNE2	196.305	-0.686357	0.00317011	0.0145417	0.64788	0.696892	0.593748	0.2476	0.280966	0.581356	0.431998	0.41513
CCNH	944.489	-0.421206	0.00105605	0.00567976	4.75146	5.2432	4.19123	4.07258	3.56125	4.2547	3.71994	3.84221
CCP110	1071.42	-0.36731	0.0024282	0.0115854	1.51689	1.51566	1.26476	1.26347	1.3916	1.4276	1.25703	1.12235
CD44	62484.3	-0.407819	2.04132e-07	2.55065e-06	77.9195	83.7465	57.664	76.9256	85.083	73.0195	61.5896	61.6879
CD81	16315.3	0.364509	6.99662e-06	6.42938e-05	68.907	60.1252	83.8151	76.0052	71.671	64.3075	84.556	83.184
CD99L2	4861.03	0.336155	3.26838e-05	0.000260579	8.88568	8.51616	10.6275	10.1041	9.40155	9.10073	11.1499	11.0515
CDC42EP1	1896.67	0.464076	0.000685224	0.00392772	6.56744	4.65584	7.33918	7.0698	7.90826	6.33218	7.66788	7.90647
CDCA8	531.9	-0.594074	7.82485e-05	0.000573359	2.02692	1.87859	1.7118	0.972785	1.14211	1.84332	1.30803	1.30439
CDH2	1826.16	-0.399845	0.000189141	0.00126684	3.37161	3.69605	2.80288	3.88352	3.11824	3.12509	2.72598	2.70005
CDH6	1158.72	-0.3312	0.00445153	0.0195628	1.20841	1.07822	1.08955	1.60288	1.10844	1.50259	0.933411	0.901059
CDR2L	666.293	-0.631407	2.42852e-05	0.00019893	1.8979	1.58512	1.35893	1.33988	1.55475	1.52674	1.07093	1.19319
CENPH	216.094	-0.718244	0.00126385	0.00661976	1.41518	1.51491	1.198	0.664613	0.980291	1.38151	0.918931	0.886185
CEP290	2297.77	-0.346389	0.000231904	0.00152202	2.46347	2.43867	2.00492	2.09226	2.40021	2.62823	1.92829	1.96995
CEP57	1660.83	-0.346367	0.000964413	0.00525744	4.30773	4.43642	3.69704	3.46917	4.42532	5.03713	3.40029	3.55743
CEP78	818.997	-0.505907	0.000282849	0.00180431	1.81301	2.00102	1.33272	2.08712	1.51119	1.59198	1.45219	1.27185
CFAP36	712.681	-0.412881	0.00223033	0.0107992	4.65355	4.27828	3.54384	3.74892	4.7493	4.70094	3.34558	3.42614
CHAC1	1433.81	-0.338362	0.00661254	0.0272103	7.10715	6.04689	4.65716	6.57234	10.0713	7.32149	4.84454	5.6407
CHM	1758.03	-0.508283	4.22824e-06	4.04711e-05	1.89181	2.00842	1.61512	1.53167	1.54691	1.65882	1.47081	1.30672
CHORDC1	1239.64	-0.578404	6.48736e-06	6.02453e-05	3.19334	3.45018	2.74886	2.58755	3.32185	3.15689	2.45844	2.05144
CLCF1	159.864	-0.713724	0.00587194	0.0247062	0.824342	0.705431	0.502351	0.469425	0.709735	0.667747	0.438989	0.499773
CLDN1	1117.45	-0.699718	1.00845e-09	1.81418e-08	3.09575	2.98094	2.99764	2.08065	2.6625	2.1627	1.8928	1.88834
CLDN4	16.9276	2.65462	0.00281145	0.0131457	0.0163486	0.0216153	0.0844245	0.0214895	0.0338023	0.015642	0.0746896	0.169873
CLIP3	658.931	-0.454838	0.00115262	0.00611696	1.61992	1.56543	0.872208	1.44495	1.79765	1.64728	1.13084	1.21667
CLU	19404.6	0.454406	1.87056e-09	3.26465e-08	38.5861	36.5961	47.249	44.7134	45.4095	44.4074	53.9583	50.1635
CLVS1	28.5124	-3.87744	5.03353e-07	5.86632e-06	0.0914371	0.139784	0.0338514	0	0.0509563	0.0246053	0.00435143	0.0113708
COA1	1353.83	-0.34871	0.00320216	0.0146647	1.80737	2.03217	1.56189	1.49286	1.69766	1.93045	1.51469	1.54072
COL4A1	33198.1	-0.448715	1.27925e-09	2.28087e-08	39.1975	38.7414	23.0497	34.9737	50.2509	39.5514	29.8879	27.8527
COPG2IT1	276.991	0.563946	0.00430749	0.0189833	0.494996	0.487975	0.52759	0.747239	0.359106	0.42929	0.736175	0.733392
CORIN	327.278	0.570172	0.00197105	0.00970789	0.382618	0.368251	0.398247	0.251468	0.309751	0.35711	0.578388	0.548581
CORO1B	2611.35	0.397357	0.00400498	0.0177898	10.2503	7.08292	11.6799	10.501	12.3456	10.3669	11.0566	11.9147
CPTP	564.561	0.498622	0.00848097	0.0332602	1.94284	1.31144	2.51271	1.73073	2.30366	1.71956	2.09601	2.51374
CRHBP	48.8109	2.02679	2.56366e-05	0.000209026	0.0922891	0.0681879	0.128628	0.0477556	0.0799747	0.0727181	0.310021	0.342052
CRK	132.227	0.86769	0.0115099	0.0426592	0.161362	0.0761947	0.195065	0.19379	0.197881	0.133908	0.200597	0.22933
CROCC	592.525	0.53735	0.00953878	0.0365805	0.692589	0.416232	0.643451	0.692106	1.00077	0.694212	0.723689	0.887876
CRY2	1238.23	0.35707	0.0016221	0.00821414	1.98739	1.78649	2.02969	2.12868	2.26002	2.18563	2.4473	2.43016
CRYBB2P1	554.65	0.477107	0.00238457	0.0114121	2.56598	2.13138	2.87148	2.7061	2.3761	2.53777	3.44701	3.13916
CTAGE1	27.7271	1.51919	0.0127074	0.0462784	0.027749	0.0229303	0.0463607	0.0967987	0.0340657	0.0243373	0.0721903	0.0736164
CTDSPL	2388.47	-0.353234	0.000384514	0.00235714	4.44366	4.667	4.13115	3.82161	4.12613	4.08232	3.75531	3.46562
CTF1	172.063	0.842877	0.000695024	0.00397103	0.545676	0.574796	0.814218	0.916745	0.483531	0.522093	0.986226	1.04994
CXCR4	33.9815	3.48836	3.05324e-07	3.69019e-06	0.00995319	0.0296092	0.117914	0.0573642	0.0733135	0.0571382	0.234938	0.244248
CXorf56	755.424	-0.475421	0.000306846	0.00193166	2.73956	2.73557	2.30969	2.10116	2.18454	2.53876	1.96107	2.02097
CYB5B	2977.92	-0.346732	0.000383035	0.00235013	5.63624	6.14381	5.4906	4.51112	4.79786	5.41048	4.7968	4.58429
CYBA	370.326	0.601734	0.00704902	0.0286535	3.86426	2.35386	4.08746	3.52489	5.54289	3.60483	4.39252	5.04344
CYBRD1	19138.4	0.381831	8.55888e-07	9.56958e-06	27.9305	29.2802	30.0594	29.1203	35.4452	31.8351	38.4108	37.0038
CYFIP2	324.102	0.53173	0.00412043	0.0182563	0.289856	0.299039	0.220121	0.259331	0.33938	0.312346	0.428033	0.434002
CYS1	38.4699	1.62509	0.00272779	0.0127972	0.0623859	0.0436679	0.093639	0.0701298	0.108123	0.122891	0.195598	0.131431
DAPK3	2704.51	0.441467	0.000518967	0.0030623	8.63471	6.46778	9.48665	9.31337	8.84506	7.34818	9.6598	10.9896
DARS2	1075.08	-0.419295	0.000402037	0.00245171	2.78063	2.78785	2.52855	2.08019	2.28536	2.56636	2.18987	2.02408
DBNDD1	397.092	0.431045	0.0114933	0.0426201	0.9406	0.865428	1.1834	0.758009	1.03407	0.997332	1.19723	1.25931
DCAF13	2089.09	-0.356813	0.000227267	0.00149368	6.70998	6.75363	5.60868	5.2936	6.49737	6.93692	5.41124	5.22458
DDX58	4632.65	0.747024	2.40991e-11	5.3676e-10	6.27301	4.78494	9.79277	4.87545	6.30339	5.24916	9.56089	9.14331
DDX60L	7945.6	0.471271	1.3601e-07	1.74451e-06	7.52817	6.48745	8.84845	4.64225	7.62495	7.63033	10.1867	9.42989
DET1	433.237	0.431044	0.00819453	0.032363	0.7696	0.729583	0.930244	0.925685	0.801828	0.948549	1.01532	1.02617
DGCR11	146.297	-0.741146	0.00638477	0.0264437	0.576872	0.673333	0.464097	0.47301	0.447277	0.620933	0.401499	0.358689
DHRS3	965.799	0.745743	4.28087e-08	5.98298e-07	2.86957	2.27394	3.05798	3.84896	4.00414	3.16589	4.24896	4.42633
DHX58	717.392	0.546073	0.00105443	0.00567324	1.99562	1.4025	2.83396	1.42366	2.5029	2.2708	2.62066	2.36368
DKC1	1477.69	-0.385134	0.000462364	0.00277261	2.82819	2.78114	2.38835	2.2431	2.55546	2.87482	2.28952	2.05572
DLG4	544.694	-0.593325	6.4564e-05	0.000484471	0.996426	0.967854	0.728232	0.940274	0.97758	0.996784	0.668564	0.647778
DLL4	640.402	-0.498543	0.00219712	0.0106664	1.91684	1.41955	1.7734	2.40544	1.9477	1.32595	1.17296	1.20165
DNAL1	649.287	-0.350584	0.0126084	0.0460132	0.635709	0.651161	0.569772	0.631831	0.694209	0.644997	0.498232	0.522783
DNM1L	3547.65	-0.361996	2.34937e-05	0.000193125	6.52198	6.47581	5.94543	5.26001	5.2297	5.97345	5.14886	5.07782
DNM3OS	682.194	-0.622298	0.000211729	0.00139943	0.736098	0.836452	0.713088	0.756964	0.609625	0.689888	0.593905	0.443294
DYNLL2	1210.77	-0.329549	0.00393659	0.0175248	6.58212	6.83898	5.72346	5.46678	5.77442	6.61129	5.52598	5.28729
DYRK1A	3095.32	-0.325181	0.000488733	0.00290393	3.65858	3.88752	3.38538	3.06263	3.73112	3.88864	3.032	3.06424
DYRK4	636.025	0.379009	0.00669416	0.0274956	1.55052	1.51461	1.79201	2.00195	1.65762	1.75229	2.03899	1.99139
EBI3	21.0726	1.9903	0.00555016	0.0235928	0.0614305	0.0522133	0.0959685	0.101157	0.163303	0.109155	0.220511	0.232816
EEF1E1	197.867	-0.667569	0.00592976	0.0249083	1.44261	1.50999	1.28544	0.979732	1.26767	1.34193	1.06793	0.818588
EFNA5	648.267	-0.42156	0.00339059	0.015417	1.06794	1.0423	0.794254	1.00645	1.27467	1.29021	0.749078	0.842266
EGLN3	507.414	0.948876	1.59804e-08	2.40083e-07	1.06306	0.872396	1.9108	0.902899	1.19941	0.968013	2.02081	1.74076
EHHADH	408.918	0.439298	0.00853528	0.0334287	0.68312	0.642527	0.645414	0.585078	0.743857	0.869861	0.915995	0.899475
EIF4B	16924.5	-0.344954	5.38269e-05	0.000411159	33.5856	36.9126	29.2545	28.8598	34.3399	37.8378	28.751	27.4259
ELFN1	51.5243	1.69314	0.000716685	0.00407807	0.0613297	0.0387809	0.121499	0.059046	0.0599568	0.0637817	0.11573	0.205148
ELMOD1	427.408	0.78379	2.3441e-06	2.38351e-05	0.77859	0.744639	1.19806	0.769504	0.771918	0.711358	1.37034	1.28039
EME1	143.147	-0.952752	0.000511553	0.00302618	0.627339	0.588453	0.478986	0.235297	0.345086	0.454226	0.3518	0.283941
EMG1	880.863	-0.468858	0.000222583	0.00146564	4.95329	5.13951	4.83381	3.76022	3.76997	4.29142	3.80622	3.57836
EMP2	1380.96	0.375029	0.000720566	0.00409352	1.70096	1.79105	1.83604	1.49682	1.67637	1.82699	2.26544	2.31972
ENTPD5	697.646	-0.452259	0.00144199	0.00741602	0.690844	0.739531	0.577368	0.573714	0.768574	0.683356	0.504667	0.553551
EPB41L4A-AS1	454.323	0.416368	0.00949899	0.0364778	2.50705	2.43631	3.13762	2.98362	3.49892	3.1583	3.25793	3.40867
EPSTI1	1670.05	0.804785	3.28664e-09	5.49679e-08	3.32397	2.38662	4.02482	1.48255	3.59621	2.81517	5.06194	4.9705
ERBB3	116.162	1.7187	2.85643e-08	4.09411e-07	0.0725034	0.0607118	0.121867	0.0830844	0.131169	0.127949	0.225732	0.214787
ERCC5	141.238	0.736962	0.00649257	0.0268031	0.210065	0.184082	0.267114	0.316379	0.274613	0.273435	0.332918	0.328865
ERCC6	1179.48	0.402655	0.000580206	0.0033824	0.699192	0.686507	0.881737	0.792821	0.817006	0.854467	0.88503	0.966151
ERP29	2980.62	0.376029	2.42647e-05	0.00019893	13.7537	12.9819	15.9684	15.3515	17.1443	15.1634	17.3733	17.6775
ESCO1	1043.27	-0.365851	0.0021022	0.0102445	2.00715	1.95293	1.74827	1.62201	2.05665	1.93526	1.50466	1.60039
ESR1	18603.5	-0.463978	3.9678e-08	5.56762e-07	13.6148	14.8547	11.2971	14.7264	13.506	15.7315	10.2296	10.6535
ETFBKMT	205.286	0.798029	0.000488818	0.00290393	0.465169	0.487587	0.775255	0.68136	0.623859	0.741775	0.867932	0.811591
ETV1	744.823	-0.574262	2.30352e-05	0.000190023	0.855674	0.911112	0.972636	1.07508	0.688769	0.784946	0.614731	0.587441
EXD3	264.697	0.575209	0.0105545	0.0398226	0.385168	0.270623	0.404297	0.353565	0.481577	0.351157	0.462182	0.516264
EXPH5	454.371	0.624107	0.000144481	0.00099478	0.270236	0.240677	0.277904	0.255879	0.337572	0.294467	0.382237	0.411357
EYA4	1619.45	-0.412444	0.000109495	0.000774415	2.34001	2.47985	1.88838	2.15703	2.69154	2.65117	1.82489	1.84119
FAAP100	1117.5	0.433836	0.00904888	0.0349983	2.28907	1.47555	2.6034	2.39212	2.26326	1.78089	2.47726	2.6289
FAM117B	640.707	-0.560745	8.86727e-05	0.000642694	0.973091	1.03063	0.735569	1.19643	1.26641	0.917807	0.672505	0.702705
FAM129A	8815.42	0.373326	3.54186e-06	3.45614e-05	8.15256	8.54705	9.03691	8.57764	9.82577	10.7263	10.9096	10.9755
FAM134A	3819.72	-0.769231	5.42676e-19	2.72819e-17	NA	NA	NA	NA	NA	NA	NA	NA
FAM150A	18.0687	2.89527	0.000608613	0.00353479	NA	NA	NA	NA	NA	NA	NA	NA
FAM173B	418.623	-0.441808	0.012991	0.0471156	1.1169	1.34105	1.10367	1.30212	1.16074	1.2521	0.929847	0.908107
FAM180A	1811.06	0.730041	2.55307e-10	4.92097e-09	6.35472	5.1459	8.91631	6.35089	4.49327	6.10659	9.86717	9.35164
FAM199X	2403.51	-0.34942	0.000412077	0.00250423	2.6189	2.74838	2.57801	2.56799	2.29011	2.28341	2.21301	2.05212
FAM207A	388.334	0.562276	0.00807989	0.0320274	2.51917	1.77797	3.0065	2.646	3.13492	2.1444	2.74414	3.61512
FAM20B	4159.91	0.358709	1.81819e-05	0.000154623	4.54953	4.54886	5.64926	5.56501	5.65364	5.93593	5.95497	5.84411
FAM3A	970.411	0.402522	0.0110572	0.0413414	3.88587	2.76885	4.38727	3.73711	4.40815	3.79279	4.09071	4.74628
FAM64A	322.197	-1.19351	4.00306e-10	7.50948e-09	NA	NA	NA	NA	NA	NA	NA	NA
FAM65B	811.325	-0.391956	0.00611229	0.0255641	NA	NA	NA	NA	NA	NA	NA	NA
FAM65C	4066.15	-0.330758	0.000403931	0.00246112	NA	NA	NA	NA	NA	NA	NA	NA
FAM86FP	321.68	0.624056	0.0012591	0.00659735	0.838103	0.948042	0.874084	0.772568	1.17329	1.31865	1.32949	1.46376
FAM86HP	159.264	0.931119	0.000341018	0.00212108	0.367812	0.414605	0.631698	0.530676	0.563053	0.482757	0.739652	0.775622
FBLN5	4197.04	0.37803	1.58492e-05	0.000136105	10.2471	10.755	9.48671	12.1436	13.7864	13.1546	13.7236	13.8966
FBXL12	880.599	0.328356	0.0126843	0.046206	3.15663	2.65531	3.73606	3.31575	3.68639	3.27267	3.64997	3.70104
FBXL20	1311.74	-0.409343	0.000279099	0.00178664	1.06019	1.12342	0.902207	0.947288	0.96138	1.00609	0.832142	0.832565
FBXO10	686.337	0.379616	0.0107251	0.0403469	1.10141	0.882388	1.29588	1.2431	1.2649	1.16858	1.26544	1.33079
FCRLB	70.4445	1.3285	0.000553624	0.00324361	0.142967	0.156434	0.309989	0.200385	0.17583	0.179239	0.397898	0.366203
FENDRR	7907.11	-0.62604	2.86543e-12	7.07882e-11	12.3874	13.7247	9.57822	11.8844	16.0943	12.3323	8.48484	8.64024
FGF7	4243.76	-0.408873	5.54792e-05	0.00042263	8.65223	9.96648	7.30029	8.99479	11.1605	10.534	7.25786	6.94903
FGFR1OP	817.664	-0.353748	0.00559644	0.0237464	1.85353	1.868	1.71346	1.52389	1.63593	1.81431	1.47234	1.47377
FIGN	328.988	-0.833428	5.7047e-06	5.33656e-05	0.457583	0.43083	0.290633	0.334385	0.308557	0.339632	0.25445	0.249225
FLYWCH2	644.007	0.403467	0.0134981	0.0486527	4.68299	3.539	4.98478	4.27041	6.74966	4.88033	5.11931	5.80588
FOLR3	94.067	1.20772	0.000379897	0.00233496	0.502927	0.372371	0.879969	0.396646	0.311956	0.327211	1.05692	0.96732
FOXE1	169.068	0.959341	0.00039271	0.002399	0.305598	0.202024	0.436128	0.160912	0.254828	0.239981	0.498311	0.487587
FOXO1	92.5272	1.11803	0.00125034	0.00655877	0.064341	0.0885175	0.117268	0.09231	0.132133	0.174698	0.162862	0.176459
FOXO4	291.692	0.56991	0.00447534	0.0196489	0.560298	0.504375	0.662693	0.880532	0.637776	0.584559	0.862331	0.733335
FRMD5	286.803	0.904856	4.04629e-06	3.89154e-05	0.270563	0.252914	0.430309	0.274966	0.2659	0.32977	0.493384	0.49605
FUK	516.911	0.435123	0.0133825	0.0483255	0.993466	0.720914	1.19161	1.04893	1.11681	0.960305	1.12204	1.20432
G2E3	1873.56	-0.372101	0.000429133	0.00259328	2.7671	2.7547	2.42292	2.06998	2.39215	2.58334	2.29028	2.02686
GAB1	2038.51	0.370536	0.000212546	0.00140416	1.66007	1.74455	1.71974	1.63045	2.185	1.92868	2.25623	2.20036
GADD45A	2506.73	0.36472	0.000858949	0.00475455	11.5471	12.5043	10.6612	13.3351	12.4176	14.5209	14.6006	16.7411
GALNT3	41.6329	2.22603	2.10731e-05	0.000175905	0.0335962	0.0343241	0.0834988	0.0713367	0.0426253	0.0584441	0.155812	0.166103
GATSL2	2259.4	0.661931	4.46284e-11	9.58999e-10	NA	NA	NA	NA	NA	NA	NA	NA
GATSL3	379.447	0.583765	0.00102934	0.00556388	NA	NA	NA	NA	NA	NA	NA	NA
GBAS	1360.48	-0.79903	1.31043e-12	3.38013e-11	NA	NA	NA	NA	NA	NA	NA	NA
GCA	151.811	0.875145	0.000835538	0.00465434	0.188391	0.172892	0.26257	0.185556	0.240584	0.216299	0.340896	0.327803
GCC2	2157.25	-0.521299	1.25107e-07	1.61649e-06	2.7287	2.79375	2.19734	2.39421	2.5282	2.46847	2.01129	1.88281
GGA2	1601.74	-0.389709	0.000241916	0.00157813	2.24853	2.35889	2.03234	1.95041	2.00374	2.08103	1.80877	1.75167
GID4	621.632	-0.383857	0.00640095	0.0264756	1.29441	1.22823	1.06357	0.998415	1.34548	1.22494	0.983809	0.969527
GIPC1	3884.49	0.445318	6.53336e-05	0.000489723	14.4031	11.291	16.3263	14.443	14.9244	12.5591	16.9091	18.3469
GJA1	29990.9	0.405621	9.16995e-07	1.01879e-05	59.8716	63.4941	76.1702	70.155	78.986	78.3119	86.4793	78.8686
GLB1	5891.77	0.392802	1.09009e-06	1.19128e-05	13.3423	13.5231	17.9329	15.6317	14.9535	13.4466	18.0608	17.6175
GLI4	134.64	0.894784	0.00531631	0.0227296	0.698391	0.378193	0.886958	0.867673	0.985064	0.646883	0.944749	1.04466
GLRB	715.381	0.542865	7.09275e-05	0.000524923	1.40326	1.34429	2.01721	1.45214	1.81016	1.87432	2.11333	1.93345
GLTSCR1L	864.585	0.512757	4.15785e-05	0.000325575	NA	NA	NA	NA	NA	NA	NA	NA
GLTSCR2	2119.35	0.494355	0.000260991	0.00168301	NA	NA	NA	NA	NA	NA	NA	NA
GMDS-AS1	198.845	0.59182	0.0120618	0.04433	0.703743	0.805843	0.97916	0.869132	1.1936	0.937852	1.10998	1.20021
GMPR	350.313	0.533079	0.00414511	0.0183483	1.44896	1.41504	2.15471	1.60226	1.98647	1.6195	2.27677	1.91763
GNPDA1	2148.03	0.326344	0.000793732	0.00445172	6.58979	6.00471	7.33538	6.09691	8.43033	7.81786	7.93497	8.00648
GPAM	763.624	-0.3955	0.00477608	0.0208001	1.01234	1.04516	0.857053	0.811294	1.01264	1.0508	0.855279	0.72944
GPATCH11	562.12	-0.567646	0.000176374	0.00118756	1.24407	1.35776	1.03361	1.2282	1.25376	1.2734	0.89475	0.884407
GPATCH4	559.77	-0.500838	0.00122327	0.00644573	2.23639	2.37221	1.96207	2.07586	1.82014	1.93595	1.76631	1.53545
GPBP1	3527.52	-0.332985	0.000166312	0.00112521	6.23339	6.39639	5.78454	5.08301	5.50031	5.68077	5.00227	5.1397
GPC1	17126.8	0.827815	0.00826227	0.0325389	31.0062	19.9374	37.0011	27.8932	46.1168	38.5759	42.0774	48.998
GPR155	621.867	0.48109	0.000651504	0.00374975	0.52917	0.506939	0.664117	0.627329	0.638345	0.610576	0.736864	0.724571
GPR68	187.508	-1.75968	4.66307e-12	1.1109e-10	0.718844	0.730256	0.540893	0.653154	0.526675	0.507945	0.248566	0.185893
GTF2F1	1920.67	-0.326835	0.00368552	0.0165773	6.92716	5.79986	5.96696	6.36429	6.25046	6.20115	4.90523	5.3233
GTF3C4	1600.46	-0.53852	3.74346e-07	4.45061e-06	1.58115	1.58351	1.29771	1.26855	1.47983	1.44659	1.06505	1.13758
GUK1	4726.46	0.417897	0.000180304	0.00121228	27.2526	20.804	32.5999	27.8529	27.0777	27.3055	31.9455	32.7581
GZF1	798.766	-0.332203	0.0128852	0.0468163	1.4326	1.28084	1.19962	1.18698	1.33291	1.31509	1.13964	1.03652
HCCS	873.183	-0.375613	0.00633303	0.0262915	2.99427	3.34014	2.65921	2.60148	2.71237	2.90944	2.63787	2.31455
HDAC11	562.855	0.436194	0.00456535	0.0200066	1.27615	1.09543	1.35876	1.16822	1.55992	1.37051	1.69551	1.53948
HDHD3	118.704	0.780863	0.00760486	0.0304716	0.338577	0.322573	0.571717	0.463673	0.644708	0.590723	0.576265	0.571297
HECW1-IT1	282.03	-0.567594	0.00524122	0.0224603	1.35103	1.42399	0.736737	1.09943	1.11062	1.05384	0.871719	1.022
HERC5	170.234	0.902925	0.000647166	0.00372784	0.303483	0.211876	0.475587	0.199601	0.486005	0.32836	0.4708	0.492855
HERC6	1444.15	0.43741	0.00209248	0.0102021	2.80946	1.99296	3.07231	1.33863	2.80495	2.41801	3.3524	3.18893
HES4	109.177	1.13764	0.00107361	0.00575873	0.633224	0.374212	0.961761	0.564599	0.766211	0.569139	0.942394	1.25993
HGS	4924.67	0.339636	0.00203346	0.00995586	12.4054	9.8234	14.3708	12.4307	12.2373	11.3586	13.4006	14.9546
HIST1H1C	7647.91	-0.365475	4.46831e-05	0.00034833	92.379	86.0851	75.4025	73.0753	71.1293	89.6778	65.6901	74.2152
HIST1H2AB	551.608	-0.620977	0.000255101	0.00165186	12.1954	9.12693	9.15021	4.89224	8.82318	8.82633	6.73749	7.2005
HIST1H2AL	809.157	-0.519624	0.00396014	0.0176185	18.7248	12.168	13.9104	7.28343	11.3085	12.0453	10.0224	11.6164
HIST1H3C	1729.08	-0.651763	1.21363e-06	1.31098e-05	40.4123	29.5898	28.329	13.9137	23.496	30.5541	23.1073	21.771
HIST1H3D	1417.52	-0.49125	0.000628756	0.00363507	15.8501	11.5095	12.0549	7.6473	9.55092	12.5529	9.21445	10.3686
HIST1H3F	1356	-0.723369	6.655e-06	6.16389e-05	33.2317	21.9263	21.4057	11.3145	17.4652	23.7442	17.7712	15.8486
HIST1H4A	286.906	-0.600137	0.00447771	0.0196532	7.85908	6.2771	5.81757	4.05189	5.22006	7.10881	4.24812	5.12346
HIST1H4B	1579.16	-0.422977	7.86736e-05	0.000575873	40.2477	36.6398	35.4297	24.4681	31.9429	37.3317	30.0073	27.9171
HIST1H4F	604.993	-0.391076	0.00876691	0.034143	15.2925	13.0492	13.4666	9.92729	12.5087	15.7471	10.5706	11.2035
HIST1H4H	1489.47	-0.409941	9.33403e-05	0.000671323	35.3501	33.5811	31.1205	25.1929	26.4985	33.9756	26.104	26.312
HIST2H2AB	482.005	-0.414821	0.0118136	0.0435544	10.2676	8.42204	8.40292	5.05353	7.70196	8.20432	6.91924	7.19391
HMBS	366.353	-0.589649	0.000840078	0.00467036	2.05223	1.89468	1.26292	1.61532	2.0713	2.12152	1.37852	1.27115
HMCN1	235.719	-0.600364	0.00492208	0.0213305	0.117247	0.119162	0.0424394	0.0930683	0.134662	0.158835	0.0759259	0.0817596
HMGCL	1466.57	0.379367	0.000485481	0.00288992	6.31076	5.72252	8.24479	6.48447	7.90489	7.45699	8.1315	7.67139
HMGXB4	1123.11	-0.415557	0.000301011	0.00189918	2.28386	2.29341	1.86737	1.93522	2.21485	2.30418	1.71933	1.75136
HPX	42.9875	1.2609	0.00944462	0.0362889	0.122958	0.113799	0.252117	0.313301	0.162071	0.135291	0.299597	0.273193
HSD11B1	1032.72	-0.401088	0.00095158	0.00519353	5.58161	5.78754	7.86203	4.30814	5.53807	4.91974	4.52654	4.19212
HSD3B7	1084.3	0.605723	1.39385e-06	1.49302e-05	2.99594	2.50204	4.37444	2.64106	3.20782	3.25589	4.13746	4.28849
HSF1	2280.09	0.395807	0.000973177	0.00529904	7.70262	6.06251	8.60806	7.40884	8.61508	7.5058	8.63156	9.60875
HSP90AB1	20892.6	-0.431444	5.54522e-07	6.41472e-06	59.8891	65.6529	54.9413	55.6016	47.5254	56.9282	48.8319	45.3851
HSPB7	126.677	0.802328	0.00513843	0.0220902	0.262218	0.223525	0.276689	0.305602	0.369169	0.330112	0.415083	0.437068
HSPB8	709.431	0.482978	0.000333514	0.00207625	2.29266	2.19107	3.27022	2.66841	2.9408	3.00425	3.13088	3.19982
HSPD1	6282.26	-0.345679	4.943e-05	0.00038089	21.4594	22.2773	21.6276	19.3904	18.5759	20.724	18.0677	16.7591
HUWE1	14338.8	-0.420712	7.02929e-09	1.11958e-07	8.49771	8.38485	6.38504	7.71883	7.36807	7.77491	6.40598	6.34485
IDUA	366.452	0.585379	0.00574465	0.0242561	1.18315	0.832713	1.36108	1.47515	1.62543	1.22241	1.33592	1.69473
IFIT1	5926.02	0.641548	0.0138674	0.0497157	8.87433	6.01729	9.62383	2.46017	10.6966	8.62205	12.2256	11.1892
IGDCC4	2270.77	0.577126	3.80854e-08	5.36022e-07	2.30334	1.96617	2.50706	2.36583	2.992	2.48792	3.11636	3.30533
IGF2-AS	46.4074	1.33225	0.00535235	0.0228599	0.1158	0.0797423	0.171483	0.169777	0.291802	0.22159	0.231455	0.259208
IGF2BP1	2820.44	-0.437452	2.01568e-06	2.08124e-05	2.82877	2.78174	2.15375	2.38092	2.90791	2.65535	2.03348	2.15386
IGFBP6	6330.8	0.553561	4.84545e-09	7.88763e-08	44.1163	36.5595	63.3593	36.167	41.2613	38.2368	59.137	60.307
IKZF5	588.077	-0.384556	0.0133841	0.0483255	1.05611	1.04246	0.888692	0.886804	0.9556	0.988632	0.894206	0.733477
IL1R1	2102.9	-1.62202	4.31094e-57	1.95132e-54	3.96315	4.18991	1.80658	3.13857	5.44794	4.62534	1.35621	1.32491
INCENP	859.709	-0.433997	0.00152828	0.00780381	1.99032	1.63077	1.52866	1.41261	1.18492	1.57502	1.39088	1.31047
INTS6L	279.412	-0.656608	0.00084347	0.00467994	0.694939	0.653114	0.49624	0.552957	0.564957	0.543337	0.428451	0.43511
IRF2BP1	414.627	0.480064	0.0136697	0.0492083	1.20251	0.856693	1.37246	1.19109	1.55696	1.19894	1.33639	1.54347
IRF9	3748.53	0.335872	0.000652092	0.0037516	16.3369	13.6444	19.2583	11.2596	16.5604	15.8754	19.485	18.6867
ITGB1BP1	1968.29	-0.36079	0.00042683	0.00258158	5.80595	6.20395	5.04661	4.92343	5.24452	4.80592	4.75564	4.71379
ITPR1	885.009	0.437556	0.000525136	0.0030935	0.586487	0.528115	0.456338	0.472832	0.728932	0.676725	0.75516	0.767619
JUN	6678.27	0.346289	0.00102214	0.00553133	14.2059	12.6526	16.1036	15.7666	14.1343	14.5515	15.561	18.9015
KALRN	248.229	-0.579627	0.005294	0.0226411	0.110425	0.106642	0.0638782	0.0833027	0.144806	0.118515	0.0709201	0.0757849
KAZN	635.259	0.561685	8.39849e-05	0.000610926	0.418594	0.411915	0.479499	0.563147	0.597085	0.555405	0.596096	0.642848
KCNJ6	77.3197	1.44201	0.000208776	0.00138121	0.107291	0.118213	0.156439	0.144284	0.221835	0.191621	0.253253	0.367656
KCTD4	112.052	1.30967	4.63384e-05	0.000359835	0.188354	0.267711	0.390498	0.429939	0.156994	0.247795	0.580845	0.57777
KIAA0101	478.08	-0.854009	7.3231e-06	6.70305e-05	NA	NA	NA	NA	NA	NA	NA	NA
KIAA1024	147.025	-0.711599	0.0087798	0.0341742	0.205718	0.204483	0.128128	0.145455	0.208846	0.212404	0.14199	0.1119
KIAA1107	2967.19	0.36196	0.000206837	0.00137096	4.321	4.74008	3.71139	3.73334	5.96775	5.15737	5.9429	5.85216
KIAA1462	11316.8	0.559596	1.32618e-13	3.77463e-12	7.74213	7.18214	8.59828	8.35243	9.45683	9.5294	11.0655	11.1556
KIAA1586	936.925	-0.385515	0.00309519	0.0142726	2.44237	2.72423	2.28715	2.02787	2.67754	2.49956	2.06252	1.94767
KIF3A	1096.85	0.361162	0.00306668	0.0141738	1.10204	1.18789	1.39826	1.59371	1.39079	1.36126	1.54657	1.43471
KIF3B	2940.14	-0.41377	9.04811e-06	8.13345e-05	4.05456	4.26983	3.34387	3.9219	3.86888	3.75908	3.14195	3.1817
KIF7	874.938	0.403188	0.00618113	0.0257675	1.43388	1.0825	1.5441	1.66609	1.62096	1.39914	1.62186	1.72342
KIFC2	632.018	0.616583	0.00106402	0.00571389	1.42675	0.904817	1.83475	1.32708	1.81687	1.42063	1.71213	1.87025
KLF11	716.508	0.349879	0.0106029	0.0399625	1.07306	1.14698	1.15144	1.28086	1.31643	1.21558	1.43428	1.43263
KLF5	1499.56	0.457659	2.10609e-05	0.000175905	2.49385	2.61106	3.11185	3.15912	2.81271	3.21624	3.54649	3.55162
KLHDC3	2116.32	-0.375907	0.000143458	0.000989674	8.9946	8.95513	7.868	7.24672	10.6334	8.9416	6.75843	7.22419
KLHL2	851.494	-0.41486	0.00188814	0.00932903	2.1293	2.33539	2.30702	2.1432	1.82918	1.98808	1.7664	1.62887
KRBA2	271.929	-0.567739	0.00665358	0.0273631	0.818935	0.949788	0.69065	0.771387	0.82712	0.914133	0.571597	0.638435
L2HGDH	227.059	0.588667	0.00861298	0.033665	0.204637	0.244587	0.296884	0.305899	0.326215	0.375922	0.344042	0.343105
LACTB2	282.785	0.57181	0.0105985	0.0399564	1.04086	1.17229	1.3174	1.40714	1.66387	1.6229	1.9422	1.40197
LAMTOR1	3416.24	0.371619	1.96063e-05	0.000165135	19.7276	18.5971	24.9962	20.6505	21.9299	21.7011	24.7582	25.3318
LATS1	2002.77	-0.3854	7.18306e-05	0.000531047	2.15644	2.14703	2.00841	2.15896	1.94018	2.05727	1.68571	1.64638
LCOR	2830.29	-0.362611	0.000193302	0.00128979	2.19586	2.38617	1.84124	2.67613	3.09783	2.83212	1.81565	1.79279
LDLRAP1	1412.08	0.79028	5.51901e-13	1.47791e-11	2.76054	2.58907	3.76423	3.05662	3.69032	3.17469	4.54302	4.79819
LINC00341	1067.15	0.532631	1.99945e-05	0.000168177	NA	NA	NA	NA	NA	NA	NA	NA
LINC00520	76.096	1.43521	0.000314574	0.00197499	0.197729	0.108397	0.320827	0.106791	0.112177	0.175341	0.40026	0.41901
LINC00865	55.0249	-1.08828	0.0106437	0.040084	0.141912	0.123036	0.0742027	0.0903286	0.137089	0.0957133	0.0655423	0.0601759
LINC01291	245.282	1.08233	5.04359e-07	5.87317e-06	2.58541	2.25662	2.77944	1.91161	2.45877	2.70558	5.42905	4.90307
LINC01336	136.194	0.775213	0.00548976	0.0233715	1.30799	1.53172	1.5155	1.89311	3.11488	2.12748	2.48985	2.45379
LMO7-AS1	26.2193	1.56043	0.013835	0.0496376	0.185091	0.15573	0.291345	0.372597	0.326159	0.177092	0.576546	0.435235
LOC100507424	43.2558	1.40294	0.00573069	0.0242281	0.147908	0.255728	0.393996	0.690243	0.176431	0.239488	0.528453	0.573493
LOC101927229	1170.18	-0.80101	5.59577e-11	1.18431e-09	NA	NA	NA	NA	NA	NA	NA	NA
LOC101928034	82.2148	0.904829	0.00967582	0.0370251	0.315853	0.308459	0.366337	0.252589	0.589978	0.604405	0.601248	0.580843
LOC101929427	49.1105	1.5272	0.000910611	0.00499714	0.35636	0.329814	0.665739	0.502651	0.345379	0.409151	0.9904	1.00449
LOC102724571	135.256	0.719701	0.0122021	0.0447633	NA	NA	NA	NA	NA	NA	NA	NA
LOC105369340	128.002	0.747594	0.0081915	0.0323601	1.09586	1.00088	1.44542	1.44338	1.18507	1.42099	1.81156	1.74052
LOC155060	304.01	0.494538	0.0101286	0.0384431	0.651707	0.564678	0.740934	0.921257	0.95909	0.902017	0.85756	0.868666
LOC283140	104.228	1.29453	5.64464e-05	0.000429299	0.177856	0.155969	0.238158	0.280761	0.298315	0.319502	0.444966	0.380361
LOC284344	91.3961	1.86942	1.73842e-07	2.18972e-06	0.208722	0.141814	0.232477	0.249735	0.283207	0.266269	0.640123	0.634479
LOC440028	365.542	0.532051	0.00364177	0.0164102	0.919658	1.03611	1.21188	0.991442	0.843617	0.850996	1.37421	1.4948
LOC553103	30.0475	1.84098	0.00202616	0.00993052	NA	NA	NA	NA	NA	NA	NA	NA
LOC728024	29.6859	-2.04152	0.000842502	0.00467807	0.214151	0.269868	0.109775	0.109619	0.114154	0.0640298	0.0713389	0.0488235
LPAR6	157.201	-0.664652	0.00942096	0.0362376	0.415513	0.429197	0.294511	0.263459	0.474302	0.463815	0.263653	0.275582
LPCAT3	773.675	-0.35533	0.00728263	0.029441	2.78882	2.93774	2.09413	2.39159	2.81909	2.66414	2.26241	2.27028
LRCH4	1102.66	0.491294	0.00135345	0.00701883	2.55002	1.76526	2.81277	3.01549	2.58441	2.51652	2.98175	3.11258
LRP1	65879.4	0.398192	0.000143816	0.00099166	32.8382	25.168	33.8545	48.1516	34.8091	32.4053	37.2174	39.8917
LRP1B	379.594	-0.867911	1.48411e-06	1.58245e-05	0.218502	0.231035	0.0731578	0.186023	0.265356	0.210214	0.115818	0.133309
LTK	815.607	0.662562	2.67733e-06	2.67963e-05	1.71035	1.36271	2.33214	1.83035	2.3207	1.78908	2.48799	2.40628
LUC7L2	244.184	0.560008	0.010079	0.0383171	0.551951	0.443539	0.662625	0.679732	0.599649	0.600829	0.707162	0.767218
LYRM9	207.27	0.829552	0.0012827	0.00670098	0.949972	0.592374	1.00078	1.07498	1.24327	1.199	1.36459	1.37182
MALSU1	774.604	0.362932	0.00521206	0.0223725	6.87232	6.73607	8.7317	7.39641	8.88417	7.67541	8.80516	8.88802
MANEAL	28.9232	1.55737	0.00951478	0.0365184	0.0353263	0.0360916	0.0438993	0.0867002	0.104581	0.110617	0.117375	0.0958485
MAPK11	392.546	0.551068	0.00227948	0.0109916	1.10411	0.889996	1.60091	1.25625	1.49574	1.37449	1.40951	1.52719
MAPRE2	5102.95	0.662874	9.13161e-16	3.37197e-14	6.07477	6.19347	6.97255	5.75944	5.91811	6.21328	9.91268	9.73685
MARC1	51.533	1.27642	0.00484401	0.0210633	0.120111	0.085284	0.125673	0.101205	0.265586	0.259633	0.264205	0.233084
MARCH2	970.727	0.377918	0.00303609	0.0140556	4.21243	3.55983	4.94581	4.31366	3.97368	3.8569	5.05279	5.12269
MARCKSL1	1074.92	-0.373034	0.00202725	0.00993237	5.66617	6.09375	4.56397	5.93135	6.34968	6.28307	4.67432	4.52485
MAST2	2532.11	-0.329329	0.000419313	0.0025427	3.3673	3.10748	2.57461	2.70242	2.60732	2.90104	2.57201	2.6319
MED20	1375.29	0.411351	0.000273664	0.00175746	3.25096	3.26092	4.38597	3.6812	3.46974	3.28423	4.61885	4.14607
MED25	554.079	0.507597	0.00351823	0.0159199	1.7205	1.25563	1.89777	1.70132	1.91184	1.40167	2.00397	2.24265
MED30	210.624	-0.57448	0.0115418	0.0427286	1.9551	1.92196	1.62474	1.08163	2.07354	1.91906	1.42696	1.20934
MEG8	451.305	0.678512	6.99675e-05	0.000519462	4.92893	5.60286	7.48622	105.431	6.46262	5.00347	9.03168	8.09286
MELTF	31.8481	1.552	0.00744729	0.0299686	0.0311102	0.0205662	0.0642616	0.0371183	0.0659315	0.073422	0.0821191	0.0687778
METRNL	146.603	0.929038	0.00717279	0.0290556	0.328165	0.153497	0.324448	0.252617	0.540091	0.399884	0.381883	0.5277
MFSD2A	36.0549	-1.56421	0.00650572	0.0268495	0.225442	0.146054	0.102723	0.090268	0.181789	0.232955	0.041198	0.0837318
MICAL1	3004.42	-0.324565	0.00054603	0.00320046	6.8146	6.02668	5.30752	5.02562	6.12808	5.76582	5.26579	5.08611
MICALCL	27.5658	-1.53077	0.0132068	0.0478363	0.11145	0.09318	0.0477951	0.0735798	0.0381234	0.0282266	0.0274552	0.043481
MIEF2	601.548	0.461699	0.00351977	0.0159218	1.64101	1.27187	1.74641	1.32969	1.59995	1.46541	1.9906	2.04164
MIER1	2875.8	-0.336384	0.00471463	0.0205836	2.94399	3.34037	2.6758	2.53107	2.85703	3.03657	2.77625	2.26842
MIER3	1029.1	-0.521145	7.04856e-05	0.000522204	1.63754	1.87707	1.45746	1.30006	1.65782	1.65635	1.28906	1.19506
MIGA1	1515.23	-0.343924	0.00252623	0.0119838	1.98316	2.02313	1.88811	1.69043	1.81283	2.02256	1.70916	1.48668
MINA	1052.08	-0.410448	0.000841478	0.00467628	NA	NA	NA	NA	NA	NA	NA	NA
MIPEP	985.972	-0.346537	0.00484358	0.0210633	3.35204	3.53033	3.04348	2.62049	4.15013	4.10723	2.81508	2.66728
MIR1185-2	49.1434	1.52686	0.00102109	0.00552777	1.99562	2.48331	5.56279	4.84274	3.82274	4.82958	6.88253	6.30638
MIR3064	304.057	0.570704	0.00617605	0.025754	24.9452	30.9825	51.1138	35.8161	31.5321	25.7476	45.7007	38.9047
MIR329-1	28.1276	1.54296	0.0131104	0.047524	1.12253	1.56662	4.31918	2.91321	2.03083	2.74472	4.7485	3.3089
MIR380	27.0944	1.62252	0.00966738	0.0370029	1.3086	1.94644	2.53412	4.11832	2.66339	2.03457	5.10658	5.20745
MIR433	72.4068	1.07034	0.00494987	0.0214306	3.86248	3.75917	7.2353	6.93215	5.82317	5.13271	7.18912	8.96606
MIR541	49.1382	1.182	0.0106356	0.0400643	2.85088	2.5914	4.22176	5.11659	2.30253	3.18228	5.3364	7.0905
MKL2	870.002	-0.35156	0.00488805	0.0212219	0.843202	0.834262	0.601319	0.689388	0.860001	0.897724	0.655827	0.673341
MKLN1	5705.34	-0.350048	5.73605e-05	0.000435307	4.08822	4.39328	3.45089	3.41022	3.79576	3.79366	3.377	3.35758
MLLT11	284.227	-0.576052	0.00311891	0.0143632	1.22992	1.16153	0.981776	0.997217	1.14721	1.31391	0.820315	0.800392
MLST8	839.754	0.418928	0.00478422	0.0208291	3.01234	2.30565	3.51432	3.35484	3.36991	3.13742	3.40913	3.7384
MOK	524.229	-0.400943	0.00837193	0.0329338	1.17714	1.20819	1.31512	1.20621	0.820816	1.05068	0.93842	0.890758
MOXD1	8404.48	0.512415	6.28027e-10	1.14895e-08	16.6989	17.7307	18.8543	15.8257	24.1486	19.789	25.2954	24.4064
MPG	2143.22	0.410786	0.00181056	0.00901874	11.6363	8.42018	13.6591	11.2418	13.6442	11.9883	13.0563	13.776
MPHOSPH9	956.973	-0.450493	0.00018735	0.00125604	1.87325	1.86196	1.74359	1.66959	1.61975	1.78591	1.39077	1.37373
MRE11A	1223.33	-0.338828	0.00293539	0.0136524	NA	NA	NA	NA	NA	NA	NA	NA
MRPL36	1052.91	-0.382751	0.00365667	0.0164615	14.6583	14.7503	13.4766	11.8062	11.1511	12.299	12.5472	10.2932
MRPL54	752.348	0.352608	0.00813071	0.0321914	8.08817	7.99389	10.3044	9.54654	8.49401	9.20972	10.061	10.6968
MRPS10	1846.28	-0.351664	0.000888235	0.00489926	7.11521	7.5364	6.82826	6.08596	6.08074	6.90139	6.04967	5.57875
MRPS18C	528.562	-0.583011	0.000120721	0.00084529	4.31386	4.4095	3.80734	2.80954	4.24418	4.37889	3.02248	2.87312
MTBP	289.504	-0.557573	0.0054397	0.0232006	0.791911	0.897453	0.686321	0.537298	0.583934	0.698927	0.607906	0.557379
MTFR1	921.498	-0.3343	0.0105243	0.0397515	2.42604	2.65791	2.27028	2.35114	2.21223	2.27128	2.13527	1.9529
MTHFD2	4245.15	-0.354789	0.00115347	0.00611696	14.4846	17.0724	13.0247	17.5324	18.1545	17.7609	13.1836	11.8252
MTOR	3925.47	-0.401348	2.56722e-06	2.58046e-05	3.85514	3.90636	3.19845	3.28758	3.85096	3.87892	2.95805	2.98541
MTX3	2540.12	-0.344621	0.00080384	0.00450459	2.67373	2.75358	2.2383	2.12335	2.45337	2.48959	2.31069	2.01604
MXD4	2812.89	0.326256	0.0112976	0.0420385	5.81283	4.25008	5.02972	5.2777	7.1111	6.12081	6.02089	6.68095
MYCT1	45.6263	1.78518	0.000228496	0.00150036	0.0524644	0.0498569	0.122515	0.0656468	0.0508478	0.141179	0.182262	0.173981
MYOCD	226.879	-0.622277	0.00770921	0.0308105	0.210886	0.274203	0.133783	0.32939	0.300824	0.312134	0.161462	0.159186
MYOZ2	52.6705	1.24988	0.00457398	0.0200381	0.0960539	0.0863587	0.122547	0.085079	0.0655383	0.0919027	0.231117	0.206408
MYRF	86.8398	0.891087	0.0104595	0.0395386	0.0865344	0.068207	0.109189	0.136293	0.109674	0.0748335	0.134314	0.153415
NAA50	7023.49	-0.436995	4.02153e-07	4.77009e-06	9.73348	10.1396	8.74317	7.79723	8.11956	8.46043	7.7641	7.0905
NADSYN1	2592.37	0.351319	0.000570914	0.00333655	7.64575	6.59357	8.89095	8.71021	8.72664	7.81034	8.84823	9.4719
NAGPA	664.469	0.5123	0.000774408	0.00435531	1.89714	1.86332	2.51509	2.15665	2.88937	2.3208	2.4454	2.97187
NAT10	1451.12	-0.378489	0.000423707	0.00256823	3.08898	3.0639	2.61697	2.75558	2.58458	2.83736	2.47237	2.31566
NCAPD3	1154.46	-0.478187	3.73688e-05	0.00029558	1.79979	1.83354	1.53794	1.40023	1.26848	1.60619	1.36499	1.27515
NCKAP5L	1778.34	0.409444	0.000986174	0.00536149	2.66557	2.07581	3.00441	2.99459	2.91777	2.49972	3.03904	3.3008
NDFIP2	3704.53	0.378855	1.90535e-05	0.000160963	5.25591	5.23168	6.16489	5.43703	5.44962	5.42253	7.16344	6.6306
NDUFS3	934.883	-0.365463	0.00281294	0.0131483	8.27171	8.364	6.73206	6.55525	8.50289	7.70517	6.46469	6.5971
NEB	39.8153	1.34239	0.00794259	0.0316082	0.00644799	0.0065193	0.0107152	0.00713332	0.0058817	0.00471772	0.0161731	0.0171061
NEGR1	1351.79	-0.487385	1.48419e-05	0.000128556	2.05053	2.1654	1.55747	1.75495	1.85873	1.92992	1.56535	1.48022
NEK10	264.067	-0.690852	0.00239232	0.0114453	0.452569	0.611189	0.351544	0.428185	0.543059	0.589719	0.319985	0.350186
NEK6	5961.09	0.440159	1.50343e-07	1.91609e-06	12.4275	11.1023	14.7779	14.3405	13.9603	13.7746	16.2826	15.9513
NFKBIE	743.215	-0.430472	0.00214975	0.0104596	2.74097	2.28225	2.46262	2.10263	2.21214	1.71629	1.88394	1.87175
NFYA	1036.68	-0.439725	0.000298207	0.00188319	1.41352	1.49342	1.24281	1.42746	1.43061	1.42151	1.06163	1.10776
NIPBL-AS1	297.724	-0.686264	0.00110321	0.00589052	0.557455	0.487239	0.455162	0.495941	0.407566	0.442083	0.374609	0.281635
NME3	517.234	0.586886	0.00247163	0.0117725	3.72948	2.49149	4.68102	3.23267	4.69226	3.92607	4.28582	5.07757
NME7	609.679	-0.442804	0.00386878	0.0172848	2.943	3.30202	2.56977	2.29049	2.4955	2.75972	2.47301	2.18909
NMT2	7445.05	0.338859	5.12825e-05	0.000393437	9.52856	10.1505	12.4151	11.8162	8.41522	9.00735	12.7272	12.4615
NOX4	221.375	-0.582697	0.00807053	0.0319993	0.398678	0.350592	0.354866	0.360551	0.263107	0.283868	0.2485	0.255808
NPPB	45.594	2.00423	8.31346e-05	0.000605369	0.228724	0.170105	0.560171	0.381591	0.254928	0.382968	0.946978	0.654196
NRG1	895.43	-1.07996	5.10606e-18	2.36463e-16	0.856718	0.851981	0.892018	1.44137	0.749619	0.643538	0.416335	0.401302
NRTN	59.6848	1.84358	5.76339e-05	0.000436909	0.224934	0.136803	0.262377	0.477615	0.746443	0.29269	0.520665	0.763822
NRXN3	285.971	0.877838	2.20809e-05	0.000183228	0.0963295	0.114993	0.0972583	0.104268	0.0811371	0.0921664	0.188911	0.205916
NSDHL	564.657	-0.370164	0.012105	0.0444421	3.073	2.85299	2.0529	2.35824	3.13257	2.72934	2.38648	2.24518
NUDCD2	704.697	-0.418788	0.00383187	0.0171512	0.654797	0.71873	0.58034	0.461639	0.59478	0.624349	0.554169	0.487918
NUP35	371.495	-0.47241	0.0113692	0.0422493	1.5569	1.70004	1.32814	1.16029	1.16086	1.46106	1.31045	1.07218
OGFOD3	1076.35	0.413877	0.00174528	0.0087557	1.73561	1.37538	1.93224	1.69947	2.09655	1.96522	2.05217	2.11893
OXCT1	752.445	-0.423211	0.00183728	0.00913238	1.81445	1.85578	1.5155	1.52016	1.67428	1.82458	1.46058	1.31129
OXR1	2157.2	-0.436309	8.727e-06	7.87507e-05	3.47425	3.47866	2.83484	2.75863	2.77959	2.90042	2.69737	2.50126
PACS2	3014.65	0.416274	0.000534314	0.00314228	3.24509	2.47685	3.68464	3.23796	3.7527	3.34411	3.65433	4.03645
PAFAH2	569.212	-0.456495	0.00183825	0.00913395	1.40992	1.37783	1.06648	1.12245	1.56199	1.56759	1.0587	0.99609
PARM1	280.01	-0.519201	0.00830061	0.0326807	0.48765	0.501182	0.206905	0.409032	1.02255	0.538356	0.348762	0.349615
PARP9	3971.4	0.403987	0.000145304	0.000999093	3.60872	2.90329	4.25298	1.93927	4.04428	3.80222	4.53455	4.15552
PATZ1	589.913	-0.440395	0.00376041	0.0168636	1.17036	0.972256	0.857013	0.815585	1.22705	1.17329	0.810704	0.780343
PCAT1	16.633	4.86181	9.79807e-05	0.000701462	0.0100181	0	0.0730363	0.0546997	0.0116514	0.0143778	0.102979	0.142854
PCBD1	545.835	0.407384	0.00691167	0.0282096	2.1721	2.22324	2.76671	2.33789	2.81327	2.81033	3.06347	2.84029
PCDHB14	416.791	-0.441269	0.00786267	0.0313346	0.906411	0.928772	0.809951	0.768326	0.979996	0.860011	0.690167	0.677978
PCDHGA2	486.483	-0.409173	0.00839634	0.0330206	0.85654	0.854725	0.641838	0.642161	1.1205	0.959346	0.649103	0.654242
PCDHGB1	558.578	-0.428125	0.00611411	0.0255641	1.02506	1.07937	0.835596	1.14338	1.02449	0.943512	0.734401	0.847664
PDGFRB	17143.5	0.328641	6.61665e-06	6.13647e-05	20.7944	19.5522	23.724	26.9962	26.5795	23.8437	25.4188	25.7775
PDLIM2	3825.66	0.745927	1.10659e-08	1.71009e-07	4.37094	3.0505	5.19823	4.22242	5.19111	4.06311	6.12216	6.40662
PDXK	5873.32	0.375562	6.53154e-05	0.000489723	5.59669	4.66184	6.53568	6.27214	5.5014	5.55533	6.68528	6.74107
PFKFB2	112.537	1.12822	0.000204305	0.00135803	0.0578408	0.0591595	0.0964697	0.105933	0.0871551	0.115903	0.12797	0.13101
PGAM5	1038.39	-0.331562	0.00667722	0.0274523	2.88855	2.51161	2.50659	1.7645	2.37754	2.84586	2.18075	2.14763
PGLS	1800.81	0.433408	0.00103876	0.0056061	12.8538	9.69028	14.8619	12.865	16.0491	12.1875	14.3869	16.2501
PHF8	713.921	-0.514036	0.000204612	0.00135887	0.899572	0.861931	0.756913	0.80983	0.715669	0.766969	0.58936	0.656107
PHLDB2	2771.4	0.617208	2.11267e-10	4.12882e-09	2.42523	2.57617	2.45995	1.90358	2.90936	2.86088	3.77815	3.98727
PHPT1	2232.62	0.330867	0.0079939	0.0317583	10.5023	8.08432	11.3691	9.97244	10.7967	10.0366	11.0771	12.4626
PIGC	654.485	-0.413292	0.0033517	0.0152599	3.69189	3.85662	3.27955	2.87538	3.08428	3.3223	2.95293	2.7883
PIGN	1997.24	-0.360291	0.000839588	0.00467036	3.38743	3.58838	3.06458	2.91185	3.04223	3.22732	2.92059	2.58332
PIK3CG	317.083	-0.485569	0.0111743	0.0416683	0.404059	0.359439	0.327442	0.24143	0.296466	0.336001	0.258105	0.291367
PKD1L2	412.651	1.30278	8.95439e-12	2.06998e-10	0.258242	0.183542	0.356871	0.2898	0.239709	0.263321	0.564973	0.52669
PKD1P1	98.3906	1.27772	0.00027955	0.00178871	0.0427972	0.0272444	0.0527236	0.0447156	0.0792699	0.0371561	0.0748293	0.0940895
PKN1	5687.83	0.365187	0.0016144	0.00818105	13.7899	10.3109	14.9965	11.8665	15.5643	13.0934	15.1007	16.1815
PLAC9	114.301	0.769221	0.0117263	0.0432743	0.848951	0.653478	1.0068	1.02302	1.19925	0.734373	1.24856	1.31893
PLAU	12177.8	-0.506738	9.95513e-09	1.54867e-07	38.0486	42.3455	46.0391	49.5412	51.2798	39.6763	28.2632	29.0024
PLBD2	2043.6	0.403471	0.00158834	0.00807406	5.36251	4.08774	5.41022	5.30423	5.73408	5.14761	5.92086	6.6622
PLCD3	2435.88	0.431657	2.20353e-05	0.000182958	4.88117	4.2004	5.17167	5.00381	5.97912	5.49584	6.03821	6.31448
PLEKHG4	1924.72	0.588562	1.66066e-08	2.47897e-07	2.45089	2.13741	3.03041	2.26781	2.21043	2.28869	3.55321	3.40708
PLIN3	8663.32	0.359408	3.86232e-05	0.000304815	26.557	22.6867	30.2906	25.6055	27.0579	29.0485	32.2443	31.5222
PMS2	503.532	-0.429342	0.00978169	0.0373717	0.737518	0.838359	0.627839	0.554925	0.928882	0.927664	0.636899	0.551185
PNMAL1	198.767	0.583973	0.0109657	0.0410759	NA	NA	NA	NA	NA	NA	NA	NA
PODXL	904.297	0.627025	1.63298e-06	1.71573e-05	0.972129	0.833354	1.27491	0.646414	0.722711	0.808866	1.36234	1.44654
POLA2	568.821	-0.420742	0.00419591	0.0185381	1.3599	1.34128	1.1696	0.935183	0.842673	1.15743	1.05626	0.985245
POLD3	855.105	-0.350605	0.00878295	0.034177	1.66181	1.84053	1.6	1.10242	1.45655	1.57386	1.35154	1.43122
POMT1	1508.33	0.378645	0.000808893	0.00453109	3.16493	2.71955	3.84291	3.55769	3.98021	3.71893	3.75616	3.95583
POR	1509.08	0.348903	0.0124309	0.0455076	4.64366	3.43936	5.00316	4.21608	6.30003	4.88994	4.834	5.52146
POSTN	1551.54	-0.43854	0.000208399	0.00138002	3.71078	4.28368	3.78786	6.09552	3.63249	4.29043	2.97385	3.00542
POU5F1B	13.2645	3.51273	0.00109052	0.00583829	0.0125906	0.00832338	0.0172108	0.0439208	0.0195243	0.0120465	0.143803	0.091856
PPDPF	871.598	0.578349	0.00030947	0.00194643	7.89771	5.80676	8.36745	10.4825	9.23999	6.58573	9.34787	11.2085
PPIL3	745.937	-0.397996	0.00284592	0.0132847	4.95766	5.14427	4.26771	4.00944	4.62852	5.11117	3.85255	3.90721
PPM1A	3348.67	-0.34149	0.000664763	0.00381512	2.36645	2.59945	2.17885	2.0095	2.25032	2.34029	2.08012	1.88956
PPP1R15A	6232.99	0.387903	0.000260698	0.00168189	17.0921	17.2588	18.892	20.9901	20.5993	20.0672	20.3506	25.0771
PPP2R5A	1665.17	-0.496872	2.46793e-06	2.49137e-05	4.2279	4.41941	3.67715	3.3121	3.67455	3.56714	3.04794	3.1529
PPP4R2	3929.35	-0.335393	0.000317437	0.00199207	5.94074	6.33414	5.8592	4.82316	6.91995	6.6228	5.1189	4.73032
PPP4R3A	3035.39	-0.380567	4.12957e-05	0.000323902	5.48545	5.7898	4.54355	4.69393	5.9705	5.38291	4.43536	4.33105
PQLC1	1291.61	0.360839	0.00803092	0.0318783	3.87121	2.89365	4.43213	3.5502	4.61331	4.03039	4.28261	4.45609
PRDX6	10787.3	-0.528107	2.67054e-11	5.91057e-10	56.4389	59.1572	52.6578	47.1569	47.8551	48.9347	40.754	40.3409
PRELP	84.3057	1.3878	0.000112762	0.000795917	0.0703044	0.0521445	0.0578178	0.0447323	0.1396	0.098438	0.167124	0.153532
PRKCDBP	5075.59	0.340694	0.00217222	0.0105586	NA	NA	NA	NA	NA	NA	NA	NA
PROSER2	838.493	0.888386	7.28779e-10	1.32464e-08	1.51782	1.16964	1.90427	1.23866	1.65965	1.56679	2.49834	2.50178
PRUNE2	255.884	0.961958	9.87949e-06	8.80744e-05	0.113498	0.0859628	0.104801	0.0633843	0.157935	0.145989	0.195735	0.193923
PSAP	46704.2	0.384404	4.86092e-08	6.73331e-07	109.101	102.883	138.836	114.329	122.007	116.35	142.032	137.609
PSD3	3051.67	-0.385783	2.32552e-05	0.000191613	2.17311	2.25583	1.74357	2.10115	2.22912	2.10825	1.70413	1.72551
PSG4	2880.2	0.336392	0.000159203	0.00108391	8.96094	8.84169	9.00074	9.86754	6.87292	7.71058	11.3438	11.3827
PSMA4	3448.68	-0.340395	0.00065238	0.00375172	19.4615	21.8584	18.6304	16.3511	21.9164	23.0558	16.917	16.1414
PSMB5	4198.22	-0.440285	1.27367e-07	1.64115e-06	25.3158	25.0831	21.7882	19.6549	21.8527	22.8954	19.0306	18.5289
PSMC2	3582.23	-0.324144	0.000377714	0.00232664	9.10461	9.69098	8.02508	7.40932	8.5945	9.19888	7.67807	7.51873
PSMD14	3049.59	-0.44418	1.77631e-06	1.84905e-05	15.1792	15.8395	13.531	12.0117	12.1837	14.1284	11.8676	11.2083
PTBP2	1194.22	-0.430867	0.000322167	0.00201905	2.56823	2.81257	2.28386	2.13392	2.48859	2.62056	2.07762	1.9675
PTCHD4	260.33	0.687201	0.00124123	0.00652318	0.329583	0.257379	0.353042	0.45427	0.333251	0.250796	0.481362	0.467861
PTGIR	100.074	0.847863	0.011363	0.0422372	0.315701	0.208703	0.475138	0.362741	0.4228	0.320364	0.466199	0.475873
PTGIS	337.37	1.38466	1.43664e-13	4.07251e-12	0.265346	0.241342	0.610204	0.19339	0.28306	0.192539	0.65223	0.681505
PTPN4	1044.08	-0.335722	0.00846974	0.0332366	0.735642	0.813812	0.682376	0.622099	0.851151	0.817942	0.652271	0.592578
PTPRM	7178.31	0.374838	3.022e-06	2.99257e-05	8.32278	8.59165	9.5363	10.0417	10.2232	9.11895	11.2105	10.9785
PVT1	778.027	0.448775	0.00104156	0.00561674	2.42766	2.70311	3.22474	3.19521	2.305	2.39163	3.51291	3.58862
QSOX2	1364.09	-0.355341	0.00172767	0.00868914	2.66317	2.46887	2.31042	1.99552	2.21018	2.45948	2.13861	1.91545
RAB23	4268.52	0.403485	1.19216e-05	0.00010488	5.34984	5.83038	6.80058	5.57553	7.01538	6.82356	7.6098	7.36493
RAB33B	855.66	0.446788	0.00119781	0.00633057	1.42139	1.41544	1.89477	1.76923	1.65011	1.64133	2.1351	1.77935
RABGAP1L	1625.11	-0.338481	0.001337	0.00694586	1.3105	1.33601	1.0464	1.15005	1.12031	1.15742	1.02929	1.08758
RAD18	926.339	-0.329049	0.00712141	0.0288891	1.35614	1.36776	1.2406	1.09382	1.13102	1.29421	1.10409	1.08971
RAD54L	149.877	-0.895985	0.00062347	0.00360913	0.485266	0.454988	0.416209	0.244369	0.218865	0.361117	0.253575	0.256635
RAF1	27980.4	-0.418157	2.76352e-06	2.75998e-05	69.2585	78.7425	60.3554	69.8002	66.1252	76.0745	56.0644	56.0462
RASSF1	1839.73	0.417983	0.000235391	0.00154274	5.58074	4.62922	6.94002	5.29158	4.7627	4.67568	7.17298	6.5811
RBCK1	2717.27	0.402479	0.00100461	0.00544692	4.71644	3.55963	5.72093	4.57068	5.63734	4.39275	5.27645	5.73923
RBM15B	3208.42	-0.335523	0.000168316	0.00113712	4.23144	3.95002	3.56707	3.57251	3.85893	3.666	3.21278	3.33582
RBM17	1906.83	-0.370982	0.000823145	0.00459808	3.85167	4.36643	3.20471	3.39426	3.89657	3.90936	3.2742	3.16605
RBM47	66.4318	1.77147	1.50778e-05	0.000130198	0.0456314	0.0414781	0.0883658	0.0715154	0.101718	0.101872	0.166487	0.133668
RBMX	6211.77	-0.378474	1.53583e-05	0.000132295	15.3071	15.8145	12.226	12.6699	15.8464	16.6281	12.7197	11.5052
RDH11	2846.97	-0.384745	0.000541736	0.00317927	8.92857	10.0859	7.77175	8.28072	8.52612	8.75469	7.91132	6.84725
RFX8	200.513	-0.917294	6.95002e-05	0.000517362	1.20614	1.09493	1.04656	0.696722	0.590641	0.905543	0.637161	0.593268
RHOT2	1759.14	0.364343	0.0128797	0.0468085	5.41689	3.79377	6.14905	5.52953	5.85564	5.10768	5.53231	6.39131
RNASET2	285.023	0.570049	0.00412707	0.01828	1.50869	1.28232	1.64402	1.34628	1.93103	1.89409	2.09086	2.08064
RNF13	2276.8	0.335155	0.000874693	0.00483216	4.93518	5.35002	6.46696	5.8155	6.53583	5.68173	6.59535	6.54636
RNF185	5175.29	0.344484	2.04449e-05	0.000170967	10.0326	9.85173	11.3473	9.56501	8.64655	8.51721	12.9882	12.539
RNF38	1427.78	-0.408701	0.000143363	0.000989506	2.20519	2.23355	1.96544	1.95667	1.83918	1.7837	1.66953	1.71247
ROBO2	572.463	-0.504217	0.000794494	0.00445399	0.550652	0.576736	0.315394	0.650019	0.511823	0.510985	0.384763	0.41948
RPL18	14627.3	0.346055	0.000206372	0.00136853	121.042	99.4945	137.39	125.986	132.183	140.254	137.947	144.905
RPL18A	13608.1	0.32537	0.00522355	0.0224081	158.683	114.988	157.454	125.421	180.776	172.782	169.061	176.59
RPLP1	18299.3	0.342301	0.00116157	0.00615524	269.954	208.929	282.789	275.23	300.908	287.077	293.813	318.495
RPLP2	12599	0.329751	7.19955e-05	0.000531706	181.751	161.95	206.963	176.329	215.979	194.326	210.96	225.193
RPS19	33812	0.357424	5.63139e-07	6.49299e-06	217.002	204.392	265.538	225.285	251.302	221.68	278.014	267.571
RSAD2	87.9002	1.37813	0.00027631	0.00177283	0.139216	0.0751285	0.302928	0.048262	0.251128	0.141354	0.257436	0.293957
RWDD2B	609.853	-0.472966	0.00589529	0.0247895	2.73432	3.18881	2.39634	2.15214	3.01766	3.16998	2.45558	1.87931
S1PR3	477.244	-0.496738	0.00153363	0.00782827	0.959605	0.969599	0.760514	0.847728	1.21478	1.01604	0.692579	0.690737
SAMD13	37.4951	-1.28524	0.0134547	0.0485338	0.215832	0.230486	0.146255	0.130939	0.218836	0.169439	0.105347	0.0807497
SCARNA17	615.713	0.352049	0.0130059	0.0471572	9.93067	9.55755	13.5207	11.7474	12.0182	10.9982	12.416	12.7169
SCD	9656.75	-0.45536	2.73908e-09	4.65312e-08	15.5127	15.4496	7.37685	13.1995	18.5362	20.2582	11.6826	11.1527
SCD5	1528.04	0.516804	2.04963e-06	2.11318e-05	2.2726	2.16752	2.37596	2.11179	2.59084	2.87695	3.37061	3.05153
SEC14L5	32.6941	1.69193	0.00314537	0.0144518	0.0154555	0.0204346	0.0154931	0.013127	0.0227685	0.0266176	0.0635486	0.0553534
SEMA3C	3598.24	-0.39146	2.10876e-05	0.000175922	5.93786	6.02258	5.49904	4.9326	5.35454	6.31598	4.84284	4.3833
SERAC1	888.39	0.392601	0.00205669	0.0100556	1.33367	1.38019	1.57171	1.4657	1.31919	1.42524	1.87326	1.73511
SERF2	9662.14	0.376579	8.22638e-07	9.242e-06	16.8496	15.6479	21.8858	16.3535	19.0939	17.8532	21.5597	21.0657
SERPINI1	65.2369	1.08019	0.0101648	0.0385396	0.170565	0.149237	0.370304	0.260215	0.120579	0.235191	0.420179	0.262849
SETD7	8385.66	0.550183	6.82802e-12	1.59419e-10	5.8479	6.09804	7.27694	7.42653	7.0168	6.95	8.9328	8.76522
SFXN5	693.364	0.354167	0.0101749	0.0385667	0.829223	0.858494	1.05694	1.1175	1.00548	0.924452	1.06669	1.1169
SGK223	1430.08	0.397421	0.00142267	0.0073339	NA	NA	NA	NA	NA	NA	NA	NA
SGSM2	3441.52	0.400737	0.000105045	0.000746323	5.10897	4.15266	4.78845	4.58951	6.10082	5.33933	6.16768	6.15958
SH2D5	2670.63	0.61753	2.43499e-07	2.99718e-06	4.76522	3.59578	5.24378	3.59274	3.40616	3.9044	6.40663	6.51079
SH3D19	5410.76	0.411403	7.73048e-06	7.03464e-05	6.00697	6.65686	7.86162	7.68643	6.23462	6.66199	8.62511	8.43046
SHFM1	1419.4	-0.384762	0.000512199	0.00302873	NA	NA	NA	NA	NA	NA	NA	NA
SHOX2	288.659	-0.525748	0.00751148	0.0301491	0.832796	0.771578	0.578364	0.626379	0.792133	0.722752	0.532751	0.591352
SHTN1	381.342	0.56655	0.00249687	0.0118686	0.358041	0.424491	0.499381	0.61034	0.583887	0.537171	0.549085	0.627666
SIAH1	844.916	-0.343928	0.0133866	0.0483255	2.65336	3.07228	2.38159	2.18791	3.07663	2.98602	2.36721	2.21035
SLC13A3	134.572	0.911511	0.00174362	0.00875054	0.143722	0.188465	0.257653	0.253	0.239311	0.182596	0.301392	0.335969
SLC16A12	129.853	1.25401	1.26703e-05	0.000111119	0.133847	0.118453	0.179027	0.1958	0.0769968	0.101211	0.317251	0.289225
SLC16A5	289.79	0.543683	0.0139369	0.0499013	1.01615	0.681087	1.09322	1.02603	1.18911	1.01725	1.26089	1.21685
SLC19A2	457.097	-0.482993	0.00312317	0.0143733	1.08947	1.13022	1.07036	0.796635	0.97451	1.04238	0.848356	0.760793
SLC1A2	718.009	0.554563	8.22542e-05	0.000599892	0.344985	0.363307	0.427709	0.465068	0.393139	0.401464	0.499705	0.55339
SLC25A33	190.869	-0.921447	0.000253017	0.0016414	1.20884	1.37705	1.00826	0.691939	1.19145	1.09779	0.790441	0.597913
SLC25A34	119.18	0.973769	0.00199266	0.00979369	0.220797	0.178162	0.319572	0.360487	0.284486	0.254748	0.331298	0.454395
SLC31A2	594.79	0.43929	0.00219953	0.0106713	2.17673	2.13803	3.53674	2.51657	2.08458	2.14723	2.97651	2.93959
SLC35B4	2215.15	-0.415035	1.61682e-05	0.00013876	2.7965	2.83306	2.51642	2.32055	2.30449	2.52014	2.18507	2.08682
SLC35D2	1705.5	0.357776	0.000792671	0.00445025	3.53383	3.79462	5.00425	3.8243	3.80438	3.59436	4.70761	4.80321
SLC35F6	3819.61	0.333625	7.38649e-05	0.000543509	6.68521	6.41755	8.44219	7.93275	8.44845	7.99475	8.34531	8.34161
SLC39A10	2548.11	-0.49759	2.61714e-07	3.19336e-06	4.02013	4.16073	3.42161	3.37075	4.41086	4.43389	3.04179	2.8232
SLC48A1	592.543	0.39923	0.00593241	0.0249083	1.25301	1.29795	1.44158	1.2051	1.7467	1.72435	1.72536	1.68172
SLC6A8	1045.79	0.55783	3.64924e-06	3.55846e-05	1.84324	1.67164	2.52086	2.00373	2.35017	2.25738	2.69471	2.52831
SLF1	424.552	-0.451373	0.00703905	0.0286212	0.944685	1.00337	0.832275	0.61598	0.618839	0.901355	0.701378	0.741097
SMPD2	155.916	-0.656441	0.0103715	0.0392272	0.861203	0.859872	0.530426	0.599938	0.76444	0.6876	0.565297	0.539666
SNHG24	1394.34	0.443745	0.000516837	0.00305101	NA	NA	NA	NA	NA	NA	NA	NA
SNORA52	406.258	-0.421855	0.0133954	0.0483447	27.5514	25.1545	27.6862	24.1685	26.6159	14.3203	18.9373	20.7424
SNORA70	1113.94	-0.357684	0.00407144	0.0180507	75.2421	65.4742	73.6198	44.4142	70.3162	45.1884	58.6422	52.2071
SNORD113-1	193.102	0.646793	0.00556809	0.0236547	17.1053	15.5484	20.0046	24.5596	19.4518	18.8209	26.0489	25.5258
SNORD114-14	76.1852	1.05964	0.00632858	0.0262808	4.44968	5.61575	6.75832	8.42572	7.42286	7.8697	8.82963	12.5202
SNORD114-15	47.4298	1.24867	0.00713938	0.0289453	3.23233	2.78716	3.84212	6.69288	5.01238	6.99206	7.59759	6.80422
SNORD114-21	544.732	0.464583	0.0118174	0.0435571	41.5987	55.6503	65.4441	46.0828	55.8989	59.8359	74.7988	61.8905
SNORD114-7	147.241	0.664062	0.0137331	0.0493457	10.7658	11.8907	11.6056	14.8946	12.9281	15.3252	19.4938	16.9799
SNX33	4615.62	0.484129	2.9709e-07	3.60402e-06	9.81759	8.26116	10.4177	9.44245	8.519	8.36272	12.8522	12.6584
SP110	1193.44	0.379888	0.000921839	0.00504969	2.61415	2.44999	3.16661	2.33116	3.07269	2.8914	3.45034	3.20773
SPATA2L	205.185	0.698562	0.00744568	0.0299686	0.631362	0.391998	0.793063	0.722064	0.750827	0.518362	0.789318	0.868605
SPATA5	1098.52	-0.361782	0.0018052	0.00899522	1.13087	1.1414	1.05153	0.949039	0.914373	1.08663	0.885971	0.90261
SPCS3	23170.7	0.509189	4.90606e-09	7.97704e-08	30.7071	32.3399	36.3088	30.2421	36.8965	38.2165	48.2834	42.5118
SPDL1	752.163	-0.498166	0.000242285	0.00157981	1.2186	1.31424	1.29185	1.01868	0.943368	1.14417	0.922101	0.894943
SPEG	1720.9	0.632503	3.73678e-06	3.62869e-05	1.02001	0.744568	1.1584	1.05848	1.01217	0.897196	1.30401	1.44738
SPRED3	356.075	-0.511549	0.00388399	0.0173416	0.622909	0.599893	0.448519	0.464796	0.475519	0.48562	0.446487	0.420785
SPSB3	733.792	0.44269	0.00804379	0.0319158	3.47768	2.44322	4.15746	3.65058	4.46987	3.54802	3.8249	4.25342
SQRDL	2907.87	0.343905	0.000107402	0.000761527	NA	NA	NA	NA	NA	NA	NA	NA
SRFBP1	715.402	-0.456253	0.000842607	0.00467807	2.19546	2.2259	1.73139	1.74388	2.06234	2.1881	1.70383	1.55878
SSNA1	1014.32	0.375486	0.00903457	0.0349567	8.20726	6.07755	9.9627	8.97722	9.66035	8.74536	9.3012	9.33244
SSR1	6977.28	-0.417133	6.17782e-07	7.06497e-06	6.05768	6.30951	4.81811	5.37725	6.0754	6.09862	4.83476	4.53688
SSR4	3204.34	0.41454	0.000155495	0.00106124	19.5634	15.4079	22.07	18.9841	22.892	19.3975	23.4355	23.5392
ST3GAL5	698.416	-0.428903	0.00207073	0.0101172	2.46191	2.50055	2.03924	2.06727	2.58831	2.85859	1.77525	1.95182
STAM	2579.41	0.343044	0.000192084	0.00128348	4.20167	3.93692	4.95729	4.51901	4.71417	4.98175	5.29448	5.13469
STAM2	3729.41	-0.350555	0.00014788	0.00101272	5.51323	5.59891	4.79772	4.20215	5.12691	5.14435	4.64305	4.17545
STC1	4716.05	-0.546141	2.77122e-10	5.29058e-09	11.0745	10.8174	11.6659	10.6969	10.5422	10.7928	7.93073	7.2306
STK10	3471.43	0.33349	0.000314005	0.0019723	4.07312	3.67349	4.67719	4.03394	3.7018	3.49739	4.76632	5.08622
STK32A	17.7344	-2.56825	0.00148292	0.00760263	0.0469866	0.0397591	0.0119893	0.0125424	0.0408028	0.0485524	0.00858647	0.00623263
STK36	1336.42	-0.324636	0.00315011	0.0144686	2.24633	2.31638	1.94942	1.96384	2.28568	2.32916	1.8459	1.84118
STRBP	230.658	0.575074	0.0134662	0.0485626	0.249188	0.17871	0.298651	0.262495	0.340748	0.301997	0.307032	0.331541
STX11	413.599	1.16849	1.10305e-11	2.53738e-10	0.375266	0.328376	0.517099	0.367891	0.468069	0.421491	0.779913	0.812797
STXBP5-AS1	283.324	0.529595	0.00714257	0.0289499	0.558668	0.584046	0.719272	0.478836	0.443237	0.481693	0.850772	0.820763
STXBP6	1767.87	0.632445	5.48847e-09	8.84204e-08	2.09726	2.13147	2.71491	2.21382	2.24915	2.52942	3.51964	3.11638
SUCO	4616.02	-0.445298	1.81453e-07	2.27945e-06	6.52897	6.67945	5.72948	6.00288	5.62217	5.79814	5.04101	4.77345
SUSD6	1242.47	-0.503974	5.23677e-06	4.94131e-05	2.07036	2.02671	1.47869	1.72915	1.90938	1.8198	1.45669	1.46394
SYNE1	22709.2	0.49869	4.61276e-12	1.10079e-10	5.10103	5.13005	6.11614	5.68985	4.28659	4.34791	7.30582	7.31119
SYNGR1	1017.52	0.59671	7.83614e-06	7.12155e-05	1.28335	1.01709	1.46317	1.40516	1.4644	1.22432	1.77282	1.72826
SYNPO2	7424.76	0.759618	4.79483e-23	3.29809e-21	3.04011	2.9155	3.21989	3.41839	2.92192	3.39487	5.09284	5.09733
SYTL3	501.713	0.58602	0.000160966	0.00109432	1.02692	0.926313	1.2332	1.07716	0.917764	1.03151	1.49808	1.45978
TACC3	800.471	-0.472646	0.00106771	0.00572929	2.78908	2.19721	2.09617	1.94811	1.67711	2.17387	1.78357	1.83348
TARBP2	870.661	0.367694	0.00701789	0.02856	3.20724	2.60799	3.88786	3.59156	3.89938	3.74094	3.86759	3.68839
TBC1D32	561.498	-0.383637	0.00897663	0.0347764	0.791625	0.790947	0.64374	0.577701	0.801861	0.809161	0.623981	0.603299
TBPL1	662.072	-0.368278	0.00834332	0.0328305	3.07424	2.91577	2.46941	2.46111	2.59658	2.55223	2.44539	2.24564
TDP1	776.282	-0.335994	0.00962749	0.0368905	1.64374	1.5958	1.46206	1.09947	1.25348	1.73279	1.28157	1.31214
TEAD2	848.661	-0.420841	0.000965466	0.00526113	3.14172	3.18197	2.59354	3.12942	3.26674	2.70248	2.46726	2.31396
TEAD3	2578.13	0.329286	0.000296575	0.00187542	5.89811	5.68766	6.53931	6.6525	6.69152	6.57523	7.42232	7.29043
TENM1	2036	-0.735611	4.36432e-11	9.40708e-10	1.40311	1.58397	0.571267	0.963206	2.02218	1.86154	0.947563	0.870534
TENM4	52.0367	-1.23136	0.00903563	0.0349567	0.0530279	0.0292129	0.0281892	0.0174257	0.0211286	0.0162074	0.0173845	0.017585
TERC	470.422	0.693892	0.000993075	0.00539274	7.52227	4.65104	9.95998	7.83187	11.4418	7.5147	8.97897	10.7264
THAP9-AS1	925.317	0.326715	0.00902492	0.0349345	2.63719	2.7494	3.05727	2.75263	2.87605	2.99063	3.52228	3.32037
TIAL1	2492.77	-0.373175	0.000221279	0.00145843	4.42157	4.5895	3.9371	3.753	4.6926	4.34755	3.7233	3.3201
TIMM10	397.569	-0.456914	0.0080128	0.0318154	5.12228	5.21635	4.03385	4.5266	4.4307	4.24934	4.03552	3.59364
TMEM101	810.814	-0.409578	0.00132132	0.00687343	3.48744	3.38868	3.34748	2.89467	3.02634	2.96233	2.64798	2.58549
TMEM120B	1444.73	-0.340167	0.00138265	0.00714072	1.68073	1.58012	1.22532	1.41623	1.65547	1.68182	1.28785	1.31387
TMEM133	194.765	-0.586734	0.0113535	0.0422131	0.946197	0.963142	0.59281	0.779509	0.942052	0.889873	0.62631	0.659641
TMEM170A	623.383	-0.422889	0.00332273	0.0151428	1.06451	1.06925	0.882225	0.768765	0.88792	0.905548	0.846508	0.764747
TMEM187	273.967	0.526285	0.0113729	0.0422516	1.14924	0.902191	1.37459	1.08577	1.21129	1.20266	1.463	1.50459
TMEM189	1404.87	0.34699	0.00247279	0.0117741	4.22997	3.60197	4.80615	4.22781	3.53125	3.60544	5.10834	4.93508
TMEM222	1311.6	0.322344	0.00581025	0.0244907	5.11545	4.43071	6.44109	5.4644	4.78787	4.81202	5.82823	6.20397
TMEM47	11012.7	0.608922	3.16594e-11	6.95218e-10	15.9369	16.6632	21.297	18.2305	18.9825	20.3395	27.0001	23.3141
TMEM5	779.072	0.342319	0.00858632	0.0335795	2.28419	2.26504	2.8443	2.47929	2.56531	2.79857	2.98394	2.85066
TMEM69	730.892	-0.335371	0.0117686	0.0434113	4.17166	4.22861	3.65946	2.9547	3.3765	4.03032	3.40368	3.33365
TMPO-AS1	64.2969	-1.00077	0.0111405	0.0415754	0.19571	0.214937	0.155338	0.0871341	0.0734245	0.126848	0.103352	0.104679
TMUB1	434.003	0.596403	0.00286627	0.0133708	1.66652	1.11212	1.90196	1.65847	2.22149	1.46372	1.96945	2.23848
TNRC6A	7212.72	0.375151	4.42883e-06	4.21325e-05	5.56128	5.73865	6.3528	6.59861	7.2331	6.87845	7.27103	7.55288
TOB2	2069.28	-0.371465	0.000261658	0.00168653	4.07429	3.68467	3.31054	2.95842	4.09619	4.24537	3.15554	2.90227
TOLLIP	1463.21	0.378908	0.0069051	0.028191	2.89511	2.11176	3.17679	2.84434	2.90694	2.73296	3.1082	3.43982
TOM1	1696.99	0.359684	0.00327175	0.0149435	5.03448	3.91858	5.80152	5.11724	6.02375	5.33489	5.76213	5.80532
TOPBP1	2085.27	-0.350659	0.000378104	0.00232802	3.25137	3.37341	2.97317	2.79006	2.68592	3.04299	2.60785	2.6491
TOX2	676.669	-0.463674	0.00128543	0.00671274	2.27192	1.94805	1.46184	1.75451	1.68757	1.69031	1.48508	1.59821
TP53I13	666.604	0.593806	0.000322934	0.00202205	2.57094	1.85836	2.71597	2.52502	3.6905	2.82541	3.21692	3.49353
TP53RK	654.025	-0.680079	9.13827e-07	1.01607e-05	1.85776	1.76396	1.40183	1.39446	1.52069	1.61897	1.13975	1.14384
TP53TG1	617.706	0.365102	0.00998403	0.0380488	5.78419	5.75895	6.32279	5.81437	7.18	6.73262	7.44757	7.58854
TPRKB	424.346	-0.415448	0.0125578	0.0458836	3.3634	3.51431	3.30346	2.68947	3.10039	3.47727	2.69615	2.52815
TRAM1L1	216.685	-0.576612	0.0108227	0.0406705	0.900833	1.03484	0.811957	0.66298	0.790062	0.908999	0.674675	0.643171
TRIM22	6342.89	0.420009	2.34559e-07	2.8973e-06	13.2933	13.3142	15.0413	12.4829	17.633	14.5813	18.5528	17.4534
TRIM23	1208.8	-0.383478	0.00190352	0.00939508	2.60709	2.70786	2.63697	2.27624	2.1682	2.17374	2.22668	1.9005
TRIM65	973.215	-0.329523	0.00900213	0.0348655	2.57939	2.20771	2.06239	1.83592	2.52409	2.39296	1.92425	1.91664
TRIP10	2230.88	0.322059	0.0006922	0.00395801	6.95781	6.5312	7.55577	8.05948	7.8267	7.5433	8.64354	8.39244
TRIP6	3140.09	0.418896	0.000481951	0.00287409	13.2984	10.0262	14.4699	12.404	14.3205	13.5247	15.1301	16.2763
TRMT12	367.248	-0.559691	0.00279094	0.0130585	1.39846	1.58442	1.18426	1.16758	1.17146	1.36384	1.11276	0.942418
TRMT61A	620.137	0.677723	0.000483664	0.00288308	1.3885	0.85888	1.85452	1.37094	1.65663	1.43453	1.7019	1.89897
TRNP1	3831.9	0.515145	3.35533e-09	5.605e-08	12.0566	12.4683	16.0399	11.7279	11.7536	12.6426	17.8616	17.6056
TRPM4	1675.71	0.375892	0.00799819	0.0317664	3.13846	2.25755	3.35297	3.25037	3.48838	3.07708	3.29463	3.74805
TSGA10	40.0777	1.25938	0.0123782	0.0453383	0.0468699	0.0464769	0.0925437	0.104261	0.117097	0.0847059	0.120943	0.105346
TSN	2380.83	-0.334683	0.00185273	0.0091864	5.54117	5.90193	5.40407	5.24831	4.94564	5.45922	4.92601	4.26439
TSPYL4	672.425	-0.514311	0.000181886	0.00122175	1.47582	1.42752	1.05876	1.31077	1.08247	1.1948	1.05568	0.999639
TTC39B	956.469	-0.35686	0.0051023	0.0219685	2.19714	2.36467	1.59415	1.95017	2.31986	2.38069	1.88182	1.72824
TTN	98.6221	0.902321	0.00713338	0.0289293	0.00452567	0.00440305	0.0078594	0.00585383	0.00317794	0.00310459	0.00715202	0.00968434
TULP4	2157.75	-0.32875	0.00057733	0.00336984	1.67004	1.6065	1.32809	1.49199	1.65598	1.60903	1.34746	1.28975
TXLNA	5575.22	-0.457329	4.17172e-08	5.83625e-07	10.3921	10.0058	9.83434	9.09087	9.27541	10.1142	7.81145	7.20838
UBALD1	188.56	0.80448	0.00165526	0.00835487	0.882703	0.602208	1.17122	1.22097	1.1498	1.00671	1.30122	1.29265
UBE2E3	2219.37	-0.407334	1.82802e-05	0.000155365	9.14538	9.14734	8.47294	7.77102	7.24582	8.03083	6.91645	7.03122
UBE4A	4641.54	-0.3897	3.11353e-06	3.06806e-05	6.50659	6.51555	5.35075	5.08091	6.02331	6.00573	5.15144	4.9018
UBXN7	1743.32	-0.464196	3.72692e-06	3.62413e-05	3.28526	3.1922	2.5711	3.18214	2.87748	2.77609	2.35699	2.38867
ULK2	1256.78	0.381525	0.00106047	0.00569915	0.865807	0.941913	0.93527	0.986936	1.16145	1.07074	1.21292	1.17381
UMAD1	476.923	0.440079	0.00574595	0.0242561	1.28185	1.22133	1.53528	1.51336	1.35673	1.42891	1.80025	1.63286
UPRT	416.023	-0.454343	0.0136116	0.0490117	1.2644	1.5106	1.11407	1.1252	1.25792	1.35915	1.11644	0.942153
USP18	852.657	0.449677	0.00396889	0.0176518	3.13807	2.25602	3.94552	1.74464	3.18204	2.61776	3.86413	3.54142
USP37	1261	-0.354674	0.00175146	0.00878047	1.31683	1.3526	1.19323	0.983155	1.04894	1.11015	1.09253	1.02085
USP40	2248.32	-0.325454	0.000521128	0.00307376	3.41425	3.33631	2.76012	2.76861	4.13752	3.89896	2.72686	2.71923
UTRN	18206.7	0.401429	8.28665e-08	1.09182e-06	9.4467	9.6819	9.85741	10.6202	10.6255	10.7887	12.9778	12.5765
UTS2B	130.753	0.769188	0.00821628	0.0324264	0.265198	0.339676	0.472021	0.379596	0.244175	0.285454	0.548995	0.502931
VCAM1	641.757	-0.442636	0.00428356	0.0188897	1.58516	1.90436	1.20332	1.93751	4.79547	2.30328	1.33266	1.2744
VDR	1637.76	0.532418	2.32151e-07	2.87009e-06	1.98364	1.94594	2.45719	2.47949	2.26434	2.33035	2.83108	2.91434
VRK1	500.425	-0.495884	0.00146507	0.00752226	2.54286	2.66485	2.22653	1.56579	1.89892	2.25357	1.91836	1.82252
WBSCR27	210.981	0.927312	0.00021521	0.00142043	NA	NA	NA	NA	NA	NA	NA	NA
WDR62	258.239	-0.602094	0.00474495	0.0206967	0.557258	0.440679	0.394765	0.308731	0.283699	0.42654	0.325039	0.33612
WFDC3	40.3818	1.38167	0.00793182	0.0315832	0.159649	0.1781	0.400093	0.354126	0.185676	0.210031	0.539429	0.357361
WFS1	3151.26	0.401746	0.000442489	0.00266366	6.36514	4.97439	7.82649	5.81728	6.2976	5.9694	7.24276	7.85046
WNK4	289.282	0.518709	0.0108355	0.0407079	0.484813	0.382073	0.633334	0.545504	0.370345	0.351894	0.609189	0.638338
WTIP	1297.58	0.398708	0.00574022	0.0242532	4.50915	3.22332	5.59856	4.30387	4.10343	3.68619	4.96394	5.28464
WWC2	7276.91	0.361311	2.03086e-05	0.000170234	5.36854	5.58976	6.20757	6.44276	6.621	6.54774	7.4061	6.8387
XAF1	4038.56	0.344523	0.00200007	0.00982665	8.43896	6.48707	9.38909	5.08545	10.3965	7.78448	9.67729	9.42453
XDH	403.643	0.742656	1.20685e-05	0.000106039	0.41888	0.383062	0.666429	0.449481	0.326132	0.442525	0.689724	0.664443
XRCC1	753.744	-0.345263	0.00888175	0.0344904	3.16146	2.92784	2.70801	2.79921	2.88923	2.61607	2.39277	2.44626
YPEL2	596.953	0.445356	0.0044613	0.0195995	0.669401	0.790495	0.908954	1.06733	0.955233	0.883157	1.04844	0.971421
ZAK	14834.6	0.373173	1.05811e-06	1.16119e-05	9.77564	10.0958	11.2468	12.2106	11.5577	12.3098	13.226	12.8087
ZBED5	1528.5	-0.457199	7.33654e-05	0.000540401	4.72512	5.04648	4.4586	4.13647	4.24788	4.54181	3.83344	3.37771
ZBTB10	1016.96	-0.546896	3.78549e-06	3.6709e-05	0.898926	0.893327	0.719463	0.730004	1.16972	1.03396	0.626437	0.614344
ZBTB26	243.536	-0.576934	0.0076693	0.030686	1.09924	0.8862	0.684114	0.754984	0.91466	0.709708	0.663471	0.67571
ZBTB6	736.271	-0.398893	0.00624043	0.0259608	1.46608	1.62175	1.39586	1.21172	1.47416	1.56788	1.27922	1.09652
ZBTB7B	721.556	-0.426925	0.00853585	0.0334287	1.78675	1.28578	1.27999	1.01014	1.91384	1.73516	1.12694	1.17051
ZC2HC1A	826.86	-0.48864	0.000488303	0.00290393	2.03792	2.32416	1.78385	1.68101	2.01671	2.02112	1.65836	1.49587
ZC3H12A	318.472	-0.611766	0.00270263	0.0126918	1.19737	0.895209	0.704709	0.744788	1.05824	0.842168	0.659363	0.716141
ZCWPW1	65.8989	0.98048	0.0128545	0.0467653	0.153571	0.120224	0.213607	0.254984	0.310212	0.278401	0.27387	0.268036
ZFAND2A	397.451	0.422518	0.0128679	0.0467777	2.89043	2.82593	3.78455	3.60451	3.27148	3.01981	3.76928	3.97362
ZFP37	250.715	-0.570526	0.00634993	0.0263435	0.737113	0.800226	0.594697	0.662575	0.647548	0.604968	0.517491	0.531488
ZGPAT	733.133	0.413867	0.00654322	0.0269857	2.56257	1.93917	3.23773	2.79608	2.6128	2.48775	3.04118	2.98828
ZKSCAN3	371.131	-0.556332	0.00134903	0.00700058	0.706832	0.677065	0.514557	0.545084	0.728592	0.670369	0.473869	0.476996
ZNF148	4289.63	-0.392347	3.32343e-05	0.000264668	3.7108	4.01735	3.19204	3.10981	3.89784	3.99761	3.10814	2.85364
ZNF254	1336.96	-0.327744	0.00312095	0.0143678	2.32654	2.41808	1.96709	2.14902	2.29067	2.21996	1.8914	1.93437
ZNF260	1257	-0.33263	0.00441422	0.019417	1.82866	1.97227	1.75116	2.01166	1.97224	1.76844	1.57614	1.48195
ZNF264	2330.54	-0.3233	0.00176621	0.00884493	1.65713	1.57274	1.61855	1.60157	1.32366	1.36574	1.39734	1.21278
ZNF282	1179.18	0.323615	0.0105442	0.0398053	2.34998	1.90226	2.75826	2.53048	2.49758	2.25097	2.7469	2.61355
ZNF300	658.586	-0.496244	0.000771557	0.00434449	1.68453	1.82822	1.5269	1.6641	1.4714	1.49969	1.18662	1.33432
ZNF318	1629.62	-0.512859	8.2579e-07	9.26998e-06	1.85827	1.77225	1.31068	1.5625	1.48913	1.47508	1.25171	1.31844
ZNF396	93.4813	0.900199	0.00892178	0.0346117	0.110676	0.131698	0.239821	0.204417	0.188788	0.164723	0.26218	0.199007
ZNF414	118.123	0.890957	0.0067772	0.0277658	0.518758	0.296367	0.671179	0.80816	0.680296	0.539232	0.721723	0.781564
ZNF439	662.592	-0.357899	0.0138499	0.0496705	2.203	2.21945	1.84713	2.08547	1.74754	1.87942	1.88301	1.61163
ZNF611	774.498	-0.406585	0.00187188	0.00926823	1.45024	1.39119	1.32353	1.33836	1.04729	1.19715	1.0575	1.10788
ZNF827	907.937	-0.37259	0.0024437	0.0116514	1.00587	0.986439	0.804692	0.931267	0.764025	0.826488	0.767847	0.787652
ZNF837	24.8838	1.8808	0.00427778	0.0188701	0.0441725	0.0356906	0.111818	0.108682	0.152218	0.0563513	0.138274	0.156249
ZP1	198.946	1.06116	5.75927e-06	5.38043e-05	0.521167	0.471641	0.922213	0.535661	0.843482	0.706815	1.08647	1.00341
