# Supplementary material for: Integrated analysis of H2A.Z isoforms function reveals a complex interplay in gene regulation
Source: eLife. 2020 Feb 28;9:e53375. doi: 10.7554/eLife.53375 (PMC7048395; doi:10.7554/eLife.53375)
Supplement: Supplementary file 6. [file elife-53375-supp6.xlsx]

## Sheet: 201901_ListC3_4_UpZ1_withRPKM
Table S6- Genes up-regulated upon H2A.Z.1 depletion in U2OS cells
Gene name	baseMean	Log2 Fold Change	pvalue	padj	si.Ctrl.n1 (RPKM)	si.Ctrl.n2 (RPKM)	si.Ctrl2.n1 (RPKM)	si.Ctrl2.n2 (RPKM)	si.Z1.n1 (RPKM)	si.Z1.n2 (RPKM)	si.Z2.n1 (RPKM)	si.Z2.n2 (RPKM)	si.Z1_2.n1 (RPKM)	si.Z1_2.n2 (RPKM)
AASDH	646.238575407621	0.4653321237552	0.00031926667927007	0.00200041238337815	3.0354200213682	3.20903268438529	2.82045102381723	3.23941389788818	4.15867751198578	4.13695892559618	3.0688067588458	3.49602959121938	3.73650197222213	3.10804043898207
ABCA10	41.4258493637492	1.57853456759041	6.71289317898967e-05	0.000517612537945816	0.0732114974502872	0.118786171505739	0.0555987009725877	0.0938419321934384	0.218302509380108	0.275463748448117	0.0785843784440433	0.068006120090044	0.226583534984817	0.203895484076896
ABCA12	57.8498444143667	1.7094379573815	7.98999402296662e-09	1.52850928002876e-07	0.0741998917328337	0.0936365486058315	0.0729226404877641	0.063405898902525	0.253596158540275	0.229779963822685	0.125859254498088	0.13593391580663	0.385971957908832	0.569970802403927
ABCA3	158.920124144492	0.6912016203157	0.0007929235909375	0.00435625841868656	0.473735759433717	0.454196135771001	0.422053057000614	0.367499309030678	0.658982582333716	0.695681998879618	0.436807080202495	0.455054691836098	0.707742934922515	0.7872672942962
ABCA4	56.6576788251662	0.953557394446131	0.00177116448375771	0.00858727216272072	0.126553444466285	0.109511390478684	0.107414770388141	0.164831602691399	0.238331284248257	0.243962014559099	0.135841010219587	0.127351711075561	0.104813755092203	0.107118333936735
ABCA6	8.90097306950982	2.06676555712475	0.00252939787532256	0.0115394772566826	0.013464501230472	0.0236667690018516	0.0156386785079729	0.0180937918062524	0.0824101518654872	0.0609810685711449	0.0313140546279732	0.00338735796111899	0.0915599565968816	0.0812476277499262
ABCA9	6.34947778728708	2.76340383752767	0.00113356777054183	0.00588459945467782	0.0056584667923012	0.0119351730170264	0.00657216643217142	0.00608314371724569	0.0500253410890252	0.0478377014033642	0	0.0028470794734306	0.0833693050280657	0.064271768113537
ABCC3	1927.77606556452	1.35274583892209	1.36140310904803e-08	2.48032022279004e-07	6.06408847183776	6.28241679397676	4.3367470727357	4.06496067280631	13.1009610222429	12.8381697104559	8.59977052513702	8.22947916689895	13.7684681611049	13.603895987866
ABCD2	22.5941837337236	1.24062706413818	0.00296791594230537	0.0131617696922926	0.0534042303063694	0.0563216814681022	0.0697811245463413	0.0717653783230951	0.14073279132776	0.149152622463371	0.110400787740787	0.0906880901659478	0.223188465628222	0.180082189823641
ABHD3	266.964333769364	0.711992065562203	0.000898073927236628	0.00484481461236441	1.81544924338337	2.30255734710666	1.51322951000549	1.9593553258717	3.02117898596116	3.04383204632815	2.82580163254093	3.08782028173289	3.17910015431994	3.02236289072823
ABLIM2	43.5139247773118	1.53657925268441	2.9709556865664e-05	0.000255716991898453	0.154407083402043	0.0986922902628393	0.114125411347947	0.0829977901940976	0.324564776585894	0.317869822000771	0.214009509301728	0.183632142446551	0.381812228454397	0.428493741830366
ACAA1	585.947281743532	0.327500334773551	0.0143994801815219	0.048214451029691	5.53561085615623	5.92948445474472	6.17937943347848	5.81603492780728	7.66333767174416	6.7180861692577	6.24111189495382	6.42822687800974	6.13142976582499	6.33094099801989
ACAD9	1096.4595298882	0.363938352236797	0.000807396783989593	0.00442748955403443	7.7308653426281	7.80009906147131	8.23407405196086	7.62835841072151	10.0477876182149	9.68906349378761	7.18040543269307	7.22533919316303	8.79849801745165	8.67622581477288
ACADL	110.846630952968	1.03082062965691	3.61278215405491e-06	3.93166206129052e-05	0.801857011431418	0.654381410537942	0.656924986835313	0.731192653298129	1.5190827672383	1.33159796062995	0.525416580320927	0.763687334450255	1.67151464538553	2.11433467529484
ACBD3	1097.06722757921	0.59516272926823	0.0105960176866265	0.0376782634374243	4.25547733082814	4.91512520813634	6.37140380027433	7.20902953185576	8.25686793572478	8.49136548384878	6.60048935441938	7.58337946071918	8.31972237308602	7.60395750449015
ACRBP	200.914096914588	1.34399053974608	5.20041000877002e-14	2.06364918793962e-12	1.50291248199048	1.63485924304964	1.48210890589346	1.46328312645296	3.4969015165564	4.02981180349708	1.39713740799421	1.04630925441648	2.6567598858695	2.09359491310346
ACTBL2	53.4226251328759	2.00766375077326	1.52260034777808e-10	3.84888027654261e-09	0.216935571721878	0.21532863330074	0.155625560929018	0.233216931123911	0.876498460833565	0.739769767565431	0.560579608340429	0.680594653822883	0.759285681585449	0.760961401982045
ACTG1P20	176.217793745564	0.91628690346018	3.10287142614295e-07	4.30468438245769e-06	1.06209122979069	1.18155362588429	1.00717335386415	1.17793586645277	2.0480034522925	2.02963636973846	1.06307200839581	1.00791014952897	1.41703878527994	1.51751624553309
ACTG1P4	15.5500785101621	1.87489558654151	0.000929492450174236	0.00498378803396831	0.0629293985900224	0.139055097828731	0.0835324673507052	0.0773169713814727	0.256775016805962	0.380011795943769	0.148676401241438	0.135699302285069	0.224151825160024	0.25528013797491
ACVR2B	1718.89476179626	0.504218391314435	3.51520612571225e-06	3.83732445656283e-05	2.61769888162068	2.86760415778742	2.96938806576725	2.9995252633874	3.95480487284062	3.97553886233972	2.60204781984087	2.95441709824914	3.60808862989983	3.33830462677556
ACYP2	156.459846056706	1.2464496389947	2.56013135054231e-10	6.27356804801181e-09	0.618247909179288	0.689742850607358	0.700275729623851	0.648169511372754	1.68873494347231	1.38845975560096	0.633760326014125	0.611864225763329	1.25082080000968	1.37835909407863
ADAM20	132.128507594906	0.671001983832014	0.0115451419074213	0.0404079966759744	0.919444106947303	1.06843594752313	0.660028409980476	0.761930091408045	1.26792518276076	1.38035046103983	1.12196233932891	1.06017510055309	1.62820624822177	1.63179964987042
ADAM32	449.356208332807	0.927444837203382	5.7093438589524e-08	9.29694357217027e-07	1.40120609030839	1.41460154852372	1.15705590969029	1.48881208780165	2.71433761221905	2.36289834802146	1.55636754520974	1.82747031068522	2.65786688224034	2.3836326858976
ADAMTS10	273.665699185935	0.658484596336219	0.00779325115253812	0.0294340962352284	1.17239892153176	0.936310311975727	1.31901000820041	1.10668330862924	2.12243699402708	1.38141776600641	1.35117004427943	1.09346771418765	2.15746365188552	2.40118346278824
ADAMTS12	4844.56135863796	0.408728979180737	0.000472688126610046	0.00279379137965193	8.54445219834603	9.81137839560569	9.9283887252807	10.182476004993	12.1679568768555	12.7566309366896	12.6407927399853	14.3775361984739	11.6597736039405	10.9777475237551
ADAMTS17	236.792906451629	1.42878551182833	8.23095138307637e-08	1.29598867219323e-06	0.384130064358738	0.429756959455327	0.687147496492817	0.557646223972754	1.39959288639527	1.30374289162023	0.449216755146808	0.409125499449905	0.797619036806702	0.927566685040809
ADAMTSL3	309.53929683998	0.566751526602646	0.00797343279406354	0.0299667048631838	0.630443403642231	0.702390559808597	0.912488812790555	0.891514002198644	1.05865808800144	1.20654483615294	0.902280921162928	0.961390426858264	1.64338000443177	1.40119524644266
ADCY10P1	367.783660161729	0.621822714694977	2.41791663109182e-05	0.000213006365616033	1.4397379871207	1.60754598948151	1.45922664279865	1.3842047740841	2.21294735663775	2.21005678358	1.80676482874362	1.93961199266154	2.58688439419817	2.16049464112121
ADM2	408.732360301456	1.85953391638261	9.07790414148452e-30	1.61559184917996e-27	1.19377229659453	1.15640341299047	1.28383000648289	1.02669344363478	4.33581683263897	3.93014920662117	1.20650235873493	0.965491112195611	2.20983770244765	2.71189560859418
AEBP2	2327.47894010635	0.535455773006589	0.000561492072913495	0.00322035443771578	8.10457706577279	8.14154460077003	6.42882993821846	7.38611078031454	10.8854250260889	10.414817418979	8.51995372322041	9.31108929824828	11.7634756428555	10.4826961875169
AES	2713.54090545229	0.476027437131487	0.00938965526829542	0.0343015418146583	30.4884816097008	28.6028847700615	25.1920035278078	22.1832010748222	37.9739118174325	34.4840713756549	33.486494699875	27.9017041363996	35.6043669409285	36.383785241808
AFG3L1P	332.632535455274	1.03803602876549	6.55229768746706e-08	1.05525532866071e-06	1.10077041010093	1.43868730381617	1.5862099649045	1.32578400100417	2.76450669149701	2.69198737221895	1.04809149072689	1.00199836334481	2.66594380413142	2.60697727989888
AGAP11	37.0745642404075	1.51526935594071	5.55813467475341e-05	0.000439339501276269	0.135609505895239	0.222472129429259	0.137818642546966	0.133638280249133	0.461113749899229	0.409452601144575	0.134330071002788	0.142150933138559	0.307386072987058	0.248697875146302
AGAP4	231.743893951842	0.713424369247861	1.22289741439949e-05	0.000116638930583915	1.35332640386884	1.38400782480393	1.44324820207051	1.50780099934769	2.43472992495532	2.12480656539443	1.30982601264503	1.42995598103586	1.72203068127243	1.54591150634837
AGAP5	200.972279667806	0.780718803567174	6.38261168439881e-05	0.00049430872645021	1.31534745820979	1.33295613468763	1.57041727262915	1.55626299397896	2.1588334589264	2.68020426557133	1.25325059522342	1.45674823129884	2.0154261179784	2.05534709769243
AGAP6	429.459645216333	0.826948364383176	4.77755139981593e-09	9.53291937863612e-08	2.68819835677582	2.72201311679477	2.60687518407289	2.61340149288853	4.30356198544118	4.90103586833589	2.65231097044207	2.86694637756284	3.39652647071731	3.67064658132949
AGGF1	1256.17937292292	0.361294778307938	0.00482191207011107	0.0197575043635551	5.21206422165329	5.7553718250217	5.02942398564527	5.97735396169979	6.8846560470018	6.89659993103548	5.23612486122904	6.23184897857741	6.79450162385223	6.42320616197047
AGO3	1254.359587321	0.490450228382031	0.000191080528758573	0.00128399993752757	6.5047762707168	6.87732283313064	6.27700944601768	6.50924582170205	8.26190599047841	9.68719546795729	6.41012491500558	6.81649798367335	7.99300418904522	7.30513004542753
AHCTF1	3555.82387071215	0.458974374291545	0.000470749332724631	0.0027842002327208	7.31124766640324	7.91299454158452	6.66247278756985	7.87251092527634	9.55012529822152	10.4270177562417	7.93299706556098	8.49423459153753	9.32858937368328	8.39283574038453
AIG1	783.249808015984	0.500084166152656	0.0140544522486729	0.0472972923760088	2.64145566265707	2.60692837234549	3.58879739643542	3.73900730744694	4.27434219931425	4.40073557050294	2.27070323444848	2.46473072190996	3.18587104102608	2.80341945813385
AK3	1331.51500274755	0.956927845545869	0.00308894936207433	0.0136299020311514	3.24372710690413	3.27042591112873	5.95364693810363	6.52653013816126	8.71356503760336	9.23263053513366	5.43787475923106	5.85302622787234	9.49450205049895	8.72907289793561
AK8	21.4684360458202	1.44392590852099	0.00882420197520502	0.0325803886423171	0.0963249690497989	0.174149421490429	0.127861738908876	0.0591738920298959	0.23395308776085	0.365625949381769	0.099564701159417	0.0969325622034761	0.202744110761035	0.146532375609102
AKAP3	70.6500938590137	1.53178369058716	5.95247185089624e-09	1.16013939757678e-07	0.240184126739977	0.262686964202587	0.285167088577718	0.332804421649278	0.769512332229537	0.812224014635742	0.336533374314521	0.359863173670591	0.604917078514327	0.598673960699632
AKAP9	2980.36572562087	0.33512469868764	0.00331097404234011	0.0144559461703277	4.62446359632717	4.72272264899585	4.60032376186117	5.04227331284583	5.47466669467335	6.22088644622307	4.24921729681823	4.72416493261388	5.23951478176421	5.13816055291159
AKIRIN1	2153.38914051531	0.398216144549695	0.00270299838103039	0.0121894365178844	14.6814432015519	15.0351875360435	15.2367770914085	16.7253860766446	18.047305969743	21.6251605233632	14.0463816262188	15.9915106609939	16.5502738566292	16.2859644325357
AKIRIN2	329.532585202807	0.344556210277137	0.0140557706385596	0.0472972923760088	3.23875614380428	3.3475689262445	3.57954133285803	3.34295353144851	4.24195213729329	4.13445753021679	3.34768638668742	3.55631909569307	3.34645638465897	2.92151072809904
AKR1C8P	112.472016833264	1.30443658864241	8.40609225344946e-07	1.07013684547345e-05	0.906873033379966	0.827169846162605	0.58833539934119	0.658740064660262	1.75573322018994	1.84517944459427	1.39339410816316	1.24145582588222	1.13891858017991	1.34559073277022
AKTIP	487.302633040408	0.539795838801475	0.00025739441403528	0.00166423199298627	3.92605766424418	3.58397259255566	3.30663072408084	3.72460884476985	4.97297987972929	5.3590159822246	2.83260073709288	3.05063488427352	3.37139488131286	3.20545844934588
ALB	4.4621011602979	3.54770245394003	0.00716236455085224	0.027505165872159	0	0.0107356923883346	0.026602497230693	0	0.103841104991582	0.101427926643272	0.015782939168189	0.00768284700731742	0.0259583260244692	0.0216796793834795
ALDH1L2	566.814548801914	3.39973395815227	5.23535766064771e-25	5.98972510538649e-23	0.482385982802171	0.518713796176515	0.241689045008746	0.305052833763351	3.69540865099471	4.29522422678327	0.366625178648243	0.399764852637018	2.20292842647502	1.84318253063225
ALG11	182.67760681056	0.978861221344543	1.25309569203438e-05	0.000119084644001908	1.16066625265778	1.38777135485384	0.992900613013799	1.10581354916765	1.99457913500108	2.46780993660606	1.14223253611651	1.16798743714167	1.74079334243495	1.71700525082142
ALG14	157.771451270339	0.880546512380172	0.00174544177538191	0.00847655420078662	3.06350633480736	2.74967185302682	1.83587221519373	2.04963298071148	4.61001351666469	4.13288880085829	3.48656523411715	3.18121834172278	3.80445289489029	3.47043313714063
ALG5	288.202128224619	0.615802502158386	0.000659307411717561	0.0037018283260203	3.92399744516216	4.00920139735504	4.3015777467668	5.19807639613278	6.27660838984156	6.76263460385878	3.66101082968295	4.27411409995293	4.43060617671285	4.42369121533801
ALG8	1379.07090499357	0.427573194658613	0.000232365166467083	0.00152591944389994	15.1473244123716	15.9208839882528	14.3026705994524	15.8773261859022	19.4475980640948	20.7768809812577	16.3333725673206	17.4865873481265	16.309439015655	15.9446392408911
ALG9	1703.27074041132	0.748489961156931	1.16865752220414e-07	1.78737646560023e-06	3.91043862832856	4.45692309770623	4.6909934914148	4.94004115154863	6.96666312074246	7.7851796084842	5.7118255566881	6.15028329127786	7.55422988935743	7.51165923412752
ALKBH6	236.480053104348	0.660002179778634	0.000124356782818952	0.000882417300236452	4.18766312043121	3.50003827883081	4.21925644756991	4.21267171463729	6.54208757777628	5.93101105865489	4.67617963944672	3.67250958903085	5.33696652666603	5.25323174494972
ALMS1	5935.04803441754	0.613841403183837	8.2198660081461e-05	0.00061418922475626	8.72936794219406	9.38322771946387	7.39154244717846	8.14936431484559	11.7698288703647	13.3996439238942	9.21400356656685	10.1612918426486	12.4539345280534	11.8065898511412
ALMS1P1	108.104384777975	0.920570888049781	0.000248657048285749	0.00161842945465335	1.0078077679793	1.41715185641238	1.06649500518442	1.03529221619453	1.90380794719963	2.25852631652072	1.06485269852712	1.04797025243343	1.75137173259311	2.1145517685102
ALPK1	282.45399505083	1.02404618721736	0.000604390763371482	0.00344397181754274	1.09030614878917	0.954171359148707	0.677179052288696	0.619709026091453	1.45606833980944	1.86978562948766	0.830762357879158	0.981167135546473	1.16850039212943	1.15517800129572
AMFR	3938.22376323555	0.414190612657772	0.000264805393911664	0.00170539128995609	18.868990350658	19.0279570896071	21.6639498870838	21.4104005934184	27.0108263531952	25.6701837626862	17.0717574505287	17.6642591955162	22.4164894530225	20.8459492113677
AMY2B	95.011242513969	1.01148867065555	0.0125082608458108	0.0431341719381532	0.882603460675775	0.928024470705253	0.443295850374082	0.470148053285031	1.54652382525487	1.14278123577702	0.624629880639345	0.640123024516902	1.1625092437497	1.45634358284897
ANAPC10	160.309617328956	0.578988869911656	0.0069812827753352	0.0269625649317472	1.45787514901185	1.46259047855804	1.14866131036275	1.61311821783268	1.98288835995045	2.16230528366282	1.46284673624623	1.62149958251281	1.92283206793559	1.87623576299996
ANAPC16	1744.06701970296	0.377067444696048	0.000517275915446101	0.00301185867622104	8.96594685747132	9.55935348560436	9.52028763670958	10.3315642468465	11.8958583427293	12.4332077779749	8.1316519555073	8.93202540577953	10.7219984365326	9.32586124109812
ANKAR	299.045989111387	0.592372776430483	0.0108500605053316	0.0384410247422961	1.23933172240659	1.51565075657727	0.933065321233391	1.31064609893957	1.75702159532858	1.9209625788979	1.33108684143038	1.36902035684399	1.89414660209799	1.97169221784262
ANKDD1B	50.5242498882536	1.95550795540579	1.02859833626161e-06	1.27921343042625e-05	0.181623036974047	0.147342329898675	0.316425863416021	0.225293232145563	0.99761923653257	0.658060283540154	0.281597444230238	0.288212130973955	0.538357236959929	0.426478880975364
ANKFN1	4.81949187365124	3.32139278555895	0.00372754078597692	0.0159989137900432	0	0.0103329932921522	0.0256046294450405	0.00789981215217747	0.119935192162578	0.0887484856149446	0.0151909163057384	0.0443679664354976	0.0416410354954215	0.0417329359937548
ANKH	971.768672517965	0.481310480922956	4.80009529723239e-05	0.000387061231313215	2.36114884816383	2.2419636685077	2.28072033038609	2.13903849903292	3.10804638873428	3.04841045364148	2.2856415188839	2.33451080905423	2.64400432236317	2.61838196691851
ANKHD1	140.344962088921	0.493700073806877	0.0105473882451856	0.0375498956338502	0.318188764066298	0.284457778459701	0.330408675711001	0.326211817552043	0.458570175234694	0.409738959839229	0.337602852154067	0.335039331726905	0.408383380877864	0.3979156519466
ANKK1	68.3785908728663	1.51927113108298	0.00547502278844863	0.0219886999110272	0.175255599971932	0.197151724158562	0.521100692902708	0.542617376423572	1.2871927770732	0.719654943714421	0.289840054720577	0.162252181882809	0.810393827401734	0.557380038573295
ANKRD11	4528.72826334003	0.763055765196042	6.54173383077966e-05	0.000505742906382215	6.85694136808298	6.34616469304897	9.29287753388961	8.62018802732527	13.274386804233	12.4874953514547	8.07686152017465	7.03552556006966	9.04212056132312	10.1472241680639
ANKRD12	2106.73866805872	0.474653259717324	0.00228076471587176	0.0106028478968192	3.28686743571002	3.20707912309162	3.26536898920857	4.0991182554435	4.3975274040047	4.99961306589442	3.37046478740926	3.79378496078533	4.74207524668748	4.37275570557225
ANKRD19P	6.69605396414591	2.88335817398616	0.000536924860491	0.00310880023561976	0.0154547027560858	0.0217319824245871	0.0269253710592406	0.0166146027578522	0.157652132740796	0.13065685155726	0.0159744962972351	0.015552187049923	0.21894484636301	0.16457103823285
ANKRD20A8P	2556.52078718495	0.694232811060624	0.0140715900028487	0.0473414825778481	14.8056389290555	16.0447848000441	8.79001114899682	10.0837894841862	19.0605724182062	20.3335983997011	11.9848092615914	13.1197487175584	16.9726546027774	15.9245662930818
ANKRD20A9P	16.8838662651423	1.49498906560154	0.00461819691538018	0.0190870306010048	0.0376097038589555	0.0226653180169631	0.0499231111381701	0.0259922390793615	0.0913460594316397	0.097334460263045	0.0610887270245532	0.0702871672414468	0.0913391972078595	0.137311170055401
ANKRD24	62.111204153079	1.07719191927805	0.0125380015309961	0.0431880838660059	0.212542469498002	0.130756253418277	0.385722994496201	0.242775002071612	0.560099730612197	0.44387028232623	0.251729255175692	0.191603639783832	0.291069390088911	0.289197014726718
ANKRD26	971.184181831288	0.379867863504858	0.00544988892113987	0.0219077328089353	2.69285257711232	2.78819186634871	2.62065403092331	3.14091357079124	3.38004405143532	3.76043266122727	2.87855875293015	3.06709248506533	3.65398827228737	3.804681393736
ANKRD31	96.1668413975933	0.644043440026451	0.00535453429128962	0.0215637804978816	0.292391146998898	0.328091367861851	0.27785858812277	0.2603587526602	0.421789975419337	0.460142371887663	0.225905737149717	0.255598493628133	0.24100473664865	0.268374029743802
ANKRD46	364.103786987794	1.2713841854064	7.91871811735407e-18	4.69141511105248e-16	1.26455916300706	1.10270791566361	1.31615579343562	1.23146463713725	2.94849427733814	2.85617235915865	1.76117717957789	1.64438051803554	2.40105548087225	2.43666714286705
AP3B2	25.5011681710123	2.8769954462636	1.76106252007246e-05	0.000160934442640855	0.0141222600706192	0.0330972296366004	0.0437403968197646	0.096153668165426	0.403367989167856	0.267210980374629	0.0583889563629068	0.0615824718529497	0.165389792208538	0.173775196114476
AP3M1	1971.26140265786	0.528150755159355	1.01669902046401e-05	9.91872649034073e-05	6.08277700931433	6.56099849116036	6.30738130243829	7.0224489461686	8.65111662388992	9.63062457440898	9.26813175573647	10.3202075185951	10.3037330567907	9.95691083743646
AP4S1	202.681065717911	0.525143769267536	0.0049497500253679	0.0202201821694776	0.682292252135548	0.574859568303079	0.543591857851701	0.609228815517585	0.874314842249226	0.824031724128563	0.556615066022836	0.723479231271861	0.683805995633245	0.756568694221117
APBB3	585.191811081738	0.365089183853956	0.00521691888853646	0.0211097162472439	4.91522927680317	5.41316693450913	5.66094073368307	5.37293386937694	6.98867959483894	6.44514697227983	4.43160138439698	4.43082745931044	5.88899950680079	5.92310841914143
APLF	172.944470106333	0.979398467160055	0.0123893034384373	0.0428434028031063	0.958739652697584	0.976922904394434	0.392701884944815	0.592524907628143	1.34809981172366	1.47115890529457	0.971835811953421	1.02537763254325	1.55376778514524	1.25601608337764
APLN	22.9471498751967	3.36973556717584	0.000260515856791076	0.00168132926036702	0	0.015550770301961	0.0513786857185014	0.0832224627594775	0.360996000231282	0.394011344293098	0.0571544090535381	0.0445147587148541	0.0564013876555232	0.0706573297524537
APOBEC3H	24.3221554308859	1.83448942000076	4.4660153849958e-05	0.000363113636678546	0.249546801457847	0.307042680817722	0.253612025217659	0.184439533764661	0.700041674989184	1.01718343040247	0.161212436385483	0.0627802196398467	0.512618269684145	0.797197659219285
APOM	28.0898289237185	1.75690192073171	0.000168262164379109	0.00115175255407751	0.0643675025856096	0.0550941576412334	0.0292543945213508	0.0631811349929095	0.140837555192272	0.209557884117976	0.0318198424281739	0.0366111178818085	0.133214706081617	0.0993368354796401
ARAP2	3367.83286629517	0.443565193750898	9.90143868274351e-05	0.000722075530427392	8.5914418207289	9.08802900960684	8.17874421107974	9.40024637317986	11.3362976051983	12.0783048329348	9.9591643173576	11.3163264611693	10.3244111449318	10.0563366088863
ARF4-AS1	33.442172578625	1.04506717635756	0.00242433194558523	0.0111481761898072	0.879943308934028	1.09986874121073	0.908472848755659	1.01605737505355	1.95039033397352	1.96804228612299	0.707419033009276	0.852697699843219	1.47745743490885	1.15681104571354
ARFGEF2	5261.33371042699	0.424406212895179	7.7555322702012e-05	0.000585955073193289	10.8696388231903	11.9520484821175	10.8978106866783	11.5534559704863	14.2643068401028	15.4065143444497	9.70035497665478	10.9262473930787	13.3154046342064	12.6133465378846
ARFIP2	1340.26891693224	0.368267313272048	0.000413473904615089	0.00249571658972705	6.53563948962412	6.87638404101223	7.17643749071587	6.83679239567926	8.5173060891802	8.76666125001315	6.48236212711869	6.7074690280499	7.7591389323591	7.30505421347781
ARHGAP18	1176.84730554495	1.2070238188045	0.00666203781489598	0.0259399876819121	2.58310626235395	2.93019355994436	7.02416675592685	7.78319114705927	11.8497272382292	10.9467135363018	3.62317463774111	3.94267943099293	6.2362300246267	5.67129012097355
ARHGAP23	3455.72256293364	0.958941951844565	0.0012735028024851	0.0064943113971013	3.43198418190616	3.47197672409256	6.52265290315722	5.83612466808446	9.41178694558292	8.8276026905798	4.79384396245673	4.10061877392759	6.57338786938712	7.65844952430399
ARHGAP25	171.201732402124	2.06651247461667	0.000462696601699646	0.00274394191361362	0.203826732787057	0.220473542011972	0.795202273566943	0.893352723749054	2.1396412496851	2.15871910075739	0.280909480181986	0.215631005055859	0.805562983712542	0.853347391739787
ARHGAP9	20.610369645126	1.76041826867851	0.00025395716172208	0.00164477832596708	0.0462438382078986	0.0455187787515767	0.0805665772161714	0.0845146699818685	0.213850721797191	0.212232046481725	0.043019256370881	0.0232677662283867	0.0733746370721918	0.0525261233311799
ARHGEF2	2797.24572148838	0.926427387709618	0.000202725817466155	0.00135091761646603	8.54582573692638	8.32479013298408	13.6461118747156	12.8540455933916	18.8844402628562	21.2845217973449	6.47141885076743	6.1790966656638	10.9378763158204	10.6588262419351
ARHGEF28	2992.41342825786	0.503960885694397	0.00719656281955719	0.0276122689881302	7.20421158952845	7.60740433471932	9.8946601369959	10.1832171672294	11.7098955843308	12.4160304142634	7.68434882200797	8.20341065457414	10.4156719525323	10.4231021547279
ARHGEF3	717.984369515133	1.28094688947973	0.00123210539508584	0.00631794672759528	1.23689945180274	1.41448636702728	3.0376882887938	3.12006093940255	5.2547613881106	5.15649288845823	1.74446006476988	1.95328156406414	3.55104655908471	2.9410512598115
ARHGEF37	37.2116521284504	1.16927750678301	0.00233389770802289	0.0108213009783303	0.0879440886124313	0.0875957470410976	0.148961225500403	0.141816648329408	0.274117038202342	0.23898060862282	0.178016306167822	0.258121550533614	0.382073833270056	0.416214194124765
ARL1	784.071395769989	0.844154435573215	0.000117282327521394	0.000836598108744716	4.73039792689436	4.75677959332247	3.15599244375523	3.83771948117478	7.18953069821926	7.28086989841511	5.0430045577752	5.7897754887819	6.18407793242811	5.68541397568484
ARL2BP	1427.61857098973	0.750474825373684	0.000198828679099764	0.00132896908082653	13.4466511488407	13.7753758822297	9.61331908854388	10.8966397484438	19.8593640889139	19.4183546017578	14.3025370526395	16.0002788849464	19.2132610254714	16.8378585120269
ARL9	35.9511788380563	1.26672704306187	0.00161522321472822	0.00796713824756341	0.639724867074579	0.89956369832875	0.445814576796662	0.550189787976532	1.33415946018491	1.62250490961925	0.506951404322722	0.772512104587443	0.821703151149366	0.787185009193206
ARMC10	990.35503199939	0.625922025364431	4.68354788161883e-06	4.9442438661619e-05	3.77377261834899	4.36716136261443	3.82427958181852	4.1852510486901	5.71151557091331	6.44998970454588	3.85959402378991	4.74597034259072	4.81332101072948	4.29096130202127
ARMC2	79.3454886207514	0.734531235042389	0.00237118611706182	0.0109480943911195	0.348332701533078	0.416008080047964	0.349157776152846	0.389865033557247	0.577616146515676	0.639687491897911	0.453759501085434	0.403349467884165	0.492126597547229	0.514892385357638
ARPC5L	586.27195229421	0.440314116104183	0.00333496283201665	0.0145311800493363	4.16128455019342	4.85633456238962	4.10988692825646	4.83117888787254	6.24701739264861	5.64969547651157	4.37439290367554	4.52225062680616	4.57181871407533	4.91349406813173
ARPP21	43.1644529418293	3.90067841627994	3.08993678854314e-10	7.48852768601673e-09	0.0389065901989195	0.0401202180989921	0.00602520306839984	0.0111537577658563	0.373951868128423	0.325790745156307	0.0991973686480205	0.0730837388823531	0.752550994926365	0.585545334374182
ARRDC1-AS1	384.112168645852	0.650746712500859	0.00315474823919339	0.0138819953112758	5.33079212211324	4.89999236341869	4.18132713754142	3.58489896262897	7.25052872697535	6.5775667262185	4.42476487291735	3.72722506901596	5.41394912288978	5.12773529961582
ARRDC3	1553.6748266848	0.727584793406426	0.00372917049998307	0.0160020104820267	6.52257647565781	6.22100433435254	4.25539849806102	4.18285449286327	8.93232889070924	8.24320322242535	3.66967041416137	3.84960747036662	8.76478386520782	7.92251710793214
ARSG	79.8539248730787	1.21252024462299	0.00369337420347712	0.0158832218918876	0.238194791106718	0.326128742577413	0.465949037289588	0.660395407720074	0.86961448578921	1.03715274880289	0.460016626230347	0.548780575000527	0.838290854374355	0.898879603973784
ARV1	179.521194086168	0.655665100827897	0.00335177315177329	0.0145706615250663	2.51675288882046	2.56750212841568	1.8627884739047	2.04249233169696	3.35597204367259	3.56108058396841	2.00205764164784	2.54504276209527	3.29979126621546	3.24051193829708
ASAH2B	256.833430684565	0.475111876176191	0.00276539017812694	0.0124041266671126	1.48906649891744	1.51347461773529	1.34113126792113	1.40423097019216	1.93292973629114	1.96878059038039	1.18271434462793	1.49320139637529	1.80014245263865	1.60975749490213
ASB16-AS1	595.722801482347	0.520847772691392	0.000191660713501897	0.00128688447706959	4.73702381642469	4.81817684207899	5.5752927765678	4.76152955790231	6.85098358454871	7.08462102717797	6.07146883094435	5.55344286346246	6.83615236611922	6.8826261149913
ASB3	58.6375719475942	0.799696302150608	0.0118173046614895	0.0411724522109519	0.341610354852316	0.453676340690142	0.382076557103235	0.265235211840355	0.593696225362625	0.626505100793192	0.340022085486428	0.362863208814376	0.437352042500032	0.502987025582643
ASB8	507.810679464095	0.462037721146858	0.00415424541324847	0.0175074889528183	3.55803846693188	3.64889781501032	2.95692646007941	3.22493384497531	4.36377414388318	4.64540602084871	2.70121256365955	3.6175211247703	4.06031334021647	3.79752484396854
ASH1L	5736.88741999785	0.388936307396666	0.000318962336044017	0.00199921643499094	9.29353862100319	9.91514684232434	9.05496752710371	9.85918698073065	11.6456776182986	12.7328056832616	9.87373046969016	10.6320253510988	11.2226657858294	10.3402440565501
ASIC4	19.6676330657569	1.54358355591488	0.00811331819943133	0.0304006534324693	0.0491609779500722	0.0864110366313725	0.15702289816623	0.066063234337065	0.292534102221202	0.215229608995305	0.146091476736917	0.0432871886710111	0.167149786327847	0.348997251709235
ASMTL-AS1	204.357926698424	0.554429904114736	0.00551862121573574	0.0221234555631509	0.714970817078733	0.610701480582349	0.662277559910394	0.536770895512073	0.904135242541474	0.909885244547119	0.58022049734563	0.683803941876006	0.606059944721663	0.889283633444648
ASNS	1901.14062973441	1.83903186649454	8.09481802484269e-08	1.27569408568608e-06	10.7695967672507	12.1568116054166	5.77888174699605	6.1151801625626	29.0463631809213	31.9972511158498	6.23702579747659	6.99539035853321	18.4525572384906	16.9942595224228
ASTL	10.2674998301206	1.62149591268849	0.0147694375597382	0.0490902420461013	0.123798608535729	0.0773698818727197	0.0958593071507225	0.103514359543424	0.411598577424196	0.199355394538755	0.0853082475873179	0.0415264994492736	0.109127787775193	0.0976505620378561
ATAD1	2095.4382419671	0.888370287842284	1.38617313809892e-07	2.0918177564295e-06	6.34959213468521	6.35927245114236	7.44266722082344	8.71205118510385	13.0212985455765	13.0424433119393	7.51312947777605	8.07421953285385	10.8626672565488	9.90071217278354
ATAD2	5267.60237831642	0.55809466906215	0.00924874651716556	0.0339133537743892	19.7269656212519	21.1752077850067	14.0778799305276	15.4931558908625	25.4496557172396	25.3187083785845	20.0957038845662	24.0879968063526	27.3868270750501	24.9789435675855
ATF1	721.62154271336	0.591913802464704	1.06560252815952e-05	0.00010349972956804	5.81423500878699	5.18368942693105	5.05035046727495	5.20245992463239	7.75319972472778	7.90736606841146	6.13483790553685	6.30924290554807	7.50097177357766	6.8102320592667
ATF4	8373.96432984075	1.03348103107566	5.07612901307083e-22	4.47181585406474e-20	69.1796640763957	66.7692538148908	62.974882967039	65.2761595053203	128.052808710556	136.203303507849	56.1160766990661	64.0934783882724	86.2293031001464	77.9684481239495
ATP11B	3428.93757772603	0.438244678724933	3.89688651306875e-05	0.000323254441966847	8.80634298620055	9.1470225754343	8.58207947887747	9.62436272918402	11.5437758994723	12.3799700008567	9.73940488274753	10.7710208899411	13.0692665368801	11.4764063159323
ATP13A2	2497.68098866535	0.933478906190047	0.000181186159031512	0.00122639989856942	8.57372779193777	8.39524501393759	13.1767634148153	10.8538100285509	22.5604182278203	15.6521618133948	9.79710322192889	7.12249361643224	14.0879497771882	15.6752936267057
ATP5S	483.739866665337	0.607065262871283	0.00946101227246743	0.0344835695549449	4.60551202124686	4.91728582568841	3.41779850680601	3.28617014423569	6.15319085442232	5.93636063737626	4.00211531891121	4.23262690682966	5.80167201886315	5.7056861729971
ATP6AP1L	72.4384297355207	1.95572286581048	6.97381313900868e-13	2.45252721948491e-11	0.372345687053752	0.39535811760024	0.29125538847841	0.302260417051899	1.26092138017698	1.3123805256848	0.400577858236102	0.428222111967957	1.1281987149751	1.10047937740053
ATP6V0A2	548.664093041917	0.491332882448027	0.00018680890565738	0.00125769434802345	1.56439348526665	1.5214696782639	1.64923146147588	1.64371407150946	2.05733502501477	2.3205809112033	1.67053398822265	1.69767897335749	2.49579852947284	2.15149522675402
ATP6V0B	1350.08930281224	0.383558078473304	0.000239378998097444	0.00156381852705928	12.3185601886113	12.4248248403918	13.5167185518137	12.9001946031944	16.5554255309162	16.0436748560425	10.1666970345165	10.8608262079941	12.0365628048213	11.5417297951838
ATP6V1G1	638.229756784068	0.616547534714199	5.55161944513972e-06	5.75715026509222e-05	7.09317614046052	7.92025539349562	6.67052251323687	7.3519153108447	10.8667041385573	10.8654258610061	5.90199630235388	6.1023074944899	9.79485037857084	8.49985406144932
ATP7A	1013.13546690379	0.413145662519039	0.00278945863140004	0.0125000744171434	2.20930221690775	2.52177373684618	2.07565914463541	2.4267956177368	2.97080647511238	3.03177271835301	2.40459434704795	2.74907471275022	3.22879189420822	3.08634854114442
ATRAID	924.138381038766	0.34813241533912	0.00539065006384999	0.0216893956325583	13.1343416437906	11.8166721730584	13.6556314289561	13.6951211279695	15.7830308970932	16.7407195259454	11.5067279192027	12.7295652217378	14.0475765168469	13.5064557635468
ATXN2	1550.07221138457	0.561281787028856	0.0011430334083895	0.00592849738663956	6.25456382215761	6.56476240321922	5.50040182692938	5.84135626405731	7.55272854241475	9.86151918590873	6.83137446076246	7.22159473445504	8.17135716475514	7.17419484425528
ATXN7	1414.40444982529	0.450423793609025	0.00271737697884541	0.0122354881140499	3.31709190334967	3.71819661975883	3.4014001044486	4.03217793688357	4.39563648234835	5.25096386093707	3.74213403770589	4.01992409979762	4.83354794793745	4.49435543710309
ATXN7L3B	3234.39249310102	0.519763969013083	5.95724312980486e-08	9.67379416627022e-07	16.1082096051508	17.3132866678853	16.2068356906601	16.6092713745936	23.1208199164969	23.2612335750457	11.0749660001952	12.7408082286408	18.2672143063819	15.583947641782
AUP1	3003.27698205267	0.403262232097887	0.00062817336653126	0.00355648667895703	28.7041747037566	29.0687269840412	33.7617382698256	30.9888424012842	38.6986075077865	40.4131252866225	28.5317920439292	28.631771676799	30.142470399896	29.7878057324947
AURKAPS1	184.725916022022	0.549263763859421	0.00690722719483288	0.0267292852944785	2.29651654298679	2.4790578675782	2.29014558137575	1.92023514593501	2.965788436513	3.4459818621377	2.34977877023858	2.38103275436928	2.76049992758588	2.60191415580582
AVIL	73.5303902963127	0.864854805407318	0.013721330497914	0.046427007955657	0.583320855978699	0.39338516232313	0.304189267165431	0.377539803869706	0.639567593731961	0.841086733018935	0.406061561804609	0.467204315673697	0.728566572827005	0.718342965882486
B3GALT6	183.424192767975	0.887215844490353	1.21427917942917e-06	1.48814258277873e-05	1.174845247766	0.960694507436764	1.17915187850445	1.09827760923682	2.02346964098121	1.97413250293965	1.34635480719469	1.32361254978143	1.26638263750582	1.3417019343379
B3GAT1	47.1944421439438	1.27287298192329	0.000153339444648496	0.00106365656506372	0.160911101685389	0.16455913606189	0.22653840639558	0.204440051139529	0.523934612480094	0.371010422440287	0.201603736092568	0.264969961475015	0.685263832706493	0.754623030400203
B9D1	422.345404124175	0.856942902388609	1.33768116033438e-08	2.43981411634901e-07	1.41412486509673	1.36974071882514	1.69052135091629	1.58090574133805	2.69580490594655	2.6617730399934	1.4850114187605	1.38519786517374	2.30601026550776	2.1039122611822
BAG4	764.834840352481	0.356876523733413	0.0112200199238866	0.0394818316434908	3.31061440245545	3.745575813564	3.09842018596851	3.36588627160554	4.36161718334995	4.09482411201782	3.0669690947118	3.56458113014571	3.89691809893994	3.47573000492163
BAG5	1171.84448791423	0.404216975074281	0.000924738699491588	0.00496283007808172	4.2616504633053	4.63759843136884	4.0827964059688	4.39546209722592	5.40871040620601	5.81902232707718	4.24716219468981	5.20701519550465	4.80686867681255	4.47543640215402
BAGE	46.3496256847105	0.95131873668747	0.00306897209514848	0.0135621317643394	0.768566755830643	0.843502560732237	0.653173827903977	0.947163387187781	1.3512992584893	1.67533997177048	0.755664224685138	0.980916176265491	0.977281387412631	1.33075844796069
BAIAP2-AS1	1446.68902631219	0.363316187591016	0.00426541263630236	0.0178848893952907	6.50417335485428	6.7191568527962	6.706725630718	5.83921735959124	8.07315853401192	8.12320248672009	6.48952439778016	6.10290193037268	7.87421149462977	8.59922202480861
BANK1	24.6848841467645	1.27869452057133	0.00343338255848488	0.0148923602407546	0.0701455859494179	0.0845458405624323	0.128027944794894	0.123888060277459	0.245331177222946	0.235999134850263	0.243409030215416	0.22689014876163	0.329355077149509	0.199187385903863
BARD1	1343.76545912527	0.407402616407654	0.000788601472644737	0.00433778554879953	4.60730484421962	4.59379809340756	4.51266480448007	5.29072199553169	6.28851623069074	6.0219377442219	5.36131193772881	6.28499722721835	7.23257140619471	6.60127731143931
BCAM	1143.28108298263	0.791120088677868	0.000874880436597254	0.0047414698284857	5.45565421469023	5.21668288921815	7.15734592499081	5.3009420352207	11.8867043025733	7.67463070016232	6.24065510884177	4.93060310103389	9.8165118373958	12.5042811215272
BCO2	48.2142294901499	1.16075152671149	0.000896543242494533	0.00483803840413818	0.207843100273175	0.3423655932036	0.193123614139763	0.242594231407374	0.500768713178926	0.566589016057515	0.276214579130157	0.298791601633681	0.356703601727536	0.362549668304174
BCRP3	24.425955819379	1.174110104058	0.00997020606604604	0.0359086387321474	0.275223853923641	0.351829357568578	0.174363034480472	0.242083506709674	0.663599314109364	0.483489293702412	0.297411490535997	0.327316239869643	0.453709034046395	0.639436438236942
BDNF-AS	17.5489604623532	2.75341659967699	4.78231275027761e-07	6.40757173742519e-06	0.0526215141562166	0.0246649803805456	0.0407457074671487	0.0502851932599083	0.238572299267312	0.32482702527666	0.0846087703194652	0.0529534371462039	0.245180887382094	0.157726955698273
BET1L	909.939290177347	0.700167225770719	6.79087563101103e-05	0.0005222542022819	4.80050463626501	4.74050186916762	6.27612546303188	6.19813488931343	8.87521774452242	8.58010511326068	4.87469104075408	4.63658257450401	6.83498999403874	5.83112601090141
BIRC6	11806.7595228527	0.722105917567631	7.01850958436283e-09	1.35889143260317e-07	13.3833060519909	14.229376723387	12.2754124759567	13.4418246954951	20.2690602058276	22.7082324804027	14.4952957856889	15.0535067961564	18.4980267833469	17.755760276878
BLOC1S1	458.700548324329	0.442917573292731	0.0046649263219495	0.0192350425617665	7.9546771253555	8.71382147673272	9.07417186414807	9.48702919098379	12.7996573189574	10.5936344715455	8.2038664552298	9.64870696367185	11.2692918690558	9.00003602374083
BLZF1	1410.72523212435	0.61845248866749	9.08934068296902e-08	1.41346066631272e-06	6.29646146675424	6.59375030264666	6.38241264152768	7.281005032589	9.74734019889839	10.1540669078604	6.0254400777266	6.90758597363658	6.70014422689203	6.31962932472806
BMP3	7.85915471614591	1.97222200082215	0.0128589525227937	0.0440696137909166	0.00611770749112729	0.00860255378406355	0.0213166887555484	0.0230189790611321	0.0540853936516726	0.0591088060677709	0.0158086663339573	0.0092344446270176	0.0381342715590535	0.0434300372000897
BMP4	683.628571868816	1.1397447009793	0.000198789264261046	0.00132896908082653	3.92230225580272	3.80857961194187	7.1017718407395	6.62203359309153	12.8010808120632	10.2400600219175	4.21339515522729	4.63071110931899	11.1903511993865	10.9449607997259
BMS1P4	537.824774429745	0.684445329029018	1.55772705169524e-05	0.00014437450249247	5.03885601762566	4.66824603585093	4.59537780606219	5.39747410367998	7.0019103453023	8.45836459685861	4.39041507685099	4.79605644251692	6.17466021581874	6.10822201364307
BOD1L1	2741.35284734709	0.535702556205947	8.73284487911218e-05	0.000647848395474011	4.38318943642038	4.71775735020814	4.96133292831992	5.47388040510725	6.48837974784886	7.32996994763384	4.92214508105404	5.33146365382432	6.20769325916183	5.87757454611646
BRAP	715.388978511597	0.54753089920453	0.000606921308815208	0.00345503926979488	2.92846896782039	3.01236452861228	3.58090089705157	3.7513146635615	4.54178763621012	4.92382139474759	3.05892209881979	3.66700802867223	3.52923251927078	3.8004166407851
BRCA2	2190.25538782454	1.02640631018535	4.18860793015015e-07	5.65943888967144e-06	3.24725076680543	3.74938823648992	2.4786357719682	2.84797872156691	6.09047324121101	6.18341394127058	3.88890526029354	4.74246774669589	6.55138053042522	6.00875657944966
BRIX1	974.961697752534	0.523177334357573	1.73954103913343e-05	0.000159050200147856	13.4297664134721	15.0249514827327	13.8091619658508	15.4614279471913	19.9041700127522	20.5832487325969	12.708985497596	14.6277665177105	14.4588011899347	14.2759752069069
BRPF1	862.069567879656	0.35236647785718	0.00321818152306156	0.0141117820445051	3.49784497986591	3.73115033701477	3.70957355857204	3.40127326927092	4.55331221681194	4.38766534034939	3.9103145538298	3.49347140630099	3.9004798520676	4.01779228692212
BSN	106.147474660076	1.3248235710786	0.0143565664895909	0.0481164818299604	0.0413308469376754	0.0502644861994083	0.155691035863571	0.136901036910509	0.24005325436772	0.227998913536021	0.105070425125404	0.0854312945622251	0.19243329934216	0.283894579657748
BTAF1	4022.41741878357	0.575839545637142	0.000171076850685339	0.00116603598925532	11.0259916717346	11.5508682466449	9.15836388215445	10.6362990000425	14.4661444682053	16.3940495038341	10.7161122467998	12.2451132493694	13.9000971448077	12.7957700156572
BTF3L4	1161.47554723378	0.554585549180985	8.20724131973765e-06	8.19282633498343e-05	4.36940029678374	4.49741808278959	4.57994008698235	5.23806036890387	6.62703286274246	6.77026892329763	4.6751051006026	5.23153398015608	5.9746733512655	5.26608890955957
BTG2	2124.54200355865	0.613050043024217	9.35712919721703e-06	9.20509543974131e-05	12.7570561713542	13.6019163334805	16.0084689347803	15.1707747795713	20.74089136777	22.2054407148944	17.4342240845731	17.8401885527792	22.3282457932298	23.7985261744231
BZW1	4468.07842277238	0.552908731170079	0.00270707978253127	0.0122015959806647	24.5363459569617	26.0623810996164	18.4831331472464	21.4876522022172	31.8438201383364	33.126365852954	29.1620680795882	34.2799447453777	32.7605007962861	30.7240086178012
C10orf12	4437.77453387014	0.360858655439248	0.00186165440531846	0.00896163344351901	5.79870698779505	6.43162291299005	5.54436331040322	5.97497617891169	7.33053410707957	7.56757354694349	4.45120353736074	5.18854283837919	7.17964166139787	6.55759888625773
C11orf57	1370.91860409748	0.412162497584439	6.62050362537038e-05	0.000511159743099915	6.84892397174711	7.09879917751487	6.92559415279308	7.31227250072618	8.87300551388146	9.43875578204327	6.06099084074635	7.21467478744926	7.66072618341904	7.39520977700545
C11orf65	17.2017728947885	2.43862795960073	0.0012028464250603	0.00620047890994857	0.134882721027578	0.158057009626489	0.0261104796274351	0.0604191181626184	0.305761639540157	0.692338911172423	0.127801006473813	0.113111272144301	0.522303560729836	0.239385488778805
C12orf49	2742.57753337713	0.425435776276536	8.97821672960394e-05	0.000664094040969319	9.6531953277939	9.36125730266129	10.3763431908584	10.8751436381474	13.2122165010756	13.1923564534559	10.4421949987253	10.9784797786166	12.9424977374122	11.7731277083973
C15orf40	331.237551738403	0.574909332526851	0.00208814462626899	0.00989324572316983	2.42302216344929	2.60494138425681	2.22959508981289	1.99153788464096	3.1586696963008	3.56678025168737	2.37963759309082	2.20190510935245	3.3242653217543	2.97328313713337
C15orf54	32.0365344724468	1.92440867737687	5.82880784247461e-05	0.000457247397046127	0.0692310665209512	0.0730131312429937	0.154119429749123	0.16746067818509	0.400191520644743	0.459872249926293	0.0536696547927981	0.11611293049894	0.255004849991185	0.221164302060107
C15orf62	42.766913212076	3.25730669297746	1.07038988621312e-09	2.38121204610972e-08	0.0572985122672396	0.050357255377182	0.0831884706490802	0.192496427091026	0.944937367419382	0.85637118457548	0.0666288603092592	0.122527365189018	0.462692299749127	0.477950263949368
C16orf46	91.8965975691191	0.768970310620387	0.0125866555086393	0.043321797891525	0.504537725353158	0.61937614329374	0.85575748054769	0.912616394342026	1.25264747160218	1.15099529677093	0.662231140300473	0.572192628530152	0.962106210589454	0.977874307501464
C17orf51	916.861506893608	0.518718392157817	0.00202111125409635	0.0096217128305657	2.32976714061373	2.46813052390634	1.93657124051712	1.99836691506264	2.98795823624192	3.1266948456905	2.00754717325302	2.1585382039315	2.24463075597456	2.21695409458887
C17orf58	207.292923523249	1.34293776859404	0.00029576841774227	0.00186980400150738	2.11738309771453	2.84934599448499	1.20319957940907	1.37067289878189	4.5520996274375	4.79827811682935	2.44746420664305	2.7837074113582	3.54799704096686	3.20024462623374
C18orf8	519.766638248833	0.707413699210432	1.07460933801116e-05	0.00010425959210583	3.94019937894847	4.68473592018538	3.71138298628835	4.31340390155995	6.31770029155884	6.94466069816407	4.27966874419181	4.8918440213775	6.60767284253889	5.38967932274062
C19orf18	25.8944690347654	1.79333950860489	2.3966494995214e-05	0.00021134418184218	0.448110373191621	0.273965483352581	0.294178070469102	0.314179414445615	1.21896973630009	1.05887127591077	0.342351787038942	0.196059538383456	0.728677162774308	0.608571109251006
C1orf101	28.0165228934862	1.20258317909259	0.00416909242373122	0.0175520285337444	0.100465245248782	0.141271493763839	0.149101138987097	0.138006799770569	0.364386695286679	0.229190046570541	0.207688457494986	0.17411486556815	0.430146421014947	0.388303149132875
C1orf109	431.147827493507	0.83499800787307	1.50327192364525e-10	3.80548103774505e-09	2.71143702709064	2.99713513393264	2.88141578687472	2.98254914920795	4.99955639207022	5.07242647931067	2.84597142401847	3.08718838398896	4.19766449386931	3.43301249915855
C1orf112	946.528417518995	0.862866530484885	0.000552267433821527	0.00317675478827995	4.69107504988528	5.14986951093504	3.17036403582969	3.41616729300381	7.57443492765349	7.04610623508509	5.47268052129281	6.10097659208163	7.34793504460958	6.30341265336911
C1orf145	42.4099014826488	1.23739709897423	0.000539083440926065	0.00311720090110808	0.151332764254201	0.127680008795048	0.210923025581216	0.222343722560409	0.445967280987476	0.37772601070501	0.19292119827896	0.248735976327737	0.337308883678645	0.30797229888204
C1orf162	28.0180232766052	1.08227579578241	0.0106212948488542	0.0377519858668474	0.415386399125707	0.365065656214969	0.522665892192677	0.409348324452443	0.659138975179577	1.10787405664062	0.357797698618654	0.400589610221342	0.765014549973556	0.540623849480263
C1orf27	732.502329647207	0.448348206770209	0.000819475066284418	0.0044895308435526	3.71090777701143	3.57100928089129	3.30566982400253	3.88119636495201	4.63653465646129	5.00680868707087	3.20667922039721	3.74352439183164	4.30428933536298	4.33977545030334
C1orf74	265.219973357367	0.505846080818497	0.000922533790517186	0.00495401489031463	0.954689990438245	1.09462048322829	1.02781711494089	1.06186817953411	1.43833298217794	1.42796770349737	0.899505625229656	0.96810202135254	1.15690547011766	0.995758167851812
C1orf94	30.2173882177302	1.64393127427214	1.99604189071219e-05	0.000179338409344508	0.0974448810581867	0.0989620232152734	0.150906361454402	0.116398082485166	0.368158184262594	0.339987821357318	0.447654575860569	0.408581409704362	0.343588491847312	0.368942979851257
C1QBP	1539.28094904332	0.54178515164198	1.6105380516645e-06	1.91213409247148e-05	23.1306469822697	25.8438024336945	24.4443705959376	25.7894564058905	33.9831846649365	36.5072351739346	21.8488872393369	25.5440459965733	23.8350852446288	21.7418010787034
C1QTNF6	145.79310542696	1.10226760247047	0.00185943562138902	0.00896070235883293	0.582899170435256	0.486671314177584	0.980272424350576	1.05746627164563	1.76731477361184	1.48864702652169	0.734301782366042	0.629347111544577	0.977180081736291	1.13796164502317
C1RL-AS1	2462.77654267725	0.79911227502493	0.0104951469269104	0.0373865737374108	5.53205071951462	5.87705849284462	10.2310536698726	10.8111806320631	12.5235780152315	14.9593686458858	5.12393179969836	5.55673713874938	10.4048720782924	10.322212673076
C2	38.8256130633761	1.27160333151598	0.000164860075391805	0.001132850118733	0.0244549527761516	0.0185880481438241	0.0176564228802013	0.0234481373750194	0.0503420691409584	0.0494914623250595	0.0341587228957079	0.0299301182446195	0.0389522461057275	0.0487977656596114
C22orf29	1662.91039662115	0.378699402839	0.000688894263612295	0.00385443887919499	4.98941044631833	5.01356834535224	5.04299416982707	4.60998509009304	6.25632093482969	6.23034432728806	4.61567120088417	4.44498148016122	5.87704065036783	5.56575530782664
C22orf46	1085.34757280389	1.21880068969811	2.34446944262864e-22	2.14026979842871e-20	3.08523551370729	3.08372243955333	3.58342321741965	3.30523059160897	7.17903131193613	7.66005572261878	3.04084892344615	3.01094248871195	5.49879959636192	4.95027698228072
C2CD3	1923.28302037624	0.527942240744686	4.58554774501712e-06	4.85170423175263e-05	4.18672683928917	4.72582883235242	4.3411295622235	4.53156603133774	6.00138289336198	6.51706186172877	3.89048383687878	4.23738707124612	5.80775408110402	5.77017975135723
C2orf74	123.526773666263	1.08728355708598	1.55269386559725e-06	1.85219453066743e-05	2.08800487782308	1.57907664420543	2.09909238729259	1.84858714523217	4.27184522124081	3.66609861374223	1.97686750117698	1.51849656253879	2.24712405288265	2.01790657489882
C2orf76	98.4410122824743	0.746734739490487	0.00842232785152085	0.0313793602063747	1.3132742673508	1.66987973885165	1.02229894334407	1.4268571369219	2.50829979471046	1.94043416941327	1.25635782810414	1.51838586074084	1.80508014745388	1.74558797794568
C5	85.6546977476388	2.76036593132649	4.5753561447881e-23	4.40509289153123e-21	0.0769141882369628	0.0961374562867159	0.112494527279467	0.119436373756171	0.623801626797866	0.712174688448132	0.12366833207289	0.163398613365119	0.65539449915993	0.517707140790536
C5orf15	1410.61732296664	0.425433981052849	0.00022705521437392	0.00149606799628051	11.8560098366562	12.1767508256253	11.2287768505988	12.6365963169218	16.3807408338179	15.0457824991827	15.4214572745046	16.4687433642299	18.0606864670012	17.0219699225978
C5orf17	135.536766350128	0.829871340469711	3.71507882337677e-05	0.000310070932207841	1.09511276674506	1.22436084969579	1.10513328123008	1.25450289856683	2.19760404974632	1.8646655634199	1.44740519169298	1.1833170477509	1.65825254725463	1.69504854756709
C5orf22	1031.98896215429	0.406672899147538	0.00335684055155656	0.0145850540918685	5.44384844710599	5.48966301380623	5.10188073273945	6.21852566377241	6.81356630281491	7.58808888780903	6.36665938140037	7.23637192396444	7.99890628571464	7.45596105308579
C5orf34	378.054637712846	0.87346211227579	4.44316187790063e-06	4.7215964491394e-05	2.52660594822859	2.75122779314631	2.05176004598641	2.75406226543642	4.84363616101873	4.18197719866218	3.46998790580993	4.17147048238009	4.57047928623091	4.42668155402055
C5orf51	2319.24865455858	0.481621493721305	0.00411622004670835	0.0173751032589733	9.22953316674755	9.17465804715621	7.04132841301716	8.22711675966891	11.1482115923502	11.8363750377002	8.28247791215278	9.29800961973167	12.4283361748028	11.483080655529
C6orf15	61.9457118709047	1.65764453846988	4.67174823103077e-08	7.70707229237183e-07	0.0993876153033315	0.121367191458791	0.112398412961939	0.123717363317493	0.416209957132854	0.287450824167677	0.0648823291509179	0.0394794184905066	0.106712484625239	0.133684994789854
C6orf163	62.8390060321953	0.986697804178689	0.0027052916326029	0.0121966564162821	0.751905659204732	1.03808547027999	0.571627279450934	0.778943287502051	1.33878577999883	1.68412502012188	0.692409886859028	1.05930788165693	1.36347567267585	1.9992604640045
C6orf203	159.727951514113	0.590344501980556	0.00271936518457198	0.0122413120048477	1.68929204958452	1.38334243642662	1.65044720137766	1.84812450426119	2.43279913199342	2.41226694796393	1.37634443599071	1.45995505756108	1.91455918160778	1.4390884166007
C6orf48	754.324403172736	0.599089065067187	5.13298530943191e-07	6.79985474938954e-06	3.05131900629085	3.07809777482091	3.42846385240091	3.36946462245907	4.82682434913895	4.73668417424082	2.46830486786599	2.7242928810796	4.66106897186035	3.48468074481062
C6orf62	3139.76816466231	0.460480548814723	0.000101624292962887	0.000739272674530596	23.4713751688216	23.9933608440128	23.1922930264538	26.7518753168792	34.4927566593814	30.9678814979499	25.4827774596456	28.2475574547366	30.6372276926484	26.1707612876275
C7orf25	518.336239705468	0.569999110648623	0.000209170275859666	0.00138965727389572	5.25530180848218	5.24707700801248	5.24163944064926	5.36618439873111	6.77584547283429	8.51777328468711	5.30079741172704	5.77011278703813	6.57606184706457	5.86661033574236
C8orf34	21.1719638637774	2.81074287969265	0.000133378959354244	0.000936629687071511	0.0265925782273279	0	0.0463299131334463	0.0393090410391587	0.185366924974252	0.204745387491975	0.0446663358614933	0.0535206347554315	0.184599532108251	0.141586942085842
C9orf47	93.2751380508885	0.879105252823391	0.000320556929737745	0.00200706913470125	0.367754690062017	0.343044402715073	0.27911974729181	0.293580641562233	0.56457238026367	0.589271092680732	0.240870346128898	0.318776951654718	0.528215174441269	0.579010391377406
C9orf72	1088.23455577518	0.408507370938253	0.00896922403452622	0.0330534947216728	4.80649047432009	5.09379423075572	3.94414190912302	4.70931664603368	6.14410655544889	5.88994245890214	4.75003503269184	5.41486619210712	5.87703063798692	5.69248407450632
CA2	152.085662744226	0.940476594932732	0.00140800122005806	0.00707171422354705	1.93678687447493	1.7303732284379	1.11855037875753	1.23088177556214	2.80891435594127	2.84314776364995	1.51527110600475	1.53982054620548	1.4674140943024	1.50407655602702
CAAP1	847.543845056353	0.447362104066303	0.00511184383397242	0.020781166707605	5.93232591229208	5.64005330868187	4.85385813398822	5.53194922498263	7.97068792966037	6.6715904349514	4.92161640711907	5.62533710559186	7.02282445129493	6.25742433454895
CALCB	11.4488767823986	2.64224116602043	0.00547841449244746	0.0219922954983896	0.207491751260659	0.0972564179505768	0.0200830362216839	0.018588694744115	0.564428275822335	0.50119222370946	0.0357450659143757	0	0.0783869269539419	0.122749882057286
CALCOCO1	2378.26433698429	1.25012791669377	2.36722200101613e-08	4.12951331048547e-07	8.87838425391098	9.8345603622717	14.043923496997	13.5085802270843	25.7911850198068	27.8495428378631	7.87031598949368	8.69291690638188	19.7863490971619	17.2839571289697
CALN1	1216.91864694664	0.389104049181206	0.000977779089178081	0.00519526229560573	2.32013550929358	2.33323564413998	2.27158033536608	2.61715449907342	2.97589921541225	3.12569125359772	2.68247899897651	2.69424227986847	2.60523440072149	2.54099265920977
CALU	3354.47993359432	0.698794298311609	9.33129846228804e-05	0.000687612495219795	10.1164371815352	10.8817669585296	7.95693996901557	8.6626150348723	14.7233716936435	15.1338463154706	13.9132993852953	16.7585163226024	18.2139629479353	15.9024024658553
CAMK2B	36.028573087295	1.55781208236542	0.00621968624840892	0.0244608598238207	0.0427319668600118	0.065551122406	0.162432332186537	0.141993485630901	0.343440481806437	0.248662078522518	0.100384514484968	0.113367614970691	0.180512845351388	0.159952003644837
CAPN10-AS1	163.432880178708	0.849231093523987	0.00849953965091071	0.0316068782417467	0.929582823386867	1.01199024632846	0.661743644317183	0.510420439224094	1.37310720469245	1.37017012966418	0.811038209190111	0.895212139515374	1.13850583540737	0.936656963775728
CAPN3	139.87114696302	1.97224257382328	5.55644619432936e-11	1.50845956083034e-09	0.433261323591998	0.581858696552348	0.316634128698837	0.340175144259111	1.47653147391157	1.71678637962157	0.568597407731091	0.543768077987866	1.36828212581919	1.20265386902156
CAPN7	1534.06386091697	0.588917370290598	3.98468224359624e-08	6.64201669346473e-07	6.26883503442459	6.42191275005626	6.24770934847181	7.02012611032328	9.60883252401331	9.45897532713967	6.7412264659385	8.02921711879086	10.1067407218171	9.11498246221931
CARF	132.574166515692	1.75202386955764	2.51796467360336e-12	8.27686932541372e-11	0.205444731189727	0.242930891537497	0.189810466752085	0.20078516795372	0.571561241853877	0.803582902554071	0.311292432002754	0.300713634566138	0.833464193694243	0.725918625453967
CARS	2337.62694156277	0.766424377282319	7.04136175959044e-11	1.87687977068417e-09	7.31178141846252	7.64360791244009	7.24366771516305	6.71145908679544	12.2263718150493	11.8047729203352	6.03247299564399	6.06654123118302	8.59412348175104	8.08036812040736
CASC8	456.517941174044	1.13268998827358	0.00577956209929524	0.0230228588350628	2.02076238032233	2.32253813099909	4.94062441451363	5.37650093188454	7.41714116313709	8.21319460854387	6.29479491513874	6.57408334138562	6.43147086426646	6.03953563073389
CASP2	1503.01949370742	0.564849452270152	1.48628442628303e-07	2.23056603975134e-06	6.22205268342142	6.30869220035138	6.26160478157987	6.90026007643955	9.02507960578217	9.53170555050235	5.74587776080202	6.36016242127694	8.6430496617431	8.14253661951261
CASP4	869.561568315958	0.697662708561416	0.00455825306809712	0.0189013558029662	8.5363418534481	9.29879037255034	12.5869084040954	13.5154755156435	14.8593472323691	19.8601836770964	10.6037309497534	11.8035999732203	14.0346734598328	13.2445564560772
CASP8AP2	1121.62526997145	0.487086910600122	0.00153719212623445	0.00762923607665489	3.16315238133578	3.47680549160165	2.70033244475801	3.28153267449496	4.20547262638207	4.4346921449044	3.38397370941076	3.89399812431503	4.73214564380417	4.0195241136401
CASS4	22.4125787840031	1.47256653242836	0.00088221672013853	0.0047709565353348	0.120378757471206	0.0923309087541848	0.0762637581751604	0.0823539656036082	0.275363789617795	0.231296314105738	0.147050680923996	0.104619247231319	0.173639794913014	0.170915458859629
CATSPER2	186.906031118619	0.780594457859385	0.000128440927556823	0.000908470775842501	1.57833722407476	1.91151914907237	1.71663709100209	1.46140056187114	2.58104134454	2.9970645189204	1.83888607388835	1.81781507517557	2.49192401831792	2.37047988714373
CATSPERG	200.322836265011	0.890403960630976	0.00914369443803762	0.0335770638398885	0.648254531968906	0.596534201519183	1.25119463579403	1.11197671364081	1.66616384759154	1.59462994198433	0.872060139507577	0.743479786931379	1.29112595479906	1.15726882120757
CBFA2T2	1173.28119723809	0.457313035722543	0.00915216033550571	0.0335941485315157	2.42286871301755	2.51406673374364	3.23778522250352	3.21715434504125	3.72722936527794	3.90250082677988	2.74641482190926	2.97971122990316	3.54728815044918	3.35689995758784
CBFB	1913.26347804081	0.878389485883527	0.000126732542351572	0.000897201295749914	12.1767568485063	11.8578172483435	8.08265606491926	8.99828695742723	19.9671231663195	17.0291376023108	15.721114680177	16.3132737549261	18.5275308022641	17.7734620161082
CBL	4008.18256046829	0.377909269999091	3.65523911243267e-05	0.000305510711204702	6.91905363577978	7.11345486449896	6.85270711875299	7.12094314712624	8.67024685516752	9.10406793836446	7.36669493723484	8.19742194951708	9.60110210704605	8.80060148528439
CBLB	769.97432765832	0.622165010842693	3.07380837881087e-06	3.39545014584757e-05	1.73823859023371	1.84105216842738	1.69973364778597	1.78222692776506	2.45234323831762	2.85218879796543	1.61887875882709	1.70423629573397	2.83856903164386	2.82009046618733
CBLN4	61.3109290687418	2.57827766815847	0.00215843440355007	0.0101411882016397	0.0573768896979238	0.0161363641627043	0.293223963682159	0.277574024027427	1.06133831030341	0.810767545990251	0.0593066671350521	0.0750604508873899	0.351151735696312	0.448054847895615
CBWD1	358.833139176334	0.584598908471841	0.0038606579880892	0.0164665768195384	3.7788148582372	3.93706904659731	2.99043136772007	3.87298160102975	4.70024986242925	5.97080901600423	3.1874646709726	3.58591926710564	4.78200072050804	4.22545403996954
CBWD2	436.069226016015	0.733289044493276	0.00284495652799516	0.0127060301816849	4.35329703107253	3.5960831446468	2.51850970764795	3.82587095678203	5.89850258130922	5.72744161357304	3.11386985065241	3.70615332132235	4.87753009268191	4.51227198755874
CC2D1B	2018.71922927796	0.608644564195796	1.85366019531286e-06	2.18167261063576e-05	6.43209749618954	6.4509567938517	7.25831618374781	6.08098868773284	10.0306852596985	9.50474619650215	6.51806914710317	6.15538179314595	8.34755611366753	8.24600447523011
CCDC125	424.29052960532	0.431937782897454	0.00129814764934569	0.00660660411144473	1.07379986985956	1.08770314459198	1.15232678511005	1.10790474284157	1.38535032456362	1.5260721267966	0.886442472436769	1.14826003058765	1.23877170761113	1.19375542219031
CCDC144B	1201.12840850096	0.421612233521121	0.000343553626901427	0.00213061293642247	2.7183304402307	2.74143485305311	2.53343714427411	2.71518069853	3.34036152513918	3.66432454727169	2.24822940996679	2.70659561451898	3.10173040637941	2.88445566341886
CCDC168	11.8720820287006	2.20056027891615	0.000537918755186649	0.00311353171735662	0.00332128544557893	0.00467030120666254	0.0048219865730219	0.0089263829907697	0.0237161089113285	0.0250703104450228	0.00514948713894569	0.00584891170631594	0.019761939397762	0.0176835298184995
CCDC18	734.100906191802	0.898768459046789	0.000248501636325708	0.0016181064909189	3.10762937167766	2.93592050286284	1.88900870993131	2.31659764901977	4.45454493813577	4.89490326983133	3.68916318125833	3.83132673499252	5.19657868066187	4.84027129918047
CCDC18-AS1	653.211413831426	1.01229036191399	3.59411358550639e-05	0.000300829868232955	3.04557469488739	3.16378166102689	2.09982510065049	2.109902122699	4.9539905690058	5.32787548846149	2.3073205174373	2.37531988716936	4.263277979034	4.27394209973334
CCDC183-AS1	145.363827559228	0.938058394227685	4.23154180828689e-05	0.000346125975488425	0.96382353401496	0.819485186373584	1.206236310936	1.03616002190803	2.05275498706536	1.72351344448677	0.926735028274636	0.691713828211202	1.23630244830983	1.34723397375816
CCDC191	289.047894470214	0.862623379315833	0.0020144198748688	0.00959504292384792	0.892246711820885	0.996156688337089	1.40606508879028	1.64849369823049	2.11611509340806	2.26350601887766	1.1539785684699	1.18212658794431	2.06818958297486	1.71880707586955
CCDC30	79.0659108428184	0.953729520628766	0.000260682056087757	0.00168178584628715	0.356770166884114	0.36412294309369	0.50126558290565	0.457781109363302	0.782662944336167	0.806173138405915	0.481779567394356	0.353229926884202	0.619561617213028	0.857862393938764
CCDC7	196.069190210374	0.742498480178028	0.00696711265154003	0.0269196398700622	0.507263646549087	0.469514144480099	0.288372049461941	0.391168270836959	0.707407397979934	0.648832517127695	0.415919956540498	0.488924797934153	0.606442262647933	0.701986664921244
CCDC71	468.668553494677	0.385954847885837	0.0109144539732197	0.0386070597378354	4.81092870786527	4.95269720650138	4.9707177151666	5.5210269949102	7.07870256634532	5.8578800368772	4.59647617463853	4.72247052015183	4.95070546773514	5.75504557408801
CCDC78	64.0395890628557	1.13553878814421	0.0105786308998085	0.0376535147118637	0.398368706796535	0.404571002418244	0.963948340063131	0.689985579334939	1.58033785948549	1.05580398895385	0.640526730488019	0.322932330912787	0.539281134799675	0.785568767231915
CCDC82	1037.80160861595	0.443039527427242	0.00272401521390089	0.0122559816276097	4.37957229402221	4.56094649750353	4.19275462299138	5.34547510775075	6.37103900754519	5.8958748038975	4.39498006641955	4.89182355276467	6.1391750717733	5.32402318048335
CCDC91	1112.20725461779	0.349684789289653	0.00280846434890366	0.0125641697528022	8.20685657966523	8.24444716131313	8.62192016309811	9.46212712155716	10.5437845373674	10.9426395134185	7.13053741685896	7.51231976536341	7.68363394006468	8.49329943350923
CCDC93	3508.17344813369	0.51666565355223	0.00234238524943997	0.0108492338879818	8.11464234814881	8.66828529041994	10.2108631183934	11.2765879397289	12.7620777980451	13.9392836468888	8.01525711896177	9.23251128872844	11.7073149294054	11.3130677632584
CCL2	63.3477294734631	0.926850994110943	0.011049295800048	0.0389699235132729	1.43188752041325	2.0470392842469	0.997860739496677	1.15451471573389	2.79147687996782	2.42108720114536	1.45537926004388	1.80114937370343	1.83920705317502	2.16854838491779
CCNB1IP1	812.462955477958	0.36904874751029	0.011521467439213	0.0403652286362087	9.24127976030407	9.72382472675078	9.22296166593215	9.73024454608082	10.6421735062251	13.2553601123206	7.74878189116976	8.7462788021559	11.5041881408561	11.6496773000265
CCNC	1175.60225570462	0.375935004482463	0.0147837227634763	0.0491183125343557	8.94054554439561	10.4422175550141	9.14565103645541	11.5139197111916	13.127167586217	12.2350808851119	12.6118648266671	13.7092528845071	12.4097938918554	11.3992872482621
CCND1	3621.85776074216	0.566168100883692	4.35701989177982e-06	4.64687248627534e-05	15.9191906224353	16.3767993747691	15.5642079157959	14.9289062353534	24.3599635227181	21.0785909489786	21.3652109336382	20.9467834909134	23.0589200087533	24.030425873123
CCNE2	276.911248030991	0.600465478065127	0.00350895744740227	0.0151753365895387	2.0469005443589	2.08745417167087	1.50392914461559	1.83494147373024	2.91745508037245	2.62218893124784	3.23107334809076	3.50760295568303	2.69043860723529	2.01485420858623
CCNI	8802.611087401	0.453506319793365	0.000434799713063718	0.00260480657751433	94.3139505966223	95.8885033215555	80.6260573384765	89.5419704821775	123.005185721664	118.187569360176	98.2128935006012	106.2118583654	116.411261532777	106.843290171429
CCNL1	1408.73520854763	0.388060173984922	0.00457695311839177	0.0189587827277441	8.3149632898283	9.87696068035982	8.48534722810148	9.62663099838201	11.1098360887505	12.076290970295	8.09726342142166	8.99334395709587	10.999933218767	10.6309640447501
CCNL2	3224.79383965168	0.468883132797013	5.5301513912629e-05	0.00043732377631356	12.2342817724403	11.5562322175561	11.8834248779536	11.1301441450785	16.6677290970328	14.9964896905259	11.0125839963811	10.1766956463989	15.3305206355417	14.7139251581876
CCNT1	2486.54998755865	0.520754992927298	4.58326950567642e-06	4.85170423175263e-05	6.4569045132261	6.83797180030736	6.13358735591666	7.05521186562533	9.0801704533383	9.47409829505975	4.92225816874213	5.5498503459484	7.15239460919347	6.6611726009656
CCNT2	1714.63768165861	0.387213694753173	0.00231075854185477	0.0107196563320009	4.31094565732049	4.58574749145495	4.30426060188768	5.10473025155816	5.62543898888218	6.06055617366864	5.50838238592441	6.28223027546339	6.26011665077241	5.85162207655944
CD14	5.63423827856733	3.17727035966103	0.00646040495336595	0.0252665648997458	0.00987098539819763	0.0555212441345763	0.01146490052301	0	0.187960449732825	0.131137435610211	0.0306089393336556	0.0297997471131	0.0559364075924101	0.0981047506984973
CD163	47.6455880128173	2.42669696378001	8.36693778692888e-13	2.90191096196653e-11	0.10211169238651	0.0717933414608912	0.103775135378443	0.118923281935739	0.578684916838531	0.472743484519587	0.0263865128575571	0.0214074555633487	0.303786758140775	0.199346980297615
CD180	154.210329420736	0.590859278117583	0.00148152008902948	0.00738413081997466	0.971784878494825	1.07103854154854	1.0448134869997	1.10824907997998	1.64325202020565	1.44328900001981	0.739778040956101	1.030774899037	2.26972017636297	2.05098550631555
CD96	73.8717604693383	2.84029853396223	7.02985201054939e-07	9.1139781143392e-06	0.0306657103712355	0.0718688122900263	0.126639818621138	0.172162152373008	0.556121514117763	0.839487395351272	0.0352190012975166	0.0685758706501765	0.567664730903984	0.416045146884224
CDC25A	1218.9821461226	0.418387137579146	8.6864665541279e-05	0.000644950923797638	6.06098746160891	6.40562496363811	6.34688973324762	6.722727351737	8.11937410611934	8.54011398731051	5.85712708637288	6.39933889408471	6.88012379736689	6.18091695644688
CDC42EP3	685.015090910471	0.48481004674679	0.0117809983030372	0.0410829804742947	2.4875586122052	2.4651319432895	1.87466868836774	2.00812742722462	2.86128196317599	3.18319661513764	1.93388503482787	2.47587495394001	3.27145473946617	2.94823239103185
CDH10	46.8764473978369	1.25908083158127	0.00076543644601076	0.0042276566590168	0.202225999283494	0.174993659523638	0.192722376679987	0.234126718967326	0.331473009520105	0.607459893306573	0.557406769575774	0.662684661368512	0.799236572845689	0.773024344509102
CDH8	73.0054228563445	1.83790547395587	7.67253596633305e-12	2.34691686095177e-10	0.15479826010768	0.151864953918182	0.196519322737103	0.181896684413485	0.543498723692311	0.652172332699482	0.115352186156034	0.1412840191279	0.424321478983717	0.276008761456273
CDK12	4575.99599878296	0.454272673916692	0.000509877096375581	0.00297591283625559	10.3329017529307	11.2159146974981	10.1990692026788	10.6942378929887	12.9152860128622	15.481704554662	10.2977961687367	10.9568593780507	12.0400919189739	12.0153269316183
CDK5RAP1	841.764787546446	0.35669687696255	0.00128107324870148	0.0065291378561965	7.79198903978119	7.93226541025213	7.5045686319236	7.962899384435	9.63045808504326	9.87567315030577	7.17166011548146	8.09380718280039	8.29985991529634	7.93791791285531
CDK5RAP3	2166.21539421337	0.344023779801307	0.0130184709703936	0.0444606396641528	12.9598912927951	12.2725461902591	15.4644404498321	14.3752453414837	17.5336888440855	16.5984951595367	11.8469263020971	12.6099871821401	14.7269847672903	13.9750642270277
CDKL3	63.0259153558013	1.83206744527885	4.34372771386759e-08	7.19963674417998e-07	0.362909423277151	0.333265864252745	0.283874175891296	0.238865113600115	0.856246917873049	1.26123138680356	0.436358597546763	0.342839466994584	0.780637070744164	0.66248218440107
CDRT1	55.9634037209963	1.07719681484508	0.00198622421439031	0.00947867942398234	0.325844496532715	0.219136099863078	0.197457476133515	0.187841837987749	0.456034373272304	0.507603722465302	0.37585345003239	0.489473674038378	0.786760760818449	0.697310376355518
CEBPB	359.074426006985	0.632135316916999	0.000191518911961179	0.00128645509334503	2.96694019432426	2.84078433982737	3.54420357249158	3.07147992747259	4.34581671402182	5.05336149456702	3.01430564732429	2.44126197615872	3.2859416950573	4.27251073596756
CEBPB-AS1	71.2680671551373	1.55954933328991	7.53652856469092e-05	0.000571614708485963	0.389759494078177	0.430023521044339	0.188042879012114	0.244960606352148	0.978684077317233	0.82558480240873	0.198335219415924	0.223262552034036	0.536876624072621	0.630008711851904
CECR7	128.786418639686	0.783705895398252	0.00600411622347426	0.0237373213691258	1.0463389364135	0.910387502182449	0.676008554902967	0.646799293422155	1.32530733833992	1.43746501652743	0.696235470404494	0.868674653189793	1.17104490342473	1.05849483769046
CELF6	47.863385700222	1.47769683538413	0.000163651363494771	0.00112543847518126	0.174530066299321	0.238407445792973	0.185336931755467	0.128659765803743	0.373029200238992	0.608270949266781	0.144320078715552	0.165594902419257	0.418213440910772	0.354000359163808
CEMIP	30.9422968128844	1.37812988614989	0.00248946121453822	0.0113897214071537	0.0784574320083397	0.0758482351793077	0.0398677685082911	0.0448086993233535	0.176741245333974	0.127328627731808	0.0684249346622525	0.0370089006232008	0.0722472824895945	0.0661407630207721
CENPBD1	267.075539112189	0.725011808272955	4.52674493696981e-05	0.000366876596423739	1.5448511778036	1.32798899925942	1.71305409325464	1.60439036493876	2.33905654499106	2.66137495966322	1.60283540659808	1.60739329195932	1.83014121222984	1.68022832344117
CENPH	500.865281463108	0.58357507069327	0.0143714819387383	0.0481298498913953	7.4567939413486	8.13937841524067	5.30683749651689	5.73982492510579	10.5261911471327	9.0058691839581	9.2597220102554	9.98358036003788	11.2876046132223	9.96769693813976
CENPQ	389.52410881829	0.95006659416323	1.12695330878838e-09	2.4944460235606e-08	3.97187202385463	3.84431600555076	3.2711988565184	3.74869859203686	6.91766245466348	7.08957621828448	4.22275825557224	4.90012693501428	6.00982316961954	5.33172068726694
CEP120	1779.43685398845	0.635519590938012	9.64499426127793e-07	1.20864263079272e-05	6.40651886481477	6.49709928855347	6.97512282250275	7.66435046184418	9.88198772868311	11.0005584679933	6.78627019015565	7.68833475517979	10.0699496989482	9.50976766163782
CEP350	4184.22668852597	0.489586547022424	0.00165111719226958	0.00810560986642455	6.05582753454381	6.60042830246097	5.12562336933087	5.85658820483224	7.63661963360843	8.58111191575692	5.85142558406448	6.97126726723756	8.51352456115385	7.93979186951368
CEP41	337.027020490255	0.630187075984677	7.09573182114457e-05	0.000541914603193525	0.584182863111514	0.657169635120166	0.6566261208633	0.705010635290859	0.915025643926617	1.04920786292765	0.549291329496692	0.64855085989783	0.771007101741929	0.770568223668197
CEP76	679.33683024034	0.496390550944505	0.013346720976704	0.0453554058849718	4.63580945749988	4.61546468996362	3.36032208375744	3.68020284045486	5.66860412321416	5.57160802756463	4.67514025499724	5.28932784380396	6.31502045470104	5.95741952106231
CEP95	2112.9221241489	0.332067954910113	0.00842488684761428	0.0313822582173607	13.7108085139801	14.8516389456266	12.589120679224	14.3784629936229	16.5469237863207	17.5918111303865	13.7452667002418	15.0791057768644	18.7071256871444	16.8461077302637
CEP97	1531.77827486563	0.365398234081941	0.00166163393430399	0.00814588989663381	3.83976841095712	3.63651519135129	3.9161137464356	4.29236955628201	4.83803307602306	5.02926004816111	5.59288544821782	6.16792399983335	5.47586382824116	4.81018062452494
CERS3-AS1	29.6398167091482	1.56400784657736	0.00139257194257854	0.00701183429155279	1.07230072957263	0.895280061670042	0.428123522161873	0.504340638978488	2.09653629457629	2.10447348821363	0.692728627024837	1.04534376057269	1.9748495901573	1.71277617384895
CERS5	1483.77604165821	0.767503389679699	0.0032090996921937	0.0140789660051695	4.83875704219648	4.45585289709877	7.58397531121444	7.48195834115487	9.89750427191488	10.3113893297024	6.3004236438259	6.46156221500903	10.6273305687733	9.76875183161355
CFAP20	523.12339708058	0.560433095052421	0.000145414376623629	0.00101387253728995	6.55117882546446	5.90738073479003	6.84529740899258	7.33085300373103	9.14227302225069	10.0445705756535	8.04274970286337	8.63887341002101	9.86750324590208	8.64447598367907
CFAP36	569.524323684005	0.365281289212498	0.00677274279870085	0.0262723371577081	8.08208876896158	7.81217627204199	7.75524668002895	8.78566498501065	9.66018858030331	10.741839480136	6.44863733605826	7.87364048560109	8.29790519154809	7.43042402470441
CFAP43	48.1375496777886	1.01124108727353	0.00212035257089458	0.0100103140264179	0.172305572623706	0.149102404322743	0.123156046659069	0.131803520149397	0.243370351828784	0.324156318108742	0.184950817817561	0.240081828786283	0.281657487300816	0.277574445191919
CFAP53	34.1138441118786	1.21503880557987	0.00417671615040403	0.0175715286184261	0.414357288677423	0.230353140191859	0.246228879773099	0.207188586823595	0.616002273908173	0.64009245597849	0.448214144080395	0.33939495766109	0.611587515488215	0.574628691118333
CFAP54	36.2718675791986	1.19287635900508	0.0118596849618964	0.041295610542224	0.0346261493512322	0.0358770991795805	0.0677345666556731	0.0862050243684351	0.136329931594193	0.114453066420941	0.0659303160662568	0.07702482171413	0.101207042598298	0.131963024912168
CFAP57	67.5625925846175	1.36626449727813	2.02805943162117e-05	0.000182029440273731	0.152991609846377	0.151570722358025	0.258466756787905	0.183164086166948	0.430362340435661	0.508128787952497	0.255175986931755	0.297416239472855	0.52806063518602	0.488744205644825
CFAP70	99.3722912636349	2.73597191374544	2.38912317420157e-17	1.32788521155386e-15	0.18289038496423	0.297782137142951	0.150931824865824	0.175920114892064	1.17830497915664	1.42412087999337	0.383057984306769	0.35355823073226	1.05821293248959	0.861012212663809
CFH	8.51136470526457	3.28252754714814	0.000249213536458802	0.00162025582984045	0	0.0171893771840648	0.00946542187179705	0.0175222347713669	0.099758666121056	0.103345836528891	0.0379061104707991	0.0451048972303881	0.036944878486635	0.0636391502816766
CFL1P1	25.8640330722419	1.29120372309862	0.0060104242127617	0.0237491958297036	0.142952355516728	0.224664619249275	0.166035554649742	0.180801361143232	0.285930401126586	0.558571246962361	0.130376755746656	0.304632131809011	0.371681597392813	0.346235728644414
CGRRF1	527.546135292729	0.546268815395039	0.000374516875816114	0.00229038973793964	7.43802252100378	8.26120861138917	6.62016113057234	7.51822077243669	10.2998916740214	10.9686151770711	5.90541991461597	6.54932219885686	8.24662466219532	8.26482471190606
CHAC1	289.293185548486	1.86911293087966	1.58791849571721e-06	1.89037405243523e-05	2.52605403073876	2.31833474054957	1.15342231773352	1.14015352673341	6.97639250636254	5.81052510680508	1.27560975083514	1.09635348681219	3.43111322478467	4.16146663428044
CHAMP1	1649.322008555	0.547933213284518	5.61864896447418e-05	0.000442444878297877	7.87226856331544	8.40409570724314	7.37549242236675	8.663879997203	10.7262993054578	12.3385220406197	8.23356417049144	9.27043751560923	10.4196253802156	9.22811622494906
CHAT	9.42036570227382	2.24320065794969	0.00110521491367425	0.00576800401778037	0.0261392956439075	0.0183781830841358	0.0455401987050353	0.042151636982073	0.142210545545657	0.165739748832074	0.121583015622981	0.0657604390105798	0.133312370822146	0.278347056600575
CHD2	3623.90439239504	0.418035523155659	4.51274193852671e-05	0.000366405530944249	7.14315760793907	7.25363973923191	7.38321049467155	7.76984402114952	9.17057869487864	10.1060056595861	5.87188826875993	6.31771540240258	8.032035726153	7.83442838773087
CHD5	620.837874209112	0.709286324790658	0.00114893527814384	0.00595385019576949	1.09954380409504	0.858683184472519	1.40351596560946	1.21776630328532	1.91706820696143	1.74016649265807	1.89166602784123	1.74326207684973	1.59325505348778	1.60567719569183
CHD6	2084.52473153805	0.456577521090225	0.00397305146845279	0.0168555727962123	3.84691356642236	4.17179318677608	3.28693906819552	3.48002501555497	4.71442552946274	5.20145060654723	4.141551366042	4.44339687080519	5.4041085994768	5.30745250025162
CHEK2	473.022300234585	0.605467267151236	0.00173968370984703	0.00846025042334936	4.55644873910082	4.73676019301484	3.54784375251793	3.69433718890001	6.12808322048967	6.16910534570762	5.17452787840447	5.9513541600067	6.43342701217098	5.87900072914974
CHI3L1	132.380678080596	3.96724912723453	1.25726241107339e-21	1.04984390619441e-19	0.126157319095745	0.177398988812137	0.3494142192059	0.406876879132346	3.94655552893021	4.1373027008141	0.12036961227345	0.0976562208061306	1.16584018768216	1.40540262350662
CHMP1B	621.023656172169	0.436473880377548	0.00845039593703595	0.0314506814564082	3.36732215217182	3.71102362817739	4.02609090033034	4.58455529863582	5.38027573612676	4.98153950588607	2.66763908337754	2.91369462018197	5.16990601984392	4.44183685956667
CHMP2A	388.569630775773	0.520801076435316	0.00670232546845777	0.0260622980421005	7.22716201181551	5.56525443740837	8.13434692107559	7.34409544365779	10.0872712786635	9.74686239785427	6.43863175226599	6.7878991532218	7.02077505024736	7.40274206670302
CHMP4C	340.750523361053	0.784104172124831	0.000150503760442231	0.00104645846694225	2.80207582246722	2.62227287439832	3.63610718245862	3.8018263452102	5.49333516015903	5.32133033617594	2.40694099534169	2.60583848251442	3.63566639578844	3.51199055508637
CHN1	122.32323494992	0.880287603789014	0.000377223500574989	0.00230614186559012	0.737854667429865	0.643736116850363	0.556736954883834	0.550051270910073	0.996247169218334	1.24238763702279	0.823907570656006	1.06227545660692	0.634815699071712	0.757036719740489
CHRM3	33.3395540146217	1.25398710719106	0.00257530826117362	0.0116883967680623	0.116898358223901	0.14611492445471	0.218747795989845	0.237380002025576	0.388657017371044	0.447078983162323	0.154393943174425	0.104565087137843	0.294415015262346	0.202857036417002
CHRNA9	86.3708537578621	2.03936169192033	5.89961096135781e-06	6.07156807991608e-05	0.289806232986978	0.187237833635738	0.518549995448021	0.614692852603834	1.50211450799225	1.73113357542353	1.16582940815287	1.29264913575665	0.807814133759423	0.822941959725707
CHSY3	235.665152501198	0.420664844288085	0.00582817978760791	0.023174610624659	1.31711509287497	1.29215679003924	1.33412437787088	1.2897370865057	1.70811480865449	1.7140453509827	1.25060132030068	1.45899288786726	1.49853828161399	1.26120231052604
CHUK	1902.56204050229	0.517147887140497	2.9971281953651e-05	0.000257466609820271	9.20437176648606	10.3987175304596	9.28202277890635	10.8385815970736	13.9272143745202	13.8256494526689	9.15214057965536	10.909525892928	12.1024234222544	10.8005842435198
CIR1	293.384893710236	0.587697568371106	0.00327857648258786	0.0143480474532329	3.22138755150193	3.29950398634447	2.47127753136363	3.09974001201502	4.05692660605708	4.81521663507217	3.16530233992699	3.16166508244241	3.87632753223548	3.48679494869628
CKMT2-AS1	293.439215765468	0.42854174503395	0.00748194471807354	0.0284594956795634	2.05484455416559	1.96070940435731	1.73316258115666	2.03812443470552	2.5369824681777	2.58512312643737	1.42861317812093	1.54470030472852	1.62881445943703	1.91894911675023
CLDN15	523.194680154522	0.546033445563895	0.0129723593324274	0.0443461387423436	3.84503913569793	3.61942099798156	5.69312013484451	4.30442598828699	6.26702355125222	6.17895115907286	3.77728497338499	3.26971218123585	5.32116763797937	5.12085813672744
CLEC2A	3.28163197155983	5.00340741883781	0.00135054375946028	0.00683378245201914	0	0.0205474112514436	0	0	0.178870559130992	0.141182836788102	0	0.0294089307575183	0.231851824519098	0.269707650690787
CLEC2D	446.223468117206	1.52984188567276	2.56527372132967e-19	1.8079023078443e-17	1.22538097064882	1.13337420782636	0.970397103080646	1.01090590124966	2.98128556743109	3.14586549808813	1.08710396153543	1.11771233070157	2.40995139572205	2.13057338017593
CLN6	1362.78975813154	0.558891956502337	1.25917304052816e-06	1.53744766466151e-05	10.7979774738532	12.0754991368876	11.4702801284294	10.9758200075996	15.9410917372425	16.6519551498937	12.8460066242013	13.1785327672417	15.4460530526123	15.3875682435903
CLNS1A	2196.70132493868	0.598854497330258	0.00128392073011236	0.00653986682389411	28.7740197827421	31.0669833365844	23.115138964534	23.2978185245934	39.9491955469621	38.75751978086	25.4289247364422	27.4812053160163	29.7019455781975	25.6438465307082
CLSPN	2210.4131296252	0.540304314671867	3.92425371986182e-05	0.00032506547386105	4.54398595500104	4.80916526692704	4.16037893589112	4.39796818045521	5.98109380052277	6.74294236391234	6.30293903078148	6.86382244860613	6.87822184164027	6.31201743468904
CLUHP3	119.627383606141	0.904960915020189	1.79153402964245e-05	0.000163042552005528	1.14430065187079	1.10095250826992	1.21249069585238	1.04673400634837	1.89770204063023	2.21850226219817	1.09978470538245	1.10101340431723	1.7746959154792	1.76721125244726
CMKLR1	25.924590899382	1.41263280907429	0.00277290553469042	0.0124346710653374	0.0412809040218889	0.0535828465837432	0.0737641978787177	0.088758202940995	0.133889176786884	0.19942641534194	0.124725702920681	0.137405816489082	0.176346150818765	0.225427731387712
CMYA5	202.261785641319	1.41824281452238	2.97549748953706e-11	8.37464700769226e-10	0.19359137046853	0.210000535719067	0.200760261640514	0.266097194099571	0.513450446652258	0.621261428094091	0.27013837259577	0.239341065395503	0.388663445916062	0.363212825848532
CNEP1R1	682.751002195673	1.06139464202259	1.88287397859431e-07	2.76787808880517e-06	5.5396024665946	5.79022070313847	4.02847743909758	4.55929518169211	10.418676325716	9.90655686720386	6.54997432927689	7.78285861877506	8.85856299293775	7.43343631087839
CNIH1	1937.54731904589	0.662765939375018	0.000126730895478928	0.000897201295749914	22.2242426859474	21.1570470230781	25.2890729296124	29.8585252785535	37.0093200911742	39.0815026578421	25.833471574369	29.6511462659358	32.2018233295534	31.6965901350234
CNN2	3403.9481141323	1.02912822107181	2.63064337067321e-20	1.98924058145456e-18	19.4991554028363	21.1325447523874	23.0134570234626	22.0005737921738	43.3456124257298	41.9876260557347	22.9247501130253	21.5371941539331	35.4842743878116	34.8374282027098
CNOT10	1169.85122954731	0.697530128434757	1.01202664812045e-08	1.88686746171791e-07	6.35259336629901	7.03141319023084	6.28219756584054	6.22415682692275	10.1641795396389	10.3385831047671	6.86860808066509	8.12551457459198	8.46325813048859	8.52581917649256
CNOT11	1804.41303854926	0.334215831765083	0.000790908467470241	0.00434654282232008	13.5153861366313	14.1566604191638	14.1600718877385	15.092964459724	17.3907457569719	17.6484152928606	12.2282834198476	13.1517953013547	15.004730297795	14.4749312865392
CNST	1099.56073948205	1.13328280507202	1.87829654952033e-09	4.0259984070558e-08	3.39943325063314	3.4691297860543	2.62355415041553	2.69356334074133	6.3449826582707	6.7253423753599	3.00044622930406	3.15971581718987	4.65888347086838	4.11690838256508
CNTN5	5.47084795170893	2.96600028371206	0.00332939055325618	0.0145157629670696	0.00694107707818751	0.00650690245989907	0.00537459061506971	0	0.0377628521981069	0.0335320689581086	0.0167405672098669	0.0162980057540043	0.0393333492972976	0.0558452221367436
CNTN6	60.6257650752154	2.57024193651594	8.65407719689864e-09	1.63601058081714e-07	0.130293915326562	0.215932857474059	0.102690314942982	0.0700363403645407	0.835445193957334	0.657544966168549	0.312641032661431	0.346520264785794	1.18662277343648	1.11656573739386
CNTNAP4	311.211247930277	0.43048234405435	0.00299036121855243	0.0132479694014773	0.791589701980521	0.807620618735827	0.89330830454171	0.880529727444723	1.10382992786787	1.11587639245954	0.42846512473608	0.51514032654821	0.902808447224927	0.780000791377883
COA7	620.795361620867	0.396900115439101	0.00190526618189054	0.00914186724042552	5.51506989473074	5.71556277781404	5.73958735189681	5.96524755771907	6.90474579250319	7.8320076760798	5.11655786570067	5.65168978692024	6.12625908266066	5.71114439425793
COG3	856.332739924013	0.579918857441499	6.69797933073363e-05	0.000516915014578169	3.04874275642035	3.28892701506462	3.5905943090973	3.89053372809907	4.86415142957414	5.21395035794963	3.31566207202302	3.85643481047458	4.54551224036976	4.52690668170899
COG6	503.019960079728	0.43930795192312	0.00449494334400331	0.0186960355944274	1.31825636087039	1.43858278003683	1.22962653866314	1.55672423925665	1.79991248652076	1.86873270906393	1.38889864680063	1.62108071854398	1.80554578792419	1.65126891304169
COL11A2	312.484095341299	0.661170354320502	0.000825211437524806	0.00451393986890704	0.117961949572506	0.10749128945566	0.141066040613078	0.125146560540568	0.215330947506379	0.164962228000203	0.105484979516354	0.0995724865990156	0.167115222683032	0.197234495527317
COL20A1	42.9139295481787	2.92187425597104	3.85953712236739e-09	7.82522261898631e-08	0.102552250982617	0.0781116832329567	0.054592932356212	0.0413433601463669	0.674170702253595	0.356087344224066	0.128085058218351	0.0515995621153006	0.280883356782827	0.418614758373598
COL4A3	22.6760141691995	2.6204105500063	2.57369586949743e-08	4.47640153254444e-07	0.0220167958863097	0.0278634772805793	0.0230147577005069	0.016568433983979	0.149727664663051	0.116998497572949	0.0318602125113066	0.0376646427016753	0.119773133293092	0.100031224128294
COL4A4	153.515715749713	0.749672804451392	0.0146706448253784	0.0488901250573751	0.327543751043181	0.31513581128314	0.182207769205551	0.216835749047322	0.44081005965772	0.416408134806799	0.518531593690016	0.56901062430754	0.697506069121858	0.604566612804607
COMMD10	829.040950480484	0.782037877414791	5.74279390246801e-06	5.93444491305477e-05	8.989963661021	10.0455689272683	7.29517521330866	9.01879730879178	14.9314537411839	14.7625601352927	8.94231160003533	9.92605473600725	13.593287379762	11.8335248737757
COPG2	886.7064895433	0.388686839913455	0.0006802846318423	0.00381232026985671	4.34502696346992	4.38640566328286	4.11131503490813	4.37620966460361	5.350084967935	5.65914003082316	4.46372388269248	5.19616171217537	6.0226559288351	5.57860283048611
COPS2	1314.04597543351	0.360674494485521	0.00437740710710807	0.0183041908515531	6.28805317980307	6.65139909497801	5.71571619540569	6.56404006904183	7.68487371378429	8.12892488519907	5.79082684742189	6.81244851724792	6.87573372212395	6.30927222408408
COQ6	579.704785929541	0.372954463013788	0.00971237454629145	0.0351745195971047	6.24814125680215	6.50460248489632	6.0456792934538	5.8761421793875	7.21102221588755	8.38588575120445	6.3484863599975	6.42360507623996	7.48629122909367	6.21121052715936
COX10-AS1	111.94227838584	0.807013071938115	0.00185411916523528	0.00894271162668505	0.733621383915429	1.07028336590596	0.990546173890799	1.19287976235756	1.62144894136804	1.7720479514556	1.00474158269508	1.12582954062475	1.70447211382206	1.39314801840675
COX18	362.662086941758	0.403874302061988	0.0126510472986876	0.0434839645641	1.46560962346728	1.75148905166041	1.43300895926617	1.57983009944066	2.10563760593356	1.91718637304716	1.20623643359524	1.26924459590691	1.589797280315	1.52859180876751
COX7A2L	3113.53009056615	0.543123253053908	4.616016436562e-09	9.2419992722484e-08	18.6797196756112	19.1207678789035	18.2129606241039	18.8388633672491	26.3407713915148	26.9354417437859	16.3620945009723	18.3540995241633	22.5327436556478	20.8744863475009
CPB2-AS1	12.5882014587009	2.02984379179048	0.00221641639073978	0.0103528739099799	0.0660635676108563	0.0285836279666604	0.0177071924269294	0.0382424771859401	0.158973390637769	0.147300223102752	0.0630327758683946	0.0664802796200457	0.126708400596445	0.093797985702041
CPLX2	13.1415190241321	2.32414081760766	0.000439074126085728	0.0026277333653208	0.0108392782503921	0.015241898090856	0.0335721286494626	0.0388426110279338	0.127770439481941	0.113455603539689	0.0784268769874492	0.0545382481619969	0.0450438862274349	0.0769488012166973
CPNE4	150.765190193553	0.589416935924755	0.00286296631983803	0.0127670472258229	0.584232937359045	0.671658292501794	0.623552481589819	0.589886460381836	0.826842846411051	0.982121084521307	0.893583114231729	0.997077366758997	0.850045124059327	0.851921147783939
CPNE7	93.8658207241233	1.1764662104852	0.00940854398446414	0.0343634196646504	0.415985689502065	0.254735312993057	0.81045670900784	0.670809114847564	0.994697735676799	1.37755553019629	0.166442587690123	0.121531825260652	0.35739511849898	0.476308349270085
CPS1-IT1	14.4402056454553	1.37303070166005	0.0110145232207771	0.0388829662646506	0.10827678733537	0.0870033552338783	0.0988120233362762	0.0582015661467583	0.241943017074747	0.205496059619992	0.13590103476817	0.0933940881323359	0.0964193208877066	0.109809222039967
CPSF3	1031.32730018657	0.375905498329918	0.00724331424789958	0.0277555358272603	5.48333238869879	5.80197001206322	5.23372708875406	5.90547701687602	6.47792264257773	7.72518711594698	5.41778226205704	6.90360808120149	6.58930881438591	5.81621021998234
CRAMP1	1873.96454316101	0.530458150909677	0.00595161847259272	0.0235538108420061	3.72431648710013	4.06743945651214	5.4509752242934	5.14528674823876	6.65501983848763	6.2994537938051	4.12094536918088	3.90445428941534	4.76338496469214	5.01404392466085
CRBN	595.910706652476	0.50247822929549	0.0112455975729809	0.0395402481816703	4.91945377647187	4.88585876959259	3.5481632547213	4.05341160404787	6.17636151688643	5.88325391277938	4.03237039695639	4.68738175798238	5.16997482440639	4.75741779477553
CREBBP	5309.7465389834	0.483300235616253	0.00032448801947251	0.00202807889857615	9.14429266971636	9.19760650253173	10.7427107417322	10.6275593336412	12.649004564989	14.4436854701519	10.8940205133947	10.6887156879829	12.7237508377886	12.5065660432434
CREBRF	937.010097701774	0.770423168143223	0.00500051533331908	0.020397909992807	1.42435905658189	1.41296180551484	2.16777828426531	2.53229834320297	2.99502494142063	3.26749693613423	1.77687159249718	1.97702558278071	2.58612293892229	2.5395289225698
CRIM1	5648.04862029757	0.989918876166291	5.98179224123544e-15	2.58951345204735e-13	14.3098924130581	16.0209018770568	17.3549252273119	17.7577161500389	31.3813889482822	32.0480762003689	20.4396797584083	21.9103609897659	31.8601017246846	31.7526839713089
CRIPT	989.540995839216	0.689144225298761	0.00209692028058402	0.00991585267650921	3.23159873893076	3.25259774839848	2.20196327415401	2.43550737095141	4.57057455523741	4.20393741508964	2.91189773291452	3.27452690850521	4.32267700836939	3.86464294080527
CRMP1	1272.08303877042	0.472198012795221	4.26761098856968e-06	4.55427244140576e-05	5.1844816885283	5.12614683664748	5.44385569556019	5.44824228093788	7.00395462624442	7.35985174030324	5.76860061121516	6.20665001055827	7.13997329729139	6.91404298611424
CRTC3-AS1	14.4434121920298	2.02769902414076	0.00206527662011567	0.00980283102635183	0.109033636875504	0.421630365434821	0.221619682586991	0.20512937304018	0.704420584549166	1.15223760146253	0.253576809342119	0.164582089560424	0.617866373773044	0.425720615416415
CRYAB	812.573317256628	2.3726316372853	3.16600713878702e-12	1.01791751420234e-10	8.4395401331801	7.99763046514165	3.99550799959272	4.61865295284073	31.8162555435401	31.760084124802	24.5266333234921	26.4168368846501	56.0901319701881	46.1937072448471
CRYBB2P1	733.594007661687	0.697217791842258	1.09058360629328e-05	0.000105518904773648	9.00257542897525	9.75324421614159	7.84909546039467	8.32481257250567	13.0846018604816	14.5735301345427	8.54423764775951	8.68885977550743	11.8856332198269	10.7247250716956
CRYGS	62.1971876942499	0.814769440025299	0.00213585490025495	0.0100673160747972	1.28028506585807	1.03653752515443	1.149059986477	1.18868533626486	1.9260321601023	2.08509690131286	1.28324397676505	1.26884015727487	1.5829212082821	1.62497335705389
CSAG3	154.564756406577	0.525010193102956	0.0065492538407765	0.0255686468913453	1.28393903146196	1.26149342022944	1.27139712642011	1.5572623238634	1.88064582945974	1.8985702117015	1.01235604616086	1.11810962506077	1.69767771785452	1.50744335768577
CSF2RA	182.787928856855	0.963136376611656	0.0100337171526883	0.0360931119871816	0.430547641173866	0.419979071575416	0.864986332931846	0.900702342196569	1.18174611738027	1.30231644160826	0.958214311019952	1.01485126591436	1.0638432902993	0.963757505230016
CSGALNACT1	34.2133677162262	2.55082231483723	3.7799329979163e-09	7.69037407509091e-08	0.0510697758968752	0.0923309087541848	0.050842505450107	0.0392161740969563	0.317536622261961	0.339234594021749	0.0490168936413319	0.0954421202812033	0.562262193051664	0.445416044300851
CSMD1	1185.86304842772	0.649226159638397	8.67526644664825e-08	1.35504893194588e-06	1.54026671378447	1.53555194484665	1.45924151970783	1.47381460177286	2.16946820967379	2.43320242112735	1.32565334380293	1.42468059687728	1.75977336988936	1.77320379669295
CSNK1A1	5818.66434806732	0.426662717713117	3.07270958080607e-06	3.39545014584757e-05	39.4107444395301	40.8978026025156	38.8257974296309	42.0668812755116	53.6641542483349	52.1659216587394	40.9999678772932	44.1778958663468	47.4203046764949	44.129026168041
CST7	8.32292204544916	1.93114952732913	0.00983805968599098	0.0355271108029258	0.0383376336110644	0.107818674093596	0.11132048572342	0.144252268783094	0.417150933600593	0.324113286604944	0.0396270569437864	0	0.0434499578975882	0.0816484699361687
CSTA	13.643639993042	3.47452686084061	5.14289892936838e-07	6.80786898847043e-06	0.0215562268792563	0.121247118388204	0.0751110411531659	0.115870279813679	0.850253981197702	0.911201198738204	0.200531116456767	0.216921980194512	0.537476504585644	0.489693362615957
CTBP1-AS2	307.317002548751	0.617759434045093	0.000330140899939877	0.00205829883794787	1.78878426312922	2.17311665481138	1.96455961630941	1.75951194936454	3.02051801217409	2.733550283614	1.79863559827787	1.97762512872145	1.84113635589593	2.22875243190948
CTDSP1	2068.02855027903	0.421766868708803	0.0033392172116892	0.0145447881465394	13.4407882095999	12.9757641168379	16.236773579544	15.0562008309722	19.9208327580866	17.828395959945	12.7262721005081	11.4089725335857	15.3275978276246	14.7313811333034
CTDSP2	6208.48842942375	0.432019996608679	1.99927962619813e-07	2.90637852590635e-06	23.2745329819553	23.4599044685904	24.5497595160952	24.3417698678924	31.7576403291114	31.2533661514785	16.3453321365272	17.7607680034997	25.4927481066426	23.5211025494403
CTDSPL2	1220.13996136156	0.913079580064723	2.27884681681012e-08	3.97928662689568e-07	4.49149682900902	4.41284534295468	3.44527082261694	4.33314907629527	7.76059928277262	7.59350178639905	5.23233253318489	6.05097499402333	7.94655513329906	7.21836801302731
CTF1	111.553982008214	1.39464592344444	0.000249732988344039	0.00162303412823077	1.30702761704067	1.14492546348188	0.709266700504625	0.575869719987456	2.30228959522503	2.51015278027404	0.841598673313348	0.743883350711506	1.50560370935994	1.49067338741635
CTH	192.676988765194	1.19526904973517	0.000600886313922955	0.00342621875890244	1.75770884193906	1.67509409669479	0.851445659028473	1.13735884285523	2.57198404183473	3.50120240576849	1.02465569905814	1.04786493937419	1.79383354217379	1.655861493098
CUBN	407.028766125125	1.42170433016414	8.78753423724923e-08	1.37015544890349e-06	0.557233793821424	0.575596131160024	0.383469361111781	0.367784483398207	1.11146008669214	1.35681284864322	0.640830580216809	0.721606882242635	1.09546108131056	1.08387950411368
CUL5	1520.35723779121	0.353055506992172	0.0100874332188993	0.0362271679339151	4.28439712396077	4.39972609608569	4.72983959491268	5.41011343963866	5.90322943700581	5.83177734705198	4.57563147416205	4.97709432196911	5.94074600488913	5.6986464581408
CWC25	647.458133169185	0.386327221098116	0.00350673869616221	0.0151694645439926	1.94879002157112	1.86451804147804	2.08342166199881	1.97601288861882	2.35315392231507	2.6712384635929	1.82835179580621	2.05022260138128	2.20238660815368	1.93762976092308
CWF19L2	521.4198848979	0.513597540803958	0.000345425541743722	0.00213996224331316	3.20766385519839	3.11150094016218	2.74054128988635	2.94575538814151	4.1335821868508	4.24172832149432	2.96151523005782	3.03641156082886	3.68469954028129	3.28063004394334
CX3CL1	44.1939441664694	1.43426864239441	8.94082260279568e-06	8.85488214944671e-05	0.193421334131771	0.196432756147013	0.19969244455268	0.144401328218675	0.460384139535464	0.506139193367834	0.399853485978894	0.286555374138206	0.5419459034333	0.533987883548783
CX3CR1	3.05433745191239	4.91170600460778	0.00197270944080117	0.00942695081027278	0	0	0.0056619114970074	0	0.0530421613684101	0.0470995517860225	0.0100774303958768	0.00981101873781033	0.0386736704830871	0.0207637618377459
CXCL8	283.188695568406	1.34938900130141	4.99821606561108e-13	1.79355537393079e-11	2.19570083408823	2.69056600351748	2.05234495497359	2.52909821892438	5.51776916717148	6.23812845127957	2.53973410412449	2.27268077220564	2.53589754275015	2.19708610010054
CXorf23	320.916121688996	0.536845700181502	0.00604177311054225	0.0238623627963784	0.837528479188109	0.949890490570433	0.797350983693625	1.12769696786995	1.35202974147004	1.27683261012345	0.86569737385282	0.925710874969019	1.19818680108067	1.18523595298591
CYB561D1	1303.23413295274	0.340472896718138	0.00534102113693854	0.0215290440200687	5.31664251107716	4.61302730244257	5.17539882376047	4.92037739544031	6.12637349510207	6.26664810895647	4.38064550961473	4.63009598048026	4.84635117946136	4.8099292547233
CYB5D1	427.170233128685	0.767610893081137	7.42963284503135e-05	0.000563992680295594	1.8229468412273	2.24378822361714	1.71584340703891	2.15828323379054	2.94311617346594	3.64844199343915	1.92830626896975	2.13462751591358	2.16799710242787	1.8689150435854
CYP1A1	67.6954409298871	1.01108568566793	0.00337220210337352	0.0146414068160025	0.252300180971139	0.392122663882298	0.508964723553333	0.478231384297665	0.740501168444628	0.858007798618195	0.391178824690897	0.347430645671688	0.248320150442641	0.235670630169574
CYP1B1-AS1	6.15554703993022	2.37717912871382	0.00453733055109396	0.0188352898183784	0.0406776945331316	0.0285999335159854	0.0236230580086207	0.0327979651132616	0.124484929914324	0.19651233414887	0	0.0204671394889745	0.103729648489108	0.043316073611316
CYP20A1	1062.3096986202	0.481281837050986	0.00762974321261581	0.0289031274270217	1.64048146089271	1.55084792552475	2.10405178681772	2.11562210469419	2.50600764466503	2.54201355499952	1.46665013872683	1.65738661130121	2.30604804875727	1.993795498158
CYP27B1	253.074084254348	0.921802188906079	3.87877036845181e-07	5.26502735914887e-06	1.50529550547665	1.60264850605349	1.99812886316584	1.66450662031983	3.09057767226555	3.16852434070282	1.71151601190865	1.41380448788456	2.19346289265871	2.16777180132096
CYP2U1	82.1619125595093	1.68488834897751	9.87938016408105e-06	9.6488247844204e-05	0.292614892902631	0.263760960929726	0.126359995789589	0.173420160793529	0.663320021468746	0.684151467621637	0.271435333232375	0.245383860382071	0.786570418379635	0.69775765237959
CYP4F11	127.474201670157	1.22924202576449	0.00743964444801979	0.028335299509222	0.614361990164936	0.945120395000127	0.329338132137269	0.344348041576476	1.14985289558205	1.40787774358209	1.50343536661102	1.64334852842675	1.47589076428568	1.4761658570492
CYP4V2	90.9483578630056	1.59922769867075	2.05108581325688e-07	2.96938604876703e-06	0.231174952673861	0.165200487570067	0.259700469882825	0.338156967546376	0.716479341870597	0.759788161839031	0.376052683242055	0.396620443719592	0.966401327601014	0.877061476588989
CYTL1	312.15962018191	0.944368696236643	2.15915970298362e-06	2.49620963299662e-05	5.94826960652788	5.23394497591717	4.36451926343789	4.99705340398466	10.5126410976443	8.84014710568058	12.7384559274441	12.9214204160481	16.066500915298	14.5645862055967
DAD1	1697.87121973834	0.53894423334116	1.20850191646289e-05	0.000115469605564857	41.8947279663406	47.3663523014985	47.2634520203568	46.2213362075579	60.9129389170744	68.6686377940351	44.678511763665	51.5276533998516	59.2212951978757	49.7141953460698
DAP3	2076.82556512321	0.460126443256904	0.00339271562201231	0.0147232158975948	15.864984333921	16.3048388678347	19.6502499616355	20.1158436365863	22.6282507867121	25.6480561450158	16.955447098275	18.4735043937044	19.6847711828316	16.7712660010067
DCAF1	2213.38455772496	0.792403928966673	1.09900106579895e-14	4.62131259625578e-13	6.2176154347276	6.24920700270534	6.44872283519001	6.68106372875086	10.3517001692717	11.2943916775311	7.19745158914338	8.06243802938618	9.03651965566805	8.49886964599697
DCAF10	1374.66617342978	0.365937673089781	0.00374850783058741	0.0160771566375656	3.54538208469832	3.55609931919245	3.17236300725076	3.22085838387435	4.29274463930672	4.2066848618279	3.39564077907389	3.86766883754023	4.26519748904111	4.1053441527481
DCAF13	2259.82492334885	0.528995144723423	2.77132258727395e-07	3.89688209618353e-06	15.2214631441582	16.3448782481949	15.6722889355424	17.1330683255858	23.0992788364577	22.2559426451369	12.5030041689202	15.5212563939292	15.8742060304564	12.9957405612904
DCAF4L1	107.702036465601	1.42658222230174	1.2366336207429e-06	1.5109741861213e-05	0.388518013711457	0.357211491496178	0.221287956322791	0.277112563998658	0.833296578907722	0.80310312334724	0.490397285795328	0.406005942645706	0.491133849328564	0.397805307212054
DCK	1123.44040255105	0.880782984994061	0.000351107174696188	0.00216678014394821	5.79634114621334	5.60056962954895	8.52864487512808	9.21094442995798	13.6732027580883	12.4801833940039	9.76856392411002	11.5005288916253	14.0227441856662	13.2433504806639
DCP1B	1321.51000655932	0.488346522620899	0.0023739747509652	0.0109580982806539	5.47264985086665	5.18339987716374	6.21996339919974	6.80308184434356	7.55754878160036	8.65064537713407	5.46165435506103	5.79835361682108	6.94862029581685	7.47243877409232
DCTD	1336.25086586255	0.450134963649101	8.69964858469384e-06	8.62572360234782e-05	12.0214390251384	12.6075775971517	12.9181917624703	12.801657198596	16.4693670653997	17.112542103982	6.96636674910893	7.73100589159444	9.83496818797466	7.84617005659862
DCUN1D2	829.278093966313	0.349851234855306	0.00244282368567275	0.0112143559494046	5.36163640216277	5.6276435702204	5.26355891888682	5.39706090189789	6.54001838187245	6.93038066851466	4.66595840022652	5.11117313261155	6.35676183312207	5.54853781830999
DDIT3	493.102604418393	0.60297468279033	0.00056974649591687	0.00326450845904369	8.1114361640252	8.36304057607567	6.76711373739735	7.54884053180705	10.3327188487252	12.5015124833335	7.05465895328197	7.52299422281033	9.22739895351413	7.7995775228498
DDN	34.5923762869254	1.07184335588095	0.00462664932859058	0.0190995629148166	0.128560093479411	0.174082234213619	0.132728271439462	0.148446416707878	0.362667278010131	0.235776091617951	0.177178668065968	0.138954055849492	0.215857162632249	0.2974586351307
DDR2	616.685394604942	1.85877137522197	1.75762512567529e-11	5.16126618154548e-10	2.71471572650974	2.61187746721494	1.85099475953183	1.54784691790069	7.29499767668361	8.19667771996891	1.40301036537564	1.68113197277256	4.52789011007065	3.75296034284282
DDT	534.390792645823	0.648070114414581	5.0674820050814e-06	5.30196488878858e-05	4.62729404850558	4.07973634372831	4.54396981282097	4.62998192869509	6.40547374960869	7.28598470994753	4.28169528139501	5.19408630455976	6.02680363452232	5.25125014112288
DDX11L10	32.5749466486991	1.6934091489898	0.000215873269569463	0.00143137796858343	0.377690670109003	0.182090860000687	0.188004936542579	0.22042006134532	0.645801157798738	0.899271428633658	0.278852625285422	0.347495356166318	0.550357366227018	0.505607655839592
DDX11L2	145.736720783097	0.642241540987748	0.00185504248760639	0.00894471636265378	1.22198088564204	1.2832994896997	1.05998352306187	1.03099917174258	1.73567816597101	1.76539796673539	1.2311034914293	1.17520894233189	1.5777707054352	1.70204294161948
DDX19A	1155.24781369494	0.514522315570839	0.000250789311449661	0.00162869770675694	6.02249058214818	5.93632942570184	7.18737913039446	7.02599725895871	8.78732005419099	9.46149307749761	7.09224538934566	7.39948444863027	8.01264893549364	7.14717811473621
DDX20	1176.02925094509	0.330237322825879	0.00526963093870231	0.0212851048851435	6.47054060613408	6.97757303904435	6.22348117193921	6.96708515748972	7.9717721680703	8.37906058276737	6.51492524651456	7.6664306675582	7.20099494541183	6.64865119007286
DDX21	6977.74951756425	0.578574902607465	3.25082567165876e-05	0.000276563483867483	25.407291245999	28.3579647496522	23.0891679584086	26.1194410906457	35.4359166775526	39.6860567730068	25.0617655684405	29.7942750225128	29.5639276863603	28.1743323096408
DDX5	21791.0409719118	0.661087131446621	0.000202022152585249	0.00134724765571518	93.1437356060372	98.1020344499211	70.7637762627867	81.8865801105072	134.39118758042	131.539533792167	88.9678520965795	100.674173629889	128.016052636898	116.897556102624
DDX50	1618.75700415537	0.393026355466894	0.00123379601671644	0.00632477509994968	11.6107290728828	11.7635143800522	12.5963208715503	13.9093094428441	15.9162064987708	16.0587132707176	11.4131544857246	13.9811771762831	15.8974973023995	13.2139909481014
DDX59	282.75421430356	0.460018880057603	0.00665312293525521	0.0259110019885635	1.69903534371634	1.86425104538368	2.12288568153571	2.15173201135299	2.62601783561745	2.63494574182415	1.94244108008206	2.05947450842722	3.01969364435549	2.38490169766621
DECR1	896.923030996496	0.473557398818282	0.000488155116326711	0.0028746005997862	4.83984075038062	5.09890567889015	4.55229730979601	4.95298276316519	6.09439762886909	7.08517555399014	4.0564616248499	4.92126127260634	5.7775501463142	5.11964859857911
DEFB115	12.014309596451	6.21484827562166	2.19730122530198e-07	3.15262624499964e-06	0.066767788873202	0	0.0775491024140676	0	1.99787174659834	3.54807803313919	0.207040241335513	0	1.81611059976436	1.23237203686427
DEPDC4	70.1412497911941	1.00401831008839	0.000309507888011856	0.00194733986396263	0.260248169768539	0.291619509138873	0.198365792534524	0.284151774241986	0.536484741675831	0.476379359760036	0.411908071379641	0.392834622527435	0.460862920218488	0.588897039092531
DESI2	2000.82937605078	0.509882342432582	0.00460377689132112	0.0190408321709359	7.89071052920892	8.561989886655	9.01320879988854	11.5335907356238	12.6206998459764	13.0727689334794	12.7357549234997	15.2327635050136	14.0038599045734	13.4403029429838
DET1	278.635467222028	0.720489163031816	9.11391118262097e-06	8.99596644966941e-05	1.2747211839801	1.34939372980155	1.34192761204675	1.33446317972883	1.93507648865272	2.3237129598031	1.33239876788762	1.50376195756105	1.91545194684574	2.12167944239594
DEUP1	13.1452331745355	4.15456990355387	4.05229560478322e-06	4.36414402571366e-05	0.0133685786495275	0.0469963286965901	0.00776363342503039	0	0.28183496006058	0.274478068521301	0.214182236912141	0.141255494189655	0.628778074637202	0.246751656425017
DFNB59	38.9967689816432	1.30394064514228	0.00199072735854302	0.00949623542597489	0.491295265370136	0.444115306182777	0.217381735900851	0.326960991673718	0.811411941464736	0.974800787469031	0.374818914596247	0.37668131783908	0.729155297395551	0.797197659219285
DHPS	722.984607025949	0.39207825322974	0.00667519311982487	0.0259797277619161	10.0720801301178	8.41598344059781	9.21000695273852	9.1881574803318	12.5431373143718	11.1378595867191	9.29152247007214	9.86611039560847	10.3462551607739	10.382314909976
DHRS11	589.321163960324	0.72772328495043	0.00700848388783343	0.0270439066184269	3.79855655427024	4.09430956863872	2.7080554205333	2.42859900934885	4.87820883103525	5.6790089300333	2.87699128847042	2.98055280402621	3.33154863347731	3.42126504813883
DHRS12	98.0113070096896	0.831874679114523	0.00208787479819996	0.00989324572316983	0.538851374180703	0.45102270109322	0.722721915589038	0.703427246016776	1.0819054889983	1.02267380516175	0.543713451337379	0.684268248571837	0.879709205148543	0.865256365462457
DHRS7B	160.789705892639	0.684836318160562	0.00288728995759587	0.0128565224928002	1.41963292241246	1.52586862684633	1.27929400298172	1.05253698569424	2.15281382838155	1.99045184771509	1.40834741737745	1.59279307361314	1.97881249903387	1.51750314146811
DIRAS2	64.7443058579353	1.39709420009301	6.82727883662133e-06	6.92514829144682e-05	0.215419740160666	0.194324354471017	0.155787765930312	0.257804768032323	0.597050840327798	0.466344356581766	0.16804907869458	0.179967100212447	0.534357211353377	0.490523753492486
DIRC3-AS1	22.5985473406525	2.33493426559861	0.0039233619944928	0.0166809157772608	0.404011323040112	0.260383625112722	0.0586561199562495	0.0542916268588741	0.915841284817165	1.0165430882996	0.365399632725283	0.406559722653511	0.896693890322749	0.621422726804079
DIS3L2	1209.3990147525	0.334578928710353	0.0040838276387039	0.017263185980404	5.01925232276896	5.01965277295582	4.67802725624375	4.69820236019281	5.85083926628896	6.10985574475937	4.60664536971517	4.73160191783179	4.95706543332224	4.6639046105731
DLEC1	7.5863456740781	1.93125464987398	0.0145510428074758	0.0486295188211145	0.0126724717463266	0.00445492122387794	0.022078134364197	0.0204353413341204	0.0473993030337443	0.0650464731425545	0.058944102829126	0.0414453209360441	0.0682211441310098	0.0629739398476937
DLX1	20.698941786487	1.72949908024741	0.00403462596272504	0.0170838920541342	0.134712843545176	0.147334082357119	0.0695402530463679	0.0724116282664328	0.203584366209357	0.479055532468444	0.170186730703163	0.112968814622709	0.245979295654483	0.286900794863867
DMBT1	707.815478278135	4.27152568625377	9.76747929801917e-86	3.441864355036e-82	0.282968248081665	0.355502829588468	0.2640059606774	0.219426892628684	5.61218209336922	4.9385980408219	0.196588561184826	0.224068043866806	0.854329285359488	0.73766195060728
DMTF1	1605.12186763655	0.644263398564398	7.84351018475872e-09	1.5037519689365e-07	6.409211708182	6.73253831157724	6.29745150281297	6.82551595065979	9.55792850634868	10.484065192668	7.17649391229828	7.96411323431651	10.5251213861738	9.55573842091761
DMXL1	3289.65522251008	0.427320246776511	0.00623594695764412	0.0245029325260329	5.16000922972449	5.53747297403322	4.22103167621669	4.88219946907809	6.45036914994649	6.56365072103229	4.96795088890852	5.60991600963464	6.96112140602958	6.7216410400377
DNA2	1516.60283125185	0.499056887252832	0.00889713542483672	0.032822158511348	7.23772072601962	7.70250638524703	5.46417952345378	6.10095112065327	9.13943053226835	9.17834995700644	7.29412083453862	8.88075084139261	10.1836778484192	8.68807525078568
DNAH1	333.535376835291	1.37240058216773	1.27904398411407e-08	2.34013249803798e-07	0.285558346462276	0.288729527135083	0.409058205891687	0.454637503542927	0.92289871165154	0.893404129667501	0.468043602781129	0.49398479344875	0.946254575083174	0.976916780639773
DNAH10	71.7985846652662	1.24113774093958	0.000904979938422122	0.00487609832876433	0.0326029680185961	0.0309189949845217	0.0528384067996497	0.0652090652643162	0.0959068354646438	0.113549142721292	0.0532922567438978	0.0404385305967407	0.0842129372827958	0.101192429990641
DNAH12	10.8757220385795	3.58339214397503	7.84343833776498e-07	1.00504392780423e-05	0.004213424634636	0.00197493435174988	0.00489378642036305	0.00452964884925137	0.0439359217172688	0.0491909789407848	0.00725856041867985	0.00565333577943313	0.0302434710490185	0.0319054920730636
DNAH14	1154.22927409	0.730684916188824	3.02918749003812e-07	4.21022799189746e-06	1.44396600717498	1.51894786972697	1.22884510449119	1.45556538844424	2.33127123480618	2.24730907925365	1.55498577880681	1.53993599451815	2.00127674931494	1.97137821926534
DNAH2	15.0916497237308	1.55519163031406	0.0024761432648311	0.0113376216691942	0.0100528193397434	0.0109946674240181	0.0129734400655113	0.0156105435874294	0.0334230423773031	0.037772601070501	0.0219364065224532	0.0123642810390318	0.0215207968158167	0.00951542318804974
DNAH7	70.039646945007	0.863307207667466	0.0133132813546162	0.0452831475264444	0.0676027902670495	0.0768579946439345	0.101907554543966	0.137621433034149	0.174114404016667	0.166767527075828	0.0832571052780537	0.088293231683658	0.125522490118053	0.167460392591367
DNAJB11	1093.56480705567	0.531575935937366	4.81953747498852e-05	0.000388096118701201	12.5769429672205	12.6006300814589	11.3140058890419	12.0928418379786	16.1454802871034	18.1563131887195	14.5364043127145	15.3190789878489	15.6997982111209	12.3486671710084
DNAJC16	949.178920446345	0.353327194582298	0.00843980850282636	0.0314179137991332	2.66598406900373	2.92902548196479	3.10962174725354	3.20987715774688	3.52598167681053	3.90001056647432	3.0160034139872	3.42612409236223	3.52186775738556	3.28291919046411
DNAJC27	346.009916260433	0.625691871189604	0.000262565075727891	0.00169269450027432	1.08204745345171	1.25540072750206	1.31069168046469	1.42431777410231	1.79714588656806	2.0184733697049	1.28823656572964	1.37995752016048	1.87795731490057	1.61743132852318
DNAJC28	61.2506517398112	0.814357140844854	0.0044544056572476	0.0185537052659682	0.294005491266003	0.216554653660502	0.276436159050356	0.31607107060589	0.437967529599968	0.512896549090808	0.294246458170288	0.291163811845378	0.35965645778056	0.258410995164471
DNAJC5G	7.47714953006831	1.98593391541877	0.0102291352890172	0.0366166466186905	0.0263843112419511	0.037100900434279	0.0408596158748023	0.0567289914588531	0.107657662624475	0.201814143854724	0.0636339764933521	0.0265507366977102	0.0897079791817498	0.0998955132914151
DNASE1	193.713017452236	0.507553569551609	0.00255302027929728	0.0116291789816284	1.16813457866895	1.09236882928107	1.19635385786815	1.27436362876811	1.62011229477587	1.6679444242881	1.36206815967046	1.19866548959065	1.96955377261405	1.67487419768997
DNHD1	2982.84746075353	1.06023011483266	9.32670087878193e-16	4.33580851670867e-14	3.09471256317171	3.24858765234558	2.98699557394042	2.71829311743303	6.03389005463109	6.24490944586249	2.78514018526147	2.71036682068764	5.27912831890847	5.18327190428327
DNMBP-AS1	13.3022904109008	1.81665415472806	0.0103904778762315	0.0370811889206649	0.080695584892395	0.00945599461590388	0.0624839240876833	0.0795225903783508	0.237804356244397	0.170553766433005	0.0486556281976706	0.0744375425812705	0.106699066734553	0.085929547763829
DNMT1	3504.48244854949	0.333304288650368	0.0100234929281176	0.0360636965285897	13.4835638314458	13.242349900656	12.6195525275399	11.5263100048524	16.0418931995954	15.2922033428481	15.1774092554069	14.7335138927688	15.5587726501214	15.9773824076116
DNMT3A	876.672238986027	0.431273688376478	0.000648188708440887	0.00365144282850944	2.76358057706455	2.64153979070424	2.9987905167769	2.74099975745994	3.49174464271053	3.84736575657927	3.64109007686841	3.60381475674327	3.27160397271788	3.13735218853856
DOCK11	492.580812142422	0.568830952733178	0.000120317406492151	0.000857553553796608	1.30520063569817	1.29153387625073	1.48164581405003	1.44069105096567	1.84828719431462	2.14719995298928	0.996556606042631	1.21343959704379	1.78362142625999	1.84932923394139
DOK7	18.6972110569282	4.30240062694781	2.48245669759327e-10	6.11725937830711e-09	0.00927523393816073	0.00652129077179011	0.0215459004625974	0.0199427099700131	0.346924919577106	0.212839370235965	0.00958719119607735	0.0140006095958009	0.0946087792931357	0.230459390948863
DONSON	769.004602870019	0.520282998134166	0.0136100974716364	0.0461146744909156	6.48190272003406	6.67945663774128	4.68790781393398	5.10659895200423	7.68170956162253	8.41750882380768	6.83142493367753	7.71780365656761	8.89242496781926	7.95862147676779
DPAGT1	953.783139618095	0.556074399118214	0.000728542095919052	0.00404161939168696	8.755370499468	8.9762066313846	7.71385483424637	7.75723935190722	10.7084806361791	13.1373529745623	5.81529835654053	6.32319470605745	7.11204002729851	6.90085854213071
DPH7	775.276359074501	0.428420263398392	0.000465471528624173	0.00275761360552431	2.77818921968419	2.72644089495519	3.13528457946006	2.89094566885632	3.80663252857257	3.77319541515934	2.5954427794014	2.58543155679566	3.09042417682808	3.07389858376137
DPP8	1870.94309616326	0.532826409440987	2.27917365116978e-06	2.60927618973102e-05	4.35539579301813	4.64349043801522	4.1432265649442	4.71636349544538	6.2904542939552	6.32699466107981	4.72662533424212	5.58627702513953	5.70626403620219	5.51176445380306
DPY19L2P2	77.83262371417	0.982420511918064	4.98737185934722e-05	0.000400330317949151	0.185492980533433	0.225266747347531	0.202388119401305	0.187328794802667	0.386084928199429	0.383561916277939	0.212066915963555	0.214945298741692	0.359936628997127	0.367115617622502
DPY19L4	805.351969245708	0.686346017719114	4.36558858501638e-05	0.000355933851362349	2.11899369990317	2.01057440862698	2.38144411566357	2.76683507428044	3.60553007064492	3.68164707450398	2.8228080385486	3.29206420273125	3.94750604017598	3.50391645204094
DQX1	38.6824181471976	1.32317561634333	0.00125464456382783	0.00641671482440713	0.270721330738723	0.256959653235593	0.141496198254369	0.174623638097335	0.441856911444819	0.58852982077956	0.24484827325745	0.204321728497565	0.391198083349015	0.355545918818472
DRD1	68.7269787539077	3.32328517676627	2.37051316474161e-27	3.42344847947397e-25	0.110989324699687	0.0891829530747507	0.135049934058771	0.10227364276943	1.12859857350694	1.02130483772004	0.169351919906517	0.223378833681476	1.42561720738989	1.05056139793351
DRP2	176.694251793176	1.26581540799078	2.21856817540358e-10	5.52884762127802e-09	0.333097913834824	0.320479572511277	0.415973908298892	0.390406985216559	0.803915135103418	0.910458719537209	0.735199373418999	0.753567698913145	0.811802458668202	0.83208485658467
DTNBP1	217.765892698593	0.499007952235176	0.00880819982993792	0.0325281225746544	1.67955704090068	1.43076813608567	1.46509596261323	1.8805320619925	2.19909317420015	2.26414109544172	1.46951627118357	1.44469360398348	2.17997169529964	1.90970600323728
DUOXA1	23.4762363223388	1.75735720928258	5.03527496790845e-05	0.000403807508691757	0.0867230143102216	0.099082378366645	0.0881357691771921	0.0699237857629038	0.324373217599123	0.242208621640883	0.0896398004444423	0.0927244183507039	0.0921445595426202	0.146217539654617
DUSP2	342.024921127342	0.696792132559966	2.83678882958221e-06	3.15937941772496e-05	3.45960170844534	3.67463317893769	3.63730603085376	3.75337187702685	5.32424466809955	6.15883941727563	1.4216353663216	1.33081956692034	2.64993170524965	3.53002435302664
DUXAP8	2411.58991053794	0.41701150624976	0.00175523974091359	0.00851709418759473	22.4212382616203	23.5449733162128	19.6737692974852	23.2034992222576	27.9178806766429	30.0219573368416	20.9365145042204	26.2152632460671	25.3152198932507	21.995485534157
DVL2	870.159027379132	0.3669791606683	0.00127156148329909	0.00649004686391852	5.63300087751164	5.46904504516209	5.97963747019507	5.62366567932578	7.35607151333356	6.9531142779578	5.36423691592827	5.56146672995709	6.51814197645037	6.60470066655407
DYM	865.917457808993	0.454487944618084	0.000806119989147692	0.00442324138548527	6.33577536286962	6.83928558526932	5.89337767797866	6.24246282522536	8.03616749297204	8.8972585672228	6.0720774584069	7.29046050605329	7.21909146370374	7.55093003549712
DYNC1H1	25484.253419133	0.460223712241767	0.00286763008073346	0.0127828015934465	29.2728284705353	31.5620559537429	37.8317780082087	37.8046568257887	43.6511798583708	47.9388832887458	31.0245037116884	32.0745816716965	33.3440249076716	33.7003774973705
DYNC2H1	2025.71200123864	0.525237729986714	9.37183344601979e-05	0.000690310758718323	2.52068751599779	2.62408095745496	2.87027914769778	3.12817106451012	3.74703869617391	4.07849791031692	1.94636567632027	2.19610583962468	2.60756839088731	2.69572862744943
DYRK4	794.264135614966	0.565144567661055	0.000273364200839225	0.00175460978309155	5.03849020597039	5.01356834535224	5.55682559155545	6.01926403566209	7.05686684474056	8.55704786006278	5.34943535437491	6.13942343887118	6.52297457512257	5.84883664712767
E2F2	648.422962214709	0.658809421166575	0.00267526295666621	0.012092216016804	2.6261611238775	2.5680900825413	1.92981232558543	1.89324406243918	3.7539969197939	3.21318053589328	1.85578704283538	2.19363553416613	2.95301576941754	2.62712167179558
E2F6	599.068841145062	0.369492339865001	0.00143097494278215	0.007156499437093	3.34837558251766	3.36417702014215	3.48094318836015	3.46635513955302	4.22387991516992	4.39344619060018	3.22598701832807	3.93627882779688	3.9295764096858	3.6976107080658
EBLN3P	1891.99491784156	0.604201746812581	0.000277788779350339	0.00177524864104955	6.96781014076293	7.06483402265064	8.31537311437371	9.50581236346654	11.9100763052305	11.7125281399409	9.30805601560734	10.9604900269843	10.5708533569884	9.5632286741465
EDA2R	1302.45423664639	0.334799802390156	0.0103406528777808	0.0369636428181892	6.63661518296357	6.85929094369629	7.17193502427858	7.8476459635815	8.2181550176653	9.33240337443425	7.37266362835649	8.07744768345242	9.06378813106427	8.82991416675359
EDEM3	1273.01992660078	1.15959766391909	8.24477893430194e-11	2.18443248185663e-09	3.11886006349572	3.35285657369429	2.48813499438239	2.64916232338782	6.36304623246896	6.31545034020221	2.3408002445903	2.53332103044238	4.60242657479469	4.13349187851206
EDRF1	1591.25229972272	0.532146684937016	0.00362854316465256	0.0156349479134296	6.71608093015889	7.11026487294408	5.40930313791015	5.5233822415185	8.29512372499105	9.20945040945735	7.19794308649668	7.97474103294895	8.77625186292412	8.24458248882719
EEF1G	19419.8896143744	0.367720431180626	0.0119915791941376	0.041639659799273	258.004671485785	264.662947957834	235.139265460349	235.138165530504	281.992369833462	344.108150156678	232.069494958083	262.349843345151	298.938535430199	264.284630298133
EFCAB12	41.7145847418296	1.02088093375604	0.00583751529270669	0.0231960265995036	0.422087734951899	0.302583047769634	0.23070317932653	0.284715978179128	0.585347584404731	0.649709781644411	0.239528450050185	0.224867729608323	0.309535563574044	0.329019832426158
EFCAB13	39.6562319236166	1.13231786366176	0.000873244417477368	0.00473551658711411	0.117607360822195	0.133367959814648	0.123378823078861	0.146826557591524	0.32508077782053	0.233677274551918	0.199990562975504	0.232880679609972	0.210684675611098	0.210072356145622
EFCAB6	34.1205331923658	2.00279136618252	5.31676391165096e-05	0.000423107783917698	0.0940357050837428	0.0966299437631289	0.037806957415501	0.0699876236683477	0.211527006424829	0.371288805409976	0.0485992207801154	0.123745429886575	0.225447894751637	0.246485946977113
EFHB	9.02640324569503	2.23495354319952	0.000863165301338853	0.00469096528201396	0.0225944228506273	0.031771662518075	0.0262428521477263	0.0303627127395161	0.13060749881625	0.122796858993454	0.0291929364367248	0.0454738853284821	0.153644337812764	0.208519222967528
EFHC1	2675.96410757879	0.596437091472773	0.00990428085252047	0.0357206754654817	7.84195231943607	8.66265294555454	5.45256576294967	6.05840179154753	10.528031404668	10.2000532212147	7.09380132050035	7.98840112325078	13.1705482707837	11.566227697374
EGLN3	103.072007693174	1.41892032791966	2.61625969117954e-09	5.50070161084635e-08	0.425699844193395	0.506514068689149	0.562900501652149	0.605505219758155	1.44305564971219	1.29720159738076	0.55509907467545	0.797455245853206	0.749679380110298	0.595115960151942
EIF1	13055.3553555052	0.526193682995234	3.52209219900397e-07	4.82173601043131e-06	177.691896001816	184.379080211992	180.135686979486	199.092841231742	249.856421179685	271.370501179511	175.677860524703	194.939293215611	223.374070883913	205.103296330227
EIF3F	5008.99825148421	0.736726535825855	8.07616659400124e-05	0.000604991408247057	77.9505429643821	80.9316068487393	60.2045294413366	62.1334817778466	111.987464480984	117.23430467441	78.1515919887666	85.5694518651738	102.758458549486	88.3669168851361
EIF3H	6559.22606438242	0.601203720184244	0.000132218291656467	0.000929795249866547	97.6639940467273	107.034768910187	80.8736780516778	92.8936122805554	137.570243328923	143.046173404613	91.338035252078	108.649737740258	124.568984588484	108.291486341614
EIF3M	3848.98359837014	0.323692984201875	0.00196292698006877	0.00939039111100505	44.8058833702288	44.582865024513	41.5917928723495	47.2215313160765	53.9070569833743	55.0276522990556	38.9207968097098	45.8290310852364	43.4038554713306	40.2621896866633
EIF4EBP1	577.439174919623	0.439560187716615	0.0125101094616018	0.0431341719381532	13.3235550196869	10.710009212714	14.3661743484929	13.4533892916799	18.5732932412359	15.8156826857126	12.0770260449343	11.7786362489134	11.4780726962989	11.3737554278952
ELAC1	112.306811758881	0.98526911940668	5.84658705459253e-06	6.02756098975224e-05	0.854227031042771	0.68479101895765	0.862347407990915	0.866842531302927	1.52018169376392	1.64876642469401	0.808690096250939	0.964054514756087	1.49292343022501	1.02014881827994
ELOVL6	587.755350911955	0.455884579043856	0.0125907041220396	0.043327268735589	3.41088524743958	3.93902112039024	2.93003919970133	3.01712271407768	4.46051425757473	4.4495277740979	2.76507369479366	3.19969513445228	2.88887138999221	2.5967679648331
ELOVL7	944.439901848803	0.638018932073713	5.75143111207321e-07	7.56616404592973e-06	3.78634003476162	4.16216293571106	3.85414270131637	4.4694028054035	6.35420127748632	6.0089525733252	4.14031513834381	4.54426408542912	5.13229505052851	5.19031676081932
ELP3	693.188813797955	0.347533547055547	0.0118693128442865	0.0413057301070242	3.78441274873447	3.96284760811491	4.24586589721249	4.53587660494113	4.85522046983752	5.40690728602672	3.05167714946503	3.9217220943314	3.4373351968214	3.67356650944364
EMC3	812.077069423202	0.407554753840265	0.000294968457630268	0.00186675619791225	5.96482500838914	5.86371165296685	6.11293568083033	5.98451136713687	7.47964492152179	8.01888587752558	5.67025387672738	6.87158256443271	6.65317201645319	5.33620034211894
EMC4	926.367977382002	0.545709181786247	0.001566535113053	0.00775956765726198	18.1505077408486	18.0526768500267	14.0212776831807	15.9250253339339	24.8027008353748	22.4146294604606	15.5050795442944	16.9799357518886	18.1394236838929	16.3421713083319
EMC7	807.459999071935	0.39198755014345	0.00136107637024982	0.00687523066726823	14.5257034015255	14.9026295545608	14.4133071059445	16.1254896800833	18.3751420858466	20.0377729895364	14.3667838500899	15.6054455366296	15.6760268329376	13.8693844420537
EMG1	1564.73970070212	0.396657496157396	0.00439866097621434	0.0183621406596991	17.977977476167	18.1762266070913	21.2316812262744	22.2737854056219	25.8107044673507	25.3735909718734	14.2250808159283	15.5553126849099	18.1509014674006	15.1701261405833
EML4	3204.55295339405	0.686427928851159	2.1827860002208e-12	7.20196751645886e-11	9.89925820082711	10.5347142807842	10.0121176436812	10.9041330166628	16.049780901849	16.4430021480773	14.0626527236621	15.6716125208082	16.2585742025074	15.0700963904303
ENHO	37.6533035490414	2.5181997871863	2.25881483145858e-05	0.000200393043884535	0.214982370295811	0.0697620827275357	0.384148614926829	0.497790760550196	1.68693631833496	1.59780204899336	0.358959379458325	0.199697006628047	1.89297520654938	2.06620617797651
ENOPH1	722.550037953292	0.884354314881157	0.0137065530446541	0.0463968795569183	7.21704640394868	7.50547885566195	3.42100910302569	3.97994050567689	9.98206390233322	10.0330993359194	8.26715179996351	8.22872889132661	9.52577363136331	9.29957812531762
ENOX1	64.7311994937363	2.15272782314187	1.10670917921653e-13	4.25744738616073e-12	0.245378035868512	0.160485542424847	0.225349152277499	0.196311849231063	0.915855942968331	0.895950620782369	0.27132610372202	0.252668278339242	0.821362760448807	0.550944220952124
ENOX2	220.76145174832	0.456235956962733	0.00752619358239755	0.0286067670870846	0.965089504179161	1.05159214180695	0.907417186414807	1.05099530391299	1.26718028063374	1.39263782526628	0.928454421831508	1.06367009229149	0.875974367972821	0.93722569896263
EP300	5522.0467008713	0.618704990493669	7.7636984228125e-07	9.97001476031585e-06	10.75602328954	11.8057202333771	11.4576873587955	12.1582879026153	15.866620970558	18.7460059982303	12.4239032982114	12.4824647366371	15.6218989705732	15.0779868765013
EPC1	1434.50802523263	0.43038547052889	0.000352920278459476	0.00217614795192536	5.3935531903476	5.96374070391728	5.17952027490802	5.740633781876	7.18011936818175	7.47792851146778	5.21981659640081	5.7553177120686	6.65632244993438	6.46368694343105
EPC2	1109.70864666144	0.396529390147611	0.00863334792330216	0.0320031468673808	5.89500344781392	6.55440409884006	5.44226012077455	5.90054999703533	7.01235474055418	8.27864203632512	6.14894163603837	6.86340311249274	6.63116049292566	6.72226361789764
EPGN	11.6623992791178	2.63003342808076	6.25138597530111e-05	0.000486002216157901	0.0431348072602884	0.0433249943428295	0.0214714244845033	0.0198737756113196	0.176005827281792	0.208382548594952	0.101909887197294	0.037205906177849	0.202531172571371	0.139984932901278
EPHA4	1703.45140103121	2.69046239639027	0.000714786742051511	0.0039765796047381	0.757741197814361	0.794429949586454	2.98237914094762	3.35631196032725	12.0141959377062	12.6892792674028	3.97701976346092	4.25718345810997	6.90973755959085	6.01792635202404
ERBB4	30.3784003351958	1.75094239981006	3.96594135838295e-05	0.000327930676560156	0.0179421282856445	0.0336396433471592	0.039942047968195	0.0321478558771828	0.107782067837233	0.0939008551312295	0.068000468428237	0.0767350361374147	0.230460063527928	0.1889357783728
ERCC3	1457.64018228212	0.435490727441972	0.00868732900072945	0.0321829372716258	10.0895248815001	10.4803406089284	8.55336445938291	8.24812324497554	12.361163694194	12.3500965055435	9.54703905800724	10.5943498415511	10.6157820863345	9.76606873204602
ERCC6	1443.63928670065	0.525108072783371	0.0100623317731838	0.0361591318604376	1.95797126447656	2.1128512816385	2.85896481774701	2.86517382345285	3.41772863095642	3.45508703576244	2.02548192562452	2.31403868767038	3.02418273120787	2.83004451925015
ERCC6L2	2236.36519098912	0.538657321543218	1.04947193481983e-05	0.000102101855436723	3.17019897019493	3.30210927163762	3.26466771938663	3.74216703193211	4.55919584372419	4.99781572236436	2.9778539707203	3.39624725905519	4.44979918218168	4.24493346347657
EREG	263.706005347997	1.71770713971537	0.00065315372166723	0.00367430249746326	0.354382879403918	0.335826747419878	0.930589228968812	1.18435048928656	2.14282223170994	2.34005670979329	0.497692887825753	0.418638798250931	1.48868681374915	1.44384416153329
ERLIN2	1056.51663645134	0.454470444182677	0.000104976183962001	0.000761229166196103	3.03945258550702	3.41592757678441	3.28387267567287	3.49873473429901	4.33559040310372	4.51664261113428	3.74839016880491	4.38909716232948	4.78512580337669	4.55474691947097
ERMARD	366.074104438056	0.718061748709861	1.22429531288578e-05	0.000116662299176499	1.52436090438233	1.52866451574084	1.32322082309944	1.47488995143214	2.15515857698832	2.54353079890806	1.25221143263185	1.47342448991032	2.28229605581324	1.9250960125814
ERN1	293.09848773523	0.572665735099854	0.00130478837075005	0.00663848290622153	1.20627138564252	1.22053161965504	1.50962252699385	1.50256991368073	1.88889692405662	2.05896043438229	1.37106648706629	1.11085718976214	1.81611059976436	1.80747898740093
ERP29	1923.60136615588	0.325793698271924	0.00606257111113462	0.0239271540954147	27.3097039155719	23.7906079431286	27.0213841521007	25.857051183715	31.1651705471408	32.5149731945941	31.2200368262762	31.4671563326811	35.7279971395729	33.2207212052786
ERP44	1106.82972041581	0.747805424100216	2.87630922574117e-06	3.20137032522639e-05	3.59911875736437	3.84469776483632	3.8439897494108	4.7439541353914	6.16640889087502	6.96727430683225	4.72408451976547	5.32577355436934	5.44982531129947	5.04763464428576
ERVK13-1	687.333606697802	0.467569528138813	0.00393111055496512	0.0167097830629047	1.46491059812431	1.52764678469226	1.56981114896346	1.75418096047772	1.8819269453036	2.37877667754089	1.30860559446803	1.40098134514373	1.6917649753863	1.57586640211495
ESF1	798.5631939353	0.694352201661942	1.72304437017247e-07	2.5532648240596e-06	4.40894535725405	4.54032928609128	4.27057179340675	4.29346437926584	6.40540180490061	7.42973056054825	4.03769713680214	4.06840065704682	5.34362575988743	4.91792530838327
ESR2	70.5971001484596	1.18124345715473	0.0026839189900373	0.012122011967564	0.31932029381943	0.19795483644014	0.159519340096734	0.143958556811656	0.467004969482559	0.447858498054707	0.234236205239754	0.207312570440133	0.299639010501376	0.263250267090035
ESRRG	69.9874648024368	2.38478335252362	1.25105032859831e-05	0.000118954429247564	0.05076162606265	0.0305912644801153	0.134761938513721	0.12473455260973	0.407676658159495	0.461261078292789	0.0374777928383607	0.085136362260748	0.175331626716234	0.260832264636764
ETF1	5009.86054780674	0.540069096033177	1.09254991487103e-05	0.000105535290296671	21.9827307809672	23.839141229366	20.0500621746416	22.1763215486291	30.7009855501573	31.8461827210226	18.9235460356311	21.9236543827934	21.9100284880578	21.0489908682066
EXD2	1082.86120615428	0.97365892640594	7.34674036934678e-06	7.39669820385834e-05	3.73323009283428	3.83264815133024	2.7436084870937	2.77742520902238	5.85053024763266	6.71926692282292	3.950992359348	4.21557074913367	4.87133131569949	4.62503174957178
EXD3	210.540507224027	0.658736781257731	0.00705451692436391	0.0271917597222419	0.81064569857672	0.638348435240887	0.878774893362323	0.747541278550572	1.42109951990804	0.957292678706714	0.908667316257479	0.765000702869884	1.06982788412756	1.47323674128964
EXOC3-AS1	128.481770799855	0.785487719548002	0.00505238225680093	0.0205774209391067	1.72215543587211	1.30541968237473	2.2033894781754	1.50426732471169	3.18412094694566	2.50239918639138	1.2655237091142	1.17791090966151	1.32661739377127	1.87206076729117
EXOC6	702.539498662998	0.562385267148594	0.00157979095775662	0.00781643832763661	3.46476719704847	3.39492681964307	2.61447419552453	3.47331993409894	4.86258662851768	4.48305317533203	3.78659634252398	4.30831005922842	5.00228532368867	4.69372573272568
EXOC8	785.340301665601	0.365491571462741	0.00523693086236572	0.0211694894866931	3.19651763089685	2.76906536382737	2.97175037617316	3.08234323619953	3.95155591929558	3.62189439086163	2.82024885722741	2.98293034550441	3.13554567815209	3.20448808203388
EXOSC3	791.257466722364	0.356453424752235	0.00955533539450631	0.0347339497247383	8.8021415876658	9.10938952482522	8.06405356710847	7.93247557971814	10.3651867127787	10.8412084082792	7.2765479278282	7.55191309919435	8.39556560191177	8.53783104150562
EXPH5	1588.07079136039	0.415952767530409	0.0108204313058824	0.0383669106818963	2.89852194459202	3.02209639775323	2.59550297059368	3.0818181983094	3.31074815860034	4.24371656488141	4.39611032648764	4.9260097296682	3.64223337593564	3.6536039513942
EXTL2	865.061663511522	0.617400130671396	0.000110876396843956	0.000798337243969622	4.77924307969959	5.09236998304609	3.98515454140477	4.93332492172789	7.4063775077107	6.67876044194961	5.26239560027961	6.11813906476842	6.4051964180079	5.94493841599293
EXTL3-AS1	16.3620758391279	1.39125555082641	0.0103756344965396	0.0370432227344543	0.365682043674768	0.353520844864581	0.185819580015247	0.270274855247446	0.59062956704507	0.91090080273862	0.307109691314345	0.229992920026746	0.569862909349138	0.486750493850237
EYA3	1319.71257935006	0.419529279771215	0.000593473284419874	0.00338614177402648	3.7910437598086	4.03211418815591	4.14244236926795	4.36580669182367	5.01713273141459	5.64258712117728	4.38266532224775	5.09328175741678	4.86022376970655	4.70874652778698
EZH1	1186.55078148047	0.369091498881143	0.0113141048084048	0.0397652528664043	4.77135520037895	4.48537411148489	5.29894058721844	5.36242416227586	5.76051277229801	6.79568485030382	3.63894528671891	4.1204489741452	5.8341923633825	5.0093051463504
F11R	442.226695317361	0.709014363139306	5.51107133450888e-05	0.000436010623451782	1.39146560252332	1.57776892027648	1.79191410435288	1.76968222555019	2.37448918454406	2.83059895599748	1.51456580685459	1.67509129207057	2.09571831089268	1.88653607554377
F13A1	33.7061710884534	2.40185424918293	1.79669842219428e-08	3.21036360557843e-07	0.0507628775357479	0.0584029447426484	0.101839657402683	0.0992231130270906	0.439369107193221	0.362276694191577	0.0954003700691725	0.0835904891839377	0.183056708460587	0.209669381767226
F2R	328.246053135552	0.990785433853766	0.000283942057264789	0.00180801413333875	1.59185790701649	1.61522876676746	0.903441141365713	1.28835876065788	2.62028882664071	2.62712177460661	2.53353809273021	2.61218747220636	4.61796337152792	4.16071655017188
F8	94.3594319421805	1.08621836778431	0.000837823653853369	0.00457157477771524	0.187876897438837	0.209715755428141	0.110231954246333	0.135345651703267	0.334567149931864	0.332172352308382	0.168169583249054	0.216349272228549	0.36000584411887	0.288750292962005
FAF1	2064.33432784188	0.485081699962099	1.45695084951469e-05	0.000135964073186437	14.6384305897857	14.4894648463238	15.59133260556	16.174827151753	19.7880220738469	21.8221222119496	12.6981475154363	13.362561941252	14.3377291382965	13.3561471165812
FAM104A	1861.65274005876	0.352167591828518	0.0149204273732227	0.0495071581711509	12.8210340767184	13.3948366398552	10.8547593624491	12.4410816747879	14.7767290936422	16.1006665916573	9.72203810686016	9.89991746870682	10.6327313636962	10.6527885859479
FAM107B	1021.69616773034	1.50903029873624	3.01422537611333e-29	5.31076369017407e-27	2.59919852065923	2.70377337576777	2.34094631591957	2.87178864614022	7.20121662942106	7.41454624557238	2.38495045335023	2.71233946325841	3.59955954173731	3.50025355130825
FAM110C	146.140763781261	1.13446457552057	3.52150325942105e-07	4.82173601043131e-06	0.521809729240679	0.613570690763521	0.491124747006881	0.65285578550584	1.10129741175781	1.3364809795876	0.483564086248173	0.493414031306433	1.02983965312149	1.09214872352165
FAM111A	2485.66300241453	0.654260157705319	0.00250698969745747	0.0114586821409473	11.4608019314794	12.5744275328375	8.24974225639514	9.21970080378218	15.4761479715957	16.4758121774619	10.5148913702086	12.7091794048575	17.4011966080088	16.1144526375867
FAM120AOS	840.926641529207	0.456273779195211	0.000241040018660532	0.00157233768559049	4.203538989641	4.63377282385849	4.03176728501625	4.35543679049547	5.80140504666162	5.73722385371442	3.71087463764732	3.77068147146543	4.92036873183025	4.9285272730208
FAM120B	1321.0503186622	0.550071217968212	6.27205524379706e-05	0.000487031032791805	2.05082454491128	2.07432210848857	2.13851380971766	2.40654925117341	2.8532020216595	3.3421592521427	2.15860707917506	2.53286867753569	2.52996111027853	2.64304322213519
FAM126A	3354.57816760931	0.551358985920102	5.38858491210404e-05	0.000428243020145968	10.6451909669727	10.934322769127	9.08542388554004	10.057623173412	15.1686008069869	14.0012242628422	11.0781171043451	12.4914086758275	13.7957678058836	13.2254326997565
FAM135B	27.4700617751687	2.07090260507608	6.51274346495591e-06	6.6405108280705e-05	0.0307273765512409	0.0252046670622419	0.0535336090494124	0.0550558583199728	0.153240952698006	0.185553426689333	0.050287998865032	0.0360747297715034	0.269892764906809	0.239949395991671
FAM13B	2095.25225397952	0.454366332163161	3.41468682802878e-06	3.73453551974172e-05	6.83835764455444	7.01917293533493	7.17394312804134	7.43289513044273	9.24956795430853	9.79276550397869	8.17909600378631	8.695415549521	9.75031802246657	9.31545968997738
FAM149B1	458.588556335473	0.627550226979823	0.000462244864730874	0.00274310955597618	2.2824479090955	2.49717963561606	2.88239020122172	3.04729956961332	3.72374136190041	4.34457273615494	2.94166370990752	3.21901968144714	3.96730578217203	3.69321160148692
FAM153C	21.742105060013	1.1895830573453	0.0115360773680198	0.0404079966759744	0.347601664078035	0.349134285888039	0.346054768989795	0.177947486361955	0.697914427559488	0.659705316746633	0.444838550093201	0.349794246057391	0.375194622513993	0.329019832426158
FAM155A	379.596559624491	1.10976281912371	4.10166911542188e-17	2.21678859339319e-15	1.54756280792007	1.48757080990627	1.5184471955194	1.56935019249901	3.27355114436213	3.18576016336252	1.69511179709654	1.72467870425861	2.3979107368358	2.45960990673221
FAM155A-IT1	116.726258399668	1.22018144081728	1.28055553638136e-07	1.9436576632024e-06	0.868166002968873	0.915593555044957	0.916684464617866	1.16665405142782	2.01274748330391	2.38299752187997	1.07072000845621	1.19133023323207	1.94550973629987	1.97501639231319
FAM161B	396.124261209814	0.818311658828216	8.04979009526571e-05	0.000603528730589304	1.5566401233458	1.62425114636689	2.17650742776479	2.23306775690086	3.2972005365952	3.23314978017247	1.98306090998862	1.92564706233739	3.16323184866494	3.01958565539796
FAM169A	440.953774369221	0.696596873002438	0.000115789272687275	0.000827504696929088	1.38300560457876	1.33953379257761	1.08643633869713	1.26162276050276	2.19326519953812	1.82625328111505	1.38503356681602	1.48990102128384	2.40967885771487	2.10212284741502
FAM172A	802.552836018585	1.25155050976459	2.62202975579998e-09	5.50626248717995e-08	2.82512621241534	2.95821776309449	2.07494781630827	2.17635807938853	5.7997347160039	5.88436304388546	3.48231158456435	4.04017647692746	6.58349711644453	5.78078086509933
FAM183BP	16.8687294063122	2.63787825163172	0.00124235632620125	0.00635940619155721	0.151534908808761	0.121762437045592	0.0125717124132095	0.0349088238272906	0.456377558276605	0.522899395511489	0.078315768276882	0.119814162345445	0.245345846051955	0.153679573043183
FAM19A5	179.275748992456	1.19420848861898	6.55550816179509e-09	1.27485097464313e-07	1.09333989409517	0.859915568589521	0.925510649496788	0.863285778431646	2.24321613657231	1.95459467909515	2.13252883365886	1.42968571908518	1.77819630190026	2.25396174629749
FAM208B	5443.34407492025	0.54517704778112	2.2354731310557e-05	0.000198522182943903	9.09787081487389	10.1888190846924	8.83823532947391	10.1897104089965	12.8734705804553	14.4251134336388	9.93919687328166	11.0021641361497	11.1620964612539	10.6612819713568
FAM209B	7.4630703231147	2.22294303142454	0.00363767659967883	0.0156704704180297	0.103046240630896	0.144900819229833	0.11968560892807	0.0553900123733599	0.420466439575742	0.528925584354269	0.186396055422001	0.207392459677297	0.0583937295444466	0.256036386938564
FAM210A	2790.4855956595	0.889736549230897	0.00487373601773829	0.0199235162172926	7.35201079596123	7.52492694170112	13.1913252035459	14.8633235757346	19.0700967968893	19.6445096808262	10.0707320308737	11.2285229605758	13.8765825277787	12.9153203573529
FAM212B	1725.12200003767	0.535244614304196	0.00453802445739523	0.0188352898183784	4.53228804130803	4.51691405147334	6.26585772974142	6.02669220361031	7.49710735086214	7.58895500263575	8.8236551100024	9.19850571444143	10.1602975433255	10.4667776097373
FAM212B-AS1	26.1337241793419	1.01314949192876	0.0112535688950103	0.0395603811574595	0.16731111805861	0.1646878386554	0.242909553549461	0.215841700022703	0.375479884801801	0.404136698454914	0.29399519956887	0.277804681440096	0.246508677138358	0.308815892860404
FAM221A	100.606722114635	0.783498248638499	0.00162963317470168	0.00801435933031245	1.25795360286305	1.3814267618242	1.07145967508791	0.991734347883774	2.06945970965919	1.88101460976083	1.31264626126292	1.97719719958477	2.24038845409439	2.38141370647159
FAM35A	1122.2972789872	0.729083831647914	1.03406796099263e-05	0.000100825918122463	5.30426300440952	6.24641302043885	4.77473637453697	5.37770431059412	8.19492154240878	9.37101079181027	7.0182116342983	9.42556230778463	9.1526267869682	8.8588589880743
FAM43A	144.872641595691	1.81642351181126	1.65581627523554e-11	4.87856638016305e-10	0.41945881480341	0.446359025977306	0.724202587567938	0.572815504747586	1.82719072485904	1.88947077914506	0.767530102935055	0.627452862902855	0.950787313994284	1.15891500729748
FAM66C	133.061071557662	1.89193109422823	0.000283117138071564	0.00180433633136925	0.753253505456828	0.60635624507475	0.190192379160037	0.287532844390063	1.57389540088589	1.77332300126758	0.479565041550263	0.790961566975019	1.37952951138714	1.17022807033437
FAM71F1	9.37766220342064	1.778084775804	0.00669109425136065	0.0260243685683716	0.0587864785792083	0.0516649664607609	0.0341395059267206	0.0394990607608873	0.139924390856341	0.168622122668395	0.0303818326114768	0.0739466107258293	0.0749538638917588	0.0730326379890709
FAM71F2	112.097409266367	1.08302989477086	1.3861703417141e-06	1.67509843968866e-05	0.278069414852963	0.270701753305786	0.301675844924111	0.358069750882567	0.590171326397993	0.660599672132879	0.281104859722077	0.273673440319793	0.360171402798657	0.312374674147289
FAM86EP	108.917365679592	0.613330480973123	0.00368604963017963	0.0158594648190806	0.715748879291971	0.597056454873522	0.704512090661996	0.697736998328184	1.03125629531875	1.00362790663335	0.71474320809463	0.872861867974932	0.893688314021507	0.912884900341104
FAM8A1	203.747641484575	1.0385604409697	0.00294569902842606	0.0130816413924416	0.879139707738654	0.88226123674797	0.432003250602961	0.541222873272594	1.51255675713345	1.23873434195588	0.908708127724636	0.982983439018421	1.24759526106573	1.21620945312717
FAM95A	1777.57420058863	0.578041463690202	0.0102351710545756	0.0366308102398064	16.2881385268793	15.8059118810938	11.9156556611707	10.8212404323274	20.0709310095229	19.9950634165485	12.0256880794066	11.5506702855134	16.3875013225714	14.7981893259623
FAM9B	15.4124162274214	2.8416604851573	1.75314931656982e-06	2.07029073784475e-05	0.0508616251901424	0.0834402720339174	0.0393829963757605	0.0364525806584547	0.311301115748659	0.409517500907001	0.0525722724075911	0.0341216315018282	0.105680710720953	0.13239243104248
FAR2P1	1928.63861168505	1.15664889845375	5.19421995831917e-20	3.84525048090863e-18	6.67674936364614	7.03872628631145	6.11142821357116	6.26684779833495	13.825502980779	14.5947718511671	5.96022301648755	6.35000129717002	10.4572415252682	9.61404866650558
FAS	1230.32489694055	0.847679106655791	0.00240173549887886	0.0110630530077769	3.49786077849686	3.89853010951735	5.43788597215539	6.83501871580996	8.64745544286484	8.58999830050902	7.64470428987344	8.49145048420543	11.4156736904739	10.1693971278309
FAT3	169.160770420776	1.03099412436182	3.22203155110899e-07	4.44897914568882e-06	0.117929435253439	0.139507073189305	0.153278262119095	0.158978379609747	0.27114974942557	0.296160038004337	0.141244337476435	0.139394039417691	0.382933122406607	0.297667336187723
FAXC	209.266207165655	0.690201671526344	4.05868912610761e-05	0.000333847076157283	0.345215464129958	0.390400813777428	0.383987241020968	0.418251345480726	0.603688137067098	0.606645001823876	0.311514953279919	0.452162310396844	0.716256529317927	0.632775642005308
FBN3	6.29826388707303	3.18542167724998	0.000875214196887875	0.0047418200907034	0.00375898779739482	0.00792867951294502	0.00218298474903069	0.00202055290260227	0.0434578035070201	0.0249693419833465	0.00971353794352171	0.00378269852653372	0.0596434846417078	0.0720503630327604
FBXL13	460.7981794798	1.12364586782995	1.98203715028708e-07	2.88607541743041e-06	2.22118875473075	2.51339837893648	1.66931774985427	1.96088113577623	4.13000520288054	4.7719053806216	2.29049268456081	2.65068357434519	3.9093497738991	3.35402627014247
FBXL17	568.318897067893	0.45138727480905	0.00757017022385227	0.028748426972667	1.74498900216053	2.03435177090254	2.30150822676027	2.33296340961318	2.90962776186413	2.70371920085599	1.83911457452475	2.29417937726679	2.84413397484252	2.57491011246775
FBXL19-AS1	305.080991854834	0.523118998876195	0.00183441692480969	0.00885738333741354	1.34909463151464	1.47196640865821	1.59838298028084	1.4018397613925	1.87175497209264	2.20698682792335	1.49707229934555	1.60733093084751	1.65172524080695	1.56952702901848
FBXL3	795.178285900184	0.790821879370872	0.00317805490895373	0.0139740827154619	4.61121038589886	4.76776364202981	2.77124962346129	3.36966053295517	7.07115791661825	6.07267201825746	4.83898955714234	5.49455613338622	6.14267811376344	5.57712653759538
FBXO22	1804.84077918494	0.401903175775292	5.76577842688309e-05	0.00045270610562947	8.001420763779	7.88179581734444	8.1233406165735	8.72227812983122	10.7024680077871	10.4197037701851	9.25614325449746	9.6706139331432	11.5774938978467	10.7483564865274
FBXO36	109.795950198473	0.963458587915743	5.58210994920609e-05	0.000440641555533432	0.544625921174587	0.623356632637045	0.595791985047617	0.796553634422152	1.18865787784858	1.24669711028783	0.576035229179303	0.726499838322496	1.1196660553787	0.980071687084597
FBXO39	18.2603685538321	1.38656352819475	0.00355494564149275	0.0153478527952612	0.171104975444702	0.120301579972459	0.149050584363931	0.172450008528937	0.334540284557464	0.452047625288839	0.121591119536573	0.161422745309714	0.181801713458715	0.121468629539111
FBXO4	167.658774940949	1.0415766586247	3.55074099731913e-06	3.87131841780729e-05	1.216540657107	1.39265787370895	0.987275383883032	1.08148635707461	2.53499939882447	2.1662239721534	1.32194197836096	1.56950549099617	2.3421351976948	2.07049947602787
FBXO43	24.6769170140049	2.21679917845768	2.86585435351129e-07	4.01698391841809e-06	0.0798462210920197	0.0823368942951248	0.0618262476696209	0.0629484583735467	0.362002060548439	0.289300453107898	0.0605232595603068	0.117846476788861	0.301645721444887	0.28719587215529
FBXO5	1057.61416284151	0.36884117578682	0.0103595826899786	0.037008411884577	8.85925945058926	8.51187972628767	7.31626231647397	9.05767143512278	10.5742050169166	10.7171519118449	8.80588761951232	10.1960106753277	10.5652142046434	9.51858856209201
FBXO8	244.798485591375	0.79005998451165	4.36156071027812e-06	4.64890127975742e-05	1.75974674450787	1.63337088114285	1.45415913461572	1.77965537999276	2.86648852856299	2.73855042174034	1.4163232740287	1.91783405650082	1.91557861593366	1.73809618404891
FBXW11	1818.7830770458	0.457688741495819	0.000328703586481347	0.00205006318237694	7.40677625816349	7.95058110825047	6.781332926559	7.96266658685614	9.80749906794796	10.3798912281964	8.52596892057676	9.57698849912147	10.7599071029053	9.94322742331755
FCF1	1171.07500102865	0.358798484704148	0.00297692909229302	0.0131984181371693	9.41271368405745	9.38009337340658	8.59652572340944	10.1035968430423	11.7593519190599	11.7263691001903	8.05415107659616	8.72218279991041	9.48713254817044	8.54658009981195
FEM1C	2384.10450985743	0.49012673550351	5.12487142185906e-05	0.000409873398010599	7.45219492496511	8.29701143682926	7.28774793823528	8.15985499671887	10.252687996247	11.1411303787095	8.18149093358669	8.95275037980596	8.3173444694223	7.95514259723858
FGF21	28.0096609309415	3.47839236413916	0.00140911901561229	0.0070752150419007	0.122288869407244	0.286598800229739	0	0.0146074270435843	1.03492857383379	1.24718679754124	0.140446505174243	0.0820401574485649	0.615982634828614	0.578758209151196
FICD	82.6722330936278	1.01444954206596	0.000542819144136791	0.00313468715193252	0.604671095840167	0.895822327001156	0.865346525605311	0.870606190847178	1.32175700872084	1.8517954758609	0.781260268637339	0.825801350647214	1.33389528530543	1.4104266278495
FIP1L1	1363.53018501339	0.432645335145972	0.00016159039392481	0.00111300279537187	10.6459828771232	10.349941896039	10.1320008768532	11.2907357857751	13.3870197494218	14.57307989953	10.3811726641469	11.0091178419241	12.3664525039991	11.5198269796057
FIS1	583.983294766221	0.435096010597122	0.00525965360223765	0.0212496759499714	15.2217006305689	14.0434187752086	17.2873634405833	14.4709592813259	21.4252021706955	18.908279179987	13.8386369699157	13.4727922976425	15.5017573064799	15.2756663780442
FITM2	638.52409947959	0.61245405284554	0.00792179009894892	0.0298235084943122	2.04934311976068	1.99792841112862	2.97311328024395	3.0098790698011	3.53859644115599	3.93803579365787	2.05527254956523	2.21176524759054	2.72843453567163	2.42293579161007
FLJ42627	218.275536014808	1.14699199887557	2.15785278631303e-06	2.49620963299662e-05	0.481338965924031	0.57163656987438	0.434504973654646	0.388768455619959	0.875167835479559	1.15061641817164	0.572286106366406	0.517001432427218	0.904498284157964	0.842756590919212
FLJ43315	21.8995730338098	3.48839696427786	5.46978731293352e-10	1.26795459711603e-08	0.0424284005453667	0.0397744414545992	0.0657060225134663	0.0228063597158063	0.384718730908916	0.546586468485472	0.131566230313166	0.106740069984646	0.312560486502484	0.441763240749441
FLJ45513	165.281121951761	0.767376991161189	0.000130295218487804	0.000920108799413473	1.34126949590709	1.58762997602821	1.32121513627167	1.259410624192	2.14758239566162	2.41960490285895	1.5443230191807	1.62309289276018	2.32829702962648	2.22978083373299
FMNL1	522.567875420605	0.868819512949189	2.62153151537353e-05	0.000228997341444552	1.85425999677044	1.91125680421153	2.75482369391089	2.41920528669308	3.99727957691088	3.96798265726722	2.21435313909055	1.90218835144564	2.75952755832032	2.93942737008272
FNDC3A	2590.64946200141	0.545998117308888	6.76872217030332e-05	0.000520777798771066	6.94824541449431	6.78055369590853	6.84932564913214	8.38233866903491	10.0006238568326	10.638239504361	12.2156214879266	14.0269931897011	12.4591246267869	11.2443069748189
FNIP1	4343.28099964005	0.569610309919046	0.000681526985537407	0.00381806803121894	12.9491760436669	13.4010943794455	10.1232905210848	11.5029586713719	16.8548590282067	17.9553332138209	13.2393932393123	14.5202493417272	17.2101203940064	16.5099741975972
FNTA	1055.84286953465	0.436312688725381	0.00174288132441044	0.00846878821146924	11.2813126342641	12.1935664597705	11.5262045778727	13.1575148754518	14.6139804450181	17.183634763265	10.70351604203	11.6172220749755	13.6682692231675	12.0429083224623
FOXG1-AS1	62.7401699544507	2.30901768341219	4.00551846684247e-14	1.59667940876238e-12	0.512156895422948	0.553985452525109	0.755011205934088	0.76236242444483	2.89355247036212	3.35445740114493	1.77139512559213	1.96243682701274	1.69670885315002	1.67807905062181
FOXJ2	3017.594940043	0.482242108412327	0.00141072189710622	0.0070773089707046	10.7898549378882	11.8297166266201	9.20081481199171	10.1068686459137	14.2155290444961	14.4098821227236	10.8401541899536	11.3585959836193	13.7360756629341	13.1910982065608
FOXN2	1936.80134496399	0.719563631384663	7.45468917086366e-08	1.18434777728987e-06	5.92928030865025	6.47459723164196	5.74966335213098	7.03030355839096	10.5145343948016	9.73458631652175	6.97869249126171	7.78919459851152	10.1187579051121	9.15515041993401
FOXO1	318.306978891118	0.748301775094783	0.000189000860888617	0.00127148001832629	0.888553833031622	1.14024166794783	1.05368390042007	0.821641040984821	1.66491422414092	1.53466826203658	0.857423711198292	1.07236503701561	1.71126803507772	1.77327157954781
FOXO4	201.585167256811	0.522839860394006	0.00933096181407849	0.034131663072903	1.19805105034576	1.26537193901513	1.00188437151078	1.07044342311264	1.45568294537707	1.72345953988343	0.864089991690898	1.00199424477602	1.53885267553958	1.36080783226948
FOXRED1	417.615497019189	0.604593539520561	3.31168053960615e-05	0.000280656562901976	3.78468420372735	3.44896956787329	3.40534183798849	3.34404266956397	5.03716879047094	5.35562136909399	3.43347235756447	3.31818487080045	5.09017741392953	4.46258174862969
FRA10AC1	558.745332537707	0.479916807922087	0.00243483020582553	0.011186251211588	3.76854346320221	3.53011044064134	2.97613823016604	3.51160843740671	4.77245516136127	4.62809130889065	3.97284016345782	4.28595417559715	4.43459638276874	4.34277876675705
FRG1	298.835855845995	0.623521884581763	0.000272730628500306	0.00175118110187569	2.64072046280239	2.67983159399221	2.27305118355865	2.88484779687983	3.7428097607872	4.13887029083625	2.72070330560359	2.72617686509172	3.27374395146881	3.37318558921334
FRG1DP	167.488377688533	1.09075861183469	3.99421656629542e-10	9.52288250088754e-09	4.9351580894243	4.86250037261093	4.95218929144749	5.01681215646775	10.7307364098881	9.85288695720356	4.3377075044399	4.72979790337489	8.56111458575361	9.62867643578698
FRG1HP	76.8732222086499	0.956020390537348	0.000350149317882694	0.00216205399338048	1.14968218276537	1.051797554969	0.884855142929746	0.833905889468704	1.8274662839991	1.89039101394792	1.2026673226296	1.25450683650952	1.64836378737354	1.47500149651587
FRG1JP	226.748710982326	0.739340578492411	2.41159160289208e-06	2.74304922216627e-05	2.72862239221606	2.72847256889918	2.63397900301495	2.78999869127419	4.60196227641776	4.27678348447223	2.34406172554214	2.59938936960841	3.83468046792082	3.42645857847772
FRG2	5.46359348182068	5.78881804216535	4.97045852763324e-05	0.000399332300204457	0	0	0.00496299385056473	0	0.052306347588641	0.108374409111672	0	0.00429996350960839	0.00484281649625564	0
FRMD6-AS1	34.2330062758022	1.80923909882154	1.58033187160028e-05	0.000146238798559482	0.215939430231904	0.089969822258452	0.204362237586466	0.206352024561858	0.663553512313864	0.579552694756004	0.198401954011959	0.112674862570304	0.534791204540302	0.681319668377182
FRS2	948.585283743362	0.69817239843915	0.000307059336779343	0.00193493506964065	2.46325019177881	2.70486224436793	1.85462000725436	2.38730107210398	3.57255364456076	3.88689034762411	2.59215762228661	2.98700150906004	3.68395424865755	3.58171575727487
FSIP2	180.509132290746	0.479513475282743	0.00810107449825332	0.0303816159184175	0.158656609005235	0.161595746927695	0.169334380072859	0.173329942986593	0.20529436911214	0.245475570241688	0.131194210750535	0.179506669289168	0.204112589055635	0.206998333845004
FST	588.389495528138	1.12552316240345	3.26798625563692e-15	1.44669974467505e-13	4.21458141852044	3.93103905057408	4.54970751612981	4.66791540881043	9.85824785855619	8.66141226072288	4.40902950542806	5.23305149208615	10.6317780678293	9.37400712751428
FTH1	16861.2837252939	0.583636379911107	0.00209306062266103	0.00990535458250462	285.217488777768	282.048914074576	222.117792337369	224.459078912402	336.457769533706	406.624662949566	255.843113389161	283.571726341781	362.739092164184	324.615448959728
FTH1P3	72.9975483125981	0.838814543762652	0.00453804445649676	0.0188352898183784	1.55098634090045	1.47148756467361	1.21542366802425	0.984362966224261	2.26202717335699	2.30199059354185	1.37137031970556	1.05304934452498	1.24952787727498	1.72454577485723
FTX	388.010308692042	0.464213431696964	0.00131395345927651	0.00667740005739625	3.10232166721113	3.41544023526755	3.0408069521292	3.05858193961148	4.40478452913784	4.0940625676414	2.87035458520453	3.25133454771256	3.57604587696598	3.53451929065783
FUBP3	1621.66141750115	0.439779350332903	0.000335989557629561	0.00209180212575097	9.65040936528625	9.66346638627442	9.73957281015703	10.5871595902383	12.158010629899	14.0898861174037	9.95163808091779	10.2624778772023	12.0764595524321	10.9277567317483
FUT1	211.7426955174	4.83314358516651	3.31497324485103e-05	0.000280800546158799	0.217657661590875	0.158917991693485	0.0145848394068251	0.0269992171136641	2.94333089317476	2.93205492226054	0.103836101313138	0.130575928768413	0.773254181462245	1.05190221775008
FZD1	443.790629463257	0.603454490611929	0.000235088764905137	0.00154150686597083	1.92203743128022	1.7576302819913	1.97536282597489	1.84600267903804	3.11586574498477	2.45990808212925	1.6859263054222	1.56300016134038	2.65674018427598	2.9616809359145
G3BP2	4520.80971322658	0.363573571861149	0.00204735671753588	0.00973075281394849	17.8269996291449	18.6012088576736	20.5145236307632	21.3757981039953	25.0300872065438	24.1560390260618	20.4712801487848	22.7406447241211	22.8723786280145	21.2009733889188
GABPB1-AS1	376.249426194386	0.928783059865683	0.000156938023842307	0.00108520056596453	1.86335926440615	1.69828107512536	1.25746629481819	1.20563404623941	2.86879582133955	2.74534518160363	1.18593531898789	1.36726979072276	2.24382815482017	2.13732106518125
GABPB2	357.173136304156	0.981441537024354	0.00177811735727712	0.00861624029644268	2.04125949952041	2.10493327476621	1.08299064567228	1.33293081514586	3.1465440172831	3.19577350023959	1.83901138310371	1.66866788626699	2.35915950365913	2.40444009854434
GABRR1	4.31972807938244	3.95544426739267	0.00275163209261182	0.012358145765926	0.0050818128931428	0.0142918139833302	0	0	0.069118865494682	0.0675126022554279	0	0	0.0172784182631515	0.0216456890081633
GABRR2	48.9646702831449	1.46206146432805	0.0059753854500746	0.0236319452850425	0.203263931582311	0.206428595300609	0.0786953095865729	0.0728397375551701	0.337900183493512	0.418242229758672	0.171192902252929	0.178030837165974	0.217570893484228	0.203086776994947
GAN	1080.24844804674	0.588391419233944	0.0011156071066361	0.00581534958929627	3.65249486239743	3.97753386553583	4.71617665198405	5.25095854535041	6.36054190900464	6.54345475014662	4.42010867340628	4.59540431229496	5.40231953415271	5.27498708608298
GANC	493.286665412351	0.692356143013034	0.00025096020243366	0.00162920700319774	1.49305738237586	1.36133440570011	1.09380036889709	1.27331458748904	1.92310407462659	2.20146409938417	1.28151720850318	1.45734785755924	1.88648555734253	1.7041309092182
GARS	8961.81713757192	0.421738776511749	0.00576935009737915	0.0229925761967254	70.3126173818	75.2229651506028	59.1864131291459	64.4726857632958	84.3705555608399	91.8902370648749	57.3160281595271	63.2784630832485	77.8869557422595	69.9561810967636
GAS2	12.0575159522332	1.88703552042361	0.0110223711566273	0.0389028760834568	0.049168241687949	0.00987700619651741	0.0571076723451113	0.0981655932448278	0.17196381571301	0.220563415234367	0.0217808291712301	0.0353417016589562	0.103488965914468	0.189483643784095
GAS5	1800.75166183553	0.525635953702255	0.000218968936514581	0.00144765992212023	45.8086193002079	53.2691636693675	56.0230912803653	59.6175323683621	73.7765583605582	77.0256251291607	38.5150540088211	41.6978619659883	72.3452111484851	60.7144223594966
GCA	329.534289218342	0.49650044509196	0.00339098751059178	0.0147193419436109	1.50868210988543	1.3029486814887	1.28777674288665	1.45163171920996	2.07892106485924	1.7551422518743	1.35886829208835	1.77720872987349	1.99708630341147	1.77098469330672
GDAP1	637.662998167511	1.0586309675826	3.17662977289225e-12	1.01947249487411e-10	2.48908737429306	2.61700790461945	2.31068009502117	2.9863605642573	5.23718033763151	5.34245801461277	2.23639662073084	2.41253051673208	3.56392442009557	3.6251584736123
GDF15	184.16822565723	0.927941603262117	0.0101693845680578	0.0364620241564123	1.54186344183455	1.46930880742989	3.3596665819973	2.38363138307774	4.07292425564732	4.04752725266533	1.26444018725563	0.910436591213809	1.90633196265473	4.07075109224286
GFI1	78.4736369157346	0.656680670493804	0.0128219794944604	0.0439771183011285	0.508467687016848	0.551320230416741	0.498073101071795	0.395153490333661	0.708242725539666	0.791666989446685	0.430586783698463	0.517839729214859	0.541556691733857	0.608856287840158
GFM1	1337.89379199079	0.709710574085112	2.20677890330909e-12	7.26752102755193e-11	5.98611882283919	6.2075892276006	6.29341577577954	6.59677555783862	9.92846666109779	10.1022821563055	6.1583574942508	6.6423165792777	7.55531879742102	7.01381843191146
GGCX	1709.64125786492	0.385590245388978	6.25604759774176e-05	0.000486002216157901	4.20441626893558	4.21927596659185	4.35166056413381	4.41416228533078	5.64380871769983	5.32662052764508	4.66992833987302	5.08771859114756	5.36687029707295	4.81913610010975
GGNBP2	2487.24419952675	0.440735811019902	1.61900386550697e-05	0.000149268598149489	8.15843708862801	7.93447855006975	8.63522202946072	8.99640881810871	11.1263006535256	11.2268269252057	7.70742775389954	8.3423161297856	10.0630560662602	8.84328981586328
GIGYF2	2723.16728442388	0.431384937459813	0.00013039330113038	0.000920432521080193	5.59569168615384	5.95076597409927	5.57014230348241	5.93175685971153	7.13581140021584	8.04002029834225	4.80176102672291	5.54067216642303	6.59174903021893	6.04727690269273
GJD4	8.1257266276332	1.75437239232686	0.0111924834011673	0.039392801647057	0.0564145557884333	0.0793286130593708	0.0524192666950786	0.0606485578518435	0.230192069767732	0.177148717678742	0.0583119667052553	0.079478566034559	0.0511499504364013	0.272333820609879
GLS2	5.97067244428287	2.74643974478457	0.00759955984417187	0.028813566794591	0.0196549058755732	0	0.0228286773368865	0.0211300377962321	0.160398443322168	0.0553887093977578	0.081263865397401	0.0395577679428582	0.103954144032819	0.167437876605594
GLTSCR1L	772.092064905598	0.680514253323204	0.000552905625410754	0.00317764440127336	2.11088932514508	2.24606706338886	1.58379128391807	2.04845702342804	2.87106744004168	3.38370029209341	1.88990579270366	2.13195684294455	2.77655370540898	2.41734514923376
GLUD1P3	64.9652734573372	0.997302345426975	0.00146279727617751	0.00730114028582764	1.03460265704859	1.48280760214101	1.22477382618468	0.962525103407605	2.62494320034246	1.94638503507258	0.987138293510393	1.0010852545807	1.08236948691314	1.38419671688661
GLYCTK	452.983802337708	0.739260512702886	0.000697439638605795	0.00389236268374897	1.88121759244398	1.81412012496298	2.51736631031182	2.20396859233599	3.97521512202052	2.88960398189332	2.01722576189633	1.86947929310161	2.66908517685106	3.23714696857452
GMCL1	1106.93343363526	0.480832512775756	0.000252452254787778	0.00163648133815521	4.82164235118615	4.85815484482191	4.81138413590962	5.48735981548293	7.30390467907604	6.31748093625889	5.14078077699402	6.38450767491188	7.66383846830875	6.74401678086111
GMDS-AS1	60.1338072339293	1.22146793407477	0.000821568570948772	0.00449680542141858	0.774598850384761	0.631431781530508	0.39116392338582	0.458606979020741	1.35892564444746	1.22023579024981	0.522163832839251	0.564844073113545	0.966953093262448	1.14760317945547
GNAI3	5117.17009654589	0.324804958642927	0.0103878983778618	0.0370794938248677	21.8166007718466	22.7952077240603	19.0778658288809	22.3766519766554	26.6193227368346	26.0484869914016	21.0589502615551	22.674521780439	23.948759179865	22.4975008476274
GNAS-AS1	147.343633055988	0.731442601465041	0.00129663611134112	0.00660081815825459	2.51149605838429	2.55661652874487	1.8969703513595	2.03741412842304	3.52072503596352	3.77758657724085	2.42077820638446	2.24824539801426	2.6543154919633	2.5595419227181
GNG11	295.350799623588	1.04020534673967	0.00298185685560453	0.0132136156787968	3.28883850600577	3.5473360934096	5.40429452389356	7.59365716801572	10.4968227258027	9.36594212078302	3.70849438568265	3.66686825325661	7.1583122460838	6.89818309942893
GOLGA1	633.527474024569	0.56553161196741	0.0109497444914633	0.0387008120752441	2.80075967135481	2.79330313383	2.10364250940184	1.93926310424092	3.55607926651427	3.42228121784187	2.6798182814402	3.04992659617606	3.44324451278553	3.11073646213179
GOLGA2P5	102.37502641073	1.0297487508427	8.64911932943418e-05	0.000642448707695197	0.444880561155132	0.340717100118635	0.322948467940937	0.350161637936045	0.637507568144623	0.820342118168835	0.336671051975618	0.551614035465217	0.697784250327244	0.693684527332022
GOLGA5	701.463148531579	0.479651474561963	0.000889471379536858	0.00480723810922083	4.13980544134845	4.5708467725574	4.48028373481799	4.85744459030983	5.61429691158482	6.66157439708471	4.60819799707267	5.19983993103947	5.65200918455483	5.50239688700267
GOLT1B	1525.83426953643	0.579612422502239	1.84789817632768e-05	0.000167566227322272	8.84811962033355	9.08632649386881	7.66968207139424	8.93817389152951	13.1905496539277	12.0351680299601	13.3243556781737	14.101546345992	12.0904288407754	11.6962930404893
GON4L	2326.12050365048	0.471142409844537	3.57502936320594e-05	0.000299517082027225	4.97816120582244	5.1930898779263	5.37337748955863	5.48313993201878	6.65915752636517	7.5694739145949	4.82549096633837	5.1240422170837	6.19115687606092	5.72205059397851
GORAB	361.747975302962	0.565093941968834	8.42013925422849e-05	0.000627822401693829	1.73615427197678	1.63628209704707	1.71916033670204	1.93651003572262	2.57029780530209	2.51281488949163	1.67908013997973	1.65811083754008	2.474095056944	2.33284388123106
GORASP2	1426.68559169084	0.541888738933721	4.08607549659065e-05	0.000335473272015055	7.85698391005806	8.10002236500246	7.78759249712552	9.01016522867234	10.812705516269	12.4632230117154	11.3945690676324	12.6812390305957	12.5433308012745	11.5430680667186
GOSR2	2900.89292319171	0.667203501369782	7.13875792225806e-09	1.38065615622684e-07	7.88067948552268	8.41290111829635	8.55173293198558	9.14704659703957	12.4893953750903	13.857432234988	7.89155282744455	8.59416582175891	11.3382390134023	10.203276174886
GPCPD1	458.976593119104	0.521411151617606	0.000578208691026693	0.00330869078505986	1.5805583111387	1.42811847902963	1.52475826314555	1.8045029053907	2.1897271884335	2.25597707511012	1.44806804440946	1.60695914190514	2.29097245492807	1.99372431626512
GPR107	2765.5399284124	0.400559781290142	0.00439633492982573	0.0183621406596991	5.7578152500799	5.96266610549025	7.04502123940176	7.11821093191506	8.08133035405656	8.59047036646655	6.46841272870208	6.57270739251114	7.54055500597822	6.6759688881989
GPR108	651.282709023846	0.663275644460148	1.40501344669031e-06	1.6932237973486e-05	5.09220172451009	5.49415606246452	6.24359926574764	5.85287797411837	8.64292125794581	8.88802403512959	5.36110559404232	5.677368583666	7.44520051691694	7.04709674526142
GPR137B	1024.31375175424	2.57319715516139	5.88260132146835e-23	5.60246230718653e-21	4.46111499044714	5.21735197545225	3.16363879897233	3.47259029580683	20.328447307833	27.1291255906011	4.15094391786284	4.73524110860159	10.1021152111893	10.1392845281164
GPR179	39.2921088436842	1.87782513726	0.000102176691524849	0.000742371599165491	0.0279244981659538	0.0471200032457917	0.0233521921179204	0.0144097325422425	0.106346043927783	0.0944315026762524	0.0357909790629499	0.0303486898230781	0.0632964612229904	0.0761233855043979
GPR27	56.9027245734096	1.53644146171613	7.40603319227908e-06	7.44747272925972e-05	0.275087310799752	0.330212442768777	0.194821324280731	0.331798056806322	0.930818064578289	0.672571229448777	0.534003302172477	0.654921502793511	0.585519662221734	0.466782182284683
GPR75	172.575362332583	0.632916685310465	0.00108287051985495	0.00567492435732434	1.3293871886486	1.38169206367975	1.54404968294281	1.58006488283951	1.99904948900655	2.41331755056272	1.40823804724966	1.4873372623499	2.09622399935748	2.05161162299081
GPR89A	174.919995429147	0.542538175170916	0.0150549681242659	0.0498690512091446	1.47388579611041	1.96150926897393	1.42656764184933	1.59393483440937	2.07625996786565	2.50057593307273	1.36929813154919	1.81866448769181	1.77980179409732	2.04281900174942
GPT2	1134.66558377168	1.41286451492288	5.36053964549155e-12	1.6775727888795e-10	4.26756288964917	4.10528792834456	3.14114339256313	3.07634920959831	9.67401173433525	9.33432732508393	3.84261116898533	3.99486658585079	5.94738306796529	5.81842413572034
GPX5	7.95125421039246	2.60647441272838	0.00328519832368435	0.0143698880995518	0.0245550959079131	0	0.0285201244415373	0.0329974935970774	0.0918443106649032	0.170523002766621	0.0190357246682445	0.0123549915716847	0.0208721388660935	0.0522955076037444
GRAMD2	3.84901820537807	2.59252124890141	0.0145814818056984	0.048683489645405	0.0108304979520929	0.0152295514743385	0.00628967507428799	0.00582167201737015	0.0515578025846723	0.0588619208662424	0.00559738198021284	0.00544940697511731	0.0306868627314376	0.0307545877037817
GRAMD3	167.6607894152	0.945476661564127	0.00119955082078376	0.00619246583984443	0.608430021472523	0.591760768862678	0.877456183543473	1.0738037609195	1.51025900608704	1.45128005648862	0.985266586469228	1.06126425896301	1.51704119212399	1.77810675284768
GRIK5	42.0500482853892	2.00048252523807	1.47209784035159e-09	3.20208541347588e-08	0.120200648510859	0.0874256279705691	0.0962827730507141	0.115854115626772	0.405900176033127	0.420495731052217	0.0856851033660111	0.0917618811359907	0.234878289030208	0.294245822834368
GRIN2B	56.3897313322279	3.34830134140378	1.93576111938552e-21	1.59374650291838e-19	0.0390087519237307	0.0379751852450514	0.069704125044794	0.0548399348224378	0.485672591120788	0.518236780551512	0.102352666016227	0.0815292189153892	0.516923585962218	0.511247783475084
GRIPAP1	1162.0502037341	0.418208349459329	0.00168989750056743	0.00826273688573855	6.68071805482458	7.07253543774145	8.20307964210823	7.78852218150892	9.9017490577611	9.50203767799554	6.7110654364341	6.22026995573984	7.92453335617352	7.14948879628937
GRM7	15.3536409459185	2.4306040668124	5.86286772015703e-05	0.000459276377133379	0.0420547290142603	0.0118272430888234	0.0439609561455543	0.0271266019549647	0.188758583277338	0.14729443163373	0.0521630048941562	0.0380879994948751	0.243079913078864	0.238839591226349
GS1-124K5.11	630.91490074005	0.590595289820625	3.63946742561325e-05	0.000304336860806264	3.58939588719183	3.24771252881763	3.17609895077739	3.0418840334126	4.73922824364204	4.87241131980363	3.02803610392943	3.26491912439538	3.98305495988001	3.80446151558996
GS1-24F4.2	10.1067094708833	1.8386783626287	0.00585358827703436	0.0232357440953052	0.145066000598829	0.135991908101779	0.0561635000304414	0.086640796931205	0.350768868217497	0.38933784105218	0.199926742989447	0.275741963793368	0.694177898779732	0.457703900184671
GSKIP	340.377918670158	0.571805705860139	0.000320979543458244	0.00200900127040526	2.05498554802823	2.20336937367786	2.24509679888738	2.60963578468552	3.37150671253469	3.24196683395445	1.10851552844731	1.27308040674747	1.59392163634759	1.60473361661288
GSS	1631.80033174789	0.522419981527803	3.02902592441353e-06	3.35439395111515e-05	9.58268148233316	9.93680212592335	10.9227794310121	10.6024283010346	13.9882838401265	14.7918110758666	9.81275410085473	9.88854444543423	12.1346729263535	11.3337992869019
GSTCD	520.827685270385	0.607772975259484	0.00754309553727124	0.0286611602913914	2.30870902200637	2.65356487624269	1.64028371271454	2.17833465423315	3.10115320198684	3.43596232240619	2.48790583457407	2.57454761223969	3.24752268557175	2.95828061337039
GTF2A2	860.365961355815	0.589465354044261	1.34195322955964e-07	2.0347567944588e-06	8.10736934038632	8.26526254350058	7.84352061114191	8.63660538149415	11.9918766929542	12.1504794885388	9.82751012205903	11.0047155005666	10.723382244849	9.92820077068793
GTF2B	432.820442515937	0.730670687572415	4.5938290879959e-05	0.000372131837707585	4.99589472889715	4.96785191667121	4.0781870830615	4.56696544572861	6.79502734660266	8.28494358191335	4.46942614593642	5.47453056326277	5.99371698852324	5.63151088082535
GTF2H3	997.886470943737	0.589445638754715	0.00146368291321979	0.0073034917156668	5.74408153107655	6.28713501897405	4.50833306887612	5.01418208585812	7.86942051484569	7.98331716918499	5.18770014125372	6.10056725184201	6.72883061769586	5.77775827643125
GTF2IP20	344.385384867231	0.772174358159423	1.39757287814353e-07	2.10640175705824e-06	1.91759717761756	2.05850617505131	2.12887680162894	2.0615158931574	3.20055762743227	3.60179118656989	1.94457646417566	1.71663531350808	2.68749858349928	2.52509044790717
GTF2IP23	172.897585241568	1.26457508644292	1.29030645205345e-09	2.82760066899624e-08	2.07895039406938	2.97208619112232	2.41464843668292	2.43985199303684	5.82019806592518	5.75398952167252	1.89817068684085	2.77198463962265	3.94659894547919	4.18160774114295
GTPBP4	710.477454132345	0.338382800233696	0.0100380382333078	0.036101285085252	5.22698678041675	5.38804226228756	5.66792432554594	6.12181772033006	6.57951185721495	7.24522609091266	4.50232324572877	5.03188324196776	5.0008881816217	4.66599758268514
GUSB	1432.85332388025	0.434255669135682	3.32898885353272e-05	0.000281852256657343	11.7915750375545	11.4539746793295	12.6233942962241	12.3095986766864	16.2701117232176	15.5341054689676	12.4447582485604	13.474102192063	17.4962656834348	15.6624362564238
GUSBP1	582.105944075657	0.416876400481032	0.00534605562254634	0.0215435687261182	1.74630635155437	1.71686239024245	1.85443727814266	2.12663359326919	2.55482626439612	2.30049692361054	1.77470368210956	1.89022827917931	2.19206253677107	2.07938785222686
GVINP1	189.134013879727	0.710160862230334	0.000356940218664125	0.00219633043552168	0.324535486722469	0.38459935784131	0.393534613830582	0.441052644895545	0.660723806697641	0.571908491591831	0.379755514792182	0.507332676578347	0.525115675049224	0.481065979266687
GVQW2	17.685801417454	1.58995980406965	0.00619601386289623	0.0243895371426203	0.131467548887499	0.101676349186716	0.0458088724437081	0.0565337589415414	0.241396108561737	0.254045812509564	0.2038338659166	0.231519421708339	0.290547561383762	0.223991377700994
H1F0	7799.70810222415	0.887928716523258	0.00014091685478277	0.000985788944800131	64.8351909259116	68.145798067513	47.89838616187	43.7092334378558	101.139743267373	102.32014018995	45.5049570083109	48.6674889717368	78.9178974566811	74.6512311049008
H6PD	892.981620018845	0.593370444376668	0.00314751024664336	0.0138570672252897	1.51596659924914	1.49489605130524	2.16639970451114	1.92474628787334	2.75876977421097	2.47054767087813	2.18381767580469	1.95229081673511	3.10566642014602	3.22041252465134
HACE1	455.452129014191	0.586564816976524	0.000818312444154267	0.00448455581759068	1.44621218921447	1.5619856872026	1.9478269897266	1.86492781696314	2.50660831194378	2.49147862695249	1.91982388460717	2.25014315445953	2.76311142333156	2.503963495372
HAT1	1572.03416218318	0.555610892876939	0.00435884962315988	0.01823760900272	19.4389019908221	20.1893695344274	14.1715644454057	16.3533207189731	25.713327176953	24.7148164453447	20.3685445568723	23.0205009306292	22.672292102717	20.1578827273547
HAX1	1257.41410201918	0.961294244562605	2.17923127035596e-14	8.99200837292777e-13	17.6302670356145	16.8324811594806	17.0847650720785	18.481644060631	30.8540748092412	35.7316621416916	16.5964371384305	18.1831074939991	24.2176344281821	21.8946818065673
HCG8	68.3149277616594	0.923542361917796	0.00165528764041416	0.00812155748717826	0.0794811013028617	0.0584612537697977	0.0965759999608898	0.0762443767273878	0.1563350307607	0.132912712457418	0.0682512792275517	0.0713689533027642	0.12472602634022	0.123265163817482
HDHD2	461.624728448959	0.616906422315494	0.00523366821571027	0.0211641038082624	4.0883252482839	4.37851635494095	2.91719043521079	3.63708053691775	5.12956598017529	6.12419772023056	4.29134608663244	4.38519834184329	5.45963204302495	4.76972217262667
HEATR6	2100.31140874286	0.393319694075427	0.00216959408576029	0.0101881871527214	9.90338530859233	11.1228593786341	10.0818168793315	10.6076870760904	12.3791659754025	14.3681790938621	9.39825896520289	10.6314592582427	10.8543184530898	10.6068313460407
HECTD1	5311.13326107453	0.340256307938549	0.00512569397579823	0.0208326648580367	11.5447160069749	12.1555950402187	10.3764958019629	11.7950970142878	13.7787483002084	14.5905469600898	10.72424230997	12.0260959608101	13.7006566327189	12.7699737277305
HELQ	525.614938244471	0.418990611045584	0.0025905972279254	0.0117456851669629	1.96682859758172	1.98110486260006	1.82672736021025	2.20441847365715	2.64666844535763	2.56494581565004	1.61845365493123	1.91606777740592	2.45043483213511	2.30235268804748
HEMK1	1224.87560977517	0.80274198135553	1.04356689684798e-06	1.29574384464867e-05	3.1262800384067	2.96989299914594	3.92894561896053	3.67686905798669	5.52971926619026	6.13513246189706	2.87999099564543	3.07061179570863	4.39548959892056	4.43055451942297
HERC1	5861.95751487241	0.407262643996228	2.26992255712595e-05	0.000201175882967817	7.21432175555974	7.25956250835533	7.68166290206008	7.88187811787793	9.41029180072529	10.0391058219237	6.95377013761045	7.75680142427244	8.97404457136639	8.38593237480219
HERC2	4803.88241027661	0.360400050956861	0.000144467922365192	0.00100807141550587	6.23131499422915	6.32578978645975	6.14554393081902	5.98186135712529	7.78935550329555	7.69423451558261	6.51657135090086	6.56649277601786	7.99739811764553	8.21535833518755
HERPUD1	1912.50183687585	1.42715221572395	3.80336014665309e-31	7.61493209362282e-29	13.2543092976317	12.9382408912316	13.6601008932867	15.1165741572699	34.1500275380082	38.019832767414	11.2170136994105	12.4792100197238	21.3395357738962	18.1075235745535
HEXA	3715.61488064341	0.407297235782353	5.06899688120197e-05	0.000406326915604629	22.9712269157466	23.2344224515326	25.3106812622781	24.6697687023733	30.1957712653564	32.08800041272	24.2461467730487	23.557453012048	29.1577673748488	29.5519688128011
HEXIM1	983.786348182372	0.336665395774151	0.00829091729552855	0.0309683425545723	3.83364318043681	3.86102389814483	4.34450005975638	4.28157271401967	5.32570320048625	4.7425335989834	4.79437699920199	4.27772411630937	4.19707524343663	4.80830143015945
HGD	28.1850058171506	1.63635738470027	1.22338806810304e-05	0.000116638930583915	0.177383080887014	0.187073445722098	0.175122077541021	0.171626366697157	0.542841000347786	0.53558165696979	0.15584670902519	0.276678050062026	0.422177949124327	0.35259140251042
HHIPL1	18.5631833184291	2.24156609314436	5.34629347032031e-05	0.000425265664350219	0.0171376838989857	0.0160656964709001	0.0309633139098253	0.0122825962066968	0.0725179603113613	0.10348934174945	0.0236187756618594	0.0134133875597739	0.0798500881892764	0.0594790178342951
HHIPL2	45.0435403365275	1.93373840717018	5.02168730308135e-07	6.66243287597819e-06	0.249328666141887	0.243471656242824	0.128706202607963	0.156357354275382	0.706494697422333	0.7444460187671	0.329301766910486	0.341504638827592	0.63579746084408	0.422833762334549
HIF1AN	4647.65744820549	0.642484682464084	3.04260522470855e-08	5.20968527251117e-07	12.1503176002462	12.7877907882754	11.9554529637042	11.9864082939167	17.4309658910866	19.8389766846458	11.7058910986223	12.6629869258129	14.5188675503406	12.732412657711
HM13	2718.49614036936	0.661464815689338	2.58402941792748e-05	0.000225945480468805	12.5131333023147	13.0835596974583	16.409003325508	14.3640955274555	20.4246584315436	23.0854575364586	14.8458356368809	14.3556715826153	19.4282582594096	20.9655672730907
HMBOX1	836.177784470778	0.563107903765176	0.000110206555431987	0.000794488257019714	3.00558166205661	3.11869330791967	3.48202456244787	3.76145946316646	4.60805483521311	5.02929786840242	3.71535533893802	4.34825739407065	4.81486486470668	4.36509323185128
HMCES	1087.44829150896	0.639440591515094	2.73778669689353e-05	0.000237504006955032	9.48918333327467	9.72761780677869	12.0355539139508	11.377251637322	16.9258486147192	15.4930686489871	8.24138278198774	8.32282237401415	12.0050970862787	10.2715357173736
HMG20A	1270.4592224337	0.388673200990833	0.00336218607165026	0.0146015174750816	5.53995030796886	5.98960764837728	5.85866120994694	6.66949330607538	7.23595457102044	8.13312155673757	4.69688437212071	5.40135730684336	6.75754550765405	5.64983717118161
HMGB2	2402.49947358337	0.421865121649057	0.00569466833504657	0.0227309382408667	30.3587440750411	29.7690098666861	24.9519514859986	27.5126514091023	39.678075699952	34.0734911725623	29.272960050507	30.7672924413275	40.0906689566858	34.3452090748434
HOXA11-AS	167.170560238037	0.765119836568176	9.42558714359956e-05	0.000693111101348416	1.77234211935979	1.99053875557884	2.0852648248875	1.70739981330096	3.33414414287207	2.93280227937324	1.2728497212641	1.35501316214595	2.09998779729047	2.50005611947868
HOXB6	260.33878260321	0.474829404941827	0.00662685927129256	0.0258315560842707	2.6804319251459	2.70720725092111	3.37269189979941	3.11030121985779	4.16653140123742	3.89242597308247	3.17737592326416	3.253933245629	3.0499226114927	3.80571507840901
HOXB8	50.7442557838436	1.34628745089188	1.20809622442327e-05	0.000115469605564857	0.40093636028247	0.316270082125895	0.488393442027378	0.378462969897187	0.95763941696022	1.01569550437518	0.677224881559882	0.482190312859146	0.687143327585008	0.666444998711021
HPS5	1077.07471410656	0.597175860322441	0.00689369370080334	0.0266827744539662	4.29601466472837	5.05980002066798	3.21615832810932	3.6758991490137	5.77354415861702	6.24292856422389	4.01759891260405	4.68337222313479	5.00137507176911	4.62652354646504
HRAT92	25.8163430669307	1.16691232985317	0.00469817829334329	0.0193540339841981	0.0966095245161876	0.142999667579927	0.118115290043104	0.0929275678209079	0.269717348147702	0.221076375917479	0.0998588271815039	0.138153191550578	0.218984813477006	0.28877382407544
HRG	9.80688698457135	2.05178757167653	0.00366908218489944	0.0157941751809781	0.0353885848717517	0.0746436974494129	0.0308272114311008	0.066577970207582	0.156431600100222	0.256441281709406	0.0731576435885287	0.0979324691726789	0.0300807400829457	0.0125613030671029
HSD17B10	1037.19600462714	0.552929466228305	0.0012228977244023	0.0062872001769023	21.8070670437515	22.1263400495815	18.9210146450772	17.4932357457523	27.1424258159358	30.4734283465035	26.6161732472432	27.2910601988123	26.5613247297313	24.1808345023835
HSD17B13	26.8312344825411	1.6749497246447	0.000144435678294705	0.00100807141550587	0.163618686625444	0.188244118098332	0.095019488439765	0.111935427591387	0.45519833571091	0.413182144375693	0.130684975027381	0.149682501143815	0.488880001876493	0.401259480954555
HSPA13	1687.29290438087	1.08420539653772	5.63281136336983e-12	1.7565398833843e-10	7.20951415007065	7.25118452357141	5.80754449704307	6.30818035547203	14.2403382474576	13.3092982316852	12.0008543700758	13.4613367426994	14.081121955185	13.4619604721651
HSPA14	1501.49721310044	0.714171785004092	8.70919817874948e-07	1.10552854979386e-05	3.80214248090403	4.02288724031063	4.3796507000805	4.90009295381275	6.560240727083	7.13086272049346	4.56389570068421	4.91971415427451	6.02247700430259	5.81951102439441
HSPBAP1	374.072687902914	0.47245254841918	0.0116600022228809	0.0407371761183698	3.19832001501479	3.23249946833363	3.87306778616314	4.28818070307805	4.60962943924279	5.26737189240014	4.32019749249537	4.01397429539033	4.4383401182697	4.34751052713127
HTATSF1P2	180.857299623186	0.597629477437208	0.00274712229829955	0.0123410371682151	0.741504317330118	0.809165601665385	0.623500831432689	0.714118374428812	0.998030897519832	1.1334235212901	0.65467057247252	0.687886103528868	0.809744936772103	0.866365263750768
HTR7P1	516.231725510721	0.946470655939987	6.90686117171283e-10	1.58041541538193e-08	2.04711957463865	2.02187650291033	1.94837481711134	1.73353449068796	3.47489151327664	3.82140990050912	1.60797008576068	1.50006318721477	2.05310703312391	2.28946848827621
HTRA1	270.855296569085	1.41045909634861	1.93181219588469e-12	6.3978569697918e-11	1.53884006232713	1.50170561287673	2.03149384512625	2.03401531286135	4.76931909079145	4.45841413484503	2.51192549405223	2.69091716431293	5.97549645039214	4.50106447237738
HYDIN	239.327935115547	0.727466157243703	0.00801676327020927	0.0301193256362559	0.147154908430986	0.182783950956389	0.214595429600553	0.234662025271748	0.247961948888571	0.380133784505248	0.174919855366604	0.210607109377881	0.237195404390026	0.255362086106884
IAH1	156.313463557561	0.76807694167076	0.00425274096758546	0.0178487477627175	1.63311236017571	1.69820636794071	2.50252565365304	2.59663602270064	3.32251566340657	3.67955730520492	2.76611500260033	2.59631730505943	3.37514857710249	3.29296638949644
ICA1L	107.763629026887	0.949591809450904	0.00097752362548383	0.00519526229560573	0.238807764623509	0.212676487076786	0.13868459708343	0.20110568904121	0.341048130158221	0.406188285456727	0.199528734477505	0.210274839810119	0.36087038039524	0.37014337621208
ICE1	5896.45138629332	0.325803968694906	0.00486525011124865	0.0199026797562317	13.823326461301	14.7890173448394	14.2370609628836	16.2255800286962	17.318777055132	18.8241858024886	14.5826871542569	16.8018682864833	17.7689444706122	16.3528078595735
ID2	66.9859391975958	1.04079165979873	0.000847471444368733	0.00461849655995444	0.849527108426994	0.808640055701974	0.531302318225412	0.941386559266298	1.65319759196826	1.49955010848067	0.986173348941957	1.02586284856505	1.7626857919817	1.94842939620403
IER3IP1	479.880350957676	0.597794696643732	0.00684893163647537	0.0265270007700724	6.56659427828876	6.98366069382509	4.68078957257251	5.2499714387282	8.93137067859447	8.44609424202758	7.09374380070501	7.77694145005332	8.97368744823727	7.57311273676565
IFI35	4.74743462326532	3.07503941174539	0.00623548431536316	0.0245029325260329	0.0285231994066319	0	0.0165644882756448	0.0459958662748381	0.271565257773986	0.120570142617039	0.0589650607323542	0.143515582096689	0.177797227716931	0.101244102720849
IFNGR1	517.80667138563	0.871787026769847	5.39108375019428e-06	5.60056041242176e-05	3.69153435716727	3.40544264967322	4.57086115153407	4.86355661475293	7.14826002816464	7.61688064039583	5.63227584825553	6.78652693641185	7.7100105715586	6.94859289900168
IFNGR2	838.297125105833	0.38619519146201	0.00289311828602349	0.0128786890049136	3.85085435191563	4.22250102389946	4.47805245819356	4.52346488362718	5.21872408548545	5.66942489839303	4.68927041013897	5.2881033954265	6.42312810152559	5.46749735904768
IFT88	443.903374772521	0.685237353171961	6.32825095141984e-07	8.27746499725806e-06	2.32398179983903	2.10277550238233	2.08992271629595	2.24012687555076	3.35428759675848	3.52918262807222	2.39707729359216	2.59026679733093	3.57852706050929	3.33442830055602
IGBP1	1506.37893823529	0.33596733116396	0.000403973043902672	0.00244534990396879	17.5907381882767	17.7136014129463	18.0612793848899	18.668502953417	22.3480445564866	22.0621571204371	14.3638532732806	16.2319581558153	20.4111412158607	17.1230613487219
IGF2BP2-AS1	4.81359901622895	3.4230416744493	0.0025191563450152	0.0114987087157572	0.0349320698154375	0	0.0135242392844912	0.0125179257225229	0.126698356710827	0.210944310354529	0.0240713017359382	0	0	0.115726440079351
IGF2R	13469.8361234005	0.496235358841749	0.00215770037348328	0.0101411882016397	15.9950411855574	16.3881774000618	20.5183426822744	20.0070444536288	23.2678358324545	26.8999453434764	16.5881225234495	17.778475648568	21.6603393233504	21.3562905753565
IGFBP4	413.285148240145	1.09512417944458	0.0132909739017543	0.045250950565219	1.75399817460281	1.47985469943313	4.13000993455814	4.25982884961884	6.39788453898271	5.68109380143537	3.1397708154946	2.70375397845396	4.04807478945688	3.7581666036809
IK	1436.27841436567	0.654647064390259	4.07786124050325e-07	5.5140320181448e-06	13.9944250318714	13.7063444686891	12.4661685020195	13.5887873662958	19.3724570191299	21.9643283062048	13.5318719800832	14.5833340205486	16.8838452676931	13.211439760731
IKZF4	363.169517034627	0.749576852132882	0.000858076632470933	0.0046690710894087	1.26564829507963	1.39342433373851	1.12435528563357	0.896543898679426	1.92605152095513	1.91960483370944	1.12905489156842	1.25717648965638	1.56785717642013	1.58803353194508
IL1RAP	1728.61389304562	1.89314555701119	1.51110329618038e-20	1.15255969590485e-18	2.28058024504609	2.42741275843407	2.90166653557814	3.53203147479411	10.5518589262549	9.62951941247828	4.98927884142941	5.83038420096767	10.9010472249096	9.92962714105162
IL1RN	7.68380366035208	2.67842523448267	0.00623019591241739	0.0244912587641415	0.0590577365849572	0.0237272519893622	0	0.0272100486718162	0.137701266534034	0.213979193002317	0.0523234684681325	0.110370478422679	0.200799261178395	0.215616877540853
INAFM2	746.814385923798	0.436222523878515	0.00023769895606174	0.00155472274469105	5.05991906767083	5.71094439338995	5.45662889155406	5.46128863350991	7.18291565272224	7.13902160232468	5.1261918399838	5.83369259932502	6.60055497633344	6.35630268961722
ING5	1576.45068587538	0.360269949671041	0.00135581933853165	0.00685457128424364	3.29689213152234	3.14190808086894	3.50848158070745	3.42680337765738	4.39287533708015	3.99568692873266	2.80313999043669	2.70201472478974	3.38005145850442	3.18600323247428
INO80	3224.37952344472	0.335820761527561	0.00672847052125482	0.026135123922837	9.51336567887071	10.4152328185437	9.93411352550028	10.5815924585676	11.468438018722	13.4488361517652	10.1448082865449	10.2847165763998	10.25213082412	9.82851518514405
INO80D	4819.05872586605	0.754752015074796	1.57255888280671e-12	5.2574791188181e-11	5.74938393529087	5.6888537252016	5.92342163507249	6.58896641246089	9.76496819485269	9.96556970985032	5.71072817337922	6.2742380967568	8.49846873878486	7.81569235244247
INPP5D	539.577639454295	1.52167167078232	4.18726469977702e-11	1.15414311192868e-09	1.03374301431085	1.17809830362645	1.54595612578266	1.68878133233843	3.65288685282355	3.96988104599404	1.82624637359184	2.11112318746551	6.21786435587317	6.53760242602414
INSIG2	639.201862977722	0.416405970007947	0.000422451194152902	0.0025411975383339	4.24635919094227	4.39929330484061	4.51419612917348	4.73080606580542	5.95905745823225	5.70264188053563	4.05716803012031	4.22142680671794	5.59893808821949	5.13517385872415
INTS2	2654.24855269627	0.506598939739354	2.18828501793959e-06	2.52491118081714e-05	7.65250939082103	7.79464615686439	8.23130123117994	8.85967641098371	11.2246889485964	11.3437027187041	7.83532365570848	8.36283741579932	10.6940487991547	9.67292515878622
INTS4	1699.59059378985	0.801267652228458	2.15654043311692e-06	2.49620963299662e-05	9.42017382753165	10.7308512695059	8.09419064279089	9.07428768600926	14.7529554137072	17.017822266355	9.27473218291336	10.2315808766932	12.0493949613296	11.502088837213
INTS4P2	29.341857748268	1.01121158377404	0.00998265467968604	0.0359461256491699	0.312577482185233	0.297751513722842	0.199092407159193	0.260157614676686	0.480000809131055	0.572357456266245	0.354357336131936	0.192788182963596	0.434253821295466	0.400853347876665
IP6K2	1633.63870746274	0.499853719905234	0.0059220933327605	0.0234570673878352	9.41343619268118	9.54704122671725	7.62510301608001	7.26222922830036	11.7353659615542	11.6752991336218	8.28313908885584	8.75130926396708	13.255744063711	11.4263180225309
ISG20L2	1047.7413078521	0.323733159624929	0.00191157672925696	0.00916713946455588	7.33898883006664	7.72380433667008	7.7940692630077	7.79125718665776	9.19832745135773	9.52776755243246	7.4640173966887	7.80033277646347	7.72405577293281	6.92497764662437
ITFG2	842.093854175814	0.590876058620533	5.47328588194195e-05	0.000433605323533881	5.62061453275588	5.02066469120553	6.1178997302563	5.24221582779692	7.67904236514626	8.51006276559705	4.86420020638007	5.4783239273462	7.28524798315772	5.86649745949719
ITGB2	109.877433273009	0.813509168018118	0.000286080004816955	0.00181965473099998	0.514879181835552	0.607233433132724	0.553006984357708	0.678510449706463	1.06927314229997	0.949476500200729	1.43635774881802	1.30367415413918	1.09178139549499	1.12406107834483
ITGB2-AS1	119.121808011101	2.56838223846599	5.86230543853791e-30	1.05395877062856e-27	0.357284334947372	0.39773611090477	0.397686044196066	0.472121800663787	2.43987575020618	2.26540977777318	0.461626258343065	0.449422490908213	1.2063486222965	0.771484290044049
ITIH3	5.14461287329212	3.8773017101901	0.000533718703297311	0.0030963417297976	0.00586993731614914	0	0.00681778411081859	0.0126209708799358	0.11177364906733	0.0779829465630692	0	0	0.0798323230387034	0.12501329772907
ITIH4	78.7124354007719	0.771932682128575	0.00329382208488644	0.0144004593830308	0.352956130336406	0.450503399902196	0.37210813595151	0.502036310746786	0.686860041256383	0.708279415747804	0.488307215553116	0.568291979060909	0.855433453765037	0.786391903558226
ITM2B	1516.09642033951	0.716127143883724	3.20180639597863e-09	6.59026015078825e-08	13.3514448699292	14.0808288180383	13.5853266184745	15.8494897852818	23.1726683566184	22.4388375726406	25.8710758948983	26.1806181211458	27.7275356323992	23.7891602120983
ITPR1	797.103424621286	0.592659501771775	0.00109295396627542	0.00571882262821616	1.5595578664044	1.60804257122457	1.2372420944023	1.33417352787377	1.96730836271325	2.26193045191951	1.2989642479728	1.37847543338819	2.40075653427404	2.26123691636343
IZUMO1	9.83526848349098	4.50173564479294	1.02272007286372e-06	1.27344911404847e-05	0.0211220374752902	0.0297012342734137	0.012266356839192	0	0.330378349737733	0.344384082034959	0	0.0212552698602917	0.119693308189446	0.134952151138573
JDP2	378.246790441481	0.523210008814918	0.00238410614691971	0.0109962215189996	1.69761086781984	1.60706332080781	1.85546297659452	1.50216573097711	2.5415559922694	2.14094820059168	1.7417732609873	1.52363583005084	2.54798320020169	2.13787558974184
JRKL	560.535446534229	0.908144789145345	6.85405468483626e-12	2.11491400161349e-10	2.5417206754159	2.40145710659729	2.72014880997109	2.82374249072886	4.95125732586124	4.6679316919562	2.28138627833513	2.50247758698009	3.60506856556166	3.14083595975744
KAT14	349.77212913602	0.893505267329095	2.77439114035414e-09	5.78485177537273e-08	1.62611145265849	1.44622163808238	1.42593210532935	1.59873885505707	2.69059913010219	2.8479638120022	1.12532397285142	1.49184596774105	2.17899054711203	2.11144470980981
KAT6A	3023.82574707704	0.506301828025705	8.06816561964603e-05	0.000604649128254119	5.83109388030606	6.17108905632627	5.24933901549282	5.77880163711986	7.61376024642386	8.36642585124058	5.83619685124543	6.28675091662481	7.89380258652108	7.33398177670403
KBTBD7	112.226679500632	0.789193595731575	0.00533556800132904	0.0215152246265933	0.523000304577438	0.450746680891289	0.725022948973414	0.761761192248896	1.1014363767309	0.978036307844391	0.755664224685138	0.8658471632805	1.08350762517487	1.0459761400971
KCNB1	562.495867330705	0.764359100502257	0.0108907671525745	0.0385555787261911	0.964556998588832	1.10030199188958	0.559280434730982	0.692377492390152	1.30986872034625	1.44662653479427	2.24130192546959	2.64541362710936	2.58884289534655	2.47619471286959
KCNB2	91.6895310533103	1.20826339411787	0.00750645675877183	0.0285465706092814	0.238887767224723	0.216946703944611	0.52024146594362	0.567136821274525	0.74460044157141	0.991768043182752	0.77677660617196	0.756241376905364	0.721982549990076	0.819675873507713
KCNH8	188.208360914066	2.81774350929732	7.01399228872212e-44	3.01413488134134e-41	0.239430372265822	0.282217455742719	0.241285998484852	0.302823531995774	1.73842069516868	1.9221277779585	0.254762137768171	0.194878456826929	1.24505626936245	0.869863414646838
KCNIP1	59.8055519877106	1.80403721824631	1.81397143865835e-09	3.89760521679531e-08	0.225903326220157	0.208747414813724	0.307360616990151	0.277551691255359	0.956883375703568	0.787316670394186	0.847275831938923	0.746935732309888	0.958274505912957	0.943894150999952
KCNIP4	76.1663605329462	1.51377293202716	0.000588483921469294	0.00336202925174043	0.371630440784449	0.506740957205532	0.215819690893983	0.187654223852388	0.880730660703241	0.904466483624346	0.11640291521706	0.135990760041083	0.49776688974906	0.511656867824885
KCNIP4-IT1	21.4065040100563	1.636295983799	0.00198407238626646	0.00947097571759112	0.0181021523447857	0.0178183277911584	0.029435270595429	0.0447597195844028	0.0935603294669282	0.0743331649823628	0.039293075858659	0.0437192065688534	0.116941626124652	0.131078626085584
KCNJ11	63.8287805392919	1.63204849312957	8.8424878260734e-09	1.66983700972762e-07	0.229767997461661	0.2528557865406	0.243663668946863	0.182574420162568	0.733725129077535	0.639456586349025	0.232332913014494	0.175926217896614	0.481187891819046	0.609904233258128
KCNJ3	17.2742105314708	2.46722806747656	0.000402399371416656	0.00243901457289954	0.0474413500877961	0.0205263801242671	0.0127158303037192	0.0392322298488895	0.233286429218039	0.096963852082719	0.0301765919817575	0.0734470737444675	0.177846859398624	0.139897173667499
KCNQ1OT1	1742.50540630112	0.902311686669167	0.000881576539469735	0.00476895825880174	0.381544580863985	0.397876206351382	0.243712336090759	0.245648127874568	0.550422650241922	0.610651075983489	0.347140384789	0.364968965935691	0.456667489556875	0.45364417528541
KCNT2	57.9361739652865	1.6986038123032	0.00451327254565373	0.0187589877286797	0.184396726227392	0.184014854183766	0.0552702311499661	0.0511576757589124	0.396429096683746	0.359198909078838	0.0952993036110579	0.146652142199236	0.46179171969734	0.333595433556352
KCTD16	70.6850920784742	1.44030728370545	1.27889959571374e-07	1.9436576632024e-06	0.209810337136377	0.193462023745022	0.171781062090664	0.173789770637773	0.439746944522523	0.552487147820698	0.458620299203748	0.477646882339937	0.339141047028156	0.288124737629274
KDM4A	3238.35882853656	0.335692451096904	0.000786947483838401	0.00433153005865317	13.6440398581014	13.8431860500411	14.5338781859658	15.0080767923831	16.9497055987945	18.1878969532483	11.3117714645124	12.8707282125413	15.7099205723795	14.2356977434062
KDM4D	36.2111500403101	1.77138279298489	0.00201551866128281	0.0095976819711194	0.215939430231904	0.210866770918247	0.0836027335580998	0.0709335084431386	0.375288461882431	0.594041512124904	0.198401954011959	0.187120753911397	0.387497016849117	0.340659834188591
KIAA0430	1880.83856590689	0.473575236436857	3.82813866907429e-05	0.000318601677895228	2.24358864326608	2.33467081907102	2.32981458662498	2.35025466387811	2.91881053658598	3.35727529944991	2.10423347687878	2.35595349651512	2.91885152888027	2.66217344684959
KIAA0586	1853.79873576157	0.567896623339739	0.000203278335020087	0.00135408732881623	5.04362310237868	5.5379485199639	4.36728504442614	5.01125951434659	6.78969344691121	7.66335652226944	5.07178108211434	5.58220104200509	6.8547454221658	6.84200694180446
KIAA0825	96.4916999001382	1.80404250211642	5.58642896347795e-09	1.09851888289641e-07	0.148630132239125	0.172651882361695	0.0875660176485575	0.141259255818286	0.439467702069861	0.496895007074123	0.153629062595624	0.212429420092369	0.485819460373771	0.382295578785227
KIAA0907	1793.32764669571	0.556540318820858	0.0022838899388711	0.0106145757934502	11.9224018241708	13.0868879602944	9.77841825429736	9.87071495230692	15.8674553189895	16.2485307265371	11.3872824713948	12.3333703364342	14.8763100335895	13.9921244903313
KIAA1210	153.233532980724	10.6360194974148	3.80018101868715e-24	3.98543984334814e-22	0	0.00320396750086416	0	0	1.32948865652662	1.14476471955997	0.0235513566958853	0.0137572452163238	2.01422542554387	1.34578050651436
KIAA1211L	94.6458472109947	0.759920764146159	0.00107545318964157	0.00563940766318298	0.437726793685388	0.382270008239573	0.412078572378086	0.480485809065574	0.770837026598795	0.651086783507808	0.876322303466106	0.788241436948734	1.26896562228948	1.29531741656295
KIAA1429	1909.76654737696	0.525862546688456	0.00017691795606569	0.00120027626797127	5.37277764928939	5.87280011564357	4.98479936071166	5.39536725099196	7.01941495363953	8.18646958410155	5.67824840034708	6.80219806807962	7.04381611324873	6.11257842563057
KIAA1468	1006.14705644786	0.405822568317415	0.0124703508440798	0.0430531658026191	2.29508645089453	2.70226053876221	2.06786594850376	2.20200696923775	2.95518932150047	3.04192129174791	2.38754073119778	2.6322228404907	2.9693118192633	2.95010771447274
KIAA2026	1659.79293218242	0.537896763840759	1.56085031361025e-05	0.000144587916274968	4.17959499911518	4.55842207968589	4.13307435806102	4.4134706499836	5.7116859983845	6.53921115367657	5.0005506373088	5.41619917858654	6.08314488980275	6.06073282875711
KIF27	249.046550429775	0.64940807924605	0.0134538202938035	0.0456466127010444	1.13271767366422	1.15985536347701	0.781427085498171	0.772318650137207	1.37002728659203	1.57920077140807	1.06080533033953	1.17428794519413	1.55947364880619	1.43015390303971
KIF9	235.536313038867	0.987389984866616	0.000398414300068817	0.00241840966134626	0.747120994726862	0.890558906751438	1.35623759126151	1.26596079348361	2.13329632831652	1.98392645755804	0.741563784189508	0.702043334569567	1.32900433252948	1.1591227413919
KLF13	4399.38384727837	0.628206885887388	4.18812785975419e-10	9.94482813490689e-09	5.3933994385522	5.33171138790442	5.96925043416339	5.86544693710206	8.49986021968125	8.52691412934626	5.9705952622786	6.20438432709523	7.06424762978151	6.97359088830783
KLF15	26.6202048594224	2.23747528472186	1.09040542398381e-06	1.34820022211725e-05	0.0564815829834295	0.109206439205692	0.106603142368011	0.136621384974767	0.50894479002904	0.426344210102684	0.211632024905727	0.0781520496566131	0.344072042836545	0.571377609414694
KLHDC1	58.2543533780581	1.05707834015427	0.00141467201091854	0.00709308655673698	0.251737638761615	0.298093993034693	0.377025234813544	0.448677625311966	0.765881208220152	0.632069946564347	0.479323932932087	0.399987687003036	0.683234845201206	0.931174857800453
KLHDC4	844.97887428871	1.14019102793326	3.92066794552583e-13	1.43019148099834e-11	7.0199584031866	7.57230659414599	5.93274741996865	6.42472484452078	14.5858282881013	14.4353964236166	6.349055276395	5.40042442993372	8.97151578858984	9.61294395004954
KLHL15	346.170634025043	0.989151737631391	4.88418484324701e-07	6.50941397527753e-06	0.778297944293453	0.814824683279044	0.903973428044672	1.09016652459882	1.88921815321803	1.58836315304588	1.10688674594176	1.14908508609921	1.64827373745344	1.32685268463828
KLHL28	1232.6106063987	0.85309986230731	5.82569089552335e-10	1.3434927734061e-08	3.1722689106627	3.17994644720623	2.76034270927278	3.19368840979918	5.78137753299485	5.08307961197744	3.04359186077202	3.57155941350593	4.63056874017514	4.35910044382455
KLHL3	277.307071349941	0.492370344950054	0.00303299276487424	0.0134199647223303	0.636112621687584	0.744873011309475	0.654691679465963	0.642481941616786	0.868269871794377	0.967841961143579	0.617729207672282	0.722133960708739	1.00059045901303	0.809952821766794
KLHL5	5628.40130952897	0.957060791484888	3.28822337171251e-20	2.45996691069813e-18	11.6018399390076	11.5605953454327	10.8040546963202	12.3477546821647	22.2425201735689	21.6760039354548	9.94952314070245	10.9986969934133	16.5753643870966	15.4643265616327
KLHL9	2624.71077875541	0.569544637731411	0.00296755786679935	0.0131617696922926	9.59415582262729	9.58425118432053	7.14742432754634	7.47372957303318	12.5190075661602	12.0206943521289	8.13238401609557	9.74184867191386	11.2031440818291	10.1252888220912
KLLN	26.9891811641996	1.43140907590591	0.000508665857263138	0.00297303158768397	0.0833621680109653	0.111360531402493	0.0822995968803958	0.071694904956493	0.260780291960389	0.196325677296525	0.0775493258404237	0.0503327970879201	0.207852732893303	0.313650774152736
KLRA1P	291.361644023639	1.20863404411673	4.73859548072836e-09	9.4659085912645e-08	2.0184555739521	2.13439956731481	1.56604933312539	2.20466297437517	4.85377215709521	4.09545321389399	2.10303375573953	2.80303871282597	4.44712680492571	4.08094435786032
KLRC4	6.86058702501099	3.35334424595511	0.000274116593811626	0.00175815808750165	0.0192101289107165	0.0540255209628474	0.0669362403380045	0.0206518796133433	0.313537474338808	0.464016866598827	0.0595686901256272	0.0386626029355306	0.174174400192918	0.190923685087808
KMT2A	6418.66917646233	0.398171326496886	0.00347485724208908	0.0150537275014427	7.22469401627092	7.89167200075933	7.21339842122927	7.86046828840113	8.72911707513576	10.6964248667211	9.02340611650126	9.87999355777423	11.4937890314122	10.5124496196229
KMT2C	3158.15112233182	0.632026965109045	4.87257789521543e-07	6.49886070672222e-06	3.0437630134212	3.50551362778454	3.46280519343186	3.65863809993634	4.90488489686799	5.43430840878601	3.93294192518204	4.42581560255477	5.05165671099205	4.80191976936301
KRCC1	119.231382721965	0.921379409700092	0.00731360674635892	0.0279458766567117	0.790359589469479	0.76836296480494	1.26930944640957	1.52102732390338	2.22959981752041	1.79125241201325	1.49268421394164	1.61032809687035	2.27809056760261	2.29974289157922
KRT75	2057.05105085055	1.0672903845498	4.96142339307058e-17	2.64094618617857e-15	16.4931205980701	14.9699252476517	14.849576548284	14.8449403702713	33.2153977050451	29.4434314659761	40.4084092665839	41.8643395069108	36.3866305065612	33.0532217706302
KRTCAP2	778.184217027541	0.492947092051276	0.00283466535795202	0.0126664897138617	24.182145749224	24.3345958992874	29.714632761383	29.9912107946842	34.3534661097609	39.9512584082968	27.8588352523177	27.5158988526331	30.9527332613404	27.763465097125
KYNU	30.6086255022384	1.19675095671462	0.0142558708525016	0.0478427025809953	0.292100788362355	0.311169832755228	0.113089232269174	0.199833083368835	0.457488641802537	0.566589016057515	0.283626626536584	0.356294891004691	0.381211894761859	0.427296362029403
LACTB2	199.738952847635	0.862805008976654	1.22990544708115e-06	1.50379625760741e-05	1.90552603891697	2.25981831406733	2.1865551168752	2.38173486559448	3.74710593929702	3.99275607967382	2.53914258626928	2.39115626964059	3.56468714470812	3.42261132829658
LAMA1	7887.8880594708	1.22595382488653	0.000973875611734137	0.00518390163236972	7.48560458695068	7.8912953142129	16.425979170513	17.1466416681596	25.030270924393	30.6468509226065	13.0495382348481	13.0909483669278	20.2105069773404	21.0938319016619
LAMA4	11.1877479757645	2.7075698981628	5.49601785769842e-05	0.000435014998359337	0.0117794367841581	0.00662556937406137	0.00820891119778884	0.0177289031278284	0.064085894054538	0.0796683907869956	0	0.00237074768892377	0.29370494865358	0.214075015664542
LAMB2P1	14.825887482997	1.93694864506691	0.00105267681348623	0.00553314820310677	0.0808742692184151	0.146215538263675	0.0536762419819988	0.149046877105762	0.377139048848235	0.418607568571333	0.083594342418681	0.0465053733301003	0.274976564400486	0.426498164410577
LAMP1	7215.68033635039	0.76583653322526	1.44973669986058e-12	4.87460131962662e-11	47.5854557029932	48.9118990542631	53.5329697372833	48.7725196195134	79.3465418524104	85.7316101257546	77.4424241286763	72.1674319814947	81.6521359392581	82.6494673195594
LAMTOR3	408.037673332874	0.656667501872001	7.92684699607383e-05	0.000596850928306943	1.73688290779286	1.88008812950709	1.49486766272613	1.79111628796099	2.50400208478183	2.80699848048681	2.05361667416274	2.38494060201566	2.68602969867602	2.61980943372291
LARP1	12777.1480981361	0.326046396381718	0.0055934294901773	0.0223826105354154	37.7353926948996	39.5307890763179	38.9152449159624	37.9811708498947	43.3870573891315	51.00039986904	39.6527739724019	39.9264919259895	43.2238797618406	41.3074403936505
LATS2	1526.44665082413	0.730714817634639	3.94256273826974e-06	4.2589830095386e-05	4.06840240499158	4.68071733487242	5.4574953478976	5.30035352391356	8.08813177534245	7.70634658102258	6.29289531652233	6.23333508745769	7.89871321040849	7.90883934297812
LCT	16.7943998288687	1.49216661857971	0.00543379192382972	0.0218529970111746	0.0397480482255182	0.0439156329024324	0.036273564865443	0.0244178299489505	0.0733701325521826	0.123442231878751	0.0410849085370361	0.0457128785146327	0.0933146491876059	0.0524037798762159
LDB3	7.37394064352677	1.96955188016815	0.0095080106828199	0.0346262174908235	0.0191364817365457	0.0115325142125876	0.00952566033333356	0.00881687361502034	0.0520559074095204	0.0429220938402718	0.0141286470471252	0.00550205421318392	0.0247866651401669	0.0232887830212044
LENG8	3457.585875638	0.674274149592327	9.65147502709808e-05	0.000707817807634803	4.42564239115484	4.25648587709435	4.55523427580233	3.45483492209774	6.99254501830547	6.03428709933791	5.46490359430103	4.0791173837549	6.12093262594743	7.18561333069114
LENG8-AS1	218.787612993181	0.729484467489067	5.30144404557039e-05	0.000422461070279985	1.13916925881307	1.06088679953502	1.03876240237543	1.10112488162624	1.57659202343161	1.93701031890963	0.893441310494085	0.920100599905205	1.4552935029572	1.34784049306063
LGALS8	1347.9881812022	0.84119646438114	9.46831651064259e-07	1.18988779315986e-05	3.04422077625129	3.22086062366332	3.57614139684087	3.97665410572064	5.37285086461168	6.70121053954201	2.52225920392801	2.88860073410503	4.51944704500581	4.02244186222264
LGR6	22.5855553565602	2.15339106156393	0.000111617483977403	0.000803233895785004	0.0587703284477305	0.110188315282467	0.0455068359221012	0.0368556620791972	0.319739314490564	0.21885279026837	0.106307200839581	0.0837831351526003	0.294182475930237	0.340725345695166
LHX4-AS1	381.607173037536	0.561771801484409	0.000667664392428547	0.00374397801724971	2.42881967096367	2.3775295879352	2.9067341582685	2.99339551249182	3.77802626211188	3.93818816279645	2.45502816842931	2.984281486956	3.87811724328681	3.78188829320447
LHX8	7.2304414609588	2.87984713237099	0.00054091055623531	0.00312621658773848	0.0291529020918151	0.0102485043854298	0.0253952702508864	0.0156704368611468	0.118954528285533	0.17604564685352	0.0075333530167051	0.0440051866608819	0.189982542810591	0.175914732855114
LIG4	696.308080985327	0.584050512256185	0.00162874489769668	0.00801435933031245	3.38860323529201	3.18239588496302	2.50501759678169	2.73659213565095	4.4753227742171	4.18646328531386	2.26736631603979	2.71809814577063	3.26996842235465	2.64382843996708
LIMCH1	519.046153104391	0.574172203834513	0.0113930782078682	0.0399869810646276	1.28779754635579	1.25367636669332	0.904021318060114	0.914996772780432	1.53983475716708	1.63589888283333	2.0499519653847	2.28871385034554	3.06110817014036	3.18612366806936
LIMS3-LOC440895	12.5381539016659	1.95164490729225	0.00224119068804978	0.010445255626502	0.0304782399627905	0.0116884558875169	0.0128726206680485	0.0297869820969576	0.086676819141637	0.0769659309969331	0.0486869575910214	0.0613409777379385	0.0816459420239107	0.051141332583581
LIN54	1005.19677120326	0.452255382406337	0.000504760640320942	0.00295264864602081	3.10503703140974	3.34051640269051	2.84491987380224	3.00853925509409	4.09197769407205	4.12714228031578	3.62018811414012	4.21281411384765	4.99878587428375	4.27156300286977
LINC00113	6.96974262145372	3.60816699940582	0.0014654584686755	0.00731028107576262	0.0680419833173471	0.143518177824969	0.0395145235583131	0	0.323908942955613	1.1093899436546	0.140660927319547	0.171177936661128	1.00249998278977	0.966069682450851
LINC00174	309.683974637441	1.27781325362353	9.04260835919537e-14	3.48625200614143e-12	0.967106670658857	1.06526994679727	1.06710650057839	1.00070120455542	2.16490160852986	2.68156438024689	0.808037252915681	0.883996295690504	1.78568130541365	1.75643871695867
LINC00176	106.207777510331	1.06656835234016	3.89659015471492e-05	0.000323254441966847	0.28128735260392	0.3490046648426	0.361300793092309	0.256149246008009	0.706657321039337	0.567535609921357	0.448093962081075	0.362984927801632	0.555081882775575	0.695383664501842
LINC00202-1	50.9497040871985	2.24275514874036	2.50101029002801e-11	7.16508947967538e-10	0.123114638322824	0.124646726818149	0.171593455894111	0.121766220571049	0.716690079464692	0.535285755501851	0.127255396953458	0.183358996463312	0.418595934165301	0.475455731009513
LINC00339	264.747486638372	0.522318073597857	0.0146267493630437	0.0487881493206649	3.86594156222811	3.84686620158511	2.98351734071413	3.67282073400184	4.34976772757066	5.72385531927844	3.69062654980063	4.44608791798101	5.83710115228659	4.59537353848235
LINC00412	28.9546987327112	2.05404140308367	1.76815900369536e-07	2.60914518309117e-06	0.349952648609081	0.347360393442418	0.286913769208629	0.420477992312319	1.53993001253394	1.3176793052423	0.340444923396964	0.51788244116877	0.83989872425592	0.847597857651451
LINC00467	66.2905567230541	0.816921551100587	0.00209062120936022	0.00989912794617513	1.62277437257388	1.35591228337363	1.36580543169895	1.66871546511616	2.43108739997443	2.75520727333509	1.84752004273537	2.55601630383286	2.85204835777639	2.07029497648174
LINC00470	796.427408923654	0.567106292334438	0.000434660122490654	0.00260480657751433	6.52304314854924	7.69597282820691	6.05184059602152	6.14885985639012	9.58623455678872	9.53062898228651	7.51534826937914	7.44475074464085	8.75426494427914	8.92267304210965
LINC00471	30.9592149567067	1.22702875543285	0.000964894822698469	0.00514075654101129	0.375451630255002	0.430181371286073	0.306869420083124	0.328883599209061	0.888926838323026	0.755746659483892	0.287466169717015	0.377819882664842	0.614637274939752	0.434354574855437
LINC00493	321.865083273832	0.3884415619264	0.012645012592242	0.0434717028024803	14.022457025364	11.9734609873758	12.7937104567989	12.3481449941766	16.6081394943803	16.1477869576392	9.17583833805054	10.3188286924195	13.4694869482524	12.2953966210787
LINC00526	70.7943522316119	0.73195872888682	0.0102771031366717	0.0367710976784245	0.969155416285827	1.20924504501222	0.808565181908391	0.851123099776866	1.48526174674024	1.61560298300014	0.81833210243026	1.05768566438027	1.56250174016863	1.39540110947572
LINC00552	66.8831198611111	1.88836302924854	7.81702676181193e-07	1.0023886063782e-05	0.0933531788182531	0.106961310703791	0.192759754953198	0.197001948584693	0.573724119064236	0.492743434445674	0.246593119092589	0.208760059295029	0.301731137029315	0.358360138606574
LINC00571	10.8748310383857	1.92727615338021	0.00456316236331584	0.0189128105573422	0.136867559532783	0.144344578081158	0.357678489637245	0.294279374759041	0.698087274919418	1.0331277644043	0.212206312616438	0.344327212324111	0.426576841931217	0.388652985492703
LINC00638	40.5770666014823	1.90753834826476	6.85284915730459e-07	8.90415555328537e-06	0.127436851995476	0.149331860961643	0.205575956558341	0.243557671563877	0.741465904367019	0.589990627522956	0.241492132169342	0.249356898996432	0.296885037977762	0.281456997238262
LINC00659	12.2796655126438	5.22845528668612	2.19422387600048e-07	3.15077672952343e-06	0	0	0.0293280599781247	0.0814374402883111	1.27072978268382	0.823399901522677	0.0782999212982748	0	0.372032571516885	0.179256555808869
LINC00662	474.491212239509	0.764235181269782	0.00806270964842603	0.0302635026194329	5.13688775271802	4.88890136065552	2.96803970809336	3.1583379654021	6.82128725254187	6.61342810551775	3.5936775190367	4.26838152506	5.54606617640132	5.03505532790181
LINC00680	186.176769374129	0.586427857037902	0.011175874140328	0.0393422030925951	1.37462936179519	1.04238502133888	1.57151988081411	1.57064339486478	1.89903036536685	2.18172225884399	1.31671575363679	1.47745149110439	1.96577292361454	1.65538399684877
LINC00698	5.15317933625443	5.6856095079529	7.26341232090011e-05	0.000552803722168203	0	0.0136609491698971	0	0	0.224630662814216	0.117331785341611	0.0100417337759459	0.0293287974312036	0.0770733585594821	0.0551738979405173
LINC00701	27.9619481229993	1.66294056211359	5.57280946219231e-05	0.000440260196821988	0.0680049032174466	0.0819656950193826	0.0601797939169658	0.0452578157412122	0.184989957611707	0.207286154103512	0.0602504026556752	0.0782101264832095	0.117445117804925	0.110347795881035
LINC00888	266.623362895871	0.832689234907542	0.0101083950464917	0.0362950504023104	1.98433389049728	1.87521257680739	3.53147752734798	3.56690465077664	4.48371722728914	5.02504441530363	1.35635518964684	1.77139968925447	3.22832407108023	2.49929337955418
LINC00893	215.253113943159	0.481953655081019	0.00317558526422698	0.0139667091289104	1.64545253914268	1.67403281629158	1.89353731351746	1.76894636708491	2.36177781606014	2.39938759841285	1.69295686917648	1.75502891760095	2.40628860836495	2.0347868369035
LINC00898	63.3318647472864	0.861775786875294	0.00280891450458527	0.0125641697528022	0.234285538734282	0.299496316926657	0.257274011449681	0.238130729419711	0.388182118767218	0.519610189636497	0.28619541126068	0.25290977729106	0.386221847978562	0.447554575946406
LINC00950	17.6396138293357	1.28553565965179	0.0115572151844018	0.0404261612733723	0.0543816957228444	0.0621319242036025	0.0473722257644753	0.0328855097293885	0.0970800492519015	0.135462845783818	0.0983687857784745	0.0889276724145359	0.107858618079428	0.212332722579474
LINC00959	13.4791154636551	1.3765034439855	0.0133382021932277	0.0453416524102796	0.0533942332583899	0.0844667074282481	0.0542640480763356	0.0932775273887582	0.190634540743625	0.169276688436502	0.103481363602737	0.0335818939762003	0.113464416449149	0.142143536204861
LINC00969	337.373331413213	0.97562603015989	1.07309586265041e-10	2.76821024949307e-09	0.704071660885112	0.6633644286736	0.806747849861027	0.7543648280891	1.40580419345386	1.40863673460257	1.06589932756707	1.03533515009912	1.47232955737546	1.5482808261832
LINC00998	616.00221947402	0.985217106102952	0.00962927952176247	0.0349522612060019	10.7246723589709	13.1900888588903	5.43820821826849	6.08788824548656	16.0498544095729	18.320884581338	9.72831941430533	12.9889879093721	12.4954291077177	11.9031442861691
LINC00999	168.009114000918	0.856389065493441	2.90527549913092e-05	0.000250798868295873	0.502264600250038	0.582196209911453	0.504534194575133	0.587389306923737	0.849310724321024	1.06975630330448	0.536696547927981	0.532753445818664	0.734629356686522	0.766124706482725
LINC01000	1525.79312166717	0.735844424932837	3.24631097407884e-07	4.47899397433791e-06	2.47872244672998	2.47918341154269	3.03432114958709	2.51162915893896	4.43451501268227	4.10971641170744	2.31072886712401	2.10805553942083	3.36835606086813	3.6697657811708
LINC01021	1877.96385243546	1.102350825369	1.78183867112676e-05	0.000162244007992674	30.1737281245563	33.8846504353598	21.0238701780619	20.6898223071718	54.9830200930926	56.1814504638296	26.623577941428	28.02835961382	56.5754987505482	55.4279423123636
LINC01061	79.5672464925279	0.86557741835691	0.0006482611480548	0.00365144282850944	0.244205474371848	0.249741885198119	0.330911580849069	0.29435572370434	0.51835419169781	0.478155030985856	0.309786861724308	0.186171105874701	0.410961930550663	0.41502096901967
LINC01087	432.815744305868	1.65088115698513	5.06376392471529e-18	3.09786307602634e-16	1.58191805582856	1.86796772821713	1.36624050055091	1.38449825011956	4.81351957191213	4.69063511928388	1.49886299856489	1.3878071078747	3.0972924339198	3.07389305046947
LINC01088	27.4100944015587	1.88312656350567	0.000195034495223516	0.00130707979130587	0.176330362306082	0.322336243766464	0.307204901254541	0.435997743290997	0.791441774987771	1.42684039058599	0.145808755520164	0.266163913384068	0.539578854010109	0.475677040478767
LINC01096	78.3693125961957	1.06076351471889	8.57465662874235e-05	0.000637724251337321	0.703295011098342	0.673635540970712	0.686635448818897	0.777993735828451	1.19224312712176	1.69879519737313	0.800697651454209	0.779530034258748	0.762423789523718	1.01301989572033
LINC01138	404.431664778349	0.68252421461648	0.00776908626753602	0.0293678461591326	4.16137077113081	4.28792029536704	2.66387969345166	3.01670419240836	5.3527508776984	5.7393368848789	4.10377569972677	3.75049858183966	5.55320953129702	5.03260159723519
LINC01152	62.4824188428201	1.73880519390895	1.02109619517965e-08	1.90176467895035e-07	0.229190045539594	0.168146506831266	0.260411533120465	0.187471506383843	0.6302296018571	0.752179381294912	0.211148641876268	0.190525157898065	0.389628814741229	0.360777615900175
LINC01158	109.41601872683	1.22130936871738	5.64105250262196e-06	5.84301611074052e-05	0.459583436843628	0.442173598979505	0.597007082526209	0.721610859976683	1.2666290008115	1.26348581803328	0.606302036448265	0.766747088881567	0.822424576216222	0.755553005379472
LINC01164	70.2192170721548	0.992264752763919	0.000462458823347088	0.0027434552217348	0.337153657288793	0.422242014901119	0.299815279811834	0.288833380124205	0.695020421840083	0.610790996033633	0.517294692816715	0.577836822123934	1.46277672975258	1.74275088164582
LINC01167	32.5598325976141	1.42935006685397	0.00132104178275822	0.00671016335717528	0.64932780106157	0.788557935113348	1.09698597851953	0.444220562808867	2.08748128610562	1.81796277006534	0.701674460287741	0.742526811344627	1.07042280383462	1.17335880636746
LINC01194	60.592710101708	0.980837659719555	0.00196672584224965	0.00940345796868293	1.6284278507392	1.12483905184185	2.05728820731166	1.50493953490055	3.14743387701649	2.96732837255762	2.15567379480261	1.86869247521731	2.20174305884894	2.393189928097
LINC01277	11.7063537673916	4.20821817029111	2.16479714912248e-06	2.5010859652714e-05	0.00936784005735414	0.0526912069926667	0	0.0201418226812218	0.369500810536258	0.32810357104329	0.0290487359099222	0.00942692998533168	0.212340834707079	0.159607098351312
LINC01297	131.909113020655	0.923986395156357	0.00104925391140449	0.00551844915374201	4.67491249016038	4.207190219876	3.18547851454709	3.21649414509357	8.22359827799595	5.98484411716696	4.15564512372907	5.99027014433297	6.95844998812687	7.2127573179626
LINC01301	2.98221950322134	4.0888505955186	0.00636304724431593	0.0249245285454874	0.00511535140004159	0	0.00594135160532455	0	0.04174501810422	0.0556021358656155	0.0105747956837077	0.0205904708890516	0.0231899344876655	0.0217885443445156
LINC01347	356.292740778911	0.967419305094662	1.67867608078745e-08	3.02419160198303e-07	0.688157523503769	0.719212986422465	0.810078651977936	0.8272817627897	1.30910482243496	1.59484315631004	0.668047685331673	0.851585678847075	1.07502947474315	1.05627650204329
LINC01372	32.2072708491796	1.12451789635432	0.00340403917316123	0.0147687185894922	1.27076372101848	1.1232026842948	0.801235430848401	0.858714407710827	2.22222079572108	2.10480318796111	0.86315962120936	0.803804176712619	2.63354530963793	1.75269831594138
LINC01376	14.561021561592	1.84626466956471	0.0021818065704692	0.0102291777448368	0.109760900743837	0.102895194363309	0.05311854885725	0.0786657538478504	0.39810196844387	0.209890851510275	0.0945437736216556	0.119657681327409	0.29026087831021	0.220773441028019
LINC01410	688.986832282016	1.35153272117688	6.08471767128587e-18	3.6489339412039e-16	3.71163461169893	3.63339937436893	3.19544351511397	3.07092085979324	8.2340004731238	8.74087135512573	2.58113046089011	3.11149962922524	6.5170406089563	5.75370552480321
LINC01436	154.318351716164	0.898614209027215	0.00104620888538577	0.00550572113250057	2.10693363968883	1.81054667757303	1.23717041454668	1.62329468960771	2.80200528610247	3.37870088236004	2.73434498635753	2.56782640324018	2.94506838724099	2.59259356934545
LINC01515	144.271938421059	0.702210132609488	0.000902386597647358	0.00486510081516181	3.8857083138637	4.24565802441463	3.62881830780879	3.41525516645521	5.49929645713153	6.53204538688987	4.91194587286271	4.46504664476077	7.4984772701611	6.63529097360499
LINC01518	773.076893157536	1.03665922717571	4.64189632503017e-11	1.26996228805445e-09	5.76702531237852	7.1403821805627	5.92942961545527	6.3070798321084	11.6917900909088	13.470178336993	6.50460200728856	6.99875708724319	10.5337417003754	10.0677630121699
LINC01535	244.131824986138	0.877856326945671	0.00165952076859598	0.00813779471803299	2.3510970525394	2.48256403574205	1.57042551888662	1.53689891337019	3.74831273670098	3.39077523232874	1.32635779727065	1.6206167785073	2.83054435869071	2.58001276257236
LINC01547	265.846843818118	1.16522775538848	1.28611443713996e-09	2.82192406824021e-08	1.82757341735856	1.51439593040388	2.008965397275	2.06998940519866	4.37220952774397	3.77397553304397	2.34443462293971	2.04435812025605	2.60759404078295	2.89599836158035
LINC01579	197.236927177174	0.871956224882587	0.00110852285947605	0.00578184258765793	3.93904663522773	2.94357232397574	5.15025913873427	4.81543423226683	6.79647898920284	8.26418726451567	3.95520056995747	4.05449640077453	6.55617073049404	6.51950661460014
LINC01590	47.1362573380536	1.38249211845801	0.00076068968770365	0.00420407515923796	0.457689335793195	0.611410773823443	0.239217577793331	0.393631718227113	1.1516498415594	1.00880483346826	0.437601742437641	0.39148987414052	0.72621110632426	0.698571312098286
LINC01606	912.45884680307	0.597771105192981	4.2292923309194e-06	4.51885394654147e-05	3.14966897109315	3.10117629609417	2.83754453886469	2.85804981370639	4.27531511400821	4.55788938655012	3.22285036885867	3.29070566840969	4.10836110970513	3.88708250759037
LINC01618	4.47349097505232	3.48714616661289	0.0101532116963712	0.0364188592993411	0.0245213199850687	0.103443638487323	0	0	0.266815934146184	0.384999964143621	0.126730271518987	0.09870397668273	0.16674743127135	0.348157162038684
LINS1	390.523457395272	0.478697487084785	0.00442993958848308	0.0184605263977018	2.61159867178556	2.79418617973453	3.03330597404324	3.43321055992522	4.24706812374011	3.83124244695579	2.75811888377851	3.22081645728538	3.87676714314747	3.24448657206543
LIPH	140.005667420119	2.02767096729557	7.23226196366532e-05	0.000550831140411785	0.338669758516496	0.26344538597243	0.820189900471501	0.999303885316309	2.26395854550867	2.54117692893055	1.47472236572935	1.63876927818572	1.69049138942294	1.59600646973044
LIPT1	178.443453439869	0.815071978829545	2.2763101038144e-06	2.60841187313307e-05	1.48337589781889	1.46508436045459	1.5895837560209	1.54724413959027	2.75014345990955	2.48468506596	1.40549457540592	1.61712703947483	2.15151537434937	1.7300255294053
LMBRD1	621.761155898578	0.514750998974883	3.89918788825516e-05	0.000323293136014907	5.12101419156113	5.2785836565017	4.79961071678401	5.1399915554818	7.32239511127709	6.87516983696133	5.93195408959856	6.45136119693741	7.35335942582234	6.29485647332836
LMBRD2	515.851039364059	1.32136260574306	1.4975329360297e-26	1.95444687406721e-24	2.31855633113068	2.28452681785435	2.26437629347323	2.30310884318196	5.46060817217319	5.73345375655853	3.13086803008136	3.14231290735337	4.51895669626261	4.23805249263981
LMF1	75.7046615377071	1.35692486613276	0.000174691951578923	0.00118700250477017	0.167855335690643	0.155567603269008	0.310163219370624	0.287084549472026	0.622646642812783	0.529851059313362	0.264194512964619	0.257210143389637	0.661512359217615	0.612057757728224
LOC100049716	300.288694745907	0.649249927677022	0.00169500986425643	0.00827543053008385	2.63058805477117	2.45531897152622	1.93949044715901	2.28700575468346	3.19420213378298	3.94140451546596	2.01762397715498	2.22516674551112	3.06779375532266	2.46831217069649
LOC100130950	62.1233379807069	0.850229904232087	0.00122090601201279	0.00627879247683988	0.588043390544711	0.667315231152207	0.551191016116654	0.643267805734136	1.09447803542343	1.05907553348714	0.735783635440617	0.705950490637651	0.947073301048994	0.966740564174775
LOC100133315	109.281066999016	1.11571533621387	1.8649465959241e-06	2.19202762332133e-05	1.56075739725044	1.24835838318007	1.46352908459513	1.16990824527701	2.96026385410541	2.81883724133353	1.98326258487336	2.23342522339226	2.85618036493062	2.70390876744437
LOC100133331	85.1767059041237	0.684910995389207	0.00830857250029769	0.0310211355971064	0.350448857675678	0.31092806260668	0.339197922798718	0.430572115842154	0.499351047359474	0.624799308135504	0.357923300431883	0.348461072841833	0.368811133382992	0.515342671232968
LOC100147773	91.3696753059892	0.859598431398935	0.00686595911034618	0.0265871062780636	1.01299206090157	0.653842168932755	0.559350442470541	0.651625958326188	1.32132606791688	1.24348739807313	0.617938456673483	0.835558815187992	0.988096969888098	0.954910610198974
LOC100287497	154.060682741014	1.26712691911219	5.69221175787571e-10	1.31443091693332e-08	0.475971775745017	0.460439433345168	0.384235904898029	0.391935993631455	1.0238701491127	0.990699294503899	0.43964197431101	0.553707628331764	0.910548540148852	0.934605189858246
LOC100287896	46.4645749618683	1.01348754056956	0.00909147472523841	0.0334061925305476	0.389109935316825	0.374903049268457	0.234339971563286	0.209156627159227	0.617443239684184	0.574375607224029	0.268131339223518	0.210284553395513	0.47366425404121	0.399001617432611
LOC100288069	216.227358171452	0.5577479139272	0.00187063052125885	0.00899771748677577	2.99067098081935	3.14490793362722	2.55233271205687	3.07533752141514	4.08536356060427	4.36575227252486	2.82245230529595	2.66932701930385	3.81684586389208	3.08310816090113
LOC100288152	517.83858287634	0.927380585855975	0.000634913386569631	0.00359003175801358	3.8336557315904	3.81436558559926	6.39420869708357	5.28354162945571	10.3195669263195	7.6160252916434	4.44886582589	3.56572965063364	6.54567150685705	8.15751192613243
LOC100288181	64.1511382913846	1.21520400130224	0.00785846659737539	0.0296294292700957	0.241498763449008	0.224922577069814	0.112926446284525	0.0944085925181406	0.379657621988488	0.386365064433309	0.256104844621744	0.265114991557924	0.476313665833695	0.458662147266338
LOC100288842	44.8540448746661	1.21881345716985	0.000123789044267284	0.000878742615207604	1.2231217584319	1.07495033133624	1.24304693320662	1.05193519210607	2.95288123345274	2.28968048341596	1.1694399909397	1.72317165467723	2.21796011497809	1.99709636584865
LOC100505715	214.598295409276	1.3070206537568	0.000400391946037382	0.00242923749904705	1.87138745536437	1.87636971391549	0.878878029230358	1.02341327288834	3.5855750602616	3.26247696329603	1.47177168361507	1.74399925756475	5.33922839550761	4.25123571443091
LOC100506083	41.7547795628548	1.43628316387368	1.58417213541083e-05	0.000146517211830989	0.3756879595537	0.357868576656686	0.464503835058022	0.364798395562958	0.906580143340853	1.15628839306911	0.438429878830811	0.536598029593332	0.87904197622857	0.636647144913566
LOC100506207	22.8203695264535	1.27247395482596	0.00634773338914203	0.0248756037774229	0.118100764628226	0.0961458364694466	0.158829646994503	0.0935527266166512	0.219811488285877	0.330312703921954	0.141347556671874	0.143865864200831	0.16202834718086	0.158855809708445
LOC100506258	41.7551722065449	1.09932392162456	0.00120321456343233	0.00620047890994857	0.134722824492316	0.156012351266795	0.174886239851774	0.115015224625901	0.328753229372661	0.277564390173541	0.163828241643571	0.227283512433632	0.269449616657638	0.360059045017468
LOC100506804	29.5815143082974	1.24896583651165	0.00333008195203446	0.0145157629670696	0.398599066495916	0.386551144591537	0.239463496660247	0.325080010937561	0.616921846193244	0.946208025274153	0.213106185183431	0.373450338917754	0.841193864925552	0.683026907330324
LOC100507373	51.8448029365569	0.940572059968666	0.00521638034429249	0.0211097162472439	0.38284516003013	0.312588258456322	0.222332497638115	0.265534385606963	0.545912147907773	0.566785271345377	0.338278080491727	0.21748551149048	0.41290252681688	0.543568961611764
LOC100507387	91.4185816559199	0.773042653134378	0.00688560807439468	0.0266573343578905	1.97258424024665	1.91832501321647	1.37038165672346	1.32787101017501	2.8334017329425	2.67181583580379	1.61970985077886	1.79951027189489	2.34009700858986	2.35573144903734
LOC100507424	187.247868511993	0.657579388303709	0.00165807122674658	0.00813295015146103	4.02479581136909	3.20136633226597	3.91919192382703	4.30501028893154	5.33597641618945	6.57940996525625	4.32825060962976	4.43883713155382	6.12807901066441	6.14737567831838
LOC100507639	140.199403155722	2.07476024456571	7.8157309566108e-13	2.73768118736632e-11	0.991355101328059	1.36956013336451	1.37364049115104	1.98193570127351	5.70097797243298	6.02850713085196	2.3190526934371	2.60778313809838	4.45478641508053	3.87690832370081
LOC100652768	55.4866498572759	0.780569219267891	0.0112310433070335	0.0395127300372649	0.974466217670302	0.664982939697041	0.715708396154269	0.739483380624407	1.40335744141357	1.21151670636092	0.85911714290508	0.807563564852754	1.21810070874469	1.34286792194052
LOC100653233	62.0295010000807	1.59487382209658	1.11134778629496e-08	2.05249860028626e-07	0.545376661694682	0.559193410093462	0.40909746378664	0.525234291963575	1.48355781356999	1.52318194374162	0.411045475946542	0.537383075091173	1.53237949028875	1.58093085829242
LOC100996351	29.0136490993472	1.68467142881209	5.41448455523774e-05	0.00042991348976446	0.115310476255789	0.129717162881041	0.187502292900249	0.190079223142388	0.418230237439145	0.557060352139342	0.246323426409953	0.162452955154726	0.426911293961426	0.52390221330323
LOC100996415	17.4918735171424	1.2578677256808	0.00930109711038586	0.0340557003299851	0.0910159953836535	0.0853228105063348	0.063427669537442	0.110893142539177	0.19806860189681	0.212519093157039	0.0815335463666402	0.0732720807164854	0.178798499313084	0.301526854597492
LOC100996419	20.9609281641988	1.68942371148959	0.000275827328226889	0.00176527486234274	0.219334240139856	0.205614559618	0.127375593370475	0.157197082279009	0.513775692742015	0.603380510606704	0.314876648647653	0.245241937964268	0.510975068781959	0.294113080357901
LOC100996437	74.7847758086306	0.797939936497378	0.00591106619476933	0.0234196256545178	1.2884442859927	1.3068543080302	1.93808438059233	1.61221687673455	2.32701272423968	2.88262231629262	1.3317789931404	1.10527403273517	1.91509293103114	1.58943644674319
LOC101926908	19.0733962041008	1.87998268999772	0.00216603338337085	0.0101741781342605	0.0517624844051827	0.0873443962604919	0.156314131521039	0.211459896249982	0.40833916518612	0.500125031595483	0.310319897146899	0.260444944281158	0.504519110431055	0.587944847391691
LOC101927021	272.385617589118	0.917815378590853	2.44547683541494e-05	0.000215111614394288	1.74554809468306	1.67505922223148	1.30137808980008	1.26794206292971	2.72707420617986	2.80614315197258	1.58482010734495	1.54292306256778	2.17882207002825	2.46998100418876
LOC101927040	100.306526533188	1.20949769842748	8.02820033923955e-05	0.000602543746411644	0.538681764053482	0.757479636691556	0.596337219555203	0.959152074506775	1.41955399146661	1.7891158354073	0.234899763894824	0.304919791990133	0.381571868222446	0.382413985725587
LOC101927045	188.513881751019	1.06819655768814	2.87101902559893e-09	5.9511157896503e-08	1.36482700374361	1.35053589643231	1.35036589203626	1.56688816665623	2.70428541194052	3.06268675125985	1.43685536106428	1.81429197593877	2.18656368937839	2.14115009298582
LOC101927415	113.739113574926	1.04965691037317	0.000472601073688537	0.00279379137965193	0.962165351313953	0.876725034485171	0.527474529502939	0.753026739891024	1.4657019525798	1.69193852981596	0.676277817661121	0.712620550134684	1.15153644894385	0.830586334929246
LOC101927460	6.83480177398657	6.87326622810992	4.37364975281944e-07	5.90040849884577e-06	0	0	0	0	0.30853088792222	0.338426672764893	0	0	0.33270439318288	0.0757815140126117
LOC101927630	24.153943753398	2.01269728159055	0.00039751226623519	0.00241426012368074	0.282328048425372	0.453716592339569	0.796369628636771	0.823832446476173	1.6457170598779	2.9713876452971	0.291823688579241	0.28410890120951	1.55417157095219	1.31708957159476
LOC101927843	176.707896499273	0.643463010180494	0.0010536560109635	0.00553664338120069	3.47795421973285	3.21382586240528	3.53172617917177	4.10219543142369	5.00075377131981	5.92865608106559	3.22516532015733	4.05987502308082	4.59494203585866	4.85339622853569
LOC101927989	10.4535082189417	1.91261015728777	0.00318851619654354	0.014006099941885	0.11914452550807	0.125653341988778	0.0518937602620453	0.0960648836149501	0.324102229113242	0.395712963595724	0.0769698474472042	0.0449610219601157	0.118153394282915	0.211453848623328
LOC101928020	113.820879699816	1.13653472065689	1.25009657346218e-07	1.90366910352896e-06	1.05204731922969	1.31679324245633	1.06079326667959	1.13100514240442	2.4215449379976	2.45742369610419	1.26667810425372	1.3960659737032	1.59851887907275	1.44446839160745
LOC101928504	67.0937422877964	1.04227392290719	0.00580743207003466	0.0231181982923499	0.773952666826292	0.501356834535224	0.373711015974914	0.43004265216312	0.94622041036232	1.15528882298557	0.260668713603395	0.525057007670815	0.719467717479821	0.703769982327854
LOC101928516	16.4338200190213	5.63472279294753	4.05994820135067e-10	9.65347197835324e-09	0.0266472341242824	0.0749412308722307	0	0.0286471513919022	1.30476581249513	1.67351254967063	0	0	0.453009650725976	0.41617531013802
LOC101928820	43.8207999603904	1.14190220308366	0.000804341630013258	0.00441623408513668	0.174469063130394	0.227809816461304	0.28225054297018	0.261248803553345	0.457648546955212	0.556885114698962	0.457283217406189	0.514168023939555	0.459026556258163	0.336182794773879
LOC101929099	21.4008022215575	1.56629423975613	0.000449028682278776	0.00267717391950973	0.186721605817946	0.165829162470305	0.114143386684433	0.147910264573625	0.427729182192449	0.462891357109833	0.39616134381233	0.375798795457153	0.467793648147684	0.404641535130186
LOC101929128	154.203687246055	0.861729519432122	0.000227695206316895	0.00149966550219378	3.45038702499579	3.5861428557218	3.48481520525488	4.16629223503968	5.33907852515976	7.67001007431575	4.85862176441207	6.66753668576836	8.38773100283877	8.02284965459745
LOC101929140	9.19146352078039	2.27465328689898	0.00854099166825594	0.0317275421047863	0.0835205604697055	0.0652468550930796	0.0215571164440979	0.00997654569556613	0.214574318721544	0.212950166368311	0.0575530915529225	0.186771970453786	0.231386293228697	0.329399084854403
LOC101929147	630.963961758826	0.402436260576384	0.012077975765881	0.0418901289407592	2.70992686820531	2.42449817404197	2.31815449930258	2.14566492245361	3.1125853841747	3.0919951579692	2.47343913168763	2.88124776483682	2.86601627327996	2.61616502243695
LOC101929567	51.2330240216578	0.894289102713807	0.0040049661405693	0.0169746207434906	0.112943995840267	0.0964256837549361	0.103071258644696	0.075887888883515	0.172819841042954	0.180252100141841	0.118827372360568	0.135981785276589	0.130290885176556	0.123133171653935
LOC101929577	10.8150591091114	1.7153205851421	0.00693342244791142	0.0268078168972662	0.0455028351282769	0.0355471380129909	0.0469781289723337	0.021741286762544	0.137532036389872	0.103805021092783	0.020903665886399	0.0101755234044732	0.0630307812382768	0.122032738673741
LOC101929645	434.282436540756	0.579441867721507	2.17258499792967e-05	0.000193424836172425	0.856310375293337	0.791047671076039	0.887542586659484	0.930898209026745	1.25347453392101	1.27767806335081	0.914879274286997	0.819205799798012	1.37306078583962	1.36028021695487
LOC101929660	310.429272815495	0.547882464833106	0.000280498072316629	0.00179061432469083	1.38529380313899	1.40009800805126	1.412888904036	1.43806891279393	2.17268221654498	1.85606746639531	1.34239301691554	1.37660648198622	1.88893363589503	1.91768820112342
LOC101930452	171.098639546886	0.827514753180908	0.000989342199038476	0.00524562750672853	0.792220813054526	0.696963694317426	0.514337175833321	0.668239853012974	1.02225982973425	1.29535574500661	0.986838342646367	0.944396634695057	1.1188760238464	1.11903805422999
LOC102467080	58.6203510698118	1.94997463854665	1.55560498068132e-09	3.37124282344701e-08	0.491653718066305	0.819377870537648	0.782540942541955	0.56770519321174	2.37763249181952	2.59508186721338	0.65876440424936	0.568051972037458	1.67164725660129	1.29269794076672
LOC102723566	331.032858795639	0.832436651199387	7.69498851157105e-07	9.90311227196269e-06	2.58513181970082	2.9520280768254	2.93203533346268	2.56465191110715	5.20334891720228	4.3898930966753	2.25064328525257	1.99036208747234	2.90036397790835	2.89444819214107
LOC102723769	303.978454645805	0.813402875661751	1.17323248192942e-05	0.000112526854105142	3.84959847064144	3.34237889690149	3.79602856316861	4.19406751660661	5.74546061672447	7.28600628909902	3.77878446269389	4.41986394138355	5.88558016651896	6.63955891031656
LOC102724467	52.9964689461156	2.69194943360326	2.89899400739413e-13	1.07531316665847e-11	0.395122547190957	0.719025447182198	0.647893935162119	0.374803343178277	3.22448969698111	3.42465016746107	0.456460297390291	0.421003989201501	1.47514589785293	2.01300204236369
LOC102724814	539.826680230849	1.24704268318307	3.27230534296109e-10	7.88710640733672e-09	2.86220856911695	2.69604830897986	2.1439399309001	2.13206313883109	5.53681091818522	5.87855747076253	2.47012725525559	2.2776741072356	4.10310873600846	4.19640425761301
LOC102724919	14.8233803605213	1.76891432328619	0.00269093709319014	0.0121505947321674	0.197346859363228	0.416255674429614	0.458426797296444	0.247517730568778	1.29734325175369	0.873926969417126	0.475963359232564	0.364084733178871	0.745543558021348	1.02738480620788
LOC103021296	15.8779902846044	6.05817623278336	7.39117795859968e-09	1.42478298088148e-07	0.0218736191768649	0	0	0	0.376843404740413	0.422682357991373	0.0376821707134165	0.022011592346118	0.123952333879623	0.0517607887120906
LOC105370203	11.1517683451873	1.45063158633599	0.0137342255927672	0.0464548513570675	0.246078215739731	0.230685660062219	0.25405656864486	0.205758604245825	0.520638914443991	0.726485302797672	0.282616280350624	0.302659394759123	0.371857001638869	0.232923549204408
LOC105370941	81.0540193625326	0.763845845558209	0.00592317911393829	0.0234570673878352	0.545791578465153	0.638023267851907	0.465895326823283	0.445367572746035	0.778118822335484	0.95302320664783	0.516569602505869	0.549234291498765	0.886869575899316	0.765586169596978
LOC105371267	44.3518366896084	1.3348422182125	0.00169015856383459	0.00826273688573855	0.768405156428661	1.40466354503403	1.9634630499148	1.36302405448065	2.8740935147724	3.85133999277026	1.82677316385257	1.73981713209888	3.78829320419597	2.78203083985092
LOC105371795	79.5230149920885	3.15935178364253	1.68355588270831e-25	2.01786197941754e-23	0.156682613928032	0.232562984769757	0.272974355128425	0.262020722594293	2.10739640955329	1.90283166623222	0.125962959328149	0.175189919551623	1.87441590832613	1.87855268720326
LOC105371814	14.1825478574805	2.18315038044902	0.000411292016187562	0.00248510083443369	0.12077913027876	0.101901795637241	0.224451060645594	0.311625110263131	0.788517008635267	0.904392765468499	0.274650943451853	0.583396675189795	0.876064191756251	0.445858175938699
LOC105372476	26.9026319394174	1.02343143394168	0.0118014478648252	0.0411334737745508	0.605884954716037	0.720905252272871	0.433058517010323	0.501044294932877	1.10933520332511	1.12577163974826	0.554001796096465	0.49245542876315	0.92437655527222	0.661726161574178
LOC105379511	1111.18326898927	0.900325152415001	0.00617222823315464	0.0243067700581027	41.2632179481112	45.6932811221976	22.1284190119939	25.0565184725045	60.5953219845725	62.0604518637175	34.8538955278269	36.4952599138281	62.9144390367736	61.7442561349121
LOC171391	141.936581717399	0.801834669977734	0.00222957958294263	0.0103978196590435	2.18512763585025	1.89481132561831	3.21476279098317	2.74064576033254	4.25992488117664	4.28848274666617	2.25862081456923	2.32718065963733	2.74480352009841	2.86978942850211
LOC202181	102.964083934715	1.68263823366871	6.90407930988014e-09	1.33968032335659e-07	0.54909904352984	0.500128448871329	0.38410827730538	0.355527492790576	1.23059160386857	1.57502623924704	0.554667835905502	0.602795584585325	1.25171466039937	1.12513134805284
LOC283140	134.219845839602	1.5012650468841	3.76736401297306e-14	1.50857242146755e-12	0.680914863972433	0.693036002631448	0.587500038877909	0.655330943045165	1.80815354426503	1.80921003381334	0.844579580333374	0.959293859958774	2.04320700524599	1.52842133972908
LOC283922	642.732031677496	0.529349580323419	5.88305642466175e-05	0.000460273406510281	5.06265246265747	4.76040153637243	5.64779703830791	5.39298388922357	7.2102342394058	7.49892911800593	4.62851550310613	4.78488507422066	6.60975686670821	6.30317730577579
LOC284023	87.0475615852634	1.15393482953688	2.89831756127069e-05	0.000250370881007447	0.388310883011078	0.516248621699636	0.606817887325603	0.607206155443407	1.06590323949478	1.22787132509573	0.496240610123773	0.504435956874503	0.648135708599074	0.651570958104475
LOC284241	3.35712839956484	3.08367308101631	0.013698476891798	0.0463784520285529	0.00802295212832805	0.0112816569427368	0.0186369130014006	0	0.0763853672856621	0.077517129109579	0.0165855818891635	0	0.0363712518854699	0.0113911006661622
LOC284412	72.6959775700207	0.832334407831368	0.00459184017984145	0.0189959220776301	0.425901015030766	0.588195944953867	0.609508154340601	0.5069225876422	0.775817982578961	1.06549675033341	0.42450315693621	0.428587489196598	0.724042387150084	0.647893148810895
LOC284930	297.951318704183	0.517541421244662	0.00122930370034372	0.00631092712597787	3.0251878158549	3.16282961731587	3.20566198722879	2.99881221810239	3.95431504826347	4.69753802404048	2.48733468998395	3.14310985583659	3.46199209992271	3.50031264227729
LOC339803	308.248661365081	0.435743660701393	0.0099339813359996	0.0358147774010593	2.34529047587811	2.36544630232946	2.54563885990235	2.06357074288379	2.93355187423655	3.22028432149212	2.54682195068043	2.80962376853347	3.68644141614268	3.27041443792876
LOC374443	724.109896899638	1.33582573531719	1.56952279753594e-19	1.1195717477646e-17	2.69947215789757	2.91880779882312	3.1171045270252	3.45994583612058	7.84227809970241	7.18523500810368	2.65481473820692	2.63210362636901	5.78027527226531	5.23933022019096
LOC440446	8.66261722160703	3.02244727346186	0.00010879743906576	0.000785514783047393	0.0336994321912002	0.0189548897744886	0.0156564161395509	0.0144914512523119	0.13750603789528	0.195360749582024	0.0139331428951688	0.013564799820103	0.0534705531027031	0.066985701233076
LOC440910	702.867858139767	1.07437342923505	4.30618282977049e-13	1.55791858886502e-11	6.38655593384548	6.87599798945663	6.44148084899645	5.77483082423212	13.9569550969235	12.2570895825668	6.19870624792035	6.33399708218569	9.29464309252606	9.51892512642832
LOC441666	450.126194765017	0.721333610372958	0.00162941224488929	0.00801435933031245	1.37563095772114	1.36610517141785	0.988497836596431	1.0588049084935	1.69994015512004	2.15917964023479	2.09688466611265	2.44543140188774	2.09595004081423	1.82014431779338
LOC442028	2598.57354641308	0.632575163600944	0.000167165118722182	0.00114513305861825	15.2787558383122	15.8010209562978	13.5923315955554	12.1665742373633	22.6741262523647	20.4247683680409	12.2456530969125	11.6848835423318	17.6316797619916	16.8284116684655
LOC642852	1807.98008696589	0.87782494598047	1.12826852479727e-05	0.000108806585322404	3.52310278783939	3.65959001342529	5.27393424686878	4.59263214665603	7.72245935400553	7.56042465418379	4.77573786549118	4.56435635314489	6.43207949664277	6.87089252589155
LOC644794	111.6768922284	1.48743859376438	5.44498999435755e-09	1.07671468810983e-07	0.65480255754435	0.725102859864993	0.684482986596894	0.703946530070984	1.52517218922324	2.25386925395882	0.541460612785621	0.634222900679815	1.31726387510457	1.20860728684209
LOC645513	126.081806027464	0.719944962038152	0.00667991843053553	0.0259923769495595	2.56858487022985	2.24845145259117	1.63985272766999	2.06644914482216	3.81749825626258	3.06109447415806	2.19782698936792	2.84155374857472	3.35451917318117	3.33294040445544
LOC650226	593.865288547619	0.938638788319095	3.16295262341338e-06	3.48300389199502e-05	5.55021764098753	6.18049367108509	5.19192868867692	6.64507366198171	9.22167566997531	12.8123212653294	5.93585738101271	5.96188006010543	8.98100464486052	8.54835480381495
LOC652276	242.849589650578	1.02355254388251	2.52919755539043e-06	2.85653408515538e-05	1.20861014434881	1.20998056971471	1.62501658194195	1.70888596759255	2.71593846599944	2.99077164481944	1.42578559711155	1.17657395049791	1.71222291715072	1.85589318731107
LOC653712	13.9515314310559	3.29683497240511	2.783895161775e-06	3.10636154878492e-05	0.0968858675497007	0.0681191351270684	0.093775409169185	0.017359550979332	0.527106478598575	0.799588484617398	0.18359818502488	0.162494997844984	0.549028000608112	0.504386381308578
LOC727924	64.0485875058188	1.50512197040424	4.71090391792378e-06	4.96717032494907e-05	0.334256243046467	0.313348021584515	0.200585600212887	0.221594668251173	0.689521162316761	0.793932858750592	0.36277332286507	0.358788955241724	0.675578954748282	0.703962901730905
LOC728323	131.703557751904	0.732890659155846	0.00121441537156017	0.00624906087369121	0.841152189503033	1.00156901876329	0.772127021981162	0.933452385080428	1.2732389368888	1.59757405212564	0.848408051347847	1.09903009501365	1.08401692905456	1.12686073233822
LOC728554	229.985514350098	0.592984318876843	0.00209696731214446	0.00991585267650921	0.878177321632755	0.814098855567139	0.691320323490925	0.709812751154909	1.11037609959846	1.17059916399111	0.810218233243098	0.877170589352143	1.02108590166007	0.905119692268128
LOC728613	198.114177889301	0.589207344631865	0.0138039243973461	0.0466317117940488	1.30795921192096	1.82948534341269	1.14941858667373	1.39868382176332	2.07077545163726	2.09787501364774	1.19458039866837	1.56691605064806	1.85100868776449	1.86688465809019
LOC729218	531.497893853331	0.636458618641142	3.71498060217649e-06	4.02795342952293e-05	1.55030630637874	1.6746157722815	1.80771687785207	1.58479976628948	2.45244551942532	2.5676075622603	2.04634853259174	1.8114152788985	2.13675356764946	2.19249786773751
LOC729224	8.31179632614834	1.93583478497095	0.0127384081875417	0.043724530266179	0.0513376519197838	0.0451185056277199	0.0223602703504925	0.0137976560699658	0.139650960492639	0.108504447999495	0.0464312708250629	0.0258307383183386	0.130912940101805	0.082001163110839
LOC729603	383.293809202505	0.884497835978473	6.96156626590541e-06	7.04513704991312e-05	1.73658092842197	1.98557162192168	2.32119745478734	2.20969175519224	3.25253821990561	4.17404734729563	2.06570747335679	1.98817897586838	2.81349232326957	2.81323440968185
LOC729652	16.6523291915091	1.55206282368915	0.00658604517314863	0.0256952014848773	0.0436936265420219	0.0691208871142312	0.0444054143418788	0.111560643793648	0.185714598770944	0.1978895460495	0.0451631898991683	0.04946538904987	0.0866603020567707	0.124073655295158
LOC730098	51.3092555058104	0.888771373641212	0.00265770066101892	0.01201900101296	0.49549364528137	0.57557582212503	0.562992426287023	0.45162104348406	1.01089786288331	0.871622740110231	0.512158760137517	0.498619091876716	0.830143606478393	1.08585064851666
LOC81691	216.148348951622	0.800296052870855	1.3397621168454e-06	1.62458835077076e-05	1.25924789624154	1.38880009566544	1.31919401087199	1.21439917017189	2.22487118217335	2.17689464064203	1.8184126459402	2.03123248552707	2.34363476159862	2.43644914788747
LONRF2	392.001016772249	1.00635636149911	3.70131387026117e-13	1.35297612199443e-11	0.465152448632807	0.470292315316609	0.42268497253119	0.461490535810534	0.89409564994028	0.891424696913951	0.598678466679487	0.666668666834284	1.09212056337181	1.05705189190651
LPAL2	71.8438892509635	0.861630145796616	0.00898293211161785	0.0330901695326354	0.334879689276503	0.420803098530763	0.645498643835081	0.551509187947699	0.83342655049399	0.894947958217145	0.360872299146352	0.301141808955883	0.573341470818895	0.505815860915514
LPL	40.8010321899248	1.66829121601566	1.30632436748729e-06	1.58622529502126e-05	0.104668799530608	0.167252747042709	0.132622003808205	0.143212820889541	0.388260977030175	0.453936542888887	0.103271473460388	0.153205852251603	0.485289761946642	0.358015575407326
LRCH1	914.587823253182	0.529100344302489	0.00455173793443036	0.0188787831136366	1.85284331706035	1.82379249385493	2.4287204413065	2.41636701590262	2.79610355734696	3.20211827486303	1.93112033068485	2.09093786091131	2.65489887510096	2.6400884246992
LRGUK	42.7106277607052	0.810795825924089	0.0124719540414648	0.0430531658026191	0.25794693997155	0.249872377340706	0.186417070626228	0.252656821713339	0.382025081273694	0.429223061682156	0.254772669964955	0.288415558875984	0.383295689684995	0.211603430123961
LRIT3	10.4898204058412	3.39500562012543	1.58767747799406e-05	0.00014668741208588	0.0248702561790526	0	0.017331705087519	0.0160420850567934	0.169132938166395	0.144176669264635	0.0205653811147999	0.0400434101832281	0.157845550174832	0.141244562947613
LRP5L	1135.45254517887	0.582345916463854	0.0042394462100995	0.0178056740824179	4.40101266482392	4.58343979546334	6.64982583351925	5.41680516201508	7.9812200571394	7.39938611965857	3.56732717974942	3.28456122107231	6.0137654333743	6.76142456890113
LRPPRC	8392.31018572784	0.417282248201846	0.000494331029224016	0.00290417419269688	24.3690425509145	26.5410839735825	22.363560712076	25.1295590597346	32.2913440107171	31.9101153355371	22.2265941270923	25.2464051826307	26.2206283922392	25.0662899733784
LRRC14	2144.09478672199	0.643621687682099	0.000642074880004577	0.00362703344366805	6.34147778489826	6.84129725446942	8.74101401001318	6.76803976363439	12.1680697254992	9.72314297486112	7.59579361660801	5.93249680317793	7.74111294431213	9.59527289312428
LRRC37A2	226.425836052951	0.774358289159581	7.03933647467878e-05	0.000539478335569227	0.235396774491125	0.282568264230802	0.246733521014034	0.254298133457237	0.371707679722847	0.477066126757091	0.252809137197895	0.285413436214833	0.387817112133256	0.360305099860027
LRRC37A3	92.3423784988527	1.46484543074527	1.54276403018754e-09	3.34753195170864e-08	0.213023211683193	0.222520957629153	0.180263934375616	0.242097281803945	0.538084114376832	0.617464028424577	0.323990763455556	0.248053135665582	0.57943166796852	0.492566904667839
LRRC37A4P	473.537724065636	0.63457554469285	0.00010882805978879	0.000785514783047393	0.421433445666733	0.415595390649881	0.467235028498655	0.462869247337572	0.590570713574907	0.748049418836207	0.464836753266045	0.480086536333781	0.736090265605767	0.698083346550398
LRRC37A8P	105.864360377681	0.846542620150385	0.000152583855649393	0.00105923653633258	0.141484124040833	0.128949803121199	0.139985019966134	0.119710483825729	0.215599254841246	0.249985336008915	0.253216544425849	0.259705409254187	0.305854752131832	0.355262044747248
LRRC39	32.2846014379688	1.42722644288874	0.000323623517550001	0.00202411173436758	0.283986119477643	0.244752822614832	0.148961225500403	0.236361080549014	0.573153807150352	0.630643272754664	0.312475431039261	0.304214684557474	0.425680085980226	0.377194113425569
LRRC4C	644.653244083436	0.890480734106804	0.000533644894664705	0.0030963417297976	3.40198974429139	3.47361945128264	2.16989912750507	2.54265543264148	4.66611438626474	5.83992152278418	3.90163478110424	3.8561879134798	5.48021473799171	5.29828760553359
LRRC66	94.8875785186279	1.32536203619798	0.000934120782827023	0.00500403589924881	0.620893139385803	0.414344491351424	0.317795672348558	0.248895380275098	0.908900840605926	1.06126738367798	0.429663499654662	0.529499638786487	0.876629832375928	0.694783172449747
LRRC69	139.423895734707	0.925291953725696	2.14490934284972e-05	0.000191444567941587	1.77865755937047	1.89477261729109	1.43984591965167	1.88317668673751	3.48216978303216	3.01067330527916	2.15882095935254	2.08818968659204	2.71833183309401	2.86973080274516
LRRC75A-AS1	8006.95011587954	0.497321211912762	0.0017368563469758	0.00844883268287317	66.9348015592905	65.9843189289577	53.4447564976555	55.7442256475401	83.2924952970813	83.8370941526252	51.4577171653385	59.5930279069221	79.4146336586031	70.4508724357884
LSM1	477.563629370497	0.520629462980877	0.0115568266766295	0.0404261612733723	8.92117724765995	8.72300435625453	6.5986871899102	6.71846022604763	11.0061285565777	10.7188295854326	8.23720567401265	9.59551857041819	9.78017010971295	7.91378322301212
LTB4R	1013.75021071458	1.10806343758552	5.91308175181779e-18	3.56789682826294e-16	3.38404300319483	3.62995370458944	3.30303784067918	3.3559393773759	6.75449301861317	7.63349928906579	2.89161722341428	2.9860249629966	4.36883683808575	4.23494001099656
LTB4R2	184.67334012794	0.7802213385113	0.00032687079769615	0.0020422470158186	1.96554098475188	1.75153509501088	2.54838281163767	1.97792053158358	3.65257758567346	3.2709619734705	2.2442631288356	1.42595610416582	2.4089659349759	2.66090269971463
LTV1	801.207984833663	0.364231375716146	0.00249536058737952	0.0114110881069844	7.7911874898402	7.39726783089161	7.72056545176203	7.77032743340119	9.12352895674461	10.1633454129753	7.4440880937935	7.40427377248963	7.46485907681462	7.60438204685037
LUC7L2	71.2993325010443	0.800082943777628	0.00169510351229199	0.00827543053008385	0.377915858319071	0.406864605700993	0.411506002210455	0.438019594369525	0.771017624872907	0.620451569091137	0.830081179571067	0.481316750158655	0.635774060989056	0.964149702956083
LURAP1L-AS1	294.871274250263	1.06375901848458	2.82131003548365e-06	3.14412786307314e-05	5.41986111606419	5.94830142668909	4.14550885076387	4.24308618089741	9.42649530900545	10.7423836963955	5.54359019067419	6.34721986497541	7.68360034071387	7.53432014421574
LVCAT5	717.232061099721	0.460221539708106	0.000479066168441661	0.00282674709369512	3.31846457252127	3.61244960971309	3.0794249163714	3.3579404196191	4.44870182302029	4.53105986401475	3.39873033838524	3.06910600838607	4.04084608447571	3.58598492626094
LYG1	49.7929146975641	1.84760027609346	2.20263748119145e-07	3.15771112946396e-06	0.684268672633846	0.68366841072985	0.355550884704498	0.600114416885514	2.13078800742576	1.95730751001687	0.744508342580229	0.924153369562015	1.59184845752073	1.68740171201415
LYRM9	65.3463100828498	1.44689828950323	7.98962178774774e-05	0.000600294866858539	0.385188378212449	0.660125474236115	0.838849845154195	0.54350280878438	1.40799002656041	1.80267889511344	0.609657321042656	0.545087879334151	1.800782184844	1.45269222337478
M6PR	6449.31784370633	0.720877915414237	0.000203503105029189	0.00135507226285309	37.634005062774	38.6373008687999	49.8516214764877	52.5579551467972	65.0206177883447	78.5615636707589	41.9158051800895	45.8553538080761	59.5497251303386	54.1139075922232
MAGEF1	963.211645490321	0.538371360856212	0.000702978641546848	0.00391955084981453	10.3549219011145	9.40416654553288	12.5809356552534	10.6193389239371	15.655250442848	14.8229388005915	10.9332510796094	10.45223472464	13.2612784698608	13.8593666179997
MAGEH1	171.333329048037	0.616065160687766	0.00153159733185207	0.00761004325716344	2.32473711380066	2.20190501653983	1.90267770733758	2.045987294883	3.35852303593552	2.99679649844475	2.16636836305524	2.52121968548238	2.6347408591345	2.34298007985749
MAGOHB	1074.5542183631	0.529700679417514	0.000151204581518494	0.00105088225677053	5.51236846912335	6.56538711891364	5.98631591594308	6.93944024528904	8.83204881332702	8.78125376092602	7.15639651745486	8.54259417242199	9.00881269915579	8.23351855769429
MAK16	946.491563371434	0.854381489676731	2.20034713599989e-08	3.85366960131035e-07	4.49914764003602	4.72739936313291	4.02061935621766	4.76174329090378	7.23879132136969	8.65673190006621	2.52115230642498	2.86107588818946	4.09285473581479	3.51974811501553
MAML1	1538.96471467161	0.543101956950728	1.41778226991235e-07	2.1332114272917e-06	4.95280961215105	5.2562310103291	5.00002682092897	4.92937235399278	7.20246839531864	7.12914119278379	4.61067004678114	4.87433885550306	5.35202049979484	5.19223207208968
MAML2	543.292634935871	1.05240216982436	4.05582636356584e-05	0.000333767420362758	0.902505957881054	1.0082130127765	1.35397395728007	1.60359187840017	2.34592403806605	2.57359375877622	1.54958454849651	1.65746268874851	3.39531083599245	3.20347674197596
MAN2A2	1248.69797208735	0.451382634450899	0.000385583902433148	0.00235154128659385	3.05961642831446	3.30383993687432	3.72440538273147	3.33745919976987	4.49016629917305	4.47157911372966	4.10252191416143	3.94141326093634	5.04893976173484	4.71552721617372
MANEA-AS1	35.7408766077733	0.928968718694988	0.0106424104489967	0.0378076222018019	0.273012825446342	0.238642532994829	0.197114668015227	0.269705341705383	0.531906289248065	0.383198034866713	0.266941370761641	0.386113941899206	0.652288896086724	0.513344477785763
MAP2	378.651203049297	1.06294346052823	0.00515649477073553	0.0209096159644624	0.774543782065162	0.830659286370803	0.364820044112711	0.422093076570243	1.08988459395084	1.35790780302502	1.73400606568516	2.00604296228354	3.23421408002636	2.99505779897997
MAP3K7	1266.89399536142	0.666552694031652	3.28937627554572e-08	5.57264621142693e-07	4.45071211952718	4.50221736451217	4.07139541514785	4.67347199425005	6.63540038590395	7.08373339216478	4.36860118281485	4.97527165532601	5.7715200509833	5.16801472665453
MAP4K4	9805.50731849001	0.474583709411517	0.00164445675681215	0.00807966636873207	20.593104472827	21.7392535904996	25.2956387442682	26.1283511430376	29.5522332902513	34.0022834145103	17.7999210434706	18.679635029089	19.0447228249952	17.8740526433907
MAP7	68.5408320025175	1.08552466223347	9.6984517054798e-05	0.000709622178566647	0.221291707700229	0.219652501439309	0.158750572192653	0.185422060405746	0.429344488409427	0.385172963818581	0.275826885955928	0.219412741887509	0.28399520674026	0.309572603244656
MARS	5173.64970459991	0.522951755101949	0.00252269591141156	0.0115118827410413	36.1554791792469	38.0618413319537	29.8615388982894	29.4541853789701	45.3662373162007	48.467365587663	29.5457433386603	33.1341292456508	39.2024450322377	35.0273336514499
MAT2A	6567.50760400168	0.534529196621963	0.00019303040047779	0.0012946336604561	41.5488886898834	45.8409600705277	36.4655692495275	40.0895441251084	56.0759930153012	59.9713551547184	36.3321185712599	40.4980347683023	45.0528797475726	41.7724545573963
MAT2B	994.083840779251	0.702438250559114	0.0115488211141175	0.0404128459204838	5.27367305132558	5.28268632810474	8.224614208434	9.5176999631002	10.9231552491453	11.5056994942701	7.48785935244358	9.41553520713867	9.28671585219466	9.07775155608409
MAX	1757.76077690206	0.764122563211491	5.26911292627724e-12	1.65483958374472e-10	9.52690826411005	9.83894215946636	10.8470945203124	10.3239541797875	16.3269365959065	17.2838567018875	9.13744870173335	10.5084878395625	11.5956449213717	11.4762207315286
MBD2	989.724886319911	0.349688463519987	0.0133032586615832	0.0452665342523049	3.43132411325548	3.52048819830472	3.37282620832726	3.62736960018105	3.88486211298618	4.79263016933198	3.89155213909284	4.52083035743893	4.03652509418755	3.54110767402721
MBD4	806.427946642536	0.433141677986616	0.00143627229207123	0.00717891674156115	4.94095112492951	4.93262274139095	5.41842073597868	5.68566460006828	6.45115920964943	7.37232744607094	4.82202502204965	5.13503869678283	5.98039783777097	5.15926053219262
MBD5	358.877400487108	0.398897921080638	0.0146317373863666	0.0487881493206649	1.2238282657641	1.20005625287686	1.14610509387253	1.08312517546577	1.37033665646305	1.62479948554259	1.6662334315991	1.78022777825224	1.94788125747665	1.8638271902151
MCCC1	794.641542241558	0.416823271483854	0.00162492704295616	0.00800156220509911	4.18131804132681	4.58126242269532	4.6066631608253	4.79969616930145	5.51584819482288	6.31718406779135	4.50090130295891	4.97848712173257	5.72591933394659	6.01118237902629
MCF2L2	150.541268398757	0.944245474025161	1.07904697573798e-05	0.000104517474796743	0.561872320248334	0.410046483461882	0.470863670313064	0.535226850062948	0.894808723892654	0.970649605007368	0.503579027050451	0.433008812928871	0.753678653298381	0.711919932357856
MCM9	368.134996690061	0.4253189913305	0.0101425374996141	0.0363879796794339	1.23544848576797	1.260120887192	1.0273647559931	1.11304459222095	1.51074702130303	1.5306291200018	1.21405002422947	1.28118066822122	1.52838248680755	1.41646214966537
MCPH1-AS1	16.9505311801271	1.81233888469427	0.0109411395068077	0.0386781574980827	0.0431437551528193	0.103134876416975	0.0250551916076429	0.023190881269582	0.134965792438841	0.192793842346773	0.0624327542846199	0.0390743053869254	0.107573346876168	0.110261002479144
MCTS1	732.234466680669	0.634805946893467	0.000167785911830848	0.00114893897417322	1.3993890493868	1.46451353994931	1.10366182422799	1.38706332330181	2.03720674954852	2.02509220093795	1.26518587949616	1.55047826974063	1.67929158700356	1.49650613588085
MDFI	278.536467231148	0.701246405765777	0.008342478166377	0.0311279379105033	1.97883198241	1.90840641829469	3.20347114859291	2.69212871533311	4.27536168348569	3.48969855666072	2.70606476531402	2.27326990305414	2.13355085501541	3.12036711480024
MDGA1	247.156536159716	1.47597355895916	9.37735299570289e-06	9.20956423808747e-05	0.276201408871898	0.247667011558884	0.532343636342577	0.449699489701039	1.03716943347015	1.00557305106514	0.287559764854792	0.31822529992249	0.648749287167426	0.73600040992197
MDH1B	39.7433570703195	2.2188906334729	9.14599428078987e-11	2.40153909438505e-09	0.128032487076622	0.128596999282291	0.141625241754829	0.131087170185927	0.539004230851484	0.66269987514251	0.144942330374075	0.190192503633609	0.435316866145639	0.328939458224373
MDM2	10476.5773235803	0.559093912233214	1.34624401800423e-05	0.00012677430974461	22.96890487578	25.3760121538053	25.7773216424361	29.2097564523509	36.3431033176662	37.9492560111321	26.6131961980214	30.3583357898516	35.9082456085763	35.5090436938656
MDM4	4872.87800493893	0.323211334108369	0.0108933350870639	0.0385555787261911	9.61493926609136	10.557499284348	9.03263501782956	9.28863628751568	11.3330246753168	12.1977725832638	8.20848707538013	9.35870565498532	11.8975789745355	10.9362117506842
MDN1	7590.93485875761	0.883005954230561	1.10250283544416e-12	3.77184416654186e-11	6.40804660439112	6.94982782495005	7.35408513281217	7.38368212502722	11.7332721009926	13.55699893595	5.55792978261769	5.9538709812328	8.2590118098508	7.82072882671762
MED1	4965.0518100151	0.609921702608723	0.000384780129938662	0.00234907869348208	11.4952204285134	12.3154848345882	9.78357877105312	11.1254524361799	14.6469356937237	18.697715678654	12.4494760727943	14.3374673326835	15.0341493680512	13.2053473449414
MED15P9	211.378570019026	1.27974769171731	2.27326841800808e-06	2.6075987146409e-05	1.49610787078382	2.06280332465446	1.87309608566556	1.30551391561189	4.65117607709435	3.33222270370174	1.3355505922008	1.25136202373135	2.99485050402559	3.4345751467972
MED26	254.219996869871	0.699993140114681	0.00112056948045494	0.00583603714931587	1.23176504975248	1.24394440729531	1.79483305750549	1.43857464924706	2.19318675517397	2.33290891975943	1.63778974827813	1.60012662199512	1.47851309309491	1.79657405895979
MED6	1515.77588776682	0.630930445986883	0.00281895037431288	0.0125994638876252	12.6129540375712	13.6639004343626	9.35924555665849	10.2473133734449	16.1478095217706	18.5964542777631	13.4735286260053	15.1743729304559	16.2842571746632	15.3106993728247
MEF2A	1550.36387366454	0.466457653248767	9.22498178601552e-05	0.000680632136046095	4.73837001175868	4.7939837738908	4.85623057730059	5.46562937875249	6.41638909371298	6.97523930099291	4.58662317319016	4.828236525737	6.08964016241198	5.85597785714039
MEIS1	400.546323495064	0.624187888295719	6.97325070262641e-06	7.04886426446212e-05	2.331352356405	2.08833010298388	2.35631277734338	2.42800142889549	3.43008617006932	3.50604784409812	3.30763219881466	3.56984295297094	5.63381087225707	5.38684828214515
METTL21B	303.855058679897	0.770165548934854	3.87132397575644e-06	4.18716127248943e-05	1.83919397582375	2.08310234067452	1.82267696695036	1.73429249305067	2.93694821033234	3.28262523598956	1.54419943379185	1.60444356745419	1.83545473555411	2.13895991663766
METTL5	702.413234018606	0.348852680013477	0.00904669782947362	0.0332694153741381	12.4927999350441	12.9492749660657	13.5413884417126	15.2049363010552	16.7554100321773	16.9347161466079	10.1292319240521	12.5016619394655	13.3710257863499	9.99119434745222
METTL6	460.306292040479	0.797181152672213	3.19267564794514e-08	5.44020814711272e-07	2.15113391407196	2.07755373185042	1.94806498159623	2.13276810218007	3.29232052804104	3.75954035674337	2.0457971618438	2.25821039069263	2.65387858558217	2.64522316856011
MFAP1	492.53594173052	0.364164122100174	0.00439903488986831	0.0183621406596991	4.74407309568617	4.55668475401621	4.64696926298083	4.85858742562214	5.66505324454077	6.15750157053295	4.43023965754479	4.73051845980363	4.92618899779758	4.6745035308584
MFAP3	1763.29993190716	1.30659307941859	3.21375296754732e-27	4.56638012380777e-25	4.69184221440459	4.38898238987064	4.71356673949209	5.30208615635409	11.3297327427619	11.7398176783934	8.162017385324	9.17106448443351	9.71284552665784	8.81103980375516
MFSD6	323.933625492154	1.03938182072956	0.000190799356240533	0.00128259971675007	1.37130766378038	1.23849874697569	0.776945979157826	0.914899362182781	2.04711146472617	2.28005719532505	0.787460746959858	0.968588069706133	2.00905105513332	1.92061983481286
MGA	6627.05302205575	0.426760968160421	0.000273843806621003	0.00175704808042806	9.93497712266996	10.7082692112987	10.6829394677567	11.3013012241054	13.0094011026713	14.9614882645767	9.987568287039	11.0896237453056	12.2782393481952	11.1757784040599
MGAM	125.196836133751	0.539606356295497	0.0121934142726496	0.0422406146421183	0.21192819927936	0.206493501072263	0.238396524607357	0.222451847876686	0.274630221836532	0.348662004264916	0.193183293609697	0.233416010383785	0.323403856803026	0.262990157306334
MGAM2	72.0391350212508	1.67857029193749	0.0143672758746411	0.0481249113375099	0.0860551303236163	0.100309580080409	0.0170968581351136	0.0231284261523417	0.172488095638965	0.183248937358033	0.104164491337564	0.107107983335626	0.139879389992331	0.130220597059019
MGP	16.4989793686303	2.53685092649749	0.000363080533326055	0.00222973716161442	0.0184449039101344	0.0389050828661581	0.11782809818423	0.109060727932234	0.41394083523675	0.389841381974389	0.00953263397768271	0.0371224992490143	0.418090645056979	0.327354186241752
MIATNB	287.511126298346	0.911927162637681	2.93962717082996e-05	0.000253267927251115	2.86164678945846	3.57686207754024	2.51126308578444	2.44974020241037	5.21841681428268	5.2481907670488	3.36323455054116	3.9142552489213	5.21321997818804	5.04113769492932
MICU1	1490.39153933777	0.325654037008583	0.0045283187699576	0.0188082150890813	10.5268632813836	11.3433390012644	10.7322273513668	11.7756183447954	12.9758081751046	14.171082047093	9.63364282253075	11.0964272993607	11.832395228663	11.3208626453006
MINOS1P1	105.416548867217	0.884231031830962	0.000121826000970465	0.000866203515374744	0.679644595852589	0.735997105912795	0.925491785777703	0.772644554719016	1.34941106396708	1.45297060559534	0.815549837583229	0.849018561921695	1.12442474305086	1.20898413634669
MIR1285-1	19.3362232048378	1.22036337057186	0.0149381351124056	0.0495379263213766	4.66897609334748	2.68584018501013	2.21845825120243	4.10677377453912	7.7936457907075	7.94573643947324	2.63236878269438	4.48486194052155	7.2157965794209	3.01321734288242
MIR3064	224.633036294807	0.794893766198503	0.00126706252089978	0.00647270935219869	71.3079985165797	66.8475779380298	47.9993694351072	49.3642504212278	98.0897237901167	101.779990520877	64.7722258044799	71.4859812337677	120.000883720794	103.545105055414
MIR3136	9.92870459498952	1.85753704957456	0.0100184331654264	0.0360602193956381	1.82841021837384	0.642765172481056	1.59273925727354	1.7199308970292	7.14972633791401	3.31236655541316	1.41742934452774	0.919971680106984	1.2951429757935	3.5695036215684
MIR4307HG	188.008599031006	0.516302362602575	0.00520114556622809	0.0210567517765103	4.16397071629663	4.08648514767153	4.05547842515027	4.9660987005984	5.75200135405014	6.31243577743883	4.43851962629491	5.15049838424859	5.48119633113189	5.20384834544511
MIR4697HG	146.662334304221	0.579823736710413	0.0016504266118082	0.00810447783540933	0.477088945974101	0.529136500828732	0.530712967745877	0.512895229537867	0.726584392097621	0.766913364742757	0.579954599881216	0.527431935711542	0.727291370274086	0.558120995963973
MIR4712	34.0901107815373	1.37990891677376	0.00353107497954993	0.0152634960904539	7.60908520756186	8.25404544661649	3.53510420516811	3.97322015585492	13.8976122771966	15.7539384952577	6.51671784008487	7.65708136186605	15.5227623976811	15.1248811991513
MIR5047	1129.57248361771	0.835980821230224	1.4841325016672e-05	0.000138427371873343	218.202475460734	216.586152519217	165.437826653003	171.334601873772	358.369152669599	315.420105239218	191.452181565362	220.65520747366	327.71261745098	289.305023524827
MIR570	124.355777950776	0.85301530848134	0.000179948097302681	0.00121989439260328	2.20540201597669	2.68122533933141	3.12185104421786	2.91425699121075	4.53067037661404	5.07739692997933	1.80466519638326	2.56608080102006	4.530330017389	3.75098963044383
MIR7161	69.903115068048	1.0309841636601	0.0022962240150051	0.0106662723227985	9.97463074487871	10.1465073655938	14.5432263134382	18.7086360840115	27.1334334935743	26.1440360266539	13.1618439134719	10.891807569838	17.3179117906102	21.6951648687534
MKNK1	82.9962375115661	0.672601090183995	0.0104577979093893	0.0372761362260832	0.410308820045589	0.508073741627932	0.62593394377222	0.513523069025159	0.791293476975532	0.80618746290286	0.455758799889374	0.517661838548691	1.11744455444965	1.00861524524377
MKRN3	324.017878103412	0.700834643081568	2.38556892084723e-05	0.000210472402686066	2.14213117548885	2.20833548569699	2.28959937462839	1.88611873316467	3.55704585705223	3.21408218102659	2.0987149564939	1.84486027483304	2.31607654307399	2.60293997964586
MKRN7P	45.5992627325085	2.06120422380115	5.28983491380562e-07	6.99711721819379e-06	0.45850213375633	0.214911074203709	0.240910346936047	0.246456723762911	1.12845330629554	1.26571753250325	0.203109899950699	0.296610587615632	0.85369987700191	0.805984896124335
MKX	110.770990859474	1.96685414779248	2.20377705405399e-11	6.41790874634334e-10	0.284134646466174	0.268657825595957	0.301565635686032	0.479255270565433	1.32595018001961	1.22472910148624	0.293691048577609	0.404241471967867	0.743986500851531	0.799881273213634
MMADHC	2927.51017626412	0.50345726176011	0.00987518433432487	0.0356246668276965	43.4695940852636	43.6811939344537	31.0512110595117	35.929269236956	51.7840849058283	55.0770260786653	32.3651298904971	38.1759438110366	39.3961403225502	33.7656480368594
MMP17	90.2876169411413	2.61377927328922	9.85893171463087e-07	1.23194693531972e-05	0.170062626076455	0.124767358241864	0.472338684757604	0.42924387854992	2.18232138920406	1.39308987440437	0.275137674508081	0.156254003734471	0.393860982933136	0.766364527024263
MOAP1	309.541848180031	1.22246417241045	0.00256345338257057	0.0116556687321691	1.21329807157399	1.37940544048789	0.71531587247432	0.503505983390605	2.08661761987222	2.27151326669314	0.78524530091959	0.953752187599534	1.47122240560142	1.39278709783543
MOCS2	939.470492295684	0.436241401154628	0.00174088406208733	0.0084614169075632	4.28939527072944	4.76055162187237	3.90242070115048	4.39588174256256	5.90949272370954	5.55639388576661	4.72013125182009	5.7280944181739	5.64423370804547	5.13969404508497
MON2	2617.29405754534	0.611126862394446	0.000579840870208059	0.00331695334162201	4.84403545732042	5.2838377170783	3.80921810389009	4.30928819404799	6.79134450977035	6.83494462211538	5.14535746372065	5.31122269738889	6.53112601598089	6.3073016075144
MORC3	761.86969908865	0.462082676833226	0.00114560958379451	0.00594011043463083	3.14811974060385	3.4083469014456	3.10679748937245	3.8267951992666	4.63444865116864	4.43828062578386	2.62446924571954	2.87809699784162	3.8430946140443	3.57579587171974
MORC4	820.00829693431	0.759958032867502	2.23490913081969e-09	4.73849145317835e-08	3.68722240634114	3.50452873384037	3.73716284779155	4.06892661577532	5.90045796778655	6.50291681340503	3.98425561971192	5.44640511086811	6.49760461940342	5.37380670414523
MORF4L1	5600.79780145618	0.391471286474513	0.0137233587282514	0.046427007955657	44.7615400600253	45.4913403823299	52.3921951423389	60.4596736911229	64.7781879358975	65.1795186383385	48.5543409139594	60.0086575904523	61.8760405524626	52.732280458358
MOSPD1	198.49688486767	0.786740580887194	4.25602855795904e-05	0.000347884123720789	1.48984347576631	1.45826854780831	1.18754012627523	1.51529465230161	2.27469874869209	2.48732810162734	1.43426893936236	2.00633725483389	2.03614939938759	1.5035226233637
MPHOSPH8	625.936517547332	0.423151293240265	0.00479992014927729	0.0196948749674235	2.63144558724492	2.57844014012375	2.96418179956039	3.20164134781705	3.55068211333389	3.89443659209542	2.68109350945934	3.03474256893773	3.60722202011538	3.0600958882356
MROH8	24.5212103755932	1.42960409164546	0.00510812025363246	0.020775616516332	0.107010638974403	0.0683979310416403	0.0508459735609835	0.141187856914578	0.264631901943077	0.223234526381187	0.115637482677707	0.171318055026744	0.496147541067958	0.37293189269617
MRPL10	1231.89460071534	0.503105839471709	0.000335707466074249	0.00209078467471269	10.9051936609148	11.0896313851353	12.4793833890285	12.31894965569	14.7595095635643	17.6040002103321	10.5980538766193	11.8278122519566	12.7136840734005	12.9218112064811
MRPL21	473.257845993782	0.394313112180432	0.0133007722139673	0.0452665342523049	13.4519672801023	13.9305072501324	11.9444212001741	12.8126707888301	15.3210300577707	18.1292502373495	12.0591450016803	12.8283498101237	13.4504890823169	10.5313858613013
MRPL3	1957.64232651358	0.517955590247078	3.74297422319791e-06	4.05331670796091e-05	20.8689082960228	21.6004078371185	20.1656681246867	21.0879573978318	27.7382314032588	30.806511172397	21.5290161156076	22.0581985237896	20.6394689462166	19.6289586907769
MRPL45P2	286.294604179813	0.722837623623264	2.73044870615826e-05	0.000237095287518079	3.77993688411669	4.04030400323873	3.41138279315752	3.30856129782593	6.0443556657636	5.67563094595149	2.81150562678891	3.13554817618125	4.28399155087682	3.88005694524744
MRPL58	479.40154926347	0.378287487953385	0.00980197188253724	0.0354403740197873	9.32946313925251	10.6677593126106	10.7669173791691	11.0730789180166	12.4736819791027	14.0425939913099	8.35338360375017	8.3518095692379	8.82251395110529	8.8307356262074
MRPS31	233.980431656755	0.420413066649564	0.0133473965329235	0.0453554058849718	3.594689992434	3.50088603652303	3.01538014726545	3.43509083456595	4.4546205465433	4.40576910768547	3.11008768799291	3.55037614410219	3.86279536081322	2.98666322440145
MRPS31P5	133.014631589226	0.468906112963914	0.0141368769633456	0.047505394048171	0.693697267400203	0.731593664128652	0.770165763889067	0.718342689795397	0.950450651824956	1.01645583138215	0.643216864212018	0.626212482682264	0.919162414065289	0.789385350255548
MSANTD2	287.853341029624	0.472036692536377	0.0110667924169943	0.039004964111827	1.24056380980899	1.54527791466336	1.50895680867176	1.7432223291377	2.00618169881956	2.07635470651652	1.53470706015716	1.6809016807215	1.99274601426199	1.82378075449201
MSH3	859.960561125354	0.537366166468107	0.000103538710178757	0.000751957351458992	3.51569117939287	3.77116845405964	3.28253998041647	3.94331549747741	4.90717522239285	5.37412293620552	4.04000830714845	4.28013359018967	5.00221670677732	4.48506594018603
MSL2	1498.27593489188	0.54156661516098	5.704408897765e-05	0.000448287155975565	6.09556318556297	6.34841777902044	5.4303393167798	5.64903808371963	8.06196650998693	8.66631752862815	5.79838549261423	6.23179558527816	6.60343715481931	6.52674247099814
MSRA	264.213828501998	0.640094101509029	0.0129263706796827	0.044214662202549	1.71315600622611	1.94389067624266	2.94527949239879	2.5620120566186	3.35673041033327	3.60546844851823	1.81460626361758	2.03120293405162	2.46064842441908	2.44440447815561
MSRB2	188.243340425215	0.617549775464789	0.00113076846142235	0.00587179767810209	1.68327826426493	1.77177456710405	1.96651848661714	2.20116422445388	2.7714565926094	2.93650165914734	1.99426282156637	2.2288104618826	3.24651079674884	2.79525407843316
MST1R	49.8464352473826	2.10301040203941	2.21262150254014e-09	4.69688894617527e-08	0.0707576611520637	0.116080413729214	0.127840593086564	0.139458249455132	0.491888559521316	0.455769951615835	0.085327058667271	0.0949386430628596	0.124744972839382	0.161856614052074
MSTO2P	129.791835935787	0.639831324089703	0.00279054606658611	0.0125010503806714	0.523148958650982	0.555940038295107	0.514857246470816	0.523773118795759	0.700683208782246	0.906745504192402	0.511849485523908	0.590747943778376	0.651749368463823	0.629373622424634
MTERF4	811.564363605565	0.502158118784156	0.0019383407469218	0.00928285556401609	2.51678489880327	2.60166855528046	2.07308919200683	2.18793930438409	3.25290344256025	3.2400728409101	1.95459006834679	2.22052688263918	2.71980024916634	2.32558569284002
MTF1	1406.56240318318	0.433421368993124	0.00817796717923646	0.0305918479258954	3.11055650829661	3.15077488838619	3.55309520212653	3.83443127552511	3.98437486206098	5.0071913395991	3.03488478195485	3.19318569673862	3.96886914719578	3.46708981971799
MTHFD1	8042.21219789731	0.351512795452178	0.000890996235954778	0.00481252687960982	44.7226063782203	46.8858791461377	45.2845149676036	47.4788149796581	53.9648188431588	60.9070046344982	43.2500939409569	48.5738643581313	50.539874533937	45.6449993270186
MTHFD1L	3567.86054393628	0.387924689949408	0.000294120598586885	0.00186205922619559	18.3607421330115	20.4145297894582	18.5640393236167	18.6485236268992	24.2007008772359	24.3667204390723	18.366396672724	20.214837706869	22.7008881827922	20.2887780697401
MTHFD2	5163.17561134148	1.00039067193192	2.95388268612044e-06	3.27942401050762e-05	41.2166472826138	43.3668176568433	29.0784698449367	32.3329803956056	74.1413901245248	68.7747320226452	27.7568023852247	32.1810925062544	46.4210983446334	40.785644006364
MTHFD2L	263.624138653059	1.31772948956231	0.00173629263393311	0.00844842306469688	2.23860112155721	2.16480735813081	0.932918613772238	0.97543729758209	3.67193324140134	4.04199923845786	1.66815526946715	1.76625351349701	3.75931863511924	3.61133532859099
MTHFR	1142.98151990524	0.784499121193443	0.000566726326486416	0.00324825996953942	2.13981633700231	2.16806606339494	3.29147517264935	3.13176308946173	4.53710647225884	4.47546549474826	1.85432525457482	1.85122147187903	3.41046756287758	3.39958138261776
MTMR14	1584.77362871938	0.460341964386382	0.00334203955568218	0.0145521526175219	10.9221261094207	10.5036738799657	13.7108041568704	13.0473422650902	15.940534932985	16.4142520889533	9.88102626628806	9.91110084281593	11.5304142727317	10.6556912071547
MTMR2	2051.00793950085	0.529061093626359	1.73452960247031e-05	0.000158674335752463	8.02618309094987	8.38860108791453	7.26101720227645	8.04123536273393	10.7619921673228	11.5932829439461	8.67512237867381	9.27228141220127	9.7156500879311	9.31333297858902
MTMR6	808.955700160589	0.833253391135583	1.93858197517357e-07	2.83451251623096e-06	2.33774304952744	2.59040772444867	2.59614056083966	3.10475036763789	4.91817831680128	4.32588975756796	3.27481614856285	3.54592995450745	4.07880648672634	3.71707163938701
MTO1	624.165565748868	0.627819014550429	3.10470858452043e-06	3.4210044121742e-05	3.81231444457828	3.8578275180652	3.4055716918106	3.53313336379608	5.52726658834402	5.50167199112468	3.41473680499566	3.98015320659302	4.64457621444226	4.27666256283164
MTPAP	1382.43175213426	0.447373693676381	0.00200955425957221	0.0095744555163339	4.99282872175696	5.16968479738722	4.3290199563796	4.42976203225198	6.16095558117139	6.44762169625308	4.56402160472848	5.19030997529397	5.42134866137844	5.19731737276957
MTRF1	168.459353345522	0.43790854391723	0.01216530570361	0.0421598192745683	1.51701698776072	1.46440473748789	1.44767836815663	1.55153182773143	1.90718471051352	2.05004103050065	1.28833504360019	1.65036317958475	1.74719195924893	1.46696836969032
MTX2	489.18551399819	0.36099559972847	0.00638218660562814	0.0249883879565694	5.92367010290054	6.07800685083531	5.99578289500022	6.23582986033452	7.1278569543154	8.06036936913982	6.4006906770163	6.90758886819022	6.7897382386762	7.24989177774925
MUC15	359.859218503932	1.78206025051907	0.00121147529793822	0.00623757547468542	1.88150526746282	2.01015711959877	0.592112088272977	0.536754040893969	3.96728431563137	4.51300177943453	1.63514181165597	1.92510583295972	3.81807538347424	3.2683458867727
MUC20	151.365512725996	1.0889847694709	1.53469373150613e-07	2.29344943642124e-06	0.112419087015771	0.115211329013545	0.147170060700404	0.133146791179656	0.24879245505465	0.27844979647632	0.193010366067587	0.181196859076223	0.294770997504774	0.288117169190104
MUT	845.452678890658	0.452776741148375	0.000158982553474064	0.00109761505080703	4.42693119972333	3.98014882794947	4.06546080620079	4.24134124596423	5.67175252087515	5.51279740018904	3.4425368383049	4.36252654018822	5.20443506248093	4.27278251318046
MYCBP2	4302.89871015377	0.344475915827185	0.00238503247961145	0.0109976150898388	5.33682824172339	5.82441500619789	5.46407620739865	6.06135209478732	6.69391899956319	7.3683346011031	4.9632196502462	5.44929381605067	6.49897142305194	6.22962881633445
MYCBPAP	23.3302340426099	1.62127787033166	9.80713313072428e-05	0.000716643965999646	0.0838260170649448	0.102157348729748	0.103852591069874	0.0841094733343434	0.296435430283964	0.263224113416062	0.138632587928732	0.118096678057621	0.285012654861139	0.301510650736071
MYCT1	415.908825775939	2.84125027502215	0.00285512438215563	0.0127417518969605	0.322209983438374	0.263611874878856	1.44252033948271	1.86422067276702	6.18323787711296	7.33009411243912	0.411767183885155	0.442148728937385	1.60677744404062	1.66355738943229
MYH3	125.92881115725	0.900136560365213	7.87674397820767e-05	0.000593839761027132	0.33953377895854	0.282314216200689	0.387501485414845	0.387234713862913	0.586294652247107	0.688202027784997	0.381471130317586	0.344646561842	0.565504296353424	0.624601329306332
MYL5	52.8363518150048	1.67548841610006	1.97935956795537e-07	2.88607541743041e-06	0.836062009838869	0.910178822151692	0.908415582438919	1.3337177563304	2.89788947538158	3.32238884453695	0.864181582215856	0.732776232339375	1.65057253072381	2.75702549012902
MYLK2	45.271766670582	0.780746996557575	0.0133567350291659	0.0453783869029838	0.268075182393157	0.296182877544976	0.296535772925973	0.267609318641647	0.546922511628597	0.400852092993072	0.329870774773732	0.31472715372081	0.376161826696629	0.444053082108988
MYO15B	635.508650125607	1.44788892145409	0.00119665678385851	0.00617933642286141	0.526961624257743	0.496627053077344	1.43680440755724	1.20333350360884	2.84405438987244	2.01988390315682	0.710794757255842	0.526524672262488	1.38506988430142	1.94741015191571
MYO16	206.474259579139	0.740816523204435	0.000641538868332539	0.00362516783872707	0.431221947435457	0.403137805547329	0.550388366415631	0.552736962920868	0.721864055752222	0.858468206147749	0.568177419337543	0.50070229001038	0.708920365697492	0.686263854168436
MYOM2	38.9281853624153	0.899586190042514	0.00564796389667385	0.0225751987058749	0.0569211722343482	0.0750384406109395	0.0619804739908882	0.0669300588546587	0.116129625298908	0.120305470581759	0.055158395965458	0.0572802163626779	0.0826555026259748	0.10102185464064
MYOZ2	91.6598758184159	2.53973850654832	4.11381499260835e-06	4.42228836819808e-05	0.123560259270161	0.154441843522595	0.446482163764012	0.450158491009679	1.30711040515011	2.01458720611286	0.127716005629377	0.103616371363609	0.637946436132091	0.711476655623988
MYRFL	20.1652841259384	1.33942870913616	0.00613608063168809	0.0241752246533346	0.125622675157331	0.0963530111214395	0.0663216218595646	0.0798027788774417	0.194161579240346	0.262061031129741	0.159358648279705	0.17238418733587	0.20709012604616	0.202682780911373
MYSM1	2351.99937232302	0.530684130191185	3.27925872696792e-05	0.000278578879028196	5.17276740011492	5.54732491353018	5.58688971191935	6.47137601049714	8.07813749539176	7.9824281561965	5.06446336989798	5.81507845841053	7.5895911911046	7.11954056530173
MYT1L	54.254231357371	2.29593165648126	7.19225637181601e-12	2.20383243504393e-10	0.0826633295799277	0.0489427050186917	0.0631653762799148	0.0514495148488122	0.304750518072001	0.2916256827005	0.0742009992437343	0.056915880636271	0.16025320042155	0.138986718195187
MZF1-AS1	76.6921040496473	1.25287224545608	7.63424037917151e-05	0.000578278939125636	0.342037598410302	0.346294053017422	0.603847423709233	0.44860383774065	0.958338639907924	1.06577872475592	0.332328982926497	0.316659476997684	0.682261042658983	0.563330579221916
N4BP2L2	1600.93229842313	0.799330795990086	5.80361299674448e-08	9.43301267432112e-07	5.53635624364626	5.55534493982539	4.57294611508269	5.29901279235573	8.46163511367251	9.36351613137896	5.39824907821278	6.15522687219195	7.75438669503854	7.97076963131591
N4BP2L2-IT2	354.13300703327	0.996873061894258	1.89246773461973e-09	4.04652779323604e-08	1.26137870586588	1.16368099631386	1.24064291021573	1.02291420396496	2.32056201866465	2.25430590928732	1.14553798968786	1.17395159179296	1.68575174076287	1.9410295767034
NAA10	1263.19865135013	0.464788620258853	0.00258249886428376	0.0117119813358599	23.4557392258249	18.9690466018246	22.9280372151703	21.1534358166183	31.3604781131152	27.0188969607248	18.3936180057321	19.2552212115415	22.0475501925776	21.7566150972129
NAA35	1116.24661217825	0.524763396230494	7.70380430428737e-05	0.000582796599558777	3.44506840147844	3.55903967400877	3.09425071026061	3.53881333635985	4.53621181436171	5.044600436331	3.22009220391578	3.57741056297321	4.26836086482831	4.01247316072812
NAB1	1315.26551819946	1.27467392423886	4.88722201609813e-24	5.09514584033331e-22	4.39665454098529	4.34516525798796	3.88173904241134	4.12642340982399	10.2830472227691	9.5243145343883	4.12373909128918	4.74041518724113	9.2804120600399	8.61499677893263
NAB2	1195.4060817842	0.519981565535163	0.00189633429035871	0.00910395473074391	7.38462581465502	7.24942379704196	9.57758589895732	9.06994596560576	12.0563697989452	11.237731978389	8.99238926467454	7.92088490269906	10.0685781263863	10.5688237071193
NACA	6923.82717866496	0.409251953746484	0.00166739606921665	0.00816505040120294	36.87718658208	38.2232515635337	32.3819984884708	36.8505254015555	44.4580620006087	49.1834497417881	32.4428340216124	38.4224409184751	41.7893449931641	35.0528195362254
NAPG	1127.30842070708	0.605558822973929	2.94800946490606e-06	3.27496713506809e-05	5.52804941393673	6.03922431909859	5.08304620033247	5.65920427360895	8.13233780009581	8.44408276259498	5.34693266062229	6.21965241388075	7.27134753020729	7.15385651796041
NARS	2870.82808161342	0.577715479225731	1.12317002664671e-06	1.3877372159529e-05	17.0494787102185	19.1376265520424	17.808558792509	20.3084214172894	26.5311487008779	27.6003578889818	15.5847988502297	17.6014400233728	21.0924833997755	19.6677090683297
NARS2	813.767843165345	0.423873976554204	0.000928119661597047	0.00497794225804516	5.83853699644485	6.08036970823782	6.91282981332737	6.20825507480943	8.3261479886611	8.07709867670716	6.22509759369211	6.40948907736307	6.37648399594717	6.79247850727412
NAT9	1842.78114080204	0.465658440899061	0.000114592732080303	0.000820068784127891	15.8040191246797	15.1521692697653	17.8860413583127	16.5374206557865	22.8318405120804	21.2711005592987	13.61296779008	14.3000415000233	18.1641552801467	16.9638972483868
NAV3	2413.42809334171	1.07152896915031	0.00178261155907433	0.00863564285381651	2.44926211066005	2.71700096061476	4.91826730553571	5.48266419442338	7.50158456820932	8.4140717711289	5.42520865238591	5.65605629624903	8.39958083405417	8.26613895866083
NBN	1602.53311102493	0.737239411401776	0.001044773185796	0.00549980841366587	4.80770481107761	4.88196748277313	6.75430684609672	7.56212026674942	10.0139072879568	9.493604355846	7.39169599966998	8.76845573299259	9.37503663968115	8.55666977377203
NBPF12	863.225245684141	0.429440116577188	0.000268818483524105	0.00172858133620847	2.18919266792003	2.48950573344963	2.33589808641637	2.38314963350195	3.12764178931567	3.04980943711589	2.27578260492892	2.27365908477137	2.81364300438244	2.80561094893899
NBPF4	22.4339366430875	2.076487042263	0.00874515704000805	0.032350786971165	0.149806719572646	0.160498386405834	0.0165711167223338	0.0460142719836316	0.320187128656517	0.448011162756962	0.117977312389664	0.186644914691573	0.291057341018658	0.313982311359176
NBPF6	33.1508475600387	2.53891538838454	9.34166460047208e-06	9.19501612266578e-05	0.136390186181577	0.157943197198315	0.0279553695021009	0.172501748705513	0.676556110244436	0.726723085402303	0.257076519282035	0.201838971220592	0.636496907995723	0.569555033308108
NBR2	322.381945572416	1.16822984056433	6.61398194622765e-11	1.77099920836755e-09	2.37532289548227	2.47961036050619	2.00135529075655	2.01690696364749	4.70919880157173	5.02764580373348	2.06404345381999	2.20394299516145	3.5681364476739	2.85806523037628
NCBP1	2387.15107387427	0.480367492028374	0.00413546991473976	0.0174438219841512	8.93338122679828	9.64040232949236	7.19308285018128	8.0400147291132	11.6682563126801	11.3894923621911	8.69611345257012	9.43654965923864	11.037218069028	9.64924045912926
NCR3LG1	434.194834187419	1.21164794704716	1.05720227791169e-11	3.19499947418972e-10	1.06146346898701	1.1233786797013	0.866248505483621	1.0300181586408	2.13138667920947	2.48297737403581	1.07406585868633	1.14967629813432	1.7000425786301	1.52691082527135
NDFIP2	657.396780620264	0.608584396359144	3.18156005843621e-07	4.40344907066674e-06	2.48161025986808	2.61179446562388	2.51314067554762	2.7707857145512	3.90138058295066	3.82505401044543	2.41069562204643	2.828690581605	3.3767757827305	2.86550172577269
NDUFAF1	258.194952594321	0.866310714661975	1.44833399302276e-06	1.73948170573061e-05	2.64675846602556	2.8094519324042	2.42821426917671	2.21432054086453	4.51039928422998	4.47772255324483	2.28868574116409	2.52872631655057	2.94134377032894	2.66124013506565
NDUFB3	678.403494790424	0.383437916275026	0.0119212412563969	0.0414444257491038	18.627955966783	17.1195016670564	14.8314898231865	17.6150193906633	21.8190956468417	21.6685750531264	15.3042339111975	16.7419493235387	17.2993859970815	14.6862433985314
NDUFS4	858.576492519976	0.597323082769423	0.010340756878986	0.0369636428181892	19.4559554474138	18.6335907702003	12.6487044712637	14.1080749995974	23.2013438916613	24.8019397213842	17.7265984042017	19.6523519118542	21.241408575478	17.1512083664683
NEB	309.856036417866	0.977358121769303	1.48571486429693e-06	1.78073538735017e-05	0.163991861871482	0.189626354340118	0.2054268559672	0.210539738368562	0.315217969411669	0.423127221251603	0.241653195355112	0.281635759521861	0.390920792374298	0.373310448318789
NEK11	309.698135099384	0.719464207280007	0.00330632538799115	0.0144479531277322	1.23060405712873	1.13791707005711	1.68514636970198	1.86347295992159	2.31853228405325	2.43467394007202	1.4155257327301	1.40219696448216	1.86684267131298	1.80161746045024
NEK9	1399.33311075323	0.49113973641992	0.00545205838861706	0.0219114545504206	4.4793157296016	4.8668104111924	3.63658662697108	3.83298885623651	5.70876333023976	5.84590768339848	3.71738787746003	4.49053898095259	5.25565740734024	4.60564549560825
NEPRO	1935.59478109123	0.437675180021268	0.00301956379825259	0.0133639021756876	8.05408151105893	8.26699959504857	6.73939006097116	7.50512557009257	9.62926963155309	10.59991201177	6.84254223186351	8.1232463561381	9.13636540491999	8.38346766644493
NEU3	765.316352943681	0.395603912995314	0.00132116219342988	0.00671016335717528	5.5855337265989	5.6375277245773	5.08598507371737	5.43285720343566	7.11171754021862	6.86339707660937	5.10284880109642	5.07239843927983	5.5363120480535	5.73827110581232
NF1P2	31.7717216175347	1.31789923612055	0.00091958678816072	0.00494120147014447	0.0996540351939778	0.124560704232354	0.0685900135637468	0.0872937420674981	0.205822529738491	0.254085260617097	0.118265843860182	0.0965684558621616	0.255167299330246	0.235817009442972
NFX1	2617.28317110499	0.690506344269331	5.81208640780977e-09	1.13781278243556e-07	7.84721776324531	8.16182502823466	8.19537247167501	8.3132265241884	11.7871536122674	13.8334947908023	8.16225999973804	9.37715586038312	10.6940907558117	10.1937435255085
NFYC	1662.7241024306	0.44493030662736	5.13855098767693e-05	0.000410594693205804	8.60165725546206	9.37668831936869	9.81554589511608	9.56570979865438	12.1375871407209	12.6859776254184	9.61083214742908	9.71763671777147	11.286094894833	10.943513435497
NFYC-AS1	195.429401292236	0.684553269262536	0.00371200269086334	0.0159477628408489	1.1877196484534	1.26048229927146	1.09970086368007	0.855255213050887	1.88976452163813	1.56978276730454	1.07710375709242	1.20084926880087	2.12709528331138	1.82952102653954
NGFR	114.047813938568	3.72907986872832	1.18331685312086e-27	1.752005011356e-25	0.198077773657166	0.117276452522859	0.133193984672583	0.112075697550775	2.19072850491232	1.47942687526129	0.231679240816085	0.136381766612351	0.697105026269201	0.658678738461665
NHLH1	22.044749238999	1.46722451529765	0.0012266540514314	0.00630099642337311	0.125395073593048	0.127347378838568	0.0728216073079345	0.142295404979472	0.31267981028239	0.319716506130149	0.194418796377194	0.0701033519425017	0.244756210665781	0.18792867836031
NHLRC3	461.048169861525	0.548612650223595	0.013224034957654	0.0450578750568375	2.54313134833328	3.00475536736079	1.98084060696372	2.16239241889539	3.30205364083249	3.62272616794906	2.89308735655719	3.44251642480101	3.93396945759312	3.5680427309472
NHSL1	446.185337774045	0.524291071545736	0.00108127051073736	0.00566822526887281	0.967374213787869	1.22906680580647	1.01518824978416	1.08157627327409	1.47673268046603	1.53395729015367	1.04931758676862	0.980347758193678	1.28211217057228	1.14080593272663
NIM1K	28.3006669110332	1.34819342775235	0.000446249703946767	0.00266343954398309	0.130640607969306	0.0918516338079799	0.139091122925262	0.128741610438478	0.318356218219231	0.295837318307893	0.11815517894842	0.0876431035704974	0.197415381226294	0.200942493949777
NIPAL2	41.0095582790907	1.67614856865686	2.05753967644936e-06	2.39602059215871e-05	0.104905843247224	0.0983438278805852	0.0771688106211387	0.120297806394241	0.271101056666431	0.354757186986188	0.144578905287255	0.165389181015702	0.360648287257051	0.268104234352975
NKD1	95.3239443186512	1.52759935016571	2.84292656056703e-10	6.91844241307052e-09	0.116583177932683	0.161060020272903	0.159164283281925	0.145122340816665	0.3950274802898	0.419936329019223	0.238894413390461	0.220229567524463	0.403342828533027	0.322340964949927
NKPD1	12.0995139663752	1.60520528105157	0.0143432805833001	0.0480902494000311	0.0152139958430936	0.0427870138284808	0.0265060085486103	0.049067491225558	0.113810914517124	0.0826854890086068	0.0668341978111012	0.0306199236391486	0.0948353038814439	0.0486023535570537
NKX3-2	164.55650260749	2.05475433545801	6.15715970551272e-10	1.41622711294293e-08	0.700033898868699	0.480998301762932	1.14569196016285	0.761124516298637	3.36491980492245	2.9110691347105	0.781135761040502	0.672429099515948	1.62282975280149	1.87489079112684
NLRP10	243.747581410728	1.45355527607368	3.39337331754853e-11	9.4601019749822e-10	0.736908152986931	1.03001527887187	0.743146905930849	0.792214280930071	1.99856857405272	2.40351548445388	1.87914642804223	2.5799057301416	0.845176965688607	1.03374238545422
NLRP14	21.1921998490099	1.55866533100299	0.00318164995272711	0.013979424069102	0.0746094674512997	0.118028028009862	0.054160633911996	0.0451175774341206	0.183928862791132	0.230903920224328	0.139777887231745	0.117312632501218	0.174402198257518	0.132414468638307
NMNAT2	166.029224722707	1.32717309898892	3.60865374623683e-11	1.0012735488968e-09	0.476211265028329	0.386997036198048	0.398668299782432	0.38895030024256	0.967352392640577	1.06064677559284	0.642453231092974	0.858853006476286	0.886673078380185	0.799064470736971
NMRAL2P	179.100507174496	2.45211263727095	0.000108053066532675	0.000780560467092744	1.11110108491901	1.20362674957671	0.277221929820926	0.256594360182038	3.26874156072764	4.3836097558134	2.9009530398391	2.63376933903204	2.77038616594941	2.89803064113234
NMRK1	178.615212182273	0.954200647543102	1.46953860134391e-06	1.7625459916323e-05	1.09754275670607	1.35041791103874	1.37787447743311	1.50092139458786	2.42578744293034	2.60235950969649	1.46812057052036	1.75415152404283	2.72560464729235	3.23119476768668
NOC3L	2188.94230824523	0.432625878243103	0.000402450907703678	0.00243901457289954	11.6396217509881	12.7708162748878	11.117703148924	12.9357885655061	15.5743964057399	16.3635840342017	9.84650659781043	12.0110048304002	11.6180110790768	10.8144473983038
NOL12	545.937785650396	0.552384827138982	4.07468944485513e-05	0.000334850528586299	3.81020731510245	3.43358818017961	3.69638888897532	3.40785100774549	5.22503576954475	5.06418858577604	3.51662223997975	3.32258786016103	3.81319278394186	3.81447851800383
NOL8	1535.10449430876	0.551593615753258	0.000236572170777644	0.00154950374607112	4.8547805454011	5.21108126926552	5.45655594851755	6.43596139945621	7.62787286967951	8.07440816572459	4.72557769423449	5.297094539044	6.16288918028184	5.74568511807458
NOM1	343.42980483856	0.4462414075877	0.00257658253072116	0.0116911685832542	1.07660175479615	0.985883523563588	1.09371415510984	1.19524664843972	1.46032000554313	1.43842937958455	1.16435861245392	1.19261755732809	1.36977833372058	1.17037982822769
NOP58	2021.00447960271	0.326849065975109	0.00193230216013219	0.00925896974690481	18.8926017627832	18.8530803775494	19.9548924780704	21.11805962194	23.4984636328893	24.7689065990768	19.35648735457	20.5675197272326	20.5902985196214	19.9040647803727
NOP9	2248.43657792467	0.410697662400673	0.000307406439353273	0.00193642976580812	6.70540628115943	7.20964900233509	7.75389644377467	7.27842911224788	9.04393647642142	9.74086812117281	5.40935885214278	5.57509232123082	6.66007397011055	6.18639499084454
NORAD	9211.88760348978	0.54972764368272	0.00758949623290888	0.0288017069475683	37.2788820618447	36.4780964674468	25.8132267462264	29.0935547566295	48.3894204640921	43.7699823903866	26.3724627678921	28.4989767180587	39.0055468476202	37.4572861788206
NOX3	5.35803893589152	3.24212775953576	0.0104017734986466	0.0370954849346457	0	0	0.0405197854100901	0.0187523916645622	0.0948997965382953	0.179068739908588	0.0270448847537094	0.0526598270902726	0.0691925699396525	0.173363189590495
NPAS3	42.2131738788713	2.31602140972373	1.55098434429041e-08	2.79987634857097e-07	0.0417075526082936	0.0502697360830772	0.0899642160692609	0.0800674476987907	0.356572029640213	0.280643356215654	0.0739034016531845	0.0959328757330812	0.151936893216416	0.173421131833005
NPAT	1350.80171677848	0.702492439759018	3.51832420533461e-05	0.000295382049412508	4.129795642813	4.48720088294486	3.32153905755513	3.76800176118457	6.23762717126074	6.254832378766	4.93858818898711	5.41634451506091	6.63702711136171	6.16889197781503
NPHP3	201.414576606611	0.445476570862027	0.00864242343335601	0.0320300501624526	0.680318992886968	0.696586932014483	0.74414383231639	0.752680286700759	1.01964539635538	0.893443072375243	0.624687738168119	0.73113718185605	1.04427200589915	0.801812780903354
NPIPB3	307.992641566056	0.574205125729611	0.0131631916889869	0.0448852863108691	1.41452830897556	1.25443167059546	1.88336903604063	1.77502248664533	2.02448526422212	2.57150270599949	1.28889276034054	1.2696982657158	1.82659202325623	1.66547528667142
NPTX2	2.99230501642294	4.88419069956742	0.0028023551255451	0.0125443838813463	0	0	0.00763199791542796	0	0.0446865057418622	0.0872960592377593	0.00679195778800615	0	0.0148943829136591	0.0186590679544506
NR3C2	454.937050751839	1.22052851901083	9.84723954736907e-19	6.40215917288176e-17	1.10020818328395	1.11355960196871	1.11286512024827	1.28676126404684	2.62284179957799	2.62832748038888	1.10284558528956	1.33831078591352	2.57948211394558	2.17147829674253
NRAS	5531.81017555328	1.0226830693888	3.10190884578365e-08	5.30607106348176e-07	21.7093951478406	22.8222043560881	16.1963058914309	18.9411954929873	40.583885205615	38.5748660146566	30.0642046715044	37.0106837642142	39.4014246629501	36.4435580797489
NRBP2	1153.66349327319	0.34560828121187	0.00898799367711822	0.0331018939375305	6.14823194300889	6.03971367953392	6.72390086128613	5.61100974120037	7.73712458835749	7.48908017195549	7.99326593831856	7.11699284034416	8.82951461112271	9.69474150415867
NRG1-IT1	27.5068657022169	1.35869683991131	0.00440600408790245	0.0183825209625274	0.82060791943683	0.79580449926226	0.49299072248943	0.36504655773681	1.38553702945911	1.7087605246179	0.877456260898127	0.996635986782566	1.18659765972699	1.56687301829886
NSD1	5835.27012790846	0.332386462789581	0.00242951295511995	0.0111647336349135	8.26711920928874	9.40020069959028	8.66182321098934	9.17815770997133	10.5554495151477	11.2738154750325	8.87535014182048	9.90866350470385	10.611901100168	10.0631629781501
NSL1	812.744366662952	0.394076110786359	0.0117976261867757	0.0411282896289672	1.28645670546174	1.28562758628926	1.12612207547169	1.10031714897258	1.64702832208396	1.43644458866745	1.16106977094485	1.44926854840454	1.62917622014036	1.6025210661375
NSUN2	4048.07061870104	0.328183970116846	0.00791033378411452	0.0297931105049837	21.6651970581957	22.5997149612556	24.8933998626424	26.4057921501703	28.6044366268672	29.945876168971	20.6014864102327	22.4615505490889	24.0269762733505	21.3852645797523
NSUN6	349.785260557995	0.738882927274588	0.000783771942796125	0.00431674831513752	2.58040617200074	2.90669915742211	2.10278766534207	2.00598054927553	3.71722872300411	4.10501458326495	2.25851095947125	2.47801710332319	3.64776767158896	3.23035658486756
NSUN7	232.558361558566	0.699049073574568	0.000132116736622141	0.000929795249866547	0.732017758009832	0.84498342899195	0.850220159194232	0.970971640803528	1.42162609406709	1.27115027055028	0.813103493244925	0.886894046664935	1.34970037755215	1.29786873252978
NT5C2	1762.01838245076	0.412342596380564	0.00502938971673299	0.0204885126980621	9.67520806131861	10.6116273976329	8.82947220974702	9.63127929920209	11.5677051653059	13.6164134504145	9.73469938342753	11.0052978913987	12.9092111753624	11.5955151602331
NT5DC3	1484.76665640305	0.403147211263704	0.012800364853538	0.0439200834185952	3.48681681130073	3.57913459641863	4.50621128929207	4.48705168989705	5.21977164099321	5.14234117512472	3.4738218479693	3.94399281267933	4.88441611541837	4.36118726372386
NT5E	11.1535256557093	2.78932784220541	0.000606351233265906	0.00345290962472915	0.00876450325916663	0.00616220298101307	0.0458088724437081	0.0188445863138471	0.137089148072097	0.132315527348731	0.0181185658592534	0.0264593624809531	0.0695327497328661	0.0622198271391649
NTPCR	734.399939985007	0.329084961952436	0.00439260715241707	0.0183527022571582	8.93001649118995	9.04238392120354	8.59429904357114	9.50552826299542	11.0825846395896	11.0511105306141	8.20603165303184	9.15255333630833	11.0692726279492	9.38024422985014
NTRK1	18.2144885597863	1.63979824073887	0.00230709902672049	0.0107071922922228	0.0748771422995237	0.0438709165676604	0.101462563816515	0.100620988525635	0.305526191305299	0.188400267852516	0.0773955119868142	0.094186810091457	0.0636465081559002	0.186045341016611
NUCB2	1426.16738698152	0.411790591750622	0.00648408647234487	0.0253535551611727	15.4259961347892	14.9010866770722	12.4757854734287	13.2844601118678	18.3294272087053	18.1509301498526	20.0033370585708	21.9905838136763	21.3090693518048	19.3260894813975
NUDCD1	1206.77154762613	0.833843346503901	0.000744676130465006	0.00412333398575203	5.75163118853108	6.33144165122263	3.86518252879758	4.24896486390745	8.74955433044641	8.86638245167122	6.18883959027878	7.11952605942666	7.64711808000363	7.64539310722728
NUP160	4355.88896176787	0.405858836373677	2.10299936057458e-05	0.000188085003725704	13.1447204252118	14.3303267592422	13.6144626947228	14.2939324878751	17.6805245568711	18.1493463596145	13.4935756634295	15.4737254284792	16.7016361180093	14.9031781959722
NUPL2	601.700941058753	0.444861465993935	0.000581880896796643	0.00332734962060824	6.48795645935491	6.70986748501509	5.96856213604899	6.62294401703637	8.81092064782638	8.33897957523047	7.48547828579204	7.6769256143819	8.27507712346722	7.08483356546844
NUPR1	269.049241557963	0.483324615676331	0.00485836464054795	0.0198791283329806	5.8055031687018	5.1125203521684	5.94832227003694	5.61078960863568	6.99225238825171	8.35718798684834	4.14193991575267	4.28815746944604	7.13351117983102	7.60440903111641
NXPH2	55.5812389687229	0.863177669992774	0.00256441634552131	0.0116569792548349	0.424783975538219	0.313348021584515	0.347789548756215	0.381801624351683	0.672472562149588	0.639183233739884	0.568632787824216	0.833904017065725	1.05756518617138	0.711872597255971
OARD1	297.552981437441	0.570595356908758	6.09204493304242e-05	0.000474726845091882	2.62922383311857	2.60618277139925	2.80346755148728	2.65047101761035	3.89263546477632	3.86255896923542	2.34341921128644	2.46363789382615	3.64418662840773	3.2923916382868
OCIAD1	2657.15111212721	0.459782452979432	0.00106417796149467	0.00559026580309319	22.0773477396958	24.1111359318719	19.4270477846864	21.7536910430061	28.3123084460979	30.393661900828	20.9155922703877	25.5552510573114	27.7764848774209	25.0505348498842
ODC1	4853.59649923873	0.375778049857062	0.00236821486691227	0.0109401095280879	37.5819763697435	38.9572970627998	33.9442698146663	34.5494463926573	45.4190751479109	46.5535081723662	28.8046903925069	31.9712930413417	30.0986098295296	27.0459779355201
OFD1	501.394300826942	0.472394706016505	0.00200516819636301	0.00955872793607141	2.45971048908488	2.44969110094674	2.49498217870048	2.75090037086889	3.09507543524566	3.78036114156595	2.46923999690241	2.63200584221286	3.40839374445316	3.21080013263286
OGFRL1	2311.25490539328	0.839726973867994	7.39688064282698e-13	2.5961282877683e-11	4.46479458220913	4.39479084424491	4.09487081836719	4.86258570491646	7.85617002488887	7.71926398185579	3.7834361790982	4.51117205118345	5.57530997440635	5.30549252186761
OGT	8598.14751643137	0.673670428158479	0.00133192945959125	0.00675900493909511	31.7679604846984	33.2622182999746	23.0398072057264	24.6955794239828	41.6204506249871	46.379476148063	23.565991015741	26.9288062083559	35.3592460182962	32.0381625674924
OLAH	526.349185301356	2.55910494286419	4.98334852243383e-09	9.92108673635724e-08	1.42888164966429	1.18915061626403	3.39824902601493	3.43798618784572	12.8638123059515	14.2401058375982	1.29608997315868	1.33029710776648	5.39807683040648	4.74754243947275
OLFM1	85.7166012473842	0.705583594765561	0.00905577786512968	0.0332958577223956	0.365326321842399	0.305626085903444	0.456543937558305	0.457373508137171	0.685580255173348	0.580845600897353	0.693088019308638	0.618922581675088	0.707541143196135	0.650010776223351
OR4M2	22.2906599989956	1.58579078533013	0.00219646405311737	0.0102814825058116	0.0863392509714122	0.0751572745497913	0.0286516748310278	0.075139311065522	0.206903880667614	0.183723283343373	0.0849934570058149	0.0455105916473589	0.121150828178469	0.17512241014907
ORC4	828.378447598662	0.504185175010956	0.0114321192706351	0.0401000416940714	2.28187621336263	2.6638365693447	1.76493340058725	2.1972027326203	3.12429840887765	3.04955128034593	2.33244553170406	2.7218823994755	3.00810249789071	2.87666153490124
ORC6	577.583468165019	0.4499345035092	0.00699598434915136	0.027013422802476	7.1963169812968	7.02850571236398	5.65814248301147	6.42996945059237	9.1123493431232	8.46155522854358	7.6568071231069	8.37954050772016	9.1020836520496	9.46725382585297
ORMDL1	983.646082507724	0.676349243419706	0.00334708565038707	0.0145610622405358	8.73375921336202	9.97199203429363	6.14905385117888	7.54476954057553	11.823418647355	13.4885577580768	8.98528079445818	11.3704199151994	11.5095593102734	11.6115200301982
ORMDL2	566.640318275941	0.534884132669637	0.00092981185513622	0.00498398389888806	8.4725020726221	8.68166632516017	7.7141591763451	6.99649764987699	11.0328838796322	11.52375800875	7.47284901054245	8.20319575327779	9.16308801014918	7.57053916522092
OSBPL8	2328.08734778703	0.603033853238939	3.98496785121707e-05	0.000329320584289839	5.42736592815761	5.76569832385261	4.59805908016782	5.78400384150565	7.87665322862619	8.13050599135109	6.380485260787	7.44558261444439	8.9301731392022	8.3466765626396
OTUD6B	888.622349359796	0.414568307191487	0.0122458031687571	0.0424054257135084	5.35639633999613	5.57792289731597	4.3121631782147	4.81632107589928	6.72819683153574	6.34388527752122	4.96306412141506	5.33278522770567	5.91199994325561	5.35963545526311
OTUD6B-AS1	564.78948420923	0.710900392383729	0.000554177901795544	0.00318254903902728	1.82658545767686	1.83880874941811	1.27085332953114	1.74690443547705	2.79089378355786	2.55700152755697	1.54167839053009	1.96940045292363	2.11720977480015	2.26081516804292
OXNAD1	387.561927801546	0.493562737364988	0.00513262773000873	0.0208512261874623	1.8525932538554	1.94787905718102	1.50621823007163	1.64309749033284	2.41094569308928	2.36966421737045	1.5580340504091	1.68632503762643	1.74651590330433	1.64993932161989
P2RX1	3.48397225103656	3.72367809554006	0.0068112190890002	0.0263867346370041	0.0124490220873917	0	0.00722961255047348	0	0.0592626697307057	0.0751759169350054	0.00643386224820554	0	0.0282181989139365	0.0441882431567952
PABPC1L	2709.6121566843	1.02689197380988	2.88110978980048e-15	1.28187559056805e-13	8.54735083283932	8.80997610784021	10.4315593954968	10.0052588922844	18.4816064639164	19.1064012600277	9.61978889637543	9.18222114316735	13.4372843061244	13.2964027535477
PACRG	13.3634802490003	1.94790730871003	0.000614357933417395	0.0034906070393038	0.0984917106582593	0.0830978178787663	0.0915165098101925	0.052941835030891	0.281317601285206	0.333066692312263	0.0407217270251065	0.0396451884244998	0.234413723132569	0.0978879446196056
PACRGL	500.100748523327	0.558807269515219	0.000126745787225242	0.000897201295749914	1.3503390629467	1.30964655205647	1.4071489403068	1.21018903432074	1.80916257315399	1.98751372813832	1.44793327492109	1.26233973350656	1.57617598226399	1.4441941595817
PAIP1	2190.49131713202	0.662577244988374	0.001000861460043	0.0052982270951777	15.4955381124289	15.7033679825728	11.0261876304401	12.7588533405855	20.1565517416095	22.4065755720609	12.6967157946515	14.9256205380557	17.7937778885087	16.119821920163
PAIP2	1447.06166776637	0.35071357514428	0.00220291398797951	0.0103034620531487	16.4128386008714	17.4751781268287	16.4624534169758	18.4163136451989	22.2943232955335	20.5340848571902	17.3413621369566	19.6104900716555	20.7506188652914	18.4660968604434
PALD1	1069.23375306547	0.534474046248929	0.00174601453610316	0.0084769992040787	4.1709482607914	3.8954186093238	5.30215891948579	4.20714360123136	6.46902356772521	5.96573963328845	3.58529895703811	3.23530421447998	4.23187754743188	4.85280334774917
PAN2	1300.34845307722	0.854320136666084	9.69718803753006e-05	0.000709622178566647	4.38626213017602	4.80722270353238	3.37154618478932	3.29978731512812	6.60645172385878	7.42186805290005	4.01715372643027	4.5590185362311	7.5493520934804	6.68713295289577
PAN3-AS1	46.943550583553	1.45170971028087	0.0021506862685256	0.0101274150564721	0.374277491072874	0.434768592248711	0.15120482223318	0.209930927771968	0.785727868143745	0.776312289458995	0.235483469378411	0.286572647956648	0.534844986078482	0.646927173935139
PANK3	3129.23711705771	0.601646408892649	4.47938992879548e-08	7.4175160860383e-07	16.1532512140082	16.5416670384739	16.6402926949754	18.7066152328283	25.9363777709718	24.4799242491363	25.6024483140001	28.8715470183442	26.3185900866649	24.6758213156366
PAPPA2	237.708394061552	2.09579240583153	6.64411915062824e-32	1.44521895450517e-29	0.340554768743899	0.312737206727625	0.306749782882312	0.31381195314217	1.22888761872104	1.43256087022937	0.306511036945311	0.31472715372081	0.469987946147597	0.483524467185342
PAQR4	655.593683808816	0.631804682705041	0.00215832629177072	0.0101411882016397	3.95730031151803	3.47341738211836	5.26350996943602	4.43956997849091	7.03186086379624	5.93569445393587	4.2157485016083	3.53907472857483	6.27177507203802	7.37671854768808
PAQR6	554.81376424164	0.808241132402114	1.37847773801367e-05	0.000129188293968419	4.21162866238549	4.18841855517968	4.33092349706964	3.21012816709808	7.06190904702441	6.58470868161508	5.57404089735535	5.12021738209543	6.58321174595834	7.16091101536006
PARD3B	433.298925359072	0.808749987879726	0.00200116854664225	0.00954224319980779	1.04685096916926	1.14390811892365	0.701670426405925	0.759657688659548	1.44757600092743	1.68049719908226	1.10911158399798	1.21366706782893	1.72529396070715	1.81146929568439
PARD6B	728.718854739826	0.954818518993358	3.40301613649481e-11	9.47199704721991e-10	2.65377004230175	2.84627282011329	2.36891923335333	2.50826139671381	5.09631442580031	4.73061927773091	3.35791008097981	3.96106116350289	3.23968158452007	3.10423413542799
PARD6G	1183.88843957942	0.707930192212321	0.000806694176828661	0.00442501391704364	4.46837418977785	4.60950141298034	6.69124966533776	6.27334508943247	8.75898637233052	8.79971558428815	7.32449404637028	8.04795256932401	12.6842938515037	13.2034562755411
PARGP1	351.066103291507	0.673719780207886	6.76504411944787e-05	0.000520722203322639	4.77684796692557	4.62231611950638	4.10394348680082	3.94416670980138	6.58082245863608	7.01819101657982	4.16125148037807	4.15035566318983	5.88824947392523	5.29643700352509
PARVA	1599.3644051663	0.915521738480802	3.29364347793933e-14	1.32793373999572e-12	2.84610431055967	2.84058121642849	3.2296857516454	3.31248664201653	5.58688130671048	5.67459791698663	2.82770570234151	3.05129040385065	4.1363173877676	3.77386551029659
PATJ	993.504726567152	0.508709797214368	0.00732444240415871	0.0279812122113773	2.43590940370019	2.51444837640255	1.90888975895249	1.96742666480155	2.89115176243555	3.24829267272672	2.19281519950694	2.51666994122399	2.74648287491411	2.67277764120774
PAX8-AS1	464.147850188968	0.944558465866599	7.300033247082e-08	1.16187250027405e-06	1.40810535915124	1.51350959570794	1.80574788332744	1.90778497497164	3.04332413958234	3.18692527707572	0.60212374016619	0.609498658006391	1.32042362855622	1.23241306601337
PAXBP1-AS1	32.7563174413758	1.16616001724621	0.00498967776602613	0.0203596879480348	0.180847066996144	0.120793556380538	0.110275885679857	0.0923494652149298	0.289019580707613	0.267559915774561	0.154216887852499	0.177438108729739	0.179342648943253	0.19899614407471
PAXIP1	220.267397453939	0.815718951111487	0.001909488614184	0.00915961881113747	1.30148623370104	1.05349765877552	0.741876663746217	0.980964281633805	1.69832798600187	1.81546599056791	1.03252396217754	1.15021243733203	1.55124075171818	1.2069104378765
PCAT1	39.1686167137196	1.51231437637798	0.00204967840299565	0.00973666319287689	0.214783128061987	0.151011094739525	0.405380925420525	0.279007722969023	0.511229777435967	0.951141400449964	0.185005838141171	0.180114937370343	0.29413789269527	0.292245778436186
PCAT7	121.381755397037	0.67512045876292	0.00514107760110681	0.0208759267697398	1.01237478534122	1.06120961362644	1.32550112685852	1.11803753421457	1.50213100767379	2.0118736460731	0.884704221752216	1.01876058535337	1.33512725558309	1.12377295224484
PCBD2	208.29975839528	0.534536928301709	0.0116335269923054	0.0406608038241281	1.82917910408384	1.70773354067927	1.38443736113726	1.65215036906746	2.06985714766758	2.58038647767152	1.68923244844055	1.96896377876556	1.81821081176998	1.54335522440319
PCDH1	132.50387463691	1.52459847894374	0.00613168646075059	0.0241665929915174	0.139695099498197	0.14286214341164	0.51256987317779	0.464190992384831	0.941375559641409	0.820570236612593	0.397082165439384	0.30990675564067	0.410201650605726	0.482329429703066
PCDH17	406.251506458992	0.475333924470705	0.000805860945024245	0.00442319750479196	0.88367072702841	0.976547211730489	0.953973057453014	1.06245914107193	1.33208079995445	1.2984361094668	0.848970978361792	0.889244694911751	1.16043775681035	1.14403687055024
PCDH19	15.9044610275793	1.62525340359609	0.00362437888557556	0.0156284707745854	0.0292365717575153	0.0231253152460896	0.012734077702679	0.0176798378977699	0.0521919698981369	0.0728272474514272	0.0283311523352716	0.0147104942698534	0.0559157668516011	0.0570769336782155
PCDH7	202.431797503464	2.81139955618822	4.45965440978168e-25	5.135598107578e-23	0.120186051031667	0.10341935105627	0.183346116957228	0.177417475736445	1.07107951588042	0.935915203018732	0.352289241395002	0.314093772449486	1.24217999477493	1.20977432059779
PCDHA12	217.267152463143	0.629313070148917	0.000321794315273402	0.00201338566789846	0.679870906282021	0.799744125496231	0.702335517737967	0.727382373708248	1.17366723067494	1.02243657793144	0.80747212567798	0.805860781391844	1.18543339478569	1.5036252879334
PCDHA13	57.6688892849425	0.804312206729912	0.00401112332201613	0.0169966286220784	0.198713957702541	0.1752333542207	0.176034850841682	0.202765327743477	0.288599012843127	0.353890664478773	0.226285243930841	0.176242449202434	0.286287036024634	0.315610749082564
PCDHGA10	63.5592075067144	0.903206321289724	0.00405929338318547	0.0171677124623967	0.21841275422273	0.2541733001446	0.218690434564386	0.206466446628709	0.507064407168971	0.313814195205493	0.206296750819522	0.288001273747053	0.495076199618908	0.326145451308186
PCDHGA12	22.0392766659435	1.50081583288016	0.00828026795419854	0.0309351232156539	0.0629667553907051	0.109375582019943	0.0344161401945665	0.0398191237921931	0.17632275722911	0.161041714931785	0.0918840547460329	0.0745458041225272	0.151122438230963	0.11043663812268
PCDHGA8	49.286375883198	1.11124239238039	0.00536009289098786	0.0215812332372749	0.172955544117652	0.154767059523133	0.076700973229084	0.135226278223197	0.320782739665741	0.250662418816766	0.10076274931111	0.1424016844759	0.23878698858694	0.236635096322323
PCDHGA9	68.2135372051862	0.953616445304786	0.000880029902616125	0.00476205370214788	0.29024249610433	0.252396864001237	0.190732914484985	0.225808041016504	0.462290900467559	0.447396553810625	0.236845520293839	0.219054953393083	0.398198200269671	0.357867972342333
PCDHGB4	84.511101770092	0.756761208283104	0.00428306721389732	0.0179546422178579	0.360964721426187	0.261976138228726	0.302041344020304	0.363019845953164	0.591258997983858	0.478140436803598	0.365081409661729	0.253878533537035	0.404700456969045	0.37473323454266
PCDHGB5	78.539240933776	0.73078347505661	0.0120611463447564	0.0418479870650821	0.322869333516208	0.367531961496283	0.258931737814629	0.247929421490072	0.5384714307029	0.43172177290799	0.365512181124446	0.336509692820504	0.444336244735362	0.28378036553925
PCDHGB7	39.0706857321461	1.01561329547458	0.00416403778625102	0.0175391302309244	0.14718223616491	0.141341032692169	0.125084234864414	0.0926215591519092	0.239246476593071	0.260133499116217	0.181816853093873	0.162560440856601	0.240042205984763	0.280327509547257
PCDHGB8P	24.1267475341749	1.89575770210241	0.00078882257212973	0.00433778554879953	0.243957927008065	0.0889381105358988	0.136428248595656	0.0777088465531983	0.540731633392557	0.469237938285848	0.177448073035151	0.118202139334577	0.50177764353601	0.307888807057828
PCF11-AS1	175.252146844774	1.10316333615779	1.29911511281202e-05	0.000122993601142584	1.47953204661437	1.60822202524028	1.2334808606482	1.24903913848848	2.37036884876915	3.46415524685267	1.14462471508198	1.24224281855587	2.18090470954391	2.3326352587161
PCK2	1050.40484919939	1.89575858792014	1.47915664417115e-48	8.98664169436255e-46	3.70298545205935	3.43860958265792	3.72039305557896	3.46089889189881	13.8814770369309	12.1769664687091	3.03313641466926	2.70416758548179	8.13773043240811	7.9054032573711
PCM1	3017.99419211168	0.513838175914331	0.000275371737756286	0.00176364036624064	6.73229965507658	7.10721531315298	5.84687221316226	6.24289443805423	8.68483815785192	9.40759604376307	7.45997613479484	8.02844395635362	8.55218904402752	8.14988523211024
PCMTD2	428.071220770698	0.654636905638396	0.000499245648807326	0.00292596570795288	1.3702429839172	1.19500425622914	0.987053163940793	1.25881543958699	1.78086688840804	1.92235559019514	1.06153132432567	1.08639512844932	1.66590781898804	1.57604367977719
PCSK1	6.94125931002196	2.95044738181459	0.00103331042569232	0.00544760514370825	0.00340015251366487	0.0095624038629644	0.0078983827368133	0.0146213574527427	0.0878678356466059	0.0451715065252796	0.0210870663500218	0.0171079990101909	0.0616570068201519	0.0482758452798251
PDCD5	815.366497471085	0.393788136677882	0.00432049849050445	0.0180900339601231	27.1832229444412	25.0678417267612	24.990711823148	28.2397357785637	31.4326509042442	36.2523164148323	25.4128184965082	32.611777554256	27.2957814977829	24.5986292620606
PDCD7	759.89718572888	0.539200401789405	3.05133878651736e-06	3.37486114749839e-05	4.86475121412654	4.77440829801169	5.21453112149816	5.13574795889985	6.90581592024342	7.28000309934019	3.1411149066034	3.37898402253254	4.84022777217977	4.14600104968753
PDCL3P4	13.3513726208581	2.57083840627162	2.75027836170843e-05	0.000238470248301874	0.108811798346765	0.178509554514067	0.0631910793831823	0.0974819139429427	0.665988043153032	0.613276412090738	0.112471504448794	0.12774784774629	0.575501985581484	0.823960144218508
PDE4B	90.5762227797624	1.7238378981971	0.00226280938876087	0.0105304909193285	0.076353433395344	0.0987768305149061	0.251858546250382	0.334902230029231	0.614792000393884	0.608619690025804	0.321999539291381	0.347294431577135	0.501903959438905	0.463984880552119
PDE4D	63.5621443073498	1.63396774168985	2.60496275753695e-08	4.5218560418762e-07	0.0685041093881351	0.0582452086591412	0.0925183661508314	0.0685073968943076	0.229684646081023	0.207799939401255	0.0658680303087066	0.0753488869363763	0.131805971477536	0.135715955389878
PDE8B	30.4470008863882	1.22288768609358	0.00163347387228993	0.00803018307920654	0.109293594456611	0.0910729944659807	0.108135567194548	0.104441113248951	0.187192219011846	0.283551814575559	0.0920492262795038	0.0692485494903418	0.256911195198274	0.21264939831241
PDGFB	177.220091429971	1.9148454553436	1.47935850151746e-07	2.22206457273966e-06	0.411463425050285	0.29904582972796	0.698062589417087	0.656061370621394	2.20083358543492	1.60249476377678	1.05608778704051	0.688547268876752	1.77101397374584	2.08080786841994
PDGFD	54.1406080823293	0.703090258077074	0.0133776448174973	0.0454319051733781	0.236621833294436	0.263673767223634	0.217790041189921	0.249581042479713	0.418992227165509	0.350482061022304	0.184588845267825	0.19318714093907	0.450332208262381	0.380330964390869
PDP1	2448.00584438612	0.474784862271183	0.00889249766628276	0.0328119196612012	8.90949554691093	9.27938076498257	11.0039249944339	12.8799445842988	14.4708014436826	14.0440770664822	9.37884852450546	10.4364711823457	14.467899053581	14.5373523504723
PDXDC1	1584.39729143857	0.337621283131932	0.00372242022340942	0.0159847238401781	2.10253863693954	2.00752214385622	1.89150390777376	1.95216481061172	2.40074376400962	2.51069668067623	2.23158080330846	2.42811720152825	2.3598889041079	2.20486017573893
PELI2	310.550149712796	0.443481552598144	0.00576752295295122	0.0229904947755764	1.10479825651126	0.990214955849941	0.963305256549746	1.14061027235268	1.4558355198934	1.3380890877819	0.773165901237307	0.95429295504075	1.30178240256547	1.1420178370461
PER2	676.012155176016	0.428056713731796	0.000618793406311487	0.00351014843071542	1.92268491742906	1.97633567697581	2.20050163548262	2.15462082505253	2.66478838171358	2.75664942911868	2.26337227562795	2.12433384883739	2.86720393884274	2.50236725031427
PEX1	595.254492625213	0.488115196859371	0.00124915820850689	0.00639051059108098	2.70411812350625	2.76955099901731	2.37198071866547	2.40375348240324	3.37601138319078	3.64607792447788	2.91187545217223	2.98110814067722	3.78286134464728	3.55282678780431
PEX10	285.561162877152	0.819734505149572	2.02258926133651e-07	2.93542011494959e-06	2.19184421669815	2.35690893766559	2.57572201971816	2.34710503732901	4.30224612811797	3.8617658297922	2.68313770810797	1.90293081372177	2.68870183055761	2.96556376098919
PEX12	179.750024490684	0.63562144564943	0.00488983720695188	0.0199847000114324	1.40861868109531	1.33607952550386	0.980101570539925	1.15003951892299	1.90685631057688	1.79754219332149	1.07139273600532	1.42419022486931	1.46844015369505	1.30187161530723
PEX7	82.9227530688382	0.939574088492913	0.000692262253015714	0.00386952622766782	0.926234123781484	0.76116928320125	1.11771175949021	0.892294976654248	1.48884461498896	1.97579759445697	0.857917761161529	0.702083650607961	1.49963923512931	1.05889581118297
PFDN5	2046.67428384004	0.423379042854037	9.41940927895391e-06	9.24571432233365e-05	56.5385366145265	59.4632524681312	57.1210006307666	57.4112647725541	75.101947196372	75.88833986875	49.2268266833516	53.5836702777429	66.3391809944086	53.4548260368437
PFDN6	328.311918519903	0.381268422642261	0.00880701219252903	0.0325281225746544	1.77053966303104	1.67574931052019	1.83045504819541	1.74654608183219	2.12367101309319	2.34396252700247	1.44798239179042	1.59570531253481	1.56562112959222	1.58841361703924
PGBD4	176.885337031863	0.708142115676474	0.00229878764607432	0.0106753662456994	1.57658969973025	1.53564863037105	1.15229669303181	1.16577098517978	2.14435465624873	2.19204930802579	1.21624976974361	1.16861803799612	1.86527407695816	1.52870733185061
PGM5	784.767833381863	0.924496478104699	0.00262702274111363	0.0118955316565616	2.65963026222713	3.01144533625861	5.05544410749347	4.93764292445086	6.34138465175602	8.13355676196644	1.35798054038338	1.80039394856168	2.07610875820127	1.81984606448501
PHACTR3	23.2264124828757	2.00294220896743	0.000156044909898524	0.00107944847565846	0.0685856748087849	0.0519310127515029	0.0551495984317859	0.119107377894298	0.36596383509685	0.216641908477748	0.125425088491801	0.10087289360155	0.346802416246805	0.344571524501262
PHF10	1300.11823870946	0.664596837648518	3.03796616654116e-06	3.36218127438999e-05	12.8507839526293	12.8710556146371	14.5545712882235	15.9001450461933	20.7540693115633	22.701491287727	12.500998193967	14.2185939823827	20.8080627721209	17.5649138163338
PHF20L1	3144.05530614285	0.543957942345299	2.96738282034564e-07	4.13953427645842e-06	6.84912940488219	7.00659569454917	6.77922912829924	7.63928623046297	9.76687991861185	10.3606403531785	7.08391330235465	7.72587334885378	9.92382118597077	8.79154727972796
PHGDH	2453.13211332214	0.826662816463512	3.76229986599123e-05	0.000313863453309183	24.8516337261876	22.6170403271721	18.342190801505	17.5670729962006	37.6037500240919	34.7691637784336	20.4658507938909	19.7200381106803	35.9264305723981	35.7871524381761
PHKG1	52.8909340657726	1.50855306223696	1.33527828011793e-06	1.62026639238277e-05	0.376401160184102	0.326580148282154	0.306956487587758	0.258287658776045	0.806051416509232	0.957550709078333	0.389060794926528	0.338480146454456	0.698888473730075	0.773202940815111
PIBF1	461.920545732705	0.672519847520205	3.10600604664623e-05	0.000265912150320019	2.47390422094141	2.80231574716122	2.37452710986396	3.04742930266154	4.14370374052821	4.17743369629042	2.50975603823865	3.00239392356148	3.65402561124289	3.42304587580128
PICK1	509.490922339432	0.621754516536878	4.85729576240777e-05	0.000390957944439755	4.07912769040244	4.13443334324471	4.812858226895	3.86425020621941	6.37208919302673	6.3215622706843	4.107783456094	3.45458327996675	4.38505952529194	4.58740836977115
PIGG	1112.33185949716	0.609644484895907	3.61872427700397e-07	4.94250411135914e-06	2.96703424518453	3.06423470960718	3.46213419762164	3.13344321580762	4.70999085234536	4.69802198200927	3.06682556834074	2.87208590349579	3.59998109673968	3.57898137805505
PIGL	98.1855338562719	0.894028022046854	0.000714352448864102	0.00397541876075067	1.06776299862066	1.34913731515555	1.61762580816844	1.6968961082297	2.63095681592171	2.56047084860714	1.27962371380977	1.27693985806516	1.50830192389284	1.6258818579303
PIGV	469.779343980333	0.457697715872021	0.00127297810030676	0.00649351509823532	2.95005171527982	2.80793760120404	3.17415955535834	3.27522736446605	3.87293937845423	4.31336260752279	2.53170628778932	2.9322346088283	3.30241735837862	3.10927320538649
PIGW	1492.63396721785	0.550735969780676	0.000290161434122515	0.00184133382993252	6.64460895268129	6.36423032752584	5.26133690795149	6.45063978244681	8.59125122590334	9.10386688195651	6.0672890235273	7.1121358311774	6.90348538378832	5.74689363559587
PIK3C3	806.23051475789	0.391861435572077	0.00627574351988146	0.0246428181584113	4.45244109332495	4.84714954433023	5.41161778583144	5.62039938636033	6.51689105541596	6.50144005985945	4.59031501229755	5.42288172763031	5.18942044686938	5.53041424788396
PILRA	42.463036755103	1.34209138516083	0.0120286415508558	0.0417518982436027	0.650224910485529	0.685746430215351	0.267473689861286	0.233008441108602	1.19760514514418	1.07979122513089	0.924129466265049	0.790644354256078	1.10539862493256	1.11553152693945
PIN4	153.541895382861	0.608903348632039	0.00708978118727002	0.0272863009091078	1.09088533749221	1.26212990878348	1.07457466544172	0.942659923977608	1.43678365467729	1.80948606754851	1.07048304486023	0.889329710901251	1.4554557934014	1.26457099641649
PIP4K2C	1466.82571593067	0.457854633081975	0.00110488819585388	0.00576800401778037	9.01041578024815	8.41824694210277	8.47778640389092	9.06747752104412	10.5152748150625	12.9423082791889	6.8119390990507	7.27832208054817	8.68675206727924	8.46846059570943
PIWIL1	6.40121446660025	2.88697821091224	0.00188525598063244	0.00906311735955333	0.00977357435808384	0	0.0056758800286612	0.00788032248403888	0.0498497080911481	0.0383627979622276	0.00505114623872277	0.0196704471075506	0.0221537614280466	0.0208149882238588
PIWIL4	12.2413050272109	3.11096500041431	5.07874897302918e-05	0.000406923502300141	0.0501541096162252	0.0156722986725609	0.0129450517940332	0.01198183449902	0.219806202704126	0.174989042783628	0.0403207472185135	0.0560782987248708	0.221052849260159	0.197804201939765
PJA2	4353.41564406161	0.590021914149526	3.99333933097476e-05	0.000329703119364781	17.5633841078267	17.9063367273928	14.6542479456439	15.8664798516013	24.9888959215346	23.5733147863831	19.8041283382374	22.3312780624367	26.5364661226352	23.8710679654005
PKD1L1	569.880924856797	0.648671285481993	0.000173201095331328	0.00117868228056164	1.24936327979462	1.22922199100923	1.06094862922519	1.01368300330222	1.63516270914679	1.8529177761493	1.03757389925045	1.08921605695972	1.29574238080709	1.31645224474493
PKD2	1241.43439399554	0.755781555781484	0.000132165334635972	0.000929795249866547	4.65418419142472	5.00468429039886	3.40812960189976	4.0714658159866	7.14660490829988	7.00299115416943	4.27377692106672	4.99789694494033	6.67109557360283	6.23431642566363
PKHD1	308.482231897028	1.56985426714935	4.53142818477373e-17	2.41937070265238e-15	0.227356461059928	0.236176598103569	0.226004823660921	0.234511008898253	0.572498137782769	0.765629162733662	0.177840276236491	0.17107763132684	0.439903678409919	0.37660456432326
PLAC8L1	28.0082457938163	1.1530403514294	0.00269339319860739	0.0121554546020142	0.713079985165797	0.518645001243335	0.59974871342852	0.528688118101587	1.27087189598663	1.3066714963423	0.787895208061629	0.618601646968489	1.14258406526554	1.11717630588523
PLEKHB2	2568.56274082347	0.55673128195466	0.0001102805495985	0.000794696524898151	11.1378884087278	11.8948926977163	9.65829677521108	10.1224504454725	15.3115474051586	15.4689443932304	11.0592452346293	12.3674681239964	12.519213439269	11.8631283152337
PLEKHM3	695.848277083252	0.862998752023333	1.9951420925385e-09	4.26089800344677e-08	1.11248330509194	1.15280887312831	1.271008201022	1.27805379421774	1.96309136579325	2.30957097031867	1.03904349523911	1.12132981321085	1.44830977739697	1.4272455594124
PLGRKT	548.643475551415	0.610637186638735	0.00633042609465863	0.0248298702942543	8.32402988695545	8.31408377911618	11.1826893544246	12.6166015959288	14.1399745942295	15.9644119554482	9.49024336686812	10.982968519674	15.1835398965771	11.7424898696776
PLPP5	435.377493167381	0.975530881433296	1.21913752437111e-11	3.6530585105263e-10	2.68253899181419	2.45426107572481	2.6818695303425	3.00798363575132	5.09877626840953	5.30672668525335	2.58323123208409	2.65162123111979	4.67198775862239	4.71508249814241
PLRG1	1311.99284717954	0.544055744288715	2.81072478452557e-05	0.000243352137486761	7.36863474843751	7.91301734078822	6.67167075426136	7.29386503613797	10.1594358272355	10.6690162785434	6.47509414683014	7.46853721602039	7.74355108802894	6.73101427410053
PLSCR4	302.761852146054	2.53095163976654	2.01140666481468e-30	3.89439275026043e-28	0.75030279936822	0.486421635036907	0.78657552279128	0.722810142334843	3.92960112686852	3.85416797203376	0.997120287732827	1.31395791206316	4.20760414918077	4.16431742538612
PMFBP1	150.891698532988	0.82602112685607	0.00321572659564501	0.0141045274803757	0.762602043813435	0.853908524624291	0.513949662632234	0.602225605878195	1.0564399716301	1.30762820183329	0.797982403626393	0.819520586966176	1.43515658400312	1.41025255308286
PMS2CL	328.705063786917	0.520083061516045	0.0012030698337096	0.00620047890994857	3.5079596508444	3.18756790656745	3.60978132013837	3.9586967761476	4.71544967160566	5.27729746371637	3.17005055361297	3.59201830909436	4.47562066318512	3.509756725507
PMS2P3	230.731228919326	0.598640709701125	0.000527807376258387	0.00306608577721613	2.52974744903922	3.08964071915444	2.75890877342519	2.96220324665846	3.98999587597402	4.37492784550739	3.2531939319774	2.82059271942194	3.62087807036631	3.76039888520143
PNO1	930.230615320072	0.709144960108086	3.95453724567973e-06	4.2685400385135e-05	4.68117073981254	4.8400991903694	5.07245875910811	5.89690593267155	7.55796110524383	8.78641811184897	4.6849170704672	5.5032040864231	5.82346215139919	5.98175305695471
PNPLA4	125.289113833345	0.910117767911758	5.71214696982009e-06	5.91317963932198e-05	0.682108569057252	0.78634043334549	0.663778614975427	0.75312087144254	1.33729875301121	1.30622107528185	0.641532136975156	0.7791693960782	1.02379244125806	0.977192304785859
PNPLA8	867.251114857903	0.461949966371412	0.0096500293582085	0.0349987376003037	3.07930679296913	2.86316792696568	3.3350480365955	4.10815013145799	4.53928454704657	4.45933924964631	3.7831368771198	4.74008332181405	4.53813098367119	4.20917318269366
PNPT1	1368.43045213844	0.448937641681971	0.000389917170545209	0.00237222052066162	5.64605386043372	6.16235259443901	5.36828744246457	5.64603496165772	7.26408260513085	7.9484590472894	5.70413144413897	6.52555676236302	6.07484664986755	6.01363194136412
POC1B	301.383716259975	0.536849038082311	0.0107158995377209	0.0380421990640953	1.78663745593032	1.74409058949305	1.2919569127194	1.41276646136823	2.17566036859434	2.24695875942853	1.55674597805946	1.49082655339258	2.10855855871316	1.78197447500114
POFUT2	1813.6509416233	0.336025560101869	0.00334698804216246	0.0145610622405358	7.39249414436862	7.04269656640294	8.12254090232222	7.28768563377333	9.23021039944459	9.17373756249872	7.30109832181272	7.77760424435459	8.18139374142759	8.10813491103629
POLD3	1045.56888832135	0.44230911694094	0.000524969675402334	0.00305161356348193	4.72890962887528	4.98573535671041	4.53294438390353	5.21334593407983	6.11586010770782	6.79223028518284	5.15926490839449	5.66372137890628	6.41775699634326	5.74278642032333
POLK	1145.82193918211	0.699069154183843	2.6963489309285e-07	3.80360062562284e-06	2.03147202947476	1.98791309789092	1.70000294160889	1.92437092305915	3.0257664626148	3.03870802577904	1.98792281039455	2.40454955525814	2.76284264322456	2.71172673782958
POLR1B	1996.42353959111	0.515186880724283	0.00289526137345776	0.0128849735132489	7.40550993135114	7.72124145499913	6.03897957532482	6.19560891808536	9.05458394001877	10.0629009764487	5.73256541737406	6.22322474610622	6.57197391532938	6.20931940183293
POLR2J4	573.16980250801	0.677947358365786	2.24242695903447e-06	2.57725509401359e-05	1.62636120100017	1.65938255018186	1.55824743800222	1.48645321179499	2.31259770659605	2.63218930390227	1.73766257533719	1.8956135862871	2.11010239398209	2.29358088639614
POLR3C	1207.41415575755	0.435513343088018	0.00255053495463184	0.011623868433952	5.41033879019186	5.85124684694475	5.98448937390037	6.02190269184289	6.83871362981782	8.51550793510082	4.5400155863128	4.88525609880252	5.56246144296905	5.18844466561958
POLR3E	904.499021918484	0.497976769585243	0.00446185390403123	0.0185759461094344	5.04564771063443	5.05925618339618	4.38419516810487	3.88332829712517	6.25181342560819	6.43430088725728	5.04249254621194	4.39951613570326	5.09573326921956	4.79627315891453
POLR3F	296.91553409495	0.58775203510617	0.00593114825134732	0.0234780725770587	2.36261440868186	2.85842429328387	1.87098888655627	2.35026209988684	3.44297605211978	3.48340097307649	2.4182905985596	3.00277331301701	3.04280578650279	3.04952116629064
POT1	485.590583343951	0.766456116550897	2.32625094104197e-07	3.32141129094153e-06	2.12729723418268	2.0583736053842	1.81577462198131	1.89465022551816	3.35587446365271	3.21027570437984	1.92452549058117	2.09481339301402	2.82925022430144	2.60234318461359
POTEC	14.7835772387712	1.61899792940323	0.00534706998350162	0.0215435687261182	0.0349496297962425	0.0340236126588524	0.0156127358954577	0.0289020423483374	0.106041327469537	0.0649385691756464	0.0444616654594738	0.035170083080549	0.085314198737234	0.0954268801093813
POTEE	1582.41188045058	1.14490067048869	2.53566155597671e-24	2.69131451534661e-22	6.84577514828501	7.34546059900444	7.27103991169294	6.81915459307193	15.901454047397	14.6456672406495	6.37966818061717	6.35703105290205	10.1197351795809	11.3090251367693
POTEF	1845.26230925336	1.11622750418974	1.64375612294511e-25	1.98365336508013e-23	6.16566738384076	6.37533535269024	6.91778404179427	6.98634468723763	13.9599963903135	14.0292509237686	5.8249580833567	5.44346627966461	9.20999851165376	10.038036469902
POTEG	501.059102306115	1.75330933465397	5.35532356708567e-27	7.48852745464147e-25	3.07797816381692	3.50315155270181	2.80967269485621	2.84320439209442	9.72331302698901	10.3999924101858	3.15351115942021	2.64323002469219	5.2377549246875	5.52357066742861
POTEH	630.461890154968	1.43153260573256	9.81579747026625e-12	2.98695225610745e-10	4.46331360376235	5.2301584358731	3.50684122183203	3.84804232253493	10.6891086980608	11.7745931407691	3.74501950527654	3.91902516157504	7.26043037269567	7.14474215322635
POTEI	35.1620460574657	1.30459627177397	0.00350422853338958	0.0151623287155675	0.132542748172081	0.256269757429715	0.102630038882558	0.142490292053402	0.390594391823975	0.366843569876148	0.0856253786192411	0.166723492212697	0.21280787929395	0.337166698961936
POTEKP	216.28797188677	1.4852543219671	2.67042918669714e-12	8.69679011015636e-11	4.42086625263819	5.57063149483582	4.56790437553008	4.25887650692945	11.3620729831248	14.2842473999943	4.33217535573858	4.56430393946798	8.52416806870076	9.5374879374713
POTEM	261.588329021399	1.51212791536427	3.04896548327619e-09	6.29036567328374e-08	0.561606648982964	0.612970027222033	0.413118238197713	0.506005129536173	1.18942929059102	1.72475612268813	0.586023893417111	0.530163697739421	0.97293098793632	1.00621389217766
POU3F3	372.412682463002	0.730905782448565	0.000488912127527381	0.0028778099519247	1.68537546427336	1.64114809351854	1.23608725758668	1.27596166985237	2.42684221149712	2.31262875795158	3.24284933704761	2.83463977066253	2.69031030923815	2.89284914010416
PP7080	199.70482545907	1.0982431862415	0.000155702967275381	0.00107792950114929	1.91259261655198	2.44494153387803	1.42551534213811	1.37442228063558	3.71424083198376	3.76750814463947	1.08889150448804	1.3894580882855	2.23718673064777	1.97492799340727
PPAT	1608.65858859766	0.795035594465701	4.24636009294629e-07	5.73307421284449e-06	7.64702199110809	8.45074729200377	6.43205075533211	7.57900551800412	13.2106951100305	12.3180308936718	8.7454088758396	10.7820830012539	10.4950662080589	9.3258344213424
PPIC	1352.86016618315	0.54378137298817	0.00178950741374916	0.00866190415462815	17.6250756851255	18.0504685572957	22.9336412311466	23.4600005642631	30.5244120648638	27.8536260466721	15.3107598533899	16.5025502471618	25.0100910568278	24.0209005848617
PPIL4	795.346857251141	0.63809907016161	4.70937451155054e-06	4.96717032494907e-05	5.8954323951158	5.64867309628281	5.28671266492809	6.02024295494132	8.04721437689995	9.32076942516715	6.14461773860982	7.46179082132551	8.34002565975057	7.61128712246321
PPM1D	2441.13062527456	0.53329565213652	0.00166845573211657	0.00816570042893387	9.96028093158631	11.0619657441935	8.75989920585049	8.56143837053455	12.8061385164734	14.3190340281682	10.6694419867131	11.5928564457944	14.8327896360229	13.3734621764404
PPP1R12B	969.715561606274	0.474382293218561	0.00106734303859771	0.00560355095263799	1.35463523017819	1.56094833064035	1.57847748293338	1.59642269786569	1.88828220806101	2.23917394105766	1.40625106332552	1.54149859189535	2.04648123805083	1.9607571852822
PPP1R26	843.275162396225	0.501421694211714	0.00779187369412827	0.0294340962352284	2.85911530954048	2.80564651929687	3.95052297936481	3.357362501813	4.74417205697298	4.22138685807977	3.78469729077167	3.25907242393131	3.78112422543702	4.42378429366241
PPP3CB-AS1	181.406532680777	0.634619203452076	0.0098742542843423	0.0356246668276965	1.13470724618467	1.31211320185309	0.949982768635528	0.87310408518473	1.48066679319419	1.75303923029621	1.04784437488836	1.08969828086339	1.31213257347273	1.31666401761363
PPWD1	867.734330737957	0.422433634980859	0.00162422294870551	0.00800033104088411	7.79830219497954	7.93171057356269	6.85181122009335	7.90575670710613	9.63940596537793	10.3162350040644	8.33623223749001	9.1404983157683	9.65333584097324	8.53644746422391
PRAF2	400.046917070129	0.546572780890953	0.00389357754703196	0.0165782848721982	5.76515354979228	5.28954458454594	6.85438018286909	4.96706124718722	7.89692550047223	8.42779502784022	5.08562378736139	3.66195149271943	6.70385015543752	5.55371893747778
PRDM15	415.218462868331	0.45358719677769	0.00138205260979701	0.00696720598913121	0.958046521597143	1.02811024824336	0.982305247768216	1.13590117171833	1.39346405411981	1.35083912493836	0.850494053858445	0.85568721004551	1.3325752387092	1.42207742636318
PRDM5	189.333567031534	0.59691234546796	0.00138792609246461	0.00699081470072438	0.719878840885269	0.665476448906354	0.611607110570173	0.609093387137976	1.0108540395334	0.917728030495851	0.551178357939373	0.546668533411862	0.887641456208442	0.936919626973647
PRH1	123.016668445413	0.792298265358902	0.000363886894619013	0.00223235487336086	0.396155547314332	0.348696017233998	0.326653394748722	0.37387083839457	0.68277948610326	0.544194573183655	0.475121354501581	0.404740721349866	0.644341869280265	0.498062591841328
PRIMPOL	293.669165316256	0.949627138153039	3.19875495481172e-07	4.42377264904456e-06	1.99982367634639	2.15928925130355	1.60103477423851	1.98867009969002	3.53600596059877	3.76954214769675	2.14090890579711	2.49398572654003	3.3754663806618	2.94078423367851
PRKAB1	509.476053476639	0.561016578420025	0.00707358830603867	0.0272414322107312	3.63073836678545	3.0904128076307	4.68269321828152	4.42206544430451	5.43308252076532	5.9632255042788	3.86029591164803	4.03469462370951	4.4767391023346	4.72275697823203
PRKXP1	121.673604099625	0.529812400809454	0.0138678618525129	0.0467990534340978	0.188596423409268	0.221723886240864	0.172367203700779	0.211060347182638	0.29015538728267	0.268849730824377	0.190145958722201	0.175785431591722	0.243530005958257	0.234849093633604
PRMT6	904.814860769712	0.664686314057856	0.00423666136081483	0.0178024375908756	4.67857908819188	5.32171753098286	7.36251529220074	7.32777281339333	10.276588751682	8.8086218446649	6.62161845752422	6.56832721605795	7.60325111671711	8.31293490477561
PRNCR1	100.580019220561	1.46380648721498	2.59830880346426e-10	6.34945947409664e-09	0.0994904082431449	0.118225947461537	0.115555599313275	0.0979186746012314	0.268732323548998	0.309704450374466	0.124562647947022	0.0789662847568642	0.188987849415426	0.232777079436004
PRNP	3669.79245412878	0.937360583451649	5.21216818095293e-15	2.2619012605963e-13	19.3306264534655	20.0441244576329	19.4761274091168	23.0832830917077	37.9737181471359	38.6224845945872	25.7872671978118	28.3980731780393	35.4187521169632	30.4005571597692
PRPF19	2571.38402065131	0.403388966569682	0.00627864506366047	0.0246487182211751	23.1598627660686	22.9145783989496	20.3693653902428	19.0994231041529	27.0031693284114	28.3115330305731	21.8441611206665	23.7659350694304	20.5323333095795	19.9784036031419
PRPF3	1287.85952267264	0.520303193136109	0.000543203306347398	0.00313587780292753	10.0100448587525	10.7171893375069	9.27254900935661	9.40739652291908	12.5418384375927	15.0616521467112	10.9003366685749	11.6901395282778	13.1085506353881	12.0748904483351
PRR14L	4649.32220050359	0.459565718420252	5.73270080201696e-05	0.000450309654171809	7.63755553007049	8.46166988467973	8.14609346765874	8.70812023119857	10.4529479069556	11.6679243772228	7.24095901298044	7.89614037995038	9.76998065123513	8.76582437207205
PRSS16	81.1528895070595	0.706857512960227	0.00292701228740086	0.0130065648150607	0.466675382961909	0.568729393451824	0.498669149659465	0.488321442417566	0.787072082179652	0.819131484994843	0.765362372071351	0.745128894830107	0.557114905189495	0.8481181379757
PSAT1	1589.98987110158	2.63600105491567	1.05939908720764e-28	1.74444416051509e-26	6.4875738898617	6.72253734250466	4.40544900948001	4.55337328666394	34.1348174190325	33.297652893146	5.21923119015602	6.28993935275273	18.5384561056399	16.3018263800304
PSMC3IP	367.23095885513	0.640283636106405	0.000205238862518942	0.00136559800555938	3.44835396866793	3.0638473221597	3.8378580790162	3.13608179146623	5.48616682371689	4.79540339954133	3.00595243316768	3.20735581200935	4.75513705900424	3.83500389094126
PSMD5-AS1	355.687514692902	0.683823923263531	0.000418723622982103	0.00252308191290071	1.95261501993794	1.7556729592729	1.41744567919552	1.58950959678054	2.56003320279866	2.7153905398312	1.56708420686467	1.89880410751939	2.665170995685	2.15923441821716
PSMD6	748.746415466435	0.508296651680192	0.00569226311313746	0.0227264862430023	8.47290856898523	8.68728029422794	6.66943342440073	6.90187835873114	11.0368824209766	10.3383260333536	8.08727747687095	7.75654558317252	8.06632773517014	7.49294350663536
PSMD6-AS2	133.710191417522	0.652446305303687	0.000999661720184825	0.00529397049832775	0.874215360393533	0.953935130441677	0.901656629362778	1.07516164464853	1.48392157333204	1.43592194732505	0.874702376987894	0.893805361233796	1.23650841345275	1.16178501552956
PSMG3-AS1	216.026199475232	0.593329985267229	0.0094503215083121	0.0344659935116851	0.51463624795453	0.591339717407926	0.737778263679332	0.7903721660006	1.01195400823659	0.926992718782321	0.586659555496554	0.52971975410977	0.83989872425592	1.01878757274362
PSPH	538.059428767069	0.842434633675046	3.58633134940706e-10	8.58526794092432e-09	4.50304287138458	4.36734353029975	4.42853705669683	4.03567759650964	7.41831440701904	7.76638919460895	3.61049637097601	4.48909693763252	5.62818505628108	4.89967919210909
PTCH1	610.608709367247	0.728186141675028	0.00112273768671657	0.00584387453537938	1.2539716374318	1.46802451272398	1.13893511729695	0.937056948963254	2.08277054850629	1.80396805068118	1.74457688854198	1.89182530572506	2.6066353506369	2.53138383289155
PTCHD4	144.417001511393	1.56586699429272	2.20450001914455e-06	2.54029338373498e-05	0.409776502968562	0.508426382327588	0.251970919781153	0.285049393403719	0.983551976678044	1.11873148969286	0.715422614883329	0.869770405308795	1.03031037888892	1.01204989681359
PTK2B	148.177744874787	1.16270367692614	1.43736559259128e-09	3.1304010353357e-08	0.426660761155394	0.453881837716592	0.530029151379895	0.474636497286311	1.02437467162404	1.03507146367385	0.387322524321525	0.601092838646384	0.920858785119854	0.974513996012336
PTN	342.166971210685	0.578525077084929	0.000410256923108565	0.00247969699082326	3.61886036300981	3.4262275024466	3.630049333763	3.94572382259641	5.9009175101243	4.78039060260752	2.81605772312461	3.43477315860012	6.21041223479109	5.28407802551145
PTPMT1	596.077115639475	0.581789130538424	0.00150729438866856	0.00749563077447116	3.47431306641	3.62294354883118	4.29225791084228	4.74227453381086	5.44227820421667	6.33338992109838	4.14934334761206	4.83186585708745	4.85933863078374	4.95135392868387
PTPN3	978.397975722361	0.458549861687943	0.000381937384220042	0.00233334076718894	1.79379749304387	1.97237534149738	1.93976429189738	1.95971774362128	2.37792315470238	2.76188294121882	2.49348372700982	2.67654583408205	2.7814579895692	2.58560431736836
PTPN7	29.3485960558637	2.20998853533271	6.86163711388839e-07	8.90900400218125e-06	0.0496458564747596	0.0407228805029771	0.0816884139840921	0.0934007495717877	0.298232906665891	0.304793070137229	0.17532834547071	0.174856534232448	0.192242619474941	0.199715681858254
PTPRN2	163.438452063641	1.60342526557288	0.00157011716031895	0.00777512485881383	0.274578353933692	0.159268151132676	0.605940079394016	0.582992144094502	1.43315319421815	0.969986432572857	0.443458352879781	0.335026267409003	0.704075030121393	0.877163000084369
PTRH2	1175.37236191089	0.501773996541478	0.00077859340666284	0.0042895676147569	8.76092639432303	9.67709025217763	10.2315561026928	11.5075994264938	13.2921058040115	14.4602704827868	8.24216009392282	9.38992716195682	10.9849126665815	8.83605626223628
PTS	422.409872857679	0.555824920123897	0.00287339548585859	0.0128038328440421	7.11934781763497	7.62234159571753	9.93159896612539	9.11053025786408	12.434972322742	11.8025223730353	9.13437604358939	11.8507915087871	12.2653090465617	11.3818316763267
PUM2	5211.21576445111	0.34357817459969	0.00426383486861781	0.0178825295287258	15.9847207517144	17.0220413019082	14.5733311681228	15.9712788395932	19.1196854827563	20.2769582105783	14.595396356966	16.3314455138906	19.3205092703755	18.2747710440221
PUM3	1424.124564875	0.442272817999685	0.0001079550100996	0.000780171994645139	11.5847379293497	11.9295362160702	12.7742138628649	13.2142247635013	15.8331479155067	16.9992024934858	11.9826755628643	12.854313628534	12.5559413034971	11.8171350178909
PURB	5180.9258411544	0.386343377518863	0.00103393213604185	0.00544762269884011	10.5064215344317	10.6716831985365	10.8753981090509	12.5869402009482	14.2900172072197	14.192578177219	17.2431300784808	19.6459937110804	13.2672891072278	12.4119502373327
PUS3	128.171662624548	0.540382325785183	0.0116900832480917	0.0408179898430693	1.25678413871412	1.22348468297641	1.25760756973442	1.4758254272928	1.65678370388142	2.04328468372151	1.02925048390599	1.36199711859656	1.2490684751362	1.29025835896961
PWARSN	166.942338162557	0.811059779451272	2.55555236056467e-05	0.000223788653284239	1.57734721259546	1.43683233047101	1.54399097727908	1.8450391545045	2.8874992628405	2.61192176350609	1.52785789668906	1.65717770089388	2.87828769511903	2.2958804595852
PYDC2	46.407865222642	0.972292721505439	0.00615121031831999	0.0242294152914107	3.15307476433856	2.55794303334298	2.81708984279674	1.76004590337391	5.27823630270138	4.61365341646833	2.88307057152242	2.80685237093865	3.29864986487813	3.18540119104713
QKI	6383.39276855663	0.395517443472347	0.0126186875301528	0.0434088343786129	8.10833218678013	8.37126801094139	6.4235226811494	7.54088199989324	10.0902779970526	9.4874745519764	9.58042590396454	10.5847346715059	12.1272305939481	10.8672506663911
QRFPR	233.70427508636	0.890980612264113	0.000660930538903982	0.00370975953008896	1.31404811923395	1.38850422858072	2.02027472045306	1.97610418238013	3.45055983689327	2.61446912820745	1.02849687845366	1.22297044820357	3.97714292933058	3.40787563483046
RAB14	1956.14862188254	0.371032545193098	0.00783378710221955	0.029568015200087	8.88694113990149	9.63529007008446	7.75451920765634	8.96091825203126	11.4204390148804	10.8466149386174	9.21540242651249	10.7850496172249	11.183409688298	9.22985144561489
RAB24	382.849708515142	0.687396825961163	9.73824106711982e-05	0.00071223773084925	3.70305266902304	3.58501488533887	4.00826388399236	3.62664524733634	6.68470760950297	5.06941580761846	2.83562944998237	2.98503045959672	5.61411731693063	5.09248477524663
RAB28	328.844167010826	0.43806725370076	0.00335093826644991	0.0145706271758591	3.38750842209866	3.3397177672065	3.20914979862546	3.52984907938978	4.76186425995103	4.15979791406982	3.07109691314345	3.64692595163429	3.57112989949684	3.65424574576313
RAB3D	36.7807805949706	1.37556411642107	0.00110748628473432	0.0057781465356038	0.154364377785715	0.117331344379879	0.140524853730898	0.0717620193070257	0.266698854839719	0.347670582752821	0.112120551942518	0.146941416258604	0.122937044460997	0.136240016532853
RAB4A	493.560580062991	0.558000531046054	0.00633455358835063	0.0248405296401402	3.36569053953873	3.48554504405048	2.64022115431407	2.6205772246098	4.08242665105045	4.63240192568407	2.96282430368501	3.36327702689524	4.8862949357581	4.11981768897031
RABGAP1	1412.19672985975	0.561801089393168	0.000129345742356643	0.000914503464920423	5.45971923029023	5.74669866350636	4.85850788841053	4.96471351152858	7.12031332002492	8.04536001516836	5.71338293503382	6.14010704559501	8.1277670292865	7.513815184924
RABL2A	197.394423587919	0.712776098603059	5.41942688076879e-05	0.000430112082037231	1.3743989795238	1.63879037438249	1.64300605078533	1.68492521858909	2.49246742450039	2.57238565901676	1.49539434905091	1.44777328648035	2.64167124548682	2.31656366685442
RABL2B	698.296471804045	0.632717177676733	0.0125723095644249	0.0432893340268911	3.85025030216624	3.77550827230272	5.67504687195975	6.2124895835026	6.85883200745241	7.88459730143645	4.20514875492348	4.92374751268268	6.77336012248699	6.627695944551
RABL3	411.42658142167	0.499538787910635	0.00100106691638836	0.0052982270951777	2.07514906834239	2.1885136094185	1.84500159135112	1.92488495226917	2.79123446122686	2.75575589937219	2.29205224164041	2.59181823191613	2.46113855003478	2.49003652069047
RACK1	18182.0759160166	0.384047516143637	0.000877724609348184	0.00475249843027218	334.067363654545	332.527519966081	316.259994252872	300.763471839225	395.034223033973	423.63794313513	296.121312097615	311.036701144629	379.981635635301	344.220819935944
RAD18	1161.99683305478	0.473783161235196	0.000483265400487443	0.00284907560648934	3.92013827007857	4.2500453040841	3.54654381751152	3.74683176223851	5.348766838764	5.14343170562195	3.92676583876052	4.24807623430478	5.37582503135947	4.84256947148861
RAD50	1844.37333065984	0.65588325520399	0.000275309974792015	0.00176364036624064	5.58022650207432	5.5972306902409	4.3219077526836	4.72369249677169	7.18549122637106	8.39087671529287	4.81264209308427	5.4305104109271	6.11609036736243	6.17716406626373
RAD51	615.122274273792	0.633195992718779	2.44315183789532e-06	2.77357553040449e-05	4.82507634590493	4.77532026282517	4.25235055423321	4.67244509334616	7.26405002531507	6.77940146651297	4.63710252918436	5.88591798475059	6.7625729926143	6.35913372461532
RAD51-AS1	214.326179228958	1.1785727506333	5.11415189819662e-05	0.00040920182694971	3.37692063459574	3.53379266632757	2.6269673036265	1.90805172138646	6.23796847624322	6.43066053291005	2.37029153824992	2.05473851019489	4.52147535443537	4.05868429409572
RAD51C	860.572035358143	0.73407798537429	0.000106812007155323	0.000772862732677466	11.2405536326532	11.1007626946001	8.58058009652125	9.23413376138934	15.0321152270795	17.6170612501056	13.2627542831985	15.1886533927511	16.7723155390003	15.5245418580549
RAD51D	618.094155132574	0.511015004380044	0.000903865700573876	0.0048715845146562	3.79738566848556	4.68929804571094	4.73935542743324	4.89144007796255	6.25423473212469	6.33737055915609	4.44607291298613	5.08585428421653	5.75922292442703	4.75439483148837
RAET1E	65.5083965111094	1.77099973668365	1.61653797436745e-05	0.000149119280473194	0.230341028880886	0.176672337933321	0.340499465337257	0.480249191071137	0.987344320131395	1.06218802227227	0.346310066948047	0.217745842061344	0.696152027082737	0.51533803264332
RALGAPB	3325.4393043649	0.379570360137439	0.00112384640187723	0.0058466001525223	7.45462824510579	7.97455545941227	7.04983551842077	7.58115361606944	9.12472591294606	9.9760417350099	6.88766755831549	7.96274934667979	8.80034425612822	8.29114050059513
RANBP9	1006.96074232687	0.548787795494934	0.00741215773660041	0.0282428216178985	6.45391216898372	7.1587893655929	4.76235689261232	5.78703746364009	8.26404073063991	9.01191408322254	6.53483647692329	6.96140472104083	9.10585778432286	7.90308929044856
RAPGEF2	1975.51131987522	0.326719314656049	0.00250713545906987	0.0114586821409473	5.41083419828886	5.64210220682968	5.73502902358745	6.27216358293247	6.96831673173717	7.15048630675517	5.42260249678495	6.14202500358816	6.8818808315521	6.46878559539737
RAPGEF5	184.611037044211	2.40657042458971	2.26115425343429e-26	2.8869041153086e-24	0.215366954142494	0.264987756096841	0.20324141836245	0.306778026850702	1.25225598328493	1.30703923426376	0.442438304913749	0.493050361325836	0.75666704088642	0.775919391888115
RAPH1	3207.87579588236	0.460052225228259	0.0119582924619652	0.0415640868599271	4.65156952919104	4.92997121656538	5.90095898237821	6.73320890563763	7.14622411093264	7.75443072648053	5.29961437575885	5.82082126575126	6.02575921294732	5.63937408575798
RARA	1328.2703858678	0.652650213617023	0.000986446621246884	0.00523342457685904	6.34430255089037	5.71944565882306	5.56929166112457	4.40780534602754	9.1461011776093	7.81037956645576	8.75906980180651	7.01370292005433	8.00571203161433	9.33275150052313
RARS	2837.77780073818	0.397968114396956	3.364083465319e-05	0.000284550103578759	24.7810303544522	26.6507035757381	25.2767273149164	26.9008408736337	33.1495242747461	33.5140848113646	20.4347168785681	24.2744725798481	26.2711695856933	23.9140654228386
RASL10A	41.2496961984234	1.91684446328393	5.47564815653951e-09	1.08156328329675e-07	0.311075161313938	0.302832987303155	0.277927655631625	0.347284225229482	1.23675452965142	1.05484424868694	0.358638163011382	0.168558569576649	0.583075106149179	0.713465153401957
RASSF8-AS1	329.11894770378	0.749147259954644	0.00021042606912535	0.00139694683945725	4.62120562342225	5.41132376758498	4.83258248816668	6.52386018427708	8.05247535571255	9.47416282754475	4.65764144391866	5.79225711875476	5.92707128626972	6.60795227629159
RB1	2016.22180089496	0.616097200577192	9.01182442175358e-06	8.9151788033058e-05	7.86001827739332	8.26314229593364	6.71674032132707	8.12060296239545	11.564530570695	11.6179243967368	9.69210383737223	10.6576559944498	13.256380019377	12.5918639909522
RBAK	2827.86750580856	0.855281003802655	2.04811068557512e-13	7.67780046152085e-12	6.80438245015018	7.30328882538532	6.82612800445151	7.97771057044415	12.5973060044629	12.9370022989945	6.03877745398621	7.16283422370729	10.35117517731	10.1365863517868
RBBP6	1168.82825366678	0.393297000289583	0.00652122494953216	0.0254818058074534	3.14969866656061	3.41331692751379	2.91636352978725	3.10611555604612	3.70921400182514	4.36186086507342	3.27594957383273	3.32532486769652	3.87878899922454	3.54410172148507
RBKS	59.3907124635827	0.777874919463224	0.00770984434596541	0.0291752035076385	0.469916726625996	0.492965925170617	0.424508329239852	0.344808620958514	0.700015047310409	0.747707847968787	0.485721603836076	0.51791711112299	0.481858215094383	0.444796267183647
RBM14	2370.05070359846	0.401829876112551	0.00188906261690153	0.00907151655687873	8.30190217610263	8.25704200395074	9.51607947220673	8.09556736419843	11.556178321811	10.5003918888588	9.66483911116125	8.62301178725023	10.178717157492	10.0644914393298
RBM15	2569.51512199978	0.558171821372073	0.0021791151323648	0.0102219993389604	15.3277904127011	15.9203809742386	11.8524682939983	12.6686370241102	20.7981990264407	19.3654213742444	14.8014160757039	15.9211945309101	19.4504730647381	18.3691209395886
RBM18	443.685908381502	0.609369663565809	0.000692469277248235	0.00386952622766782	2.77682501068518	2.63872018176433	2.0976477775288	2.39051632348185	3.5997828511046	3.78599365643056	2.61234772410985	3.19821003607621	3.23931531262351	2.90302910904778
RBM27	2820.36379478886	0.651770204566851	0.000386501658238608	0.00235550768471326	8.40104172125759	9.04205483691584	6.51245267259202	7.27623190369667	11.5302527260416	12.4606266329591	9.00761177185284	9.96544552288366	10.8898948377499	10.4959482637211
RBM38	791.849481754813	0.723991632448366	0.00121500396771385	0.00625026420646724	5.12418588373973	4.53118395141537	6.92687689063047	6.04112374080754	10.3957111056941	7.85286901965705	7.97446662229276	5.58982792586743	7.79213073455661	10.5258814523588
RBM48	279.084460901102	0.535258741728517	0.000234749809542453	0.00153985736944471	1.09874235291595	1.10129566980439	1.15693536154269	1.11172208242304	1.54096302167397	1.62086267037652	0.880263222705223	1.09036950569302	1.20217109998797	1.07419366823678
RBM4B	483.589353400055	0.395819174858889	0.00620900948409866	0.0244297762617986	4.82411757860267	4.77159026360801	5.61431950774297	5.27971350045593	6.25896065910759	6.90046427473951	4.81649255575425	5.16586049981983	6.78222268516936	6.21794719801311
RC3H2	1340.71132958176	0.793234823040871	5.63540909493017e-05	0.000443458118997654	6.16598462637409	6.24606061128923	4.46862386187894	5.24547903265334	8.74459351965678	10.0010114554221	7.66384260650089	8.70050396465161	9.29837379133762	8.54352629558381
RCL1	916.294824651238	0.421110284827554	0.0014928197277499	0.00743204034564158	7.84140278954573	6.99896753378525	8.00173391517798	8.013826028128	9.47555719234955	10.7044238335486	7.33702788368009	7.88307474391282	9.66785146568004	9.41882284322273
RCOR1	1427.63369312272	0.723896451748996	4.92993357329713e-08	8.11780370354413e-07	3.9426286532143	4.3289497353024	4.40299983699385	4.92774800836521	6.82839153634144	7.35758557926251	3.63025423853857	4.08593051009294	5.21603307985658	5.29438410684079
RDH13	232.827035156985	0.62283342270763	0.0128965364889701	0.0441554753982052	0.135297069827265	0.114150634534583	0.172858546786861	0.193935106567803	0.240979289998987	0.222540275623891	0.11320993319141	0.123183775742551	0.127782447557508	0.162824812832591
RDX	2460.65966476671	0.474780228189644	0.000298954519045234	0.0018884805699935	8.42508886582877	9.18581871494331	7.53881270656151	8.72232954397727	11.4023354222295	11.5917903490671	13.1855674965892	14.2597268620764	13.5690271365866	11.9711844601437
RECQL	4025.36837031068	0.606510113883175	2.02004292750439e-06	2.35702889666886e-05	20.5394962649635	20.0529466896002	17.3249907143388	20.3516595396628	29.3862907941645	28.8458129545831	19.8065027698153	22.3590365068605	27.1385746557273	23.2882869251384
RECQL5	1603.25113954633	0.570044743459323	1.89189047480138e-05	0.000170851964508075	5.4357736574114	5.2891453903716	6.48522877522836	5.77350876898884	8.56708142033927	8.09725093343526	4.71947930644686	4.58433332396609	6.55419779564912	6.9709054332388
RELL2	396.681625450893	0.708108420233108	0.00114193228244166	0.00592453029574195	2.24304099089125	2.33888883319762	3.42287867484531	2.95301890201729	4.45887594168752	4.27606902014138	2.19007375687581	1.86825840031018	2.9176066386168	3.65505713461835
RELN	12.5419285153761	2.69803714531831	5.28140109932776e-05	0.000421054325651836	0.00616264787110705	0.00433287386168199	0.0125260800632523	0.00993774658085691	0.0398142824557216	0.0651251742594844	0.0175172756259154	0.0031007601351804	0.0296838576769886	0.0196870824580339
RER1	1337.04943729034	0.370089571338254	0.00902555983768575	0.0332124767711331	7.53512355458703	8.02752405811875	9.20545820730907	9.1379244639659	10.1237048415376	11.2576710619624	7.07618721739753	7.63466832916103	8.01269576351416	7.38781870691764
RFT1	553.523417769163	0.514745114758655	0.0001060931116673	0.000768607950027206	2.02468277467142	2.21273612731317	2.01045059249809	1.9510800474566	2.8679638099975	2.85072739542473	1.8253086792516	2.08319989704885	2.25900575534636	1.91644878630089
RFX3-AS1	11.8622886282606	4.37513408644557	4.43221002124001e-05	0.000360531432891172	0.0964490511946524	0	0	0.0172812842932214	0.677776229469403	0.563012710275366	0.049846478301697	0.0808811891888466	0.582989516245368	0.57058218395429
RGP1	1009.92464028704	0.426844410868393	0.0023676969328065	0.0109401095280879	11.0056025666241	11.358637660699	12.0230014639035	11.1618778574156	13.4720679713569	16.4142520889533	9.96988596031541	10.7615790302555	12.9438867004172	11.8521052107692
RGS4	244.612867848092	0.526975132203554	0.00130783836935343	0.00665015995083348	1.04864703700853	1.21621253224357	1.19195192782889	1.17552699965021	1.5420978375893	1.71030691423294	1.18119112043979	1.25819656249926	1.11737825362576	1.01167749702206
RGS5	192.764536129298	0.772289776639396	0.00506145085902168	0.0206095915611516	0.585908931776854	0.47947649854527	0.409984472070278	0.33301155876516	0.738119470839276	0.774328146136792	0.548528354906817	0.69592685283955	0.887200850982678	0.719373170598706
RGS7	398.154889956321	1.04767826408886	0.00220440113459671	0.0103076814199733	2.98962105581934	3.37676284129896	1.5271995207553	1.91947035114328	4.94162323686164	4.9897664667239	2.61806243061452	3.11990395862368	4.62752171941123	4.04819199543768
RHBDD1	677.980724926447	0.615887455999135	0.000112457764474566	0.000807413753984259	2.49584908517406	2.62976582784134	2.14403644056485	2.36356497243205	3.34294056409637	3.86603341032225	2.45116053800629	2.51854957916432	2.75814974158512	2.6945420008603
RHBDD2	848.009878004278	0.383334114506646	0.00560408469157298	0.0224150665563733	8.2706335875368	8.52691291472951	9.21426138095334	7.96987196961709	11.5715375184111	10.0878928240051	10.2076663639929	9.02019291566789	11.0167312686729	11.2119428332807
RHOA	10032.6807851233	0.448812115237173	1.64117623810832e-05	0.000150996784016869	84.080316369826	84.8423356920949	91.6430886619355	95.5419744179008	122.721275433166	114.600399831532	82.3631661768346	92.1950319059358	112.23640957088	99.0502471063356
RIC1	3222.26494540006	0.387160614769573	0.00012102689267321	0.000861913024255978	8.44934826778007	9.38920309117393	8.91668946411667	9.43813709902448	11.5756242426766	11.5357881292559	8.3766800611834	9.09710914344781	10.3035488669568	9.58921515154794
RIC3	117.445405278415	1.98343238709264	1.34237654217421e-15	6.12728815973249e-14	0.222039067211667	0.27373176429154	0.197835553539522	0.179845066620891	0.827397987221786	0.852251964777862	0.201211604614756	0.214257181939265	0.517084893935639	0.466403476106966
RIC8B	407.05006213973	0.472521428519494	0.00462060630834225	0.0190893752346089	1.36218472741233	1.71057882149919	1.36174513955833	1.48263302080238	1.94491369750153	2.05850265214281	1.29592000516602	1.27189013785557	1.69360684589791	1.47699769698255
RIOK1	381.398434740763	0.5335779205505	0.00137900132605608	0.00695381349850659	2.75910506285059	2.57679521240951	2.52194012730435	3.25610767849416	3.89379975889498	3.96700222646941	2.67321236349647	2.8808888182714	3.24458936961393	2.85706302286337
RLF	2485.70201591201	0.44602988142914	1.57195700018829e-05	0.00014554025426336	7.2135171299372	7.90138371227512	7.46395841700557	8.05847577135164	10.0246375155426	10.3518079589772	7.33820180814148	8.43010529235954	9.6139810041846	8.87708292656406
RLN2	21.1828552509858	1.83830510263161	4.03965507946855e-05	0.000332591975911946	0.261612153886823	0.315318763858631	0.195335946646755	0.261157521651334	0.94039331926077	0.857604338770494	0.135205524478013	0.225653430969638	0.783602228121599	0.477566522268157
RMDN2	132.580749070542	1.06911192857603	1.71014799358662e-05	0.000156687974513795	0.488969132685118	0.608790441935629	0.703990751714906	0.596851121899685	1.04608045724163	1.40255063860637	0.473826380884989	0.615066780414383	1.27575283524162	1.1787706245356
RMND5A	1827.46647712196	0.778084226216008	1.62047577866265e-05	0.000149326164980424	5.4320018278035	5.97200887328469	4.31994781570068	4.85710297406001	8.23916104328609	9.01190849024102	5.38820302665051	6.17130929806846	8.41761241598691	8.13817225493483
RNASEH1	701.498401444648	0.56956043074847	4.3772071602849e-05	0.000356551146357188	6.54419577446499	6.40106086888766	6.14374743461863	5.68660258271893	8.64725321524053	9.31652314563426	5.40618201258062	4.91351493626326	7.02296359427423	6.22244425899656
RNF111	1833.96432565067	0.344463949153069	0.0083875953841219	0.0312631781410713	6.07551855108675	5.92925583999692	5.24963415984214	5.82168312213318	6.79884407874786	7.5156128138559	5.9723095907482	7.08338709919283	7.1747338680009	6.35290248753063
RNF121	894.335769583056	0.43070208623752	0.000553238025029452	0.00317818740234559	6.38897916992231	6.01664610798444	6.62369016468914	6.08212102460187	7.87099739502099	8.66218733917414	6.40982754420789	6.84617269351945	7.5490752013898	6.93893405539589
RNF14	930.378877209462	0.728357999086823	6.97458507625892e-05	0.000535214348687308	3.79951970871008	4.26203190092402	3.08089227545572	3.41096178340746	5.65028311040754	6.13113703336701	4.44063095555121	4.97370495106258	4.50273364266141	3.77175133947891
RNF180	660.346990992478	0.739934434292184	4.18393959454296e-06	4.48352766126547e-05	1.09818257383959	1.17260254117815	0.917071692056304	1.10119016864253	1.670044172709	1.82790172804706	1.33024308282014	1.50651716013099	1.93298300265666	1.83190296359548
RNF217-AS1	8.19936362656354	1.68027416725825	0.0145750882558724	0.048682176299567	0.0133485583145975	0.0187703794284996	0.0193800171701199	0.0251131804508195	0.0590059292777888	0.0604559601558935	0.0034493787867579	0.0268655151809602	0.0416036193646881	0.0805480038494214
RNF219	662.268866721015	0.475843830609274	0.00017547363896899	0.00119139500770506	3.32427638811729	3.73109359034419	3.45093505742601	3.81238138926749	4.78214145920416	4.93480755921061	3.70200137238005	3.94424191033983	4.6765875737141	3.75296475846951
RNF43	171.973487083597	2.77022744064298	2.76550641293264e-47	1.53333499856767e-44	0.214119762189455	0.21936512149362	0.20250854317771	0.230189790611321	1.42286189452862	1.46294295017733	0.148601463539199	0.203157781794387	0.842420726259091	0.733967628681517
RNLS	190.646153230407	0.680431983057462	0.00843411829831307	0.0314100042904202	1.07906803891895	1.16074246210386	0.802811670263122	0.77515116339511	1.36621294257684	1.6215350919805	0.976583118823857	1.12590676331085	1.23986909147093	1.10846053885449
ROCK1P1	91.3678826515019	1.73095228740334	1.1367642851621e-05	0.000109565918710455	0.492979249606285	0.68301968104636	0.345233844703863	0.288370450753865	1.25227980804102	1.67234773426004	0.352195741970904	0.517975108218023	0.895592157803684	1.01902868740993
RPA1	2132.03946382068	0.397930446843584	1.69603114434924e-05	0.000155637357980673	9.57611441528752	9.61174322595722	9.3782833505377	9.72582327733199	12.4833856986768	12.1650378154213	11.5394081021818	13.7570172481637	13.2803871314875	10.951606048055
RPE	1944.8244527553	0.630549276320602	0.00300933203779811	0.0133253131877268	11.9067064570123	11.3288049344336	8.0223163617424	9.1641787775355	16.1323155983527	14.4907767695942	10.4618822091106	12.0688210621966	13.3503559652578	12.1536251696997
RPF1	533.756319058522	0.487449827142499	0.00135509747561042	0.00685288818105051	4.85616496226834	4.97549061108374	4.96934648269345	5.7834464767518	6.49448559504695	7.58741584642488	4.65562742174758	5.53170819600531	5.95385423079712	5.25444077412002
RPL10A	8487.06976770204	0.417209889879403	0.00562815315840601	0.0225011187878274	252.305352192182	244.577064969721	206.652934398518	211.800622056017	309.341857436019	288.399325338939	191.159765300169	217.019911870133	273.052165527472	229.48897970696
RPL11	7012.98538559616	0.650901070569993	2.04079077399241e-05	0.000182985713216144	218.303541915324	196.910857532417	189.546004618747	195.72387978499	272.405307783973	341.739726500882	189.721243635891	191.909714406065	251.455170122925	204.441339706786
RPL12	7950.72181630654	0.429447224412687	0.00708988509914839	0.0272863009091078	253.413500788845	238.790183236587	215.401091857154	223.678129996893	270.903978737199	342.006865583614	174.410385603701	211.386492796582	284.757199074189	235.00903843688
RPL18	9080.60967832042	0.403880915780068	0.00188657134728232	0.00906637452480493	205.884762346066	197.886164341355	203.204439739978	190.353054247146	282.242640372484	233.387405633522	178.345210818511	164.387634058891	214.729740915177	228.427013044081
RPL19	18914.8090407182	0.464111943226535	9.97661115062387e-05	0.000726955797613077	337.718217952304	334.252692076761	309.208671753069	301.512613217329	419.091202723773	445.749480186428	305.842081782436	316.840202281664	386.224712998914	339.333644548887
RPL21P44	119.242974368858	0.970470070424656	3.54844155115088e-05	0.000297572544929687	0.99927127966059	0.913346251255312	1.16062838254238	1.29986449440756	1.92996609764904	2.25682822203178	1.01222252518405	1.29719100970242	1.91396577431725	1.80184992230211
RPL23	15684.9425410525	0.523949588163663	2.10761619106737e-05	0.000188402281432856	526.591649357272	543.976509984015	465.284131243525	510.511600696318	694.839616441702	742.966114647148	446.070173477861	497.205630175532	640.652685975455	513.853301244379
RPL23A	10337.9678311841	0.326597314141039	0.0115444391903011	0.0404079966759744	218.720744934488	231.632026182433	197.642521835304	199.394451222365	261.266575317903	258.187021156369	201.115688780101	209.928527368495	238.097482431143	206.819783032333
RPL23AP53	210.899446016177	0.561853092666329	0.00502093433867419	0.0204635304448533	0.70839839576768	0.684298374711172	0.561641469263183	0.758253669728888	1.04729172492806	0.911358628109098	0.636716706249505	0.678773161696074	1.01928736754225	0.962063864831843
RPL24	8234.72560997349	0.367927113499696	0.000340208000093248	0.00211358418675703	294.494420919896	294.391023837409	271.530868753342	292.282450950206	353.780362504239	372.95066674405	246.332574111531	276.369641857904	306.982070421157	259.370457103813
RPL26	6688.19379017023	0.675729750489727	4.61710247279423e-06	4.87702209041736e-05	131.469470125166	134.811608117196	112.56244120506	123.331817842892	180.257210507971	211.730411869059	116.272113820159	135.482155071705	164.143554673666	141.2714554406
RPL27	5128.46589893784	0.506256224013146	0.000155255749905329	0.00107525591886085	197.079299981792	196.501183821408	200.633138603984	198.063832326344	244.497802234195	305.028400163078	184.416235861904	196.784758614721	269.540927083854	207.447100268842
RPL27A	5044.46596570288	0.412591389430645	0.000251459700603525	0.00163184842170663	21.2944771138874	19.4572487434402	20.5867833124496	18.984254091198	26.5379043662541	25.7181942718101	21.5952434712288	18.1343218615718	23.8028113276966	24.9478832744704
RPL29	4847.90390989496	0.349186854886183	0.000342019122483101	0.00212333859021486	138.024582740185	136.30413508695	143.330491176488	133.906430833701	176.845361209704	166.449993905794	155.631702562464	131.125747671076	149.772942641862	174.846380274387
RPL30	4532.89420673152	0.812244127193446	0.000656471091384919	0.00369023583024718	171.351575857756	163.483956965322	111.077750801481	116.857728848077	232.052442740729	251.680068201375	152.268754531091	160.580724642934	208.643325354562	169.044756347988
RPL31	11807.441045073	0.621864946075237	2.95806284440202e-13	1.09491826167057e-11	144.927127302434	148.426673937859	143.40138102911	146.499888053523	216.044609191757	222.398239818108	134.323682407684	159.880331540699	201.373832049108	167.709044564432
RPL32	10934.3398589628	0.603990869950349	6.40417117188453e-05	0.000495760509127564	105.178338855547	119.756590842047	100.275744987648	107.31956426418	144.151004232215	176.97997668975	104.433815202408	119.139549258051	146.657280968034	123.940971902621
RPL32P3	265.170672162793	0.857791643627894	1.22074439759164e-05	0.0001165129769294	2.41809230178878	2.38741349778678	1.93212525581716	1.91741626286001	3.69709796581261	3.96639564199186	1.93217641288679	2.17447851661651	3.29448490292752	3.14105080591379
RPL34	4192.65205322919	0.479370271093554	1.16765000482927e-05	0.000112113490109466	62.8766818449903	64.5487238281053	57.316457692581	62.3527167108026	85.2576398536953	83.0600231762336	42.890929995617	52.5428956864812	70.7304202576312	54.4363094807039
RPL34-AS1	13.3194595089804	1.74190939000047	0.00275822742492727	0.0123846098368485	0.0425239853332373	0.0664400787881293	0.0329270241365853	0.0304769853398079	0.134954905466797	0.14266089723155	0.068373215134919	0.04279221570601	0.107099021586952	0.10733538586891
RPL35	4625.45768833124	0.381055158108216	0.000538580243165705	0.0031155811028741	203.92537401861	197.055034095584	202.959993573051	184.066790944053	255.06682499385	246.476075707037	164.196864090978	175.377601274134	212.100497194926	200.177198749157
RPL35A	9382.22101437567	0.600652727368833	0.000387380193837955	0.00235922973910506	335.683359743076	347.900386612188	267.098669399989	283.668602830956	443.644495354001	471.665591134763	258.103994596564	318.609726980307	413.843360172154	332.21287194225
RPL37	10958.0453879739	0.521659505658012	1.51960967301608e-07	2.27387855551379e-06	136.734222633225	125.514843193675	135.21950500811	128.405126683923	184.121986077199	184.749881862688	116.310460162745	113.18991689887	158.854153078879	122.734292040418
RPL37A	12392.6755500869	0.477234741105996	2.0897722254267e-06	2.42873989708397e-05	570.421339808166	576.320476062619	565.689163001986	549.960542231542	736.746056687328	801.87798199849	462.86867351205	562.689233513665	696.707601215704	563.018939652187
RPL38	5018.5274912471	0.502963161174056	2.2555993621009e-07	3.23100854966307e-06	241.119265392159	245.242788321758	231.353503339682	252.371026478225	327.271268878043	344.156575090364	254.681679725681	238.658724692039	311.000832573041	257.630082816447
RPL4	42071.0072517961	0.496680619271778	1.96733405516699e-05	0.000177301579120139	562.818543461707	588.076606227038	521.950933911172	542.350633478378	729.628030360586	797.625222249928	486.622871740488	571.385727922602	674.801666737151	590.760393270354
RPL5	17560.003342314	0.611360463912364	9.69027368623011e-06	9.4851628932049e-05	332.488240415934	336.750347153872	277.647975764779	302.214999149821	463.818935657003	469.011506345448	269.41056179665	329.53947736775	407.572826697021	341.367422001311
RPL6	10728.1311325737	0.510628083396599	0.000947358038386673	0.00506416907716468	118.712298265307	126.827124620979	98.0385484714537	114.642984953914	151.937176089429	167.094755712401	96.5807029236835	127.665182519448	149.390239640877	126.855598462839
RPL7	16303.3143506982	0.553895438353455	0.000285847704892755	0.00181949086434445	385.59139938595	404.559624904528	317.782879911789	344.923202690243	531.230126414422	511.610250578232	333.021383549254	389.909717667708	452.02439532791	383.505887307589
RPL8	19904.4363222205	0.370677749746148	0.000418694286658279	0.00252308191290071	359.584781015133	345.60345686833	353.168082992012	325.973654056928	431.702071835874	442.992385563552	312.240869165685	302.176503277476	362.335158857965	363.627602559793
RPL9	14206.3212870437	0.640070494594187	1.39851704448469e-06	1.68886030204083e-05	295.354270592239	293.13068286001	255.45289939976	295.440188466918	405.460531644555	461.965574395613	214.089653389453	279.950323731607	354.698964735979	304.067183915759
RPRD1B	1367.49454637493	0.770775898178634	2.099775712758e-09	4.46810969602454e-08	6.32140250279338	6.50002920807547	5.5453816961014	6.30087140236193	10.0444277936253	10.5149673336418	4.30207377502326	4.70725178881187	6.86693368694477	6.30814560470167
RPS11	8755.33442117787	0.485511078249766	0.00234072116366204	0.0108443771187382	278.139828579182	280.86848052368	231.575905169377	240.481483503507	325.644097806156	380.047914711991	270.494229356093	290.446879479349	355.919724778123	300.480272355338
RPS12	14099.7465528014	0.443043836530326	0.011060378163728	0.0389901566359992	632.59267670101	564.200867174281	469.519267574565	491.01120666322	721.71880136895	712.942450805667	446.450792212475	522.740528526635	647.740397199356	532.588262026575
RPS13	9603.66173270566	0.51659866540537	0.00112790216908978	0.00586062790144937	371.906933662086	377.818340429994	299.46809970926	319.500271485348	493.050816546511	464.470182131262	281.832647912026	349.02229937125	439.260593738706	357.033787572295
RPS15A	5703.47219183117	0.828081787218712	1.59786786442951e-07	2.37777313373171e-06	185.295738318405	199.619424726548	157.065209961743	177.955154817168	287.747717886011	336.793867202424	171.234862140573	212.333021670217	284.384775540035	231.528295678848
RPS16	12194.7478782464	0.43514086564729	0.000255367310353999	0.00165173151289541	353.314880114378	352.592406282108	317.368044597469	317.586605160964	442.6958573577	443.458407636286	296.872701603866	322.373409570822	381.83693021894	352.840024653216
RPS16P5	253.438831507423	0.963649473902712	5.75185303789699e-09	1.127273622633e-07	1.33787172644311	1.44469512168161	1.25230258892027	1.22587673996164	2.51836052852923	2.48847044101258	1.62209931954505	1.38607512791293	2.14965846165902	1.79533557706382
RPS18	11641.2751507642	0.486429054484682	4.90051879996598e-09	9.76722180278288e-08	78.2504234946197	76.8963500414679	75.9616250744123	78.9665443860062	105.64962245887	106.559573835226	76.3175104847004	72.1218526194438	91.767360081489	89.2439488381733
RPS19	24921.1890696484	0.336480202655754	0.00857146059525041	0.031813895982245	469.215986490071	460.971061406543	479.178665640227	443.59571594411	626.442584436962	517.01168063559	387.441757711564	425.301097085035	535.004991896797	485.962204390655
RPS20	17920.452617281	0.522218560902481	0.000784847520272516	0.00432132139365046	279.887942701337	277.60594747978	221.66445230334	241.977369921153	362.565462907534	354.542326206939	228.442183860183	257.046076639491	321.631159388492	285.644792460715
RPS21	9185.02088867932	0.440078332497619	0.00385746254432914	0.0164603130463878	485.515633839212	476.478900700332	426.608774750588	398.543727665501	631.399021050988	554.407352212278	408.037103505377	443.140601032139	518.218102020451	518.876026444352
RPS23	18757.8229260914	0.438761886986063	0.00931401570664759	0.0340959157979273	120.060592855427	121.4511969719	93.1190152610934	101.607746234272	141.786553000314	147.373325023974	85.232669731278	107.014164999602	123.16411074016	105.80375339408
RPS24	13499.0665468211	0.549729228095951	5.17773114238842e-05	0.000413537828638901	90.1340805017132	86.2225427117633	76.4401921396761	87.7498225325448	113.367755103692	130.178130373333	80.9911088025952	87.3594174612867	108.838183868829	87.9220605076652
RPS25	5534.95123959171	0.712343122396582	9.48959176376946e-06	9.30941632994734e-05	216.610753131321	223.568388842133	174.458472495781	186.692318730949	317.975104525512	324.008140746764	165.651589913831	192.511100322672	260.803283945082	225.273283548936
RPS26	3095.27854758654	0.555498982111708	0.00175720206184474	0.00852426848228043	91.5398133449641	97.0368066842368	73.0768388553467	76.6035749420874	126.460727626475	116.68078317778	76.5432629466456	81.7270736023486	104.102149126449	80.9433240594472
RPS27	5210.05908944234	0.822743322040165	1.26436230900654e-05	0.000120090563462998	276.800991392706	267.104638342128	231.242144018974	243.793379531282	367.22652379083	513.478156210437	245.057784453908	258.154275345576	373.058738938562	285.488178541198
RPS4X	19989.6371587757	0.709894426380741	0.000475923997935624	0.00281008878003612	307.180088798017	312.24671473041	414.30713418516	458.415042759206	575.102941947954	614.584321181332	379.653112331714	457.38085748231	553.608594052516	468.306927020497
RPS5	14288.0562766677	0.454387054106833	0.000829952179148031	0.00453326686443892	379.274830166626	394.928453870729	364.84906109159	341.296362664622	534.773352588232	456.874137871198	328.918209474885	324.265807456656	421.044164888488	402.175460673171
RPS6	31760.3236779623	0.604166755596987	9.09688766149203e-07	1.14977090177782e-05	748.024345114362	741.391246630556	652.988512482598	673.524109394418	1046.53589613249	1045.87274754182	542.928442946503	647.096871447121	874.6311425427	713.777030581427
RPS6KA2	201.719916266808	1.44961229691261	3.52689236954056e-16	1.70715155656415e-14	0.413880218942325	0.377713482352798	0.442509200168095	0.462622424991645	1.07739137861154	1.18840826523011	0.35980563465795	0.501995616958746	1.18044396686713	1.13245825229732
RPS7	7038.94104809534	0.379667374757745	0.00134999900941764	0.00683298837889383	196.733674478778	198.476702902543	179.496025940238	183.277942425265	230.512062040541	251.384961794749	164.219314058857	204.972975940979	235.512499126791	197.099182116928
RRAGB	406.711898580495	0.579274088084434	0.000140712818111152	0.000984989726778066	3.74795098682521	3.27120000784197	3.13351783193553	3.49085074809034	5.07569863306612	4.89725966031407	3.3981054199802	3.2676293612862	4.86109939025057	4.690625058091
RRNAD1	304.708230346869	0.639251691062013	0.0011239842869267	0.0058466001525223	2.62415948705791	2.20959380579649	2.67375223929261	2.25519617588177	4.19966104896652	3.24521412634793	2.40382023699549	2.15051996090235	3.4104099831516	3.703508385117
RRP15	467.465347290595	0.76036788366391	1.45129683509813e-06	1.74185278866444e-05	1.05755331733828	0.938713414295136	1.01249928335237	1.20844456283354	1.67865540243952	1.81197660880985	1.05992561073874	1.20042630759038	1.35457522198677	1.00970505222826
RRP1B	2746.52880552118	1.04133293633069	1.75366674255493e-07	2.5942782818703e-06	9.5881012355692	10.0971117944041	7.37131125103028	7.33519687742528	17.287890525328	17.3402747304758	9.5918198852021	9.51457245176106	11.6292484129594	11.3842395825291
RRP7BP	417.508148264329	0.359085050238543	0.0130700062956929	0.0446279924270957	3.43300597348819	3.49607637208284	3.87112663177581	3.41758289642849	4.69024624825537	4.22054995899147	3.42117013640332	2.92019508044322	3.46333310780841	3.9780713936085
RSL24D1	1017.72984605828	0.494807886815264	0.00625486316700182	0.0245717801871583	11.5094885589388	11.4192272903304	13.5928888005334	16.0293356106021	18.650193789274	17.4815598111215	12.2218398539354	14.6633367994241	16.0893158760693	15.0869521705542
RUBCNL	20.2549608051867	1.26418666499942	0.00635518344477568	0.0248992610881705	0.0843168901378476	0.0564591029882009	0.0699513862991759	0.056113575598057	0.18021343119654	0.135777187631801	0.0290509167459515	0.0404041616263202	0.218424112674362	0.205224532542262
RXRB	1259.77689514883	0.425849428128547	0.00761214375732533	0.02884886230594	1.48837235998162	1.45202462569699	1.21421083301593	1.22651410391444	1.76195018158163	1.77260079910473	1.25150166863604	1.2620020126393	1.45367820211812	1.3990246662558
RYR2	55.190913369063	0.902195866460568	0.00369717434212466	0.0158956844152988	0.0566455228057156	0.0413584923081303	0.060731396061026	0.0667523265522398	0.0933427787949081	0.113144693215763	0.0574247268818756	0.0570028282082787	0.0901258063448599	0.0989859849394187
SACM1L	1223.97026714698	0.460030866721729	0.000240325847340862	0.00156884072037741	6.31598586596654	6.57658304746997	5.65096314027118	6.25329093454701	8.46239161916011	8.20259226522789	6.35802256575747	7.37958260649093	7.78276564222666	7.09511182211499
SALL1	566.296332963395	2.65786668503535	4.70786007558907e-35	1.31826811373449e-32	0.691794015459355	0.720232766030079	0.903938959072037	0.979700509896272	4.39701210281707	5.74813013342827	1.05884087602408	1.13125622081812	2.66876774982164	2.48860271146863
SARM1	111.398131258143	1.0667373051638	7.61687061035604e-06	7.64555347442522e-05	0.271142362131418	0.257616899082912	0.238321631809086	0.196954072497765	0.518294887698462	0.469077943959921	0.265112504149133	0.287601450830924	0.603524559068035	0.554914237987663
SARS	4874.95094220902	0.57713046337327	7.80208524645722e-08	1.23397612169955e-06	17.7333628634161	17.5576176296325	18.4091699245235	19.3507861651213	25.1237050346821	28.0851879826198	16.68070941551	18.175016268053	23.6042554611344	22.1407557970342
SAV1	2460.11115167273	0.759948437130536	0.00224152968521506	0.010445255626502	10.3295572508895	10.9816460413955	16.5723987284985	17.1636384154621	22.4559778182712	22.9629996001661	10.2369897104782	11.691196933776	17.946451091511	16.4952784359741
SAXO2	20.0763222545236	2.48986619414664	0.000121611281143712	0.000865724914129721	0.0512597433425892	0.112124531685194	0.0330760548635081	0.0244919415733962	0.333104349734179	0.261391226577333	0.111854647954745	0.0687774355095956	0.245290976373925	0.194078152180542
SBNO1	4995.7910273726	0.60011658083796	0.000117926451281577	0.000840852345257024	7.1626192845631	7.94655833265237	8.70763214380838	9.73169377214041	11.815422209373	12.9895988336654	7.05616748188773	8.26152329777523	10.4489413139685	9.5195825570783
SCAF4	2021.49779212455	0.377887517421823	0.00660538896003929	0.0257592625247747	9.11185598285178	9.24262892432	9.31243191884461	9.49941955937743	10.4337202282822	13.1431663345382	9.43126740016645	9.28279224793825	10.5919577618372	10.3758011104173
SCAMP3	944.763327194241	0.395311532966024	0.000952887484179844	0.00508909505418753	5.42634816955843	5.75667357720152	6.33549527718286	5.96161434700907	7.48075415873677	7.59452745378364	5.56782837306541	5.19239741205421	5.80935887462792	6.14259306425
SCAND2P	430.073068810785	0.655975670129957	2.99841990249518e-07	4.17952217263153e-06	1.72774425325712	1.71788935319787	1.67610285556952	1.78515781727582	2.60806066478913	2.70741338211914	1.23416003695186	1.38056961043333	2.097045872183	1.6840336447247
SCARNA10	8534.61340371086	0.469915385556275	0.000741278627028082	0.00410710318541125	558.417258080215	490.114287336555	463.931160265598	463.849727193348	670.536943302326	667.833322417756	484.284064139875	553.839678182224	629.882189652819	560.600868777793
SCARNA9	70.2072718847708	1.01237341431035	0.00501185932406481	0.0204359984796801	3.9896118150211	3.55068579699167	2.87414987785622	2.38883158179046	4.73947864892883	7.86804350343891	6.42059354645854	5.69183611714916	5.83804958380343	4.94748094032478
SCD5	1067.85667052485	0.462549399976428	0.0114454223880754	0.0401307257821891	3.97723932108077	4.24413622155458	5.40062496178453	5.46740958184644	6.69133072855341	6.14222605903058	6.3338691809032	6.97273831274379	8.42705558604563	7.50960566292279
SCEL	1194.52306240918	1.8697954005882	3.0837392518944e-17	1.68734167326483e-15	3.48693018164614	3.64439484496311	4.25536877199029	5.60215203259614	14.1828569607295	16.0843837850425	2.54179440734439	2.68035146352311	10.6344647418471	9.65836100816533
SCFD2	794.050452253472	0.471525244618068	7.71314121760296e-05	0.000583252511214363	4.59435592206697	4.98355643654263	4.82087146963671	4.73387407575523	6.21068937827017	6.73587584496353	3.9999731061547	3.67379995127789	4.50043821947751	4.0031930975005
SCGB1B2P	85.989988608661	1.159121775822	0.00248785951155838	0.0113853498010772	0.906605360112994	0.747744912142998	0.48599965600914	0.42172249029497	1.55322427385575	1.25286823012816	0.630738730327749	0.54388545782364	0.849664457860417	0.891146136418233
SCNN1D	55.1926912408217	1.09862397242155	0.00248655168555788	0.0113823211607805	0.326886699159174	0.2380377898088	0.284752990986036	0.276115765675191	0.770120860349326	0.415943868369662	0.524922262167937	0.211466967725967	0.496174617445445	0.828782766215203
SCRN3	233.340272319562	0.890378061212062	0.00327512244002239	0.014340055236271	1.55905958106181	1.60112320233162	0.929141374780275	1.03577327428599	2.05697562594937	2.58815932457848	1.44853572057863	1.90970210372683	2.12432294974894	2.09750720507491
SCYL3	329.581948604167	0.43493042142233	0.00450577109360045	0.0187322276777127	2.14178007202486	2.04569174713206	1.91097763866531	2.14116119721761	2.88952670651447	2.55882461720793	1.59919813352806	2.16109927703888	1.89087519173167	2.27045146159935
SDAD1	2303.05297361372	0.508083156440673	3.03401134762457e-05	0.000260381129731112	12.9567368438631	14.7871192660115	13.5747155448362	14.8429529806581	18.5366910408709	20.4483144119932	13.3865790060666	16.1882709992279	16.2532098468683	15.6726131950284
SDE2	962.115375302364	0.962379904308236	2.63462965733774e-15	1.17517822614262e-13	3.72637208511435	3.87053979268276	3.90457506123332	4.24028575141155	7.89883981249389	7.08370532871907	3.02896412935126	3.35609524109869	5.56888865470897	4.91194262389752
[truncated: 661 more rows]
