# Supplementary material for: Integrated analysis of H2A.Z isoforms function reveals a complex interplay in gene regulation
Source: eLife. 2020 Feb 28;9:e53375. doi: 10.7554/eLife.53375 (PMC7048395; doi:10.7554/eLife.53375)
Supplement: Supplementary file 7. [file elife-53375-supp7.xlsx]

## Sheet: 201901_ListC3_4_DnZ1_withRPKM (
Table S7- Genes down-regulated upon H2A.Z.1 depletion in U2OS cells
Gene name	baseMean	Log2 Fold Change	pvalue	padj	si.Ctrl.n1 (RPKM)	si.Ctrl.n2 (RPKM)	si.Ctrl2.n1 (RPKM)	si.Ctrl2.n2 (RPKM)	si.Z1.n1 (RPKM)	si.Z1.n2 (RPKM)	si.Z2.n1 (RPKM)	si.Z2.n2 (RPKM)	si.Z1_2.n1 (RPKM)	si.Z1_2.n2 (RPKM)
AADACP1	102.107962560823	-0.93168428076255	0.00223056740892951	0.0103996737702908	1.70110236957706	2.17812123614992	2.12035730448518	2.14100230914685	0.73361444732804	1.33625338154759	4.61736680967572	3.88293710288754	1.4733884093899	1.59052993025384
AAK1	6014.18933257427	-0.376705763845089	0.00145612702557536	0.00726990707384876	6.70828361309277	6.95746070403689	6.15374828956474	6.60611528714169	4.73079613761827	5.21224592886129	6.73633879222492	7.3579996887334	5.35485740232896	5.23836463760237
AAMDC	110.708670431119	-0.772407951136556	0.000623904261715834	0.00353458816307758	2.50075220392435	2.0975552552335	2.20814548383289	2.27966933615379	1.35257511489446	1.25402556630285	2.23718954788464	2.00144782251331	1.75688960194596	1.30811699577799
AASS	447.825964494065	-0.767577995087389	1.9357276251294e-07	2.83268978630855e-06	1.830979522462	1.76341656159979	1.9079773797317	2.134878821307	1.09856495863263	1.09283836106886	1.48140801533337	1.7050267162739	1.5830260593245	1.47442868040072
ABAT	411.261085847978	-0.457897424570526	0.0097610591272062	0.0353069391833804	1.73460013254918	1.80505369600793	1.41063517355829	1.62885867077842	1.10807915045697	1.23082625714214	2.08503139499418	2.25075027571537	2.1635221447235	2.02744303509289
ABCA13	479.858765201365	-2.0115381916422	9.3588655955853e-09	1.75793020179763e-07	0.980360489382097	1.10868015085769	0.5542702955363	0.562100321096136	0.200364264327624	0.18919272428643	0.950066991985019	1.07319322040413	0.53026698792439	0.506691854864585
ABCB1	520.600532366977	-0.649787819915867	0.000372276289916969	0.00227861990378071	2.51377327255754	2.36539219007819	2.70454961243565	3.26730602249168	1.59383765581333	1.78050237870491	1.83249930313521	2.27476458051899	1.41806621497186	1.58328086846112
ABCB10	494.512867983808	-1.03063293319751	1.62592471483675e-12	5.41534358236461e-11	3.25387807594452	3.43813540924466	3.07067905550585	3.57261989581806	1.6659133974894	1.52392907767194	3.42542362466764	3.69765646120262	1.87008303365028	1.76527506040371
ABCB9	433.95088686856	-0.817879329917711	3.31485273704315e-06	3.6389028270382e-05	2.81838981090089	2.65492107313357	2.98215876796753	2.73574799409052	1.78021481976423	1.32740399310686	4.78459457688503	3.74025324279873	2.04161448371438	2.5447002026921
ABCC4	1156.04329719448	-1.20067968424891	4.00921894744052e-10	9.54573359931819e-09	5.34667714336206	5.64576610957063	4.08824261711346	4.51515686496815	2.02025231669736	2.14788334100015	4.86473515818604	5.35176821505811	2.40580301597676	2.25435791373639
ABCC6	27.6880300364973	-1.57432215175878	0.000425085822827967	0.00255442943806478	0.0671028844258906	0.076385249929188	0.0593815675771459	0.0721390625389556	0.023903556028937	0.0212255071439363	0.104039669579514	0.0868193385152047	0.0488899642771303	0.0521736503535475
ABCC9	152.394201501183	-2.20424834363777	1.03628843781112e-21	8.7360602802843e-20	0.522464654694864	0.515457865806718	0.51384757413812	0.552617159608667	0.0974231307643786	0.124673688005092	0.757793707710177	0.930680402689179	0.131320334818107	0.125627875037688
ABCG1	59.7862365306672	-1.20701894711145	0.000340056409298814	0.002113387610383	0.469782237106454	0.528475997568336	0.419281430000719	0.345553780381932	0.174873605659888	0.197088107111269	0.127784892363805	0.159240590398546	0.134508052742603	0.280843558171565
ABCG2	73.8172893343789	-1.20781269057774	0.000206508315304984	0.00137352586159249	0.41945881480341	0.521368977090201	0.330593778610559	0.37846738706537	0.15281658413152	0.194497153831508	0.251623486581081	0.399491903945617	0.165538862704362	0.23396746427087
ABHD12	971.457452880967	-0.593174716811629	6.98194958356427e-07	9.05853974321199e-06	9.6713876046958	9.93979953993517	10.3055713038023	9.25259027096494	6.40616923927642	6.27783449811715	9.89731356911015	9.65798556415921	7.22357802741198	7.42218795350896
ABHD2	3571.96743422985	-1.06566636534803	1.07196230365131e-12	3.68165766628313e-11	10.83712930483	11.1327237538315	8.85310504713582	10.0157975532776	4.69911414513259	4.83744061273412	10.3986204907531	11.2217305447058	6.78267496715346	6.27440732946465
ABHD4	642.721490644672	-1.10420998719819	0.00345391919990797	0.0149703818900808	9.12310383572024	8.93210462484037	4.43986383633765	4.30046378250529	2.84120686192393	3.2694602528819	7.7554683306803	8.17964457545899	5.27452009830926	5.00369419584906
ABHD5	733.114810313352	-0.83959191200874	3.01931914635502e-08	5.17988160074285e-07	3.17042847878684	3.76977631048809	3.22981218712952	3.69479217227356	1.78012907156829	1.99899124925504	2.96725448062356	3.27420894144558	1.68337133726524	1.55563748342796
ABI3	118.009430969928	-2.65616158266671	6.18237005573152e-08	1.00208995411163e-06	1.03124417010701	0.962776282535636	2.58206520655204	2.16275805543928	0.275924870731544	0.24501146640325	1.17077378765639	0.935675321872679	0.19160009883716	0.348041604896234
ABL1	3711.86076190043	-0.338229314261991	0.000873850235569341	0.00473734378476807	13.5035465331299	13.6504014604437	15.0277227224387	13.7973891777239	10.893762372389	10.7336936712352	16.6743789162577	15.2858558466931	10.9001691761824	11.5528868839461
ABLIM1	6156.09875556258	-1.15953071750498	1.98606858602649e-07	2.88955759018998e-06	21.1109750686636	23.0629963466406	15.2401944509379	16.0327049836892	8.07760850894764	8.44970674463579	19.8575023156985	23.8637343416724	15.8725747531814	14.3492802579404
ABLIM3	615.378101964737	-1.94112985638071	1.49456086419394e-10	3.78887307427812e-09	2.74774277624128	2.69737058879566	4.4645665844722	4.7773022720023	0.805879452115811	1.05549860739589	3.53297355733037	3.71160988181093	1.31365270506948	1.44589365643091
ABR	2967.79151797605	-0.628947990607035	0.00710735742938313	0.0273236129858303	2.62332653985964	2.47873963515587	3.91513324564743	3.7977045595948	2.1188268878973	1.92127180973555	3.10356093970944	3.07287316537849	2.30928373617302	2.37235124416366
ABT1	251.285828923489	-0.608422640514251	0.000643969719962704	0.00363540611855908	2.89895530867226	2.59207908266112	2.79978646285203	2.52370896853398	1.87503630257116	1.5983668928463	2.44276378420601	2.23549459518705	1.67847782563286	1.6553388425415
ACACA	6513.66495350033	-0.601251355876958	7.89952243114774e-05	0.00059530233410775	7.34965233623036	7.70572611803775	6.26836219842661	6.51771469468575	4.2476550985516	4.72345886781741	6.74348596763612	7.37472970086903	5.27854273436718	5.06687609293235
ACADS	114.972982953485	-0.673475359338264	0.00278961874159759	0.0125000744171434	1.31545660895463	1.26119951188784	1.55763336085065	1.29480457290213	0.859736680953306	0.80468128586223	1.36852905089765	1.01430514419079	0.890651269218411	1.01874755972105
ACADSB	362.896456346269	-0.613623536073192	0.014754159796413	0.0490848832048717	1.62936556112198	1.84812568192584	1.12920682572566	1.34519134240921	0.889719536675057	1.01110532709001	1.43914051610694	1.63360397900835	1.34332116088866	1.09918273447143
ACAN	153.122352443982	-4.23496224081521	1.47303557999628e-12	4.9435074064675e-11	0.280311419508048	0.275065684105864	0.843214900909523	0.797816685008504	0.0274286176646317	0.0292267637242338	0.293908143497665	0.342960030745765	0.0617097535525136	0.0515382875841427
ACAP3	521.201307155635	-0.825074658351744	0.000977625883089383	0.00519526229560573	3.14426729292979	2.9742637430528	4.53881961264011	3.34965905632799	2.28342694799127	1.58084213897611	3.72061062581943	2.42915108031441	2.08008437708446	3.05698474562819
ACAT1	652.981989726779	-1.42119403304445	9.62548359348768e-24	9.85996485079415e-22	7.85256778415943	8.44600665489282	8.00474626722528	9.09751103881814	2.87463223895512	3.2083700421926	7.21866078553305	7.52380775401459	4.6108060992026	4.60200466912951
ACHE	71.1036743688176	-1.41993834613385	0.0127703168604339	0.0438255186528992	0.392817879060873	0.316800332904629	1.06681530939223	0.745234385528809	0.314282540706863	0.146512648999967	0.955363913356354	0.575503994959991	0.34044717497203	0.549526481067474
ACLY	10088.6513591861	-0.380909393883548	0.00220814242214295	0.0103196979670389	54.2399418791997	58.3061129840575	52.4061888739073	50.9325172920143	38.4986796827106	42.5137584751821	54.5543216820927	58.1461478047385	39.5945573074857	38.8558135127452
ACO2	1914.00782639348	-0.389220741861058	0.000390963782934404	0.00237776696289999	15.4596052967813	15.675403400098	17.5480236520991	16.7667042635081	12.0040279485882	12.3950907547876	15.2131900352651	14.9877181230125	12.3908468953004	13.5835530009457
ACOT1	63.4818172829385	-0.779578561787081	0.0105962764817775	0.0376782634374243	1.14546535358823	0.891370541750086	0.968759061660452	0.956453863065879	0.665541804543678	0.470095690178724	0.689703611186301	0.861720198178812	0.554576505667283	0.552642482100705
ACOT7	671.049081674645	-1.19962533844264	3.32273525595744e-09	6.82322523015317e-08	6.66367127200771	6.21187203944856	9.01374414329774	8.00611736819597	3.40004639397407	2.95603411307696	8.72350927274652	6.93848879538201	3.12070365251472	3.95186796932574
ACOT9	967.274887558603	-0.327413828230082	0.0082978338225308	0.0309876079099555	5.0546191513715	5.31338690952823	4.94811976601605	5.36317535645191	3.77335702204346	4.27028369017534	4.66301854094465	4.6598657890434	4.43177531776948	3.72272531939396
ACOX1	2390.88357458189	-0.42316419940353	0.000886934229693968	0.00479499668394539	6.40474822451847	6.789471028572	7.4389534891255	7.87321864608459	5.08461984661283	5.29012053774771	4.83942179062043	5.04235362185975	4.47678374947599	4.15668688533047
ACP6	362.650040260969	-1.2368961092756	2.2860666459572e-06	2.61546806721558e-05	2.55707726114897	2.62664058784985	3.9459318459276	4.03575123723783	1.29086571327193	1.43097829487839	1.54960739462782	1.59988971225116	0.945467547741009	0.95270391675265
ACSF2	353.587060656803	-0.532876192530567	0.000707624184220951	0.00394295714794084	3.25798714344522	3.2782614799436	3.69865069273629	3.8108511318193	2.24063744037942	2.49589006330946	3.33715728928211	3.74478571271271	2.76724608095283	3.00725057586681
ACSL1	660.869464892775	-0.671647999718911	0.000919147115679917	0.00494034564709105	3.68341969988658	4.05377073675434	2.81138795317185	3.16385228171325	2.11131538697359	2.09720361920846	2.80108902514412	3.37381138599639	2.10434109817731	2.01186099123762
ACSL3	3595.42353346873	-0.542423672555998	0.000715388611732351	0.00397867170142433	21.4978654092348	21.6591670778345	16.7648498341269	19.4637785419302	13.2826964822545	13.3645369699088	22.6856950149055	28.2769465527586	17.1928225401162	17.1100444176257
ACSL4	1496.16202732998	-0.610957678499178	1.93175896963118e-07	2.82923202709325e-06	6.53312395304676	6.64759248930557	6.59747068537994	7.50337474660389	4.4995645168054	4.22479942827412	7.17985841588946	8.05950895534576	5.38804649836183	5.13694148546263
ACTG1	21088.7347971123	-0.721088786079597	5.29129448781304e-09	1.04867623825397e-07	260.494385554807	248.915927683022	247.857467677968	237.363070002238	159.038917292392	135.902229805955	270.883878319878	265.282247001529	164.618886448558	161.305182660355
ACTN4	5897.77075883732	-0.89839755221632	0.000115466642780394	0.000825652101926852	29.3509124540074	29.1159511848224	46.796288362502	41.2199882220577	19.7072286687697	18.6077298954955	32.5933024507094	28.120236839307	20.2483873125683	23.4978269003039
ACTR1A	3371.64181280879	-0.90528290639816	1.51932893470805e-15	6.88150552715197e-14	30.8761399772451	31.437324657682	29.0656897040009	28.4705820369255	15.5034986615165	15.7674643271251	28.2523812789354	31.9450799689638	18.3828257306291	15.7786449680683
ACTR1B	1898.9789661056	-0.615272206833439	4.97839880916125e-07	6.61995536744242e-06	20.0139256243943	20.3384792043518	21.9618851971708	19.7590745290491	13.9489462011423	12.2336053537945	16.4190796879839	15.8976239911136	16.6608844315628	17.1729368211184
ACTR3	5421.84854446768	-0.932030019744656	8.7363507725594e-07	1.10817684853653e-05	20.0155889391675	20.1233260996496	26.1381484778072	28.4622722924415	12.5213108779422	11.6932565986963	18.0850583737432	19.9252631834632	12.3059944521272	12.3133556318802
ACTR5	371.129127140895	-0.390296101897573	0.00679645486731105	0.0263514902085333	3.21446907391197	3.69090852370626	3.48295260737389	3.64899302166929	2.6017244340993	2.62290260116016	3.16648798305553	2.9669921671865	2.48579680468957	2.18497761015144
ADA	265.645231454612	-1.70978753861383	2.22973091234652e-16	1.10976352950941e-14	3.99333945479562	4.92346570499931	5.20962724972142	5.04340638978488	1.27615252713339	1.57539384952577	4.3405362020166	5.18148362833041	2.12676109709248	2.40438498117549
ADAM11	165.408018970294	-0.810291247793039	0.00106841173476004	0.00560749072229286	0.733555037871213	0.861476812676396	1.09075451283779	1.08758783960588	0.553682274376889	0.496517980158021	1.25399073595683	1.0707696606807	0.753718747386945	0.761104774014975
ADAM15	1099.33039267459	-0.805716559383267	8.19349267441819e-09	1.56235008041747e-07	8.32516717494239	7.70191866137639	8.68377817020517	7.59545250863455	4.83663298615947	4.20043679427685	8.54597295222861	7.77515785015651	4.1305377615844	4.84191641954996
ADAM19	4806.14958343476	-0.784421062923471	7.70035973244162e-07	9.90311227196269e-06	19.7301117047329	20.667819270203	16.7731617571385	16.602377830352	10.2721580503857	10.671208167646	26.1539486237712	27.0396853157743	13.4148167990521	12.6574511940409
ADAM23	522.602012342944	-0.889640532157423	0.000533132840483662	0.00309498105979626	2.3135585769915	2.64528943374271	1.73599881141315	1.85000506151473	0.942458933466004	1.31063524080635	2.68733311641592	2.93324089653128	1.75561976525968	1.82941881723346
ADAMTS1	981.422648992126	-1.61475345502044	7.56405079971637e-15	3.25845992763332e-13	6.63481753559447	6.61864322521237	5.23984162019834	4.95296990453266	1.7151643618815	2.02758709594953	9.87293937762219	11.2974935487315	3.11903621657015	2.54688454490203
ADAMTS14	167.601280496016	-0.707398394014928	0.000654319074576808	0.00367968329874522	0.672837872415607	0.689320593852347	0.814976395660995	0.809446783982368	0.492433406857547	0.402437058134309	0.496762620745705	0.34176518022666	0.2396619712216	0.341180252698764
ADAMTS16	597.374457951986	-1.49501375039097	8.2580693291871e-17	4.27938010326316e-15	2.92281127132454	2.98174850356492	3.49877803893342	3.81219506497302	1.05717839448884	1.22857718732021	2.3472880565798	2.29604746322059	1.0027014093485	1.09340376155227
ADAMTS2	80.7077329361114	-1.75304973387779	4.46162170199877e-09	8.95322468878318e-08	0.350413875871852	0.323900635369835	0.298843860643077	0.276607443233562	0.0799897666491858	0.100623093985747	0.699070307651621	0.527703343104666	0.227731531908596	0.316605269676882
ADAMTS6	3752.01963500733	-1.64629098077365	2.36557529299249e-11	6.8326346044647e-10	16.0099159541142	17.3755800878635	10.6966969058335	11.9004395509727	4.11476289655534	4.6371357135251	13.3226207906362	15.349208720092	6.34325155505696	6.53625201064148
ADAMTSL4	88.4254241049128	-2.60526201697399	8.65069632459266e-14	3.34246970489031e-12	0.455552003187105	0.612240367817776	0.650854780165828	0.676103868806982	0.115148090982864	0.0779027864683331	0.562548281240658	0.559847080770668	0.13250173727928	0.188888251344868
ADAMTSL4-AS1	248.218091276284	-1.08563103894684	0.000511192528621332	0.0029823513780726	7.08950178301903	8.4204719313831	4.81665259945754	4.71724014643007	2.71490363880502	3.05498672171552	4.51771399192144	4.74460297954789	3.64690259554516	3.59142931948958
ADCK1	226.936315623289	-0.640777543987091	0.00132190443479981	0.00671199833911756	2.03486343125871	2.53595892132857	2.71564182227168	2.68515110116837	1.48694047812364	1.62875320551538	2.37549483702412	2.42511782638766	1.90827780623181	2.0847039951473
ADCY5	82.2525823004144	-1.04321693112697	0.000229089944891906	0.00150609542501884	0.310555051874188	0.420668592186339	0.314373179276462	0.324673820330086	0.151131376475283	0.172050364473274	0.429963384355707	0.389925666556452	0.18082737792124	0.234623539947629
ADCY7	2356.82419870362	-0.654067596907316	5.88809520860598e-07	7.73619310070312e-06	8.74558905816768	8.48400773638788	10.3792491190782	9.3713640378771	5.88753701813983	5.58882537103476	9.99283162255583	8.70051760875125	4.97687221291987	5.71356805744256
ADCY9	507.561878132196	-0.720031340183019	0.00718708354082281	0.0275820572654666	1.16278087396002	1.40473346288179	2.15979318463986	1.81058746282687	0.950797217381512	0.983593252413032	1.43320505614019	1.46960921876544	1.19232937396203	1.20216726085647
ADCYAP1R1	54.6745563729667	-2.48250156434931	0.00385647735526264	0.0164600955722802	0.089473914488484	0.045751194026028	0.40938849350453	0.451797165563999	0.0405651525735177	0.0458441606908894	0.176558879569311	0.171891286541662	0.0522390748563399	0.0577437848217771
ADGRA2	337.580089281948	-1.28188207482884	0.000512833503684076	0.00298906353164557	1.08131950020998	0.988754778085708	2.26821485544441	1.68654050601722	0.510334114678965	0.695794598771326	1.28259267834297	1.18625118612403	1.13845514478102	1.19549922420625
ADGRA3	1147.76285483971	-0.542077549284408	5.41065105217238e-05	0.000429802799315713	6.24159676089397	6.2463770276011	5.6490454323006	6.07638259670513	3.76418889709085	4.35604850707498	6.97603664921176	7.27869426388126	5.01234794581889	4.31179723652401
ADGRB2	1061.12414097571	-1.66655317152167	1.87440953289438e-14	7.75239942724555e-13	6.03299748478967	5.82919481330016	5.65217488265914	4.26631388318236	1.89874605783413	1.46042484984531	10.9340082745887	8.10902611157535	3.42431993555754	4.84352531858474
ADGRE1	69.0181758062799	-2.77588556022307	9.8922946802389e-10	2.21464218514777e-08	0.703408123468111	0.865474190319745	0.408495395207025	0.584873453710565	0.0896925943854542	0.0929178041130079	0.21584774851933	0.40369287504078	0.0747382136462831	0.0858265359070084
ADGRG1	494.140131255604	-3.06002491726768	7.27685989199986e-31	1.44057297120388e-28	3.89366113860957	3.03231963494301	2.46750796852222	2.60854064249655	0.352734865510964	0.35183168075632	4.56441625711914	4.06479715135352	0.752927678155597	0.802003404375001
ADGRL2	1393.47213410892	-0.945109555180155	2.67477979960364e-11	7.61339988517229e-10	5.74733107941378	6.25592528445985	5.17723120829143	5.73690504335063	2.7557703843492	3.05705928849601	9.26490994478972	10.1370658876523	5.7633966084006	5.14972204891145
ADGRL3	790.991184521491	-2.38262837957416	5.9449485973096e-27	8.24756293984235e-25	1.54504365264276	1.47572717220304	2.15085533403191	2.11766515612818	0.337968754460416	0.343694785476409	1.44634746384454	1.65117795162637	1.0289337094094	1.007158863307
ADGRL4	235.168365676311	-0.920472941291218	0.0103735044159575	0.0370431240990586	1.11818980818345	1.14983744864392	2.19700314239003	2.21358019053172	0.777187115170488	0.939983545843967	0.763743360549627	0.971575507424397	1.26730044373582	1.11203456290515
ADK	1355.72153384557	-0.479631903761213	0.000258602558001121	0.00167081718717336	11.8992847053087	12.6829506727443	13.6763994526772	14.7567713653386	9.21561068487103	9.33954276407393	11.5893300486151	13.746956895178	8.10985714781	8.48889668159642
ADORA1	218.61165905164	-1.18156814379362	7.66679718917484e-06	7.68817869528011e-05	1.74056008712104	1.84638094253294	2.54652761688785	1.81210161754244	1.01340238365714	0.700714747505182	2.62605614772389	2.82089980226021	1.24589293457627	1.44807855039241
ADORA2B	729.661886397872	-1.01009930891229	3.76491899634391e-09	7.66868298226398e-08	8.65342422316584	9.16272835529891	11.3029565223067	11.0719492425506	5.08091496877247	4.66015708485714	13.8126045780531	14.6561005589457	6.62398641964453	7.29118670788078
ADRA1B	392.119002597017	-1.13609522573807	0.0015326935362721	0.00761334294208574	5.77360680092094	6.10569880567519	3.51830024931898	2.88239401567031	2.30205686571623	1.77668640882631	6.90792428998992	7.7440473258695	3.4958517589741	3.16668555537705
AFAP1L1	955.062077113958	-1.72188025959041	9.99698419811128e-08	1.54506021567125e-06	3.00368017568631	3.00539782530368	5.74785610626958	5.57923788295127	1.31886892971526	1.24040504899363	4.32642136750205	4.16008114341265	1.73625024872065	1.85739100582182
AFF1	3402.99988832146	-0.617795423789676	0.000469107217919217	0.00277541976914664	9.3242432744499	9.50422388447251	7.34770167544933	7.96403773873457	5.02545767345216	5.85098445341599	7.67616282548712	8.32757948470427	5.94987777198825	6.11817633701902
AFG3L2	1659.20814912578	-0.917974124664028	1.08555197017589e-19	7.90344634815245e-18	12.5716734686055	13.3893053037297	13.1950679821181	13.7899209552043	6.77009056463661	6.91065568354351	11.3866971245188	12.1087079628167	7.66237096417409	6.78326023215412
AGAP1	1812.87674398734	-0.853408350832924	0.000751576832624104	0.0041563189623365	3.01900011314366	3.24622706270717	5.10217423903418	4.84392407142056	2.2056208804489	2.16686528600794	4.42711304818936	4.36531296823528	2.77103855269536	2.89917792167119
AGAP2	336.537441126659	-0.496807486884449	0.00853974334061553	0.0317275421047863	1.22985214261512	1.11586483376351	1.54407803817813	1.39770618607836	0.935943008155486	0.894741590075057	1.05632012748396	0.851593364527416	0.80312479668456	0.835662970059572
AGAP2-AS1	107.143931701676	-1.2082179832673	0.00244923916552972	0.0112377981399657	1.28084255989937	1.34262770842222	2.82656601045866	2.01538604132619	0.90272579156464	0.675021793134492	1.51649200936411	0.972550074626488	0.712624717706362	1.00847326354863
AGAP3	222.168883349678	-0.848751006419348	0.000500263791473465	0.0029302352865595	0.896755957085064	0.885378641080755	1.27424822848231	0.960640268107794	0.618499182344172	0.472393339467147	1.10112465134112	0.918412684216685	0.637914517438637	0.744973106891728
AGFG2	347.987841385191	-0.632816490562349	0.0147718259870988	0.0490902420461013	1.36731716132914	1.43810524144379	2.29392856238794	1.99576742566461	1.09869544115288	1.13223587619558	1.4822463172561	1.3461111291027	1.23467963919752	1.24687447229481
AGPAT4	767.771563636423	-0.566870978527271	0.000131956184659246	0.000929231022186755	2.43907927404724	2.32256942004514	2.42296899830952	2.24511277719653	1.39714325409984	1.71062565223711	2.36442110358271	2.3292365859391	2.09760889522854	1.86001825978461
AGTPBP1	1105.10791732615	-0.418709194505781	0.00514430349849222	0.0208794018290565	5.61242178234151	6.53895673154555	5.36913491419751	5.40874501524451	4.07053013611748	4.30702520600319	5.6185038040853	6.37504499674929	5.08778043022222	5.08562578108694
AHCY	5332.93146993709	-0.698027168688123	3.00167040309097e-13	1.10873020612285e-11	34.5066718462603	34.4779238518838	33.3731965707383	32.9145632808617	20.3052227996758	20.4373016468992	30.1959698029227	31.0444443452102	21.2248030873038	22.0725123944621
AHNAK	65531.326270774	-0.512382020473102	5.87803885160836e-06	6.05290277770238e-05	83.2339975417767	84.7947559805927	75.4204409399705	82.5201813168115	53.60999849321	58.0409494148651	72.282127637632	77.5153620586213	69.3509029400792	65.0768608353115
AHNAK2	19151.3251338816	-1.26027151531283	1.53671059347767e-19	1.10062211164565e-17	26.4412254148938	25.6549522853014	30.9821132458149	28.9655684599147	12.3862108823146	10.4542896181138	28.5648731283643	25.7148081258577	16.105364874005	18.5732104693855
AIDA	1099.48149969102	-2.38597824704704	2.64976749956064e-51	1.94526056561495e-48	9.84458396020645	10.4991392993986	11.0278383771238	11.8840506121505	1.79068907499955	2.24185287990289	9.58721671089092	12.3117367708529	3.70343678068216	3.59541183148724
AIM1	45.423901862382	-1.29016358335411	0.00274314083094882	0.0123262938792368	0.210368995888875	0.186130885268977	0.109814958072427	0.139760267232172	0.0546535754791946	0.0742230108545246	0.258978737305653	0.302082984060587	0.131265883147248	0.114104332156884
AIM1L	65.7683831145097	-1.66136530615097	0.00013478400742993	0.000945691583076326	0.445250133730788	0.454040984564788	0.264494927184987	0.233852513631207	0.0924571897637157	0.123148041621652	0.453199048765115	0.324928033822343	0.123266992090775	0.154423798239617
AIP	482.158692561963	-0.93242484462993	2.46359213904432e-06	2.79138455934545e-05	8.48430826732508	7.99441986680381	9.56532731897844	8.46574300766821	5.22839601311943	3.62095059947992	10.0812560219308	8.87583284251159	5.51280816130496	6.60594808401912
AK1	303.876413727221	-0.649083260895397	8.23615787786972e-05	0.000615145678890151	2.72797503221791	2.74566712467886	3.27490871404604	3.05396304678393	1.78328312807015	1.88997427420371	2.66671760429538	2.74518239775696	2.14904625686826	2.4019953195931
AK2	2275.87545389276	-0.498008804664532	0.000173073593304866	0.00117827806817559	9.69348896833422	10.12096191706	8.80463832707339	9.06607137196818	6.17201406772138	6.86465153400475	8.77745147901369	9.79504416883271	6.529351886629	5.95166554289518
AK4	1015.37277462022	-1.12123023928604	0.000132513398960919	0.000931293807854977	4.24371677755175	4.74192063082269	2.50244340122962	2.9902934518032	1.54753422967154	1.71038482169453	4.82434126714332	5.70778464239108	2.00286368934497	1.89042152690342
AKAP1	1431.16978166022	-0.591341120308643	0.00170886359242449	0.00833106464718513	6.24556547899288	6.46045149133082	8.6702523591162	8.49766397373188	4.81922694262445	4.85172215336728	5.36125022873369	5.71569883671957	4.45757999670401	4.10273057766735
AKAP12	3420.20786220822	-0.818493425567659	7.67977507952861e-09	1.47557205153996e-07	10.0075353395325	10.4736870279142	8.7241020038944	10.0239351387643	5.06120553503648	5.8044598778455	12.251549168916	12.7031125377075	5.58023790985497	5.19983077903122
AKAP13	3070.41737252746	-0.525577534609355	0.0135683181883492	0.045990803801563	4.44692317663662	4.50653688546655	6.33373146068222	6.43855360203479	3.41801781521351	3.93863900608201	4.42990945298789	4.99709738485276	4.06579324536766	3.93636118913194
AKNA	252.074895205378	-1.1880493046707	1.17983445909269e-11	3.55180426206316e-10	1.20291018720151	1.20041904876926	1.31076691642483	1.14023249124395	0.492590708822757	0.546753775698527	1.7046175501939	1.61399711409301	0.894219521686987	0.973324404898423
AKNAD1	15.3411455068454	-1.92939780717721	0.00354416412610523	0.0153163178164945	0.115260773464299	0.1466406997563	0.121122720611627	0.159314499874362	0.0149303559208956	0.0530304990398659	0.0453856686671445	0.143603953760542	0.0373230857556254	0.0389640173648588
AKR1B1	1991.60080632409	-0.856025567875426	0.00220142607634214	0.0103019723875358	29.4433572772237	29.9408204654709	17.83201803438	18.5364361274746	13.068432675673	12.8425048363987	15.8692802470036	16.8480745142026	14.7498564300254	14.3397065640746
AKR1B10	33.6707009875147	-2.51611718144059	0.000394267780227948	0.00239620697476241	1.01645173324072	0.84816005842425	0.272442241375738	0.360243313556063	0.106346043927783	0.107921717344289	0.969820077834772	1.23642810390318	0.202548675913569	0.174449425114245
AKR7A2	644.152172263041	-0.704648864262587	0.000835456741791302	0.00456148507394514	4.96215453594756	5.34091473216218	7.52643797175157	6.57125619110421	3.78655261105521	3.51851995309638	5.35419186919167	4.90440801743173	4.62097519015072	4.17501454518966
ALDH18A1	2945.65498842254	-0.551505515219412	3.44244939889308e-08	5.77755335205747e-07	18.5171990313871	19.4440299789914	18.3610609897097	19.0785470250754	12.1459534211998	12.977607974795	17.5910085717047	19.4474840762154	13.3355421695307	13.041453963578
ALDH1B1	1679.54969433008	-0.569824668447304	4.90696840200205e-07	6.5348356972694e-06	13.3847668225339	13.9628694960136	12.7201241400107	12.8910781565609	8.87736591839112	8.55604781251673	12.3584140928255	12.5576134334603	9.45715932148467	9.23398982470286
ALDH3B1	567.48380361018	-2.30563622608425	7.45534130915032e-28	1.12269793611897e-25	5.81094493774138	6.12209601970147	5.71571957250057	4.67406346288137	1.26717456965607	0.944884462959567	5.08660071644261	4.75380341032167	1.78690681122544	2.32335713111496
ALDH4A1	356.698085709353	-1.10369859100706	3.74575135805499e-07	5.0962465774186e-06	2.41941407980018	2.41508109347462	3.06449971589352	2.56353206106854	1.40836492243261	0.974007814255811	3.43215019447084	3.46665675826966	1.98036438934791	2.41730544055644
ALDOA	9080.72239474145	-0.475547166185101	0.000299044258486966	0.0018884805699935	70.3013233901434	69.7435112515878	67.1213828358429	60.9020661892248	49.8028125544021	44.4569333759804	68.9610381005329	62.1229216483537	46.2697563597815	48.9571622992378
ALKBH8	614.939179606725	-0.704853406208024	0.00055685539355635	0.00319584207787274	3.1603803129121	3.22362459382741	3.98635183176479	4.63690808278427	2.17608010220558	2.31344411129852	3.00842146593644	3.29941158742082	1.91758862626951	1.87327728786425
ALOX5AP	12.2061958303044	-2.63600863461932	0.00101791405741959	0.00538092642594535	0.224592121312062	0.315815328841086	0.309768973658713	0.301810146160355	0.0572761370445696	0.0339061143467489	0.42076445896611	0.367264284893103	0.0318176857045331	0.0597898244414464
ALOXE3	292.882599037574	-2.68860880674622	1.51641680004744e-18	9.61070057555246e-17	2.02837604350144	2.07568116208851	3.29707171091657	2.80760330233884	0.301857734414586	0.467509755577278	1.76583626795104	1.57892070633301	0.274927281369945	0.278465250679811
ALPK2	1801.86503500835	-1.18360510715151	0.00730375042333871	0.0279174222043216	9.14793706996944	9.5051761506404	3.61639084785054	3.79098349890789	2.49776264488793	3.13222826465987	5.83844972063079	6.82927744258048	3.79175283269296	3.73771036757108
ALPK3	63.1170402580965	-1.17055244936989	0.0116876719128662	0.0408176593523863	0.200853801812295	0.202067424379865	0.121384909961673	0.0860201767681547	0.0555255519271193	0.0769153541996186	0.0928333774239569	0.121601093193586	0.0814313583021577	0.0718733897670222
ALPL	63.4096511643881	-2.43307165270281	7.01837533801674e-05	0.000538254075962433	0.369826346513187	0.385214625075085	1.31249546940136	0.831977988387871	0.111779783398545	0.14888470494942	1.38747981938405	1.19228753854818	0.0853809199562673	0.0680665308342244
ALPP	13.6399702317173	-5.22679966754667	0.00332480637716011	0.0145035314580797	0.246013794949492	0.253125295120443	0.069692394293356	0.0129013424982717	0	0.00724684705829201	0.192266585609115	0.235489216668247	0.0408028887695292	0
AMD1	1778.14073400977	-0.875406989751002	5.88106236985526e-13	2.09330177564606e-11	12.3281241216475	12.9288536932384	11.4630562521133	13.2798549786967	6.87598600440529	6.43888169823681	10.568036641414	12.2670518970153	8.16992512657263	7.51355488682919
AMIGO2	7180.80381369712	-1.42973213188735	4.56352439865767e-10	1.07636862623761e-08	58.0020451107715	59.0055500022473	39.5508077120639	41.4779647047309	18.2081868924553	17.7757803276197	50.3874427480665	54.6946564773703	26.6270381699127	25.612118620473
AMOTL1	3176.17623933653	-0.619365245347493	0.0144978454325437	0.0484885229073629	6.5115399245471	6.76906938504608	10.3654600069147	10.9188431303059	5.45885269246281	5.50282031374895	8.03078703857001	8.79928018911528	8.14320966129202	7.76572306957064
AMPD2	3583.03156989321	-0.6785659083057	0.000620044530791866	0.0035161134818223	15.4660055458215	16.0009735749611	22.918489907784	19.7834273950346	11.874476249435	10.7336085979949	16.588557006116	14.6237325638129	9.61944918684912	10.6664863040459
AMPD3	14.603062048162	-2.34749021438197	0.013503042911357	0.0458047965065844	0.0567036567104804	0.0398675694541174	0.109766444661015	0.0982122961926654	0.0299926287522073	0	0.0423300157669533	0.0665715502745732	0.010710848430312	0.00447270289454185
AMTN	24.9589170622863	-1.49863702067761	0.0126193342236935	0.0434088343786129	0.956916481087302	0.847223279035666	0.535135058606817	0.381012808771025	0.168715990167735	0.299627590996618	1.09900088343105	1.39093133741821	0.903767762432439	1.03156267682774
AMZ2	1397.15649737717	-1.49179339640779	1.08913204830524e-41	4.17161251284564e-39	18.5112683017788	20.0542733814089	18.9173985420717	20.0941537008762	6.63728218405034	6.82882842383663	20.5763493180611	23.5840315781365	11.8266177068367	10.6996608557261
AMZ2P1	349.486634387387	-0.798171577016633	3.07822376715858e-05	0.000263790002692447	2.12349501683597	2.57087394815418	2.58068182388569	2.94545482996675	1.54977267966809	1.3198462320596	2.36087229290458	2.58511507553595	1.94294022946174	1.97811327948202
ANAPC1	2642.44856296563	-0.564739500798161	2.92765725293732e-05	0.00025248356896477	8.04703757820244	9.00186974107324	7.49695121187972	8.49986088789262	5.17158502141053	5.73883776398689	8.57493450412337	9.08103379476855	4.83689694186208	4.74418139042242
ANAPC13	613.331835943741	-2.01707218114471	1.18259441919231e-10	3.0462179929458e-09	6.61979790789095	7.22639737074386	11.656741545768	12.9951223708996	2.19828011324335	2.43122670082443	11.0939624647429	11.4629370336457	2.90668895870267	3.07799660823429
ANGPTL2	200.802504962052	-2.62077164568076	1.27893037202846e-09	2.80966012777674e-08	1.11293978647797	1.03162730510467	2.40560702491343	2.20514896404424	0.319038131783348	0.21699153806458	1.68170928390498	1.52676151166691	0.31109537324491	0.503102694091566
ANK1	134.028870752334	-1.36306874889192	9.32999150734311e-05	0.000687612495219795	0.464835029657696	0.505084193826564	0.307873529527932	0.282900265760372	0.169814499623935	0.127590889296434	0.512235537285428	0.516090136028123	0.298241522235304	0.349079979212065
ANK3	241.785026312834	-2.01978493360366	7.96622679653178e-15	3.42334024214862e-13	0.404496324232617	0.41931854927884	0.287350299225278	0.357996426338379	0.0754876778490071	0.101113611540632	0.385041753238817	0.403261292103251	0.139663035477367	0.153594425266446
ANKEF1	166.352589995737	-0.659968718361416	0.000545399333701191	0.00314340558079204	1.00453006579323	1.02904704691702	0.976679733233776	1.16299253924565	0.630592452214308	0.658757244574775	0.916160986327851	0.923959318700002	0.685151108153071	0.767978596620414
ANKRD13A	417.39819786274	-0.794868501696392	6.76137519658218e-08	1.08161174984033e-06	2.65945260588319	2.82879176087556	2.46369212134559	2.78058429054005	1.5511065772476	1.47098571057307	2.60744615092373	3.17658593944822	1.81465836188712	1.50259927272499
ANKRD13B	300.686580382666	-0.900613369848881	8.23905128038278e-06	8.21062468942671e-05	2.10125996259067	2.21210075117968	2.94302876312473	2.42808307627967	1.28379415903239	1.24853148448602	2.24162006014504	1.83747889148377	1.03791035576669	1.30025124042692
ANKRD27	1710.6504824086	-0.684272793634657	0.000289217026779779	0.00183761802914999	7.83058865362845	8.33718248311999	10.7271149932385	11.09957136788	5.91879140868762	5.61346827092419	8.13533779192456	8.26672957731885	6.24774877422305	5.89434844607684
ANKRD28	3986.74775233447	-0.429547312974426	0.000313206084915033	0.00196803780674678	13.0155136999376	13.8685250332467	14.082066663878	15.9259210746211	10.4114078021695	10.2075020409866	12.512597844579	14.2139167738867	10.3660732132336	10.2643262273629
ANKRD40	2605.95222083094	-0.4247675421732	0.000548987659063554	0.00316182511497049	14.9107094523455	15.7598496440012	13.4643582739485	14.806976620218	10.492061410416	10.9588562961894	14.3116504745864	15.2973703032421	11.8976698697384	10.0236275840802
ANKRD52	8577.45917531485	-1.11396548164516	1.20243747083762e-08	2.20914971831991e-07	21.3569762192968	22.4440588473197	31.2545638588227	29.3297154451046	11.6388471874475	11.8795179466551	24.6127697618516	24.2294459087973	13.8087138607661	13.5912254345687
ANKS1A	976.480801422888	-0.543362880138897	0.000426652272396983	0.00256209488321828	3.37396528959726	3.94707002468291	3.98397982066564	3.51855220152084	2.26777789658754	2.69511166353291	3.86171940613503	3.85849246465277	2.58637054533046	2.73794278732575
ANO3	140.658770498447	-0.571047143427908	0.0112343553916836	0.0395164918438956	0.522696700265031	0.544445833345728	0.440066493516007	0.606523213366621	0.364869548170469	0.330671405275887	0.774682528819616	0.8822222991904	0.429410420084682	0.408369015008079
ANO8	288.975625945834	-0.953078280034379	1.36694383994269e-05	0.0001284253068455	1.61009750985774	1.67239695527766	2.20420996442528	1.67554787429414	1.01028741731394	0.798573921476054	1.6331844856023	1.36965436911881	1.3722526442945	1.57889105278781
ANTXR1	3048.90854055294	-0.427822827001653	6.80640722574447e-05	0.000523220283204153	9.84576955511107	10.4135537932734	9.67114496930198	10.4717061831198	7.00889555159139	7.65638904276288	10.7149937505884	11.9554343010842	10.534678055414	9.82876555264176
ANXA11	2287.86573149539	-0.352077760405987	0.000165099351116156	0.00113318483339133	14.3244780707045	14.4922380663392	15.2168263402951	14.6126758958479	11.3250184999534	11.1181970271391	13.541937945473	14.0045344475035	12.5768411474657	11.5849031840266
ANXA2	33926.5149938853	-1.02627729296608	1.2931767264946e-25	1.57134349959367e-23	455.591997144836	479.125034504923	493.495140149196	518.881347400957	226.826251799848	239.876028771758	437.84486321955	506.789399278935	283.974249667294	250.651790731639
ANXA2P1	36.0764951349441	-1.32745268706612	0.00345171196306322	0.0149681794430743	0.730070721967961	0.48530445636321	0.940463314235234	0.742052943128438	0.361085599635658	0.208410256092638	0.699743600463064	0.454163234483195	0.225661546042947	0.263852836577046
ANXA2P2	279.055938340863	-1.07506541534307	9.29676602604772e-11	2.43501027297997e-09	5.71552659865715	5.49196227143546	5.87976110547699	5.19355360291588	2.53574429628108	2.62966505162572	4.82466980706047	5.50508244302187	3.11546148497745	2.9561732282996
ANXA6	3835.41760048194	-1.42016048473411	2.53509166267745e-06	2.85952496829155e-05	23.876161301057	23.9170547710864	43.9503998710127	42.9934608786207	12.0105822272776	12.5035191466535	26.0929858437414	29.5727333092496	15.3072179122996	14.845343151765
AOX1	4621.36358452631	-0.806587118592204	1.87624158926816e-08	3.32905343014256e-07	20.9168201608536	22.4202954993858	24.7224903566664	26.3561690661955	12.2635334580901	14.0713467535451	23.1705017055286	26.8164378263984	11.2427756962151	11.8371247200993
AP1G1	3296.53987301825	-0.374187927580255	0.0148745063372305	0.0493733849200574	11.6443004294926	12.5668663329397	9.86902922964821	10.8586424957635	8.09410176161095	8.85047123943813	10.3461164991559	11.7570446197784	7.50282680550651	7.2998358233673
AP1M2	762.891213706925	-0.790770123503334	0.0107665000098902	0.0381983866198846	14.133756678087	13.1688206680709	8.02533901231797	8.14810095506167	5.38206615028938	6.92354363958727	11.8613908096707	13.1201994162099	8.47496745662662	7.3325623626796
AP1S1	1614.86787515751	-0.684682832472443	0.00926028630301388	0.0339486026576782	23.984667966737	23.2317237899514	38.5855514285212	37.4433067143536	20.2275587145785	17.1479454404947	26.9224147281735	26.1691867123108	20.8429146531553	18.9491179147927
AP2B1	12531.5572739536	-1.07769676850526	1.46777602194148e-24	1.61629660816168e-22	52.7385939054818	56.5429246236628	57.3239654775971	61.1096679005744	25.4039164007977	27.2613572629748	52.561959557694	57.1646744235556	26.9074212201553	24.4501960717928
AP2M1	8391.25547872163	-0.341963773974385	4.48106302606045e-05	0.000364169047307007	93.4170169152066	96.1908447798101	98.7909368995345	98.2690840263911	73.3543872469965	75.6288079974657	95.5073037048243	104.262467861931	75.9237879693549	70.0543872052328
AP3B1	2121.61852649709	-0.498438629924808	2.15024252492117e-05	0.000191726331207419	12.4203422953366	12.7537055957343	11.5110715943679	13.4235075281387	8.47353931636978	8.84824812629014	12.0280204615038	13.6949451797008	10.8530998193809	10.1269107438735
APBA2	305.147990850639	-1.27781862418536	2.8483109701031e-08	4.90561006669076e-07	0.974875769771872	0.940302389585848	1.3627352782416	1.2271041543049	0.499729967344074	0.408243033828745	1.17982783307902	0.981025035629335	0.446947114317524	0.462540040597449
APBB1	931.478770288193	-1.04146051564839	1.08139851148623e-09	2.40266839519243e-08	7.28658889708966	6.96020826705426	6.93431806616631	5.61804229481568	3.2655529130435	3.10213753869101	5.98761981130014	5.71522229588586	3.27424751867086	3.44386743215278
APC	2901.70274770849	-0.563190437034185	1.98820714483825e-05	0.00017899959982067	5.89359081890776	6.5619813935245	5.76714753177542	6.81093686740314	3.91504389320015	4.35560254480305	7.08247082341016	8.01005299505417	5.18616078691403	4.97148623158949
APC2	23.6295658857184	-2.45494437610791	5.10625173041854e-05	0.000408755335021555	0.080784354540505	0.0469204012223882	0.0897494685410764	0.0585275610990699	0.0119431080758223	0.0127260659699649	0.0816861557037465	0.0406469607455406	0.0099518423910839	0.0324148688644232
APCDD1L	25.9189910503246	-2.11851453009736	0.000555561540296893	0.00318945545079536	0.296816845490304	0.183392383974792	0.141032159259085	0.135372966668292	0.0305838774161635	0.0543147896321533	0.334690682764372	0.343945012592974	0.0866478095813408	0.102163574894903
APEX1	2539.52058637064	-0.423524230460704	0.00470645726169794	0.0193836069410603	40.4407725006295	41.7904972508594	35.3981941177053	36.4664586934285	25.9330956882181	30.209081588921	30.0188352488844	34.4811664969912	28.7776932996145	25.5717960671301
APH1A	2243.84812542062	-0.464006555798308	6.33670354547544e-05	0.000491401319400228	22.633838452361	21.5831240992547	25.2195430498565	24.6962212272961	16.5426762277212	16.7796362266495	21.2889630678099	23.8453736361004	17.6185169084819	17.2240077664993
APIP	249.915681898762	-1.06271547051759	9.78645923146169e-07	1.22375887295333e-05	4.5928605152613	4.37754792879228	5.25342032234625	6.24323948392477	2.56329775418728	2.22553680857047	5.98827824097665	6.79928951985099	3.22761394374724	2.33884184045815
APLP1	236.426873972685	-1.38253391133284	2.13651192269906e-05	0.000190791705859274	1.87240451376402	1.83203475878486	3.29933647263493	3.28345091718343	0.968326598064475	0.954421912831708	4.18719043988487	3.74693737203318	2.3318780319758	2.27435334586572
APOBEC3B	623.701077846679	-1.59572657436819	0.000406281450635131	0.00245819810396304	16.1810737856218	16.0382030293453	6.20629802915497	6.39246841108364	3.75212075923095	3.52773499204601	9.99204743392055	11.8274382514664	5.46486336522072	4.24593278640752
APOL1	50.3927514096308	-2.36565674148238	0.000283918626837042	0.00180801413333875	0.688346189868816	0.738254501115349	0.203261881654673	0.307291318644615	0.0634735550144881	0.119769798551425	0.651201177917851	0.769001196607752	0.0859473152784427	0.0993888442940274
APOL3	21.6581981675145	-2.0377616561234	0.0101661282620329	0.0364577679317643	0.213106362973433	0.25073957326109	0.0909248563556987	0.0514306872634808	0.0354919219549175	0.0367681576656011	0.0899076920168855	0.105037020319607	0.0640778227594342	0.00617492697736333
APPL1	1016.37652442421	-1.40905601469643	3.74982462170519e-08	6.28024334694143e-07	5.3363328922886	5.57201036401771	3.34501526853472	3.98162786303776	1.64046669742065	1.71958831408083	5.26039372251303	5.57425414785615	2.11377592207723	2.10925214001769
APPL2	639.496303266176	-0.567393858920505	9.28507904061753e-06	9.15978766050617e-05	4.11777173583673	4.37614301264256	4.37008671880611	4.51825798377584	2.69485591191458	3.02742679980437	3.83736274412423	4.59185415633528	3.30594059395079	3.27487590193036
AQP1	739.724216450298	-1.41490201742417	2.41716251279587e-06	2.74761202019036e-05	8.20996345309283	8.91224572028984	5.1941664934353	5.28121148173973	2.86236544864237	2.20919162678294	7.56286597416519	7.78155867236683	4.9435882948373	5.0813143524105
AQP11	71.4473379818786	-0.816013243523868	0.00417084006836249	0.0175551913914187	0.712086376268678	0.815025044530089	0.952092626154691	0.872347672808123	0.405428856739081	0.520009240933418	0.821621840209301	1.20818389479912	0.450442666174719	0.705369967864718
AQP7P1	74.8424321721438	-1.65769574504237	0.00117238792508977	0.00606112172891921	0.420448104460965	0.35473360934096	1.08737010300027	0.777445852915896	0.190620267417724	0.216657938215704	0.376643961045894	0.304632131809011	0.0762423789523718	0.111432188529237
AR	337.824032880535	-1.60950341073717	1.32991676198383e-19	9.60319812680046e-18	0.907963073933198	0.927496266140545	0.842514685546154	0.786897970578172	0.266228166068334	0.288051806465852	1.16632541931154	1.32253356356402	0.702804472156921	0.646904789944529
AREL1	2122.94334363891	-0.757491147629123	4.57679898886559e-12	1.44773108410813e-10	9.3931426879737	9.46546971353921	9.98964892105579	10.1192313697704	5.31249758173234	5.93914319201078	10.3723548636746	11.2216270115088	6.12620466985252	5.68510273772262
ARFGEF3	1354.8394606028	-0.904758205055706	9.88721739306824e-08	1.53212738125303e-06	2.50598597125193	2.60582926698693	2.09810915196819	2.08107444956263	1.17307932879887	1.25287671955521	1.86222137778568	2.12761223626408	1.3969999398352	1.42185307543727
ARHGAP10	777.644722743438	-0.445911633839599	0.000544088768437568	0.00313893255111379	5.97344490191244	6.05368690914586	6.1588350141366	5.91379007105862	3.99883396591275	4.63579573216692	5.25784654763302	5.98764290488479	4.58165303753545	4.55532203014292
ARHGAP19	422.073078882044	-0.679448136888772	4.41067785840684e-06	4.69273751130858e-05	1.86759043733899	1.99101276607879	1.77476660096195	1.84933963683648	1.07618756690692	1.20322533544793	1.99662688800593	2.16949655775094	1.46312755799075	1.38721704087417
ARHGAP24	20.8101799227155	-2.75137690001654	2.14715760428658e-05	0.000191548201670507	0.102045271077499	0.0826173448063248	0.111339795434733	0.139623184702457	0.01682351987201	0.0149386869801808	0.0862996877587577	0.130695022724652	0.0350463667343947	0.0439046412492841
ARHGAP35	3735.3176664448	-1.0528723313273	1.13729360807345e-22	1.04910869532179e-20	10.3395795553828	10.4524551574456	11.4337461263593	11.6395554939045	5.00869765487413	5.31234575429083	8.96243381335674	9.32092369096692	6.43998478697101	6.09139108123021
ARHGDIB	138.215330424178	-1.97585864920323	0.0100684779541629	0.0361738403495915	0.490651365939769	0.613280531541558	3.57757487604715	3.4774312763002	0.44489721129421	0.559658263567514	0.385061080852848	0.420598673321083	0.216253230820565	0.245111869482178
ARHGEF12	3406.72375687667	-0.696212533996528	0.001201234352064	0.00619934037756755	9.34930253949169	10.1026753875861	6.83851229699467	7.28007811599101	4.87744426255413	5.25906771400262	8.69480181735503	9.88978735636861	6.29189813891872	6.20274187493528
ARHGEF18	1389.39981911548	-0.838829101999446	0.0139726749690809	0.047098634069301	4.09875365877719	4.06563192062686	8.48168892092349	7.35482460076015	3.69315413953426	2.84335890154935	5.48156304034181	4.57339903805397	2.96049053670318	3.45032872189415
ARHGEF19	272.509909684687	-1.39928714718433	3.98997760160027e-14	1.59409105130601e-12	2.15567430415281	1.98832028063206	2.33643073926897	2.39776914382948	0.907172179569532	0.741093684576875	2.39363554679004	2.20148865083967	0.864772508350832	1.19698954129708
ARHGEF25	445.190995270011	-0.693328402753101	0.000170095357749418	0.00116159306518876	3.52788213977987	3.31004427417179	4.51924896522388	3.59098752315437	2.27160348007044	2.24366173161133	3.59649842170566	3.45879373009672	2.16033013681237	2.02763138510866
ARHGEF40	2965.84993458904	-0.843030235886147	0.000990199638980072	0.00524859429578516	15.0539107979446	14.8270943546758	10.5448120852476	9.61929701264367	7.66501771852819	6.00044748434244	17.207379095297	14.4684568667652	11.001768913372	12.1247636800616
ARHGEF6	132.611391696339	-1.12049028938919	2.71616799296515e-07	3.82849310944424e-06	0.665282957174611	0.622154767493892	0.585158553215715	0.65619102701875	0.259160685310966	0.308134098950119	0.474017132246054	0.614231091854038	0.34039736037703	0.256778521393458
ARHGEF9	483.380417596676	-0.86767546187615	2.27306578111232e-09	4.80782064794933e-08	2.03130269310109	2.00239850007356	2.10565528927689	2.10656796512411	1.00096273062955	1.20315781325588	1.46880788764202	1.88154973171738	1.74951886188074	1.69901162478351
ARID1B	3097.22196440633	-0.401289490491197	0.00159034204438602	0.00785540691898998	7.84439774094248	8.08371571765654	7.14964424431236	7.07897921155944	5.47429446791896	5.68528986749556	7.24597881353828	7.99438972174312	6.74382748171734	6.12160208140432
ARID5A	781.730519669472	-1.59890691558011	2.76897592903355e-25	3.25243912624281e-23	7.77997291643874	7.16604614718253	8.55215786813757	7.27086621507138	2.32763349706335	2.63123698211619	7.96331186829969	6.49455034107406	3.37810724738316	3.98987121066046
ARL14	236.824912801777	-2.37203670141652	2.01360719111689e-17	1.12627762223138e-15	6.44983061116579	6.16964738150877	4.24400708925683	4.80611568542078	0.941261568926027	1.10326494741634	4.1202293989999	4.63807150991824	1.39609977297491	1.41490205665783
ARL15	381.889967402182	-1.89373015256519	9.42077203838797e-19	6.14757713127251e-17	4.39579677098385	5.0922204634008	3.51478984931724	4.51756128269226	1.15089861859737	1.15186680899223	5.18108626457104	5.87397847077158	2.45441576329779	2.15846236693685
ARL2	189.794320003565	-0.672725887143044	0.00825816976988219	0.030865654046575	4.20207848401273	3.73459682868075	6.08491406044096	5.08457705419129	3.04323311827626	2.81213160622832	4.53143483306676	3.80755625970809	2.78323582349092	3.87413658370596
ARL4C	4714.31745837758	-0.778696793989087	0.0122946266138693	0.0425577654832541	21.2786763577384	20.4640541980737	38.4031541974908	37.9955885126061	18.6519247879279	14.8883159091116	27.458499188534	27.0723388106638	19.2526730962311	19.1109912312592
ARL6IP5	866.66729474378	-1.10556544794702	5.84906638657399e-09	1.14251331114243e-07	11.1334974187658	12.3101008479631	8.66950132377794	10.6361838327428	5.04763901357226	4.66424172147347	10.2090881407785	11.9877324801159	7.33922467880573	7.12467311205224
ARMCX1	631.092867660302	-1.15684064225106	2.38132870699273e-05	0.000210203559561648	6.31843024830453	5.7116601402747	8.99864078265516	10.341702235181	3.64897058742924	3.20987420067464	5.66705928276259	6.29941227088727	3.95938505229921	3.99897592790977
ARMCX2	2115.14831930643	-0.332526069834212	0.000497420970279693	0.00291843492352911	16.9859875942989	16.8500093149579	16.5274121138708	17.1256991768832	12.8331550447233	13.3452784773877	13.1790667119813	15.9441166232591	12.3493488291053	12.8734107884551
ARMCX3	1161.23732504234	-0.780509284023282	1.31356578845924e-12	4.45071454362756e-11	8.41701916112009	8.05932920161961	8.44358655609169	8.68368326737564	4.98233517664085	4.57947820597597	7.18982342263193	7.88507328763557	5.77846821026757	5.5954532961162
ARMT1	419.762680499732	-1.13912915447233	0.00739830666516	0.0282022425645725	5.79394609537326	6.05749997930572	2.37044636291883	2.71681307712499	1.92820126362491	1.84451606687337	5.92510514706354	6.40940699913183	2.84085606399944	3.01437493694422
ARNTL	389.856798734991	-0.500472716149836	0.00111123721378443	0.0057942848386114	2.93657082932148	3.33093239382991	3.35402523732021	3.15696513672904	2.05102185268391	2.35212056597575	2.7702976949383	3.02881772147551	2.65007542868869	2.29706226207406
ARNTL2	2417.67904198764	-1.53681689023015	1.59235093600674e-16	8.15570672718106e-15	9.68702491938356	10.2743128839802	7.45446476671282	8.40847770316257	2.8631143680353	3.17286804451552	8.61920428659227	9.57702383215079	3.41713139465	3.55320013914856
ARPC1A	2233.9801686279	-2.2600992527561	3.09843916004184e-89	1.36478498901943e-85	39.4146419927517	38.2647266681675	43.1893004822352	42.1461811385807	8.44944797056583	8.17270279540335	26.143500791414	27.8189818438822	8.70026599395516	8.2217519633297
ARRB1	596.982110968509	-1.00628969494749	1.42998963076355e-08	2.59474637532677e-07	1.78696592932402	1.88625344553933	2.10854792926482	2.45612952500133	1.02828509265561	0.973189322981001	1.49921136201313	1.64798702520627	1.02874504809505	0.841233238507455
ARRB2	477.860721771077	-0.654916725685474	3.28816538853717e-05	0.000278907828825299	6.23284727774549	5.17449769964749	5.99184575896783	5.78260787940866	3.37660505697813	3.81699128743537	4.07659679137263	5.03190435993331	3.63177277715841	3.27480924850154
ARSB	459.357629401999	-1.28817462420654	5.91061443355044e-07	7.75421561464819e-06	2.1756520960996	2.22600032104962	1.44176532048796	1.53250677540453	0.729803309542142	0.747985739078025	2.3978285871713	2.5627782517266	1.04681996498098	1.02335683343176
ARSI	159.551445306844	-2.93156463003444	6.40980520523465e-20	4.72528694188407e-18	1.25249556310628	1.36633163791105	1.91791097709498	1.57594532368892	0.244455178480499	0.149233905930713	1.67197714742025	1.66168797796261	0.286449391621624	0.414673388585709
ARVCF	2489.20760806507	-1.05379276998175	0.000303994641798457	0.00191836733303976	13.7368604674531	12.2668452453799	22.3575445692704	16.0736710584249	9.23977431811001	5.91071950745431	17.2258404161896	10.8587886230864	9.2460886001321	14.7125040252176
ASAP2	836.908469050872	-1.19053110502248	3.78232810897209e-05	0.00031508670899281	4.65865619134905	4.84957721703653	2.90827446329867	3.09079563184368	1.43776428673538	1.88678007481248	5.37616545508826	5.88986241900223	1.54085087706088	1.62925615713103
ASAP3	532.09054144863	-1.36460046382221	5.60094321167271e-18	3.39116901877874e-16	3.04845128533066	3.48969472978515	3.67035867379414	3.69728332592178	1.23220026042336	1.40009713505542	2.5651647627123	2.48870951612756	2.02431595754082	2.15802097562504
ASB13	118.751171282084	-0.538117381638889	0.0128261320936395	0.0439827990186521	1.02848074783528	0.883802112161452	1.05445237865795	1.10566986237592	0.682159880066674	0.690076365711075	0.820271611416519	0.830529988985471	0.669157204159973	0.540833882055818
ASB9	24.3175227376397	-2.0004894007608	0.000171035614295987	0.00116603598925532	0.268531092567295	0.280155665556612	0.422563476419511	0.391121311860868	0.082472442229709	0.0836943930425094	0.393959953872629	0.418412775792098	0.157078564994197	0.122988462974793
ASF1B	472.442863200604	-0.421815969652031	0.0141206999394757	0.0474657062138883	6.98249898819195	6.95122127605163	5.56216569047866	6.21116911712502	4.80455575928846	4.57722749887249	9.30377366408101	11.2652684675839	7.33001542764513	6.82856672019592
ASIC1	410.274391595763	-0.898184329389663	0.00218770021020351	0.0102471091290088	2.55209158542235	2.87941425239824	1.80562015884748	1.58224096578175	1.15705214347778	1.15925835422241	2.28386894596521	2.45076492864649	1.41207775967215	1.42160743896463
ASNA1	891.905898919753	-0.588183277569878	3.24212977647582e-06	3.56351119973346e-05	15.0050697030702	16.8263595152233	17.5067983963484	16.6271206092451	11.053190191252	10.3719423076465	15.8462991408771	16.1782691005115	12.3624058292179	12.5784625336215
ASPH	5063.66545087797	-1.60452277278526	3.51167427335393e-41	1.31642955366432e-38	10.6994590976219	11.6058294905499	11.6631452601513	12.8498936641387	3.59683478415433	3.9167296213493	13.8356323162558	14.649132694279	4.10868044906177	4.11648610123622
ASXL1	4977.12660547223	-0.743310957250708	1.25800614040772e-08	2.30403432306067e-07	17.6277213841323	17.744993416277	15.5717344328621	15.827533782116	9.39506068561517	10.099706751687	15.840655835632	16.513956290082	10.824569511141	10.4141661216227
ATF5	181.261730106728	-0.574737607294257	0.00515487347820984	0.0209089082550309	1.57458138045443	1.55952010742523	2.00376874302155	1.61179830936213	1.07081154830509	1.14101105998679	1.66292113960532	1.35028101435057	1.13280247375855	1.24416716093209
ATG2A	1484.87218179567	-1.06828501083598	0.00355100261242363	0.0153383464153695	4.1427563864371	3.93344448874332	9.16206200716273	7.19625163421777	3.29480836049786	2.38175423508251	4.88927495382919	3.23715125159252	2.74546736949314	3.68167594626656
ATG5	706.219920565922	-0.989816451662828	4.53172055721965e-07	6.0996474024181e-06	4.32058598532449	5.30224619367451	5.29805717100715	6.57035545715042	2.74237830081691	2.53633473169342	5.5756107295025	6.45588234681421	3.86990547455664	3.71040006299234
ATG9B	38.8158155991755	-3.69976002974574	7.5882325611722e-07	9.78032695649547e-06	0.325873574132917	0.337646511616949	0.119524400680524	0.143820055217648	0.0139966700108915	0.0207142414952718	0.109914186231418	0.103556558180217	0.00388767181496604	0.0146109442063954
ATL1	216.417105194226	-0.784764745925534	4.00273894882194e-05	0.000330015243515647	2.07403851024852	1.87303218633937	1.69544404049589	1.75891163822521	1.05061618832237	1.05044173089612	2.10607464872683	2.54616522314154	1.24079204231598	1.27807294461666
ATL2	1462.21944041718	-0.480472378833521	0.000248515589104179	0.0016181064909189	5.08698396681614	5.61209198527074	4.77418732118448	5.26622315317996	3.81136116469253	3.4516555628416	4.87407491633454	5.47422862641808	3.97588458148026	3.71489599891178
ATL3	3764.65769823606	-0.983432833376705	1.26051832372582e-10	3.22337769894415e-09	11.7555541409464	11.5615479038381	13.3694983349813	15.2307914961891	6.56754155792669	6.24501633694532	12.0158406551035	13.4605640432929	7.48973137891691	6.7376857215921
ATOX1	1040.21356546832	-1.02598655980838	1.44627807210292e-12	4.87227023946107e-11	51.4759171295555	51.5197974138957	58.0519259353504	60.2382809001586	24.3460673325714	28.66314740129	55.9957056801369	55.8360725846527	26.732386673372	24.2758099059705
ATP1A2	77.6826540061153	-2.83369927373238	0.00300188934840283	0.013295698448846	0.813436486651473	0.712024091560928	0.0758864223733042	0.105359781644764	0.0266595910011374	0.0907456111479325	0.513256438480268	0.427364524293788	0.162907483706186	0.111318419704067
ATP1B1	849.659049333974	-0.568082839786409	0.000254012249557661	0.00164477832596708	8.46782482384384	8.31796566387984	10.1363374277668	10.5058740014119	6.11683109028256	6.20466480675347	17.924038347619	18.9261173890009	10.2031363633012	9.45711959506114
ATP23	145.122127346705	-0.764548257750888	0.00138424816028225	0.00697627812815017	1.30000684018944	1.28700168446746	0.981789895343567	1.17195702438886	0.761184502776752	0.605498006695866	0.976162916800337	1.2202109661589	0.87212505420339	0.720097852903358
ATP2B4	2054.18935276695	-3.30847510352873	3.10829326189738e-43	1.27360509259e-40	5.67586086847215	5.6515055731521	8.34956058400988	8.77032539863085	0.682283789450577	0.716874846998331	4.05715314175811	4.67390993263322	1.31825808361259	1.32797758053132
ATP5B	5390.38349609263	-2.24833866570777	6.16675381122555e-47	3.10434386857094e-44	92.8783778833693	93.1713053870396	77.2500145030751	78.926710306118	16.800482238653	18.4112224599308	79.1853094479525	84.586978324758	26.5297002833185	25.4346280845107
ATP5C1	2026.9301305584	-1.43010572527149	2.65324311816615e-20	1.99775600422946e-18	48.3245544554552	52.1890220249977	40.5632093439426	47.6834279214405	16.5507836283512	17.6725495486335	38.566897924612	47.4966778206087	24.3416154918076	21.5100525405217
ATP5O	2577.02911155771	-0.657946619546093	1.03919744338275e-06	1.29122847355152e-05	81.0840950874011	85.7158459044092	71.7760239487464	75.5422183391029	47.6815550305485	49.6053604306632	61.3609735598785	75.1854274693885	53.9447938820826	47.0106767286325
ATP5SL	793.302060598288	-0.61403247106691	0.00383032497446037	0.0163695209993004	8.28837452105414	7.9912197755737	11.6983144271352	10.0289335694074	6.71873338831632	5.40635404434282	9.81425575578357	9.56359966522201	6.94613316630081	7.91978145364171
ATP6V0A1	22.4520240327806	-1.4962125171782	0.00913767228247968	0.0335619445372127	0.188509488988795	0.174709783724123	0.114450621947798	0.115146264606961	0.0291359024459679	0.0724406047927416	0.172707685093864	0.202632551025727	0.0825455220332696	0.0912437839949975
ATP6V0D2	19.0490146996579	-4.11038237576709	0.0003643469902173	0.00223439945027449	0.157960756207613	0.0528857420395805	0.410617589111449	0.396237244632044	0.0102307586563437	0.0181690992491017	0.124398862304545	0.128679583103572	0	0.0213595153419513
ATP6V0E1	1226.16172468732	-0.931410334782659	0.000871609340091805	0.0047295611219826	24.9618418843469	28.4215892593664	44.6039225109484	45.0224087875399	17.4291761245452	19.0892961464457	32.6956916263231	35.2076916963392	21.4641314124361	20.9777321680671
ATP6V1B1-AS1	81.2677945584866	-0.861391519335524	0.0129835117983409	0.0443756536129908	2.05841415209406	2.92104087917768	1.97405183369708	1.78656260248312	0.898984566253926	1.43687934792552	2.08860616338781	2.52748575461596	1.17715325554112	1.0993136153482
ATP6V1E2	194.359893182662	-1.10474279583594	7.82386482333442e-06	7.82786339138723e-05	2.8460451953506	3.63964263914634	2.90216914320302	3.45715839641696	1.1582427713266	1.74570669812315	2.95334901138245	2.90909963709506	1.21911132655458	1.14543925139867
ATP6V1F	317.627441870856	-0.843673496138709	0.000789752852284471	0.00434154617922	8.29162773448601	8.19230568059392	12.8491364072092	10.0868127795698	4.7781524853134	5.92941993548562	8.16453181805088	8.19022523287411	6.45447263187368	5.85530459432084
ATP8A1	460.037070514697	-1.82955378079552	1.34129014031796e-33	3.2822487475364e-31	1.45103485353505	1.65275868493391	1.5388969567999	1.61737242555173	0.444710548594674	0.415534835799553	1.1353707600257	1.15481700410456	0.886447894340751	0.846532745717961
ATP8A2	465.4045868303	-1.2931598541107	5.56855493631991e-08	9.08447865027968e-07	1.01060088600595	1.10069063859001	1.51098455204553	1.54670700599525	0.477340498965892	0.550354039097714	1.03699376287961	1.20372917884128	0.60808444478814	0.683517700290211
ATP8B1	611.658253033821	-1.77191515774681	2.66154084596502e-31	5.39007909943192e-29	2.8460753870713	3.17464078452752	2.65009495821196	2.9596251104487	0.828918877930868	0.833948804368925	3.14660721110891	3.64649940195992	1.61279980131482	1.70075770400888
ATP8B2	3762.52540003052	-0.786183587183553	5.52685734721066e-09	1.08923601342846e-07	13.836218020907	14.0074470191421	16.4679080846041	15.6378404629735	7.91688340726161	9.04870435259107	12.7579885092413	13.3656428194125	9.52993448290201	9.12369512064768
ATP8B3	474.454175588105	-1.62832385397022	1.30435560596896e-15	5.96920556404341e-14	2.16789049061566	2.07257334276615	2.66214990144292	2.54962205169303	0.63215126969072	0.857370593227032	2.89231519998545	2.67489980023964	1.29523548600605	1.28363058806791
ATP9A	1920.34157201395	-0.939653820060496	5.62794378118328e-14	2.22329016772799e-12	6.56993465734297	6.6139372490838	6.32414863318374	6.35897980675815	3.03165754510684	3.55355829488499	5.02367309276732	5.2933374464618	3.90724686992731	4.12109457742633
ATPIF1	442.028155130522	-1.31617244507632	0.00134312921944156	0.00680408099981047	8.77921851866462	8.2561099505281	3.66785097532136	3.94250282355755	2.40579611478809	2.44943054110682	5.37003231669654	6.48615877527895	2.50847328360959	2.27470516502687
ATRX	3674.64188777919	-1.22427633446837	3.99534371729771e-05	0.000329714102834044	10.6151679609908	11.3185103554164	5.92564303176199	6.96736254215184	3.71915432127761	3.58264031490343	9.57131166299465	10.9171612584246	7.34159068021722	7.14889842964285
ATXN1	825.715287385198	-1.01816230136011	2.01045211726069e-13	7.55269847633607e-12	1.91913450313755	1.99156884722764	2.16673037923006	1.98568715662497	0.893642724904993	1.04858388417414	2.0010061684923	1.95147997938452	1.13786517704069	1.21367272441785
ATXN7L2	448.559205623603	-0.808873264600122	0.000369869957064778	0.00226590360692779	4.19106624362769	3.67282819590246	5.76314847121774	5.36650622819007	2.69749285227398	2.59413090223478	3.17939755995455	2.90706416295771	2.92630541382057	2.99651941302261
B3GALNT1	339.59432349805	-0.756888693655303	0.000860004027319213	0.00467667944353371	2.08087746289113	1.96219030269897	2.25765649733281	3.03186155066222	1.42511292922944	1.27136288414993	1.70044805737358	1.97575351623086	1.69247192497266	1.77962718322833
B3GLCT	425.217584166966	-1.14561821488833	8.53785833819967e-09	1.61751103291118e-07	2.75889004467185	2.96910824155087	2.15755113725614	2.76579305078542	1.26040129727084	1.09363918314258	2.51490252797173	2.65706513257578	1.60175954452277	1.58006165532776
B4GALNT1	689.622638836704	-0.736460575333731	0.000436350636110194	0.00261320933297944	4.90908361760843	5.16596429196521	3.88830240628062	3.69771851277839	2.50463835760673	2.67881885644503	4.82261895479713	4.71823188178516	2.59188736484918	3.08400699297795
B4GALT6	245.705438684308	-0.978181116940973	1.49768879084742e-07	2.24576840901623e-06	1.00321262853256	0.965428167431705	1.0449046389019	1.1993997334007	0.567531975463207	0.478929493652866	1.46825350429169	1.78084159391227	0.657375359028252	0.722691968292914
B4GALT7	324.469009236537	-0.658659274739615	0.00286285359336121	0.0127670472258229	3.69546373319854	4.12233181841353	5.62300593607226	5.0603442919625	2.83605871403472	2.87986009435603	4.31056104079891	3.76032431376676	2.78436991344881	3.16571021825469
B4GAT1	115.105895101093	-2.3209650919558	2.76474632158545e-18	1.70919527859699e-16	1.5157255723331	1.59852903764854	1.82049327667111	1.61096633088201	0.327977364461336	0.312034530582399	1.59340970276138	1.61195037862224	0.575869369526731	0.415736653684646
BABAM1	992.228664191269	-0.422231462408638	0.00941595084142384	0.0343827791006628	14.590054436136	13.638378509553	18.1070424241445	16.1584276549623	10.8771131284641	11.8862659670384	12.8420234071632	14.155158381032	9.85934074683492	10.0027551419798
BACE1	336.47040162825	-1.36217486671924	2.91421744067367e-11	8.22846107167137e-10	1.38292505428749	1.27837664619862	1.77132713080504	1.62997532756901	0.616241760195477	0.536471327496318	2.24363525315696	2.18730143810154	0.943087832008034	0.916578670811675
BAD	275.725206928491	-0.972030977721838	0.00402539716601222	0.0170489116990311	4.93737979924847	4.66949992949473	8.35667607043357	5.29228036522851	3.70438719681776	2.09323164265693	6.87985926130664	4.42623629424022	3.36737173706309	4.07375168219103
BAG2	949.36646567988	-0.924984825906754	0.000293004171932365	0.00185766121096666	13.7003793446206	14.745070645322	9.50520708799796	9.34898110402716	6.30986527304844	5.8862303334864	13.3080866236216	15.6052213719902	8.30027594837481	7.63524605070732
BAG3	1389.35417622553	-0.665953067414062	0.00162760624528435	0.00801251590826068	11.2069304792017	10.8799702317395	16.4500392032849	14.7858776042444	8.22072719794882	8.17132076486217	10.393194458104	10.7538923914413	7.71520048437265	7.56670600327094
BAIAP2	1597.52800937627	-1.23657056966281	1.06991329166497e-09	2.38121204610972e-08	7.83412358626095	7.55055473697626	10.6974053852822	8.78605266719518	4.07003270752896	3.15679287606968	11.183132561808	8.47333932483262	4.58793225029302	5.61318641795192
BAIAP2L1	779.442859984764	-0.375017368534973	0.00478227555170736	0.0196361950467331	4.39117375061227	5.12968641329636	5.13973052422086	5.19594538413532	3.81211448364125	3.66075170265825	6.25600014241428	6.72118274465082	3.19854438021851	3.29664040194591
BAIAP2L2	20.7032191914386	-1.74920868215858	0.0023788657438847	0.0109749242056833	0.19946293291351	0.222046150493456	0.357159712237097	0.312714708550764	0.0565195757937866	0.100374744103429	0.231942983649995	0.217447851661651	0.10361143806348	0.141600143665523
BAIAP3	91.9127295637085	-1.75311704777848	0.00652862182121737	0.025504093271481	0.228101373207563	0.212188424065104	0.953762366264984	0.656437067898772	0.186147445394851	0.110194871626934	0.496937335158251	0.286042375734051	0.131247953531199	0.204281900174942
BAP1	1451.95759314014	-0.602078018808058	9.28071075243781e-05	0.000684457273952289	10.0189568302138	10.2885845941503	9.51641264417451	8.34226566792355	6.46627623381046	5.82908494336826	9.91281375963567	9.26297883635415	6.81299096653024	6.97574876893179
BAZ1A	1576.23197980906	-0.964457415139931	3.28691637264497e-08	5.57264621142693e-07	7.34296959458463	7.25867358510937	5.60318045893239	6.77590367122262	3.15983511372656	3.59674775984649	6.49034676757077	7.24018935610792	3.78493478823481	3.89173848972679
BAZ2A	5006.05601946479	-0.459027056865427	0.000931190234935281	0.00498985424249535	13.6145153058813	13.9146952107632	12.3200759943158	12.0994304175369	8.64994359792778	9.81951264652265	12.9354964828628	13.7219799532334	9.95955172117248	9.97654802820314
BBIP1	328.240114715806	-0.642600477821239	0.00314564409975468	0.0138557758483944	3.57989342146244	3.80093697726907	2.63449432432766	3.05392608057868	1.98114898419611	2.10927732075395	3.07858739341941	3.9160501822115	2.62819257526875	2.30474380177543
BBS7	975.543247733995	-0.736803667904848	4.99612482783943e-07	6.63851608911787e-06	5.58290670310214	6.32842991747521	5.06760383958308	5.70204087207533	3.32389750936916	3.32358311661202	5.41781085518113	6.29682157552908	4.21825828995946	4.12589816085665
BCAR1	959.195462303006	-0.810343397116498	0.00582001524669538	0.0231578248942019	3.9376774032477	3.48681032920454	6.29386041445241	4.2189890322262	3.03535908020878	1.96057452922869	5.14317602479327	3.03759566149568	2.26698060191747	3.62860216075744
BCAT1	6741.97589520717	-0.465171695021535	2.16167264860548e-05	0.000192648004025189	15.5661588626444	16.1064621087853	14.3908749710672	16.5901292384188	11.0482589960292	11.1199257795052	10.2646166700958	11.9789272286386	10.7945551019728	10.0729318977671
BCKDHA	372.070494266295	-0.844137516564687	3.4029544718247e-07	4.67680614969418e-06	5.50687474451602	4.57834313386168	5.53238968620043	5.61768378027899	3.02061130858687	2.76715176726173	5.2142863034882	5.00565199674896	4.04312390075782	4.38020568423065
BCKDK	485.187288914066	-0.820107546952918	1.43515986240516e-06	1.72601239697724e-05	5.0326559061116	5.10160488991268	6.47924321903037	5.43625164211842	3.13321014428563	2.966365186275	4.91983917918252	4.87862514556508	3.29308032998696	3.38468015624631
BCL6	499.844218653559	-0.870148191838913	9.87763824334068e-07	1.23340969673579e-05	2.8298960417586	2.83786887472768	3.38061411663318	3.75102557251824	1.68355820183334	1.73326350572563	2.95288865459981	2.72138037749383	2.078875532768	1.92936874996335
BCL9	1615.40408499227	-0.390993805459541	0.00519869496097065	0.0210548779502229	5.65442946893421	5.84592433033642	6.51397431382351	6.4533121489447	4.13904573682492	4.96534017560481	5.32978156147278	5.71617093581977	5.36103853100257	5.04830696302684
BEAN1	119.275854106862	-1.46636673029883	0.000498265174092742	0.00292241481436086	0.428874588539762	0.370390538868606	0.855052671929006	0.83136431907384	0.238840442661071	0.19984632466359	0.774900755504275	0.730627253049541	0.367419231018818	0.32603708017701
BECN1	1236.22312750768	-0.734104359895413	3.20607922543439e-08	5.45776906984817e-07	15.1698141745008	14.7029196283865	13.4820563895563	13.3898134018045	8.15689370250328	8.51478444712922	10.7991501975787	11.4491260982765	7.5707591615004	7.31181452506364
BEND6	47.0724032502129	-1.42891105972974	0.00188329268570045	0.00905615006259723	0.296899151949522	0.307383857191252	0.151578406621933	0.182389660069819	0.0754387383353012	0.0945697625630405	0.397938619052994	0.4891979715503	0.347583759096556	0.254777893926002
BEST3	46.7006269678175	-1.00924630003344	0.00700616578290161	0.0270439066184269	0.221679468291149	0.265194316708498	0.195988516624417	0.216975055893121	0.076502833382347	0.139859575233202	0.263334590547935	0.209759689868491	0.0824968577008774	0.10804632343075
BEX3	493.523151457104	-0.350904505617568	0.00745675167798597	0.0283759196143488	8.37368667956881	8.84965165833962	8.02839396668533	8.64828726425593	6.39301520793634	6.58314505215422	9.60795164259648	10.4668860650281	6.10305040085142	6.18755502226756
BHLHE41	369.20982355184	-0.686749009906924	0.0034586023684556	0.0149869933914951	2.84854703068877	2.7123670016522	1.97196288995772	2.09901770698666	1.35346441303645	1.57205968264847	2.96385225903367	3.34584938419861	1.98300780071493	2.02889967754083
BICD2	1433.00219502013	-0.966136851545486	8.82971809071899e-11	2.32195228418474e-09	5.18194425005538	5.27456146058722	6.42854984513025	6.15632016264296	3.02708312195185	2.73156662167878	4.37688749591391	3.91726407647798	2.3428845751636	2.39066109136669
BID	256.391694139332	-0.997294944623357	5.8692456831928e-05	0.000459396888903483	2.15130333870508	1.9224961324283	2.99686465513311	2.92517570607523	1.22146027597053	1.22221344892407	2.01584030464228	2.02324598820521	1.59507082281936	1.8174458289175
BIN1	581.799382935825	-1.21196568466365	8.84965057869374e-16	4.13586189777201e-14	3.9255873863667	4.13523220300792	4.02991546603764	3.7447614912592	1.82936954337153	1.514285221944	3.93037569139893	3.49153957722445	1.84990140440192	2.25921942772227
BIRC2	1737.39230154502	-0.381071356820103	0.00878260743392865	0.0324744512861257	9.55928444357666	9.9918712627184	8.3113727807456	10.2407756194174	7.56685140883385	6.72919109481298	9.63021104721699	11.4871352492983	8.63594655568489	8.79506214726252
BIRC5	3264.76886840398	-0.730559937908118	0.00134825212239975	0.00682610751280493	35.7464355526632	34.6678966695282	24.8544011580393	24.7653668877948	18.8946197869202	16.522575099372	12.4072315290995	14.0791443732817	12.5041737169609	10.6587541475561
BLMH	1932.86142133882	-0.432647355112563	7.31307372642936e-05	0.000555863011155992	18.6280551899343	18.3784728465809	17.1961848624279	17.7372050343779	13.284662294676	12.7637743183757	18.3975289262728	20.0325011864368	14.9003212929721	14.047270066117
BMI1	37.0090652104354	-0.959468619988047	0.00932138206706583	0.0341157936517725	0.322237311080754	0.241177486000909	0.277684570218536	0.26819747099031	0.148450396013476	0.131818669041952	0.327703052539505	0.167365110316839	0.217946508929448	0.206620617797651
BMP1	1069.93445483986	-1.25460372073419	1.87822261381322e-07	2.76461188243735e-06	8.21779145629221	7.72549616129844	5.62205313991257	5.45756691450894	2.95917676821565	2.58690500614339	6.94265475303336	7.33192188573437	4.13355234516495	4.4240416219671
BMPER	42.7169277169376	-1.30140980112505	0.000237721952108388	0.00155472274469105	0.212605839345795	0.199307030226684	0.251051924273091	0.251418469997624	0.0915704755108636	0.0898704104181866	0.216093879398287	0.263867846232236	0.124494363564646	0.150930385689996
BMPR2	3461.82868646923	-0.853376338643145	3.37836704878671e-10	8.12052510676303e-09	7.63444582295361	7.59096615669529	6.35063541802374	7.49449353829177	3.89517276322463	3.96715583471853	8.95681470890436	9.78272122369936	6.22363949547667	5.42918355311265
BNC2	2638.3739144793	-0.99636918530922	1.46750953371155e-14	6.12702617878288e-13	5.12279492970388	5.51320230416741	4.80205716811124	5.41799341190819	2.38673169469446	2.7178100385366	5.71864277434821	6.3017533184877	3.51471835831831	3.2858910772326
BNIP3	715.487565948539	-0.536916295909843	0.00069443316836107	0.00387804056841639	9.02812534801155	10.5920458000399	11.9187224273623	10.6797913630595	6.90435246615035	7.29106036952395	11.0920573139743	11.2492311747558	7.58431919713291	7.7188553513446
BOK	1283.78210073897	-0.765645688725349	0.000113963270232453	0.00081622717814048	11.5097628886319	10.7203614789171	14.5885769900253	11.7147260472056	7.98764452948472	5.96213466311523	12.1474819344964	9.92870833829099	8.01452283471759	10.4514359911115
BPGM	102.285364987325	-0.738772795587651	0.00233950126886039	0.0108415762377831	1.11918383321986	1.21404794013014	0.974927841335599	1.26333937638289	0.630636809372645	0.704806246880514	1.34687568657143	1.2147339067601	0.833537757335796	0.703714615324288
BRINP2	192.11013185349	-2.70453300102237	1.87077345536393e-05	0.000169205120688178	0.646575116082977	0.587901387646976	2.49574032514147	2.61316393253103	0.231426624091548	0.240726939464851	1.05524464427618	1.03713196770174	0.231409238543741	0.365826114276316
BRPF3	1902.82197016637	-0.776042002079278	1.52737844569641e-08	2.76009034202307e-07	6.91710080247579	7.63314323873153	8.67346088316702	8.46083128734258	4.53295818786183	4.49696518738393	7.55664224685138	7.61599998798844	4.63593665012903	5.00505256269846
BRSK1	459.107127265849	-0.520623488663343	0.00484361758185954	0.0198233909813666	3.19393177386822	3.1243269143383	4.26746594248397	3.73221894472883	2.44751226317144	2.4248759382455	2.72122511291191	2.69004377347738	2.15747867866359	2.13595153419513
BRWD3	2571.46222588026	-0.327345734259218	0.00210134402373564	0.00993121790616904	4.52746985031594	4.85367341180235	4.45414208303121	4.77288458374483	3.50066603882531	3.74126792327386	4.61204673613006	5.04963272033709	4.32259662831627	4.09550716470253
BTBD1	983.589224093177	-1.36553596582761	6.57024206701152e-08	1.05717894957695e-06	9.29279767902235	10.004278476364	6.07322613449745	6.97860281120264	2.95532100432502	3.18702016144692	9.37011270946319	10.3601674005969	3.94258842892614	3.83127379597135
BTBD11	18.9811701207978	-1.38267001213767	0.0126676232777444	0.0435279639225127	0.0874611722627648	0.101781120189861	0.0980810505240348	0.0616027645647891	0.0246119756544082	0.0400666906973509	0.105989472218113	0.109257337072425	0.0615253167996639	0.0727943557035373
BTBD2	684.89648002943	-1.30183990363762	0.000164988665438788	0.00113286644441388	5.37261371558264	4.76844353702333	10.2658068094858	7.81824312158249	3.3804880732124	2.20402694405261	7.87599109046795	5.38594573758584	3.41882126704113	5.82985045269978
BTBD3	2200.95305102697	-0.333063498270687	0.012099241765267	0.0419556269754456	9.40106413416772	9.1107506429889	9.84234328396848	10.9556152978717	8.14923671747065	7.0910928858662	10.0757058587222	11.1983340132745	10.0165040653317	9.09675922944456
BTN2A2	219.633471937188	-1.42303815816235	6.59960147996606e-11	1.76983833296076e-09	1.51699584260387	1.47381844087198	1.6658459070401	1.52706750461202	0.450174486105849	0.671783469786604	1.18789204995234	1.30451889347816	0.765864330090161	0.737531176344505
BTN3A1	95.1854963356486	-1.22177254962676	0.000248002160892888	0.00161595786714933	0.646553076504421	0.729724812852509	0.573097303738607	0.466433862247821	0.31820076135872	0.190079731943895	0.646315313145435	0.697716531906478	0.44351925527531	0.404638205815849
BTN3A2	113.437486893006	-3.00215720761594	1.01462903102774e-17	5.89991712794647e-16	0.995196581238673	0.937001850951753	0.723691235343707	0.693101140266068	0.0941627107399396	0.109742241459684	1.14495263557969	1.23660270981371	0.240293031722463	0.190447037885093
BTN3A3	20.7746463136483	-1.77889247501764	0.00809597174557924	0.0303689431946691	0.243473346034291	0.233810649017093	0.144842710604823	0.159601468031167	0.0161538294573847	0.0932361671993378	0.184143052753438	0.185250793012882	0.0403815398182116	0.0674511010798462
BTRC	1409.76205514826	-0.439250491882135	0.0110388389868778	0.0389531952953734	4.59557144884998	4.86797640281199	5.82135345994738	6.38002363156823	3.83922330680753	3.95398979797697	4.29275973453016	4.81955313011271	3.74322374145949	3.41641358954196
BZW2	2813.76594655288	-0.956674252007866	6.82150018615037e-13	2.40857739037642e-11	38.604543777796	42.3195491404265	35.5964043296692	38.0638508948206	18.5379380449788	20.3693742580079	30.6847344541198	34.9881487853181	24.260178440966	21.7704550831938
C11orf44	152.99694822263	-2.74171232438726	1.72958732717192e-26	2.22655571673155e-24	1.16601745530353	1.41346725270714	1.28424986631022	1.33457604664564	0.177733112039441	0.200310861611537	1.4545934068455	1.50717660927592	0.410122523375036	0.506648667407689
C11orf68	728.442104266122	-0.877103909814159	5.88477994022504e-11	1.58780915416271e-09	11.705404762911	11.6007149454395	12.9709086625717	11.2923099166403	6.5208281569377	6.13574446657406	9.50896759242874	8.11765768438431	6.5618360678585	6.98571312098286
C11orf84	511.394937930763	-0.999781864123452	7.16900514758662e-07	9.27391348717538e-06	6.27181488424775	5.43669580138785	8.00589840604032	6.28173836105493	3.33127156248756	3.021437402607	6.22959501419775	5.74801736439758	3.83662275439671	4.27232229342151
C14orf105	73.4636791308606	-1.73322087833879	1.28076879901128e-07	1.9436576632024e-06	0.492795373048463	0.742962536216347	0.531064386152763	0.589858644162928	0.179657836535735	0.165665525926193	0.456857392037868	0.373205952303303	0.380016873148185	0.389511366979614
C14orf132	712.856297380957	-0.669777824990306	0.0128868201757316	0.0441307841936279	2.85431660092457	2.53964643178082	1.81572680761094	1.70257491514133	1.45660377540184	1.28793175853216	1.89964757514028	2.40882237355236	2.14976920365387	1.88133371480769
C14orf169	633.889315159833	-0.370793373990981	0.00309963401203237	0.0136736233495239	5.67748043294486	5.78957446687758	6.24188577647881	6.28218797547677	4.36208375968286	4.69341403739053	5.27860336529761	5.69148606066186	4.41251223568153	4.6253130396174
C14orf37	469.497318080285	-1.09590578955967	1.33283116074268e-12	4.50732288313344e-11	3.54254479809931	3.66795342991907	3.0931458039805	3.41849619285307	1.59483498652902	1.54217066076301	3.68737054119899	4.6498568614103	2.70290707991686	2.24328488470109
C15orf41	335.885122046649	-0.591575244093746	4.18999075951516e-05	0.000343045758326662	2.2554455827096	2.41394031442885	2.52761821095025	2.48150537803756	1.55898573907288	1.57570503843432	2.1565924990074	2.53544195037485	1.59239267921561	1.71739996467218
C16orf62	587.966393532583	-0.412550248118479	0.0125067450363615	0.0431341719381532	3.22753845365875	3.21234027263837	3.94012770038933	3.84381650837277	2.40974564253	2.80326245078687	3.24145051695418	3.36767753314972	2.72399100455797	2.61300265111591
C19orf12	1278.27174821037	-0.644372492773274	5.09581403275893e-05	0.000408105215650817	5.11653125816223	5.7093328001502	6.7260262902698	6.67684316300608	3.77673165383831	3.785790109608	5.70829246739459	5.62317374360702	3.70079418468196	3.87897208841702
C19orf33	717.788659265806	-0.639744083692148	0.0108892211748571	0.0385555787261911	33.6429228182907	31.7302317841604	37.6501633607511	31.4407690119591	27.0749300976522	15.149485278295	35.6904914686154	28.9843850075771	25.0331573875742	32.3284228573266
C19orf66	92.5034571055736	-1.12186285576972	0.0100868552975301	0.0362271679339151	0.659640735692014	0.798413694341808	1.64869028504662	1.47215497054517	0.499701879477057	0.524393393784379	0.794025993468469	0.646996476665403	0.577263726353672	0.675751036895598
C1GALT1	2950.74845584903	-0.710036975835625	7.44206473310173e-10	1.69355560753457e-08	11.5559659292341	10.8116873889671	11.7554218743102	12.8073573455137	7.23869233684867	6.77290535212186	12.2134820961376	12.9864689186819	7.7324832480708	7.82827778373088
C1orf116	166.979537373311	-2.06056906002108	2.11648858615904e-07	3.04909340961048e-06	0.560536338757192	0.665195363887156	1.18919899470733	1.10419617178024	0.255601614849327	0.156527681644388	0.686559288107313	0.684711746644511	0.572857133022728	0.634845791324845
C1orf21	444.854117408125	-1.92524566654195	1.69335703546883e-24	1.84168256839045e-22	1.07743701677894	1.14784839881949	1.30364193962135	1.41487413639697	0.291677857385164	0.342547802490341	1.08328563990974	1.28959359640142	0.740900184289783	0.692443659470302
C1QL1	435.772215415167	-0.707346676412623	0.00452155385180087	0.0187845454644847	6.45337386575046	5.71546791370155	9.45556205734727	7.19324242020385	4.83321500442987	3.78934733939266	10.2574636898991	8.27606523424243	7.05801116088423	8.52137864567147
C20orf27	567.491187471218	-1.07068595133816	3.07782472077075e-07	4.27330132035145e-06	6.37216849120681	6.11094873470599	8.83076289002203	6.5713524308423	3.4622155926362	3.02375969959863	7.16637363292468	4.8787882828783	3.13170316551663	4.52959172576838
C22orf39	654.498305334221	-0.473959895559029	0.0135574539800022	0.0459671081701942	6.02341351921917	6.49873670618369	4.89946040109962	4.9202639716501	4.03099238103858	3.83449543075477	5.42542075858734	5.00500930382081	4.3527965003329	4.15337117984094
C3AR1	199.547796694077	-3.05487463737315	6.35988667141113e-21	5.00244835998182e-19	1.23695528928288	1.46107320638908	1.90792745889331	2.17553766611259	0.181700318184688	0.215124555638823	1.05864622984295	1.10534482464145	0.196266462609839	0.252899507212779
C3orf18	185.007919415893	-0.936780401281621	0.00178616410407741	0.00864844345517347	1.2233597198635	1.41876712991927	2.29980956780708	1.78972242314545	0.814805557649725	0.898685938451325	1.79246901545337	1.59913011533276	0.929094430459572	1.01172476189034
C3orf52	410.874672469121	-0.753232388186874	4.73069733327501e-07	6.34323868454888e-06	4.21140650103337	4.24860256400677	4.54141258532526	4.79331289564037	2.3963124176601	2.75312651495654	4.80832338546776	5.21775875524917	2.53100242395639	2.4795369760416
C3orf58	370.145580456403	-1.18130070963786	1.77775074377888e-08	3.18314942628457e-07	2.34433001872492	2.34686957163233	1.74462686769937	2.10301152138385	1.00830775549033	0.834401938735691	2.15036962174381	2.41379898039827	1.34606891122313	1.42729276097866
C3orf70	265.923323734264	-1.23255085149276	4.5213176052945e-05	0.000366763788617329	0.870051837518004	0.926078545404836	1.5368678750916	1.49071503559783	0.493073675964097	0.507155258907946	1.25217067836352	1.45315303004189	0.797760665720081	0.677705822313768
C4orf33	40.8350108605716	-0.896607704237179	0.00802193706587081	0.0301297184318008	0.5135349687408	0.502904232172678	0.585806877032193	0.542218073798889	0.274399051616131	0.287957792111535	0.710902063227649	0.885898654917836	0.405331783165001	0.390602248151424
C5orf30	216.289886773313	-1.40991181420117	1.21664133387928e-05	0.000116184301688992	2.08431219873084	1.87577797790345	1.08797017216237	1.41825860017554	0.65369903865815	0.538999949801069	1.48527878220252	1.85563476163532	0.900436128865288	0.68238803759582
C6orf89	1874.19373664967	-0.760137662577398	1.21942508161672e-10	3.13650372452627e-09	6.01374956407956	6.31630657682171	6.59867979899031	6.9654604784903	3.5471011187251	3.91407425265979	5.46764705298974	6.1731129127444	3.53343772824026	3.12585397957035
C6orf99	22.07707334001	-1.72088432015426	0.00694064314991133	0.0268291337556577	0.59120151831348	0.831331485836468	0.387349853384552	0.293340983895651	0.164944884459418	0.146465187824392	0.767774228285862	0.839004784791446	0.326428892878565	0.129137886123532
C8orf4	3.15897254399954	-4.5694947312091	0.00955230632568066	0.0347301042410581	0.0290499722365208	0.0544657071738429	0.0562346831736992	0.0832805835141012	0	0	0.0300270203349169	0.087699635990644	0.054872977790273	0.0687426009783061
C8orf46	232.219475091188	-2.83966779072067	0.00465199702900364	0.0191862208927938	3.3647497135529	3.5160089694678	0.609515802350568	0.553100845055773	0.2799064705978	0.273401683938864	2.55791794843636	2.82682207160146	0.897965796550157	0.964229549722373
C8orf59	836.203378184832	-0.546617783323235	0.00416626681173511	0.0175443247982698	17.3925601423843	19.7172267699567	13.8849387016435	16.7330900068476	10.6360342555538	12.0135916413136	15.4225841621389	18.5726047419245	13.6845459835606	11.4005964408351
CA11	316.466613295664	-0.729676415167159	1.23216710279741e-05	0.000117348930725338	3.2549297075686	3.30951843021847	3.22382697178481	2.83782682173209	1.79030065604267	1.92667549039782	2.89856337869718	2.85073086428015	1.86475641940091	1.7165181942038
CA12	104.441026363853	-3.18659187175425	2.57699649632598e-14	1.05102086270295e-12	0.598369515781044	0.62427262459529	0.37471870229127	0.379445145861	0.0600077909123823	0.0466241850800615	0.661247780834598	0.757535845173941	0.121881668441263	0.133112896075362
CA13	581.394339324791	-0.897718459667699	5.07927934341935e-06	5.31108740366205e-05	3.99546762116244	4.39581349086655	3.30860077101077	3.68384532097439	1.77999277260603	2.25077670347724	2.3373795961512	2.48965098643738	1.62472410659853	1.58891523076819
CA5B	110.835623218308	-0.533190501978092	0.0146316459711144	0.0487881493206649	0.425578240483566	0.432204167702779	0.415347952866592	0.495645110720238	0.293438918291448	0.303395643545387	0.336028508400974	0.39852221487393	0.448834031266367	0.386043495122601
CA9	88.5107766663712	-6.35140091469593	2.70663393812373e-10	6.59587598282186e-09	0.963621601575401	0.88721447552887	3.17112951222931	2.34320425574304	0.0156028944758909	0.0277096301289389	0.438728130449064	0.323233293010562	0.260028705564717	0.228027258380291
CAB39L	113.328936915512	-0.779840285883053	0.00653346664417836	0.0255126659582842	0.725715981071513	0.834394157092865	0.634654723204783	0.523180950204696	0.354181221012357	0.417615179938944	0.65746183916433	0.734589455775081	0.425759644916023	0.430335925118552
CABIN1	4656.50423338835	-0.604281759607722	0.000327970089572955	0.00204766300786176	12.8887725850605	13.5639476009991	17.7968285193414	15.6509919594778	9.95335003618826	9.27558760122227	12.3573064554185	11.3278111643723	9.70101553059726	10.4569492719199
CABLES2	163.157387794458	-1.75092115167966	1.59457498539257e-15	7.18537510681116e-14	1.1774768579356	1.35108050522042	1.10502861019824	1.22534121956306	0.339520632714221	0.364054025641182	1.52865167354353	1.47876029108874	0.576501158683456	0.688780883767997
CABYR	85.6799792083983	-0.807341546278628	0.00284962784819992	0.0127208303053336	0.904697984507355	1.0531830342774	0.775168440519985	0.853015406857958	0.544647459583553	0.456759364858346	1.01177568852313	0.999952579084671	0.605118382034632	0.789653463400966
CACHD1	435.69454629523	-1.54619524717351	3.70842608571399e-07	5.04936315333809e-06	2.40213332896139	2.70911011821359	1.55787765930312	1.54355142893929	0.725582618453921	0.651654877223468	1.99453250275629	2.24856621231347	1.12975091452082	1.2335229683414
CACNB3	831.649276543697	-0.944936339355537	6.32291250697971e-15	2.73047537893322e-13	6.44196679025361	6.64859604375922	6.98294308683483	6.34487027052442	3.32036346858787	3.38096889210951	6.27130331011611	6.21642069282801	4.25943899476419	4.37368264458692
CACNB4	370.699459066678	-0.704073191597984	0.000386679922734116	0.0023557792388148	0.993293234468486	1.18437179875542	0.834341418250277	0.97417116580791	0.605711582879649	0.589296884736262	0.750512442117167	0.783279895770462	0.660527137736064	0.681778469500668
CACNG7	141.159369135737	-2.18057483959976	2.77308424716646e-16	1.35719364863405e-14	1.74088823670541	1.62486649998623	2.09263524591036	1.56098266853129	0.341214343075751	0.413162992519552	1.79944015294631	1.4994165293684	0.31017155445869	0.442538188865119
CACUL1	3697.47811054884	-0.661706790369846	1.07053220050369e-10	2.76564616432178e-09	12.7169457295147	13.7203661913979	13.1391536266567	14.4078297734053	8.1986172963506	8.4620153611842	12.2944120045158	14.3435732922674	8.78614233946461	8.5584313835614
CACYBP	1119.30417338856	-0.519856218919144	2.08429036549694e-06	2.42556882098352e-05	7.99122818971625	7.95516425235377	7.82003745139794	8.64879536791828	5.58812370554097	5.45566256185697	7.20943474451955	8.23104073789837	6.19230712191149	6.14641800077554
CADM1	588.16946644448	-0.467493885977653	0.00941774742833297	0.0343827791006628	3.36741231046661	3.45723989222059	2.79907431603694	3.09674793801539	1.99758240364667	2.49407481761139	4.81842105580585	5.39326592938458	5.06715109819325	4.75805808189699
CADM4	1347.00884573722	-0.752559414062254	0.000529995282766296	0.00307778078017778	12.9688145280039	12.4302395327092	19.049922752666	17.4563049472903	9.11487250767793	8.80608479920273	12.3041465481547	11.6820760472776	12.7576344670717	13.1905804785665
CADPS2	392.972154816784	-0.799312673561171	3.67070186610314e-07	5.00573499836465e-06	1.57193740572263	1.44479678917786	1.67616845646406	1.80005716401255	0.899802783499308	0.922730683293667	1.07412749178909	1.23425757180856	1.24078525089812	1.25100471752773
CALB2	1863.83569473763	-1.60202397609931	7.71811614375449e-23	7.31104776004356e-21	36.9160877276098	37.3884555638759	34.8852182455931	31.7284850182682	10.0849929799126	12.5899242084067	33.4287540103225	36.1719838470383	11.0029845731129	10.8549667655097
CALD1	1834.59401189243	-1.31115272758882	3.58648571835438e-09	7.33917443341299e-08	10.2895395607378	10.4897034759277	7.08112318902998	7.97785185115699	3.75637559158207	3.31206575932204	12.8410448845602	13.7722567545111	7.2215629261244	6.7897538920584
CALM3	6040.32624711136	-0.596587065304674	1.14419714908435e-05	0.000110161800927416	51.4640012151087	51.0429005826813	62.2351488070656	59.3054637699222	34.6384257364778	37.6720180299361	56.5713600526241	57.3993987633378	40.5931852371902	39.1959311962145
CALR	10196.7611524515	-0.471887671766191	0.0073356003796248	0.0280116911765517	142.643982903849	139.191453983602	113.767089805253	111.399372619244	84.5152211833987	94.2785147472699	158.125332115037	173.114262784213	107.533871075883	101.270592543644
CAMK1D	629.905357948596	-1.2966656702945	1.00338449875973e-17	5.85518727850292e-16	1.83779355527165	1.68513801817614	2.03412887549158	2.09028886982896	0.760279455032549	0.760095844460645	1.29688549997846	1.51350179630504	1.02092208766361	0.950662254851195
CAMK2A	8.22267199222916	-3.45877519862741	0.00462369665064175	0.0190918470324952	0.0799743050247121	0.0306702794373098	0.0379996927204332	0.0586203434375486	0.00494431036205841	0.00439037165786818	0.030059676148223	0.0438975067587753	0.028839643751356	0.0206452085482971
CAMK2N1	883.623162795972	-1.37921148103973	0.00016517821325711	0.00113328463371379	7.13534949001505	6.10968664799411	13.4309042005308	14.2983038150549	4.10474921743203	3.56244952588778	11.106110572329	9.80527025703137	4.52038502857129	4.56481279813272
CAMKK1	447.657797719638	-0.608257262853874	0.00246867969556137	0.0113093259376224	2.59628115404325	2.76475301371214	2.23268550024072	2.15659216407938	1.75206891700618	1.37755915581948	2.55581219617307	2.44008595958577	1.55486694973114	1.66475202460457
CAMSAP2	2740.87266338889	-0.619901858661434	7.85983265545024e-07	1.00568185589236e-05	8.48881763607632	9.56500349590414	8.45824743095157	9.73811597611793	5.52348800218523	5.9916711757636	8.45008907016513	9.42865128047924	5.68278164830842	5.10468709576561
CANX	16375.214748731	-0.454127133658792	4.7269693007577e-07	6.34306718279131e-06	78.1650908991841	79.2042514356656	75.1718229297004	81.2129032812293	55.0918913092356	56.7749665072226	70.229471955593	80.0280576732095	60.1963616705532	55.3263227999792
CAPG	470.523386605061	-0.770647943217196	0.00255994156086801	0.0116516689126669	5.83502245197746	5.00790969033491	8.03919859878926	7.74384881790446	4.36498897683718	3.25628811485876	6.82157869646309	6.4590111016992	3.64861948936858	3.27100726905678
CAPN1	2350.25846649514	-2.39555831877782	1.4578162363938e-15	6.6199134713975e-14	15.4234771592749	14.4193590621405	27.8187829298068	24.355332488038	4.1613016023128	3.43522736965575	17.3959513696515	15.5630122328137	6.10230804043579	7.31687583690565
CAPN2	11578.1816420644	-0.922953196505705	1.02967901909568e-09	2.29935546735701e-08	68.3137130945661	73.5220225154887	88.4280117666485	88.3736872595662	40.7259408578604	41.2641596416838	75.3477600584483	82.0680398024066	40.7228813879548	40.0073121229221
CAPN5	510.152229595395	-1.32038794841346	3.45931885662581e-05	0.000291486078119991	2.19284277898366	2.25553473395687	4.23073632780565	3.89410712957058	1.22615292925937	1.22610379329075	2.14067347476514	1.90019207502735	1.40831310005645	1.57977700145289
CAPZA2	1221.30344873384	-0.717719305004087	2.17061723540462e-06	2.50616678051074e-05	13.1205506608393	13.8532809542628	11.0031511678201	13.4707757765867	7.80099689973477	7.48445813146943	12.3495637330734	14.1094213510805	8.60137653380546	8.16484699361687
CARD10	1743.48056208346	-1.1367458596186	9.86682556442728e-08	1.53166167065766e-06	10.7400928773689	9.91398100606969	14.5666809887451	11.98361994294	5.994872964087	4.48940781279324	10.3026282697913	8.17604479949401	4.6999838402404	6.02427079539293
CARD19	370.02515808525	-0.794657401408449	0.0055049603716021	0.0220837652065705	2.91675829919529	2.99377090685842	4.62414307456049	4.29532787830644	2.52893601913616	1.64563433963202	3.35228811140101	2.67806246448341	2.22793464450591	2.15627368454038
CARD6	314.112036965748	-1.42558044633931	6.45914890622997e-18	3.85775405352088e-16	2.11469900409188	2.16597900201939	1.91035409085726	2.1751767368196	0.781203450830009	0.740977287780367	1.70908004929633	1.98354157584209	0.724926012225932	0.698107371702219
CARHSP1	1158.55665765423	-0.358227225703722	0.00795598507261974	0.0299138926578078	6.85101033853191	6.79748785334642	8.01292096107517	7.34458762294176	5.86460849609809	5.19020510651342	6.30891287397702	6.32533068096132	5.65783609248009	5.63223038516952
CARM1	1076.88696151044	-1.20685071180687	4.27498357408039e-19	2.9194161082063e-17	8.68525655786508	9.45111687744129	10.652785376057	9.84075979936732	4.16641441641596	4.00430296523667	8.66074163174213	8.06308063161151	4.79918546084126	4.76713724906964
CASC15	21.6100082670124	-2.99661309265584	0.0106521111909007	0.0378309911454301	0.670046042175378	0.557358047921635	0.0219222978767137	0.131892152279181	0.05134335207101	0.0341933021866367	0.556016487186373	0.71225970468844	0.0534786406097897	0.147390832441681
CASP1	8.72737508472069	-2.92786736813254	0.00760786396515904	0.0288388457835923	0.0532944682485648	0.112411846308346	0.165067147739361	0.200530059743315	0.0120811649305104	0.0214552890983414	0.045905783455059	0.0804459540900726	0.140936335781415	0.0504454921379418
CASP7	1545.06153656455	-0.584252678816042	9.03981879347403e-06	8.93757646479039e-05	12.9336524952477	12.643334333575	11.1393907576273	11.7480550782807	7.80008520060032	7.99819257003013	11.4562936255574	13.5256360107291	8.80546479449281	8.55975844212805
CAST	3933.33881183903	-0.551759957062218	1.37789845777903e-05	0.000129188293968419	16.0729374166387	16.538002920868	17.3794078795671	19.3783545771212	10.9327926430029	12.1604607148438	15.7658611521395	18.4470444037662	14.3030313212822	12.6832357597997
CASZ1	159.747505531989	-1.02685640176862	1.45517467610127e-05	0.000135942325653384	0.516664240741842	0.462863035272673	0.483945549714995	0.474812222462393	0.283357461908782	0.183676280301922	0.669705134968525	0.433968176551576	0.377781566855272	0.56496504673607
CAT	774.205371208942	-1.22154999620652	1.84694899348539e-08	3.28700952689081e-07	7.49509071364485	7.7492328120553	9.47956856209458	11.232323865667	3.39456572217482	4.11885580368767	6.69766178970762	7.41757166162781	4.91929088544869	4.75407091037031
CATSPER1	166.069171386506	-0.560130022686696	0.00323599269857221	0.0141828247154586	1.52472238141598	1.39744363959799	1.63652590352161	1.57329630410624	0.953581708896544	1.07693017255987	1.23828878972107	1.10280683073535	0.624873105846759	0.86013031139324
CAV1	2523.44163211688	-3.40349173898251	1.51400797984247e-136	8.89176886561482e-133	20.1370045018116	22.5596869777195	20.0603288849389	22.538980398482	1.84271122151957	2.08947124839144	32.0928787867199	37.8748920357003	7.5613973341269	7.66665293976906
CBY1	248.676483143046	-0.505877852901413	0.00952268930144689	0.0346581827726075	4.09236155008673	4.1582661983857	5.09501260836953	5.39390727410641	3.27866859958485	3.16523706612005	4.30243293963964	4.76692872923359	3.54209385549561	2.90519634379795
CC2D2A	465.291299966964	-0.675483320913117	3.46291351845139e-05	0.000291649489873782	1.8013247715088	2.0013620714333	1.62403274650112	1.72433694842388	1.04730870891986	1.13812563618477	1.42803851473472	1.65323774012053	1.10267903443513	1.0380164905498
CCBE1	772.459487931776	-1.56863768952022	4.74421137436372e-35	1.31826811373449e-32	3.32049226319217	3.39176708347711	3.4829085771274	3.47479421072559	1.20459828799221	1.04900426455377	2.2753590228689	2.5734223786507	1.13931203499994	1.11190608020102
CCDC102A	237.675250958452	-0.814730393042584	0.0103587120661949	0.037008411884577	1.95223627062682	1.80604047022775	3.30744208056309	2.81674973585104	1.62710760664146	1.11684981839579	2.3440978497192	2.11964656554909	1.03142221999792	1.49010978685482
CCDC115	233.624579527887	-1.46990612102896	9.65196965520147e-05	0.000707817807634803	1.78341619431783	1.661789427447	3.60206077910517	3.28013911763108	1.01312872383109	0.804469900661815	2.38383255773127	2.16224762098267	1.136437227454	1.17962192804525
CCDC126	166.668553702946	-0.708337856170643	0.00148526668397433	0.00739861851991622	1.7084508338485	1.74349728144073	1.45684439949565	1.76692571617858	1.15694863155401	0.844499439218762	1.87022723461142	1.95135925919983	1.75653438771184	1.48406741756198
CCDC167	159.109726600371	-0.862454938889082	0.00153849138849172	0.00763353415202353	6.72825469874179	8.40985657930052	5.47696789759225	5.40946007936604	3.48060310222995	3.50736878004636	8.17308049465595	9.31693899901895	5.44210722667293	5.63374442559564
CCDC184	120.225726156557	-1.49411275403859	7.24473909359859e-07	9.358142088718e-06	1.18643854187142	1.12291953127556	1.76669030243652	1.56982478753714	0.558588947456852	0.422524573408078	0.927618009601348	0.77298815015815	0.448216715854814	0.550709176489261
CCDC47	3619.59892777596	-0.782313541418259	3.10961929161756e-11	8.72426469729456e-10	24.7252507286941	24.9358671286092	27.1492398872901	29.4565025439059	15.2048404051787	14.9560276979206	24.1663619044198	26.3556145390345	16.3335749890185	16.0350048620473
CCDC63	8.40101989242109	-4.4928274189673	0.00388171665460599	0.0165397740598556	0.143116906204876	0.188669154993185	0.103891672576799	0.0961612859065858	0.0121660301131633	0	0.203404311357218	0.189025791773111	0.091238371199903	0.088899738967128
CCDC69	570.520772881954	-0.522261053522573	0.00310454860605532	0.013691875316668	3.63987577011668	3.93828404886451	4.20325717497608	4.35284995147776	2.34693422980607	3.12915828462244	3.11175574253193	3.6786687526255	3.0969120476785	3.03821667476511
CCDC71L	86.8063522944088	-0.873463249617306	0.0113186433520632	0.039773270287196	0.34654655698609	0.413642053809576	0.655240833688483	0.584825379285634	0.279518941860818	0.253069596683917	0.628936212320968	0.527153754310851	0.283151511344365	0.434818705175437
CCDC80	467.905248679078	-1.61603561568945	8.01232716799792e-10	1.81606890506838e-08	3.39742055750682	3.17072021841037	2.16196101220747	2.29800371792617	0.823324211053801	0.93669958299831	7.61778028879894	8.87835148157576	2.15677587064015	1.90692150179868
CCDC85B	98.2184082423634	-1.41286966304887	0.00235377608442076	0.0108934018469686	1.93897560901414	1.70917102682463	3.14281585587012	1.89782727459762	1.20053634654838	0.401947077949893	2.10888635431766	0.90279688413096	0.606782894178576	1.93119838793828
CCDC85C	1116.23941007256	-1.53070571419691	7.43221252001219e-22	6.45064790098989e-20	5.1994105777827	5.64037489743383	5.74324194533357	5.13340687059007	2.07366346985262	1.60215508049697	6.43029531769799	5.98508819711992	2.83949420677759	2.9011050418159
CCDC88A	3331.011997711	-0.801095119167677	1.30483033492629e-05	0.000123468344098101	9.32030991205906	9.67880197070343	6.92718259693583	8.17087324946505	4.76984108272178	4.79915211400632	8.96362332534227	10.3714716839689	6.88705735465348	6.94145080797998
CCDC88B	27.7899695460047	-1.73395617950494	0.000420375356052064	0.00253043846883544	0.177545321509777	0.142662513892137	0.18938058241972	0.124650044105252	0.059138775647645	0.0350087522116838	0.149809605519192	0.109386876598086	0.0574917125840039	0.0411561393174184
CCIN	180.819282753659	-1.87734318533496	2.0821109299597e-07	3.00941037530435e-06	3.44979509035434	3.30281393826601	1.74766860345198	2.07135270151741	0.711308897007444	0.698102987360623	4.58056554518256	5.1888675462133	1.3414028432768	1.49807923480412
CCL26	11.1299246215396	-2.4700422478662	0.00458333642062784	0.0189741081755268	0.539250878461679	0.802884610465661	0.626326291561304	0.375114567781153	0.172575786587434	0.0383102893419672	0.557387695979771	0.478810883329702	0.107851763820526	0.0450374122423706
CCNB3	137.347013514298	-1.177906729747	1.0037600109761e-08	1.87343724929956e-07	0.778523371079927	0.79465780690021	0.794074615297761	0.862443735109744	0.338628812897067	0.357964685383267	0.702587456077153	0.743665868213282	0.465803583224865	0.482542276324154
CCND2	45079.6613212302	-0.503410799374607	1.58716404697322e-05	0.00014668741208588	148.667664800551	160.315804726036	175.797679733126	177.206679680575	111.323077917382	116.6047492421	193.171148247878	211.881876810988	151.773361098373	146.324273573555
CCND3	495.150739216691	-1.04083244753863	5.03588467567517e-06	5.28138405361433e-05	3.28792811888374	3.52107615522998	4.75554353373859	4.7775944617437	2.14010899915663	1.73687047314056	3.91732450294033	3.58107925905612	2.53112155876681	2.21801775179336
CCNDBP1	317.512414777282	-0.86013468858233	2.00302550771082e-08	3.53266330534103e-07	2.05621009421096	2.14278537499986	2.24074413317798	2.3943053677313	1.20902340789788	1.16794952241555	1.51956192469509	2.08392489071905	1.48902410510132	1.331429296055
CCNE1	1174.29684848428	-0.359043757833991	0.00584371966672789	0.0232154446015961	12.4223928908612	14.5331965839198	14.3647818187948	14.6382549877744	10.2020434901763	11.0844045442008	10.6923159399319	12.4365496755567	9.56498843104423	8.00998205319602
CCNG2	1509.81786068179	-0.981434161119523	1.53270553624504e-16	7.87310170352809e-15	7.3209892521589	7.16224049336034	6.54757243449516	7.45731299212985	3.51699616812831	3.53202111507976	6.36885132590508	7.22624813945927	4.91264718527326	4.36955046909036
CCNY	3280.79539047093	-0.333416744352886	0.00479552636852101	0.0196814300225883	14.6802403811683	14.9126033287735	14.4418300355242	15.2773800033534	10.579346764336	12.405061484394	13.211646872692	14.4649262821268	10.1710783538442	9.54779084562719
CCNYL1	922.142462077098	-0.672035758533461	1.43573076041575e-05	0.000134339565946708	5.17352200948082	6.05704690150583	5.35772888486084	6.66436313536391	3.57100824774939	3.55077902929422	5.97886266854365	6.79322989916892	4.47892298036364	4.21958290552248
CCSER2	3330.27074957668	-0.349437855166667	0.00376971663252837	0.0161288580253806	9.68380226768366	10.0209471001547	8.97243114930762	9.53751733301813	6.9028823239287	7.74827966773962	9.22466517244198	10.4868253275899	8.35856495622104	8.09327858169751
CCT7	6532.45809220539	-0.476313871766725	2.72924496269869e-07	3.84385027959938e-06	76.5631032300924	78.2013034970173	76.7595289003646	74.5565376686752	52.8849665378192	54.5994397589991	63.9489432032114	72.9761196857305	51.206587930733	46.3993950092474
CCT8	10453.0861037934	-0.422357461690776	0.00933152965674406	0.034131663072903	113.253427017639	119.589306276609	90.2639393508681	102.207517103879	77.5586521835994	77.6116815904961	107.152760202342	118.749070197066	82.4315146174364	75.1458658747729
CD109	4045.40871835704	-1.37804861894535	6.70607303599734e-19	4.44189100831719e-17	10.5446712544729	10.9769375768446	12.41476997388	14.1145951490715	4.62791771366095	4.391699369957	10.8530209496928	12.7004939908575	7.20050252789236	6.5870056997996
CD151	2646.37057974626	-0.592496967656596	0.00109319454065679	0.00571882262821616	46.4376652702387	44.940862798719	39.4195254397003	35.0511860223306	29.0211419759851	24.7967737744164	60.9064539520766	51.8611020520477	30.2215635175281	35.4092915745772
CD276	2239.71053848143	-0.716002056752957	0.000542286266883141	0.00313263663482428	12.9482941283957	12.9833163453169	19.0642412332089	17.371921482887	9.62404887619393	8.89560626051084	18.137537063506	15.547521393808	9.61540265759695	10.556895584828
CD44	4497.46278218132	-1.03691777041355	0.0011510751149003	0.00596318507775017	11.9407261666914	12.5752126062668	21.8590226009464	23.9834440487934	7.49046879395741	9.19506606832123	18.0733915373671	18.976379004399	10.1807779831243	9.61576402376439
CD46	2820.41199571575	-0.962977757552727	1.76599310616343e-13	6.66274786670097e-12	19.7920152086616	19.9478846632052	21.6820022264096	24.2993192742845	11.0336606354215	10.4320509906116	21.7882242538134	24.2946544258137	13.8744052119487	13.718531160009
CD59	5180.58062632003	-0.476298114289328	0.00286795020709996	0.0127828015934465	13.745322733858	13.2567930319864	16.7669317431226	17.3670448052993	10.3049316566021	11.1329131863063	12.723007186951	14.5735810780116	10.6847372023296	9.1533189402946
CD70	292.359134199124	-1.37059504405265	3.29413082036892e-08	5.57534014640539e-07	3.34986591720276	3.3411617159485	2.53353425920278	2.30314334041888	1.05075777998857	1.12905138232583	2.14059704725293	2.18200129371332	2.31031622455457	2.70070303142833
CD82	372.869730461815	-1.90243583490216	4.1305022890127e-28	6.38379998509779e-26	5.99855871613451	5.91488400294365	6.80799488561394	6.4600935779267	1.82102663984203	1.47695114298139	7.20282102751443	6.08943998547455	1.70857773530463	2.00572291020015
CD83	135.812065866313	-1.23373184312418	1.27813904937719e-05	0.000121268346316514	1.51327961945141	1.81968069654792	1.14985539398566	1.26195190427461	0.577078096363375	0.614909777046156	1.578794763758	1.47301296578812	0.72930780183913	0.662644861124162
CD9	1720.29043591267	-0.746936625465553	0.00954810687943259	0.0347220010544319	32.2371576627037	31.379566161535	19.3991849299591	18.811305428375	14.5625714867109	15.1609777546723	33.7601296380555	35.6973653980084	16.7647007195212	16.0001840907056
CDA	305.721280201584	-2.30950829439613	6.68911871564652e-24	6.93268133241035e-22	8.51383298242792	7.81572958946986	10.8385989499136	10.3718520145294	1.66871248073543	2.02057813859927	6.43681417666145	6.95878474191456	2.73884249729845	2.69210075013728
CDC14A	298.136699761648	-0.539804631190276	0.00169877864011488	0.00828877896986542	1.31389847750426	1.30079389787063	1.17277159735216	1.26417838266376	0.763446744904251	0.931657717168979	1.1733372902986	1.35058639264255	0.909812311016518	0.943876419385226
CDC25B	1837.84887814873	-1.14638867962441	3.1726663509387e-15	1.40804051479065e-13	11.6371258737288	12.0663014766259	10.7295724010242	9.94875111689677	5.02253209065202	4.78014903453422	12.4081031610914	11.9897430682746	6.30775241385313	6.6739074350205
CDC27	3025.01082468788	-0.659737574102624	0.00376854424226448	0.0161288580253806	14.3472276013813	15.3242180135149	9.87845589764972	11.0236785620088	7.60322589790477	8.06059972358846	11.2204102856288	13.5210451962581	10.3344070785901	9.47169535333443
CDC34	793.609597565354	-0.49470670833876	0.00588579945914555	0.0233300113994793	11.646150622777	12.4038109582244	15.9196768808317	12.5334756717768	9.61485990512197	8.58235320655147	14.0909152485405	11.4340701653158	9.256194145062	9.47630788442551
CDC42BPG	371.513928295133	-0.648748165390862	0.00784307506485257	0.0295929443004765	1.48708723369259	1.59877913422348	2.34766993175772	1.95956607855784	1.29113872809993	1.01134820116685	2.03703451861873	1.63085888746238	1.15359242338748	1.37855151001764
CDC42EP1	1063.57985048777	-0.828059013812924	0.00101846249791633	0.00538221078307971	10.3894632436275	9.8787239367255	16.9130933711776	12.5786567691943	7.42435082621823	6.25396867677915	12.9889501266344	8.56314065239266	5.8407234107246	7.85554959825275
CDC42EP4	1568.95507824288	-0.760804304044884	9.87632057271415e-08	1.53178602262897e-06	11.7505279722581	11.9963486367345	14.50928451426	12.3357719397744	7.58448599647482	6.99858938118898	13.3935874406166	11.4601889766826	9.18018725092917	9.86811675181447
CDC42SE2	928.290050917057	-1.51861593336332	3.39660242484446e-32	7.57528330675121e-30	6.3437982815967	7.11718263467672	7.06233481938222	7.48040905066944	2.36102179801156	2.40862321869964	5.59954376997106	6.30039686173924	2.785265900678	2.47848665030525
CDCA4	1498.40024722988	-0.757852148138543	0.00276278595273626	0.0123966573689428	12.4200335777451	12.0587253312589	19.4563521582559	17.2117294135528	10.09216586786	7.54836080096192	13.739183662795	11.7743623713652	9.323762265851	10.0088442355507
CDH1	44.4756420980312	-2.85051430470198	2.11108554092639e-07	3.04379837525221e-06	0.372232131458093	0.338685272050407	0.199214674758267	0.18831470327467	0.0347447873303462	0.0396670303974759	0.211236143872303	0.257064758105636	0.0661755755901856	0.0466323912224996
CDH13	1156.62559654741	-0.385410849194082	0.00796530602116717	0.0299425489197662	5.71731759059855	5.8632472106232	6.56402747704352	6.88097168257651	4.31080846731968	5.03585259388547	4.61621817237678	5.79480199010819	7.58066830671095	6.7207756943533
CDH24	1468.80024810142	-0.619796361470326	3.20363656670969e-06	3.52534629768551e-05	10.5767844689664	10.5972131363905	9.77878248189278	9.3963785358345	6.73562857904095	6.1021940018173	9.71894559284686	8.96719933168169	7.08541263897654	7.60826778116148
CDH4	1196.62000378893	-1.27433823654683	0.00450028310071764	0.0187138276968478	1.37873047242546	1.48643070355518	4.12991424243093	3.58527334580311	1.0917368170695	1.03475799307543	2.33789236019007	1.94946020542641	1.15495354747788	1.35969177565317
CDK15	8.64006046290812	-2.89846287991183	0.00560333770557992	0.0224150665563733	0.0372248895993839	0.0366412386901917	0.0735008093250058	0.0720336180959043	0.0101260797726183	0.00449579925040417	0.0230861325690466	0.0449516335654697	0	0.0158557270913838
CDK16	2682.92098417971	-0.539247353744149	0.00133671202949506	0.0067793693862042	17.8717573485252	17.8237830203835	14.7533322013181	14.3484468607799	10.4463160920555	11.3571011458699	19.0187487972875	19.7320413371076	14.5026097859855	14.2664455566349
CDK2	1224.06839251073	-0.721879391141121	7.33984886459579e-11	1.95348636171168e-09	13.12426656748	13.846687020736	12.9218845957334	12.9432087844232	7.88208592595383	7.76628316664668	14.6547779688462	17.0272724521496	9.72893842155385	8.21700833686162
CDK2AP1	1424.69980738991	-1.27426844206004	5.43278015686141e-35	1.45030535732941e-32	17.1655154128501	18.033498385068	17.4595545484244	18.240475725875	7.28756489520702	7.03032901557079	19.2641533642634	20.8932993184594	11.1048298007971	10.0727551176355
CDK2AP2	391.641328339578	-0.707882628980791	0.00235581491086793	0.0108971128680971	4.35483872703038	4.66963699762311	6.77869117247875	5.87881726416642	3.48895688120908	2.98999736192761	5.75509516350361	4.44233954621655	4.02281665409321	4.10792441324137
CDON	313.690737298227	-0.455299900913073	0.00212760906914096	0.0100391923377597	0.883003185179431	0.904987386143547	0.931191199576511	0.949273977456306	0.615433833316917	0.689736259074451	0.874104715298344	1.1670808795443	1.11277612109453	0.988614482580988
CDR2L	647.22137246404	-2.75780724526565	1.41280175546365e-17	8.0818682238682e-16	3.89539873017262	3.99467729752803	7.61882067589099	6.6396523634779	0.802968318091574	0.792230325311102	3.63003133577329	2.65054959858732	0.972182046930187	0.952835102028937
CDS1	82.3834436091087	-0.977883381968717	0.0116407184142752	0.0406778694448858	0.557830310123089	0.618686265623017	0.305702047837209	0.388535670751167	0.197693967953895	0.265690045431994	0.613136580720133	0.664131164396315	0.436318770690413	0.351387090756583
CDS2	1937.10245426538	-0.43954696629275	0.000988919214796544	0.00524496316842273	4.60446370341961	4.45536991754191	5.19472515240981	5.41461581429098	3.40179583871276	3.67653857292882	3.12479087397605	3.50014539088649	3.17485761758925	3.07326837605924
CDYL	878.519693675104	-0.409314531419962	0.0015815723102002	0.00782085953786624	4.95386556134823	5.06949078567382	4.99565526014386	5.01894758091104	3.37481073252104	3.98865478035445	5.16963015786659	5.5245147084989	4.52194584865552	4.3821707894451
CEBPZOS	575.153680270918	-0.939261860553385	0.000215937490237514	0.00143137796858343	4.59630470236287	4.24127625175	2.7921201828265	3.25223296892795	1.92873052396297	1.87031606512723	3.75976713003016	4.53016357628439	2.39797684306008	2.17316887153338
CELF2	369.315576503137	-2.4492768420634	2.7898616814294e-17	1.53129510794718e-15	1.18287093188415	1.10596633653685	0.689645405146082	0.832168650451557	0.164901739054119	0.176463158545422	0.578391257510667	0.639744889239973	0.486212189081565	0.50979570425748
CEP250	1840.83565698598	-0.626332283766173	0.00236608619544	0.0109360106708965	4.53381186533729	4.47898036616482	6.51401286055918	6.12366915612713	3.58404556401572	3.25747863698773	4.92526061142458	4.736893087035	4.34992617042804	4.16379745219631
CEPT1	742.514323962636	-0.481810105277148	0.00145569000629819	0.00726978521002487	6.214807018387	6.46557617025364	5.38932271948661	5.78308332153013	3.96485014751659	4.37721534522653	6.44868225726817	7.63303542675413	5.04083968730955	4.41193535963242
CERCAM	959.921615925198	-2.08875876664272	1.87939057378674e-13	7.07542361528817e-12	8.19610274972439	7.20432630822517	12.8303995724813	11.4525557349802	2.65092510355024	1.90154376329274	10.6241579110667	9.60859310333961	4.05091941873188	4.89454663260516
CERK	1409.49949945302	-1.79435430241974	4.32586923191307e-18	2.655661672372e-16	7.41956115048777	7.6134052488476	10.6625741459367	10.2442986753858	2.66197665502381	2.39280292675628	9.5511459453982	9.69819864393546	3.27267624389483	3.17170782989387
CES2	804.675463194831	-0.646441344613509	0.0148284808878271	0.0492391641090512	3.60951146428797	3.62627831783745	6.14813269331572	5.44443099493979	2.80370983477272	3.0582056669714	4.34469242102092	4.65239068776444	3.69185081236895	3.61930203040866
CFAP58	2857.88902082243	-1.12769417410759	0.00208110504011374	0.0098699837689809	28.9117020849368	31.907965155977	13.7995736917536	15.9196880959295	9.66070189571551	10.651463054058	21.3187705428533	25.0978992989042	14.9473494612888	15.1652236568734
CFL2	2431.94572137194	-0.876848169760805	1.43974449152622e-06	1.73034503384723e-05	18.6184088329431	20.4666015691741	14.7190138419753	16.5416266376854	9.05291126817906	9.67458000611354	17.7868424519907	21.5794097012915	13.7473861525063	13.0804845291023
CGB5	26.2101613316471	-5.1935002611905	0.000370382245169717	0.0022682533116598	1.68141019229435	1.70917102682463	0.141174615985609	0.239561803514782	0	0.0489326877504217	0.649118211187137	0.774657971544631	0.16071546926892	0.0862875875461783
CGB7	12.7216971934581	-1.96224286713667	0.00619433543690089	0.0243883790084373	0.546964761348765	0.341834205364925	0.329407437299755	0.435566915481421	0.137766465997355	0.0733990316256326	0.251271565620827	0.265014569212637	0.0918374110108115	0.143812645910297
CGB8	38.8006237880982	-8.18874699607439	2.04464533928797e-06	2.38257977730918e-05	2.77353545526719	2.14786468008326	0.280120996769642	0.410523045481926	0	0	1.91121250964508	1.75956252006933	0.0455563256423417	0.114142167667248
CGNL1	261.578965860307	-1.56117735340087	1.22322086050384e-11	3.65907102567354e-10	1.06636501392487	1.13742898147043	0.860500225519771	0.877424891467139	0.290738114915797	0.360844401288026	1.0695903678968	1.17820054793917	0.858934444990067	0.838067753139609
CHCHD3	548.153742618676	-1.38624446746523	2.19997874026427e-25	2.61901523139974e-23	5.29541253480773	5.56125332733609	5.63923843278594	5.79321922154714	2.18612136990041	1.98147180026399	5.85266280417236	6.2080019378712	1.8896586627739	1.88435993653657
CHCHD7	392.099819321001	-0.758307482981712	9.77470110988844e-06	9.55188346395587e-05	4.016158661699	4.6823487636013	4.63514376059216	5.31043845814136	2.56989460906092	2.80386161368386	3.55569965799308	4.40812475902973	3.16891446738827	2.61050027215117
CHD3	4605.70326647916	-1.1012024991831	1.06765661337456e-12	3.67403161543873e-11	17.4847137341087	16.6448622933216	15.4121192201719	13.9780090719935	6.86527767325693	7.61095061233282	19.3110767760443	20.4095426867185	9.82312465433107	9.09386140956602
CHI3L2	64.6029169087164	-2.28874376537218	0.000248938100574949	0.00161919503226679	1.84798816763948	1.66496527918277	0.655484871242929	0.511541032955214	0.270915061626083	0.200469111826681	1.8529523274832	2.27166191400719	0.551822556539203	0.659877764474809
CHIC1	766.686305922451	-0.684951296963437	4.80435344291105e-05	0.00038720863255347	2.8122117691436	2.80907711657604	2.29031115002681	3.03435714110684	1.74594494096821	1.58146824262207	1.84372388423534	1.93245930924728	1.8901297112896	1.7823119586847
CHMP7	602.845646862234	-0.848474043511464	2.56904933098527e-10	6.2866778003652e-09	4.13925057352178	4.36537613183704	4.84405659775894	4.56789788935837	2.38843674383453	2.4680092643162	3.62481271542525	3.7709129420744	2.8787030153257	2.63424629624021
CHORDC1	1438.54443082271	-1.08339957181463	0.000170485066897854	0.00116335259243737	13.4229299808101	14.2673354508694	8.01546972558169	8.69898180138782	5.17324478936639	5.08992496694694	13.7709292435102	14.2285690878958	6.63921519789744	6.80645194119184
CHPT1	355.316866020333	-0.660737473785784	0.00442876932536382	0.0184600157898238	6.71214408500032	6.11098630480075	4.66437808017121	4.76983297361914	3.63626102977064	3.25635014589277	5.04467355100908	5.68979294049575	3.66177500954403	3.4727954826073
CHRM4	34.0833267586784	-1.80445140194888	0.00387769619397481	0.0165306385777019	0.353204175371061	0.248333049577161	0.76349801490658	0.769972995336448	0.106755742500977	0.189590600860192	0.983697525288655	0.849087786207711	0.266869306624703	0.236812017921634
CHRNA3	16.1818409297968	-4.42849319445261	0.000264872077802773	0.00170539128995609	0.190555832885375	0.218594400430266	0.0931898074579176	0.0700827779621302	0.0136410115417915	0	0.43021273213655	0.484440783448741	0.0340999669576009	0.0355991922365855
CHRNA4	398.737611577023	-1.19113940447058	0.000180380158427335	0.00122235308128124	1.44569116219167	1.37769914251981	2.65399516768746	2.12028921692997	0.937581448506166	0.686073774545834	2.0419000958494	1.62823129526991	1.13933630201383	1.18716232155668
CHRNA7	69.454732552872	-0.793542229716572	0.00462093111842936	0.0190893752346089	0.251925839747532	0.26294938874225	0.283555852620669	0.217783457740711	0.14836388645869	0.138015273142215	0.22550012299305	0.203857360932798	0.147175338158352	0.154875157134166
CHRNB4	35.6356805290419	-1.78936594160149	0.000644672310525732	0.00363820673899836	0.320419927974827	0.256003285608264	0.642821236187198	0.430584940957941	0.118857343213404	0.114336182161933	0.436577502358627	0.512974404961615	0.165067242012896	0.155092069118948
CHST1	162.250428588267	-2.97125141892153	7.52378791512782e-19	4.94632907748646e-17	1.07233474926582	0.928909871093181	1.61861116399068	1.40088932816766	0.153850875733087	0.158472359313548	1.51528233480986	0.937950822078618	0.194863136053397	0.436840037120415
CHST11	301.605525522377	-2.10468002429175	5.70561872700229e-13	2.03496551317922e-11	1.10027945006512	1.26469173760186	1.80563835008871	1.91051368961164	0.311073240837301	0.377005659436328	1.09256082971053	1.11966040123978	0.553444592013836	0.557298935746699
CHST4	45.2835751545949	-3.34164980110989	1.31366950709758e-09	2.87522273857792e-08	0.687734272645816	0.543299560614677	0.619283534362535	0.573203795145902	0.0105101421827197	0.10265895479499	1.02236776302305	1.16641402874423	0.0700623508361631	0.16457103823285
CHST6	513.983925182295	-1.36798542703876	5.65392298422391e-13	2.02061803365195e-11	1.84354738358042	1.69667599777352	2.32167482730534	2.24356500953277	0.757165297507612	0.775531574048804	2.36320572924241	2.66551271759102	1.12685903880804	1.14699201339524
CIC	3932.04104779685	-0.749102148508168	0.0137800331080554	0.0465740271112272	9.08890345863172	8.6507214790215	16.5938050745488	12.8456178011382	8.10266510358333	5.58539563273592	12.7177461802744	8.31319261545198	8.36145797057638	11.6745359628913
CISD1	744.454714973588	-0.390143121710861	0.000710915290146349	0.0039587915603946	7.8479391156767	8.31234410199529	8.30974684605997	8.63695306789536	6.03871985681005	6.29161085762538	7.30769550110414	7.47193317604918	6.31621814437735	5.84747130278149
CISD2	341.870566494503	-0.751385985361189	0.000295356109386498	0.00186853834516363	1.45557406579846	1.34892307373677	1.40591480866108	1.58108350376077	1.00840095294618	0.676136612270298	1.35438970978555	1.4617102233579	1.01175487601454	1.06984304776317
CIZ1	2959.41454104056	-0.765125698449574	5.58035881174545e-11	1.51262064467912e-09	20.7559381696923	22.3814925707097	21.3412572795225	19.6334449088635	12.3233239487708	11.8606826317623	18.5365752853007	18.0465337208707	13.3986553653806	12.9648858089092
CKAP2	1482.47073867843	-0.754578680018998	0.0137559221310147	0.0465103803543174	10.3169896119653	11.2211194411583	5.61086134654791	6.98800396102309	4.91104801424467	4.99803563945117	10.821622417643	12.4850260725733	7.49775487350695	7.2275414370086
CKAP4	2206.85990583953	-0.369880588233697	0.00126072581721092	0.00644594549432361	16.3707756805191	16.5467571872297	18.2026594234585	16.7346071440761	13.5130933604362	12.1409799172061	20.9696439425111	20.5452766366185	16.3643618605497	15.6734941629773
CKB	310.155939868376	-0.983181254116752	5.58025031432413e-06	5.78343707576922e-05	5.7344738176056	5.15799212484798	6.36221771904054	4.70579564654551	3.07659542721116	2.3627306019408	5.81359909483944	4.44179742257415	2.25877198823573	2.96857708595083
CLCN5	994.503975879182	-0.635705675174713	0.000536190204053165	0.00310658836080655	1.95339113694073	2.07248240009623	2.37982090303306	2.77055298722513	1.35693230993632	1.5228412079439	1.61873844067493	1.79529462178891	1.65518102877085	1.57360684486647
CLDN4	253.221064607759	-3.14278573125162	9.78230831137582e-22	8.30912228488582e-20	5.33544281636888	4.69594195099895	3.92400152351772	2.94120663190185	0.503212520256859	0.435076000315055	1.5900600074604	1.45004820796764	0.286897865091121	0.414708230697089
CLEC2B	472.439369539704	-0.553148268586903	0.00391606530088858	0.0166619547298614	5.11717113986741	5.16609103299298	5.41515717058311	6.71431315837308	3.29557936717519	4.15183531197396	5.02707522190703	6.28496845050517	5.03618697476364	5.41492011608075
CLGN	149.998861471504	-0.738572750045729	0.0043296065581527	0.0181238626628872	1.09918424361135	1.23473777463494	1.22531429041136	1.74535459966829	0.76469664187901	0.78583607684235	0.803142991459909	1.18240158885472	1.23860094368231	1.10320912780514
CLIC3	11.9093352655473	-3.38955930451934	0.000491256377169022	0.0028890007040524	0.438548576362729	0.585841319567604	0.407490486485728	0.377169875152424	0.0298239827989354	0.0529652708737652	0.203984296813956	0.1103287070239	0.0248514519340449	0.0622657458307806
CLIP3	763.258942526378	-1.16770063150384	2.99725356728793e-06	3.32448641715014e-05	4.85967547773548	4.06281448052248	7.13966883711125	6.25449118768471	2.40597664983253	2.43908138169412	4.40348570622167	3.7728221175501	2.77891702887731	2.8045844331437
CLMP	340.506526616791	-1.93953732769304	3.70158356559377e-05	0.000309090999252117	1.80381485249216	1.81540376633736	4.30228248783669	5.35061896175147	0.754894963597012	0.92533285668141	1.68988276845051	2.38585548917085	0.793127150252423	0.753763201305815
CLOCK	3681.39119138387	-0.601201110297371	0.00396212154670753	0.0168213541039614	8.83887964329195	9.5203190426866	6.46572709382167	7.39581565698349	4.79743287767978	5.58948811304124	8.4461385264523	9.90391872579661	6.50558396082888	6.45250020041059
CLPB	779.348340600917	-0.511340545985943	1.10858427324125e-05	0.000107025459234178	5.45036002854401	5.29226463421274	5.44884482751475	5.89908545142254	3.75676361920167	3.81333506312867	6.70156570638635	6.25918047287454	3.70390977583521	3.82434480265774
CLTB	714.636656173673	-0.845793875898015	0.000934428820514566	0.00500416455581949	8.87818883624648	8.02965388644416	13.2295608822885	10.8785733525898	6.47681712695657	4.66674393871028	10.6784490290624	7.95955124248759	5.22542914715732	5.94458158307193
CLTC	35374.5710784708	-0.638855307407055	0.000137200813862547	0.00096155176588871	84.9455390503928	92.0886301701038	107.103971152264	120.194353012554	63.7021100769136	62.9388219728517	110.827722561863	122.312897184914	81.0498573843802	74.9102604677903
CLYBL	35.1373549582923	-0.947553795564467	0.013072916880703	0.0446292816355563	0.34539054346066	0.323785855070335	0.302631286477196	0.254056025481346	0.164832753334701	0.146365619375837	0.388323606964433	0.280494424560151	0.350243287403571	0.412960310214205
CMBL	297.618032847377	-1.08511465698812	0.00975733544630659	0.0353007172953749	1.13208275381523	1.16450562012135	2.70139912575379	2.74190826261544	0.880724983514595	0.893774222513262	2.62261204146868	2.99212434875418	1.77729331118526	1.92006050996421
CMC2	532.027222952432	-0.448402081803296	0.00213276561940103	0.0100581363619451	15.5803092649239	17.9939028285245	18.0110446147851	17.4847299880378	13.2195416577845	11.5025331753046	18.4013395864239	19.0944533029328	12.8144639528236	13.4183108743043
CMSS1	1432.73094756675	-0.506551374018658	3.20540596452249e-06	3.52534629768551e-05	27.5021610906901	25.7818603132817	25.8381788826215	26.4679830950281	17.7325274170575	18.5801069330393	19.8876576084393	25.0516999541373	17.7000879296896	15.4126415035011
CMTM3	1057.02066105528	-0.760580921090794	3.28694863280067e-05	0.000278907828825299	11.2183007300168	11.4858049376181	8.89663026365318	9.06180602428169	5.73703097554457	5.99863839197077	11.7873315047818	12.2430682029498	6.27537946837653	5.97905924546056
CMTM4	1549.78444197425	-0.749586568591319	4.16800428478685e-11	1.15103554065297e-09	4.91302182707863	4.91041867014294	4.51508319697724	4.70564666162336	2.81391868062504	2.7214700699828	5.09642422324039	5.53632088752321	2.75795088185234	2.64429589464334
CMTM6	1939.62706416416	-1.10961361923638	2.40403661194601e-17	1.33197236056216e-15	15.5867082318994	14.7234471461102	14.0436448058887	16.2099216781125	7.34034137784599	6.37724048198307	14.2660936820888	16.0314494558393	10.2881910112765	9.73038242132939
CNBP	2774.98904796765	-0.341593202752447	0.00987097563081291	0.0356240720277126	19.2282945172515	20.84542157775	17.5055411335032	18.5079899263902	14.1368586834071	15.1997884325453	17.0543892410732	20.1712762218493	16.7592419608796	15.228501266227
CNDP2	1866.60855726553	-0.956450425341856	1.18789847360929e-06	1.46054314072032e-05	7.35401102644436	7.74875152314082	10.2004162010446	10.5626803025411	4.34158170168225	4.66952959907881	6.69152362629019	7.63771904907153	5.710791419927	5.4234543566693
CNIH4	714.438956421861	-0.466389467661013	0.000131560832669586	0.000927559147981368	7.36789294436882	7.23760076791169	6.93672804472501	7.03359907962592	4.91877308227593	5.18324025800763	6.92547864504317	7.85983380485342	6.2840598830546	5.62467237338051
CNKSR2	203.927059781707	-1.10621760586714	4.7709506503027e-06	5.02146830989745e-05	0.561344002748772	0.730232592956006	0.792724158010469	0.893247507071346	0.339705465330695	0.33449893915117	0.585335990936204	0.637050718143163	0.605370199921454	0.53016574805272
CNN1	381.446752741616	-2.08609856586273	2.64468100498616e-11	7.53990851567171e-10	7.25973727035933	7.10781046864664	4.55783875509096	4.15843130629433	1.423297996719	1.24126943769414	7.33972847166358	6.5909606295715	2.03313010539658	2.20211229712539
CNNM2	500.018606614683	-0.429465038547793	0.00242584586870839	0.0111507900758605	2.70275173268342	2.44400245815471	2.8567445399354	2.54989755082818	1.91394342564483	1.91616553641634	2.90078563531259	2.96049026127451	1.96982210736964	2.25263600642319
CNNM3	895.934285706309	-0.537664673987635	0.000536766055576144	0.00310880023561976	4.01796492861932	3.86522051035089	4.89420651350166	4.78733758691867	3.00373492503264	2.90371108025895	3.87947758962994	3.57621212507007	2.88103448455804	3.21793959522634
CNOT9	1930.34041628624	-0.727692723299156	5.95666358904406e-10	1.37190138268454e-08	12.771857691798	13.014745199249	11.7267388809889	12.2202599615627	7.12071940165903	7.55070183296554	12.6999170949431	13.9916532701185	8.15919932557433	7.62348673934855
CNPY3	789.621390905616	-0.629804344644928	0.00376870761164138	0.0161288580253806	4.57351559876118	3.92762033799319	6.33253296919107	5.22996663652504	3.08825601183591	3.2393312357737	4.74167803554599	4.58840350023787	3.36999225981567	3.33540883152992
CNPY4	298.157637533388	-0.446493382406685	0.00533195524747596	0.0215072617915016	4.9094123041408	4.28904449449015	4.99644585001557	5.05578284718313	3.32217212073785	3.5810588663158	4.3334496320429	4.50014776853968	4.04910957340101	2.7433218017408
CNTN1	171.193408679486	-2.72326726233624	6.03184249885764e-06	6.19318374052289e-05	0.287847010979625	0.322438029873502	1.04548032527931	1.18272986738004	0.099535706139304	0.10900713691528	0.874934834861064	0.974543070819405	0.193527111325465	0.180100346930903
CNTNAP1	587.304085417831	-2.48734043682568	1.7986163062061e-51	1.44044639541115e-48	3.18035765294426	3.30009357532353	3.40158175077415	2.91304341934366	0.529039395645141	0.584249473103678	2.95284785708182	2.82873580406933	1.11875276632899	1.1926904290089
CNTROB	1007.60867829264	-0.337112512033229	0.0124968705239933	0.0431307270836902	5.15546853722739	5.27234876645821	6.25263486526391	5.87521567327135	4.33356281464328	4.38293365243526	5.1688649927436	5.24423798544343	4.31276988031958	4.29176339922558
COA3	442.708713200649	-1.10329328461958	2.29299009218089e-14	9.41729427369115e-13	13.4364390769174	13.6818294573041	15.0423184062555	15.4173437905553	6.39181841251094	6.68827479598586	11.4710030740927	11.4119754328123	7.62659687973447	8.61451987878513
COA6	188.235986137063	-1.07128380847858	3.57346183916563e-06	3.89127466899007e-05	3.283185668377	3.3201138337168	4.26769241427762	4.58096238695978	1.7482089478285	1.83919412579171	2.67156549654328	3.1773630048836	2.24843316612676	2.22165742647631
COBLL1	667.773228449904	-0.561542190394867	0.000621464436995625	0.00352303150431979	1.42119128102006	1.62341182204253	1.64006935099312	1.94025668099276	1.09569443845176	1.09427910386843	1.5520698817116	1.7830991217567	1.71836368998608	1.62100533355187
COG4	1352.98589844628	-0.490910836862445	1.36035813920883e-05	0.000127966631365298	10.8718165704318	11.4501941834852	11.8716079154825	11.592685998575	8.39447886646958	7.52266380355881	10.6628658947482	11.1438171250663	9.22149141886022	7.79421733384284
COL16A1	492.652290039074	-1.0003106621266	0.000388394220107466	0.00236458803181529	2.92434306237406	2.55436997538093	1.83918028848492	1.79499746759643	1.27660960182076	0.956220431111393	3.88726951685134	3.28975546353443	2.15646871986705	2.38877337633809
COL17A1	604.272537048413	-1.78413458578901	0.00155090955457158	0.00769081774331458	1.24566557123437	1.32712103259324	4.97894266574084	4.70412268719935	0.821196189474429	0.905734455615649	1.49449101120884	1.48056404881389	1.15607093860669	1.40767201643961
COL18A1	42.4815438222254	-0.941773816650654	0.013942626426805	0.0470153368447613	0.152076184511017	0.154853559718189	0.170541870759691	0.163489743831238	0.110553587068917	0.0538338732715332	0.338773743911985	0.25593858404506	0.0891494208959194	0.148910284925503
COL1A1	14986.4138841935	-0.7181463049061	0.00221848093919903	0.0103570258791064	64.7119785761858	53.0582207629862	73.2294590927255	60.0589969763261	46.0556061850661	28.5267579952399	105.457747653861	75.4019778385509	53.2052688430039	64.6334357465857
COL3A1	86.0986698331326	-1.07614100799436	0.0013385680184163	0.00678682875294294	0.506559552303572	0.474873504477807	0.31680715281288	0.338615591124719	0.211994736747842	0.168635055052455	0.627644942904726	0.682940725369037	1.08197518108912	1.10649292591092
COL5A1	4733.40097314082	-1.46400795944408	6.61882426878181e-08	1.06402431379258e-06	12.4566893271352	11.4319729548464	20.0971944317518	17.1105920028047	6.26121708276084	4.53990437266959	18.4439078366217	15.6284892821559	10.8406572494309	12.5632888396258
COL5A2	698.723260143922	-2.03162178030745	4.76818010261049e-21	3.80138304198616e-19	3.46507481969094	3.14342777208593	2.5037953057342	2.49725031542682	0.699766176494501	0.689717884482135	3.37687712527461	4.34119103853081	2.07290156281546	1.79332086709729
COL5A3	425.120468942751	-1.28358735318838	5.39128542520018e-13	1.93067190867077e-11	1.91147939010268	1.79056012334008	1.92501139257777	1.76315004076963	0.85221523637366	0.634682480572363	1.84444887494913	1.72885834441874	1.44970425609227	1.68494194275466
COL6A2	5987.3881312566	-0.949284811510078	0.010021358218567	0.036063380402968	24.465935234932	22.2042651499593	53.1087937372918	42.4921507588541	21.125291384792	14.7618491548877	38.0456708793151	23.8187278554645	21.9864091998477	31.2627892038182
COL7A1	1035.59299205309	-0.569408134708951	0.0109308389005926	0.0386494984125108	2.72392043629971	2.38676255071027	3.23828609816702	2.58765416295168	2.1710877162999	1.43238449037116	3.08683925744683	2.60805800707393	2.00081156325877	2.89852513515355
COL8A1	658.325818033113	-1.16875733223812	0.0132412748277499	0.0451078927281758	2.74527719944128	3.14665887738057	8.17238583641488	8.61833469778186	2.53372632126096	2.36827243204888	4.24449240147163	4.89838043066993	2.28776468710207	2.75956507739616
COL9A2	102.171274123043	-1.06393180190419	0.00547679335115892	0.0219907980980103	0.654895076450396	0.752655085402579	1.28724387871489	1.08314768102763	0.556710833984366	0.327024532758029	1.94614901525233	1.32438876095938	1.04197020193121	1.60931989489163
COLGALT1	2577.27895944666	-0.956385530255088	7.39928547655463e-10	1.68652019160952e-08	16.0188119138607	16.2227548698409	20.6441693643051	18.7410097165597	9.46459709427525	8.55523430936156	18.0239504835039	18.3072378969442	10.7915770802022	10.4671708572337
COMMD7	981.823301018599	-0.670415175859878	0.000657202430513832	0.0036923627625074	10.4667156378339	11.3467729427778	14.1721289014544	14.7121785769204	7.0672538956843	8.461181235086	10.2594885889627	11.9126945107731	6.66073530408083	6.60921078724539
COPRS	923.131241219065	-0.378219109930257	0.00706307816838393	0.0272128524488862	16.9313848152405	15.2126216539595	18.5260724135502	18.1868291025576	12.3554767399733	13.5122895647656	14.3415817570718	16.4516466717696	12.518889185158	11.383906286794
COPS6	1471.73519873457	-0.446497018885235	2.93074224282395e-05	0.000252625966616023	24.0070261672485	25.0678417267612	24.2945828042791	24.4504341776771	16.7941672570754	18.2517208372661	20.4050144376436	24.0577436304187	17.7088307351234	14.5649410931748
COPS7A	2089.23238437103	-0.556775347232569	1.98104118466739e-07	2.88607541743041e-06	20.2554932879525	21.4245762263425	22.8345603018922	23.106021760263	14.5271002860968	14.5528573130885	12.4869068416401	12.8494699588739	12.7711773212171	12.6060986901882
COQ10A	149.051028217734	-1.30909860949257	8.47282751873678e-11	2.23812215970949e-09	2.15306699122083	2.20819215210805	2.2024804355428	2.3358934857951	0.83285743876074	0.918470615503761	2.09276964164346	2.0374442056663	1.58947408309017	1.45836380650531
COQ9	793.433292598947	-0.876732689126809	2.43801948732959e-11	7.0303543939869e-10	12.0852069718004	12.1109288626626	11.8790624179247	11.721366158947	5.8715105318849	6.83261401957339	9.20783586036614	10.3239450708986	5.81365067215865	5.36491840942333
CORO1A	25.9164801841245	-1.73115960312821	0.00831669169589731	0.0310448709724607	0.249006202786815	0.19452541433079	0.664122007947478	0.406499076838326	0.0878056317168863	0.133659902391219	0.238315849442068	0.167051246620565	0.125427193517094	0.222600846644392
CORO2A	582.804124498842	-1.11065369801771	0.00463011621521872	0.0191093974223328	1.67776242385771	1.59748183950709	3.71759004970845	3.69055794544738	1.22939646128426	1.17764725164238	1.77898581389938	2.07772385089625	1.89447550409523	1.84591609405959
COTL1	3600.3445796518	-1.10027132969067	1.26314227167527e-13	4.83810949666232e-12	44.9225039093953	46.290508592313	57.3694736564987	55.050219391104	23.0201981159326	23.3265124834788	46.8598479481252	45.949317491802	25.2715993011882	24.9432120669907
COX14	254.208006314729	-0.687734606500288	0.00135380174626357	0.00684830116779153	5.5854363202426	5.2193304095759	7.21276516507058	7.15567989677787	3.61640420852316	4.00865982531983	4.9986021829542	5.87207148969187	4.34825779860999	3.85112703042269
COX6A1	1385.42021928275	-0.930441145005625	4.16007934827962e-13	1.51126676365647e-11	59.9323781238561	58.8568381801403	67.2208363808402	62.4200895032222	34.038914521808	29.6607368825633	55.859601895707	55.198300806419	40.6557154128631	42.568543189448
CPA4	9692.37076569006	-2.21723505658327	8.49196875319101e-23	8.00106938301992e-21	115.796393047247	119.448221334155	83.0208977074053	83.0957151048504	19.8227213808221	22.4169727354186	126.062150607243	148.565628981792	36.7147516976059	35.5809945664326
CPD	2970.9631022378	-0.992110737159721	0.010398981916785	0.0370954849346457	11.0644334144834	11.7389806174842	4.88857481419036	5.54884246890016	3.97092986614096	4.22517391144714	10.6281031965931	12.1512093497102	7.42518633246405	7.2183702689224
CPM	13.8622002689911	-3.21025819590603	0.000592752942146334	0.00338337983834045	0.0768633644432356	0.0819941299418296	0.0400197642698824	0.0541382606813066	0	0.0128042715493224	0.0739693279704487	0.0906840951398945	0.0210272989825527	0.0112894851383641
CPNE1	1937.7166430471	-0.417041739292433	6.34551667817705e-05	0.000491868272559619	17.4678848513628	17.7885444712517	16.8808567803393	17.2200411557262	12.2939422093208	13.0769864732332	14.8617278214148	15.1779592240227	14.2911717278778	13.1605789169633
CPNE2	583.052982265456	-1.34122378321854	4.05559533411519e-17	2.1986318212854e-15	6.49195920364304	6.54138497248817	8.04909785512233	7.09907900317262	2.81688716891821	2.61673997764543	8.54637693255468	7.90361728928372	4.21598552602805	4.39945888722189
CPOX	1670.01883812772	-0.68849728759338	0.00215313918709495	0.0101298155774168	12.7269905067428	12.0388564365139	17.5871574022973	18.6838751740875	9.76499288850059	8.70275709049582	13.9304683900726	14.0456141393078	12.9101228723283	12.6695278044917
CRABP2	109.043744106356	-0.837348584398289	0.000305439520908735	0.00192610555436328	2.61891489397232	2.1966665430667	2.29469392993791	2.35445621323806	1.39565478268111	1.20229799799146	2.94445374146743	3.09779123726746	1.19767345287295	1.26120231052604
CREB1	1263.57563035159	-0.635357101397199	0.00102264666685572	0.00540108262090255	3.37767583185741	3.20776723610083	2.36962235876953	2.81188033298127	1.87455785857507	1.83058475396512	2.81583007460453	3.22305416805262	2.38149455040509	2.30385038087051
CREB3L1	437.28126604832	-3.89293336955992	1.7797577491385e-70	2.2398251272908e-67	5.1902224012529	5.41132376758498	4.92044762431517	4.67454914017035	0.313151819388821	0.34957078776685	4.88202417041401	4.54774930352517	0.752998993601561	0.73784908809475
CREB5	5799.32417417636	-0.52721771668375	1.85461616874056e-05	0.00016800247957347	14.7076733299933	15.1544968936268	15.3602107151308	17.1357400957756	9.8408139307234	11.2779340931037	15.4413269436562	16.1964490919998	12.7970667869828	11.7074813549909
CREBL2	1824.00431064786	-2.13442465829538	2.07816212356522e-13	7.7739147463048e-12	9.88362895777927	10.4991721053338	16.6492004501466	18.7477687303464	3.04596489626043	3.13949455317681	8.82426902187244	9.8659905473629	4.04296559461705	4.12225201872852
CRISPLD1	130.870192062576	-0.705684856688496	0.00169950357681433	0.00829002035434433	0.722716201181551	0.743074645780192	0.591202039044648	0.76860282208753	0.438642662443191	0.408270114883641	0.843413711979238	1.04399140202202	0.731016183547261	0.75028323725128
CRISPLD2	53.7269120191931	-2.72934524758781	1.85796129722718e-06	2.18527503977608e-05	0.50501415380014	0.464320450375834	0.221088452142786	0.212990228446352	0.0422695977607922	0.0609925852979761	0.220845931866929	0.320556704399884	0.0704440372102978	0.0992805539864505
CROT	313.06769938233	-0.825886826803297	0.00194111560408573	0.00929361843162677	1.44390433688122	1.59617142978401	2.43981697887792	2.2489236885213	1.1179955415799	1.00849803882792	2.31961845403564	2.582160082857	1.72024308792635	1.64253057597865
CRYZ	820.234384527715	-0.517362010417802	0.000343328211255021	0.00212996470214867	7.54725342527846	8.12010852286749	9.0266751133019	9.51173743525473	5.79061828421361	5.87107263534369	7.97711755728358	8.48287390921053	7.39564318109644	6.253570825897
CSDC2	1042.4834083442	-3.16769962820765	1.56946280930202e-15	7.0903500607929e-14	18.0665719561769	16.0315288197232	9.04335945878832	7.15844756747727	1.51423315670136	1.23395473457585	13.3793004650858	9.86315092373987	3.16240128350273	4.9221441243733
CSDE1	17626.2061660282	-1.66986614040379	1.03458318249326e-14	4.36084236659061e-13	128.066718411645	136.713603778548	91.2909543964938	100.352678332072	33.5116529261769	36.6710388718811	129.934528754136	145.241728820841	75.5187569300172	70.7804963433899
CSF1	419.958693411716	-1.00576011667329	5.43905980209912e-05	0.000431475887677552	1.75912407327269	1.77999527215456	2.78462023148557	2.55012686874738	1.09518033762943	1.06009208375685	2.20444148719635	1.97461673230694	1.2702150967477	1.48312825959331
CSF1R	27.1744924578513	-3.36651716514813	1.58017468415855e-07	2.35343176332962e-06	0.226050964964294	0.168282378573484	0.216219700266374	0.223956335458871	0.0180857021498268	0.02141261323738	0.100791842997249	0.0535239614980194	0.0100468574949669	0.0314657206367632
CSF2	24.8128511807254	-3.71626532618886	2.50350846376762e-06	2.82933390783333e-05	0.703996163698717	0.734471795815933	1.26607553699196	1.24511102973288	0.123551072690621	0.027427238993867	0.234733522023703	0.13711679818155	0.0257378731495268	0.0644866896311141
CSPG4	1156.02338634129	-2.48720061995384	6.8356728029707e-16	3.23757309450378e-14	3.06650198687101	3.03898443129011	5.71464854865431	4.79701560717175	0.82187917278229	0.623316263744817	4.61664773601853	3.37149090631246	0.835953080202151	1.4014186715582
CSRNP1	1903.34261390638	-0.382310057707689	0.00895921068527528	0.033023500640976	11.7789955871372	10.8239583338113	13.7960693543333	13.1156592843992	9.71492829630472	8.83589194644181	11.970366073236	11.6439427541632	8.03341309653339	7.96112283134213
CSRP1	1927.23647171175	-1.74670063308782	8.94338951774206e-21	6.97228229703971e-19	24.7997804651573	27.3222216410869	21.097627063644	20.0885560537697	6.57295428131958	7.02238813189357	24.2780518452114	27.0403982403562	9.33706689915428	8.75648220606312
CSRP2	299.833822852466	-0.853876003899962	8.86425935626699e-05	0.000656491742740934	9.19355560506282	9.3698866692661	6.99907955308937	7.32960490927133	4.72853915795905	4.17544798182363	7.02725534188403	8.5324133993021	7.39873226734988	5.59420285889849
CSRP3	96.2185081575313	-3.67249477167107	5.84731596862366e-09	1.14251331114243e-07	3.1903510265273	2.85951473249257	0.990022352540249	1.09962795055965	0.182182976892677	0.132358909488846	1.15795457380818	1.801297008898	0.358818299850985	0.466801703118669
CT45A1	9.3329940691584	-2.23305249587806	0.00851693595235944	0.031658205600131	0.208299898295754	0.219679236164411	0.302418846317761	0.335899705025595	0.0472188861062015	0.0628930358622752	0.305016441227489	0.262017250663381	0.31476892576247	0.0739367838759853
CTAGE11P	33.1169576174509	-2.32711466051517	0.0116679751699361	0.0407569497460556	0.671309609465709	0.562572332399737	0.0708826523777119	0.167665925624648	0.0368914385934339	0.106464425231043	0.231296001826703	0.232005030015569	0.0768513899672063	0.0962762483081487
CTBP2	2800.90885434246	-0.401621837378647	0.000908660442216464	0.0048884544523395	9.76383369138353	9.86315273328073	11.1644969678919	11.4123141029841	8.058973799295	7.53925855710201	9.97995706839688	9.92321545281342	7.52840011249121	7.69841521811171
CTC1	974.407320620247	-0.354455122969865	0.00423766520552428	0.0178024375908756	3.26693884606502	3.28235597270657	3.19718983261527	3.07311182336835	2.31771819266138	2.57865300775271	3.05372645548992	3.07192749432782	2.17412603951217	2.28343246379743
CTNNA1	9023.48099744883	-0.886754032020991	1.04885951764089e-26	1.39998907888749e-24	40.4318312395566	42.1948529303613	42.4512458466572	43.5225169120604	22.2778098723847	22.2526667564118	39.3156703634206	43.0316542560766	26.7488454831197	25.668303219603
CTNND2	91.9567332393825	-1.38032320406561	0.00271064732152709	0.0122114280639186	0.262926079249951	0.25794383529509	0.607213062754088	0.591612068360977	0.1704892503236	0.151388387415127	0.328651084514065	0.369187743345968	0.246012752527675	0.243083079761943
CTPS2	54.9834870218325	-1.30213887045136	0.00175800209691742	0.0085258020769579	0.23166050279498	0.223956352482739	0.399397559945751	0.350222332041914	0.0886181044222579	0.14863614390788	0.318022218416885	0.342397581652	0.201016708770873	0.220989665837387
CTSA	2174.72544192175	-1.00166867265649	2.42481904574892e-07	3.45374994074779e-06	14.9123627984527	16.6687809224707	21.60033842781	19.5666603012654	8.03799134471765	9.67860475930302	15.9011712471561	17.615484822816	12.1251444102052	12.129050035729
CTSC	2169.62930583544	-0.800149253445533	7.77433646689752e-08	1.23179886879737e-06	6.20059405872995	6.67141278053482	7.81169904608071	7.91535530921991	3.89778645936331	4.11498345475467	8.0228838851539	8.71727059731168	6.44821491946051	6.23249630900371
CTSD	2146.98472916282	-0.914594518357406	2.350930549083e-06	2.68407703522916e-05	24.309544948834	22.5645998774567	31.0535390188726	25.601404607364	15.2471073248886	11.5815812250739	26.3509662599251	22.6883736416398	19.499984990793	25.0248906748778
CTSF	123.66364000671	-0.609315972925285	0.00928105384553557	0.0340105839651604	1.34543393427509	1.30691329757196	1.7580235198208	1.57963294472508	1.01129068187929	0.908680497450731	1.50962559285601	1.45190168084411	1.52484757904744	1.40756448668509
CTSL	786.94202914242	-0.882941764352485	1.71977088729304e-13	6.51626736843357e-12	11.6385137602177	11.1883891020842	12.3460523758088	11.5839453181477	6.32343256297777	6.06719649983642	10.7183790749265	11.9107885374878	7.79171313255088	7.20640637803011
CTSV	154.116731868058	-1.72642311640184	8.67083702976173e-08	1.35504893194588e-06	1.10930497254101	1.15892081602686	0.716802461533711	0.806237796228538	0.228443605317262	0.33022059218076	1.50997841215905	1.63514685999734	1.32806072013882	1.17016354481262
CUEDC1	2275.18071649173	-0.380979835749695	0.00747774690974353	0.0284496702230126	12.8487269376769	12.543262916198	14.6353941441645	12.8512259912824	10.8553814221101	8.9865944807731	10.5020069347842	9.70735831697483	9.64783375697181	10.5457366622897
CUL1	572.751121479891	-0.36505296259168	0.00853150180768417	0.0317056592173776	3.9164957116071	4.56986207857753	3.98110364057061	4.1805736979831	3.12058861963719	3.18695286377007	4.03099414090377	4.76857243411016	3.48804725895846	3.77811819907189
CUL4A	3744.82330157953	-0.971191290969798	5.71254455421707e-11	1.54607254225423e-09	18.7830091775704	20.0475796987049	23.1383122274946	24.0862495104849	10.2026889513519	11.2107466194558	18.680797778747	19.2288206208209	11.6936366997344	10.5941342466576
CUTC	230.015895004383	-0.69610710669144	0.0141634722107164	0.0475779250487345	5.05619580124871	4.92927589510143	3.37525665704386	3.23618576677863	2.28643994444733	2.72277499383194	3.00374829662714	3.61936226778932	2.64368219708023	2.5163007986176
CUX1	2827.45024531896	-0.766147512251535	2.66686823795683e-08	4.61567303384689e-07	3.99383349618105	4.29081938326803	5.03061181592569	4.84933215147135	2.63516040535801	2.57751292427063	3.97565878702819	4.16289103454582	2.93464923822833	2.93268187454054
CXADR	1533.8871136776	-1.29826686390687	4.12753760753542e-15	1.80007636403878e-13	7.14351484571993	7.20461717969648	5.67566657361716	6.7072645004171	2.82991839377287	2.48494608825614	9.00868369918039	10.5647615042404	4.88975782470597	4.97686402173732
CXCL12	37.2230124945028	-3.34597368771592	0.00319382851483959	0.0140224432103062	0.441462561704723	0.336449293497173	0.0352269363139895	0.0470972165700138	0.00458353459650935	0.0366301405466295	0.268213000731998	0.189907197481442	0.0611092035459464	0.066985701233076
CXorf57	226.484281372554	-0.770065125353569	0.00767829004952192	0.0290682837091807	1.81740416301221	1.66305609816372	1.02361239664429	1.29108103123745	0.813612612713887	0.849303002553426	0.977024171650656	1.12581063056125	0.978124884689944	0.92712004924958
CXorf67	335.524029338113	-1.87341922788645	7.84933239884349e-11	2.08279198095216e-09	4.31074093996484	3.62395215810692	6.83726602641347	5.13257738159595	1.3869780456104	1.26517588921007	5.6630835434252	3.47034558892151	2.15385711731024	2.67193874835314
CYB561	798.058316031947	-0.896945469124825	3.65787935197969e-10	8.74466435583856e-09	5.77339818001323	5.33389598289233	6.64497166684903	6.12806395391857	3.1339044621485	3.12985632316883	6.41582028044739	6.31981717761653	3.0081327826988	3.21951498980426
CYB5R3	2505.76269645862	-0.696807110627044	0.00113056972215491	0.00587179767810209	14.973260422091	14.4904527240561	22.1185607234851	19.0123658223048	11.4236878054423	9.8254944809064	14.9738896407688	13.5986828927273	10.4956295085828	12.1769279075687
CYB5R4	523.553843133102	-0.893431307382905	1.72970716156182e-10	4.34746226527213e-09	5.58531719578016	6.22512491478983	5.62101571436546	6.34566913449035	3.06458346079741	3.18116912620454	5.5435554426835	6.25924657119518	3.24598450488591	3.36804480568913
CYFIP1	4286.19389375932	-0.710598726307559	3.41727720632617e-15	1.50147149870974e-13	10.8394574495094	11.2394791042348	11.3829943235636	11.0092648429101	6.7689362671807	6.50619911878371	11.6764023685236	11.7581564070009	7.92778738975824	7.64865984769835
CYP27C1	53.5177674790362	-1.99764034735055	1.95009498945628e-08	3.44621099490773e-07	0.342461038766925	0.353143554741993	0.331466547671655	0.286349220850113	0.0776314771041658	0.0827207869761665	0.409042577118786	0.566710409560033	0.198376648757612	0.162077005422918
CYP2S1	22.0365132923064	-1.36796387379331	0.0065298237554714	0.025504093271481	0.258165390970849	0.210172453501809	0.252507443226293	0.189896551566595	0.0646830358646117	0.106667291894974	0.280893010348486	0.143570275534988	0.0615982634828614	0.0868137313726794
CYR61	10882.8237253968	-0.745326818922588	0.00120295215689729	0.00620047890994857	130.176747400961	147.619305205607	96.7556104849185	97.7888565590213	65.4338442739325	72.4502539119894	107.01560643436	111.423294822343	86.4385086975723	83.748256360999
CYTH4	32.313504862335	-2.93097141677654	3.52984314719097e-05	0.000296153840049322	0.176723664229442	0.155315004502857	0.397691400669912	0.492778926684681	0.0450685836719971	0.0333494154432862	0.15983404008925	0.233412889097776	0.0438133869134603	0.039205430111853
CYYR1	95.4837038047158	-1.40279889208995	1.38670931353065e-07	2.0918177564295e-06	0.856915641271195	0.724461365149689	0.683877428071447	0.796890930004936	0.314616193654826	0.253970894841469	1.37479360488108	1.50244858874446	0.571986470229531	0.552349130149133
DAAM1	1172.90402933871	-0.888377184944186	0.00101386980177723	0.0053611560736834	3.87464993627045	3.78598014604307	5.84550896160012	6.7268113575531	2.60635741408968	2.71763857448849	4.43718052148737	5.06760640461226	3.21167483258194	3.23328492067511
DAAM2	295.146184182917	-1.17364079297529	3.0573004520769e-05	0.000262252077240228	1.39339409701985	1.58331544145026	0.935070986663987	1.01680424419348	0.524526295298945	0.54395408457756	1.01836467986756	1.20672741933503	0.928380080990392	0.799337618197136
DAB2	2151.73734499904	-0.342766112621843	0.014586384596507	0.048683489645405	10.7054987992453	11.6812546538092	9.97703502149115	11.0549363447638	7.66773236526899	9.05015430734598	8.86686620173822	10.3051424549432	9.63005375272248	9.36854525829201
DACT3	28.5834126956617	-2.1537938414738	9.68939688718444e-05	0.000709622178566647	0.203069032710315	0.216325869233355	0.407393783099653	0.324156806965117	0.0669572606573268	0.059455664784772	0.419797852124544	0.315813543619743	0.209225720632156	0.139791650287676
DAGLB	2512.10281461705	-1.43964048173832	3.1999852643553e-27	4.56638012380777e-25	22.7952802818035	22.0441948380694	26.7536408575707	22.7871846092411	8.43225456760167	8.56036174569921	22.3968449109039	21.5335020731845	9.52584334690837	10.307067158437
DAPK3	724.973080784253	-0.950486418206124	0.000141372216697378	0.000988427415075831	7.18482106265538	6.21812697378102	10.8547593624491	8.05591380823734	4.39803041926794	3.76548682879436	8.27999635283869	6.16619979354824	3.46358235812203	5.1498623678354
DAW1	44.3655431751555	-1.68654755965892	2.21012261902442e-05	0.000196568149543621	0.606360531603569	0.659380870817301	0.413173176943522	0.573644590729273	0.175941210090046	0.16599387953431	0.685251556129966	0.878666829163405	0.339027902779141	0.309930926696477
DAXX	1491.73459010272	-1.23787924291271	2.6729095994294e-14	1.08762111391101e-12	2.71105606410041	2.69097406410067	3.49552623601038	3.29843945079455	1.26249235786979	1.26097355144905	2.43311462757033	2.66917695122102	1.77341207469153	1.62366775332198
DBI	1035.73961974616	-0.618341685308716	0.00166520305146545	0.00815884665288371	20.6574703223518	17.9629590089396	15.6157214506645	16.108696202916	9.91151053977627	12.489421110226	18.6062278163983	17.1399180568121	14.2527057227503	12.5497564653977
DBN1	3091.00332374942	-0.918115487804837	1.16083159613818e-07	1.77849494716162e-06	21.5794862820832	21.5148002274916	29.0353100428787	23.3551085163627	13.0374605433347	11.6352369232366	26.3951333005393	20.2008136138811	14.3549960419553	17.3727064077694
DCAF4	1050.49181483348	-0.708887224872742	0.00179624497899926	0.0086897419783053	7.89830277111235	9.35015779475671	11.68590611227	11.9040182286641	5.2384687689139	6.93522696210674	9.59191912598227	10.7145194853008	6.34199326761158	5.70612555452144
DCBLD1	864.99185222408	-1.15063321587681	2.70037344326847e-12	8.76204045984293e-11	11.9987732609754	11.8735912068657	9.49134575617021	11.6159755835232	4.79923830735837	5.09902217405182	13.8811765941196	15.1747765904796	6.47609749136801	6.04423803786458
DCBLD2	16110.7894849487	-1.18397317753272	1.2793955678651e-10	3.2669087695964e-09	58.507551548336	61.3427736986721	76.6308080206366	84.5924850645205	29.7703994837048	30.5481959076078	59.4380489718575	67.058733338138	41.7746421895823	40.3613861002696
DCC	49.2205748365724	-2.61701997904188	0.000169536060985603	0.00115957137364338	0.0663492640457892	0.076111958230127	0.214965200442991	0.22337202443298	0.0118740930536408	0.0337400706917697	0.108285493509465	0.105422807612651	0.0316618694180271	0.0347065974067554
DCHS1	1275.85267428314	-1.52471749235173	5.23442230437227e-40	1.92136013709864e-37	3.26748241181093	3.12911157533602	3.44676532457477	3.23483026439516	1.14484842382113	1.07661918805464	3.46301215264023	3.37312973535648	1.84033328505725	1.89144573351526
DCHS2	2382.78947572875	-1.31217865917746	5.41046972842347e-07	7.14595698239079e-06	6.16300603332304	6.75850720326833	4.12043369887502	4.287777292551	1.95630675912181	2.2480516064257	5.98058406366352	6.74260343031283	4.10981972705002	3.9157273700112
DCTN5	1458.61214062154	-0.605316812749349	7.95116727785587e-05	0.00059842638303521	3.98678188344097	4.10560933018529	4.92061499018614	5.10853647230197	2.87800674356573	2.93396706481133	2.99678356450651	3.56184399657315	2.75067783004619	2.64328082753109
DCTPP1	345.263239049321	-1.22979619310734	8.28302181768058e-09	1.57771417735907e-07	5.49129391671524	6.15150427045798	7.82754466231191	7.72529441548036	2.73380648222312	2.9193739132455	5.79819476158696	6.27946771333157	2.78422335223639	3.15222058950323
DCXR	712.418274439953	-0.642444767363744	0.00126537649705482	0.00646597114315804	18.945219147499	18.1129519835102	25.4261897837854	21.8466493916978	14.6241845690799	11.7650944781834	19.0044959763883	16.3813775101318	13.7457007939946	15.5713185728688
DDAH1	1813.02494956534	-1.06295853869596	0.00279926866993511	0.0125337521462736	12.7330211174044	14.266471479485	6.14013023824524	7.62458474426312	4.66085080644183	4.90130092249148	9.9415983875149	11.4610985918469	5.98708512732254	5.81114909245479
DDHD2	1109.13655827223	-0.433123518378314	0.000189613510577722	0.00127511467285072	4.58928119775187	4.71538931513073	4.40316402555393	4.40356344220118	3.19016068288757	3.36133048011714	3.15074154263368	3.62883020083694	3.30100237710023	2.84880320155916
DDR1	1979.84403238279	-0.54778883690769	0.00775899920555992	0.0293423067187723	1.69011006367336	1.59152808132241	2.38745700275822	2.10925851974133	1.39148221010774	1.20493783184672	1.92532182938923	1.72557831200772	2.02066956556834	2.21228267730005
DDX3X	12095.400890444	-0.39259275984653	0.000384340378601714	0.00234720732429241	42.5461533149717	43.9226683624432	38.780766184075	43.0059301768299	30.5731145057852	32.0431399250431	41.8002816717699	46.9359638761973	34.9271113030373	33.0493327299655
DDX47	3977.69755760388	-0.474454428404662	0.00206853788652585	0.00981566631368136	55.0213615411364	57.6270637824334	46.1745366627084	49.4048426048756	34.8023720553186	38.4513437369577	33.4254334366124	39.4825820586586	27.1650715035062	25.7985798347568
DDX56	2308.03029265034	-0.365452452603501	0.00385123124817106	0.0164456721671173	17.0448958849693	17.7883918659956	20.7849145624496	19.3784812648169	14.166537211026	14.2511341719926	18.4394133601134	18.0393889752454	13.6195647972579	13.0256601515856
DDX6	6378.82963587835	-0.623147287894093	2.20773917996948e-08	3.86277622759506e-07	24.9098471083827	25.3732568870398	22.6582280289477	25.6907291060409	15.2655707600968	16.0149254193801	21.7561947777308	25.2685069585587	22.0072661752617	20.0926290882318
DDX60	283.783240117887	-0.585319490250096	0.00115999994044159	0.00600412425106942	1.05382724631369	1.04432141558877	1.10466289340296	1.33804320356025	0.762581511768003	0.716143139676845	1.15602297767922	1.47107607204329	0.92820357119111	0.950257509482695
DDX60L	1333.54734154716	-1.1049105527785	1.52219985228375e-13	5.79257866034284e-12	4.36221466039662	4.96282794756897	4.59582450598007	5.51593294436919	2.07407958901771	2.33422420645572	6.09024958347482	6.92905884724416	3.34729729027344	3.36170284231851
DEDD	885.097736201884	-0.774964553355531	8.52522655950364e-08	1.33754200135258e-06	7.95760015103897	8.15424056169279	9.70959567008268	9.29806952462596	4.82635128682779	5.18876256810566	6.76686490398999	7.74512762502415	6.14841835963953	5.08824734687291
DENND1A	607.263839741213	-0.389443073263713	0.000963382820189473	0.00513590259462364	2.64928560589754	2.59419208621153	2.71416074440106	2.65157349555052	1.94861328448543	2.00730772050956	2.28141900092551	2.18096586628383	2.22272906007894	2.42585627440409
DENND3	648.819839193522	-0.963779908840655	2.35638014273789e-06	2.68718846180575e-05	2.44986142248767	2.86002750547836	3.69756627868978	3.29215926931943	1.62150852060528	1.45566430287494	3.13824013060883	2.95310402256646	1.54788978249712	1.58571739058468
DENND4A	2016.8807561254	-0.565151918844071	3.09243896509273e-06	3.41177347179264e-05	5.31158651392312	5.71876982246809	5.17113070390802	5.8880642439075	3.46815424823306	3.82026026171449	5.31507934702001	5.95816217966764	3.94847866237951	4.25908059143099
DENND5A	2736.24002727755	-0.811897497555668	1.14749580812046e-05	0.000110419053212858	11.9253509399959	12.0139877788344	15.4020387863049	16.2666613260541	7.17739429779212	8.2679097135771	14.1297668690096	14.966397921531	10.3136778334131	9.61268514556593
DENND5B	2619.89048273457	-1.11506899679166	9.58420968051491e-18	5.62880634536641e-16	7.1169380553431	7.52753381093146	6.44428756580106	7.09616670284424	3.01163640176579	3.34388385535724	8.78722081777876	10.4343933422816	5.68463614298557	5.36311992876199
DEPDC7	155.431563997356	-0.581775123182151	0.00530479623831812	0.0214124180808538	1.89912455521229	1.6603526479513	1.79339932118202	1.62444872786309	1.25782889195917	1.02715581697504	1.5789335681284	2.04405009239148	1.66574942806085	1.72335376331228
DFNA5	2243.92932117533	-0.988409317315289	0.000145536270378664	0.00101432102365573	17.1039076005057	17.4321223864334	28.0624009154962	28.1344969868842	11.2818055119082	11.0003124880433	15.4728665850183	17.6176011953717	10.9058716476489	10.8983511509182
DGCR2	1320.91799633293	-0.785080628498327	1.18022548102936e-05	0.000113074457587038	6.8458535975679	6.86407954673113	8.54129473919465	7.26578363999418	4.7608557546085	3.60916698697011	7.28530915103663	6.56155669481469	4.623764219547	5.78682621851693
DGKA	884.249384107983	-0.741345926731457	3.18370139755129e-09	6.56065905537499e-08	6.68731311783964	7.01571347835706	7.39437672206568	7.76635057941211	4.05570045366223	4.36950481777906	9.66867761394883	10.2410464474888	7.52615850103658	7.7714376720259
DGKD	4334.69217659169	-0.399402713249828	0.00312321630476373	0.0137638689528845	14.4048399379475	15.0242465500082	18.1064849566119	16.112094785712	12.0722792214284	11.4871339453749	14.6185557300638	13.7749831807671	10.5964034808629	11.2726453279545
DGKI	906.360606420551	-0.921276563846053	0.00240430662991883	0.0110668528356347	2.40553411411754	2.46692555024852	3.94180721213508	4.52700087661797	1.50739918904769	1.92141933335419	2.64745182972314	2.71108972768958	1.59469001041836	1.67144862320267
DGKK	55.1986739908556	-1.81657150581878	2.14416605432916e-06	2.48539879679115e-05	0.257455656676813	0.219923027701374	0.15370610999468	0.212110329471854	0.0621799247260298	0.0552135604796228	0.460104949870323	0.61016882656846	0.125441301043246	0.150315174777884
DGKZ	1454.3671430512	-0.627590811048222	0.00468811130955394	0.0193216533887707	5.78448484553882	6.05309072501944	8.28835536758654	6.12670142764976	4.82164841555915	3.47917638194476	6.89679649891317	4.97380372374387	4.07364394976199	5.093954808543
DHCR24	9571.8884363643	-0.349938256245727	9.56975502678017e-05	0.000703125578885904	51.4179583330587	52.9606408856329	51.7350399393026	51.5164076209762	38.7520418587053	40.8253428541713	60.6667035110133	61.5323895357977	37.721477330815	35.1259871082368
DHRS7	1269.92205877845	-0.568401084078147	7.79660329925515e-06	7.80502008690775e-05	12.6695028810904	13.0857287001332	14.2316189699779	15.2906293995419	8.98638403540697	9.20796237416741	11.0344263752566	11.709801257103	9.01293836901252	9.02828139716467
DHX32	1662.91190201621	-0.457183504098922	0.000169866502745798	0.00116093014425067	12.7866622747157	13.4811096712973	11.9849738053017	13.147026923834	8.68781362120127	9.59399459633024	11.392068940351	12.5868307750924	9.58878297244479	9.00314007908529
DHX36	1876.08235588226	-0.397915556500896	0.0010898691445009	0.00570650949686814	9.30055550192646	9.77051603279259	8.4221058229692	9.43170952038058	6.99889483309742	6.69352360568387	8.32617086332408	9.36298427356208	7.38321153677017	7.37508174319591
DIABLO	1055.8839891685	-0.707805045555493	3.52288141190895e-10	8.45635525836836e-09	7.60337235121197	7.27495839890124	7.84457429167125	7.49331058525012	4.68413940871861	4.35830153327753	7.77928447071739	8.59933100925875	5.57177015690774	4.86047706535986
DIAPH1	5926.64261125422	-0.97641277888913	2.6003882871697e-07	3.68297759096808e-06	21.6468530495949	22.7725661279562	29.8305370324273	30.6383269776701	12.4907005009	13.5011675310149	23.3178407418613	24.7676750122795	15.549961357083	14.9968801822514
DICER1	3074.09525366266	-0.62060666860108	0.000894897545036416	0.00483063720771955	7.46231015096022	8.22567808715138	5.84906431129823	6.46405374233687	4.31428189111358	4.59068277461387	8.4822137110028	9.27786973505951	5.38867497355634	4.9336651998024
DIP2A	2685.88742710789	-0.74043137981338	0.00408707505926586	0.0172727693617667	6.43771276327252	6.39425196444612	10.6430707378559	9.95383025096185	5.14850021413965	4.6038799450565	7.19153310801142	6.84716865984673	6.40241220736556	6.78114706697277
DIRAS1	259.705229949573	-0.9218356496845	0.000228619863220839	0.00150356602093616	1.60012798319282	1.58610534763203	2.46176179493839	2.19398567550913	0.998989323771284	1.02012701596229	2.29925560536696	2.41269206217581	0.790807135425646	1.01303693128572
DISC1	43.395686329695	-1.32106705924087	0.00184787442879524	0.00891503273848392	0.0614770209866307	0.0732922878284493	0.097792447088015	0.119251096434377	0.0381726410020409	0.0306677614209105	0.0897914233545201	0.0874176553366521	0.0605869418168634	0.0664132167934201
DKC1	1586.13040115445	-0.403818420996986	0.000413207333789408	0.00249496230775722	7.88676238291377	8.19152555210104	8.00665763710558	8.87697507607283	5.81110710785747	6.35010621313012	7.22315475613973	7.75802781840384	5.53907710009935	5.19874924981588
DKK3	1644.87356207674	-1.58096417501271	9.25974578455786e-50	6.2749023453125e-47	14.7108024644197	15.2953519770805	15.542865812734	14.6202229955063	4.90215979008002	4.92102742376603	22.7536678947409	23.9863196660611	9.02260158044213	8.88223328619587
DLGAP1-AS1	415.773596382806	-0.51414677266989	0.00591040087000846	0.0234196256545178	10.7536483160703	10.4764897448196	9.19554296268804	9.70792243044795	5.90911311154012	7.80557677710655	9.33390783873809	10.4782272930614	9.50188882905415	8.89581869324682
DLST	1609.86949557651	-0.822362714503868	1.14360241339415e-08	2.10324957427887e-07	12.4329074811227	11.9153089531296	10.3876435519941	10.7863273057581	6.15351730343766	6.43013389788211	11.4145593064507	11.6862975746849	6.45334224651967	5.69249652146109
DLX4	41.5121806437536	-1.37247783903113	0.000389529509646818	0.00237068063228576	0.477028043593865	0.530135625641475	0.554056038568181	0.380486593411479	0.209295623785364	0.157970006203347	0.445355443597841	0.325186364267423	0.296479859456569	0.273101269747651
DMRT1	23.7077219544546	-1.96042468271593	0.0121807249570589	0.0422049543792371	0.417005839278244	0.529999352747537	0.149028234598694	0.120696905054681	0.065443719340174	0.0871675409319253	0.124335907414714	0.169468467388129	0.054532335822884	0.0569298823216651
DNAAF3	78.825190374025	-1.98728362868366	2.34415800578492e-11	6.78189160983982e-10	0.905950002153102	0.905432334523923	1.07832662021208	0.917599180199416	0.2240368569264	0.244149655806388	0.95963717067565	0.715769650314232	0.296996247284019	0.308282127142443
DNAJA1	5633.08411177589	-0.362652513975419	0.000222840693969021	0.00147104915213196	51.7721738915896	53.5669033131502	55.6252018381586	58.9307997863403	42.515804013007	40.9879364215671	54.4467302885214	59.4652519162664	45.1783168339666	40.8960063313602
DNAJB1	2824.0275517393	-0.566525300421985	6.53882564411179e-06	6.66324864219813e-05	22.8054323147415	21.9332731190383	25.0926969406586	25.1560696209062	14.6374118621045	16.6694070295601	25.0637350021599	27.4793208165335	17.1795609843635	15.9303850408283
DNAJB2	2132.3303669662	-0.985250981434874	0.00255810991126063	0.0116493508727064	23.229293596761	22.1639829411332	13.3907323220313	11.4805682221996	9.09355663174604	8.30900525692281	22.1118977746328	21.8775153348193	13.0212224226145	13.1131361844044
DNAJB5	1383.31550599756	-1.82980323695149	1.90374640432663e-28	3.04928253616644e-26	13.8309843225116	14.1315869219112	12.316686247113	12.2081143898868	3.21236922520965	3.99777930701003	14.3578147421434	14.9025255246771	5.56985141118766	4.80985700446992
DNAJC1	674.49363251098	-0.367421375943312	0.00243893156525881	0.0112021729010154	7.45136187272724	7.21704482042574	7.51580978073556	7.91894397845132	5.47323570699773	5.92059780050535	10.5131093755527	10.8614733939747	8.64791306935858	8.50963704121915
DNAJC22	178.944285800114	-1.29605331035677	0.000254831344738972	0.00164887016634445	0.727302795386692	0.823852459288389	1.38444130816955	1.44214902569189	0.379201260895711	0.487995979378639	0.968940821191223	1.09783565180491	0.609057716721746	0.608107144628854
DNAJC3	1215.83582505756	-0.513463815451212	4.59038024537808e-06	4.85170423175263e-05	5.03148013142384	5.03508965465083	5.12918446203007	5.66275942631257	3.53447002015035	3.6005916187665	6.77607789671571	7.63653830687983	4.58940666006452	4.09702705072297
DNAJC5	1496.97746702807	-0.9011167781248	2.6189686309603e-06	2.94847337436994e-05	6.24096548513235	6.27998453234183	8.82521385552966	7.56749169614047	4.02206243295659	3.53483893600061	7.55444583584502	6.58197762213704	4.19505936788098	4.70546934995823
DNASE1L1	404.738807379507	-1.37174617676822	1.41344038889722e-08	2.56736146515258e-07	2.35607727481433	2.57758175144926	3.58813976905934	3.54186247477846	1.22996329390564	1.04493493885463	2.41510993882517	2.30207336239548	1.24649077187693	1.33252452168927
DNASE2	302.319080586149	-1.04265664329053	4.23082901168816e-08	7.03235626008809e-07	3.54231715738487	3.75767946202944	4.47521657845485	3.92270522886754	1.65429533273318	2.05868200256754	4.05605030560579	4.04709653198458	2.6261474801996	2.4958083091046
DNM1	1721.15840109215	-1.32712840953446	2.32959093655189e-05	0.00020615300206483	14.3975497619884	14.7447010009068	8.48598938106529	7.92528200164031	4.3364070989652	4.56030982223118	17.0802851198886	15.1150328622743	6.33214995279465	6.50054386473349
DNMT3B	829.382507765224	-1.55843270929663	2.68327300951813e-33	6.30354495395998e-31	4.75129968517599	4.91069815252103	5.25466353236574	4.91334532651483	1.55012566146829	1.73452110444907	6.81345734164352	6.99367239969019	2.39134303919297	2.50923559119167
DNPH1	205.164450885588	-0.604988412198208	0.00709754733479149	0.0273038616794086	6.84449421144084	5.94456974448916	6.39094121049033	5.86731041983506	4.80678781236442	3.26872810016619	6.98221782511408	5.15449628295826	3.21949468461992	5.24004923116064
DOCK10	888.711303200652	-0.756356865635883	1.32673521926869e-05	0.000125271960494614	2.71716098922653	3.09989258477334	2.57940479194273	3.21419915199441	1.489678701608	1.86315206378338	3.23729745197239	3.58319950071473	2.23963233963098	2.26641210339156
DOCK2	208.639511036003	-2.2991918859481	8.80925791568056e-07	1.11662097277968e-05	1.50580692291449	1.31979288080865	0.560345367697515	0.616094649682102	0.186912285834036	0.211878457702334	2.02792130101944	1.97725256620008	0.540149181375709	0.369473722410841
DOCK5	2511.4966980205	-0.389314619631076	5.58843646925137e-05	0.000440943404172592	5.37137360855611	5.51412466648583	5.60473081741435	5.61430085592264	3.9694132845944	4.27089021064261	5.01032717021712	5.72370658850444	4.13876458638185	3.95819082911181
DOCK6	980.104189685727	-0.808184602385144	0.000276904934266626	0.00177152797271013	3.3230641496203	3.12172966503573	4.79140764379493	4.20730417422836	2.36028397869968	1.94446267948238	3.77457004981037	3.15341855192921	2.09934581732527	2.38081835304497
DOCK7	2854.60168887807	-0.630789165363067	2.18067182606095e-07	3.13387087303163e-06	9.04277788140047	9.0298139553387	7.90634333486799	8.93788974353724	5.39628387942627	5.62083507002594	9.15108547562323	10.0912197401383	7.32839115470369	7.15531746223556
DOCK8	258.611090164021	-0.908069682188138	0.0142336591482849	0.0477863644309511	0.605714177938968	0.561145557641023	1.15598277606515	1.21297115703687	0.426461097674956	0.490565679725747	0.871610449699606	1.04935610493749	0.923391210509772	1.06235484200758
DOK6	53.0503769033148	-1.54344027029196	0.000183237860306535	0.00123700174941424	0.218428839880485	0.185979940868507	0.123358514867521	0.129259965925242	0.057237506556455	0.0532451008795056	0.178134668073518	0.193591162900211	0.140811857709922	0.153641567753087
DPF2	1225.22204677125	-0.324257583243879	0.00945432018456719	0.0344734410868976	7.05304969751217	7.43184715783003	7.36414490447606	7.58736760872362	5.27489629725282	6.1986485759854	5.9556318642735	6.57127746425327	6.08959281422157	5.46040039985888
DPF3	29.2886166664526	-3.09761379671119	5.38613019289255e-06	5.59871550847043e-05	0.292889995910616	0.155700880290442	0.12445768590196	0.142076325065869	0.0194324969068599	0.0215692071831152	0.236285556931894	0.283954392547547	0.0445294599571556	0.02535666768204
DPYD	400.182743716027	-0.625094218621321	0.00141809390667424	0.00710764280155435	1.52050085868241	1.48639446136244	2.01673234659405	1.951985065676	1.08368436643503	1.12329097307414	1.51258085145206	1.69619778519725	1.62972157787348	1.17180674445427
DPYSL3	2918.94450512555	-1.69443182893322	2.38459210378438e-51	1.82670122941639e-48	15.350411654373	14.4733497267674	13.7166851971664	14.5856495470929	4.42810644163607	4.34891544284615	20.4397894393331	21.9167849102623	8.97327696854616	8.20618615498089
DRG2	529.695165433719	-0.51530753181409	0.00606041210747564	0.0239252522790978	5.76677103676897	5.32236599506597	7.47558590807457	6.90014769062106	4.40742312450626	4.29098261334695	5.44400754758528	5.81212954535291	4.52242914311628	4.86701745678594
DSC2	521.920454840981	-0.736132600926023	2.13103790865632e-06	2.47343589674675e-05	2.33101422634613	2.28062968126986	2.4236677506475	2.86343381437539	1.47216605766187	1.43016816348587	2.84079387093208	3.2642010012475	2.38036136875758	2.17749973495545
DSE	849.92271484606	-0.788269458240387	0.00383303425608253	0.0163759045969733	2.92444795606015	3.18569262967406	1.88785018044122	1.99025764947742	1.38846353339367	1.44260132250833	3.02496919607206	3.47968870578837	2.26651540527973	2.17409889672793
DSEL	457.97791225045	-1.28719243962232	4.07704759965365e-07	5.5140320181448e-06	0.716460603563308	0.846758795532769	0.537663192871243	0.545150877085679	0.271703199398296	0.258661530119135	0.68298071638057	0.786699196117776	0.451716174188508	0.443167942359067
DSG2	4334.09350573978	-1.48322784040486	1.68059226849517e-11	4.9432980264802e-10	22.5533263326633	24.3759026639336	16.1016196306958	17.9306030069813	6.6308180805815	7.53508363968668	30.0621089896219	32.1834120782085	9.41532973337967	8.70726884449627
DSP	40.8508975852811	-2.44194144715303	0.000109177631090158	0.000787715267066949	0.0509550826476172	0.0998005132037246	0.20079961032389	0.144773976807626	0.0247518354588959	0.0197808741824898	0.278392615237993	0.296671145105958	0.0268124740190813	0.0206704987180174
DSTN	2541.33960987948	-0.331100931528469	0.00945864448189284	0.0344820726518663	31.7741253412938	31.2271224259482	33.797817572729	38.1432883030409	26.9548849073038	25.4147299883118	32.378437558502	34.7486897659653	29.0103125251449	27.3115534831157
DSTNP2	242.512239439268	-1.11159524445752	2.08782075122896e-06	2.42807351920152e-05	4.71084515086907	5.33116995998993	6.70824298945798	6.34784579811114	2.98423360191193	2.24071855219126	5.06939436160511	5.81205637902883	2.96206817052065	2.79452048234018
DTNA	978.772155147933	-0.971376313683231	7.01945732424117e-12	2.15839124949049e-10	2.37150447196698	2.4560736137621	2.11360523233792	2.47087889818919	1.10305642132757	1.2404005269968	2.32243294112237	2.70421245747118	1.49549351686106	1.45349042780002
DTX3L	1969.49064549688	-1.14920471612201	1.0285396985896e-08	1.91263322705107e-07	10.0278804919275	10.4322559639721	7.68337196763481	7.87932770776553	3.71670848720868	4.22618226369517	8.09338146106365	9.72718105636267	5.30417979182956	5.17456203866314
DTX4	512.211884439544	-0.89344332670065	2.59113047546967e-06	2.91899794420077e-05	1.88806624018959	1.97836400371774	2.55017852040057	2.52084166322353	1.19287779782609	1.15485824045068	2.32299575186183	2.2278747049943	1.75328818834443	1.69921986544644
DTYMK	1088.54574839437	-0.699670994792032	1.19551037292071e-06	1.46887707534797e-05	21.0122650040583	19.8146543060796	19.6855545408169	18.657636932563	13.0148790818678	10.8285159598286	21.447998883115	20.2214510435868	13.7567039493548	14.3863403314736
DUSP1	1925.57000624935	-1.49229553722809	4.77676346432054e-12	1.50557773663441e-10	28.5372918964573	30.0343459423893	25.6876420825989	20.1307665720327	9.90720585911413	8.25473167267984	28.9144381308604	25.9607917466158	14.8337383437028	10.804706614478
DUSP10	638.742272016493	-2.41762452715856	7.46895192907489e-18	4.445792703999e-16	5.61895569026737	4.96229737615214	8.37904173183642	8.72851918138591	1.1955190767338	1.32893888280546	3.58032919896051	4.12777651209434	1.96286533687096	2.16317750517519
DUSP16	4244.02829996162	-0.445328544152678	1.23377836061065e-05	0.000117438902947591	15.5703816469385	16.290919956143	15.5521702540463	16.2561964007369	10.8749949749648	11.959049656418	15.2679057564071	16.1574398807763	12.5444199976713	11.9617854252334
DUSP18	420.345595474681	-0.871271472377979	8.89019289894339e-09	1.67704827287456e-07	2.72599821218892	3.08827709674755	3.27370873306887	3.25129464435526	1.65796734843672	1.63372493551033	2.70603865341607	2.72248976424043	1.87702313791284	1.65770422083329
DUSP22	212.078020913993	-0.690009926926622	0.0037695587299788	0.0161288580253806	1.13421424174018	1.4161006168042	1.64227094886921	1.79893485549474	0.920067742101593	0.890700564472726	1.55088203602394	1.6480748015383	0.979948408503381	1.06876798877929
DUSP3	6139.96076786838	-0.444237570923759	0.0054644861080781	0.0219563924146472	30.3906662770503	31.7817906026332	39.4069658304324	39.6224296856472	24.6116014791354	26.0119615232227	27.4744710744973	30.2341930138798	25.1106920072405	23.2662484964397
DUSP7	932.853210725276	-1.16983662655856	0.00456248107599789	0.0189128105573422	4.69799062296056	4.37310941351479	11.4319562217855	10.1900832723021	3.67490876202038	2.96350765899554	7.48348329160039	5.87623729664376	3.01219890615108	3.2568471026812
DVL1	1134.06494946549	-1.29397186772867	1.42653410621783e-06	1.71681041102814e-05	9.46929323415401	9.19460683542424	12.7589089418938	9.24697378288467	5.16631138110254	2.94346677898502	11.7785117355705	7.26789897663712	3.11922597051059	5.40148597376988
DYNLT1	912.962452193139	-0.6108397088622	0.00327847634899663	0.0143480474532329	22.8841407156511	25.5873824879376	31.8898584192709	35.2019313351255	18.9389630872633	17.9605782395848	33.8218470926756	38.3885592007336	25.8833988183062	19.2127733790213
DYNLT3	581.098978441008	-1.23342402953321	8.95633063184995e-12	2.73013130454263e-10	6.31506981447598	6.53845330237724	6.76482937249936	8.40628422441761	3.1402796617592	2.68158194964405	5.28849540638781	6.76777000410832	2.8719912378381	2.75268826215305
DYRK3	955.910907722437	-0.654743240500761	0.0137375798224824	0.0464572780983336	7.55341249213659	8.35964292878281	12.7292341348664	13.011140854319	6.15555924852577	6.73241066138929	9.20106611660049	10.5764192246178	7.18452068093425	7.22052700740245
DYSF	1344.15096434718	-4.4510127771996	2.28200393699038e-164	4.02066273658335e-160	5.97172644900458	5.76236592592353	5.98010345483056	5.65626550095907	0.233207318093901	0.286953436821654	5.15225244702961	5.54846069146139	0.582974496935902	0.70250442256154
E2F1	579.404865110673	-0.678488363817362	0.000401315518477854	0.00243400279520183	6.07438505881975	5.66347535308308	4.85431531411259	4.54280160739142	3.36762472437979	3.09399572324148	6.50390079605712	5.86686384219337	3.35240564045392	3.39355233193958
E2F5	145.144215914975	-0.745849792453149	0.010138897777028	0.0363823299253474	2.31108494385365	2.18450261416639	1.36997852199053	1.90721607962279	1.23908300778686	1.0307714106006	1.50663818439313	2.38356298936809	1.71719656091221	1.81084799110717
E2F7	4131.38753157864	-0.552793466646506	8.55639872486421e-07	1.08848512009662e-05	16.1967653833165	16.5619793885395	17.9501520092067	18.8177653567368	11.2006224590137	11.9334048886275	20.9814602207476	23.0359883125064	15.3370555967124	14.3286593730517
EBF1	153.644756347627	-1.8800872904735	3.08685436808712e-12	9.94283128177822e-11	0.950028193402708	0.882898353275195	0.69489601377636	0.696200262473347	0.205671640921	0.222331076188529	1.32856230098369	1.54815813252007	0.681794978295274	0.714104172795958
EBF3	75.0415080699826	-0.83607995471575	0.00713661989976015	0.0274242325002997	0.307083402496603	0.471584511178871	0.497460266664311	0.447413703753808	0.225322488358321	0.24399798968932	0.279823426809534	0.435068202752317	0.238127829094217	0.240948113909546
EBI3	81.7474864603291	-1.82899657790923	1.91079772541628e-05	0.00017238271952949	1.48950304729003	1.36693596047422	3.13224712336292	2.19124252995051	0.55445852981873	0.568083973883524	5.44532223122004	3.97602536151778	1.97244465864909	3.04978937395698
ECE1	1560.01385379836	-0.722437297333401	4.66805567747026e-10	1.09661963975131e-08	6.4229402533454	6.42753968625862	7.14608828346191	7.02859382388148	4.18836951950403	3.81294556945242	9.93114692916807	9.92188735386081	6.09261262518997	6.63548590256917
ECHS1	1779.91158786028	-0.417972697516305	0.000603842300568312	0.00344195971973895	29.4568029989483	29.3872817233212	34.1977537293458	33.1961638339219	23.5536082302897	22.5834111050404	27.2863147858524	29.2241568133308	20.9035491578408	20.2831018430595
ECI2	642.929968023287	-1.16322550679166	1.73308148544194e-16	8.799758700865e-15	10.92512882549	11.4900914717068	10.1356134553771	10.6972797704248	4.47018463096312	4.95486236801473	10.6365772300099	11.6441043643293	6.69192883029829	6.35591553953201
ECSIT	403.182675387608	-0.672472568429568	0.000560881286116898	0.00321789885382404	5.99786903410484	5.44353902257871	5.7370135314218	4.63583039236961	3.7056831491581	2.99460516788177	5.91595579090414	4.96071590122559	3.17669593227062	3.54827462806715
EDEM2	567.385493572343	-1.24462081772265	1.26650979394582e-15	5.81110314050296e-14	6.43078239322842	6.59370191028006	7.63452518575693	7.85861735907579	2.85860563734107	3.01364679090432	6.29221453035778	6.88423148033086	3.92886397128451	4.12537619118538
EDN2	43.1051646854076	-3.39475243799267	7.98813208434726e-05	0.000600294866858539	1.7215219115136	1.6805257023527	0.528794517977489	0.29060968981841	0.0580532274913036	0.13746453382401	2.54413295757613	2.11894514667897	0.386992442248272	0.60601019186462
EEF1A2	3800.91684864915	-0.712405368539803	0.00284971435468255	0.0127208303053336	56.0568981861154	54.3074119720765	41.8754720421291	35.1596038083279	29.6713410693336	26.336367368214	50.3311009801267	41.7246348547176	23.2846960473152	29.6241152580063
EEPD1	274.885341480829	-0.857516546608997	1.15074442151123e-05	0.000110610834493215	1.29318964666296	1.33709418214002	1.67429620665388	1.65193887126045	0.843235412104143	0.762543954190485	1.38779246043051	1.14441964601318	0.70264338784888	0.664232165279734
EFCAB14	2220.91197936213	-0.33835971926044	0.00595987338191411	0.0235758888899741	9.04178496883109	9.45857874066799	8.25423932410861	8.96269372747517	6.60094154402447	7.19795000389071	11.141579611026	11.8424618745036	9.73951111049286	9.64689343594705
EFEMP1	286.643530821527	-1.1624521285841	5.00159021055292e-07	6.64077000148695e-06	2.02815251113737	2.39821627379486	2.23518870558556	3.15905674964547	1.08930795868109	1.05077174341888	2.87059220194274	3.61224174394948	3.12793353985757	2.96958704651489
EFHD2	1122.05026843198	-0.958922601528825	0.00170151084810513	0.0082975144292179	9.04983693451425	8.62192820035771	16.6826104016287	13.5240016072669	6.85608856660834	5.15340699929617	10.8929357233447	8.50622016664442	5.036441068497	5.70256676135416
EFNA1	191.345565127094	-0.714828837116306	0.00134282682579753	0.00680408099981047	2.97116660485749	2.3691191414819	3.43771308402591	3.35325334166285	1.82703318380145	1.78732422689918	3.76532954868162	4.04382187740512	2.07719099489332	2.63454481856616
EFNA2	51.8014038805293	-1.75918859480024	3.36040310287833e-06	3.68431501366604e-05	0.607549473822399	0.596853374446695	0.898983082186607	0.626305368666096	0.192435698535988	0.201030649955047	0.851648723812888	0.57788137048737	0.245242759562018	0.330863080787089
EFNA3	59.8691000631456	-1.59818280638479	6.89662892898943e-06	6.99146749711535e-05	0.820322092923616	0.731497064978441	1.173550305724	1.01094543346305	0.326557549030767	0.277889337841901	0.992677790106972	0.865764594578794	0.283448799416085	0.326685516635737
EFNA4	177.613555121736	-0.877309834209481	0.00210287807920518	0.00993580286337251	2.70879628414215	2.95150403783664	4.46397804564415	4.28428746460803	2.06397620339076	1.76422387338832	3.44490584529217	3.61072417168481	1.97702493393203	1.71156498235326
EFNA5	669.731980989909	-0.891622062862935	2.35550605876936e-05	0.000208237136224071	3.55537537121091	3.6321352680012	2.76333543867365	2.83432821702962	1.4907183784621	1.8765937982636	3.07397516704517	3.48701168308967	2.00338104844203	2.22509297919767
EFR3B	1524.62782150625	-4.20897390962704	1.0610808697297e-142	9.34759192188383e-139	6.09356721857616	6.7495376510452	6.43165656748152	5.79800846303591	0.306962817476748	0.354062674090757	9.20367101534845	10.1684966889507	0.841183699391641	1.2751312858995
EGFLAM	330.580072847917	-1.21333496551359	2.5414960603703e-12	8.33866277237697e-11	1.63994022610056	1.57104670525056	1.65432400773803	1.58742071011444	0.590954267191879	0.76541950272604	1.57691287348872	1.63713486998697	0.933015588499063	0.909100427583216
EGLN1	1205.09843272159	-1.08110264654592	1.04779701648403e-17	6.07274198468161e-16	4.46868146262489	4.71545282587377	4.20122289645776	4.38819704902376	2.15239477945424	1.95372219261089	4.00103734802371	4.13792813675286	2.78423803763368	2.89951583457977
EGOT	29.1385959880137	-3.06995011291377	0.014556698703816	0.0486301376516471	1.15838916878849	1.13165359368416	0.0283250483509659	0.091761019130149	0.0829237278233052	0.0589066555682231	0.428525150671179	0.429466943688794	0.082917498313455	0.121188221451085
EHBP1	2138.22044721655	-0.337580829043889	0.00122838725797081	0.00630806036088247	8.62117269447253	9.47533761767515	8.98509161144159	9.68012564582242	7.06246501397446	7.1408902857573	7.82882181416111	8.79853960093425	8.17977459197648	7.20827246071638
EHD1	1583.36607154493	-0.846662186931117	0.00376063750524634	0.0161193145967221	7.44036237377869	7.57953782598948	14.1874694897072	11.6137908096427	5.79857271658631	5.26371120934468	7.90111604919921	5.99347886643956	4.59070480528784	5.70606519523446
EHD2	1219.82005345048	-1.16936626712645	0.000949474160248609	0.00507304471444872	6.38170773554491	5.61648351188315	13.4436259128856	10.7214601796236	3.99153734072693	3.83870381917092	8.07705343283765	5.85634873929711	4.80865193925471	6.16532517266332
EHD4	1711.13849773089	-1.21414524725543	8.36908184056481e-06	8.32137996325685e-05	11.5601283457573	12.1396634148608	19.6320391203309	19.8406526519674	6.94803956269549	6.31845656275407	12.9234475702068	12.2221401794234	8.05236006809625	9.68520754510716
EHHADH	247.477632325815	-0.799906773633053	9.2088304980524e-07	1.16058930289832e-05	1.47623530782499	1.50798242453962	1.59474371141056	1.68832884430251	0.897129123655566	0.861648838414172	1.65574870071816	1.97771913410364	1.41882212127954	1.47801609811459
EHMT1	1793.00967814189	-0.396391532145446	0.000611187245336942	0.00347595483395467	7.54053997288392	7.79681898378225	8.32062339703383	7.52033124064197	6.05835375809832	5.51528985491686	7.64387198326046	6.60384490370772	5.7260923662311	6.35707873895972
EHMT2	1639.77849183547	-0.439383584912058	0.00536416896461859	0.021587778206399	1.22368134077769	1.19654580963796	1.46299674716762	1.24081824698965	1.01639459524042	0.829979073963153	1.30622811923612	1.19702984439646	1.09320283526099	1.1755459355326
EI24	2641.74898695345	-0.485245737011314	2.50363835668463e-05	0.000219569956229102	23.0335486560532	25.6196495635138	24.2542133753054	26.186063805578	16.4505290781496	18.1027863220074	25.7276798006734	28.3336089261251	19.4974000341742	19.4807343875219
EID1	2008.64225491889	-1.21298913179875	3.00510054695087e-09	6.22172344732401e-08	28.3475723418971	28.5085258853362	20.9531666614446	24.3617512670412	12.1640344420352	9.4008796380198	20.0039885016804	24.0822715773199	16.1749793051467	16.0387895869351
EID2	409.679221978395	-1.07379397993177	4.87643017911556e-14	1.93945425114756e-12	7.47377443174489	7.81008134200599	7.44688498393581	8.03469307983532	3.75974872315538	3.38489145127827	6.62721990015018	7.21183829631605	4.97491100852537	5.54189722359279
EIF1AX	678.823508551875	-0.599572249642603	0.00860107359701607	0.0318969302685384	4.24452372122498	4.42406956224943	3.13551445298964	3.07953968138162	2.52811258929743	2.278887258898	4.05875502671361	4.30368606885525	3.31493466871343	3.00464895233394
EIF2AK3	1382.60459517139	-0.420257500070646	0.010922495579649	0.0386277498229295	7.33293508436584	7.44306908295102	5.94649020447834	6.20987021401446	4.79619997989881	5.04291187972896	6.50820910085147	7.21957912213069	6.23308660454508	5.91271425469888
EIF2B3	641.839176322478	-0.366015538347256	0.0103563682475932	0.037008411884577	6.43115565665385	7.22313270343716	6.41341055709135	7.45988410209633	4.95857978718421	5.46175147096619	5.22481653146004	6.10073131615063	5.13462289686366	4.17585396102767
EIF3K	2112.27001753573	-1.08219950270723	4.56196378653898e-28	6.98932521348089e-26	62.3845171792586	62.7959260277321	61.7690324276566	60.7140284114954	28.4283339555034	28.7152135372128	26.8041761937738	31.4995006617594	18.846723339128	13.9735001795573
EIF4B	15328.4920840684	-0.525234377553876	1.29149969440573e-06	1.57011011812633e-05	91.7680841071687	92.2932752294444	85.0309041183415	92.796198630587	58.5048033218278	64.3265818117537	71.374133862945	86.1569644056742	61.0943354919994	56.2764436787615
EIF4E	689.045165943492	-1.0040832717072	4.27252970346995e-13	1.54892388570858e-11	1.45168606437729	1.5543056626216	1.36085980687186	1.53687135852737	0.68354763750804	0.752922606159763	1.4578570168047	1.57355771127426	0.922018451814893	0.876762546297037
EIF4E3	336.32047466696	-1.73730876206802	3.21852246218997e-07	4.4476193930451e-06	1.68998896930081	1.90336807167533	0.950673639891207	1.06503553657686	0.414322922999474	0.409493161085253	1.0815006960104	1.29547869426061	0.759534962386593	0.748424087720988
EIF4EBP2	4301.73306129039	-0.663563399074918	0.000489026789038116	0.0028778099519247	11.7694651648	12.2360093198213	15.5092747249556	16.7906390077337	8.11020264256158	9.21995537350264	11.1376708128766	12.4701910814661	9.63933075389803	9.06437873582958
EIF4G3	1311.78839732736	-0.477055275596995	0.00099070998178716	0.00524972005085954	4.67819121843072	4.79587296914431	4.29016143231221	4.43449388292553	2.889984347473	3.49480492900287	3.94145732346896	4.15877333374313	3.83594816266345	3.43725425236163
EIF5A	6322.13922989306	-0.340667522624866	0.0063107368036821	0.0247581544742986	83.7319856068584	86.7308715408844	76.5014217185825	75.5634326774018	61.8175865247537	62.6725988850946	91.0281233562419	93.3482815342878	58.5122514707497	56.6226300557885
ELAC2	1223.17041752212	-0.934392488763058	1.21614112790264e-12	4.13652326882562e-11	7.47946672137626	7.80898855052892	8.85594848333142	8.87713770332378	4.13676046584697	4.2958886438304	7.3192861762772	7.3191437767502	4.59428478321699	4.15196635763735
ELF4	766.058600057156	-1.13922074051345	6.19258821856412e-07	8.11206035857853e-06	5.66274309380844	5.2870143716788	4.10040879014383	3.8311943857982	1.98652020258358	2.2074690035724	4.83956564121762	5.19874445914389	2.59174116841373	2.16257593007432
ELFN2	1951.01684273657	-0.624411395077603	0.0010889407088919	0.00570334314802807	5.86120920685197	5.99745974418416	5.46967317634348	4.33664097557134	3.67703242943202	3.1989396688171	6.02270404877892	5.09815022863382	4.01096497008538	4.94126508159776
ELK3	3848.86304732611	-0.80697116126956	1.15984560537338e-05	0.000111424862165068	19.3084332575445	19.6002980354262	23.9541162505688	27.4983045971157	13.1619567440005	12.0281467096009	21.7936360554216	21.5891398812816	15.8868459885462	15.7722569240988
ELK4	4071.13412958529	-0.401626483769072	0.00558499937338101	0.0223590329378777	7.00319543125183	7.86292731127243	8.07461127642855	9.36974400916766	5.89031590180705	6.04275531179767	7.17029970604775	8.0982667875105	7.4868381492565	6.65517388316547
ELMOD1	71.5891541951335	-1.38669252315729	0.000226467564629401	0.0014927542166874	0.524491194717407	0.881823661638545	0.542967716102845	0.539339653579809	0.18609707463154	0.275412633325047	0.465526043118002	0.613853824925878	0.297216053543144	0.412811739587729
ELMSAN1	3074.60809654691	-0.380864327782629	0.00414936980519076	0.0174961757523919	8.98366785235219	9.43269761960118	8.47081891048933	7.91711577366037	6.45154837593911	6.61269835284372	8.54491709852943	7.79975989655921	5.82122613235298	6.21663559155511
ELOVL1	1950.5426713664	-0.5593201106212	0.000143056412656154	0.000999806003406892	23.2469664816789	24.2397327335479	29.0295903150999	29.165911845607	17.3095156605859	17.6848103522633	25.8137216461979	26.8388602577236	17.941718616961	17.2188668541198
ELOVL4	214.912056025354	-0.932568497796361	5.94537499441571e-07	7.79401503174184e-06	1.74191924480861	1.88418418207682	1.84049869729387	1.73486587120509	1.03009697451617	0.816184438817492	1.45124383542661	1.74704425918356	1.10925186632666	1.00913239640062
ELOVL5	2645.93749520939	-1.17588137023661	0.000324285380195622	0.00202753162301869	22.5658223153733	23.2591493490075	11.5951417929514	13.3523864966619	7.29248477024175	8.05617860705171	25.2794038060623	29.3253200505799	13.1250772819806	12.3094886915665
EMC10	1652.66870639812	-1.25172677414974	3.86101622116642e-08	6.46032714156992e-07	17.8028110272058	16.3490853776525	26.2402171802108	19.6590201853107	8.99251758151888	7.42024041110873	21.0434727427061	16.7548437940787	8.52580144010817	10.8868319411497
EMC8	562.728259722687	-0.601619422611974	9.59694061819747e-05	0.000704829081917554	6.88378284202336	6.57663702969027	7.23588828138841	7.2149229871594	5.02724783103542	3.97045262602505	6.40189942362862	6.62562385507513	4.59046702413695	4.7321173839215
EML1	403.13382706813	-1.3814990123362	1.01992835143591e-09	2.28047177968901e-08	2.74504242077099	2.7341694626755	1.914810868147	2.2811371732912	0.847568558950098	0.966961873864528	3.06158466606734	3.45691570813652	1.50637735671274	1.65193641054483
EMP2	778.80440255062	-0.522644862591891	0.00023561657801285	0.0015443930386936	3.40815314098897	3.36481097003506	3.80363848707281	3.77418941069501	2.23173749711535	2.64227130786553	4.49799390653684	5.00859749599185	3.1768876215437	2.74223001137487
EMX2	110.040561850367	-1.03865469199403	0.000239065423186191	0.00156234929195753	0.97260564275031	0.718449883743501	1.14395637262741	1.12501399440643	0.443745025836784	0.498113133592	0.769895151568419	0.910600421625231	0.523244917706626	0.576839673651247
EMX2OS	178.160926690639	-1.9899792766926	7.37167220441951e-17	3.84264770916176e-15	0.713079985165797	0.725435934214954	0.593871524994984	0.59898153830577	0.177758609245719	0.146766595284866	0.511915318255165	0.493767436795684	0.24686841030559	0.231136054443096
ENAH	4561.79289983225	-1.34860187468208	0.00052569639593707	0.0030548300791607	12.8282948598978	12.7908024963784	5.31549826820165	6.37910131114206	3.49145024559503	3.69517193575448	12.722649546965	14.1783459920177	6.23733149596277	5.66395200434688
ENDOD1	671.224506300706	-1.36024072811769	5.08835790127808e-12	1.60092460468962e-10	3.2364380319692	3.38653561789188	4.41202010325081	4.488019127428	1.46731707573232	1.48184819584273	3.77719398735648	4.02519465021878	1.80817745096931	1.47777989268659
ENGASE	1306.86454314628	-0.618188061958341	0.00319774195591701	0.0140361274343054	7.92575550935282	7.35189483664246	7.15527656099145	5.9234774380424	5.27669476172512	3.76566104397104	7.49118032084523	6.30714896842371	4.99485981292001	5.94758413847445
ENKUR	40.8671004096767	-1.17870834904124	0.00185558626378644	0.00894489039169719	0.214610749949578	0.308486013758966	0.315735631257275	0.323004678896335	0.116758738437566	0.132476939549028	0.226758359557943	0.206366038996711	0.221608733899818	0.216680797690421
ENO1	37033.6700336327	-0.813240205852424	9.38042086839436e-18	5.52754633044281e-16	292.274015131013	287.829374834386	291.749878805125	275.102082142582	157.377499139254	161.560602371543	294.864955082107	314.125079611494	169.012455657475	161.973446537036
ENO2	4058.60952854878	-1.23268191640336	2.04035786887062e-18	1.27478954934864e-16	41.3339182486736	39.5726349999428	48.8030295822367	49.268855933754	18.4628670403058	18.704686502039	43.1119646734054	45.6741449625711	24.4318593221499	24.6529181202233
ENPP1	169.689440812705	-0.939779076696713	0.000577235467856046	0.00330419483695766	0.692287408334169	0.677054042875436	0.450726804060479	0.517623461504662	0.280197961480242	0.315346910038998	0.730427510919632	0.783434630835529	0.502255123372753	0.506764690453055
ENTPD5	1147.93470583952	-0.730643004307549	1.00935092157148e-05	9.85249522834787e-05	2.99692414102893	3.52700069281164	3.3159054991809	3.547400651859	1.7100085057816	2.22467168019959	2.8062975541845	2.90654361000061	2.10894673223281	1.91255993014725
ENTPD6	2003.18623386429	-0.43031900462303	0.00737433897315633	0.0281230472658098	8.68532599603262	8.79237470969596	11.2248003230397	10.3816708905498	7.51834038384243	6.64046069769142	8.92038265233862	8.79195891560541	7.51610718850663	7.65496544622441
ENTPD7	1908.84614909735	-1.41799826567972	3.16554987893542e-05	0.000270091154077304	3.90089343141547	4.23999614010794	7.72073606068192	8.56877988024818	2.23621303731814	2.21218074977827	3.14899615687835	3.54804741244299	2.21526220177569	1.92310539943168
ENY2	767.970346815175	-0.619923593427958	1.06895489019856e-06	1.32446668146332e-05	6.42155362985328	6.65443379171416	6.06696647192637	6.05344342214771	4.0085597525682	4.00077338152978	5.08960012621757	5.38303993667438	3.49636379957155	3.2914539443018
EPB41L1	1206.0167540851	-1.32425412622272	2.24938723316259e-24	2.40193658552071e-22	4.35647963110099	4.6343597271647	5.05994118988485	5.2280924082622	1.84830557696866	1.90892527878939	4.49482034889911	4.72384215049605	2.38945827523393	2.13547729984029
EPB41L2	3378.93723552733	-0.639950585757137	3.30529929808832e-06	3.63067757687146e-05	16.5605374505962	17.1625401122573	18.3735944512987	19.6879642030862	10.245981812499	12.2317941491264	18.4106173623531	20.6359989310028	13.8370752860214	12.7240395503082
EPB41L3	1883.85890388045	-0.990595286704066	0.000293485359475152	0.00186004264337867	10.4248763993116	11.6217736856614	6.82283133629258	7.03021413787006	4.23223469240489	4.61308530251482	11.9360955386709	13.6915031682564	9.75505325528213	9.0884067089643
EPB41L4A	321.502145873899	-0.638421675089468	0.00180682771792841	0.00873614093363904	1.85579558493329	1.85332673059547	1.48242844404406	1.49427120271808	0.963282330338845	1.13438174789165	1.32317496066601	1.49400117330312	1.72982894842119	1.5110257523135
EPHA10	108.959106214719	-0.790461679709045	0.000357527205484602	0.00219869872022101	0.389118613010088	0.430187258294562	0.423899293520943	0.403897666621339	0.248199467869388	0.217151232106342	0.590826713081036	0.596811373689756	0.282853143050008	0.274332959351992
EPHA5	256.828856673007	-1.17248770133692	3.93185849028655e-05	0.000325542362501685	0.825808215853988	0.816409935877121	0.519367994887216	0.585396295430073	0.262407007956123	0.333179785512126	0.465929540782358	0.665902430331307	0.58035819156018	0.509446152560155
EPHA5-AS1	22.7298647390433	-1.49937858306971	0.00549665711061424	0.0220554774839244	0.711868294451837	0.575048195940996	0.457388163940915	0.374506132937297	0.164804744370667	0.201218529067155	0.328766534457157	0.396283467981513	0.411980909207379	0.172037557724468
EPHB2	1573.15593497577	-2.88169597847593	2.94060551771087e-16	1.43519469851933e-14	5.70709454564709	5.68392135538393	2.92230645138313	2.89757151963889	0.5754766989827	0.569514604780703	6.30800356994424	6.43213463559535	1.46603755488044	1.41011693027725
EPHX1	229.33365057885	-0.551050781695172	0.000981459537139089	0.00521324557879217	2.17860509584999	2.51417881625333	2.31225737096812	2.32596036788056	1.57354500395799	1.53334793978987	2.26740909895799	2.81981205868443	1.60067227956475	1.71726722904095
EPN2	1008.75931200665	-0.741723691979339	0.000147717060701423	0.00102789371741642	4.5314131425479	4.34474692182541	6.14958768454654	5.79506691604734	3.20450213690311	2.87220202348908	4.61140922221746	4.63049241097902	3.63132910797248	3.66970610172261
EPOR	80.0445442133367	-1.13016646208335	5.48087139393127e-05	0.000434011115009775	0.788336289806112	0.735919545304397	0.892549535476961	0.719308573912834	0.29734211613253	0.400044269977435	0.883325533546275	0.573315684704352	0.330355309767616	0.310391619266818
EPS15	2983.96434316245	-0.485642628644938	2.94691850214265e-05	0.00025377202878422	12.8102094727031	13.0528338737741	11.9294224108066	14.1351513173632	8.9770568979637	9.13362574344184	12.9352383936047	15.1093142012245	12.2596160159134	11.840740629171
EPS8	1198.23852858697	-1.1982652377463	1.43080520479692e-19	1.02895334299252e-17	7.57712992566547	8.0877872499129	7.13689214963017	8.40872494061684	3.18975605936845	3.4495027503825	9.36225624379153	10.6748943199675	6.34042605856612	5.76039756416395
ERAP2	214.687063390889	-1.24795116549606	1.13136524916253e-11	3.41327471318402e-10	0.866197510783298	1.02129794311734	0.943835636009986	1.00480756458362	0.384614344878239	0.402638646241573	1.00609319478835	1.03341283652024	0.583625290210634	0.443756502992535
ERBB3	221.37495253852	-1.29154863502093	8.92515082141606e-06	8.84433252657646e-05	0.702371695383717	0.789315216650804	1.16684288878574	1.19452099023679	0.356284146522467	0.410234966575472	1.09196760903308	1.30352841804276	0.508939116081229	0.433226016809705
ERBIN	9960.68398697995	-0.991076438759111	0.00011194011956873	0.000804352759658018	41.6773718020644	44.875134424305	26.3819326906144	30.120912985204	17.1206179419457	18.1117677259354	47.1613813747851	57.7252784028276	23.2548274176862	23.4125226407419
ERC1	6614.92399544972	-0.416730039014495	4.78157007092654e-05	0.000385743970144939	15.5909829449115	15.9138984837144	16.4130100497011	16.8427656433504	11.1924265805886	12.4935733654033	17.3236290802507	19.6769064874592	13.1874437579715	12.2096831765089
ERCC2	745.576584112393	-0.818310776695884	7.34583388187211e-06	7.39669820385834e-05	5.33689535705463	5.63052085096621	7.39730703675837	6.53624133440265	3.6173837264327	3.27620774088169	5.18114265862771	5.16879225960207	3.90984942014272	4.8227425708906
ERG	78.8980185132868	-1.28696678063716	5.8650993163636e-05	0.000459276377133379	0.236672388672756	0.23165648348302	0.288363960284719	0.349224547620143	0.0915215465899387	0.128907666285115	0.256624263730065	0.266184699320295	0.102559545291262	0.14495446178958
ERGIC1	1876.05153051809	-0.752767566719556	3.35255846618066e-09	6.87645257457941e-08	14.6271260581097	15.4112582822902	17.355758534725	16.4364201975537	8.77050602605504	9.71653847360213	18.8533551643384	20.8845478374695	11.2650971394529	11.3192699993592
ERGIC3	2250.93659207889	-1.28966004824581	4.04260624348786e-23	3.91355381340729e-21	40.1694764703573	41.3270714265492	47.7320402452467	48.0246004937686	17.9277942867422	17.4638828199748	41.5879580522163	44.454634461685	26.7565540513051	24.1436796934968
ERI3	976.351536238195	-0.456264314288548	0.00215842838791684	0.0101411882016397	13.581024788699	14.6836132735672	12.0458280124169	12.4381034394683	9.46388896902627	9.32369845227409	12.8198609605065	13.6871342184806	9.93518567208699	9.82154329813366
ERLIN1	2069.41325017001	-0.84636423681535	2.78931670019553e-07	3.91905669383932e-06	15.8310241094282	16.4127045576748	13.4565873424267	13.8113949124976	7.41394210421002	8.76144015282345	17.0546677683004	19.1578416282807	13.4235551939531	12.1268511784137
ERVMER34-1	160.299042594823	-0.828745980168583	0.000165257245702081	0.00113338552433825	1.13471689431743	1.38565959293655	1.44280299888364	1.47027545741735	0.666078940460243	0.8222658685297	1.50005336662082	1.61064388617725	0.879916232800405	0.746187691744952
ESPL1	2340.22829132566	-0.679951245493363	0.000154938138265492	0.00107347819823032	9.60929921124074	9.78414175806699	8.01900808301167	7.39917900150744	5.48053847640874	5.14934713189399	9.77112398516665	9.75929794455632	6.34528148551221	6.4357190465767
ESRRA	607.817948168151	-0.700775179869167	0.00348697340487559	0.0150987919440902	4.99929519531666	5.06593989094451	8.03600626470114	6.10598666732734	3.88690731546736	3.38223366837387	5.95217818762715	4.34611771817516	2.84109306863499	4.0778309753978
ETFB	549.497601504031	-0.525688142156218	0.00167432677233535	0.00819215867863832	9.01185567459533	8.59221885393124	10.352805172278	8.44579268667286	6.72224344982403	5.64244509784173	8.84475910985312	6.77987405077464	6.7022309194235	6.84270487354705
ETHE1	389.160076545468	-1.59608288588545	1.12591493873218e-08	2.07505181020107e-07	8.90435776348059	8.56163209744766	13.9099228468556	13.051818464313	4.12818981597817	3.04737723098011	10.8102611342649	10.7268697900474	6.54824288561191	5.86696595254152
ETS1	3405.44046218107	-0.661686974153598	2.40314933390886e-09	5.05867241507051e-08	13.9589965135883	14.8528742617546	14.999802948471	15.69402042344	8.66206654958369	9.6986116267828	11.0389357083942	12.6710090904792	10.4823794911559	9.88262526114823
EVA1A	788.789754087901	-0.658736589809502	0.00331143644607768	0.0144559461703277	7.1579389567071	7.95444835002365	10.8354763934404	11.0230340799	5.92907020931718	5.49014513751639	7.60907360782639	7.39938211690234	6.8148427066919	6.81543317554718
EVC	718.944791736461	-0.680917219147573	0.000624915356379	0.00353917829123806	2.18923370314375	2.32576582902543	3.0836158927788	3.06995879718087	1.65261848056638	1.59352629137089	2.00559549199429	1.96873387090302	1.6652338240333	1.80114489902727
EVI5	1277.88893273762	-0.613045244856932	6.14660148611696e-08	9.97209683092953e-07	4.28413775380339	4.26449970203777	3.96514108803763	4.24999907472701	2.60859580586707	2.7448631945207	3.79137569427876	4.07473470550882	2.99965981526438	2.9647530079969
EVI5L	163.267472342645	-1.1628253656377	7.64065710314781e-05	0.000578516276322997	0.968757910164142	0.827773244747444	1.49127770812325	1.21088961526972	0.516964544272965	0.464644242497504	1.53315290515741	1.14278853398625	0.851036226839657	0.881871409554979
EVL	299.492001494424	-0.833753055823925	1.56663384767212e-07	2.33721606791999e-06	3.28604900380527	3.02881551585197	3.05674577457776	3.10590643402257	1.81976719126898	1.60701000100766	3.39656986435081	3.36595823989658	2.84108972124993	2.89119757254384
EWSR1	6088.5511372288	-0.805486717515264	9.2093429076814e-16	4.29257705530261e-14	48.0821717639742	52.7766383237875	53.4754651988128	53.3528157529668	28.2962614036301	29.7209719297107	50.654372866177	53.1437908805704	38.3072756348417	33.4650857824758
EXOC5	4080.22544172028	-0.830819935510504	2.33094750212648e-11	6.75476382236289e-10	11.5788572376822	11.7106965933031	11.5144699519191	13.6705882658982	6.91425466851159	6.39258334578062	12.7282190711106	14.8135869900061	8.65522548701588	8.49648694258801
EXOG	793.500486831179	-0.322196547043861	0.0109689490427633	0.0387520417778028	5.08079316883568	5.16834223032452	4.67417168472751	5.30363948685426	3.82282956584501	4.07700464531353	4.92662183971744	4.96944459782156	4.24912563734146	4.38826768270494
EXT2	2466.47489621785	-0.496386321644465	3.06068043226088e-05	0.000262414250783477	15.5870547120873	16.0090578005796	14.0671293540247	15.5230078289952	10.2602398144655	10.9272840090635	16.9627876230633	20.0072345757846	13.7999299691791	13.5491523760638
EXTL3	2486.35350236445	-1.35789096939819	3.44006606868073e-07	4.72044579938363e-06	7.96028958203617	8.11344025604321	13.5860156204027	12.9348259588612	4.0691955029225	4.02760785105364	7.54792304425886	7.84355665559983	4.46787556027992	4.44739473308462
EYA1	206.468167336921	-1.95424442329108	3.85086831260059e-09	7.81664156678684e-08	1.58717292435327	1.66970526599209	0.905640594555405	1.08079392704715	0.317621443809177	0.344180183821794	1.65691951575013	1.76048754681219	0.98239930339718	0.949725430718446
F12	42.532210804914	-1.76697363944878	0.000502200017820149	0.00294059890793394	0.399825442681944	0.427778869057358	0.928774330423772	0.588684295326426	0.200973801201407	0.136467564082112	0.494130658867546	0.332373971213688	0.197018336639479	0.222134793878021
FABP5	615.157335067871	-1.18296907866258	6.77609214257366e-09	1.31629512083798e-07	18.6073881218024	19.8210841560437	23.9346658565662	27.0826093604125	8.92259311378765	10.2792113966549	10.8895802994088	12.1232382961294	7.15854402106161	6.3364127215853
FADD	614.268230876017	-0.894149028298918	2.49735370137653e-05	0.000219127862871281	7.18659941876485	7.07527319109341	10.4589591378869	9.14290919836231	4.59290944600788	4.29910500041482	7.65702522327184	7.36746883267544	4.56857665783951	5.2998801748097
FADS1	2993.47109206893	-1.30464094106131	2.61597483437724e-10	6.38377570732584e-09	20.1461228840676	21.5345237639168	14.8686894193713	16.2555149570483	6.84069724555915	7.57460293186392	22.078546495938	24.5388916673242	13.1876028888149	12.5638892177343
FADS2	3366.98551331064	-2.12476794484106	2.89121291413248e-36	9.09647863108932e-34	27.6429565900526	27.7815722563716	23.0922383281965	22.8864859017237	5.25601242029368	6.10921811862223	34.0499498874689	34.3373697689152	8.17715348610803	8.82469041758181
FAF2	2389.71472887419	-0.767289143902814	9.76937705678552e-06	9.55188346395587e-05	11.2687169305824	12.0203493551358	14.63379902757	15.1154743267533	7.05120201426284	8.14482690989965	12.8843228635134	14.601876085419	8.81557783656383	7.83716808437138
FAM102A	1151.82625577663	-1.70198105951628	3.78703674801779e-09	7.69594007650812e-08	5.71072474282341	5.5211690150039	9.93735588722813	8.71174012412611	2.52199054543497	1.9564046928997	6.55299553514833	6.21012709660779	2.54882703898548	2.28242874560955
FAM102B	1308.21876170489	-0.773820184054878	7.36909958628413e-06	7.41497233642148e-05	6.70682439231314	6.72231261286929	5.15313785541479	5.93251926906269	3.63249408472426	3.37873794519391	7.19809905709801	9.09066397831558	5.93641152297976	5.42243696220279
FAM105A	318.179329708487	-0.976945756242544	1.17031026317662e-05	0.000112307715288175	0.968748702889119	0.985214551406476	1.33082313934221	1.38407443801389	0.564201372665671	0.592635389667423	1.2601606516474	1.44828969588919	0.880065087921426	0.948086092448361
FAM109A	434.245877431493	-1.17173615710519	0.000551362360623738	0.0031725843996831	2.43642961761962	2.50986376011184	4.66130601429963	4.56756657315653	1.75745329596626	1.30928002359236	2.75606424453475	1.93389009965978	1.2534565556881	1.94341413392293
FAM110B	161.633649512618	-0.64624342268959	0.00256282928602006	0.0116556687321691	0.804010743347425	0.797717490847025	1.01442321743017	1.01791828599687	0.577307095607963	0.556990209466797	0.729807370843154	0.751584006515973	0.582814339107073	0.788072228138478
FAM114A1	1705.64420220856	-0.361870205944121	0.00662175538660219	0.0258173729047453	8.74548314334563	8.86885458868496	10.3427976274039	10.4902365386367	7.47681050454857	7.12823203865496	11.3952687299189	12.9842063913601	12.1137495596716	11.1752643590498
FAM114A2	565.357531990362	-0.430634401211501	0.00409259935451027	0.0172878225910133	2.40627229714518	2.52025882381334	2.6711597657321	3.04090396020356	1.90190679237917	1.95029346757604	2.21940708634496	2.57502326029547	1.8180991739827	1.78381506884236
FAM117A	96.6760389253679	-0.919570447781727	0.000169961240008403	0.00116112721508649	1.06463657251564	1.10421666225462	1.10500080618978	0.9172548512383	0.534027402290467	0.547150765188959	1.5374995981938	1.23851333554428	0.573351731596511	0.60034622536717
FAM117B	232.945591631139	-1.62478169609084	9.43696119718359e-07	1.18697337943977e-05	1.37107012564357	1.43728661208348	0.860791006875707	0.813339918394201	0.319203923294755	0.391597120053609	1.04054487478063	1.16219529932795	0.591462834121249	0.600660058581168
FAM127C	177.050856088058	-1.22760371171319	1.52030701991898e-07	2.27387855551379e-06	2.02559612116698	1.96054443411462	2.66840625197919	2.64896672061598	0.954132730567022	0.984911747539231	2.17529737084435	2.06484543842999	1.31183394773928	1.39440967839832
FAM131A	294.698549863619	-0.956200856556404	0.00146676840229827	0.00731474454573825	2.00196252519809	2.09122102105601	3.60964116167127	3.13608179146623	1.51272982271605	1.2127630846379	2.04958767251498	1.83551568902629	0.979599050781989	1.16403647513276
FAM134A	2190.66009008264	-1.37669866543677	9.08828840257636e-35	2.38994855768646e-32	11.6789985209479	11.6146633793749	12.8439622471072	12.8792847641569	4.44576416024427	4.7682656172125	6.71161847025663	7.41748489050411	4.07081527669679	3.9525664329627
FAM160A1	411.552242065496	-0.998435113285538	0.000998384999288747	0.00528879894842707	1.58947024665453	1.83516760893029	2.85969093919568	3.05734469520613	1.18161238143885	1.09628040825464	1.82413492349735	1.99544993682296	1.33340856371467	1.13943865605851
FAM162A	373.53923235347	-0.369912843183289	0.0118094256044094	0.0411531387903657	9.48787808424658	10.2006372659016	11.2423063326647	10.7030953742165	7.78331213147824	7.93900743024742	8.53163915727678	10.4896532260408	6.24450558400482	6.04081758477621
FAM167A	34.2567642241022	-1.25156272903302	0.0106433853295271	0.0378076222018019	0.191641334884529	0.140864979163329	0.343997435482485	0.220071434452866	0.0947838671508799	0.089424994960458	0.342150059221454	0.20161607550842	0.143152377778885	0.129863557118118
FAM168B	3626.57731146505	-0.372570934241614	0.00770535632717503	0.0291644840233076	14.928955657958	15.4108680429712	12.6528507881516	13.6686192261573	10.6397320774679	10.7525751425052	16.7329278321347	18.822454231541	13.6081732779556	12.9796872021581
FAM171A2	131.443121999401	-1.22906243416394	0.000144585867573196	0.00100849501218216	1.17763778871345	0.999287540360639	1.77656337808264	1.37516115001652	0.671990719488996	0.44139736558467	1.62299426844938	1.05566226390408	0.889783875852661	1.5278865160037
FAM171B	378.736507065926	-1.03954748600347	1.17033199035792e-06	1.44095592858953e-05	2.57751837113375	2.36928124337321	2.84228912746649	3.32084547882094	1.1322039579687	1.50197887125908	2.970022837521	3.4970569055206	2.08578131223992	1.89387702698635
FAM172BP	17.3412577949988	-2.69623047473378	0.00954654123970577	0.0347220010544319	0.0776775582969278	0.0546140342630962	0.424036464572608	0.359081744701895	0.0211301943490496	0.0469071516561777	0.104377149989189	0.171968562425227	0.0176071724813756	0.0220575387191393
FAM175A	563.06458740652	-0.771262059887239	3.21696318668799e-05	0.000273947193747006	4.34470870849971	4.47264913490746	4.85829963391818	6.03588678129422	2.94620129518366	2.69129782627319	3.93752369590179	4.45980684588176	3.90116599985172	3.64994888475128
FAM175B	663.120047784348	-0.552047596171792	0.000182803365382516	0.00123544783071521	5.07044675280827	5.26156571002875	5.13488064026089	5.94420731715822	3.27397954487832	3.84985116859936	4.88378312591461	5.51014454991885	3.19405113294955	2.96084859227082
FAM189B	956.640572941448	-0.624759106436278	0.000225809807412876	0.00148897567245788	3.53971743340992	3.21493303698988	4.36743769716834	3.52627772163944	2.39203660347427	2.24878878812931	4.11467353411452	3.46934199595622	2.10394820402157	2.26316875405594
FAM214A	399.960921781917	-0.571819959667297	0.000217295665526012	0.00143929786876045	2.07968872126486	2.22297692454275	1.85842434646575	2.17802207930787	1.37256439476659	1.36708197804665	1.78475283372521	1.91132730138456	1.96997769723148	2.01028163495444
FAM214B	1144.82791093395	-1.3551143242454	4.78250957680337e-08	7.88241686002793e-07	7.51143614756734	7.16652413001904	12.0679529191207	10.4020256789313	3.48041598309107	3.59912795427444	7.69243652646217	6.63072889770889	3.61307709108324	3.74669788029458
FAM219A	1041.35098697823	-1.09348483184739	3.1123082246399e-17	1.6977015049514e-15	7.33621383915429	7.09739716379082	8.27656358628757	7.2558636784724	3.4457868784765	3.41414571980446	7.82055460844924	7.39233210936994	4.11290506814948	4.326136899526
FAM220A	1237.31948105503	-0.489893369996038	9.06733433044789e-05	0.000669842195254346	13.1649252003848	12.0810239938817	13.4951200213163	14.6377239293043	9.18841347562485	9.37456587001756	9.36310034494953	10.2985718634198	8.38648950233327	8.84856995324495
FAM222A	25.7249696401705	-1.89357637767816	0.000739503624677551	0.00409855752223774	0.283869420846257	0.199584727123895	0.303330597404324	0.146483650556809	0.0540535943021469	0.0685680974846674	0.375573635237925	0.211388397196557	0.154427238897161	0.185399232689453
FAM222B	1675.29189368616	-1.24658263240397	2.41455690879894e-05	0.000212816799280283	6.71875549388696	6.79946420209028	12.0329689225857	11.593265860397	3.47386816720392	4.14850456743704	7.46282264153154	7.25069679034081	4.47776204523254	4.79847230695776
FAM234B	602.97381627718	-1.00566522227565	7.35675470252048e-09	1.41970055973394e-07	3.5305860016965	3.55983572812635	3.06342823395363	3.10398057451545	1.44112321043295	1.78239210740233	3.7392935456996	3.92984718541137	2.41026905060003	2.33714628972455
FAM24B	209.820884578533	-0.627527087151523	0.00493015513496268	0.0201448059654238	5.35733667611609	6.88391508558727	6.86610912980097	7.52199237979056	3.67472418111079	4.71325733305876	5.13175520460498	5.76293140543701	3.95186372251186	3.54092069101416
FAM3C	652.688497093168	-0.397410303443553	0.0147724878442834	0.0490902420461013	5.78570995045026	5.32519061072031	5.9217068137263	7.07941883557451	4.6738709786042	4.26880914065048	7.45181973259983	8.57451968172097	5.74652187072371	5.54612167737146
FAM45A	486.667560595683	-1.31131213077741	3.37743488029355e-15	1.4876756288973e-13	4.22183584387322	4.78280276449712	5.21098879495509	5.26431283150523	2.05207600131472	1.78221058725738	4.61006529946255	5.37384348329753	2.87989030519427	3.01590172358877
FAM45BP	44.6763502432263	-1.7867261228414	1.19749118906943e-05	0.000114666289457686	0.511984034024106	0.589949206972042	0.50380623494931	0.405162364141474	0.183761891621522	0.103057276155655	0.514503671128938	0.479434782632539	0.298187684733947	0.383653360928627
FAM46A	382.411841561965	-0.884847046278253	1.51737548918931e-05	0.000140856895384755	1.48664216436918	1.47852024439735	1.95544787644596	2.03192121299067	0.920276065094234	0.916921141096641	1.27725235126101	1.57593509385397	1.38247050644928	1.55149551567944
FAM46B	225.02462911273	-1.36461299063469	8.05644228555937e-07	1.02951402167743e-05	3.04876236286135	3.00940812642247	2.21534331403422	1.97784808293586	1.05199262662176	0.897855045664857	3.27549173718585	2.69016150096996	1.79574246803786	1.60992623324013
FAM58A	354.66727453591	-0.503716415197984	0.00983545111175724	0.0355249719430199	6.20009514600006	5.88346711325224	7.29748466829822	6.91778778856008	5.2212530196116	3.8524542083291	5.90906640762844	4.97468807035388	4.11596638348997	3.76430436142584
FAM65A	1536.5905225986	-1.50114988541606	1.91650769413702e-17	1.07881626399361e-15	9.08858641807299	9.05911512402374	10.6809521219351	8.90656562353171	3.73986752873534	2.77780382783198	10.784485856601	8.76550248910863	3.77025371274742	4.28818493108954
FAM65B	47.2218473951015	-5.01813742749908	2.23608864242117e-10	5.56463923599133e-09	0.157798800545063	0.137933100410408	0.210523550153979	0.215491000290809	0.00290034665257589	0.00772621385532974	0.0573075500538729	0.0450632061009342	0.0120838698698436	0.0242210772059448
FAM69A	337.511575683977	-1.06476563127426	0.0104028070199387	0.0370954849346457	3.78514545207401	4.04450495752842	1.61021364731785	1.89237591159789	1.32227356070517	1.33392496326416	3.15136759722367	3.73955574517834	1.89068306630841	1.83768337465239
FAM69B	140.705345062771	-1.43158114359557	1.37879526367723e-07	2.08344714843303e-06	1.37483287628367	1.40697826315583	2.10249770850891	1.70792991023392	0.602536454541987	0.590378957605774	2.70003893134977	2.21360795007747	0.640579713477297	0.694046976663919
FAM78A	89.853698051229	-1.25889245862423	0.00460543590358961	0.0190432234652301	0.457450955930802	0.343918560275687	0.867994336090383	0.783931918005688	0.20328954128878	0.295386346786082	0.411976415177779	0.364622921993622	0.359323203650025	0.366546865795757
FAM78B	229.06874032059	-0.77496141810141	0.000452867235053368	0.00269563101838016	0.92697333696886	0.912080188883733	0.708872779307964	0.735740591227177	0.43763202262675	0.499630709475728	0.615011242597699	0.801763028473126	0.65408337995381	0.634497850456547
FAM81A	148.260549807776	-1.05993900723127	0.000131762522866462	0.000928238260849341	1.03322575705252	1.22158744285543	1.08065613389984	1.13287588744014	0.370555246488848	0.670496344261834	0.54195827879002	0.739717713373219	0.518505336675804	0.467100819934714
FAM86DP	307.356661536028	-0.628398705224863	0.00553624888882653	0.0221840275579337	2.45423578294294	2.65082923287778	3.41237712382348	3.50261152465347	1.6835435972478	2.10492567418015	2.32354339478052	2.35517889613981	1.56409445408677	1.93923261396678
FAM89B	306.385156592136	-0.565074079481167	0.00779329467832116	0.0294340962352284	4.74408494931977	4.28113346362382	6.36221771904054	4.95554457750742	3.40920033826102	3.30782284271712	4.03160458968214	3.77737343138577	2.99321932183386	3.40257958389685
FAM96A	921.172046694466	-0.583301287972649	0.000328646258927078	0.00205006318237694	6.03285841639181	5.68049841087923	5.82415699028046	6.79323242611013	4.45889637064779	3.47906617803325	5.87485133112751	6.6662909801441	4.77624489582343	3.89029638447224
FAM98B	1393.51289012883	-0.765791737224178	1.29216168413825e-06	1.57011011812633e-05	8.56004745182506	8.42640532064101	6.7430075620717	8.01887823615569	4.70239521677753	4.42579879543924	9.03272031928653	9.81191308774085	5.66805096853873	5.62979969550757
FANK1	180.117779108843	-1.45810373425687	2.16600411964601e-13	8.08534461526334e-12	3.90653386934966	3.9458639755087	3.80241918364533	3.56385152142361	1.2722137847657	1.42871366086108	3.38389382096361	3.15601395814479	1.46543029298116	1.32804764371484
FAP	1105.73204610236	-1.20421405193111	1.03763919284416e-05	0.000101062271634722	12.7527675021126	12.9658147624777	7.64011752842916	8.75698997485476	4.70838902598856	4.24270640810907	13.1882998811372	15.4281826410476	12.0819267349902	12.8099591561735
FAR2	214.378899362274	-1.74209682547023	7.75527221223976e-16	3.64373709619873e-14	1.58850131334364	1.60164178474533	1.38375315154561	1.33239759506875	0.391749147864204	0.46908299934064	1.57877687089382	1.76100821360993	0.534163252292994	0.576236325155384
FARP2	443.990203596678	-0.461017864221506	0.00718220687005879	0.027569347024742	2.41780851556865	2.51600228449431	2.16775154807812	2.01059874029278	1.59967637783647	1.63468836170779	2.71037754826417	2.56499566747544	1.77000071837839	2.02028303612337
FASN	16171.769532945	-0.893782516574759	0.000161264627941321	0.0011111933827525	49.7608931478461	47.2341207849838	57.1326004044986	40.7906510936212	31.557088360724	19.7459420557117	61.2534600212399	36.6785138507633	21.7354330353774	34.9440585088483
FAT2	10.8621581853983	-3.87191226801356	0.00172078170738211	0.0083845279044152	0.0183960508005761	0.00862267533254031	0.0313376050894492	0.0355980665652125	0.00166805847657777	0.00148117656922025	0.0469031036542271	0.043194872844869	0.00277988861067399	0.0121888538636135
FAT4	461.820771284051	-0.544060684325061	0.000499368799807839	0.00292596570795288	0.642683468883917	0.777731500582067	0.664234335327344	0.677836823050015	0.481447466180878	0.443539775786895	0.771776029922497	0.890516146045479	0.93022703979926	0.998871452755958
FAXDC2	10.0783404422731	-2.3574960812081	0.0147452966234911	0.0490646612293277	0.0529689655537485	0.0496556785607683	0.177730560897477	0.113888741188936	0.0160098369201284	0.0213242482108143	0.12775114263984	0.0473805157136644	0.046691849771096	0.0417811582704066
FBLN5	131.377997348868	-0.634604645559403	0.00204788191350934	0.00973075281394849	1.2119380682176	1.24720367117574	1.24249389838202	1.18643597335084	0.699872483547519	0.834067233664613	1.64460563901719	1.96904686792363	1.38889696409059	1.13433385122106
FBN2	4665.11362099109	-0.777384491007575	1.96726220563417e-12	6.50303804898096e-11	10.0671680113858	10.4254545040428	11.318191704568	11.8181440256863	6.17703519008207	6.24790662839402	13.7443328281804	14.5218524825317	13.4688589415875	12.2778772462201
FBP1	3.94505871961881	-4.88062383836385	0.0113459949718301	0.0398376017155589	0.0992594634139473	0.139575956162367	0.0115287362720245	0.0320127131645588	0	0	0.0615587354527639	0.0799084532832347	0	0
FBXL2	502.060571664643	-0.814292904929159	6.2278712486304e-08	1.00783661756447e-06	3.91599758520217	4.1529057794001	4.34127630224192	4.47182033227593	2.12564472602852	2.55493873640869	3.39049099211036	3.46829323400333	2.59287623753858	2.3370513711396
FBXL20	1462.54382283791	-0.592847073479009	2.65683609884601e-07	3.75387291303671e-06	3.51010377053966	3.46762553892968	3.40073842957982	3.3156959762069	2.11380817879382	2.32082633087348	2.4726161256192	3.0449192714378	2.54766762574834	2.27972343810794
FBXL7	276.518589546306	-0.899083863529645	7.91847414306244e-09	1.51647386876758e-07	1.39221777445826	1.40499751693366	1.53596120421186	1.48485865438381	0.774421840595063	0.749770175380457	1.5377633420438	1.50080688057016	1.31558557870835	1.11091046154651
FBXO2	25.9306688958037	-2.73457900090688	4.4139488564925e-05	0.000359377841508971	0.332632063051101	0.27771952933438	0.700248046638047	0.514045152731427	0.0848287977219864	0.0502166358255057	0.290097784215299	0.303349262449271	0.0942471389965179	0.0442758466709253
FBXO21	1151.71931230102	-1.56733254971748	3.59150292795191e-16	1.73366274212561e-14	6.64564266827089	6.2358699121851	8.62366903790511	8.67923415710535	2.44015557633302	2.52789987178413	5.99854223431845	7.20035949628737	2.29582679734563	2.49941146570488
FBXO3	761.872436807567	-1.14970611518316	4.45363067538598e-19	3.02967254322879e-17	7.28909186411869	7.35969574505699	6.67946828515754	7.48619914456504	3.25549114064641	3.09118633250426	6.12899899529594	7.4185686234191	3.72544886055315	3.22618157613877
FBXO42	415.188004078566	-0.642448791951336	4.08451756614004e-05	0.000335473272015055	1.62894995008218	1.69583667981616	1.61980407953565	1.58222928900433	0.917324131398867	1.12173362428828	1.49468583332855	1.83190577499982	1.47045857835201	1.2578419302446
FBXO45	1040.4757424453	-1.4389583982799	5.74424911771595e-30	1.04338067221688e-27	4.78869342907434	5.19459200617343	4.63375162603618	5.22163665920236	1.8355405091125	1.73880466571008	5.02689227855191	5.33208075817109	1.83258325826563	1.64678398372914
FBXO7	1514.35072839197	-1.71071024273692	1.86499817424422e-38	6.44302016313899e-36	18.1735287796035	19.1988265147074	17.3962903326832	18.6930644435897	5.03790839977195	5.91504247951534	13.6030357440056	15.6921735283907	7.42712746844239	7.2817032842425
FCHO2	811.282809933364	-0.519942459183723	0.00704838059914006	0.0271768418390153	3.38931311961458	3.49772134111604	3.84099256341494	4.93263572946718	2.59457872762093	2.7318212828021	3.67717767315549	4.51637572649188	3.00163230527206	2.79991470584159
FCHSD2	1294.86798974288	-0.659403763550791	3.87863581920068e-05	0.000322195589337562	5.99527159020241	6.97321476987187	7.63202341208024	7.78976020337598	4.07175080260868	4.69448654239903	7.07925457706785	7.41150904202002	5.93077409725944	5.46808349884319
FEM1B	2340.40906033741	-0.895228934411321	3.41270181817923e-13	1.2500705474948e-11	8.01238778614054	8.07084541975054	8.02989269470146	9.43716085286537	4.31010571295516	4.49532139024795	6.81488565224923	7.33497218241996	4.54183837492671	4.36776896391195
FERMT1	324.4976329901	-1.80090744523335	6.39445263746293e-08	1.03077640456962e-06	1.1524734763163	1.53297809045424	2.12643523049314	2.34399435005727	0.404821050152585	0.59353801798609	1.20196687573232	1.2502934860394	0.6785734542946	0.751812643966702
FERMT3	90.3765798646254	-1.00503188308422	7.07086393111048e-05	0.000540739296358385	0.998926703357259	0.962636555338008	0.827575335088056	0.878643605367695	0.437052236957126	0.45558019629703	1.01808306760163	0.709985981179743	0.482938109625819	0.743858513329123
FES	318.212064112357	-0.585316530557237	0.00103995160295091	0.00547770023688851	2.41420522418926	2.55502592083168	2.95161943614484	3.10081422083281	1.89239866906702	1.69572863750927	2.24586274617618	2.25681577334869	1.75688960194596	2.10173520437971
FEZ2	760.440238809249	-0.742814390615786	0.000518834292836032	0.00301993439229536	9.98721011728387	10.7964270534473	7.42313946387048	7.97012501177286	5.26199412000604	5.31055326331537	9.39826120360628	10.6590504628457	7.60073104321793	7.4529597605214
FGD1	450.102391595995	-0.614981534548042	0.000254287323561585	0.00164595457525039	2.38944345906434	2.30448229207419	2.95932816854357	2.62705435059017	1.71855206987297	1.56126751091404	2.83618493873458	2.63111900510597	2.26854517023198	2.23210682606785
FGF11	222.24787400612	-1.82831506346405	3.73249414182629e-22	3.3382139230882e-20	1.84489324804695	1.96221452390655	1.81500366256882	1.76984973572926	0.504699430988844	0.511275576495172	1.77189056730176	1.97223480234017	0.91218161390979	0.756882034412681
FGF2	575.647928235229	-0.973428404893904	1.90819282521523e-10	4.76885806914428e-09	1.98428664310234	2.124142478766	2.15798064707065	2.50949299932225	1.12393356611719	1.05840233380452	2.71747193643074	3.07730119568116	1.46148109048797	1.66274083668357
FGFR2	537.057830369521	-0.664908109849938	2.65996078031926e-06	2.98889343038553e-05	1.84949508117231	2.14686805720373	2.20029706904524	2.13010873150423	1.26731267965325	1.29480575520952	2.9096129129876	3.28456828515526	2.69410944076741	2.69367968511075
FGFR4	681.975461038789	-1.03999428503306	0.000940595715583425	0.00503260124897187	4.40673650433664	4.07118003106065	7.40961367691719	6.29671174325636	3.26516831131885	2.00001683847734	6.52512361595565	4.94341390950255	2.59480764776183	3.62149650474359
FHL2	4055.73400852474	-0.516921712218909	2.05273409807494e-07	2.96938604876703e-06	33.4952610219481	34.2546359959435	33.2642688916092	37.2001368753351	23.8594298299169	23.3118382735993	47.8397504232778	54.3534688587071	26.1736621380813	25.7334753275738
FHOD1	1809.12981500006	-0.855357300383551	1.37666944090217e-06	1.66475901710743e-05	10.3235193681493	10.2069213134651	13.7809212288157	12.4045735492395	6.74004565894689	5.86445569061768	9.76627563630357	9.04272265118383	7.17322117742635	7.92417919947644
FHOD3	104.695601037764	-1.68131658986208	3.54967882415508e-10	8.5090872384746e-09	0.434804869003535	0.497046168647835	0.552246494538081	0.57504921426254	0.174438115219672	0.139783147320033	0.375062897271072	0.333669321421501	0.226894323044784	0.111032749957064
FIBCD1	406.454785593729	-1.67524644283479	7.07113535847506e-05	0.000540739296358385	2.31219886854092	2.00663433623788	5.5580512871935	3.85836524950681	1.24773384311056	0.848775239823746	4.29750245143455	2.79106063587077	1.19778314571429	1.80521007710211
FKBP10	3474.40749067899	-0.424907772076814	0.0123179580468668	0.0426301518027393	25.6985814979973	24.4678829757565	33.5828768543684	30.0403687848297	21.6397046805307	19.7305830232779	31.0305421713037	29.3701676854134	28.655948039232	30.4294190106194
FKBP1B	25.5943941925182	-1.98836738379753	8.11498806099455e-05	0.00060686746454441	0.672716967137544	0.515976159041396	0.728070346592451	0.608150032936324	0.12476962958251	0.184651651888384	0.58471999546985	0.584647525694061	0.207933760779196	0.325613537910107
FKBP3	1945.77685209233	-0.852461167859675	0.00234972720553285	0.0108803794045423	42.8403844094596	47.3069440752984	25.9934573813246	29.9496716495095	19.1527093456041	20.4594578626856	33.7478667471041	41.7255306893957	25.8890138894026	22.8118672425967
FKBP4	6476.22938521366	-0.417087486791373	0.000451180284424543	0.00268649727315851	41.6058630745962	43.5286554015078	38.4169049456198	39.4210762479817	28.8162813624876	30.8251080620566	40.3798756919807	43.0479611227607	31.6430328908623	28.7751382566006
FKBP8	2097.34687127378	-0.826501869511822	0.00441813139559593	0.0184277794961365	24.7691014345891	21.7720140679781	40.0154664541866	31.6461809746101	19.6406627936418	12.8822456397433	29.6775749612179	22.0070551376678	16.1296168218766	22.2652420886102
FKRP	258.282256634663	-0.590153584838769	0.002446354072768	0.0112274843469912	2.03209322197507	1.65964409820238	1.93109319275652	1.59432035039198	1.19350016138641	1.15274932800648	2.52477051926819	2.05523897792467	1.07011467982661	1.17302105196148
FLII	6846.47806269744	-0.550946169824165	0.00613251814887759	0.0241665929915174	30.6894173154521	31.7795360865566	45.7683448717588	39.9130236507368	26.0652796665763	23.2655376895826	36.0405288517586	32.1881965106606	23.1622708737409	26.041968664933
FLJ22447	1756.84099055584	-0.668082402678337	4.53319515722486e-06	4.80857107014719e-05	28.7994657751537	30.2903087531698	30.7557019153055	36.7468193344604	18.5042116434342	20.3657274105118	34.8057650156257	41.3735070828815	13.8830238282426	15.5048534503055
FLJ23867	178.963420364143	-1.33546774144634	6.63299912631612e-07	8.62485694513386e-06	1.45057692122276	1.4767506171877	2.02786905436374	2.18040050916252	0.615992622633239	0.761014996530859	1.70289836200075	1.73714092836107	0.900114831041164	0.8853267450737
FLJ41941	15.3086755015456	-2.72782049662397	0.0117734805425268	0.0410746758028923	0.322219833565881	0.337188287203177	0.0609244524640153	0.0483352945300947	0.0203841093026771	0.0362007273815646	0.201383404140554	0.218681792812316	0.0509564449492523	0.0212787101136715
FLNA	20505.4791790047	-1.73949921558666	2.01169720944456e-23	2.02537675046879e-21	74.4774756539353	70.7938237625442	66.9878806117882	58.7357123146324	22.1983058095216	17.5026071559652	79.9033736466412	65.5285233471738	27.5926634511026	34.2962910832583
FLNB	7113.31563753869	-0.961577532410574	1.40407506507587e-06	1.6932237973486e-05	15.621001662484	16.5825346318031	22.5617513555691	22.0176342092289	9.05200617337264	10.1706284380333	12.8446379681096	13.4564623328368	8.28457983846484	8.7979642610194
FLNC	19180.9200393434	-1.61473239741884	2.96107438686498e-28	4.70010537136704e-26	55.5450135085374	57.0623961215101	66.2611253344116	54.7369096951831	20.2322824872456	17.0348726495559	77.9973923837088	60.9819507368881	22.0703248058856	30.1472098384144
FLOT1	2012.04748289096	-1.3716055801147	3.60151797461145e-30	6.75054736113607e-28	3.81051335461274	3.78435604321221	3.92905478653273	3.78996688380593	1.33183592747552	1.55719568369704	3.66592669758323	3.57656334898975	2.21389041878325	2.16444337454779
FLOT2	1952.0589850582	-0.790753082551673	0.000864342884941138	0.00469446895492537	14.6753717120618	13.5398971582723	22.0156182296961	20.7932023817169	10.3965368931395	9.62095188220873	15.2022628108315	14.8781970955263	11.9720656768902	12.152220572423
FLRT2	2817.28318310488	-0.477323014935722	4.81265173339977e-07	6.43354407365482e-06	6.75108530356083	6.84642000166349	6.59015916672932	7.10960754688971	4.87848278656567	4.69984753142694	9.60221512727121	10.6111167466719	7.78081745286595	6.89481505153174
FLT4	522.247008945959	-1.62656342596676	8.00177531721426e-14	3.09853361129666e-12	2.08153728648335	2.00888010081417	2.67043714570577	2.35174774087449	0.853897644935867	0.589735006539751	1.68143637536011	1.45447393031157	0.660930373810786	1.03003078366805
FLVCR2	77.784079441659	-0.821328103024394	0.00525257119044131	0.0212259293129325	0.490394278506738	0.394045193504236	0.575005160210359	0.597492368210826	0.311264868420537	0.259470159829326	0.531025402849011	0.714381991049803	0.354645909955295	0.331556532358034
FLYWCH1	719.583707341888	-1.01787653276831	0.00649813477562112	0.0254028481499153	2.39220014786352	2.45228886457446	5.69199683582559	4.27613084850891	1.99342086451825	1.57010102433962	3.54693485383603	2.32220124193013	1.9765008021892	3.06133354076876
FLYWCH2	118.793610291672	-1.05221881150715	0.00730457553561057	0.0279174222043216	2.41280715525915	1.80625149735183	4.03225128423682	3.8441855130707	1.67627045677015	1.1740033360958	2.58366867863285	2.428026522814	1.65253686025297	2.04558435390226
FMNL3	3249.67147037282	-1.12656932019477	6.24628825316077e-05	0.000485886767030639	5.48731359206614	5.78092382923254	9.69604215652415	9.71261293449494	3.38182700163056	3.46078969940349	6.37159313109282	6.33298410543268	3.88848394655141	3.80615227124708
FMO5	19.6620997124096	-2.31099257436005	0.000185444483368364	0.00125041957614512	0.218908370760911	0.142072150844364	0.215140157862201	0.150857558888402	0.0381720686642545	0.0338954386180503	0.10443276656785	0.107320373891574	0.1145076031495	0.103603064811952
FNBP1	1101.2855752457	-0.713225978015582	3.21531479881674e-11	9.00645968845026e-10	4.97512948175584	4.86570273516673	5.20979873185604	5.09063312611687	2.92750565901845	3.07180021019053	2.81918205114366	2.87031164193379	3.17308835389244	2.97200430567654
FNBP1L	1695.83392404642	-0.932449057412979	2.29908520908472e-07	3.287953108674e-06	8.28501487205503	9.09657769385098	6.5453297880924	7.5763537207285	3.91589380675026	4.15231595019711	9.04128259258217	9.79402150795787	5.99132154631344	6.0008739513717
FOS	2410.12167266355	-1.18303462675509	0.000646857214759967	0.00364586604825843	34.2826915945095	38.9957111569681	27.8249629282727	16.9980089685743	15.336893323079	10.1665708432711	18.1448033561534	15.029898773796	28.3308624921768	18.3088559253065
FOSB	1112.24961378247	-1.22892749945124	0.000239577697816727	0.00156453649289581	8.52164574433437	8.49093473742785	9.34384534616619	5.00948093366715	4.26375537137576	2.29216467407166	4.56760600217521	3.10709714947149	6.25496434421623	3.2845345824428
FOSL1	792.861937005694	-1.02864720749561	0.00143669652040619	0.0071790005652401	7.94231985759395	8.65147988858558	16.0754909748664	14.5076332350994	5.10388212648729	6.15329246303649	11.804364518403	10.059599058831	5.8780134143828	5.86210862873143
FOSL2	4955.0434516361	-0.813976215907219	0.000149689612966757	0.00104120856330884	36.2525504861288	36.00322444946	27.9948567825669	24.6296665542935	17.4789089427944	17.2901218405524	30.7909977154903	29.6803241225395	18.7057457806787	20.5671902482908
FOXC1	220.519630036506	-0.988905423392629	4.24109968779318e-08	7.04278373225523e-07	1.62815450367662	1.51177474026278	1.74697959126292	1.72812341880191	0.752223278533542	0.873950004472594	2.08360880740959	2.16376058829454	1.20088931185491	1.08612113675599
FOXD1	715.83390145689	-1.18769555682549	0.00854852902982523	0.0317460245909228	4.9746116922878	4.15958465272402	12.558244302288	11.9190432523376	3.63916911236675	3.53469749718275	6.54500495309884	6.49831228353738	2.91680791308986	3.30870362104888
FOXM1	7314.83882416052	-0.848042542611222	0.000159628897621109	0.00110146245978968	58.4446140212279	60.4060104969611	41.1048071625004	42.741659786315	26.1406677975096	28.9648254955881	56.5169361226113	60.4208859950779	38.7639948443607	35.8127776341288
FOXN3	2509.86935025361	-0.809584458183339	2.60066644957036e-17	1.43191069296813e-15	7.60269101831181	7.95838919872089	7.64817959958948	8.03591892561201	4.26687874124086	4.43804723106642	8.57796990000842	9.79664108510366	7.79256094268949	7.19105882832527
FOXRED2	1732.28314078314	-0.482567857916551	0.000261567326369449	0.00168687947412274	7.56627391521127	7.61729997222025	9.07402537001954	8.34968369630052	5.47325401139925	5.91788140804824	9.99863833205739	9.98209208545443	6.98855878658831	6.88711610359368
FOXS1	22.7011430588711	-3.31297300310911	0.00133248604661057	0.00675988242304395	0.79802198643365	0.989019552193916	0.188518455337384	0.130868360038424	0.0551902079261027	0.0490069406908624	0.936707859699291	0.857500158582268	0.214612462756676	0.24965351581393
FRK	50.0076154302032	-2.23478163130938	8.36397313720147e-07	1.06631579380863e-05	0.644500162092639	0.527929274694865	0.43606058991694	0.443975543193418	0.0595746879988562	0.15114343706694	0.316919091774017	0.396695405058417	0.163108915308777	0.222104472448335
FRMD4B	104.893099099816	-1.13237887083387	0.00076883546962399	0.00424244038186817	0.337445514679105	0.33948446782933	0.44291779592079	0.586922731910638	0.156720485788311	0.221996865940664	0.362973596382605	0.40031085341682	0.174120791574823	0.202550528681293
FRMD6	18118.2527446612	-0.955096254215566	3.52124330757464e-12	1.12596707506638e-10	90.5834418655927	96.3687597291285	79.1244507428234	86.8738212927695	46.753346343969	42.2370649765723	105.809758306359	120.483097933966	57.1228696487248	53.565416846722
FRMD6-AS2	20.311252148184	-2.03456867591949	0.00659139010400599	0.0257103613554309	0.972028333104958	0.79276707750935	0.316116188466505	0.459791465851708	0.237973917273512	0.0704374567399745	0.582738127466695	0.469516626270522	0.154230766583042	0.276019909271672
FRMPD2	3.71643913629157	-4.7946047443377	0.00495743600755923	0.020242193514991	0.0135104203328116	0.0284969780902931	0.02746102167713	0.0217865982734171	0	0	0.00698241056417608	0.0373880116299636	0.0267960615681413	0.0239778568399131
FRMPD3	31.0252917577317	-1.43037630834513	0.00393204838973851	0.0167097830629047	0.0903065424806082	0.0858017583747302	0.175759562070437	0.112827574492175	0.039836086553452	0.0442162841118268	0.126140344187162	0.112981187986852	0.0746870511232503	0.0450497445020208
FSD1	638.586009222692	-1.15308188538569	1.6382407754149e-07	2.43374065953079e-06	7.59601987446511	7.68186162281907	10.885299212	10.4385132359879	4.38465833090877	3.6486246653969	8.40020660812165	7.47881687970025	2.88788133812016	3.48077992570326
FSTL1	5606.93563290399	-1.41999558252893	9.82150757535725e-50	6.40907933223035e-47	39.5768676662658	40.0040974222897	38.7583143637159	40.9251414337752	15.1416826669926	13.9386799919066	59.4785097475203	67.0486860107971	35.2048192073268	33.08230153359
FSTL3	1334.05278721063	-1.34970891395687	4.31674218600418e-05	0.000352440595807264	19.1049207495137	17.6503162775443	11.2062622294909	9.32678690227203	6.09310738661977	4.93029470364663	20.0116637566121	16.4891459318578	8.07042736505204	9.06197215711305
FTSJ1	1471.83761344924	-0.397873235042077	0.00611916760080718	0.02413017322261	16.5124916910833	16.9438984816752	14.9566698301368	14.4020587201786	12.3055490611383	11.005288880855	12.9246072184453	12.5747608345984	9.99635797411264	10.1267144164345
FUCA2	1107.03968471221	-2.14227895067291	5.82600256312748e-34	1.44575125577103e-31	13.7690483791826	13.6456422586412	10.6941064416938	12.3729722694448	2.65497823639486	2.93212039471522	12.988281136591	15.0668831282827	3.51274492822358	3.92380500144578
FURIN	2267.46685933236	-1.52433320802537	1.88851442594316e-08	3.34745831697108e-07	10.7072138107971	10.5426536476626	19.0745638103534	14.9699697165459	4.95424262188546	4.41819413668856	15.8325481638754	11.887061259829	6.34391436254295	7.53969211568548
FUT10	166.549672160525	-2.01159070638787	1.99943978909414e-18	1.25814748728749e-16	1.21627682837696	1.49120795160604	1.27257486752558	1.43183260065221	0.30077911268213	0.352061514347551	0.961070643808634	1.23406406934001	0.660752954326448	0.563735841200105
FUT8	4488.62406011435	-1.64446565697726	4.48635841054364e-19	3.04019803212955e-17	24.4013169583146	25.0279177176405	18.3312986292362	20.7826541417602	6.62488241656082	7.22378436186725	28.1306173098799	31.5297460932649	10.5794227251492	10.6287495910713
FXYD6	168.516281675546	-0.527527866139747	0.00814681464939515	0.0304947370528347	1.85129371407339	1.65943511637641	1.67049814529931	1.51448256421426	1.10349970281704	1.16693426641883	2.28712223568813	2.32314735189614	3.10962917547572	2.20960960634042
FYB	8.70804051439504	-6.02978556429718	0.00379236564437947	0.0162218233280704	0.10118710513198	0.116878240363979	0.00419736678381432	0.00388504850621985	0	0	0.0336183323149698	0.0472760634314049	0.00819145770216036	0.0153928800001291
FYCO1	2050.74553413115	-0.806052527443289	8.28549179751163e-13	2.879330966082e-11	5.85373537951613	5.89762324729155	6.40517530616403	6.08607352437178	3.20236678416016	3.56649094423243	5.0836424601224	5.18512801012634	3.06929727242989	3.17056402920715
FZD2	377.713182177763	-1.26882403848425	2.17396095711049e-08	3.81124558242086e-07	2.86613714906912	2.63872018176433	2.9168940469681	2.16791200038514	1.25075645694168	0.902032264370172	4.01437962566433	2.63525273488619	2.03153298826744	2.7107120982474
FZD3	399.585539798428	-1.48246000916558	2.95012564364463e-19	2.05742069489389e-17	0.812022613121275	0.870928859586466	0.738896082506824	0.758980168094993	0.279629853084063	0.276410946689116	0.664249727641529	0.728664012966437	0.39274198543537	0.436935091890225
FZD4	457.630020126781	-0.591643903574495	4.12827615421623e-05	0.000338464856031344	1.46830440548408	1.58665809144228	1.46457049096603	1.49815225784738	0.90507761053388	1.04245022646016	1.63232497547386	1.83907241055739	1.49468677860983	1.63970534228046
GABARAPL1	1052.38484304847	-1.212240480835	2.44883849068442e-16	1.20519791528963e-14	13.5206381761485	13.8430341833373	16.0587701011876	16.6602595438453	6.07795836704345	6.57328231805344	12.2876775260747	12.6258352219503	7.29386786539	6.95477031277392
GABRA2	226.551769204919	-1.04533446236182	0.000449158641584129	0.00267717391950973	0.429022157002854	0.547714084593579	0.692809634708072	0.829388553439397	0.319913685026579	0.270436513680819	0.558204442097637	0.539660398162821	0.742143992715614	0.691952253660015
GABRB3	786.090606368822	-0.382848825899271	0.00260282838958919	0.0117950703179455	2.39364782071045	2.5909312332688	2.27742483423603	2.49701144807234	1.88197364191159	1.77396412377939	2.38369602519426	3.09185918043651	2.26516846316968	2.21307760690725
GALNS	834.11753846266	-0.935859913241703	0.00393661008333149	0.0167211024730515	6.00791670591995	5.7210407409518	11.6137499094613	10.5078586894462	4.43459230556089	4.18387017218032	10.2918667542553	8.50656509964118	7.04002352912204	7.77189160618265
GALNT1	1147.90822788616	-1.34287259822951	2.58090521120933e-17	1.42548491900618e-15	8.56048992092603	8.90894635625384	7.08349827576918	7.76484845159949	3.10825268984965	3.11904448443543	8.73318179000718	10.1382652933728	5.34322404343778	4.61639342786571
GALNT14	575.138843041618	-0.970987597622673	0.00567638961035494	0.0226785280147038	2.84334644363008	2.93448542309174	5.86568065950549	5.78257464263951	2.24232360927974	2.08561798184706	2.6693467462792	2.87703171601499	1.74429264694225	2.12591875043047
GALNT15	19.1819575348708	-3.33070805327635	0.000331198207641462	0.00206416031851253	0.173891652888367	0.130993773175899	0.0577059337245945	0.0467356244446186	0.0126703873970743	0.00750056875463702	0.0320964666066202	0.0718702836662571	0.0140771506165327	0.0264529096117878
GALNT16	795.007064698983	-3.0370060045399	9.87530495923397e-15	4.18252399222941e-13	7.7447536100625	7.37665892539642	3.75766704326824	3.54033317424491	0.57395766943247	0.764480979196656	6.74372684895876	6.87352709566124	1.33632064756971	1.3275218852931
GALNT18	212.224470257169	-0.54197972094339	0.0073480678424605	0.028047141966272	2.04142182631958	2.26258452165996	2.10760884620531	1.71455763946961	1.4075734036851	1.31836140038512	2.36651523565487	2.04716560943091	1.76736806875677	1.77126859630909
GALNT2	4688.42613524353	-0.736641443333725	0.000900327948891451	0.00485548764356244	27.0110205675557	25.0293202642537	19.2897061412019	18.1562630032256	14.0143903435926	12.2788524720785	32.9703431570471	33.7941152905838	19.994659073395	20.7311205340809
GALNT5	121.816832881581	-2.41908087229106	8.07197550081336e-08	1.27437398162035e-06	0.215007497901368	0.216635669243615	0.456191984799336	0.487768762332091	0.0575662346047827	0.067474133536194	0.517974180222484	0.499169819021012	0.118961280739551	0.177874254542803
GALNT6	343.663600457417	-0.808422741194048	1.79841584579483e-08	3.21036360557843e-07	1.86946854518024	1.90781804292165	1.914810868147	1.96737481116564	1.01922801392733	1.11462600238571	2.18509904262596	2.07176808225863	1.3856883696764	1.26555128401062
GALNT7	2422.05799508023	-0.596732607655353	5.44804860627407e-07	7.1848179935586e-06	13.2202082227743	13.8056467554858	12.6483540321632	15.0578526694966	8.84417849603079	8.82810673080745	13.6562916369917	15.9568201477948	11.3569635134847	10.2431199815672
GALT	370.848211553479	-0.486397071680039	0.000613322327523474	0.00348584712536648	6.06498635069842	6.33386748256243	6.69063850279605	6.09731679266092	4.33165224334459	4.44399356366819	5.18042682145905	5.26053557151566	4.44349266940567	5.1522799605272
GAP43	17.7527757146422	-3.55630808278913	3.09516950893259e-05	0.000265113230811295	0.245714348500572	0.202544348552728	0.236185669329537	0.364352552874193	0.0345725732160662	0.0102330715827878	0.350315237240697	0.43484402845361	0.0768221689063822	0.0842096861984249
GAREM1	206.072537323273	-2.3258378331729	2.36615347709072e-21	1.9300582459658e-19	0.861330094345499	0.986754605416065	0.732655531589379	0.866058303455457	0.144716458242496	0.189695000970798	0.620591134075598	0.815777076007898	0.304341114789274	0.302135307252783
GAS1	29.117196127992	-1.75489718324702	0.00421966046628037	0.0177394888464313	0.170201198722388	0.186147339555157	0.490550174358294	0.318512157431252	0.0685909420524313	0.0989727630595517	0.188957165094399	0.266427442011181	0.171464473174358	0.14320240837461
GAS6	1707.78937680316	-0.786820519812049	0.00376108191765278	0.0161193145967221	13.6919795968226	13.0629660438073	23.1314747517881	17.8494806500481	10.9326250223889	8.22146365548703	13.556439628432	10.1267651864084	13.1586526340619	15.1566615315828
GAS7	139.785392763576	-0.817811646700801	0.0090338331753518	0.0332290410681677	0.261098462346647	0.361501097456673	0.496878661941239	0.47286196457627	0.226734174773475	0.213460305283498	0.512772152464915	0.578039889585021	0.450702751648372	0.467666540283328
GATA2	11.6782573657132	-1.84481151839041	0.0131311785858953	0.0448021370071434	0.0663065873560119	0.0799187302659761	0.121021101907607	0.0865579311318021	0.0128835802420481	0.0343204823754286	0.0930140935436644	0.0953211889590127	0.0214710206401472	0.0537960163235118
GATSL2	1286.42658655935	-0.874721385947759	1.55235933131915e-06	1.85219453066743e-05	3.53818313250205	3.52599851093475	4.71583166400851	4.61915688719279	2.11792451693693	2.24437601229941	5.07532296771022	5.24421849233304	2.66743374991983	2.9203811384252
GBAS	1065.91814452727	-1.23759330191025	7.26238958901927e-16	3.4304568946094e-14	12.7297587172188	14.197604969997	13.4731117212081	16.4680808643694	5.66244923716074	6.10242381366537	10.9695168185034	13.3203085179562	8.65031422275488	7.75497493395726
GBF1	3813.87507320612	-0.546828015558794	0.00496350417106521	0.0202622752525482	15.5238841491063	16.7767698512951	12.6194907767675	12.1090307888403	9.11517703347964	9.97953293344781	16.7555995559329	17.8837351913965	12.5241130195862	12.1995999551831
GBP2	26.4109254290197	-2.93923359647966	1.4861099485965e-05	0.000138538471874718	0.302006286069735	0.175935965652486	0.120264919716686	0.176250697648823	0.0234723117284941	0.0260532219387531	0.147162920813747	0.178005168984882	0.0586763710233646	0.0367536674930479
GCAT	361.519198753913	-0.702350521197762	0.000879757485302789	0.00476204213012284	5.17275235140763	5.38342174787822	4.60501825695864	4.37756650794224	3.4316648011057	2.44716917099377	4.47071157192029	3.82316099847738	3.10239822332698	3.77590710967102
GCC1	401.850583335452	-0.70907277337708	4.2039539439618e-06	4.497201542915e-05	2.13993025557984	2.37210215759042	2.52055227572887	2.61593140720885	1.49049179475938	1.39124205152942	1.80609039180508	1.97976480627089	1.40823290456075	1.18224297102637
GCSH	242.07523059533	-1.21840041304128	2.44430233519504e-11	7.03695471303945e-10	3.88299406746655	4.43332441461576	3.87725343253065	4.58563036116721	1.81299952651916	1.70787170249846	3.85784085578227	4.01246425888013	2.18069066977558	2.07359508173391
GDE1	1184.39386612861	-0.640736193493618	1.50231994661001e-05	0.00013968007989088	9.95828378480031	10.6702032266288	8.78566922523527	9.44768854048918	5.75721724481377	6.41729421402048	9.83656091001471	10.0571451954897	7.11140193366371	6.62867450834763
GDF11	640.986879479927	-1.09141863780421	6.56414527321583e-12	2.02901185208403e-10	3.27335095317212	3.7741644208537	3.53159494190154	3.57955476466812	1.43469748207311	1.80439930066411	3.23212094586038	3.44887677548635	1.71878481588564	1.69486337466993
GDPD5	1403.5221584108	-0.841609289399765	0.000442322534550428	0.00264404009282159	8.93034953066806	9.09834709175453	14.469137915635	12.341885983219	6.54681524868085	5.65732170664611	13.5093431321074	10.7896678569069	8.21791476852258	9.85646746715262
GEM	400.689924714152	-2.07691678752747	6.45216707103585e-13	2.29195023436655e-11	4.10764123383413	3.97318975605102	6.59202894615962	6.62827894287349	1.17735739333333	1.28215746189836	3.3172911228549	3.70622580884144	1.58264929098797	1.44932579478999
GEMIN2	193.468436479082	-0.773801093855028	0.000196677470768402	0.00131658828171295	3.38437520553303	3.04355694254275	3.91563050665998	3.92042274478937	2.23021504925814	1.85360909889015	3.38973169221131	3.55092821780808	2.09624465750947	2.21634441202742
GFOD2	975.867811014497	-0.550240340139224	0.00169436078439151	0.00827543053008385	3.67472630266265	3.94995041293156	3.08639966403594	3.09012232468011	2.36563779054143	2.242748188561	3.07920720428731	2.93200481322829	2.11646427840057	2.13895991663766
GFPT1	3514.72462876085	-0.400343160259702	0.00729309346258347	0.0279012192277101	8.64413862288769	8.49708526875163	9.76396930415467	11.0567833202134	7.25763177415457	6.77849573157629	8.48600925741395	9.7808433449499	9.23734721942367	8.24215176119978
GFPT2	985.358964496917	-1.87852838280066	4.02725113202875e-28	6.27930422081544e-26	8.06336000037949	8.29921433178256	9.73357822210944	10.2547632671701	2.19499885042019	2.62429817136759	8.23328018227787	8.46802254531065	3.06362239511656	2.89689721655194
GFRA1	65.9688852292237	-4.90613727905302	1.73349157117354e-10	4.35076752030009e-09	0.124081547387566	0.127604845689933	0.296839209178136	0.328507771285593	0.00755668959553328	0.00671007145549103	0.135911830978507	0.178909929894065	0.0377806095577409	0.03681221270756
GGA2	1388.7269283088	-0.35415719649163	0.000608201636335458	0.00346120950600595	5.29169099991193	5.37198014569803	5.54645514001167	5.42894453771319	3.99040695618121	4.27507680825047	4.93288193281403	5.42117917471381	4.63415296813303	4.28842424047796
GGH	761.546572956191	-1.31889513645133	2.3465326042849e-09	4.95132430597553e-08	15.1027664418493	16.4150679403791	10.9217931241056	12.5240084947406	5.65544270067426	5.12284572829482	15.9565303422842	19.0937285832392	10.129198629986	8.27867327878258
GGPS1	524.780453069713	-0.405387384367416	0.0149373559636709	0.0495379263213766	3.63865334296458	4.12872165860095	4.00303817372017	4.86062749873037	2.94817453136003	3.17625718533556	3.69897021266452	4.74316823618648	3.79722484866528	3.41004050929098
GGT8P	54.4022740973568	-4.61924458750679	2.25054982940972e-10	5.59272742515795e-09	0.911444828060147	0.908255135027579	0.508471107495137	0.439775291476411	0.0292836932554764	0.0260028775485333	0.593448678868299	0.48387399358284	0.0488024889429433	0.0509481193240988
GHDC	309.385779804135	-0.938365417462002	0.0109548210496525	0.0387109891844821	2.26441573198606	2.08651463682312	4.78638566544767	3.42474152243617	1.85558114990678	1.34193311732123	2.60952376761774	2.30700590549905	1.53026123909139	1.55760158032076
GHITM	4103.12549625846	-0.537146210995501	3.69079601820572e-05	0.00030833634445124	41.8923572338624	43.2059452546586	36.3045695465593	39.8245820526492	26.5933720170378	27.7020153551224	37.6055754313375	43.2407350508758	24.8984758737192	22.2827976180228
GHR	220.200099712808	-0.562556412200407	0.00347988688230333	0.0150718109585306	0.911228696654974	0.946726238093536	0.751644327988931	0.854825774547292	0.599955803086641	0.546758861661883	1.0738590541156	1.2265290672434	0.907759660845918	0.960030764038656
GID4	349.505053769176	-0.504679914796228	0.00218758361694665	0.0102471091290088	1.78185747710971	2.03765065075752	2.05979724835966	2.03333175384002	1.23182492281189	1.48555569994664	2.04643036272791	1.95841797402737	1.46566605379731	1.3098096937539
GID8	2574.14889443759	-0.370623165539951	0.000830031154133603	0.00453326686443892	13.5222644577973	13.30118821237	13.9471719104283	13.5068050953895	10.954098945351	9.56149361003497	7.13005061515436	7.05096885159927	6.62216813708409	5.96898821101008
GINM1	704.755531106424	-0.49444559547806	0.000289903972108393	0.00184065516561361	15.0299771445	16.0262396612026	13.7601756753272	15.8987815497637	10.8225559221727	10.2312999419006	15.3859463024572	18.230620043166	13.5180694079395	13.5798559781121
GIPC1	1218.36217804135	-0.752513945131837	0.00879934441997565	0.0325090478791258	11.7442001667851	11.9671248531147	21.578097522487	17.3528426636401	10.1423304134867	7.98814812155908	16.8263285138414	13.0904500627761	9.15731306913559	12.1872718717158
GIPR	30.2035867866976	-1.35616933664514	0.0149818250209009	0.0496547733339451	0.211387347381165	0.144812706843558	0.365133900876939	0.273868160904706	0.132698134472369	0.0589156106694041	0.184882088416662	0.179994459151366	0.0552867357255721	0.0384782999091096
GIT1	2366.85571088876	-0.90530022052002	1.33826551547991e-05	0.000126090374958506	13.8301483825042	13.133948989819	20.0282725593485	17.4217498811388	8.75080867209581	8.02808415411706	14.4325219295864	12.1663807960957	8.70501417134394	9.1483201860129
GJB3	128.271884330096	-1.28086867323003	6.58684678527308e-07	8.57750580264053e-06	1.4780037957837	1.68397916361746	1.51418579050325	1.1733639355826	0.608234261444104	0.567552602819517	3.61950707620478	3.48568351499719	0.841842934265772	1.08691054153973
GJC1	2600.84823891334	-1.02671714694881	2.36190884832658e-21	1.9300582459658e-19	8.34343715055529	8.11867168740845	8.77167836546043	9.36429868944964	4.20862632477363	4.08410813646779	9.52205029094361	10.4107539647717	5.35213113388922	4.61672072396812
GLG1	4988.44118083838	-0.32386857672105	0.000866426946637002	0.00470288859297515	12.5079880847847	12.4595513392919	11.6844755981252	12.2283634733292	9.57492995379285	9.50594451543157	11.5522443961028	12.5241599178201	10.5580911679562	9.83423725040671
GLI2	1069.61240691528	-0.949849699238665	1.53081691827253e-11	4.533019039167e-10	4.02154357123715	3.83665002643294	4.39868040707218	3.99210687493978	2.24236344478129	1.87027108506265	7.64394161510427	6.26780823715967	3.18778521068109	3.74673478084986
GLIPR1	95.301297501821	-1.62198210739643	1.9299739749162e-06	2.26091831542876e-05	0.739179406173913	0.827681490338416	0.455767210041418	0.691645032927243	0.19859245879117	0.231450235379522	0.598970014797877	0.624459916980732	0.263735795121911	0.20730811921341
GLIPR2	736.519810918614	-1.63017852224006	1.27288369823586e-12	4.32118263568741e-11	8.62294408980722	8.07477972200965	5.9511393209029	6.06587616050047	2.33715280556326	2.20360032322965	6.8203540279274	7.45747810930046	3.10180614265748	2.7058755108534
GLIS2	364.779069606855	-1.00519457292407	0.00010054542016198	0.000732028825551206	1.1628038469223	0.995645984895974	1.22083873926841	0.844818532869313	0.623941210961392	0.407097187415681	1.09058644017871	0.726569712449675	0.567382170062319	0.781589067771156
GLMN	493.323569688	-1.14770109655997	3.05192627312013e-14	1.23613537945066e-12	6.25524150373048	6.56303730247881	5.93044548254509	6.89447552635061	3.03086225194181	2.62772386187304	5.52253352393019	6.38298264369503	4.2854445433293	3.89879480211932
GLO1	3369.54668021324	-0.363801009863048	0.00634480786451162	0.0248696706929544	39.2525089586011	40.9588440335106	33.8211875716062	39.4632992456608	28.560617897086	29.7174000445572	40.3475488882189	47.9788163021191	31.5999693800642	30.2717887778492
GLP2R	505.818530617986	-1.90524481930086	0.000483335432646383	0.00284907560648934	4.83001367603555	4.80745619820021	1.47153364574256	1.44585737524775	0.699888593494544	0.94633870646125	3.79975209590326	4.39757728871608	1.78051713540751	1.6383257383212
GLYATL1	10.5378674170554	-2.37094876117007	0.00899149722775663	0.0331078766260907	0.124102782021074	0.153979371786002	0.127184338725774	0.102024682905558	0.0496455733323801	0	0.0830026192741472	0.132231801686139	0.0744627656844418	0.031094626142767
GLYR1	1964.34492798119	-0.358076349274036	0.00137695413567731	0.00694547807514988	10.6341028266743	10.5086041878271	11.9455444295516	11.1772328645213	8.22306507445073	8.64027691105414	10.3677379099734	10.4972240291453	8.738549587618	8.06352704906618
GM2A	827.440125245722	-1.77752321546573	2.30842058744792e-43	9.68382436434404e-41	6.216247701486	5.91350930105266	6.40032423882698	6.82829088543217	1.82114716656807	1.79225256543573	6.14052837242944	6.84403552094774	3.16649815188037	3.02661668247658
GNA12	5971.91097200085	-0.440901070307093	2.16749699800695e-05	0.000193069411566655	24.567885494475	25.1561251359935	28.1358349278852	26.9126261119998	18.9256140024867	18.7607652734907	21.2136232743658	21.5007357237533	17.4816214294093	17.935876028814
GNA13	4804.45078648071	-0.371117394832406	0.0145828407463664	0.048683489645405	18.2003974344065	18.778681989676	15.0197789500784	17.0368178640052	13.843100407144	12.2523893030395	19.9533796978083	22.0091854108699	16.5137611045068	15.2809518968785
GNAL	219.859001067283	-1.22189920465629	0.00482177658439178	0.0197575043635551	1.02008019780733	1.17703897498687	0.51586873137703	0.482730971627322	0.27881443303284	0.39199738359407	0.751693536030182	0.984766400081664	0.569756532102666	0.641004757130633
GNAO1	302.319925449928	-0.550923419211972	0.00199098096733931	0.00949623542597489	0.915762823307079	0.9934749845012	0.917287546502483	0.853871681340078	0.682450871824332	0.546208116199331	1.44193872483827	1.40834740729744	0.759921830855585	0.84657601984807
GNAQ	87.9359090334592	-3.19727743936333	9.12041314761552e-07	1.15109283128824e-05	0.666088430097327	0.620471567255479	0.166480549830105	0.238693141764689	0.053516722720713	0.0373378856553746	0.647820852874969	0.786247276976188	0.0605203181499593	0.111730840145979
GNB3	282.575707249205	-0.79704736582343	7.40985282614921e-06	7.44747272925972e-05	4.06002188085728	4.5209055599708	4.18899631248244	3.64466281416708	2.27051877370901	2.33971787902594	3.73857231160699	3.37012746975607	1.9737080586023	2.0043991434619
GNB4	2256.44981422645	-0.719319865462763	4.20647490931604e-06	4.497201542915e-05	7.57397884057169	8.14665858232796	8.87751432943318	10.3069714343572	5.23186800677447	5.11128871548587	7.19232932956774	7.91479058078351	6.26746040171481	5.68986187117405
GNG12	4126.39586862153	-0.906364624049307	1.26942282233325e-11	3.78442651551429e-10	21.8541467442795	23.1290497038931	23.1147684545033	27.6368146381852	12.6816391072403	12.2472668601373	33.2840315032085	39.3170523304692	21.1665548471233	19.7654482687618
GNG7	174.689466267154	-1.37806475632941	4.82234915385276e-07	6.44162014721242e-06	0.999252452128237	0.832445992339455	1.31177795164521	1.33152580380331	0.388315841982182	0.451296291169692	1.41909847941296	1.23370672315807	0.699487016507217	0.745143243058535
GNGT2	51.2436147945359	-2.9147652776633	1.40794242370263e-06	1.69559381840168e-05	0.83891762960682	0.821551115414862	1.7573669284035	1.8359694521469	0.0815021782034772	0.253298618943359	0.960040379570892	1.1155622978104	0.10187006935653	0.14888838635419
GNPAT	1413.91927445888	-0.463564421527707	0.00249542666872189	0.0114110881069844	13.5698056878566	13.4225197305606	10.970883093011	12.1211121479867	8.65831395554719	9.09417653534703	10.1414954034774	12.1492901821591	9.95133737221629	9.25552431589853
GNPTAB	858.50319057767	-1.5668640030887	3.7683568595401e-05	0.000314071331637829	5.61091356000796	5.76604885189267	2.52292161569546	2.92410073490867	1.33078001541743	1.45320522058091	5.85199426007156	6.72012350448308	1.47135603431176	1.26779915485255
GNS	4638.28918393399	-1.38245505450598	7.51544919295885e-14	2.93602437540448e-12	20.6463632600413	21.6019486331041	27.202358988158	28.967917925789	8.64812333666391	9.75752909244759	27.3775593384242	29.6903457794121	17.3201632091997	17.2211717235298
GOLGA2P7	77.4352336052879	-0.972485855095671	0.00134594926442752	0.00681640703936433	0.547133778844436	0.657321237173714	0.579954520973859	0.599618340144269	0.216748194417769	0.37209838837627	0.62593274391839	0.748367904258661	0.451524815756374	0.42235322946719
GOLGA6L9	95.1641509948274	-1.00559181184771	0.000728439631494419	0.00404161939168696	0.317913502080159	0.315722928569328	0.207702288342627	0.256330061718893	0.137827886624193	0.129585450395678	0.336821150527547	0.347911715403811	0.24771125127749	0.299037976159441
GOPC	1049.02633999074	-0.469326883592626	1.97139559492016e-05	0.000177576784186597	5.30918640349291	5.19018637869834	5.30282002556709	5.76563700873268	3.84114463915858	3.76909658834024	6.03732386469695	7.04473235005632	4.47139225254282	4.00425130709216
GP6	442.738772764319	-0.635955850536504	0.00759061865991649	0.0288017069475683	0.599478098738236	0.506666880443805	0.409360698780279	0.394124626435616	0.287838286239134	0.313549261313382	0.567597258263228	0.627009824694274	0.248763472543849	0.261375993343763
GPAM	498.06582149574	-0.492078827192613	0.00440337162417874	0.0183758893051647	1.63839811841366	1.77009497710495	1.87053971642537	2.17844834008745	1.20342362156324	1.38209752155567	1.60118251460274	1.81725735119301	1.31594799682315	1.244349782932
GPATCH4	593.676644509109	-0.340371502030929	0.00840825574670935	0.031333557106868	6.25392655203414	5.97905830513004	6.89866739090081	6.43870981882884	4.96189421106761	4.90553033020933	4.28385954566552	4.46196937377178	3.18767440538687	3.05376643937596
GPC2	65.6114648995802	-1.45122139455357	7.86826474247906e-06	7.86781818942897e-05	0.811881881991162	0.62887291093766	0.711230922680621	0.61392912981017	0.290101828823454	0.207742016694187	0.711176436852979	0.602366636550173	0.382094670280412	0.595898327477017
GPC6	1989.97664124731	-0.560156666107713	2.49366518762425e-05	0.000218913238369465	7.17648436211283	7.18291437819755	6.19535651678142	6.51424605671285	4.5509877576327	4.42309606142787	7.70844460344904	8.03511452143004	7.40233843410714	6.88194742164038
GPER1	32.1200078793055	-2.3289679705216	5.8013678038654e-05	0.000455297547155031	0.214016543244115	0.203340701871846	0.396376057861391	0.416629223503968	0.078672608746056	0.0419150861976357	0.890837326525062	0.640278797478741	0.0458889075135139	0.0821253266716817
GPI	6539.05065400627	-0.590145592604357	3.28034230213513e-07	4.51533992354054e-06	28.4574893955941	29.5323430443928	27.6001419478559	26.9762807771457	17.2989564789193	19.2335032319591	29.2480755460137	30.2519555031033	18.9188647088159	19.0673702226799
GPR1	24.8885125869749	-1.48625744403196	0.0089966637230412	0.0331199787163107	0.390175840939776	0.26486776164125	0.156268757317404	0.216961633371878	0.0823479555244566	0.0974960721970667	0.848318090724907	1.01544043936337	0.304969515809487	0.372501887369162
GPR137C	160.728058452087	-1.17994759594501	6.48505069662948e-06	6.61610354510219e-05	1.36636982754249	1.10896830684232	0.900012383804006	1.00063880891977	0.486434682410413	0.459624937408797	1.90995687653829	2.38085263509168	1.3251231372702	1.19784689433103
GPR161	718.314296714137	-1.41568766120926	7.0097220548616e-12	2.15839124949049e-10	1.78171991895467	1.84666893424189	2.52701786503103	2.46963328175326	0.807785607334463	0.769364964080297	1.84569716627181	1.90538829446677	1.32399354939391	1.20502189329653
GPR176	2715.32061683135	-0.58418652432467	0.00074533121094226	0.00412566465774165	11.5252410745979	12.428990592444	15.6830481031704	15.6151377326588	8.98221211542402	8.99427452698417	9.72621148800473	10.441524534609	7.27741326013258	7.46934830663444
GPR180	726.219245422776	-0.397024570685312	0.00891818653818561	0.03289293041999	1.71942666845612	1.89527006182048	1.87342029371026	2.1961406573479	1.50535671059825	1.34398106659637	1.89352589394039	2.04155968898108	1.70512322099848	1.68550041431048
GPR39	349.208273657668	-1.67973240602027	3.39369953738394e-22	3.05069347699835e-20	3.45038702499579	3.11015406039221	3.8167023676601	3.48515293025404	1.11736857214444	0.999815711426554	3.55990319247751	3.60569545590318	1.66876486650627	1.6778311953916
GPRC5A	5260.64457276659	-1.57926867225317	7.56786207402285e-09	1.45565678910708e-07	37.6424194203621	39.4614078111905	65.2324770658725	62.8591350309849	15.2744401388635	18.1698002666105	36.0258734349945	39.0691094895802	14.442729428554	14.4177852348877
GPRC5B	13.6191131064259	-1.92152222047842	0.0131611311038953	0.0448852863108691	0.11675915208133	0.0522402179479989	0.147941246879829	0.148344314174083	0.0144369741086838	0.0448683174371238	0.263315245902147	0.283057675317228	0.0842093557348316	0.0527470020129461
GPX1	1160.56361084848	-2.28362538708601	3.04953160416984e-29	5.31977201325429e-27	23.5490925171012	20.8431215476357	29.5380734985275	21.3494798880586	5.15458531239334	4.41147000334571	28.6191870381465	18.8552377527381	5.02986435689983	8.53140865584778
GPX3	340.436737134924	-1.10443396333712	1.33140776078698e-05	0.000125578551056241	4.05873806330587	3.81407073681703	5.76424102756384	6.1171459420092	2.2856778173409	2.19576669398254	5.55641679654729	5.95344407540016	2.84017572089665	3.19527281189009
GPX4	1685.47482156849	-1.79302235398507	4.27037542761573e-52	3.5828449837696e-49	32.2741119444249	33.3940101121288	35.8474180519791	34.4231358436066	10.1619216201955	9.00807882550173	31.3238751440361	27.6188219287998	14.7031498654658	16.0020525861356
GRAMD1A	1049.64775665452	-1.18428158994703	2.18633197926875e-09	4.64668071685599e-08	8.12422186827543	8.01937280273552	11.4832046717811	9.48677501535234	4.25370015119396	3.71979646294484	8.60602324062634	7.20205526001196	5.72363518290417	6.20979558133038
GRAMD1B	268.516933724686	-1.32563449805321	0.000200952520051225	0.00134214649385236	0.609379334631324	0.600123414373392	1.1738769085289	1.07968302108139	0.277239424665473	0.394911734393589	0.590370464246489	0.506389842736354	0.380213006995689	0.45822723956554
GRB14	87.3950381635718	-1.10967416954741	0.00571298964854066	0.0227937419876898	0.935476218163051	1.0258786713262	0.567183385675958	0.493355001297768	0.344097892629697	0.341075368082147	0.796660783409488	1.04202732875484	0.666806284566948	0.509561903132987
GRIN2A	41.4338023991178	-2.97678617128171	1.86080491489601e-05	0.000168389942452762	0.0542476997100028	0.0423786883398045	0.107812550482203	0.138669802413209	0.00491890005724935	0.0160152967752259	0.0286591407907625	0.0642947478624944	0.0122963263322563	0.0171159221532407
GRIP1	346.109770126534	-1.42406308933158	1.75512721227286e-17	9.97535043646307e-16	1.95533296327578	1.96183109165957	1.69818740968197	1.84453119860393	0.699614053412654	0.659527530549162	2.38890068184439	2.52783127556669	1.21784392862163	1.09047501942417
GRK2	922.932706973011	-0.750780641839293	0.000949594271425841	0.00507304471444872	5.84398448934513	5.88118934820645	8.44697518411767	6.59420992253232	4.51285180835005	3.25706426826558	6.67722813171258	5.78187776304171	4.26494643352764	4.82849705920426
GRK3	2178.13136835416	-0.486436356204831	0.00368352208556611	0.0158524610712236	4.91989752327258	5.18797740430154	6.11221385433444	6.76434698207172	3.88807243716798	4.11348005694324	5.50660734199856	6.19906483131614	4.52949616316161	4.32984856749297
GSDMA	32.5406978607095	-1.06367304190008	0.0137974504395533	0.0466239507661084	0.486041117430476	0.417025093421166	0.373160260368617	0.292256544029124	0.156865329120833	0.208936245292928	0.613084041810522	0.654905902590022	0.168057369502224	0.17544611146173
GSTA4	322.296091727873	-1.46558711499422	1.11716443321785e-08	2.06108064386024e-07	7.52429663690979	7.77645201963658	4.92549567480491	6.07390105854033	2.47712530061761	2.18354365024999	6.41701234200443	7.15705037488151	4.23369779917104	4.22794164978938
GSTM4	387.914066839062	-0.374834468803047	0.0094320261043321	0.0344206437307844	4.3056342348952	4.62911631261005	4.94688030141193	5.03867079693062	3.50359454893221	3.61647532628052	4.48889595755239	4.46380625065994	4.44767096413341	3.86861268873354
GTF2IRD1	1284.19039484099	-0.791117235958626	2.02742687657728e-06	2.36407902967671e-05	8.46643564138478	7.83503242409112	10.6491025149814	9.62863310018041	5.31796516407585	5.00280922084221	8.74074734928104	7.26931433827805	5.1355043040163	6.46940922741612
GTF3C1	2552.4563031705	-0.530444138716024	3.58554108912084e-07	4.90478637028107e-06	8.58615727178318	9.00848005771043	8.4780253415869	8.45662941688314	6.02504881038889	5.65600454948873	8.36416938944766	8.50401006197669	6.45045713076922	6.55657777926985
GTF3C2	1460.18447032847	-0.941579115474255	9.84165218368612e-12	2.98965637628217e-10	8.72558918603427	9.42628970522802	8.1560367053831	8.04102038928626	4.22264951691251	4.51427591391379	8.43636796396967	8.86284357815257	5.30569387352103	4.6863677244756
GTPBP2	1906.34012427027	-0.342790709252023	0.00218795757666901	0.0102471091290088	13.5498994278925	13.8394534138069	15.3773042965213	14.3319915472629	10.6573756837064	11.324106429285	11.4148542473045	11.5006843440914	8.96517931673423	8.47237815416329
GUCY1A2	751.027973295614	-1.54721779634028	9.93372523677121e-23	9.22427699549698e-21	1.34974755191997	1.23801351643971	1.13492124029289	1.39551138763651	0.451480559879857	0.404881108336309	1.28039690034379	1.45006572637616	0.908125283797641	0.784971078188963
GUF1	1569.07902069299	-0.58831043883355	4.58797179250963e-06	4.85170423175263e-05	8.86090658932717	9.73841573808093	8.20014495118363	9.17311942464909	5.73982504356409	5.94537353172459	7.51066939202086	8.53573912871507	6.23245908946159	5.99770351261108
GYS1	1139.79148106815	-1.67773090576718	4.78853279295122e-35	1.31826811373449e-32	8.18425825981474	8.5153061034244	9.70038958928207	8.88325360960285	2.84153807589459	2.54698832425633	7.2524743023487	7.39295649896918	3.03789423708511	3.19710855054091
H2AFY2	555.744938908612	-0.35446825437368	0.0146180155631713	0.0487700844929966	5.48963595739158	5.46453640211636	6.16702208059517	6.63165121065243	4.60679934760499	4.46614636980444	5.12460228370334	5.09615335692122	4.55267422551072	4.27464775140804
H2AFZ	3678.12886025891	-3.67049701630679	1.01486616723929e-83	2.23511587507364e-80	134.615495615645	135.424581070866	100.029743744819	113.127812599589	9.42223703243578	9.13961331498901	113.244671813061	130.217279742957	10.7314972570817	10.290121316665
HACD2	1696.61262217959	-0.700915079395273	3.18208639564048e-08	5.42741337897287e-07	9.07902264997648	9.31014826137982	8.10546197906421	9.35543811548868	5.20130896597911	5.56986632306188	10.2693285467034	11.5984177740361	7.21918500044005	6.40744428105268
HAGLR	89.0832357141238	-1.16490724905861	7.30725874462529e-06	7.36536566484857e-05	0.512621877747944	0.570212708806155	0.475429250400751	0.46472933557374	0.213331076960711	0.226392435171479	0.458687435954472	0.531254032439462	0.208112244694028	0.255282877032184
HBEGF	719.84504005913	-0.936392637708185	1.36270502052373e-08	2.48032022279004e-07	7.03856516316112	6.98455132081514	8.65807116188816	8.68843317921295	3.81492755036611	4.18189789459923	5.75928352413924	6.17001362809665	3.65012814246533	2.98408190801485
HCG4	136.241313963364	-1.46090204715297	6.25308384309188e-10	1.43641570054023e-08	0.235502606467967	0.254144017506335	0.229002142059606	0.197831682902529	0.0804505371944	0.0820205051816593	0.178887857060521	0.171954153664236	0.0657956505306336	0.0933125370699071
HDAC11	305.207042054957	-0.852705396873311	0.0144876810189132	0.0484637273347696	1.80305705873896	1.63574823665652	3.37099496311043	3.32025625230275	1.37649600479706	1.35574676794969	1.96590282009378	2.01343231000249	1.62820388721941	1.79200410199219
HDAC3	997.639658180801	-1.2333883949756	3.50881921999491e-24	3.70190933156229e-22	13.4183688725286	13.1203408112303	13.9030987712032	14.3367578041751	5.34803046203819	6.02186536757889	13.414930269443	15.2185546567826	9.41132789854753	8.02925596128071
HDAC5	1313.39830898565	-0.922821330985253	9.92350779113819e-09	1.85410693289569e-07	6.20113202793421	6.20696137368087	7.12083314271198	5.72034191985738	3.5685316396056	2.94239131597805	6.32667871688308	5.30067407124529	3.94450903684507	4.79422281046259
HDGF	6365.83303042683	-0.815970082319293	2.02863529559416e-11	5.93729655698895e-10	54.8731040536991	52.9830149436224	49.4622889257014	49.6655913269368	27.3374190597862	30.1175245611986	42.1094062708265	48.1279666647256	33.9996972096496	28.6515256812471
HDGFRP3	801.922614366518	-1.3932754917406	1.23663025890814e-10	3.17149760286791e-09	9.90958524989034	10.3299282053991	6.86500720955495	8.6848535505934	3.23756855178665	3.42327776094569	8.8499070455169	10.3037584105984	5.72757559221084	5.56343415731864
HEATR3	495.926798527914	-0.493216986379088	0.000106182241934812	0.000768937493074172	2.28379841281387	2.25145439906758	2.46047718662115	2.35684174638309	1.61773618816633	1.62774112508904	2.24421649673451	2.35486236908553	1.77873801191884	1.8636029567152
HEATR5A	1081.12887087567	-0.504544927422074	0.00600472452137998	0.0237373213691258	3.42083825600703	3.83225069876153	2.70601180711079	3.22551656906298	2.2413618591435	2.30045398793006	3.54059139215135	3.76721541044957	3.03205140980996	2.6624501066142
HEBP1	1055.57671770364	-0.597309229487167	1.05665122584933e-05	0.000102743586910814	19.0075956310751	20.2119849684316	22.9338631134238	22.9408190650579	13.909851262223	13.545604953428	20.2722903852697	21.6372312825824	17.8125044700605	16.7203629907363
HECA	1173.06546268066	-1.14420879013036	1.19499222274338e-19	8.66443126440973e-18	5.48035142486434	5.29363603089584	5.35966252469829	5.9018890857013	2.60974440480312	2.26373530023477	5.2581812296909	5.70002734443799	2.65627580183913	2.80533161337347
HECTD3	2211.23263824156	-0.419605339389713	0.0115446817027452	0.0404079966759744	12.9181868867205	12.4510062821454	16.8989283986302	15.2241922321853	10.4125322789974	10.5634181494295	12.3267125824683	12.9700031642646	9.67330436705389	9.83697525057865
HECW1	120.093606605348	-1.00019437321287	0.00165295373158145	0.00811236540298987	0.430100151894855	0.612125978705822	0.405695538261517	0.369903881432387	0.180814709576291	0.261298692300834	0.48228660399416	0.46166732067951	0.375191879462213	0.396005227048211
HEG1	3490.40304399702	-2.03159699457513	4.40967399870887e-12	1.39989272402255e-10	13.4520249495153	14.10271436594	7.88106728383332	8.41030429464739	2.55815896494171	2.69482508423686	15.2327211897659	16.6345469091428	4.08012473252271	3.9337690632309
HEPH	22.4400354722269	-1.58706501439697	0.0075258075727495	0.0286067670870846	0.145602719484116	0.0734973369999281	0.186458899437887	0.116394426000899	0.0304673064069543	0.0541077678161731	0.0810383688075548	0.154035048847232	0.0973188062229751	0.08481181379757
HEPHL1	1053.87789120356	-1.98332826292433	5.73874305628897e-06	5.93373907915231e-05	2.83686248509498	2.86441478309487	7.1465843803929	7.60994174700628	1.15713645377446	1.35672886553849	0.984650127756292	1.15456368557873	1.22563051293541	1.1696407430782
HERC3	415.959519665389	-1.19130437017461	6.75890815230761e-06	6.86765875060598e-05	1.22800138666164	1.54584368407612	1.93637906250673	2.24037085979617	0.719074803849994	0.763512705147016	1.38784859718392	1.63265019645536	1.40126625556117	1.40197584577357
HERC6	214.51695335715	-1.11981438115307	9.73510848983577e-07	1.21906806313018e-05	1.59521621777898	1.5856747402374	1.36830595488581	1.24678089563877	0.741933881164464	0.564695044031609	1.22717526434171	1.33773202648624	1.09619249656001	0.839578892452401
HIF1A	7625.67951855696	-0.393695107121841	0.00410400180676864	0.0173318331336186	35.6986174598645	39.1902481239081	41.3122860321757	46.6804843071807	30.0617399969618	30.4315669566491	41.3141146513522	44.1526749584724	43.6494124824765	43.6017691524203
HIF3A	23.1378892767075	-2.56326174617973	0.00936594707736922	0.0342362285386241	0.0223046601553268	0.0352847318643808	0.168390950565673	0.209813278023581	0.0189606646977905	0.0168363955350215	0.0144092754761188	0.0140283451376964	0.0157993669239745	0.0237513534690763
HILS1	19.702408218225	-3.1000664539239	0.00807930639414779	0.0303128831683326	1.13861675419705	0.884185075205113	0.197384274018647	0.0548091828823142	0.0693428923227868	0.0615740208108262	2.21329768001568	2.4797139423284	0.731897765538974	0.579089243398565
HIPK1	3960.13113572998	-0.545391378965025	0.00696915853185177	0.0269216409060943	9.42721598831282	9.31124960869346	12.53977742462	13.7233804732815	7.25239492513575	7.77950310262174	11.2939209699298	11.8836708769783	10.1639018485666	9.92851924764856
HIPK3	3137.89510527628	-0.568668038340002	1.59093895087261e-06	1.89269097740881e-05	9.65949591639604	9.86275740069292	8.6084091818301	9.3001831178375	6.13270488449115	6.1993065176129	7.54733517247061	8.52195632627637	6.42759999015888	6.1085897056398
HIVEP3	425.868462483125	-1.40368717056867	7.19895178027791e-05	0.000548608699899293	0.55444936855789	0.552327224727079	1.11486105999735	1.07535500323745	0.280003143927178	0.326425921259632	0.814607640298198	0.740963375508058	0.293437282082012	0.372985713176348
HLA-A	1360.19609867448	-0.657526189256012	1.69886417898808e-05	0.000155816178915101	2.55619920194443	2.36712937472597	2.85007392545332	2.602316301371	1.78164280111042	1.43335414956077	1.97162134228343	1.83876555661979	1.62254643755135	1.91678779204587
HLA-B	3119.7000225537	-1.00147635517073	6.12132175589913e-14	2.40740107181221e-12	8.76780014866077	8.79682589873515	8.34565051752435	7.49467094794848	4.15904789051894	3.99824506365436	7.41752829859786	7.0766722860371	5.42207466538898	5.7425076884653
HLA-C	2591.22970854974	-0.713246033279823	2.62337326346767e-05	0.000229044665654296	5.66922136039486	5.16642933624916	6.71953535745251	5.70804275523866	3.85870746488059	3.07382102224489	5.8715660878085	4.93079184847714	4.11652283644227	4.90969321074597
HLA-DQB1	24.8069881302695	-1.76090245840949	0.00213742318840245	0.0100720136818569	0.147956879513146	0.0811913902081334	0.171848183021619	0.166820365200577	0.0245413947525652	0.0566589016057515	0.0746015444488286	0.163416022124267	0.0940682792944749	0.0768553411342479
HLA-E	1434.76901513748	-1.04708871392293	0.00162075591282532	0.00798771984001938	1.36424286096172	1.37083453469838	2.82349231971219	2.49409626928559	0.961600173525811	0.935902646466153	1.51989136701776	1.43253720457144	0.946565050914267	0.98342720792496
HLA-F	133.08297186377	-1.18427656419826	9.94622371094e-07	1.24109430285447e-05	0.284906386767156	0.279558825017446	0.378184663827508	0.297874529133238	0.136266374516527	0.130452792422094	0.315523655459943	0.261498799482465	0.159675161399198	0.211147474501244
HLA-H	126.876479901937	-0.911827022045231	0.000864095399861522	0.00469446895492537	0.217177712552341	0.273925027728932	0.279764227189439	0.1867817960068	0.132477145093735	0.116045328598903	0.258494571838713	0.176162621999222	0.167075738873774	0.173798389564364
HLA-L	159.084497953736	-0.94975598676437	6.45762662197522e-06	6.5919422626061e-05	0.139499438156736	0.130170899305961	0.163518396936922	0.156880110772364	0.0804411891900462	0.0690997097943282	0.159474218561414	0.145554640888154	0.0990867742758458	0.07849512129019
HMBS	280.24529309899	-0.937799921871565	3.97323874503947e-08	6.62921339477751e-07	3.91941126598222	4.6520699185597	4.28307542588334	4.15693531394444	2.04923547058004	2.27774142270876	3.59383681325297	3.73208369518578	2.80614311421924	2.5430699560497
HMCN1	413.538611632325	-0.656007214711887	0.000486011200912953	0.00286389008323924	0.597104643849023	0.630412448432716	0.479780780002342	0.521953237616217	0.359469715802455	0.33220061022744	0.640458273452603	0.718090128407689	0.624587180309637	0.553140139508264
HMG20B	989.908475891207	-0.760213433221796	0.000277260828682503	0.0017729892118078	16.3976884215052	15.8573089710951	16.7187346153328	13.4299798940105	10.7304769626829	7.29912592277124	19.927231106874	15.1420717537306	11.1735516729821	15.2281612836126
HMGB1	3023.13905754386	-0.896053670294044	0.00184123693748692	0.00888787769906359	17.1992182000582	18.3279692446079	9.74903621030243	12.0588814677759	7.12904882960935	7.95504913657499	16.9605575751019	19.9048651804031	12.5848224896612	11.0968592184721
HMGB3	555.487103518893	-0.607636664879698	0.000474207589305702	0.00280183216498228	3.9797695212957	3.50885753927589	3.09923056498336	3.22597657249024	2.22340648469396	2.2107825821953	3.57706307124754	3.96821500944231	2.90032630839763	2.33391577791996
HMGN3	451.697901325018	-0.865461266422837	0.000182473009428954	0.00123368839337251	8.80435491888382	8.78227108114422	6.39479394314861	7.18359476117795	4.81639062621501	3.55910406413271	6.02937802131428	7.07814945714965	6.61104410419325	5.7509405287013
HMGN4	970.862659910104	-1.04696180896104	2.67532790720515e-12	8.69679011015636e-11	13.0713213744188	13.2090202594773	11.8994132620391	13.2245906167916	6.75167688643947	5.41541635774484	11.4604348222182	13.2084653492189	7.75111482159339	6.99654368396112
HMGN5	101.76887401705	-0.977416200137588	0.00123189144998167	0.00631794672759528	1.62673467923524	1.0729885217005	1.13949031529307	1.09076117498734	0.672891337213797	0.55699484645353	1.10074122662997	0.995698417651067	0.826795882759611	0.702422631765064
HMOX2	711.02869270294	-1.18926366018784	1.37482458178109e-05	0.00012898314327157	2.43958408130471	2.65628354825638	4.27783642901371	4.06158031092154	1.40299764875119	1.46745951762713	2.82253102879957	2.67149390706253	1.43803627961906	1.45558614135406
HN1	3116.06309949318	-0.714498200522881	4.03451131578888e-07	5.46380129691655e-06	27.4225960572839	26.0757575419747	24.0289816547231	22.6263171620576	15.0088613202514	14.8352993017653	25.7876542356559	23.4539083582138	14.8387100864745	15.2161613525012
HN1L	4326.38329119186	-1.06802523999164	2.11080373434082e-36	6.76186381733653e-34	30.01983483572	30.4925145087945	30.9712754244256	31.3206080989513	14.1610311244677	14.4451738880718	32.3903579946087	34.9144614603947	20.7418395946275	19.270191693542
HNF4G	28.6122019927913	-2.15776095569386	0.000133270183888481	0.000936238983226132	0.246510310938571	0.22008640673188	0.131796027215129	0.130402386461075	0.0372537941415147	0.0425314845240716	0.153689661149409	0.157501736278193	0.0842582041319561	0.0666664416511299
HNRNPA1	10437.4458005811	-0.81009012539595	3.13582790189703e-19	2.17520282691039e-17	124.473328258671	120.631687563962	118.290206348675	126.518996100425	67.3738363777409	69.1159393297149	117.222595689378	127.523893574382	88.6029881197597	79.3652804297058
HNRNPM	3080.85713223057	-0.975997759292962	2.86863922250043e-19	2.01364758809701e-17	30.9470221179693	29.3377434472907	30.5242798933782	29.8016337665278	15.8395896747915	14.1303345658653	34.3576054509106	31.822783662942	20.6181258862664	19.3001371840769
HOMER3	427.200022554727	-0.66624112134392	0.00278347521015825	0.0124788930605034	3.25044953600491	3.54867521613267	5.06501906503297	4.02977499608104	2.57205675438474	2.31640583008791	3.985817737783	3.09487641648674	2.47118560092512	3.26778813991416
HOOK3	2772.10675006846	-0.41137604696529	0.000315767822824311	0.00198201399014661	4.42835510178275	4.50492031031477	4.1941766106528	4.93988383757351	3.34822123566314	3.28621629313358	4.05665529925887	4.50101241288353	4.24652626952347	3.88955443105201
HORMAD1	131.254250848799	-1.20637473240227	6.27937975068518e-06	6.42487757417666e-05	1.85971861252408	2.03395554579622	1.39637414336311	2.06997554143436	0.715398466211765	0.839435359933473	1.89314193275966	2.51416918056635	0.86224587155567	1.18687106719647
HOXB13	140.327814422926	-1.34088127864427	1.89718187567548e-07	2.78321794067662e-06	1.20960537668111	1.55229059441077	1.15258502906126	1.07944844271483	0.479187707816886	0.482235183627344	1.16531740577775	1.27632434670969	0.605594521882887	0.700305058345795
HOXB7	306.513961525516	-0.765919424161212	0.00415453835698582	0.0175074889528183	4.03260826164406	4.88143916494764	6.85134397931138	6.73438744873179	3.42580623499132	3.0262324020173	4.84271065220423	4.28130305303082	2.97295045014501	3.53909656289938
HOXC10	165.281904297396	-0.805498654329298	0.000114132090755668	0.000817104147510812	2.10211174800024	1.90664033552191	2.34642444945964	2.14248228564522	1.052060403941	1.3188595779593	2.7559920231272	2.59155881402266	1.70173456850049	1.84761443199099
HOXC11	111.405894750414	-1.26849119063736	0.00162307282990045	0.00799690161913199	0.980178673767419	1.07064419746108	2.01262191861664	1.81582437224754	0.738000823251417	0.454495067372596	0.82318061589412	1.09204296637147	0.59511724366358	0.646133203422209
HOXC4	59.2913685030678	-1.21922439038785	0.000171673335398767	0.00116919694487471	0.706696916244876	0.769345526141008	0.529555251778927	0.686212838712418	0.289391792171767	0.275324585807999	0.722611038386693	0.672920461663932	0.456446808348705	0.312881391613878
HOXC5	31.8481636395175	-2.11759062701589	1.51308673653427e-05	0.000140532816083275	0.401619761760047	0.414916000994668	0.466471221555516	0.414139025846243	0.144923988138827	0.0494951324372082	0.457487540164817	0.461889229736472	0.213653930903313	0.325843089216526
HOXD-AS2	28.8085405311668	-1.10712308222563	0.00790854705199138	0.0297927497346667	0.978939285993508	0.978080529801375	1.22677749151271	1.19088526602724	0.560621919434323	0.435585775350575	0.665700197935718	1.01103824092682	0.671527889761136	0.658379280699164
HPCAL4	87.1102040136532	-3.02620502803877	1.08409348831285e-17	6.26250595756856e-16	0.472238400772051	0.482944572700998	0.560958739015667	0.619216542097208	0.0583910849260312	0.069132274084481	0.329112131571062	0.388814039395005	0.0729833729887244	0.0609537042268809
HPRT1	755.325413349496	-0.715929795734026	6.30233510055537e-07	8.2496910948503e-06	13.7702548372123	13.5348629535304	12.4379991469065	13.2055269782	8.58494410302669	7.18186614276154	12.7358280468733	13.717655461892	9.98074704257427	8.12099339845681
HRAS	312.52230255953	-1.07897678316674	1.693451482654e-06	2.00247796462287e-05	3.02104230326037	2.84543047577945	3.88954311028831	3.32437482735141	1.7734541714	1.25636924903561	3.01954372755111	3.12613877868488	2.10763554765819	2.21547347080995
HRASLS	134.592380846807	-0.684940743900772	0.0035756505943469	0.0154314553462459	3.32055120091317	3.60807129275114	2.82437770457256	2.74042477021613	1.84759994285822	1.94441837307414	3.46690150119674	4.38782353541148	2.28081622830237	2.2382280469802
HRAT17	96.6312469622973	-1.19601389898883	0.00288740901890065	0.0128565224928002	4.56391362500033	4.82210251038122	2.19649331802221	2.90049368894842	1.50900072515349	1.58356420895283	5.18654839362557	4.46583140894932	2.94347345615981	2.25543793190011
HS1BP3	820.59589494352	-0.934339379474333	0.00514306672666206	0.0208791918564652	6.40228908861926	5.59149528320599	11.8305464016128	11.3330777459677	4.55070786725179	4.40821816238506	7.52246210185698	6.98018462652958	4.96908039102194	5.50880833572661
HS1BP3-IT1	41.0015137189519	-2.90274777412283	1.93980173933972e-05	0.000174909758676697	3.17914826719751	2.63212338130992	1.34586467239614	1.08601350926701	0.404114966925574	0.143535884067904	1.56625942570316	1.37535766175994	0.538779477930094	0.210925214001769
HSD17B12	1013.6353544208	-1.58996641215196	2.99482060559035e-36	9.2571481140169e-34	10.5911290527572	10.6279769049805	10.8287494572118	12.1917661262218	3.65847105617494	3.51930812017178	11.6206928383385	12.4483555001352	4.37427542739904	5.09204131562621
HSD17B3	75.8600716991477	-3.47053294351005	0.0108671639153299	0.0384938803828302	0.39301145566898	0.198951124815565	4.07173818944974	3.70116648816488	0.213817442817764	0.15188982441048	0.828708690848231	0.996635986782566	0.445419541939562	0.602643468576483
HSF2	468.679336383239	-0.578493330466653	0.000923051764513971	0.00495528611790727	4.01648171887147	4.19679984541617	3.3372994142872	4.20499470710175	2.40367862476355	2.7463364993235	3.96634561468717	4.34028926791548	4.04784928392887	3.39527450199035
HSP90AB1	35340.7560296788	-0.431317899266441	0.00714592007407713	0.0274539829448681	301.427161259635	326.089758752366	256.291827663842	267.951739110585	196.713952915668	220.851897061164	231.201086576213	267.994900454129	201.49794153883	182.099496672698
HSPA12A	950.52687290901	-0.971671744803333	2.05479374943797e-11	6.0038824330593e-10	4.15627822638982	4.47907633643225	3.76840732939778	3.86990572001295	1.96890287771444	2.08439273692099	4.22263076068212	4.47145650795273	3.04975846129892	3.09767949623322
HSPA1A	514.242477939379	-1.04863724556628	2.9938736486639e-05	0.000257312486906386	1.15079190689581	0.996934339565718	1.21216047385585	1.05253337468495	0.666814651065336	0.377601605267149	1.06053359026131	0.889217583596203	0.692051037934086	0.71900402302785
HSPA1B	426.65029627176	-0.583428360808066	6.00972575775546e-05	0.00046955812916139	0.814883881151296	0.787783931735372	0.870881158845703	0.812164133493491	0.575337076949829	0.497209851564479	0.897858981669745	0.728910186031912	0.540340104145827	0.650803295007443
HSPA4	6926.52050444811	-0.667040365412488	2.29552203475319e-07	3.28552418605332e-06	51.6324680543979	54.6678899931908	46.0906274582658	48.956949246495	30.0776144068624	31.8916804748805	53.0641997801873	58.9060448672342	37.1316152016593	36.3327248981245
HSPA5	7271.64548646496	-0.702678103358063	1.31163358999984e-05	0.000124045476232996	48.9726090567896	50.6913434212692	40.0499702357295	41.4725532291283	26.9158890565391	27.5230961578568	50.3505178545795	53.4568430794659	31.6142769228754	31.3614446652303
HSPB1	4723.90862118384	-0.748587039846425	0.00811477797224036	0.0304006534324693	168.412480331521	140.709680149657	124.025913468562	90.8038051226598	89.4999769558914	63.3190070520284	157.88930350783	112.036551129551	79.3303227955598	109.032110622453
HSPB11	341.787988120076	-0.902685488233257	5.18857761347677e-08	8.52361855396094e-07	8.30348501623094	9.26921216045715	8.16380550868094	9.94462890177807	4.60666295290032	4.70633491172595	9.26034533973386	11.5992547838616	6.68658902640515	6.9288609625096
HSPB8	1233.65618056869	-0.676033204891055	0.000209390858860703	0.00139059839512504	16.4467873701452	17.1167530671741	13.6934206274686	13.4307776356139	8.57482707042877	9.99087185058061	15.1315184571663	14.973435170053	9.85990665467723	10.5441535550934
HSPE1	765.886429449498	-0.827509139010221	1.65840043414925e-07	2.45954185599964e-06	18.762309158481	20.464617904953	18.3591193506295	23.6495010227394	11.0675767437119	11.2735161830877	25.1359453541646	29.4786728178667	18.9745920545947	15.5371983451461
HSPG2	7531.37269537415	-1.60779829169376	7.58000599473731e-17	3.93959072629135e-15	14.8663977246185	14.8225870239602	16.2275511317824	12.4385739603659	5.42144613649996	3.94190788080229	18.9995617019362	13.6418850129732	7.25594303183935	10.2299390551621
HTATSF1	653.141097480661	-0.677385920939555	6.34922345074521e-06	6.4888032470232e-05	5.65593285393235	5.06477619311836	4.65264911668288	5.1750854969296	3.05698203515356	3.22302886823397	5.26977880787078	5.7545946380136	4.25623749721348	4.16060588104352
HTR3A	66.4681142076483	-2.79044249573887	1.57777632416688e-12	5.26493201808642e-11	0.732312432898485	0.696906803192116	0.94506935182621	0.962223343578045	0.0905485818007511	0.142940299486709	0.863984940710065	0.602944094908291	0.142519467709724	0.189045005080424
HYAL2	657.268127600579	-0.886614787960773	7.10488957774222e-05	0.000542378897184749	6.18367123480908	5.51637959258607	8.52937284810971	7.56113839854363	4.02942648331095	3.31030747964312	6.72001313775275	6.19293824526224	4.25352219418495	4.34262935416821
HYAL3	101.064923734662	-1.29347112199971	4.19446630884908e-08	6.98509469712778e-07	1.29194159365721	1.32467205903871	1.42761379829098	1.42748452622799	0.53692174770182	0.552616765535714	1.43740318531626	1.3903749146257	0.691438182547428	0.662392217096648
IARS	6510.13516298562	-0.79045465784917	0.000617627020147308	0.00350466037615955	39.5259781586328	42.1203608122267	26.9436700216102	29.9518375485742	18.8827222762166	20.3144416814575	35.9024921935254	40.9522170568897	25.4804944180315	23.1184782327544
IBTK	2003.00636224436	-0.526534333543268	0.000820706016733346	0.00449348020783866	7.05713456393423	7.66951653491487	7.59091632135956	9.5381235091968	5.29424004603653	5.49469599175645	5.92696323270461	6.81105975363834	4.97257836345812	5.19608163550805
ICK	861.790318209156	-0.919900716452837	2.8585802644213e-12	9.25833192625716e-11	3.54939620702116	3.77745611143884	3.24956597103565	3.56692855249326	1.81132646284692	1.83964314383278	3.21682385868536	3.45099989010956	2.92148378342184	2.76319469192443
ICMT	1478.98308176339	-2.02917289937859	6.29442974631858e-55	5.54507788501935e-52	9.22264923700935	9.21496985594336	8.38544967225012	8.58143714854197	2.21570822987231	2.02559985927602	9.98824042779364	10.383642972572	3.40723470466695	3.03311771910332
IDE	2700.24106973115	-0.484539160644518	0.00153388108500617	0.00761709437337196	9.7087611901537	10.5949615674528	8.32377139054119	9.32952087777372	6.28610038509211	6.96935405240485	11.5244259035317	13.5690056882082	8.10135710344304	7.4839413786795
IFFO2	341.180803355084	-0.833213966303512	0.000319684567429815	0.00200231866105436	1.13347332689165	1.33609233539378	1.65006149275382	1.80317984753543	0.835240188709927	0.785941987312686	1.61054953799811	1.49111091081608	1.35387388091688	1.10613736905812
IFI30	135.686603085376	-1.68608354698118	8.29307172979476e-05	0.000618871795032842	2.02894840137155	2.82866696527655	5.03541107601071	4.95902254746552	0.943459066752313	1.29852502123687	2.47360724132565	2.54782040200835	1.55265973090263	1.35418911713198
IFI6	80.3194762064109	-1.32852809893397	1.60889862267051e-06	1.91147571360969e-05	2.52894645901823	2.12785168145763	2.84100234960188	2.58503899606648	1.01498642855726	0.951342487426804	2.48544587389284	2.52403858047957	1.22165114181824	0.912374181496025
IFIH1	129.969946556948	-1.05994924887371	1.67345878014199e-05	0.000153646014837529	0.995340812627258	1.02360353717608	0.776460387920852	0.974218000960113	0.390644468028055	0.490414270565338	0.644930351760124	0.752460170020837	0.639800630041987	0.576528918271502
IFNAR1	1461.2773774059	-0.474868728705005	0.00820858893642906	0.0306998786820088	5.96476078828791	6.59398593501775	4.98443229003343	5.26454163549386	3.72019193379139	4.29971703915258	7.26298797378132	7.83047769070385	5.51024466064869	5.0173480508199
IFT140	799.518458039053	-0.444285254065585	0.0144354198359683	0.0483164251690588	3.30280023501242	3.11206691140885	4.33528629651582	3.62707848298007	2.72478428724305	2.43585953600429	3.19701888224728	2.92180071751518	2.7307160327892	2.9692888895921
IGF1R	5650.69190053052	-1.06178340537571	9.33818301987346e-11	2.441089712569e-09	13.0813896747416	13.4036633082527	10.9019650052824	10.7909522805939	5.42012799938592	5.86520353410286	15.3587476846278	15.8764479254491	9.16827848835681	9.62377535466674
IGF2BP1	52.676232600688	-1.45411126597116	5.9055563384877e-05	0.000461828660132334	0.160603600262567	0.197249524363841	0.122783867934418	0.177028222918895	0.058066468049518	0.0589268083754651	0.21643720975284	0.239356299254657	0.0944661246798403	0.12411610266269
IGF2BP3	251.164377775696	-2.67295560448858	2.16257410273801e-18	1.34637431505798e-16	2.19461981488872	1.95889602337037	1.29441180321822	1.79253746703054	0.227369324983372	0.326139481712356	2.7646518015891	2.92017459363605	0.612102196013391	0.438180776382613
IGFBP5	524.884882318707	-1.77493410372882	0.000348278453129176	0.00215384979490451	1.26009085373504	1.12100141717685	3.37515719192395	3.80288524124122	0.649019389099896	0.707441646912652	6.73386853210488	6.44370931797325	3.38734172492514	3.24958031252605
IGFBP6	353.157964641688	-1.46553829114756	6.22526659036562e-06	6.3790303089439e-05	7.82468720782345	7.05843990650004	14.1466902975228	11.129952113606	4.06624997776044	3.03119258280045	4.74970889051378	5.01413136207378	2.80265722215189	2.43677576424404
IGFN1	52.8703403624449	-2.80493884503185	0.000906518675374688	0.00488140358845557	0.0483034706293512	0.0382067020390941	0.250711454637724	0.207714891447194	0.0102654098287614	0.0273459558977801	0.204393071442062	0.159495513549454	0.0222400504226013	0.0257182310044494
IGLON5	77.1646333651631	-1.41102219308492	0.00709914686523136	0.0273040533984962	0.557812569040986	0.283024019495691	0.92841285093332	0.952064973968423	0.312863200200445	0.187522687250003	0.772727610403835	0.700217154584654	0.345427165285826	0.334758726738292
IGSF3	715.71788409022	-0.883765017165897	2.82033547195638e-08	4.86218108418781e-07	2.34059965104919	2.16225958391061	2.73267711248611	2.72290255175529	1.27075321932104	1.36346356368583	4.14453477237101	4.31653424383212	2.43763336882525	2.73595364251783
IGSF9	227.579555821263	-1.83880515378114	2.25175761669305e-09	4.76847565486957e-08	1.2783951267191	1.21495968804283	2.23747569747057	1.67290438458394	0.425699742607059	0.44721862988516	1.64490502321185	1.25984252335126	0.534582753510015	0.838693729265195
IKBKE	375.679534246008	-0.957433497659503	3.1906605093738e-05	0.000272101875675978	3.09945531836601	3.29042482078385	2.26486238656629	2.46043901825199	1.48664055190237	1.3138863308461	2.09513519981289	1.84868229672621	1.38417007499312	1.33330964291274
IL11	355.958637770066	-2.2123761594095	3.39931089957408e-16	1.64992999282633e-14	3.86076737132449	3.29950986563341	5.42455645275796	4.93227329692335	1.06041942540605	0.787696924762886	4.09910075791308	3.43248474842271	1.24046158186176	1.16017737558585
IL13RA1	1065.65880268089	-0.680491260922656	0.000538626485007919	0.0031155811028741	7.084519073789	7.38393740328961	5.31854045046135	6.43934473351765	3.63158732134815	4.36412148763621	7.99435811539188	9.18915297249147	6.1581041801608	5.68645110139567
IL15	114.988866501336	-1.47772709174645	0.000776750433021783	0.00428195293820121	1.5030234479215	1.4981847776933	0.699762711751272	0.770415760858637	0.474414582303236	0.314032617224336	0.943944408735659	1.03386358500817	0.639692816645923	0.666316577849772
IL15RA	14.3340333376531	-2.36404066604845	0.00198387868290279	0.00947097571759112	0.249948886704429	0.192742338016707	0.215390790558475	0.104015979816459	0.0438659394220433	0.0292135449256249	0.125010729164591	0.105478435507517	0.0913805084684692	0.0457910912351195
IL18	3980.42042988501	-0.990769926146223	2.85674585193175e-21	2.30885344794429e-19	86.554979018926	86.0218178173775	88.8517995779467	97.6961021901258	43.2512234871696	44.9754112763772	82.0119428505525	99.2065537531932	57.547707750576	55.6312953267787
IL1R1	147.995116450408	-1.35712702631385	1.53908565992221e-05	0.000142721843379839	0.562098988137135	0.480194289731143	0.810814712594075	0.870690806468371	0.267172125955203	0.251838684540228	0.427944001119497	0.635589859684016	0.243176870654158	0.175919995404086
IL22RA1	20.7755447376415	-1.750083066316	0.000985566342207311	0.00523032933233452	0.186575620696655	0.160799795006233	0.230683707417404	0.213518960593864	0.049115931159084	0.0654197986129878	0.21151376444337	0.284657003652279	0.102317169593409	0.0512714902367569
IL27RA	301.971598904704	-1.62576009708012	5.74034124588229e-11	1.55121276704295e-09	2.6549424043405	2.52658201683791	3.59759006362727	3.89929855438878	0.96659315142785	1.03643812489799	3.29169845899166	3.52177199391086	1.07897732981487	0.951900176014002
IL2RB	111.041873696496	-1.69845462518486	0.00810901364660815	0.0303919828631331	0.312974010343134	0.275793202518206	1.10507470940046	1.24267077853173	0.181624704236213	0.257034062059799	0.3968271292264	0.373738495043462	0.212825460909886	0.142196773484339
IL31RA	1917.34660343297	-1.35810226980015	8.14246767404595e-13	2.83522011756948e-11	12.9002651861812	13.605001373524	10.0563384787082	10.5799203770437	4.30933505639726	4.68285821771536	9.43943514848908	11.2121548513039	5.31279422697544	4.98742256016911
IL32	412.920512264148	-1.93755510965627	0.0013679262306631	0.00690785103412244	12.8022620398108	12.5254691298247	3.44860806143314	2.88184934234909	2.07643698447261	1.98898342386745	4.88310621793139	4.58465994728973	2.00271198387704	2.03102633576889
IL4I1	29.9345309035924	-1.48143213124189	0.00166808923363037	0.00816570042893387	0.321400233698526	0.451944261900742	0.265456542878924	0.276417465593979	0.126285927164242	0.103511454856661	0.162413779060471	0.143745575016716	0.186176802770315	0.0709844470198262
IL6R	482.081287036469	-1.67169770363231	2.49326970633802e-06	2.81957117817519e-05	1.32786029225466	1.41662898410181	2.78808218500953	2.71491213731908	0.620484214258917	0.639516315154026	1.88054982343285	1.72153116376455	0.480100524888203	0.474220283117458
ILDR2	2104.87606212234	-0.946526440804062	0.00736932052529771	0.0281153762842342	8.64478965651042	9.01294863117954	4.36430546575914	4.49941106047697	3.35345310316977	3.39367787912485	6.07644128994052	7.17180580521939	5.68562507394853	5.1979945687553
IMMT	2565.76337460454	-0.326859493346569	0.0140772123072026	0.0473513561742274	20.541740992197	21.4258627221401	18.063074935704	19.0563791186434	15.1088634751914	15.7047675887025	17.4380177940568	19.4936818234465	17.3092557200717	15.9237642400003
IMPAD1	2057.77199869333	-1.30886097262796	1.62694635235231e-10	4.10088237225972e-09	8.94308819569967	8.38021762843455	6.32050927115287	6.96617891714353	3.28322450307168	2.76351245674304	7.16419371190558	8.02188583884158	4.60533495658089	4.28852094858369
INHBA	3144.95127355025	-1.53237036738971	7.36421104027816e-45	3.41447458733318e-42	14.0317066672013	14.7910187497281	13.360991635595	15.0658458753953	4.83418530685705	4.83226430284672	11.170203416275	12.3274536320272	6.59702774345473	5.78931276689552
INHBB	3.16202246577217	-4.56986600946162	0.011782297538828	0.0410829804742947	0.0222489854965927	0.039107397389643	0.0129208176877105	0.0538173162342099	0	0	0.0287466169717015	0.0503759843553122	0	0.015794711812925
INO80C	180.885767027869	-0.729161232661861	8.09566190621758e-05	0.000606194080431991	3.86348125079683	3.33695295713379	3.68062391676768	3.71787474285928	2.08617791367423	2.21944690867984	3.51481059052943	3.50925885605744	2.01714313470175	1.7052070872221
INPP5A	819.839524572087	-0.831530001414763	1.64680257644902e-09	3.5601244901172e-08	5.30697926544694	5.08839772364107	6.04030695261812	6.06413162329955	3.05306938377422	3.12000659805674	4.93542358741804	5.25769432375932	3.53642567772976	3.35877654209601
INPP5K	597.620642119951	-0.550217666070284	4.06414244534504e-05	0.000334139644164882	4.20298478801015	4.00698893556473	4.29217723334658	4.60936234046235	2.70368732320313	3.00097266512076	3.49733456301033	3.78792609923053	2.64835997825958	2.54461379169394
IPMK	560.419031232471	-1.13857400821666	0.000865471328585394	0.00469914925680926	2.99393602119995	3.22902249537605	1.58001396400656	1.80618584616395	1.17023998248788	0.968919876147271	3.62642815016873	4.34957750240048	1.99307996177059	1.91081116744469
IPPK	586.504863491497	-0.421120165063948	0.00383061099268491	0.0163695209993004	2.91648255691533	3.03024126303952	3.29332588984077	3.33132978302764	2.09908387728212	2.4803235590466	2.20231353280634	2.39274161243913	1.77665011894126	1.92090038109314
IQGAP1	11481.6705580785	-0.401718843376328	0.00116422523365927	0.00602307556335714	37.3699406927734	39.3297400295593	34.5189232096482	38.3112818203445	25.8678418218434	29.4198792615185	34.5479234994783	40.6536251019038	29.0677506478963	27.4033101885905
IQSEC2	413.599334440863	-0.456001127535893	0.00434653249592728	0.0181903933600339	1.37406326982214	1.24853467477912	1.5305568146184	1.47993971914399	1.07191683490521	0.936372316762771	1.64508880147141	1.67369614545084	1.11069617507837	1.34420546887879
IRAK2	59.0345271558757	-1.92440657773238	8.55599407720277e-08	1.34117490788466e-06	0.534450262735968	0.498610861673831	0.376031551371298	0.535889188606142	0.139791859415016	0.11171717699145	0.350577796945749	0.222368479034219	0.0815391253713749	0.182408660134133
IRF2BP2	2511.37747156469	-0.677405047873511	0.000963400764812483	0.00513590259462364	15.4681622345101	15.0149006954416	11.3230337505078	11.2120883549359	8.18456304448879	8.03868670905706	16.4665590869424	17.7701713946121	12.3313831829486	12.0882809757308
IRF3	851.82220301048	-0.508294244442342	0.0142681310673306	0.0478747288659871	9.06427543332643	8.64279319236094	12.6705973750268	10.2499080110802	7.67215280491538	6.27701701968594	9.29579782067897	7.8094610904604	7.1569214232505	8.68885956186392
ISCA2	180.679387345081	-1.48813103138128	3.9863708937985e-13	1.45115431359165e-11	4.5878307869123	4.40069647960605	4.32001245240278	4.93215477824551	1.78286014820106	1.40501577695145	3.45498402728638	4.1715811432057	2.41410841443861	2.23332579531285
ISCU	642.852190343844	-0.828858250534922	6.51087469074492e-07	8.48484476155582e-06	4.2143215824265	4.29713370382292	5.17488056244418	5.43222766452807	2.57369308544779	2.67784529376904	4.51860304421341	4.47826849456371	3.35648050239455	3.11085231823838
ISG15	54.3398240979599	-1.87187433616764	0.00077696824697368	0.00428195293820121	1.6328032693361	1.12918205976402	3.85509862271014	2.70496210575249	0.728135075541575	0.517246429073527	2.04739794209563	0.538722155017603	0.455050234738255	1.10213174883807
ISOC1	401.223417669995	-1.49045774940117	2.57447937107605e-21	2.09031115387046e-19	5.41242411420946	5.37537224656322	5.59264939203473	6.36197119437194	2.01224256726858	1.94217368906313	6.69625770236947	6.79664644594502	4.70737739737891	4.69689136333836
ISOC2	365.977325067046	-1.08179921035634	5.00706855627708e-06	5.2542907023851e-05	6.77090490619362	6.90491448761086	10.2199633608288	8.93489703442642	4.14831445945842	3.42570672839565	11.2230333729246	8.53236352071849	4.00973606329497	6.47390648279168
ITFG1	780.14738536783	-0.359506350959671	0.00854957072954927	0.0317460245909228	5.11365832257026	5.62717365034386	5.03781693290611	5.61021463953417	3.79504258436726	4.33901503029629	4.75437244982666	5.86898085067368	5.77773226553455	5.57006390373604
ITGA3	14369.7322624939	-1.39484625476839	1.71901181666145e-16	8.75354601091275e-15	70.5503067746458	67.7005981728895	91.5858287951555	80.8886258032592	31.017729914212	26.6617548310838	95.4010180716862	85.9240759146912	47.3023770047663	54.0152871765405
ITGA5	4212.1038762821	-1.34170127336017	5.24031523874113e-09	1.03974227692996e-07	21.2581727342368	21.6881068304237	32.8951249521041	31.5522623848081	9.88132408538957	10.7702572774716	25.8362350664778	26.7192245491778	11.1051958274532	10.7854747074975
ITGA7	1037.4350269759	-0.718203496726709	1.84964072676269e-05	0.000167637962782056	5.95445217615219	5.15785186673445	6.59689284940988	5.62831810297135	3.81313102714274	3.12246654668451	4.67658537419532	4.53262729542853	3.78171183523333	4.12960310214205
ITGAM	32.2929078760088	-2.44749846225403	0.00146896715317266	0.00732363674922157	0.281775547352133	0.348678093565066	0.0829097147621844	0.0888574866566946	0.0357699233105882	0.0362999074565826	0.155334722687972	0.173912454595567	0.0596120602557006	0.0533425198739985
ITGAV	4810.73131076298	-1.95268468538738	0.000152642123034703	0.00105923653633258	29.4479286523046	28.5203197898227	8.35978248446639	9.70740312272935	5.11841591950672	4.53601264700026	25.3422998535898	28.5886622449889	9.12132732660778	8.4288172896241
ITGAX	588.707320316874	-2.15617055231336	1.378293265707e-08	2.50610413297127e-07	2.42974840788473	2.22268551989356	5.1422821353267	4.83300529821018	0.768187923520016	0.828619870815136	2.91894603481846	2.77693344052706	0.70454896646185	1.06561409412759
ITGB1	13644.1802892837	-0.64394247378996	0.000617073468919036	0.00350377616786481	91.0149680111911	93.107373969228	67.0310571247422	75.825091516203	49.6269395399916	52.7170390947215	112.998632641225	127.274829290299	78.5231211228433	74.4405502021414
ITGB3	160.868168779723	-2.42086408646366	2.1012194711085e-06	2.44043413720901e-05	0.509967296297566	0.532704442088918	1.32424520593503	1.54682325113754	0.188267700161485	0.167175018223754	1.47216864696251	1.4185873077089	0.590356548917068	0.351685685789627
ITGB6	6.71617356610299	-4.15617759810151	0.0122404884146831	0.0423953539174957	0.057052484411601	0.0748772741998414	0.0309236766400453	0.0163558304085193	0.00517322338714198	0	0.0432456574071832	0.0382749045489357	0.0215534781548736	0.0108005230126786
ITGBL1	742.152287658544	-0.723480894249854	8.60513424385948e-07	1.09310641847556e-05	3.30608717388294	3.2276009513194	2.93847760711638	2.96238423246089	1.97215741537084	1.71124033233166	5.0279754052173	5.3673035575732	2.36272893734531	2.21247237636685
ITIH5	59.4655017414762	-1.64000176809714	1.70039472914138e-05	0.00015587541484257	0.18202424637289	0.159973463476459	0.266913419885151	0.239714682776757	0.0526097340477455	0.0796912693931565	0.195201820388696	0.222096545363415	0.337811638204414	0.384430383656064
ITK	8.6601097873527	-3.49949948892282	0.00349633454080541	0.015135606455639	0.0367482814160111	0.0631576406308687	0.0758794698838518	0.0702334192622356	0.0111071452201257	0	0.0295433051653744	0.0369800801325643	0.00925525901162553	0.0231892127166398
ITPK1	796.644559261219	-0.509762789918096	0.00720268777371111	0.0276178794091439	2.10949253533805	2.12166650796093	1.8251335231513	1.58746931169843	1.24492697392235	1.37965448133861	2.39294254062621	2.16957220227396	1.61277250463431	1.74628817368492
ITPKA	237.844909782631	-1.17393513422657	0.000496011756757719	0.00291210634532298	2.59354402392644	2.37256479296009	4.88244786924091	3.81433179852633	1.63918996860022	1.3158102947274	2.66084221463267	1.87253294650224	1.67184816366896	1.75219647759177
ITPR2	2310.69442021852	-0.648395971507557	4.97267192603768e-05	0.000399332300204457	3.84506691516326	4.33104092140021	4.81150795895112	5.05815623919631	2.59175696025541	3.02345911723737	3.29051327847095	3.60271672055883	3.35265303361093	3.34516694796098
ITPRIPL2	2262.07867705403	-0.924582228974625	1.88898457986946e-05	0.00017075227277102	6.19395038420089	6.10823107928354	9.08744737683529	8.77470172634998	3.93984535880421	3.80885584037833	8.01540737403616	7.94331438121208	4.78403845434421	4.93135972468093
ITSN1	2280.22233569452	-0.871746395948445	2.06513776083475e-05	0.00018498048911107	7.59258868600951	8.0826497289783	5.71325118926856	6.14518194363322	3.41728997959186	3.94092041354372	7.73837526187643	8.86944390425693	4.98377425023942	4.83161229980266
IVL	45.8207534360779	-2.20936562359359	9.74876132515634e-07	1.21991069451655e-05	0.484293198356162	0.57532751504042	0.834043320670642	0.619382274192785	0.0908548871776467	0.171436301814124	0.500581604577948	0.268881652640168	0.170340115973215	0.165973938886638
JAK1	3160.14326072303	-0.516860647786299	0.00552656560573424	0.022150263741454	14.8473074386207	15.6494184094074	11.2551479473367	12.5486390908532	9.1143289527547	9.44464057828441	14.2825834203077	16.424117795095	12.2834184239353	11.452603621086
JAK3	40.4627433300142	-1.94526784044264	8.81335502998614e-05	0.000652996224866804	0.173873938230527	0.133781267956583	0.301020098862703	0.246880033066393	0.0446207177319368	0.0633945752232184	0.223804633346486	0.161765355234123	0.122697755601489	0.130421184955087
JAM2	196.171031274651	-0.651578625778902	0.0125185781764004	0.043154926411661	1.13375136827753	1.15945477794013	0.820243664613034	1.00954524479034	0.519205524957911	0.760709449824543	1.06534839385276	1.26766975620737	1.28926352588197	1.01352501117767
JAM3	535.00971772599	-1.0379705207177	0.00217390867123878	0.0102057279186134	5.02052634048711	4.74976826611206	2.75472678520811	2.60722660750002	1.626155101369	1.98398836484262	5.53601221093361	5.70756148810103	2.39057688203715	2.37377121973638
JARID2	944.431480487324	-0.737989609932444	1.86785394542926e-10	4.67467594666451e-09	3.57286733343907	3.94171315052665	3.77284441754356	3.87189304472417	2.16022790439674	2.27548429068499	3.39616710356317	3.38730993671097	3.10859353203987	2.99719733767618
JKAMP	1265.82308403853	-0.628004358882563	8.53077792031994e-09	1.61751103291118e-07	9.70527772542278	10.5939465709327	10.4782092726152	10.8979662971731	6.69808320011904	6.4692569552139	11.6003142486367	13.0803443137418	7.96068432860204	7.77556071535459
JMJD6	1004.28691249818	-0.376776126333153	0.00691258314918218	0.0267441375725606	4.072157275693	3.64192344358687	4.57386316380706	4.14631036785255	3.08126167675092	3.10161121795601	3.37051945482398	3.43842032198221	2.61350013690491	2.44559533965993
JMJD7	210.297301531633	-0.459576427500612	0.0124038122100402	0.0428807730621086	3.39740991525898	3.20840168373455	3.887762279885	3.54457127000774	2.69409977950383	2.30141923821955	2.72122511291191	2.73759505230148	2.98374710879008	2.38514587985123
JMJD8	293.261164874014	-0.987180422849268	9.31296802236309e-07	1.17287479332391e-05	3.65211685573689	3.31814743155913	4.14499589685219	3.05671000929993	1.81454802735524	1.68174644335874	3.48191717374168	3.0290648466385	2.06011329844645	1.98889256982024
JMY	435.623706627448	-0.63784885534808	5.83845398050877e-06	6.02270027415598e-05	1.22830351262265	1.16703173774493	1.10003516454263	1.17773400610619	0.749000464495642	0.719330342436915	0.980974761608751	1.04936631667806	0.863144907955705	0.812370525172769
JOSD1	2064.22300436745	-0.347320626242763	0.00404834284869018	0.0171378550338953	13.0212349547379	13.457088833813	14.5572194998844	14.8465550894401	10.0799331488161	11.357511874718	12.3004807368348	13.3906096250332	10.4050316207242	9.21070803501175
JPH3	760.006975603594	-0.518652773529741	0.0058818925349286	0.0233197715060547	4.1448348214607	3.686447312759	4.38293941600092	3.43142196876476	3.00873916981084	2.33422997383935	7.31050291389749	4.39820724437579	3.03193582336681	4.37427558449354
JUN	2240.14463230752	-1.22560552524713	2.16449355655201e-11	6.31394237961753e-10	18.5136851399877	19.070569932366	19.2537875307488	14.989374115797	8.37659913386505	6.64765951190201	21.0106281141749	15.5856712877348	11.6738255825961	13.3600779545869
JUP	232.703990806395	-3.31375477301697	6.66953464617514e-13	2.36439700062293e-11	1.32127135221713	1.15049102565808	3.16958744442035	2.56770918248455	0.186620936835641	0.21481282535818	2.17463076745961	2.15293828615687	0.535630966157698	0.577218373551022
KALRN	705.634909427925	-1.43376300760257	3.67132885101789e-15	1.60509039766958e-13	0.79172018754274	0.841907016565429	1.04310128618343	1.03741338191456	0.315000840311519	0.355334707948499	0.725253507660493	0.866631648613507	0.545377148003385	0.594321345904999
KANK1	471.508800113008	-1.26729521351882	5.90535835031478e-17	3.09662228494631e-15	1.95415437989731	1.90928902040744	1.95120073587438	1.72873750684502	0.789400204209455	0.74275961513633	2.55374366971068	2.60411338481896	1.3547938261123	1.1982668967484
KAT2B	494.39839142992	-1.03568960067475	7.07731011778376e-05	0.000540922358763867	3.16702709000357	3.21662396949941	2.03450648907951	2.22478623496315	1.2867342230466	1.25415371340426	3.00616078438295	3.23162937505242	2.00618291300152	1.9361045762849
KATNAL1	1360.16328922638	-0.413740112478589	0.00124069361832647	0.00635274073272135	4.25858173433218	4.25260947796535	4.03096573796091	4.14586550560462	3.31976045329393	2.8046488756781	4.64689119573824	5.24218313141676	3.88593556826292	3.63707788493858
KATNB1	582.747631576801	-0.817596788126194	0.000684882817726596	0.0038344297316571	4.64876407562736	4.66114063853609	7.27748209389158	5.64953006021254	3.41802455018683	2.74215379426777	5.73828538873061	4.40689381910658	3.02376237613828	3.94109696910335
KBTBD6	254.997427728276	-0.753849719757073	0.00807832563121921	0.0303128831683326	1.48671993846733	1.4672455180545	0.958446385497813	0.945783401787509	0.714235327925078	0.695989797460092	1.17016546499268	1.18727026122453	0.564234437962369	0.571289409002496
KCNA6	495.993589880553	-1.40657875141933	1.84339248238283e-05	0.000167309617657382	1.62524503142924	1.53476582000579	3.05838975146253	2.84685020436435	0.851764567290437	0.813962273319159	1.93882899802666	2.11564246776025	0.702990954810093	0.736721055262118
KCNAB2	334.120072350047	-0.533868065550498	0.00759529489393083	0.0288058844261797	1.21983984958025	1.19287749793897	1.64335948722857	1.53439376756255	0.934840458396778	0.949759844214507	1.41447534103099	1.15587619307641	1.1088115341215	1.22642864966642
KCNG1	303.841698665359	-1.12747019099593	0.00236963270124397	0.0109437899248276	2.37693328388599	2.46161689028556	5.33495906175048	4.29053031880528	1.79121228583227	1.43535884067904	3.34500555674813	1.98788475201496	1.48346376524671	1.89262624455642
KCNIP3	227.823404961828	-1.4273565260297	0.000552963149685234	0.00317764440127336	1.24085844286392	1.40419796215533	2.9922592344138	2.63621209038474	0.900116863685734	0.59945380817222	1.85059800732343	1.43896133855647	0.729950651653716	0.822167887524297
KCNK1	227.199230113571	-0.754848547049478	0.000112943269711755	0.000809909429813351	2.55732063166818	2.26202181245647	2.81695948232276	2.86454280556315	1.67181295896096	1.374915687277	4.1440622853893	3.62773654420715	2.11298291321497	2.35424162967269
KCNMA1	718.886158489176	-1.45231381910597	1.40434324821846e-06	1.6932237973486e-05	0.858397537901998	0.88537809459627	1.53473298795884	1.5446722582878	0.44152616001401	0.417056601737172	1.1698880633386	1.1992518088434	0.607423242762617	0.590822597607155
KCNMB4	124.133680978462	-1.48504305319071	2.8091641476512e-08	4.84766533961474e-07	0.777219454730975	0.84885813254641	0.63102812478647	0.62463522101632	0.261712550008943	0.241504820812663	0.491375506102951	0.546726027035008	0.397670567043641	0.44461695903865
KCNN1	45.608339464242	-1.33615946994049	0.000457339754131386	0.00271949683700334	0.362310116663088	0.415124213766463	0.576671119870963	0.504910086444403	0.155136344096382	0.202581695617102	0.7004458898626	0.600907358233222	0.349790967041555	0.495360683240888
KCTD11	237.821542806789	-0.722940612225812	0.0004482860105179	0.00267468717213508	1.90232467401023	2.00214513300482	2.20950211860074	1.61851247939283	1.09527722623363	1.19104244226558	1.70091521343329	1.80862517535926	1.28963172908799	1.38361416975301
KCTD12	154.017246556618	-1.69555233337878	9.78097427093614e-11	2.55305163969813e-09	0.760298525148717	0.799823713904998	0.554407075122793	0.6514298841768	0.213817442817764	0.203670446368598	0.75928033350444	0.701815817532312	0.207322550430051	0.182619232901965
KCTD15	700.200204135586	-0.708389820992524	8.63979276523913e-05	0.000642026607890123	3.20972742714532	3.10552540451157	4.16463208876715	3.60217018423686	2.27621933925232	1.93389284191245	3.51569610129925	3.30999543055524	2.04418308612467	2.18110014478715
KCTD17	583.980490998708	-0.550455465894996	0.000946381102418079	0.00506048213763403	7.32865330167566	7.33866034696236	9.41483867875341	7.8461238478454	5.47820629003298	5.16924248398566	7.63774498444282	6.56222154830559	4.56482895726446	4.71536095627964
KCTD18	257.770654657357	-0.59284011941239	0.00110092533365545	0.00575413926243709	2.2261248274698	2.26125263640929	2.06986411051267	1.87069466224939	1.4200472079108	1.31167931755085	1.70559067879054	2.04694472950091	1.63891603224276	1.62719821774505
KCTD20	2794.00537038036	-1.11500204200309	2.69221966679558e-05	0.000234474633263823	15.6220228108043	16.2211554580003	9.86823714232446	10.4573267780932	5.59245058340143	6.19970796641399	11.7137834209807	13.5655300838413	6.30325964236155	6.13068267499002
KCTD21	496.692265788406	-0.86193461598222	0.000132247397478039	0.000929795249866547	2.99128342320065	3.10672986958094	4.42516135123571	4.34977098639733	2.01998002307808	1.97113599993162	4.50765063554113	5.11725783970018	2.39096279946899	2.16078817994159
KCTD3	1614.72168185844	-0.672753725903842	9.37260673497481e-06	9.20956423808747e-05	10.2980781976797	10.8917595194935	8.61620559499268	9.6538056800994	5.92033440379303	6.17596086783486	9.23158015032747	10.0914958006574	6.99377206928488	6.38742260962181
KDELC2	740.635618917404	-1.04391185818654	7.9803315219481e-13	2.78426655614264e-11	4.66454548403514	4.36695642236085	3.99607232815371	4.87236811231178	2.10915953510216	2.13256167352105	6.97141136442166	8.39338114964691	3.60873519490407	3.58734323604957
KDELR1	2179.60929329333	-1.95398232240283	1.64971427521638e-55	1.61479532305764e-52	37.9439157167542	37.175110177965	42.8208511942649	42.6749273107642	9.76416509681445	10.4678867282662	41.0781402139534	42.0430602979142	18.4913476890748	17.3942180332866
KDELR2	8039.8875031652	-0.946323820318931	3.28946289970471e-05	0.000278907828825299	84.298022022572	85.5637310967282	57.4399693964013	61.0597805210263	35.2597373589538	37.979293800135	72.3533251774844	80.4828860962685	48.0945457047388	42.1614427764096
KDM1A	2268.14169286198	-1.05339511470216	3.14479073898813e-08	5.36899884013874e-07	20.8163355824068	21.7598870734068	15.9873702016704	17.499500137018	8.33462731914734	9.58368817183348	17.3353388035757	21.7617568765056	11.5750016581377	11.2176641009502
KDM1B	507.194716878422	-0.53855295525804	0.00364458418141849	0.0156963893161604	2.7879127161966	3.22162198191666	3.02969833944859	3.58075346053578	1.83963561717861	2.39473416902967	1.74517558780435	1.93977512575848	1.64762240347655	1.65256503150805
KDM4B	895.13287094896	-0.824723505463871	0.000766547954047712	0.00423246894464639	3.35668117236264	3.39129466872835	5.3473171816121	4.05326770894187	2.51426873942986	1.93669691871025	5.4230649399681	4.04381983286005	3.1444028071237	4.282500864687
KDM5B	2714.46706884902	-0.711306834633788	1.38007077835629e-09	3.00933998067568e-08	6.89770986777859	7.09985803184424	6.52208691455736	7.06386971814875	3.85853392951378	4.36829158399092	5.49833028655009	5.99819838586814	4.57333179660151	4.1783033477633
KDM5C	4613.36580931403	-0.336432010148787	0.00528227842121204	0.0213264123518183	14.6783077680951	14.5906382769869	17.3804015716472	15.7240799042637	12.0563124495779	12.0641680466575	13.8373906092348	13.1238746379587	12.1131162864566	11.8845999332037
KDM6B	1174.22306662307	-0.683592471353983	0.010722202908536	0.0380569083492136	3.43031466610933	3.24939654841221	5.89912227895317	4.74835507921304	2.7198191091411	2.54035391477577	3.74083791657658	2.98634005108714	2.25730438340715	2.85051079781627
KIAA0040	208.565061148947	-0.919425524182079	5.33880240685899e-06	5.56021374633268e-05	0.95456241627549	1.12198187986117	1.13409024572676	1.15937533358472	0.490587145623934	0.633634803978483	0.77577678002152	0.993580695590712	0.569831146186028	0.444869856631567
KIAA0196	3253.03868181655	-0.425287602647049	0.00933669701021306	0.0341434754302499	19.4106706646272	20.3973386823514	16.146896134242	17.6648790145162	12.3184720770398	14.4742067967634	20.6165353400938	23.728311577751	15.396933339887	14.8159137114904
KIAA0513	594.891149602498	-1.52290862850631	7.25492656397405e-26	9.00172895286329e-24	2.03843460910784	1.86053794562532	1.83212115190726	1.87359944671656	0.615803161939238	0.67664776613247	1.86124927149341	1.75379270131493	0.836473415376219	0.924617080977256
KIAA0895L	639.00545557709	-0.481457368669843	0.00220519850481152	0.0103086740398711	4.13691256099863	3.96661730852868	4.99370602427528	4.8306933085216	3.24480546972593	3.02691849637315	3.84248419662124	3.55095539526	3.99924913948846	3.40954404751095
KIAA0922	696.473629501186	-1.28190539646898	1.06700302019812e-15	4.93425884852248e-14	3.68687499801802	3.95071982583544	3.41174332634944	3.85284494515106	1.33336199487697	1.65585329498538	3.92836066594559	4.06398726947439	2.22210304705179	1.99704446490617
KIAA0930	1875.58824051874	-1.15821033432193	4.32935247965982e-08	7.18256698108535e-07	8.9065545910922	8.8403499809351	6.91155015708884	6.19418644836724	3.36290154804826	3.40218294635003	7.35684926738991	7.42794338536123	3.71843480268491	4.02325793888368
KIAA1161	972.907744000333	-0.408335051125186	0.0137208204339786	0.046427007955657	3.04262212444677	3.24773434318783	4.06401816692993	3.85677777078258	2.62596350889729	2.59901282711006	4.36577035193487	4.44241406179822	2.86527022591993	2.85902664006122
KIAA1191	1531.75797097984	-0.909050168458857	9.47209833958394e-10	2.13140358422898e-08	12.7056742939877	12.2858998144939	14.8743836856828	15.5283453133398	6.99989953310659	7.39488759614854	12.3060915176843	13.4197211704369	9.91649330624868	9.75771343360835
KIAA1211	640.923532466063	-1.02985353665311	1.76830629536254e-12	5.87845068264011e-11	2.23187019455144	2.25549809348158	2.50663955262057	2.5168848827847	1.0406839159669	1.23109702362533	1.9075571301373	1.98758746772294	1.88991517996297	1.73239588286067
KIAA1217	1645.52579388275	-1.19038825433565	2.5140607740387e-16	1.23385060662362e-14	4.63784008121974	4.91089585458708	4.72489060414293	4.65989110054975	1.78390332132928	2.26525100384551	4.31264665666259	4.67292582295538	2.51759291209614	2.49298107523166
KIAA1324	479.016602633211	-2.45818915743153	1.70405455912299e-13	6.47063303387673e-12	2.13880435379601	2.28167893542298	1.22184603499335	1.28078491408758	0.293273415215383	0.323547594508592	1.85504009023594	2.01640707893944	0.617111497323718	0.612288709185343
KIAA1324L	743.534756900439	-0.856034592253543	5.28836598437566e-06	5.51662050199614e-05	2.69405654509872	2.96354799725268	2.2977367676379	2.55425717730524	1.24057041289574	1.59384262735376	2.31713041878326	2.78357805091341	1.51257099356159	1.58789370641232
KIAA1522	3515.5065878957	-1.59119933441144	3.4484816627935e-05	0.000290990413873365	23.1725555293577	24.2808384902449	11.2761734537869	10.5978107869543	5.94710752254011	5.34226939186017	23.0052878648851	21.8211013716849	9.14344141662047	10.0187595405621
KIAA1549	882.929931414252	-0.51834407431521	3.91833564287443e-05	0.000324727919528714	1.60237857775448	1.63595555165392	1.74115738392702	1.84293139261392	1.10825123302676	1.21624918261449	1.83272348176324	1.8651135840199	1.42097830443058	1.33408882437749
KIAA1549L	2107.36356004014	-1.57938827557167	0.00138520740219928	0.00697911616223882	2.38869521708938	2.49599766590901	7.54097615991061	7.80781809183461	1.66097511362869	1.62682236934104	4.59237349077285	4.67938607288152	1.99955808827326	1.8558514526283
KIAA1644	28.4448211250262	-7.73731900644048	3.01377895566961e-07	4.19429474091176e-06	0.156029220904844	0.171060780215252	0.135150104607694	0.0824482100807438	0	0	0.155809990252939	0.1543521688475	0.00299721560931294	0.00375478796620862
KIAA1755	41.8819940014455	-1.32772513574188	0.00771471348587522	0.0291873602979677	0.0945286942281546	0.179837916318	0.226043781054105	0.20623536422358	0.0907557006195925	0.0470095690178724	0.160930842610137	0.162271985371335	0.0850770775739582	0.102633603818702
KIAA1841	618.818649866262	-0.495940990893966	0.00038529642266498	0.00235060168661159	2.63663604675338	2.84954208783756	2.50660604423377	2.65844119915521	1.96124251647901	1.72987761559048	3.41577235484555	3.55815744659645	2.7334492969206	2.77687166983414
KIAA2013	645.471389174961	-0.699341965228341	1.83756291332228e-06	2.16562013176088e-05	5.42451033702993	5.27463619755442	6.42512031945841	5.51255216306065	3.38408707691129	3.42442146368166	7.41501826425283	6.36110067653144	3.77889963266591	4.66232141470436
KIF13A	1547.39749135298	-0.505305011961876	4.40245788414127e-06	4.68682208221662e-05	3.9545088688475	4.38413940688364	4.24614708351178	4.42064930057114	3.01903653280409	2.83151462833058	3.15709044617156	3.60888821745893	3.70047644642141	3.250291225173
KIF1A	1354.05290711599	-1.08987364983791	0.0125239258127678	0.0431586071633765	2.11821078703406	2.12102167532596	5.8197753043519	5.23670541860087	1.64592884116175	1.8471105724556	3.72681315486662	3.20312927869957	1.79833900810447	2.07645411746514
KIF1BP	831.962371763118	-0.788892368277264	0.000195512920738633	0.00130929006100113	9.10612947657698	9.45584599516335	6.50050399422408	7.71869072228374	4.32537984245683	4.94902704399157	8.52184141478154	9.67108932400088	6.62095409519202	6.07663524188987
KIF2A	2725.07215781354	-0.472091856756685	9.17794344844941e-05	0.000677445268614286	14.2893777962303	15.3600845044362	13.6408409121445	16.1479147850385	10.2954862563669	10.6270495284921	15.3273351897947	18.1367652443456	14.5605647750643	13.5197068883077
KIF3C	959.022664159576	-1.18067732768154	2.6537795941599e-12	8.65869308694506e-11	4.15558488869407	4.18182003396163	5.42516728416558	4.98620259055624	1.94207340024995	2.09317658224599	4.29535116041937	4.45926247078187	1.76335945870142	2.06924975179788
KIF5A	156.270848238014	-1.20898548124117	0.00196432702437771	0.00939453795942206	1.37693787230501	1.41517197328393	0.685405115331725	0.777023658308145	0.39198218500864	0.508287195313593	0.992964359907812	1.0403682818146	0.471794962390671	0.506610213768683
KIF5C	343.215683913425	-1.33308334268649	3.84333603910161e-05	0.000319715475320733	1.0742396830129	0.987763731512421	0.602719221957258	0.615700197886766	0.281890631880992	0.355400351925321	0.529837806101425	0.632051895771052	0.37833622817908	0.334694961515054
KIRREL3	199.923961959239	-0.701292752830756	0.000983833240590611	0.00522427904338938	1.04347035911074	1.0076635955045	1.34824966277434	1.25693922295485	0.752372011765526	0.647834737683063	1.57669855625418	1.36211603835304	0.888150232483494	0.981739359951817
KLF11	722.282854808626	-0.60687779469536	2.95162975063178e-07	4.12736226796678e-06	3.99198641602361	4.03209465390875	3.98110664446073	4.38527472728176	2.63013372328656	2.62614536492952	4.39647253627379	4.99849138063714	3.23568680879805	2.7985887332637
KLF5	1214.66431624515	-0.37302110975314	0.00294613502725515	0.0130816413924416	7.43703052013408	7.49561231680429	7.04730829545306	8.29168834998082	5.4909619672416	5.92099879197154	9.40743583636685	10.3358781451337	7.99223091928177	8.40550199302863
KLF6	4675.12065590314	-0.726286388227325	9.51158234027701e-06	9.32579684214472e-05	21.7273727783787	21.9706566485513	27.5763909543862	28.5583157274507	14.3650648474702	15.0694205184546	19.9166761201156	21.0294041226514	15.4890432281383	13.7250692663185
KLF9	667.540090056686	-1.0363408932908	1.02099573074945e-10	2.64932603535709e-09	3.30319789595331	2.96020020390901	3.21636689108023	3.87125986632182	1.54103748908255	1.63710282519844	3.30461349870504	3.51693090727534	1.96300702644461	1.87597079734292
KLHDC2	702.060024663478	-0.575465706071196	1.21808636820301e-06	1.49141513004648e-05	8.95298375616525	9.2304068373733	9.56172703619034	9.9538857894514	6.05501163067887	6.29459690929013	8.2746165998649	9.27765460121179	7.54022774345688	7.2737665160743
KLHDC3	1713.58634442483	-1.24989793622214	4.44472896812393e-32	9.78895996117193e-30	23.0894522190262	22.8826311552357	22.8900060867009	21.8987253376365	9.27122598711867	9.37355439046711	22.1593560330231	22.7908288805107	10.51740771368	10.0291335037988
KLHDC8B	285.749417201805	-0.571207909363196	0.00522153681615709	0.0211198937474453	3.35884023239305	3.08138709386888	4.16198414482512	3.34058978402477	2.54073289029278	2.04999612761968	2.85913707581314	3.06371425256787	2.36140123828303	2.57573158055561
KLHL11	1612.9444424085	-0.879027121192796	1.4430940933003e-07	2.16944324486842e-06	6.2583379721158	5.83303538087951	4.80680925801544	5.23550374208577	3.05008893919262	2.8362334225322	5.68291789434426	6.18643393604133	2.8769689695788	2.45287035205729
KLHL13	138.417536733204	-0.800167915467641	0.0030700511309108	0.0135634982135199	0.844987817992188	0.820172673946045	0.6296798447904	0.619001975524772	0.4678512200984	0.352216829612935	0.56810140045984	0.782593358748726	0.525445589843737	0.414064597956493
KLHL21	721.257318222194	-0.967741456502222	0.00215435886284918	0.0101328480524666	2.74868794603966	2.55320610179975	5.09721446284059	4.61378288250691	1.88879821497823	1.85053811887062	2.71502770582247	2.33270596906354	1.71622086116017	1.83922710759997
KLHL24	1052.56334878754	-1.01087541909957	2.12866322976669e-08	3.7467449995264e-07	3.26714799426059	3.2634717531837	4.07161360623707	4.31786613103608	1.67425360205519	1.93620662392362	2.54220440435701	2.95237090626036	2.42351508478039	2.3141903937967
KLHL25	410.786455044894	-0.698867769834891	0.0019758488038666	0.00943939264515336	2.4443754582455	2.49112953353098	3.23261633128421	2.87760363494269	1.98820613648966	1.33870692851819	2.60663832486734	1.95809340221522	1.77740175314978	2.23352792453679
KLHL36	1321.11715311481	-1.01678017364304	1.85571270652158e-05	0.000168015427421396	3.61068083506031	3.62802207290339	5.70575292336424	5.23556157436724	2.26462627317996	2.11629504952611	3.91007232333543	3.52191301480829	2.23986573540855	2.38075661577338
KLHL4	313.366902858286	-1.75757171074547	3.27225086236989e-23	3.23897685079186e-21	1.53455299967362	1.51134895466212	1.35090403955942	1.63990385736506	0.430687855442457	0.441271718739926	1.91032193982381	2.31941280203232	0.869592837991356	0.747874883463147
KLHL42	1533.86405462187	-0.427480480147625	0.0025524877623389	0.0116291789816284	5.07886231512044	5.10347001919067	6.26065448043773	5.95182764892499	4.14172550736831	3.98723115891209	5.40349745948349	5.55182785897303	4.7410761757877	4.68345922696153
KLK4	15.4181942504903	-1.49750023453063	0.0139134684967688	0.0469259956823449	0.32794333386948	0.202903796169517	0.365661992839842	0.352556002229259	0.0892086019703254	0.126742502488215	0.0949124873819167	0.145205243107394	0.089201900319552	0.20487217254035
KLK6	169.416808743373	-2.95678826954792	6.12050873696534e-21	4.83575082675302e-19	2.24250841000872	2.18614898779894	3.17369291750595	3.31233445028895	0.320387130226407	0.364150234421743	3.04837209454725	2.33250747857992	0.224254143165935	0.294314252095492
KMT5A	706.608474829649	-0.419249839709996	0.00442218543591708	0.0184369344996268	5.51524620999681	5.97828306453305	4.97854596981158	5.27176840403649	3.81803490476563	4.12179163984604	4.94826853172933	4.87606028685257	4.19793876139587	3.89464001809212
KMT5C	185.55794765955	-1.10205397163945	3.89390195247571e-05	0.000323254441966847	2.16178427724581	2.04103691841971	2.58259669953752	1.64342094745524	1.102609047913	0.820560272713871	3.16819092555552	2.24534447953352	1.40003329042034	1.32638982559796
KPNA3	2010.83372539204	-0.47771687844795	0.00557625006903029	0.0223290795377829	11.3162000328055	12.1192985370998	8.87184958214438	10.4691827946379	7.44099038339938	7.57461381949756	11.260231060171	13.1759108954437	9.11312851863207	8.59352883510114
KPNA7	17.135981889477	-7.01543703479721	8.36285837859884e-06	8.31988716953885e-05	0.563617084293809	0.278857724126734	0.181840840262495	0.269296640953385	0	0	0.204979536357349	0.252076549350157	0.0118291747203621	0.0444573050589209
KPTN	144.970077750755	-0.555474387701662	0.0126219600593791	0.0434093918185048	1.95186127326404	1.75939372029486	2.2205342929872	1.92617912764271	1.483948278323	1.13635932922933	1.88300832630693	2.25628090887552	1.48610566273531	1.98963705515425
KREMEN2	98.4279336639627	-1.37003911327961	6.01569417123015e-06	6.18020499142297e-05	1.52530478110331	1.18210046062024	1.42936153083469	1.04349720928169	0.565800245379511	0.418675403212164	1.9886733535766	1.17735802036054	0.923285201606019	1.61193211672718
KRT15	130.590415397996	-3.33982336834724	1.37787420081422e-07	2.08344714843303e-06	0.833218460927426	1.08990616203309	3.54471046659519	3.34344951861935	0.224020253404394	0.19892201324628	3.24468065171242	2.70066686418363	0.406280720450003	0.385167782090187
KRT79	64.6238451466177	-1.02606745499838	0.00184192060528088	0.00888874257585423	0.673042580383981	0.715877377482531	1.04229597087794	0.825595373197118	0.340348520063165	0.437694128571052	0.66000340243741	0.607822528241061	0.12713213721729	0.294029339944383
KRT80	4955.28266251253	-0.989371552958893	0.00801746053885238	0.0301193256362559	43.3863573408851	45.5714564930001	21.8594669045891	20.2280228545609	16.4385749257861	15.9404450603916	30.9381072698488	31.5345454369491	16.6656363936004	18.3690186369491
KRT81	757.620516646526	-0.794568895899221	0.000632531202376825	0.00357885910554826	11.5642159897961	11.1427212701677	9.3554668729591	7.7161477236803	6.25849252442853	4.97115116811091	16.1208469377886	14.0510020167963	6.17762856893668	6.54641187749994
KSR1	546.000423684999	-0.739823544633041	0.00010744332209048	0.000777111614085452	3.46933815984695	3.13138704268827	2.91842604054865	2.57751644307153	1.65209325155946	1.88888237550949	3.01160338576792	2.75622777907804	1.73204825486879	1.9556726588808
KSR2	657.374854099951	-2.68940775894482	4.10602114242334e-11	1.13569837532742e-09	0.686540731249408	0.735468780671086	1.61549535084818	1.62712720731583	0.153966661904852	0.197479991015343	0.787636684803134	0.871236115444684	0.408646240904175	0.456872347355667
KXD1	675.261010537572	-0.876735208049655	6.48303762115375e-07	8.45482160230259e-06	9.75170846339212	8.93629268686016	12.077212180076	11.5083900201078	5.43953151547024	5.79613250354104	10.4647580125798	10.353498124523	5.5881399447267	5.69381401288119
L1CAM	4592.05298271273	-2.11163003440925	4.20376541933575e-19	2.88195108650882e-17	21.8603497932361	19.4918967718959	31.1611140801608	29.3214141806723	6.42945216360032	5.06428114428821	20.8872085363201	19.6163515017699	12.7153292948162	14.0219798884656
L3MBTL2	855.693936453284	-0.469014228026697	0.00399909155795033	0.016957880664146	5.94791810934817	5.44236037488894	7.11593187593296	7.01273650389136	4.40576467700814	4.59341809446628	5.36864685944249	5.34474148550876	3.98134741092609	3.47312946363815
LACTB	577.166989683292	-1.02780193027683	8.62617783909694e-16	4.04214434433641e-14	3.92973365541067	4.03382968002399	3.83901756190873	3.99753380845314	1.97321345451676	1.81451736509333	3.75131616622578	3.86002865989582	2.67119401423071	2.31312244167334
LAD1	20.6084685018045	-2.72427192533268	0.000121697460951243	0.000865752140230721	0.270010913720758	0.300213673374385	0.138572242531372	0.162014322912427	0.0341625896661282	0.0303351639453125	0.473807836546963	0.410730575743431	0.0640500436073994	0.0980701946045563
LAGE3	86.9032226821084	-1.41458489841489	5.75439004571533e-07	7.56616404592973e-06	2.8928956194819	2.40376564503189	2.50910978885558	2.16085251642416	0.970897918430252	0.862122802093837	2.15526927729561	1.89035276734312	1.63933165703177	1.25354921703897
LAMB3	7074.78929302778	-1.42368085695384	4.21607444482863e-08	7.01444906925737e-07	32.9611109939541	32.9980911006109	57.1603823727689	49.0230321123553	15.826562575657	15.4472711719351	43.0021890352054	37.5311605683334	13.3855835812777	16.6562878669784
LAMC1	6897.59972434135	-0.86222422952432	1.28142476418715e-06	1.56137087968281e-05	24.1158245712048	25.3665332114	19.5744000443274	19.5949347917377	11.4272996351574	12.4231590368316	27.8045412503939	29.1365374794791	18.1425742568297	17.2611634122883
LAMC2	2547.60626679815	-2.86604568005937	4.50347035961856e-11	1.23400690927091e-09	17.1772996580382	16.5178689526636	6.56861050912181	6.96103312196727	1.48397130711713	1.69514929977164	9.52639811347526	10.8028413711102	2.19037097459278	2.42484530197943
LAPTM4A	2218.85899924362	-0.498854967533805	3.19385271021356e-05	0.000272242336242151	29.2706203542561	31.0329938657072	28.6124553146585	31.3154103721986	19.3975184124276	22.1403084631653	31.8837279526575	37.4238224702557	24.4396781596477	23.2459901572941
LAPTM4B	1870.33102519133	-0.420475987540014	0.00103128727227417	0.00543865090994633	19.324531322746	21.5843302088779	18.031829562797	19.8072011270667	14.3877929243207	14.3535884067904	18.2701449068775	21.0656249860422	14.2458782870926	13.582905201937
LARGE1	863.160688319416	-0.553841495099657	2.26069882617219e-05	0.000200459248204971	5.07948549299845	5.02430914875813	5.14066926669173	4.5893677569316	3.18597660189836	3.41329083989135	5.75035665764969	5.87590576544408	4.80938596105178	5.07305013633391
LARGE2	402.290305469011	-1.9711273493944	5.643349133934e-08	9.19798042467929e-07	2.92212239602491	3.05048208344848	6.27129618497302	5.54716621420792	1.21932577352592	0.991802653828125	4.14509663977442	3.40195285776222	1.32626618127706	1.37000177386178
LARS2	783.31353712049	-0.704913399782678	1.11202031485926e-09	2.46613873341445e-08	4.40691235181575	4.61038345343478	4.72440645263604	4.7285384771797	2.6767929286719	2.85330076466175	4.30085092333151	4.57129396935387	2.31221385514253	2.21012287048249
LAT2	834.870984363895	-1.02285194678481	4.63894262436227e-10	1.09123538182428e-08	9.24302673606054	8.59240033628373	11.3498119688781	10.4353165346649	4.60370131194082	4.91336892062655	11.2695660345383	11.8722954153469	4.50929652055824	3.9508766693896
LAYN	2424.68824381504	-0.613167391895286	0.0016969901711999	0.00828234621229115	17.7387159380208	17.7789255968009	23.4521982041983	24.8595156275544	12.4622365817374	14.2571192947532	21.0272910685548	24.1011753096581	16.3592088563228	16.3666625197835
LCTL	546.927141589444	-3.12932519580214	4.26028344297017e-74	6.82381218015377e-71	5.17886000631986	5.38189154818086	5.91787320146319	6.00471585327893	0.618169825287024	0.635583250485182	5.38394916742289	5.92766053192046	1.7147501834491	1.70664748799821
LDB2	43.116688774761	-2.5137163085485	0.00328331392727313	0.014365211841228	0.514394939704813	0.625377476201135	0.211599264116293	0.184333699127695	0.00728791644590756	0.12295679879577	0.28246337704295	0.285780201800591	0.0425096522262247	0.0532543371690671
LDHA	13431.5498975454	-1.02942347710222	1.30713785052005e-13	4.99576177620667e-12	143.789101591599	148.600359064945	122.173644430236	132.112751431466	63.6516688210387	67.2560913890442	158.722660909371	185.289971812946	94.8166410852006	85.3813369204811
LDHD	4.22307265031395	-4.99255162523452	0.00513219153910266	0.0208512261874623	0.0258112928993411	0.036295137635272	0.119916662227159	0.0832454143487659	0	0	0.0711451022349833	0.0519482078052689	0	0.0488629839386338
LEO1	264.985667272066	-0.59604288138064	0.00476165566070632	0.0195697716552332	2.38629128894066	2.45634144654178	3.08863216425792	3.36182968361951	1.86677779997116	1.78007100320432	2.73255079673393	3.0291455976226	2.20072326123021	2.03728290689373
LEPR	1123.4909370727	-1.29132370865536	1.40414144452729e-31	2.945186679896e-29	4.45998365413523	4.35440524552795	4.23967728866182	4.46931729209989	1.78042815206217	1.71843135039937	4.96295678780517	5.49039258891885	3.08736825348492	3.10740498120151
LEPROTL1	405.755978475473	-0.801526430783467	0.00215099625104643	0.0101274150564721	3.45550358238907	4.02264381061786	2.42124709462873	3.05713442299131	1.56406746016952	2.06615047609661	3.14428797399053	3.36899066647376	1.7527025437907	1.616624137821
LETM2	427.869741085009	-0.517917557931983	0.00101087667557023	0.00534693369764992	2.25679541833294	2.19062386369902	2.52340456726285	2.7339693778541	1.62065945639968	1.68825862696779	2.28047442015186	2.6608344814809	1.74651590330433	1.5064663371312
LGALS3BP	1245.0362530482	-1.51237605376878	3.40304217141648e-06	3.72411180237186e-05	10.7198639362867	10.9921376775311	21.1911843924594	17.9522951518865	6.07245321981969	4.32512995797533	14.3743642244387	11.2319993731646	7.07148064783248	8.67966588591351
LGI2	45.7384260148366	-2.00722083939892	0.000290920816815682	0.00184511658440443	0.261541404876239	0.312408817859936	0.11758983631551	0.136050243359081	0.0497254573595122	0.0509474269053137	0.357543701198906	0.447141938225212	0.054183927619567	0.127772964468653
LGMN	687.217225172386	-0.992368629525124	3.66578295837487e-09	7.48393836189651e-08	8.78645682870959	8.1023874638681	8.358402704607	7.41044512205725	4.47034763412842	3.56364953547899	8.3110236463275	8.21502987174154	4.70967578121651	4.48034247672723
LGR4	214.540904688624	-1.39640036737572	4.37343103323207e-06	4.65873527052696e-05	1.3726144177958	1.33293841085694	0.876052124355145	0.854697343586185	0.448246447018647	0.377510043860696	2.1913830460852	2.56082454236755	1.58645758224127	1.60636012035653
LHFPL2	923.855134942169	-1.12764459743176	3.92910850798581e-06	4.24705293265043e-05	3.86222211985241	3.79620041213985	5.51602384600264	6.16545184704842	2.08105190103596	2.23199011003509	5.54441044299514	5.4831770959637	2.20264157231084	2.0419400300984
LHPP	353.565902589789	-0.443554793465818	0.0138951315452151	0.046882099328829	4.15201487089059	3.80302727051291	5.03261362541293	4.90385059331541	3.26400550209118	3.1628500095091	4.9905324838581	5.16525766226734	3.92860035990694	4.28610851529236
LHX6	14.7198551958518	-5.33985435798521	0.000507488246716994	0.0029676187915389	0.1719646266477	0.103633704887851	0.0760886002556033	0.0792303622097579	0	0.00494496614841193	0.279318874047957	0.243093113909758	0.0371230692188857	0.0174398431420847
LIF	2589.75724267995	-0.571067040461644	1.72888143475716e-07	2.55976151251987e-06	16.4391077456968	15.5623990966842	16.1878329299968	14.983326304991	10.5076000470444	10.2742616940518	16.2863310223843	15.3043512528153	10.7715171513613	11.1855729511445
LIFR	1929.52873739206	-0.664563450465529	0.000420299236730782	0.00253043846883544	5.08094337214407	5.14465462718784	3.7438482224464	4.26112814787804	2.74330471635913	2.88092786632493	6.88849133627696	7.99282326033543	4.02608571235131	3.9610064219346
LIMA1	2406.86706383068	-1.49758239334497	2.17396670381429e-16	1.08507420267717e-14	12.0728617878938	12.9145605425288	15.5179791194016	17.0114863337525	4.64425400167395	5.28685317022344	15.2728780543876	18.2818927519047	6.97286997874278	6.77522899986594
LIMK1	2789.50104159775	-0.66170062107422	0.00725009034117718	0.0277754602568386	15.1928910622747	15.3705824768173	25.344700580574	22.0782767073634	12.3022406550741	11.7299673834845	18.3638704812015	16.6217174812069	10.8756747991136	11.9304948044563
LIMS1	3964.57845200084	-0.541180530877139	0.00246513045086817	0.0112960034886466	19.405010842463	18.8656766414533	14.3433204980699	16.5959448573128	12.2531938819661	11.009277812101	25.2818179405228	27.1808828508445	17.8624014291081	17.6943030965968
LIN7A	62.1337558272738	-0.885273322736646	0.0108296162082748	0.0383763089246969	0.285670599431102	0.316492660195431	0.231253984100739	0.189229783287817	0.145214507376946	0.125460306566313	0.265452533444254	0.18293706847061	0.264898456492823	0.17616932733071
LIN7C	1492.40924730987	-0.743274681758036	2.43972481386328e-05	0.000214712844632653	6.94415278216898	7.01093594872525	7.61737725989954	9.12428303576498	4.97231317507353	3.98036957983026	5.60165038774103	6.65889229586093	5.08853453754051	4.62192266130835
LINC00243	18.7835219758436	-1.95045174668546	0.0132072902899451	0.0450166590800187	0.0172666193467108	0.0309016275578636	0.0583410699151003	0.0843750298546383	0.0106748692504774	0.013270465639808	0.0421846542617221	0.0663429432075037	0.0124530785380514	0.0156007026293463
LINC00260	24.2101668154783	-2.2238875548536	9.85904274583521e-05	0.000719877638370786	0.545296459244433	0.353898942024864	0.61710838673971	0.706472455855356	0.133120224399013	0.101319447577344	0.563636609941621	0.464315118548113	0.0950787313994284	0.198517848472253
LINC00265	402.684291418046	-1.0980822080514	6.44922917099379e-09	1.25556871562143e-07	2.04219720127155	2.00262043079853	2.71081203477392	2.3522864427808	1.03378247353054	1.04313869235395	2.0354944656881	1.53358328198713	0.983237742346586	1.051900938045
LINC00294	750.476348114114	-1.03980290844981	3.9882690975587e-05	0.000329438880590186	6.81255689307414	7.2738457536956	4.46689869157896	5.04493238264109	2.7364880362464	2.87940366526536	4.87844441573467	5.91648957962903	4.81722649707543	4.31168153039623
LINC00312	75.1617936076576	-1.37824990309221	7.844002317063e-05	0.000591624472706905	0.629842037468924	0.555712459477906	0.738717653442769	0.909455270703848	0.201567562304408	0.328138841305218	1.1743993737826	1.03150271164056	0.895788532755266	0.561103444244402
LINC00346	18.8691353724937	-2.5794727599682	0.00045981882184051	0.00273147263048144	0.115613252893854	0.114990099664042	0.0458523481214465	0.0788181827445027	0.0191766039350953	0.010216885136121	0.0612081953584426	0.102154400416815	0.025566884431988	0.0240218529075093
LINC00452	1716.40811444151	-1.10804996411529	0.00388787333461544	0.0165620020025603	37.2847204440299	38.8262962401422	18.7342610087022	16.9109464783552	13.8359710518016	11.6025583947857	41.3594769099256	39.0157871365844	12.736083022943	13.7816723523247
LINC00460	233.631053820131	-1.38555439773633	1.69101307544741e-14	7.02687721139336e-13	6.90454909050033	7.2954550320771	6.3204215384367	7.25500078915663	2.59977681129363	2.59118390275756	4.19335771072541	4.80871411565767	1.8126333639333	1.32924423703522
LINC00511	83.8128212815004	-2.15339372481632	1.50092102751577e-08	2.71785483903396e-07	1.36162072222608	1.25062521639029	0.895871882457613	0.786904996975707	0.22480567696522	0.24714787985202	2.277899697166	2.79586095364963	0.900939193227475	0.592266826071193
LINC00545	3.26395624678994	-4.60315398561629	0.00922020242167151	0.0338249940403865	0.267404994437174	0.438687230218321	0.15529207758417	0.191649442811825	0	0	0.368531629577214	0.0896972388104309	0	0
LINC00578	38.2726718859278	-2.47276064375147	0.00268050304979027	0.0121096880087833	1.42966118138805	1.47699231123306	0.321936658385078	0.470497813776986	0.0595259362083497	0.264284565591476	0.919821170385026	1.18911233120211	0.281073581980716	0.207127869723505
LINC00643	74.316723046842	-2.44082110596365	2.91981805606838e-05	0.000251930824338241	0.174642799682656	0.170015505305841	0.53363366524779	0.456376970071868	0.0511615029717381	0.0681443910797131	0.369364783223583	0.351488803175765	0.112668654955238	0.0991841247453685
LINC00668	97.7098422152488	-0.638583464459177	0.00672164582188821	0.0261143721578497	1.25226782089368	1.38868112364125	1.30075222038902	1.5323199311054	0.803152532781838	0.909907660281971	1.35752656240607	1.16795947737169	0.784630307665186	1.04077318616521
LINC00672	63.8832226784751	-0.94917800969611	0.00680385583060438	0.0263698055168101	0.313855627273678	0.400596603975869	0.493524840281943	0.57619415363252	0.216724711406456	0.233265250381209	0.384303026509283	0.490759540620451	0.443267243827915	0.308503834130432
LINC00702	160.509903521152	-1.66410387821057	1.98939849169234e-05	0.000179015383172254	10.475334295356	10.3377117209475	5.64365308506484	5.1897990708335	2.53197696091422	2.36262605633895	7.30540575445096	9.04910196848595	5.2924355796673	4.47982755401988
LINC00857	149.710283517919	-1.18917416691161	0.00120602297458287	0.00621313414888173	2.4748264177434	2.22722147688022	1.26475731859389	1.36575725094961	0.706873935668057	0.866794672413764	1.79917107452087	2.17498163519971	1.16868523961005	0.855023079433363
LINC00862	302.896518149255	-2.22578201793223	0.000689500664260776	0.00385660704876527	9.9136737528343	10.3667997543275	1.82653584549718	2.71852773501601	1.18068875305002	1.42826814774696	5.5006661718829	6.38072101065027	2.79465713675807	2.60791090283063
LINC00870	3.00685883442963	-4.51565647565391	0.0138082325821337	0.0466317117940488	0.0396155547314332	0.00928438582472636	0.0460124674323468	0.0496868925808436	0	0	0.047772618648898	0.00664423991188377	0.00748304830458464	0
LINC00887	14.1744376714771	-1.79916783114604	0.00887034695493514	0.0327439017387392	0.18933421444827	0.124798415499973	0.103081365804295	0.114493527069793	0.0241422814625302	0.0500208026124457	0.477024014388029	0.41678106317492	0.194464879604705	0.126009089015328
LINC00941	511.964748502603	-1.21600264054135	0.00110508763021508	0.00576800401778037	4.80717509788552	4.49766025704422	9.32025626591362	10.275241894291	2.80214810839158	3.24944033061376	8.2166022953231	8.25498598867501	3.11326400175965	3.15219106096575
LINC00958	1206.09458535068	-0.899678536426193	8.09191268299821e-08	1.27569408568608e-06	16.6949451305655	18.2823194633274	21.6220228614094	22.4963746212726	10.0160374098808	10.6616134541778	18.2138306984761	19.6194730175478	10.7954611557674	9.9360793561834
LINC01010	18.3425504962728	-2.36516129773518	0.000649181256944588	0.00365428899875613	0.363110564706153	0.303926306095553	0.220913398438522	0.158003905324977	0.0470356896518612	0.0522075233030688	0.330641859707975	0.4524012044755	0.0685885610846992	0.0859249174401
LINC01119	35.9624660165936	-1.22139326442728	0.00245388027926008	0.0112532318168359	0.795585107416385	0.911557880973134	0.855603733246118	0.601874283210691	0.360697656429438	0.302492978820789	0.548228870445442	0.934037362819363	0.45083819950762	0.585709685161938
LINC01173	195.125035573711	-1.4622831274357	4.85383315814338e-10	1.13421334765687e-08	14.7032353436754	16.207003412468	14.1999200852394	19.5702452176426	5.05448931441655	6.37455436797035	27.445029211717	35.499511432527	13.4287936342093	12.2349368846948
LINC01204	302.043040026508	-1.04478737302431	0.00159024214409743	0.00785540691898998	1.88089953714283	2.16688123400817	1.26339317356613	1.34398232141344	0.585624231731129	0.989850217459802	0.882289706403075	0.900773118562378	0.492264088680833	0.493350500546511
LINC01279	35.1911345416586	-3.0704772190913	5.22014242151547e-08	8.55569203020289e-07	0.258312398026636	0.227625301614717	0.184014311408342	0.159214181624971	0.018737942824988	0.0291175962657069	0.555360647353606	0.519883532517953	0.0858757861847619	0.0684610431845
LINC01348	150.46460124216	-2.44326487239426	6.46150427194325e-05	0.000499759630234276	7.04166485351225	6.81845294967904	1.92562176204371	1.93565937239944	0.848641430543706	0.753563391356494	6.32031744724921	6.00971500029887	1.19204959492033	0.835263847447006
LINC01435	33.1670144748334	-1.78082680065653	0.00188777463421542	0.00906780296625997	1.73077666302378	1.63410341353367	1.09128043424845	0.717688620793244	0.504443093249677	0.238894675286386	0.894494246546635	1.56752456173569	0.420337664820635	0.456370782028793
LINC01444	192.893401558786	-2.80083203942744	6.06756202011253e-21	4.81551239785418e-19	6.56538256328929	6.04519381090964	9.14520404471218	8.84149460940531	0.921572794823721	1.21337673949932	5.55453963320833	6.77137739905743	1.42991932216047	1.22740229379798
LINC01446	157.325725079054	-0.883170415684029	3.69975726348682e-06	4.01639083335639e-05	1.11034986209083	1.15841633697146	1.09946553207315	1.2321892993642	0.612436000392374	0.605619258265839	1.02076068467856	1.00407356877348	0.66690198007277	0.653843946963004
LINC01461	7.5459543014901	-4.34400051987224	0.00706668394003778	0.0272207923785583	0.191003567455124	0.313348021584515	0.554614562800609	0.650239180968693	0.0432980321705972	0	0.263236878269438	0.25627782517266	0.108236948691314	0.0451982601432363
LINC01561	90.7225445801878	-1.14078510766449	0.000126492232599998	0.000896486985591054	1.23764457195443	1.30237522534437	0.904382980566816	0.951638612582857	0.468215961679286	0.504850350859523	0.669287327278158	0.915530437513364	0.631672491366317	0.477127380638485
LINC01605	360.412291817768	-1.22542878296566	9.53017702623444e-13	3.28595281849755e-11	4.66761129472329	4.64048700775597	4.28949483940964	4.04955184627651	1.71521465061659	1.96809652706795	3.38568332179342	3.68347870907328	3.53597234309886	2.75549521644939
LINC01615	26.0336394138455	-2.74053469175747	2.77937348724022e-06	3.10328146208399e-05	0.732834658570748	0.873678129887119	0.592117543365321	0.599439722825191	0.108341814189162	0.096203675648729	0.477543219738123	0.625235444791207	0.162500512780524	0.0678579776949391
LINP1	68.3619733625661	-1.48800242733789	3.26493677899622e-05	0.000277629928132888	2.40557103429426	2.47658195372821	2.32002621932978	1.84722354517422	0.525836342505566	1.03760880049087	2.59748196750205	3.45820679751059	1.97173814965381	1.98218875808892
LIPA	1093.08852370283	-1.65308255436209	4.90668137548341e-29	8.39328341307205e-27	11.035761675185	12.0357951147822	9.74861353494136	10.8759171806926	3.41175471539744	3.37640801405703	2.37506957837087	2.9738504525048	1.62038940730855	1.5315300178861
LITAF	1572.7247246483	-0.612915277538365	3.76672775112463e-05	0.000314071331637829	12.0268275010021	12.1569608374143	13.4735072098547	14.8354746400815	7.72320880057352	9.02127446346121	14.1820442550903	16.087871130456	12.6915158975843	11.2628009007643
LIX1L	1087.93400191661	-1.97063208515221	6.54378568478373e-56	6.78205646942379e-53	7.20760956949898	8.0189463639965	7.80609808831585	8.27184343599136	1.90719588599144	1.99015811201364	6.99766971992805	7.31598721359627	3.40111293683326	2.92928203012477
LLGL2	14.3476022687811	-1.81068665642158	0.0096356841773378	0.0349683047416096	0.12787698990088	0.0732588360771448	0.154026856973318	0.076374645116296	0.0257671604840961	0.0343204823754286	0.386742809997342	0.343156280252446	0.053677551600368	0.114316534687463
LMAN2L	646.099337402561	-0.721638016292418	2.59514824755428e-07	3.67851303086556e-06	5.61414324396103	6.57871286992949	6.45580330366887	6.50842408608902	3.55203284677238	3.88778158374287	5.11007429966054	6.10629851361257	3.95695856294135	3.76740687758742
LMCD1	631.395797139902	-0.938212649008734	4.04293199860058e-06	4.35672286748279e-05	4.7869840676108	4.33408536504484	5.73043174197023	5.69243753506942	3.01742587717069	2.22257907882219	5.85239430756721	6.08396090981454	5.58527332448906	4.76084523560675
LMNA	4667.71322782838	-1.12851404681174	8.56878870164475e-07	1.08927480616363e-05	29.520538372239	26.5582299775725	34.9936923367058	28.7847749876241	16.5722585120795	10.2195870674078	36.2111061469326	29.8422538673885	17.3340875529227	21.4132264039223
LMTK3	34.7067854260495	-3.95863038770402	5.01162912826516e-09	9.9550830739511e-08	0.233056109391476	0.247048319511524	0.224879919269112	0.169601276824624	0.00975337812370654	0.0173213053983794	0.126006389839353	0.0974185618616909	0.0203180112855778	0.0203628525182722
LNPK	989.549701806452	-0.986412666230715	5.37190330781998e-07	7.10034241413955e-06	2.62720495866667	2.67738391898805	3.30718092086092	3.79678479583612	1.60314922698981	1.45221883190523	2.6954844304267	3.08042345926837	2.21908900376572	2.25892781863847
LNX1	105.939693358458	-1.23208156687779	1.31354987519438e-05	0.000124160060359709	0.630684152357766	0.722354355036485	0.927469564649159	0.951412355185667	0.345890128609621	0.325566413221065	0.567780542001984	0.685844793186747	0.299748924953975	0.303299023842772
LNX2	358.285766706353	-0.969804361128342	1.13241190343871e-07	1.73646347490745e-06	1.82203514111369	1.988103184408	1.67661998834977	2.21011222559849	0.908501590923439	1.00839635455698	1.7682460578174	1.97543044674096	1.12713025670222	1.02740424805191
LOC100126784	40.0470119345393	-1.51192067574994	0.000408845456450789	0.00247286237459885	0.352821067814048	0.308403508807439	0.31565118738692	0.199901799135095	0.11024264944212	0.0921332232583495	0.216841290470679	0.249492186046665	0.0864583275629999	0.0880030312497352
LOC100129034	462.261600746512	-0.713371059780109	0.00812153240424398	0.0304194896748245	2.50302060619297	2.33913859250065	1.52972121243044	1.63734117808422	1.15461419121593	1.23633849722354	3.38723924243762	3.51439811725743	2.16120181864028	2.08266492816873
LOC100129550	206.588805392948	-1.16936125055172	4.29989220818905e-09	8.66767947759167e-08	0.848473390208287	0.832197997704131	1.01002977290517	1.01927379815232	0.377831066637732	0.426669167579897	0.833315930700508	0.869017964084798	0.615982634828614	0.523025937158858
LOC100130744	411.328577550736	-0.441207823547705	0.0135587184948351	0.0459671081701942	3.2855455261102	3.41439629521872	4.373751473321	3.91557730408154	2.60287977927438	2.78345846749609	3.26134185466561	3.34078211498642	2.84522829341691	2.89241039900849
LOC100133920	18.7333763604213	-2.21418228648948	0.00265153608589124	0.0119942013600302	0.22855127729673	0.123608687015588	0.398184814318386	0.330755941736385	0.0836924487715686	0.0318496784174343	0.18172171083689	0.141534104631844	0.0896637444780112	0.0748846913615749
LOC100289650	212.914108708584	-1.67025685190559	5.3423127722998e-12	1.67484357179982e-10	2.82681200739778	3.22549378331524	3.85811959970639	2.81385994518163	0.854402172464108	1.09203755897898	2.35128295432339	2.75844151387123	1.16500634576449	1.66217627264608
LOC100294145	340.783705790333	-1.17282887791331	1.14024757000273e-05	0.000109841563345424	0.361733495184885	0.369394009184997	0.234972204113356	0.254493840048223	0.131419501439211	0.133470867807045	0.349555746211449	0.382246363223313	0.241602077882778	0.22893102495314
LOC100419583	226.150741339417	-1.57132967256371	1.84147067931361e-05	0.000167241607725909	1.79224704158638	2.16017915561671	1.07862721853335	1.04968657820498	0.525310107931491	0.47693885528892	1.52956774203785	1.89089115895407	0.890205868171985	0.807143223979506
LOC100507002	31.9985941900566	-2.67001804930492	4.2529276414768e-06	4.54135346152604e-05	1.34975854334954	1.53988170607247	1.74518715761258	0.848733246738084	0.138553702945911	0.2768192049881	1.44780283048191	1.58892251607049	0.31749504949452	0.650854946062602
LOC100507507	396.335234807619	-0.394117225397089	0.00900534969847346	0.0331450295252567	8.25687451070472	8.21444093840523	7.69666633468256	7.28624892654612	5.74862950410639	5.94318774845088	7.37999410626681	8.09629606874846	5.67976672331048	6.62244448364573
LOC100996664	1260.63281582616	-1.07927230609678	0.000207210213670722	0.00137715456607486	17.5745819352809	18.667777710681	11.2506590721747	10.7357608229987	6.24411267479693	7.24983237449168	10.7461214111232	10.5572856299003	6.26688740092361	6.88773486430556
LOC101060542	50.2786873459029	-2.28128521155577	7.79299906744864e-06	7.80502008690775e-05	0.770678027198529	0.693952387581936	0.329782189788151	0.436062440982538	0.110338557522341	0.114306164786726	1.01321741161729	1.18371782730489	0.444385803753491	0.316747761640882
LOC101927056	86.7550850600882	-0.795066775196983	0.00673267851526429	0.0261399433143327	1.26062354520382	1.89799373074049	1.46418244579361	1.61533101798539	0.744726153334273	0.999624906901472	1.02662382525081	1.19169188705287	0.851463996371667	0.849727290692841
LOC101927181	432.764936436332	-0.483277686351796	0.0136050092331103	0.04610630076518	5.00225437102277	4.89956848457258	5.70981997890515	4.33923266743756	3.92971012830384	3.05196037967313	4.35926383317023	4.18326745105251	3.98806289904714	4.08992867788626
LOC101927476	83.0134090881727	-2.15510147911967	2.40855784200278e-07	3.43336412768989e-06	0.611856368477817	0.601427725533757	0.862446282262415	1.15589967174077	0.129273698183456	0.222406484810314	1.05610530302034	1.39881065522431	0.262567472999921	0.253025914830513
LOC101927623	58.5745782305923	-1.43151776415211	0.00476896114409843	0.0195860900694336	0.905220292389013	0.893080356358813	0.449384663497736	0.361010416435052	0.208511407995997	0.264501014867144	0.505561408306169	0.558312051563698	0.405408390948627	0.621892522855339
LOC101927780	189.383993117086	-1.51045918444105	6.31001546978626e-05	0.000489762830670326	1.15090477467018	1.31402061084584	0.646426840589339	0.90118450657324	0.242982982618576	0.443968190265919	0.933935426660312	1.1650788005055	0.272556586927442	0.478026694288072
LOC101928000	90.2181544428333	-0.65556519702205	0.0131728566216645	0.0449095512417002	5.24323518504263	4.84504503962611	3.95842550704748	4.54966114238157	3.20914826676191	2.57821808567348	4.68406798097089	3.76879154665676	4.07480277426122	3.45633754036513
LOC101928123	144.476108728109	-1.0117516005989	0.00225938287836739	0.0105173228359194	1.57881345689201	1.67609029727318	2.82956434620619	2.73142607643833	0.967031709710465	1.16175671562292	1.98855776663364	1.63085888746238	1.2797987598926	1.36575622438682
LOC101928433	117.913618640327	-1.94923262184923	2.57404603076099e-06	2.90160697479065e-05	0.9249502137104	0.9555721115665	0.460417002579074	0.511389872814274	0.174585881518037	0.186943178106228	0.667290434749084	0.68384171901218	0.171149770625824	0.203688897892433
LOC101928710	212.217134170508	-1.30577532700767	8.29851213803795e-07	1.05873631687249e-05	1.95941721348959	1.88190765348145	3.00579163027566	2.64700391772451	0.945337375968577	0.92872658293625	2.36159837286103	2.32892872232807	0.879902195914453	1.13379957422768
LOC101928841	85.412668869578	-2.78908364235582	4.49132711019981e-13	1.61825546737445e-11	0.229353211603034	0.245214400729615	0.374264089162629	0.248604274567174	0.0360932027876111	0.041206473895092	0.227270967735017	0.192651166823041	0.0257789223889997	0.0484421544118896
LOC101928994	38.07358849723	-1.9048848646168	0.00154294604982034	0.00765348154611053	0.617904280989503	0.946690349743179	0.321349358684264	0.356926018687311	0.112892955064568	0.178213203188292	0.91513286185754	1.01158810453564	0.125427193517094	0.261883348993402
LOC105375734	63.9859960859841	-2.27821619676509	1.07806471231247e-08	1.99731042757449e-07	3.75964842793918	4.09720435955851	2.58365260889891	2.72822581155674	0.724424018038815	0.605423764082546	2.46119541721162	2.17543391139534	1.52685748358924	1.15656707853343
LOC105376382	10.3804860627212	-2.743125908513	0.0144084869341677	0.0482354420089495	0.101433852797411	0.249608665842572	0.677423951528861	0.763326372507982	0.0689812176828861	0.0612528666008124	0.157268120729963	0.280702596561804	0	0.0720086079095656
LOC105376575	311.159464360274	-0.90490134617927	8.64039656277606e-06	8.57179881979456e-05	2.15238428702118	2.07936014323365	2.65260814552377	2.89682107107275	1.26635104843037	1.2832240326808	2.87579213249193	3.03675444451904	1.81248395801368	1.85069865188649
LOC105748977	6.96907077234402	-3.20349706876829	0.0105813200822127	0.0376554794038588	0.200053611798384	0.125026642028734	0.387262038863268	0.358446588800172	0.030233039919619	0.0268458636037226	0.41356417284226	0.469736163346396	0.125961536299118	0.0315598823942797
LOC107001062	17.6244343501625	-2.50190786447935	0.00083711361988004	0.00456911551073929	1.13092819016278	1.17178558989869	0.518504432668349	0.671892871293545	0.0809579232572102	0.21566326487665	1.16896510216478	1.04821481080637	1.07935788566964	0.422554685813227
LOC107133515	563.117725567451	-0.664289870326172	0.000434592370264235	0.00260480657751433	2.4586290547918	3.19550908241941	2.87365225143066	3.54365948205464	1.79333159131645	1.92026470963152	3.07844563318795	3.55901160735754	2.21073045517868	2.07575738121384
LOC154761	6.31616864748273	-4.10361498193527	0.0139786894960806	0.0471098948415159	0.0846553207557337	0.0297600020499737	0.147487529165813	0.053088488313525	0	0.00852013557981225	0.0437512817068318	0.0283964349221784	0.00799534247027247	0.0801298794783136
LOC389602	14.283065006422	-2.59311854008426	0.000461858126994045	0.00274173798500946	0.168709775670141	0.197695912671618	0.146964111278395	0.158700248385187	0.0382443186364897	0.0169797970111873	0.123522036727378	0.127330465188309	0.0239009034965046	0.0399227534388207
LOC400043	247.323920779181	-1.67829966952571	6.0888051462282e-18	3.6489339412039e-16	4.88165867980886	5.60657105286702	4.60124674323468	4.75345571418578	1.52955342320217	1.49709470479426	3.2097916124467	2.94489859320268	1.70903167730514	0.961637534803765
LOC401554	29.4913788783216	-3.10427080472754	0.0012260144202633	0.00629954741050424	0.541704408620426	0.392406362205285	0.0699084449938971	0.0941188178326951	0.0297690583370589	0.033042330586534	0.59951431453629	0.616702931047776	0.0620142124689335	0.0854577294298144
LOC440028	72.1839361569161	-1.53282758468322	6.34017981918197e-08	1.02390126704095e-06	0.786825600247851	0.856927519002221	0.878039729020551	0.92880733859474	0.283282668290537	0.298127323031561	0.781395493261941	0.675349180139116	0.227308520546015	0.361429618107748
LOC554223	40.7499998176986	-2.93190852383063	4.36204458857948e-09	8.76338239523169e-08	0.15005598200122	0.10059523449126	0.115515297018665	0.118174756749976	0.0118659577251319	0.0189657867761251	0.0811584776890213	0.126420694809651	0.0197751105240076	0.0445921955802899
LOC645166	378.384777474585	-1.1967650851027	1.76635140575883e-14	7.32266951013291e-13	2.06892753113113	2.14367232916457	2.41204099563546	2.14894881337867	0.973261176888818	0.897099275424398	1.90536640946334	2.27765239911304	1.3002286157508	1.27549016844002
LOC654342	327.942955696353	-0.781943749074599	0.000253883772542671	0.00164477832596708	13.0829550997361	14.7092294429756	14.7163842118332	11.8157425072415	9.01744141073595	6.44132107841915	12.6397211797143	12.2462676458539	8.21527385769441	10.3335923024999
LOC728392	36.3422728124802	-1.82238989792921	7.11044590052602e-05	0.000542567978871234	0.716423293870526	0.453336722453149	0.707291445125492	0.885720800670861	0.211125032955089	0.17305063049044	0.678809096676046	0.877146474636498	0.419511817209467	0.474687688577324
LOC729970	140.107421077813	-0.910994275015128	0.00221463514214285	0.0103472968892641	4.36312070755333	4.63439090746845	2.78394760935207	3.24113028284705	1.96114616302117	1.94497153831508	3.92919752122764	4.05145091265602	2.5679746650292	2.71189560859418
LOC730668	28.1390221560346	-1.93405731854293	0.00027262767124813	0.00175115819895035	0.265563185249156	0.168644778555818	0.198996735651668	0.138142318220922	0.0582578039777378	0.0413846854592706	0.20365755598933	0.155170619758554	0.0873801411828	0.0912218609330093
LONRF1	484.620821015868	-0.726675990777432	0.000281090692170446	0.00179374752095295	3.81683856657856	3.48616247427172	2.93791875974942	3.34102554746708	1.73045562706071	2.27754399966702	2.3806415563662	2.28228235280702	1.58442201901868	1.48510390450893
LOXL1	704.499036695369	-1.28195303386407	0.00290454675038787	0.0129165091355588	11.3547768338503	11.198033756498	4.97638023567674	4.43519941963672	3.50061372623427	2.95299939833967	13.1920239377321	11.1597838519984	5.26768470460315	5.77155872198472
LOXL1-AS1	1097.24325761255	-1.11665301653072	0.0079344762805222	0.0298585086686289	13.4454691295766	15.001922158561	5.96997204027284	5.98399104138189	4.49300817657759	4.64826122456186	10.4054465031822	12.211944749437	5.92486925888316	5.0283859034177
LOXL2	1442.69362541492	-1.50565371834057	2.65831523534053e-05	0.000231980466228156	6.89684972529124	6.6913372798205	15.189548796072	13.0532888214354	3.68476481653398	3.48667875865735	7.25455963734672	6.86501701761723	3.88175765595304	4.17200108324759
LOXL3	116.695480011832	-1.36347565862413	9.80299584555143e-05	0.000716643965999646	0.657840080531127	0.564206853834457	1.01333397917613	1.08338863248768	0.342667493545894	0.28737228817573	0.50153480078553	0.525835684206661	0.285534792674284	0.218598232778594
LPCAT3	1892.39868434523	-1.05714133293015	1.26137976855855e-09	2.77456306394919e-08	18.3314641375883	19.3711010296043	24.14001937428	24.271146240296	9.4686406268761	10.7136383645808	18.5950439129295	20.9150374866638	14.3109633858119	13.2340190866064
LPCAT4	716.48249758687	-1.01436837680016	5.31308512390182e-08	8.69185207038312e-07	8.1940663913837	8.868340233524	11.4054488847633	10.5467460666885	4.98154298851651	4.44600144046809	9.02013999017603	8.3961880773286	6.41706689515796	5.81039268759591
LPIN1	2708.81678027811	-0.733557194670438	6.71654160792055e-08	1.07678568325707e-06	10.3468888112202	11.3951789431199	9.7358991219256	10.236530369039	5.71552788696161	6.5380917321133	10.0360842321793	11.2701158437251	6.64197266942145	6.75770303333326
LPIN3	267.461849262361	-1.01830291737117	0.00111970493863014	0.00583325881541231	1.15336990386939	1.14150226077677	2.07242808678604	1.90958191440097	0.792560913492447	0.718326561385812	1.63662603757239	1.60144754593916	1.37093628429575	1.39792635068801
LPP	6734.75426612888	-0.642252926581967	0.000787877859450713	0.00433529669133732	7.45661062235132	7.66560847479598	9.76411295585947	10.9081433662306	5.56092629377539	5.62052134903129	7.75924274468282	8.72950241693465	7.21243912388971	6.7950716563985
LRIG3	560.396397901199	-0.733546564718057	0.0042550100895936	0.0178540182825791	3.93042896585433	3.99891760879285	2.68679943756739	2.63289829767674	2.06098633132043	1.84033508501348	5.08485903190465	5.52278713247082	5.53211071088936	4.0618169782055
LRP10	3837.2802111308	-0.873346657277961	5.66374094351306e-05	0.000445488623588199	11.3646155599077	11.8032438623763	17.6086045444301	15.7771876036757	7.83560974493042	7.21935872854189	13.7912820152792	12.2589253910162	8.27984735810768	9.71360496594868
LRP11	337.617576114544	-1.66761684334083	3.01793305014606e-16	1.46886636493159e-14	2.78885621616806	2.79224439355576	2.52954112003698	2.32013421646157	0.690279296738543	0.910488816848643	2.1085142985761	2.04781424149851	1.45193474566568	1.40616809334513
LRP4	556.093500059972	-1.1222779388959	1.16596693472258e-07	1.78481072309967e-06	2.02820853930712	1.9775166258257	1.5125892569683	1.58640173276836	0.875328638703505	0.722302856498263	1.34610130895773	1.57000150585901	1.07320392543812	1.17217707355791
LRPAP1	1185.28905423235	-0.482272962668011	0.00334255982990584	0.0145521526175219	2.41180000588637	2.47797594570806	3.07595257851482	2.59639065754599	2.0117019001957	1.68171539401244	3.04728106302751	2.733741876106	2.04062160951053	2.41215044322307
LRRC15	14.8004659695862	-3.28247019696015	0.000338075231918711	0.0021033006748502	0.108042421994818	0.0970640336221392	0.048801101822186	0.0516227455385388	0.00816393872576918	0.00724928707413655	0.0899614247284444	0.108723925830825	0.0136055423719721	0.0127833463031375
LRRC20	3079.71597898015	-1.08737357599334	1.45010765762734e-05	0.00013554083193494	16.7795097199014	17.7030827091058	27.7483738079595	27.0265365973531	10.3542615525648	10.1148252648679	23.3471141330778	24.4471370881947	13.5772428438384	12.7846863504741
LRRC23	444.206488992898	-0.468219131940467	0.00085213572880677	0.00464104463859242	5.80367876815496	5.62633780978418	5.77456466275952	6.27119565645362	3.89297418138303	4.38980578774339	4.9649400095819	5.62102696545367	4.71432043188832	3.38886510496176
LRRC28	315.530418504629	-0.383306518792822	0.00824247518461516	0.0308135307188064	1.17111676395843	1.15752807719573	1.22222898257297	1.13432628005095	0.869533315060423	0.884857044753738	1.02045016441168	1.25820944316758	1.0804229851383	0.951874497970536
LRRC49	626.147245533207	-0.58434592735269	0.00127003906266595	0.00648415480878337	4.56789384852028	4.62336461554132	3.55212717886876	3.89706458115578	2.77752901356355	2.64925782186169	4.08525744488854	4.97525928616915	3.06191817582223	3.31561257197629
LRRC4B	335.900664758759	-1.27971587156397	0.0128033964285249	0.0439219317901441	1.71819238901126	1.48355505653812	5.44773921138472	3.59707273454728	1.51696859414064	0.939269312382123	4.5178463213304	2.21437214513407	1.25038017155741	2.28543924809492
LRRC8C	534.481691973101	-0.770895734858368	0.00114807423979189	0.00595113857925663	1.52124389786654	1.49217484401007	2.0455660559628	2.38265437434988	1.09005063924423	1.03663698705902	1.90990098025655	2.29501468525648	1.43815321308175	1.26783408776976
LRRC8D	391.173406898027	-0.970761849916862	1.02274048795826e-11	3.1014913351698e-10	2.52094540658935	2.40656229805284	2.61119617129026	2.4169019071284	1.23867420760504	1.24336365517853	1.90086650004042	2.45272805039382	1.54074708798494	1.67407573600614
LRRC8E	488.867189929882	-1.13821161982945	6.72906722180512e-06	6.84523298966422e-05	2.61335722200282	2.86489619734413	4.34569018179468	3.97627815927339	1.5797711924674	1.47751891343596	2.95710960448472	2.80229023786927	1.31637709561024	1.77751662320316
LSAMP	71.6854856280655	-1.96259872739615	6.03629077083927e-05	0.000471215804569858	0.300633386434726	0.105029189176752	0.186517491319977	0.268995761357333	0.0634935006167761	0.0451039753015304	0.225820680111731	0.0958323908941443	0.103698260259406	0.169676929248307
LSM10	373.021656223929	-0.553729293250275	0.00232511698097547	0.0107834261878934	9.1154237585919	9.05903665422329	10.8106962316776	9.90292158650101	5.62360633585751	7.29292355943718	8.20946941830578	8.51494823658891	5.73216030322066	5.65197660820275
LSM12	459.834353201175	-1.10616287322118	8.03719844042529e-09	1.53420800998758e-07	5.30360415697991	5.459622533888	4.41786372085938	4.24344579494783	2.14747083873494	2.2622503467224	5.08140431280981	5.45983192759145	2.55399692134737	2.65949182871796
LSP1	67.9642530053313	-1.62994320268564	8.92067733487077e-07	1.1299310852846e-05	0.446690195718893	0.528194842762052	0.636732892144662	0.545698869054173	0.207120427239759	0.134871417261982	0.545661866116603	0.510804321243912	0.304904388492614	0.28828047471768
LSS	5807.46278520916	-0.480155137833817	0.00273962334858361	0.0123195813897809	17.1604937727264	16.8928622237105	15.5156368864826	13.4370879144596	11.5085014632036	10.5848102356925	16.5320440921136	15.6021869856056	12.0124547911919	13.554223030393
LTBP1	1032.86296362614	-1.6295337722428	4.37276769460433e-22	3.89110070763807e-20	4.52695705768457	3.75938647194024	4.80782445618709	5.05389362424379	1.36360154246153	1.49912241866761	12.1363480093126	12.708521831459	4.33493412654057	3.85167782090187
LTBP2	7144.12127182947	-1.06461953391427	1.06043179503242e-10	2.74357530053981e-09	20.2111576342585	19.7489110821421	24.6922996404976	22.6690327609311	11.4233106152214	8.96302226734519	26.9397741377872	23.0419350668741	13.6450595218706	15.1144165506809
LTBP3	718.712807778437	-0.698112937937826	0.00365177543341361	0.0157235169504678	3.23403459882191	3.04951200929549	4.8923719891114	3.9699395427205	2.54741974046661	2.01017396126573	4.11090684205122	3.08656172682427	2.93910965736004	3.26750161375773
LTBP4	2463.98582226459	-1.2620093115132	4.7006344302617e-05	0.000380084800490046	11.1799211920615	9.25950019354571	16.5241946333367	11.5369657238843	6.39224261984716	3.48628556309595	17.0801927458725	10.0779713882841	6.26861564417472	10.594664687146
LUM	43.3131631805034	-1.64218326280482	2.70208544441934e-05	0.000235101449112219	0.463367192629003	0.568646693234658	0.547974564884281	0.706458248550207	0.206259056842921	0.152625585610956	0.801155716472203	0.695195990780277	0.152773008864866	0.215311182534887
LURAP1L	288.801741155213	-1.65005935371259	7.10376329987012e-08	1.13268059348789e-06	3.79072259772152	3.55981990320549	2.2629923573604	2.34396530427846	0.847289373033546	1.01649018271136	2.52081114655046	2.83429936761585	1.09658648389118	1.06325126463345
LY6K	71.1410550563086	-1.38204112777377	0.000721001585442728	0.00400609490189701	0.683201314351492	0.730131312429937	1.34369571474636	1.20454172027872	0.309745759012959	0.429067410218312	0.612022379216118	0.495007756337585	0.216805742907485	0.310406037979098
LYPD1	138.544256574491	-1.48395415737055	1.06042336148242e-09	2.36501255771629e-08	1.04838900378091	0.974586366345538	0.871225238415129	0.844125252542243	0.363942120804036	0.291380670167373	1.30582073472241	1.20950016899892	1.16830564696333	0.890619259909045
LYPD6	181.491476263302	-0.997292313120131	5.95965319184932e-06	6.12977989417356e-05	1.0593574524283	1.23360781013774	0.913200084834181	1.15665866135271	0.495294109880927	0.569745500826637	1.27035624401616	1.48246132852894	1.19593285926335	1.07518980953548
LYPLA1	1578.97780439731	-0.482004033596563	0.00929311313968674	0.0340384484589177	11.9996793202631	12.4350870787948	13.1432386810784	16.4447586412728	10.4982984956149	8.38064355364212	14.0015601201379	13.7278569792308	11.3404390112705	10.0881220632244
LYPLA2	1300.54715612684	-1.50628821150866	5.80980786225181e-06	6.0001761269059e-05	16.2682348832468	14.1701223553983	31.224162397671	26.7648359788929	8.01760112952094	7.14585974562193	17.3032861793488	14.5813245356858	8.75848412398675	9.17992249116074
LYRM2	660.684563582989	-0.519794656638924	0.0105033169055156	0.0374047402963315	2.99664284584233	3.3584996954396	2.35610464263705	2.60530950303321	1.81050435342862	2.04611710407623	2.84726562686933	3.15975267835244	2.16551237110166	2.18385591345883
LZTS3	757.450151770048	-0.597688389462024	0.000369070509091065	0.00226179245206103	4.6034607674383	4.24826871497172	5.13474901741368	3.97692455091108	3.068554028301	2.7352668470877	4.98295022191087	3.67887724162753	2.88702244026184	3.67228975365187
MACROD1	65.5402405361444	-0.806653361371622	0.011052426800376	0.0389699235132729	1.37567141131826	0.97718714766213	1.61427988366467	1.28071226700027	0.733000894662139	0.736520646171821	1.4952357285949	1.12745932633636	0.675081684757278	0.926258696332351
MAD2L2	701.75067548354	-0.865823123419652	8.16527735764368e-10	1.84441053544005e-08	12.4708453730991	12.3262806081137	14.3442481302647	14.5757482861403	7.37631536014753	7.02007204082104	14.0835694284967	14.2651030397312	8.44378605754524	8.44336172916721
MADD	1679.54181213635	-0.701545115079656	2.76136514168331e-05	0.000239196127980915	5.47988400952038	6.01284163689312	7.43038200293567	7.04488048514461	3.73610967550656	4.05289641461228	4.85953669381681	5.2290748389487	3.63625731556844	3.60401847255674
MAF	660.318303768494	-3.04845722248242	2.28013844051738e-14	9.38639233258777e-13	4.09518165368552	3.85603032086556	1.81828855017619	1.90033323637198	0.366629455309041	0.325553909778903	2.46473610941434	2.56911253935081	1.27194413679702	1.34319924008105
MAF1	2367.84790248104	-0.4510681167924	0.00160244047185534	0.00791073092564281	29.4572337533983	30.8016691865161	36.0335945658218	30.1780390230452	24.0010139793206	21.1907484056305	31.2058050284255	28.5717289146015	21.5701502255816	25.5819606029864
MAFK	2645.40591307037	-0.634006024663686	0.0138609801961282	0.0467847912022191	18.2686835005536	16.7468148610422	24.710755270906	17.6145861020182	15.1054555696777	9.24842405255433	26.7707976291388	15.2190777730892	13.8594989583958	20.2185984239547
MAGEA8	672.369366554288	-0.423063363058881	0.00131121827651955	0.00666542262377323	6.15608620287019	6.52421610747276	7.22023822425484	6.94252742475339	5.04844427576934	4.72884831768358	5.3182092969035	5.982346524132	4.4461277273114	4.34882624890656
MAGED1	3639.97622937517	-1.12090915362463	5.23633184621468e-30	9.71146639983752e-28	33.0276198981938	32.5637419269262	31.2290470181599	32.0189297829242	14.2480090256101	14.6939610884852	31.2254011067945	35.7642471866414	22.1614515329218	21.3351598905523
MAGED2	3833.20213344588	-0.797084915561967	0.000614883194226278	0.00349246518345351	32.5195817410776	30.220165728395	46.6360796283163	47.8070588113015	23.3587332530607	20.7417239065158	43.6628235123837	44.0783256571894	39.5532553242331	37.5596254090574
MAGEE1	234.162719306855	-0.567471680637248	0.00502093398859254	0.0204635304448533	1.59917964789952	1.58494324886845	1.49935249185113	1.43439328989126	1.17270865841142	0.849347706319127	1.62309255933763	1.51717026466711	1.00447943737305	1.03268437657716
MAGEL2	99.8474684374768	-0.932404437902384	0.00273883525944463	0.0123195145356536	0.468694964656439	0.48992524547416	0.79970482019458	0.628724323789376	0.304637620483681	0.305573136161312	0.57449090697239	0.438260124480933	0.253845612565947	0.306229254390656
MAGI3	1128.71773366242	-0.600253738099033	0.00722918037799445	0.027707402453749	4.35244430773889	4.50603220625066	3.04232828909763	3.28837639722825	2.4814371463066	2.42108720114536	4.57028215325294	5.08048340582554	3.94515508870707	3.94334633572065
MAML3	257.148248065692	-0.802069406721822	1.50791851629002e-06	1.8036670969799e-05	0.927939464403227	0.855750839028947	0.925896244777016	0.940809791204898	0.472009017653231	0.549724820488586	0.925358020380082	0.865466375318589	0.638418340331893	0.671247401309058
MAMLD1	372.057968718152	-0.833271112801883	2.99824559671466e-06	3.32448641715014e-05	1.67265675532718	1.80529724369679	2.14298806652504	2.12549484929164	1.11755250112751	1.00563721245105	2.45308605284421	2.22582037048106	1.50908140809124	1.59365717245781
MAMSTR	34.8542756061632	-1.96082789372857	0.000314589490652704	0.00197602575251693	0.296726231234125	0.274505494160766	0.59858531876509	0.587624222375286	0.116826928677564	0.103738155371021	0.185637921162416	0.180730310349532	0.123898040259877	0.221734784758759
MAN1A1	1875.85689001108	-0.949732268225255	0.000216382475887315	0.00143378820709236	7.70954788019914	7.09598941260815	11.3104447993139	12.35980691458	4.8619202704712	4.84401486614678	14.3321928749443	15.6555315958369	7.52383516027305	7.81937992468067
MAN2A1	5506.74423817342	-0.766496854679892	5.95520083521541e-11	1.60435295895505e-09	18.0450132596953	18.5665530022919	19.2066801607711	21.6865056878717	11.3667985495934	10.8741446047788	14.595696743517	16.8727642642843	11.1358992811563	10.9868494940252
MAN2B1	1018.603305514	-0.399954173970676	0.00262211134202477	0.0118763444049189	7.82419493648886	7.02894817648638	7.87378358636034	6.91935333228799	5.58791725358006	5.39595196930209	7.63011360864733	6.69390684174618	5.84067703277196	6.5318775948935
MANBA	356.318002703055	-0.866033764195235	3.97032798896418e-06	4.2811021320416e-05	2.54671423273499	2.29403685992408	2.98921224545388	3.1140863857675	1.44265747781948	1.48911435147463	2.50436776366273	2.47608807830667	1.90387190932712	1.96464318931276
MANBAL	449.229062851657	-0.641184666475869	0.000550415158655494	0.00316816879462632	8.41868195414373	7.87301797197899	8.26649842653379	8.94849869859018	4.36997325451077	6.10709712060777	9.90691490916692	10.5317518420765	6.97545293669951	6.29407254557371
MANEAL	310.989794556201	-0.444967158063399	0.0128564998860014	0.0440696137909166	2.50737007979927	2.47693189897511	2.37244843342837	2.1157308942535	1.55298767463513	1.84328348062741	3.05429335745518	2.85229713372082	2.11341322409817	2.27286004659776
MANF	805.873148636538	-0.547279412853365	3.01164050961899e-05	0.000258587203406321	21.2331968583896	20.980976564662	19.0930238691233	19.3639572020671	13.4956774001313	13.4816414474994	23.822527457094	27.4400898790789	14.8961615782853	14.9816039851724
MAP1A	2109.18530491302	-2.36478740095595	8.32626088631649e-22	7.15611661248831e-20	6.93648121823079	7.13366123689048	4.98949792828426	5.11811261387493	0.960436738912168	1.33477895111321	7.6001802732274	8.09413915572083	1.9329205357857	1.82781324133504
MAP1B	13839.4618884067	-0.648123198432961	6.92057145917097e-08	1.10547188158779e-06	27.0235368095929	28.8090364739647	25.9654625082928	28.7957891031544	16.054044509227	18.4100373043616	30.9690192873019	34.2984947361429	25.5538605586409	24.5629470023164
MAP1LC3B	2195.11702672736	-0.448588704089297	0.000968870320643015	0.00515881721952532	20.7098623314105	21.7261932448284	22.7508323453732	25.798963455438	15.4510390326264	17.0793900513491	21.0520471965655	24.5961746633148	15.4622410269164	14.3148895236865
MAP2K3	1523.16132374969	-0.946667434019471	1.53420086103435e-06	1.83261593020775e-05	13.0403182561332	13.7727677834506	19.2887798647965	16.6341593220828	8.25694686323322	7.62480536615215	14.8282734509759	12.9502856193691	9.09554190683307	9.64229549722373
MAP2K4	985.159799093672	-0.700788685525222	1.59256368950974e-08	2.87199382246387e-07	6.04359682754126	6.19414524464509	6.03044886874754	6.92768448067533	3.681171193683	3.88580879021939	6.70360271203581	7.60562179843674	4.48113450369821	3.81005111581817
MAP3K12	1443.55818108451	-0.426165414640436	5.21209896959008e-05	0.000415905669135904	9.15837618310467	9.11119631991897	9.9148018765278	9.23497589813027	6.79446043292449	6.80809625942955	8.47926482887133	7.92982732120788	7.53218150636474	7.78800790160378
MAP3K15	3.40935848735104	-4.6703675370533	0.00928360354030564	0.0340128531454866	0.00769566139829265	0.0324642888755811	0.0223457914359552	0.0330929320633413	0	0	0.0198862308211317	0.00774420365296187	0.0043609390076362	0
MAP3K7CL	1842.05172324399	-0.5514544407264	0.00462288312279324	0.0190918470324952	10.0989033981599	9.28414653643191	12.9410064653475	13.5784618115904	7.73026104258147	7.54673204893102	14.1808691484222	16.5801184728972	9.64908220945036	8.226083346069
MAP4	8491.57189887935	-0.805622399658703	2.64367520615164e-12	8.64172791413464e-11	22.8637305319398	23.2497471695758	25.9948791794174	26.046641625206	13.0917667159846	14.3181738840975	23.5185264181648	25.4516172461179	16.2603015781662	15.2348324182595
MAP4K2	936.445280326848	-0.743767388059653	0.000953737443192818	0.00509209091261038	5.93442064884984	6.84275306789087	9.57393234640092	8.78499609693354	4.6734200902112	4.39351682424892	7.7043230151295	7.49467607903401	5.2461051030144	5.98229967807947
MAP7D1	2776.06137189819	-0.675028263268663	0.000905526171347613	0.00487754986639364	16.2490355163131	16.0026922395767	23.8839505318997	20.6358671755926	12.0826979186655	11.3743141744566	18.3285128379368	14.7736628628945	11.5848906651565	13.4354043876757
MAPK1	5810.63618105397	-0.893504132776458	3.24795768152171e-10	7.83914608092205e-09	24.4886679116149	26.6263358341157	21.7851627260074	24.5487806022779	11.9719058951701	13.6547952869861	29.0946023350432	32.6568762879556	15.4987714950614	13.9252271217615
MAPK4	19.1377118931947	-1.84160307447513	0.00102429353161131	0.00540815934475865	0.131745140840387	0.121739940818308	0.0918111945176683	0.113306258419154	0.0307181984994102	0.0318227783512033	0.0933779466834156	0.094697253811688	0.0639914392600671	0.0908546107608972
MAPK8IP1	1081.41761461948	-1.63593913447655	2.28619327292944e-13	8.51594910692259e-12	8.18762666274613	7.96226610853132	11.783785731192	9.7349545365882	3.36657398343614	2.55274427203448	8.92869923141049	7.56199498489187	3.99671828012106	4.96743686516491
MAPK9	1258.28616244606	-0.483222443043893	0.0145865339598214	0.048683489645405	5.54731970823825	5.87481045724673	4.04140368095371	4.85867249455111	3.62243804505441	3.48677554565494	4.9027143192017	6.0416725886897	4.71786082611756	4.30935556773498
MAPKAPK2	2256.72462520687	-0.816220549730205	1.63418871573922e-05	0.000150432450274866	13.8733289692834	13.8917325918276	19.1101538750153	17.9116212261152	9.60361925949374	8.35013985791672	15.9012438977373	15.6644993111648	9.73157985086984	9.46374716220619
MAPKAPK3	1592.72061814422	-0.78091301982594	2.36869355150948e-05	0.000209297952277059	10.6747146526564	10.9955043159247	14.4473018579205	14.6183606077526	7.19793737473525	7.2041083583082	11.0162087179361	11.0094612812042	8.18934553751975	7.8991592988674
MAPRE2	496.308749950093	-0.370791505944321	0.0102057116754565	0.0365476491889977	2.15166040605868	2.5221947311147	2.2742227755496	2.55270774237063	1.79367421795245	1.79125724174904	1.91440098561114	1.99980729151125	1.81341248463152	1.59231247619368
MAPRE3	268.065638033002	-0.966628424460456	9.08052747450583e-06	8.96803887742816e-05	3.09190525616506	3.11904021485047	2.4721822154162	2.89039796448501	1.21894753324849	1.66867230116645	3.68222847315314	3.59239883966368	2.26842637335461	2.06772099188999
MAPT	58.831802247553	-0.89163814461028	0.00436897792340168	0.0182756462565086	0.072382397476716	0.0625408437562284	0.0871090152446835	0.0712521164939768	0.0438868616854894	0.0337037591001828	0.0991548753876663	0.0895129474480379	0.067209063140678	0.0742912406228714
MARC1	99.1675230946552	-1.27515473170593	4.67334123710478e-07	6.275884089676e-06	1.25575833321663	1.19583551705905	1.02466462249029	1.2645616378132	0.508071425202906	0.451149345821989	1.07618465168558	1.2796752750485	0.972829641380687	1.1058762891934
MARCH8	1490.03028887097	-0.939664667705147	4.68446100705474e-10	1.09900823546335e-08	2.97503028054651	3.00335997107793	3.68159573616684	3.61866048066021	1.62697000988502	1.75080181086728	3.09745483203388	3.35616196537338	2.02305038039421	2.04726371561665
MARCKSL1	1805.60559318921	-0.99610004732273	1.20788931711563e-05	0.000115469605564857	36.1904070576303	33.7822066804304	25.0402675677762	24.3794777763827	15.1349075321038	14.1698036640658	30.990159759902	29.1717012264398	19.3764002386191	19.3640689422879
MARCO	182.403559616292	-1.44533161157722	4.74748916595106e-05	0.000383521373750077	2.02071712417556	1.78958434125652	3.68977361453397	3.40478029191581	0.97780406166188	0.973853818335368	2.30959876846755	1.77928037749302	0.583555429093222	0.717260673226725
MARK1	469.123544277583	-0.787711257694989	0.000161945869491001	0.00111501534762092	1.88762372868445	1.81778914239397	1.31487331250279	1.60292550028477	0.911563189263264	0.964046982545622	1.29987571401143	1.64440727867053	1.25174054996431	1.12976557879855
MARK3	1409.92440063508	-0.327933498895357	0.00263348936566219	0.0119217495204528	9.06500406071251	8.76309254697544	9.23833889310929	9.92450938980218	7.04739868666809	7.34350726987632	7.6629522977245	8.83250997464753	6.9255294082374	6.84760043189879
MARVELD1	1338.13483350835	-1.05017182881125	0.000328678568823322	0.00205006318237694	7.86436684288507	7.87580940256908	14.4753772659037	13.013453052221	5.04113758555906	5.12818195627218	10.3090945499588	10.7237662711266	5.3615798371403	5.56733094974086
MAST1	79.487668029186	-1.81418608238247	0.000534513642189497	0.00309891275476695	0.271587441029021	0.280059170215695	0.685560529385057	0.59951278068294	0.172382984063316	0.0830951187474153	0.939482419499092	0.765241525500325	0.254451002678746	0.390745064329908
MAST2	3662.86826957447	-1.30957895052662	1.39539978536801e-17	8.00832209068373e-16	15.8603103540773	16.6044102963126	13.5990237432466	13.5877366763529	5.91862083823503	5.84852251593267	13.7446459003184	13.9513955885837	7.36561608467159	7.62624880891385
MB21D2	1551.73656178533	-0.816021703952169	0.00289824839742236	0.0128950097258042	8.65671054162517	8.72572334534128	14.4514951914781	14.7650328082529	6.53161167213833	6.36255737960636	8.98617368229558	10.30439322004	7.52483069488051	7.46476046939436
MBD3	1587.13197958675	-0.857757452834584	0.00678888736487823	0.0263291671762689	14.8023306244401	13.6624251427966	21.2358860796707	14.7705813067457	11.7013841563564	5.68629552729991	21.6045953313573	10.7105466430703	8.82065441809323	15.4762894115104
MBNL2	1052.04924347283	-1.44081303405089	7.54028714629838e-27	1.02986293977233e-24	5.99755235675351	6.60181597323573	5.59729276473743	6.08745009480434	2.18657348524461	2.18259422447499	6.54561986218451	7.12652613315398	3.75495729074828	3.85411816587816
MBOAT1	200.740154117833	-0.651678891559071	0.00837619893682158	0.0312339151466369	0.990847594023803	1.40491377903571	0.915880401994027	1.25606281416736	0.729989981940593	0.688094673507551	1.1308578258217	1.37516378166988	1.14637249964862	0.926156104092993
MBOAT2	1388.28371875997	-1.07476359586605	6.93660932058963e-06	7.02391492065911e-05	5.26446705097712	5.32614266811802	3.44326631285395	3.8613813662827	2.14629949100472	2.01216044887784	5.78503662972132	6.69517908454155	3.07054415431456	2.60297338168109
MBOAT7	2751.51959056484	-0.749654118594542	0.00049425844471493	0.00290417419269688	1.932172054334	1.81618095773686	2.83336403128645	2.31790973889602	1.39248938425245	1.19047890897368	1.97627919842879	1.66095243119348	1.16424506804253	1.38968920536226
MCFD2	4839.58425181527	-1.20533031511282	1.84411872121366e-05	0.000167309617657382	20.176853285542	20.3008948225879	33.5407959733897	35.9628383743144	11.0236642383233	12.2002444901413	29.3703071484821	32.9564769683811	14.2023348859181	13.2861325174028
MCL1	7963.09347670157	-0.337174200197539	0.000750378449300176	0.00415099463052427	43.7317902775181	47.4478708032601	42.9825154765815	46.6432989090616	34.9309656845582	34.9756717261178	37.6921700948249	43.2303362961999	37.0551026498066	37.0712035849964
MCU	737.375087151861	-0.750226964727791	0.00480297120412568	0.0197028055053528	5.62086272459925	6.49983109253999	3.85260126902805	4.08956871136709	2.78243091981543	3.05307884554271	5.14031139068764	6.49937369741155	3.99116355065018	3.78282269045796
[truncated: 1,417 more rows]
