# Supplementary material for: Integrated analysis of H2A.Z isoforms function reveals a complex interplay in gene regulation
Source: eLife. 2020 Feb 28;9:e53375. doi: 10.7554/eLife.53375 (PMC7048395; doi:10.7554/eLife.53375)
Supplement: Supplementary file 8. [file elife-53375-supp8.xlsx]

## Sheet: 201901_ListC3_4_UpZ2_withRPKM
Table S8- Genes up-regulated upon H2A.Z.2 depletion in U2OS cells
Gene name	baseMean	Log2 Fold Change	pvalue	padj	si.Ctrl.n1 (RPKM)	si.Ctrl.n2 (RPKM)	si.Ctrl2.n1 (RPKM)	si.Ctrl2.n2 (RPKM)	si.Z1.n1 (RPKM)	si.Z1.n2 (RPKM)	si.Z2.n1 (RPKM)	si.Z2.n2 (RPKM)	si.Z1_2.n1 (RPKM)	si.Z1_2.n2 (RPKM)
AADAC	70.4331936410979	1.2395130886476	0.000825212942625049	0.0263007890327577	0.466210451073529	0.374612827797178	0.786452198641295	0.763733769611259	0.483126236922231	0.509436201237267	1.21620027195469	1.6196886211099	0.5032186904702	0.598891018585347
AADACP1	180.55927698312	1.06638976944032	1.4010480170242e-07	1.94068896934412e-05	1.70110236957706	2.17812123614992	2.12035730448518	2.14100230914685	0.73361444732804	1.33625338154759	4.61736680967572	3.88293710288754	1.4733884093899	1.59052993025384
ABCB9	649.192087447034	0.607906220290749	0.000320934806557433	0.0129611561084732	2.81838981090089	2.65492107313357	2.98215876796753	2.73574799409052	1.78021481976423	1.32740399310686	4.78459457688503	3.74025324279873	2.04161448371438	2.5447002026921
ABCC9	269.832626327053	0.678010770001951	1.64881702120925e-05	0.00111363281866385	0.522464654694864	0.515457865806718	0.51384757413812	0.552617159608667	0.0974231307643786	0.124673688005092	0.757793707710177	0.930680402689179	0.131320334818107	0.125627875037688
ACTBL2	48.4285001185712	1.59083575686049	3.03232427758001e-07	3.71540431466217e-05	0.216935571721878	0.21532863330074	0.155625560929018	0.233216931123911	0.876498460833565	0.739769767565431	0.560579608340429	0.680594653822883	0.759285681585449	0.760961401982045
ADAM10	3815.03485674517	0.359541519962795	0.00152613933474226	0.041418037137786	13.0497603562573	14.4212295670839	12.8124704456282	14.5659667897903	11.6706861127612	11.8772094772517	16.6988606886298	18.5523967122409	13.4935682717594	12.8767454841128
ADAM19	6979.63256121556	0.524368622777473	0.000787594981546859	0.0255929224122931	19.7301117047329	20.667819270203	16.7731617571385	16.602377830352	10.2721580503857	10.671208167646	26.1539486237712	27.0396853157743	13.4148167990521	12.6574511940409
ADAMTS1	1746.66622313745	0.847030617307928	1.25319370469683e-05	0.000894473847304351	6.63481753559447	6.61864322521237	5.23984162019834	4.95296990453266	1.7151643618815	2.02758709594953	9.87293937762219	11.2974935487315	3.11903621657015	2.54688454490203
ADAMTS12	5399.15966488356	0.487927459204573	4.08450583429366e-05	0.00238433028076892	8.54445219834603	9.81137839560569	9.9283887252807	10.182476004993	12.1679568768555	12.7566309366896	12.6407927399853	14.3775361984739	11.6597736039405	10.9777475237551
ADAMTS15	68.7577320106261	1.59503057052811	1.24380498514846e-09	3.38833208037526e-07	0.163291171519383	0.119223485401189	0.153185773202634	0.135035718028413	0.123861201770389	0.0986066492627839	0.444678820257867	0.423443015698353	0.355896255458491	0.338847622282215
ADAMTS2	151.883891550448	0.972636491838046	3.38603057437181e-05	0.00201987845759516	0.350413875871852	0.323900635369835	0.298843860643077	0.276607443233562	0.0799897666491858	0.100623093985747	0.699070307651621	0.527703343104666	0.227731531908596	0.316605269676882
ADAMTS8	14.6250057962654	1.95806208822817	0.000184197780520821	0.00829397444245955	0.0444341964834121	0.0374892947060237	0.0361264387866133	0.0286614321253976	0.0604359372271547	0.0912304347889218	0.156157470159836	0.129671980334122	0.0805751961012105	0.0693971292328852
ADGRB2	1872.64462375074	0.806045835249841	0.000382703023877711	0.0147530210501915	6.03299748478967	5.82919481330016	5.65217488265914	4.26631388318236	1.89874605783413	1.46042484984531	10.9340082745887	8.10902611157535	3.42431993555754	4.84352531858474
ADGRL2	2224.21202964573	0.756678527664181	3.99555185642503e-09	9.07045765184266e-07	5.74733107941378	6.25592528445985	5.17723120829143	5.73690504335063	2.7557703843492	3.05705928849601	9.26490994478972	10.1370658876523	5.7633966084006	5.14972204891145
ADORA2B	1088.09811244611	0.501466251836615	0.00155754810660051	0.0415303814068277	8.65342422316584	9.16272835529891	11.3029565223067	11.0719492425506	5.08091496877247	4.66015708485714	13.8126045780531	14.6561005589457	6.62398641964453	7.29118670788078
AIF1L	412.395441685233	1.46885024029506	8.20966412290868e-29	2.23644933481571e-25	1.48180319224445	1.43163811953796	1.45764686903999	1.43588075615306	1.93317083414779	1.58875596869054	3.79784503762777	4.26042864578807	2.81042730217988	2.50462510265035
AKNA	379.296077155047	0.449944211326549	0.0017021286447992	0.0436082282291062	1.20291018720151	1.20041904876926	1.31076691642483	1.14023249124395	0.492590708822757	0.546753775698527	1.7046175501939	1.61399711409301	0.894219521686987	0.973324404898423
AKT3	3977.73899732403	0.467801601303171	0.000371012062112973	0.0144730123036672	4.70991224366252	5.20069785449629	4.27171323618446	4.83757550102592	4.29547621157915	4.63983997947331	6.19992593008934	6.98419039695441	5.13706526132264	4.70293407271619
ALCAM	12857.647229832	0.595761446886634	5.97475483640823e-05	0.00329787501812853	35.7323228091475	36.6439688571328	29.3478390463479	34.694172630159	29.2766170138926	29.5337525150231	47.8605371441363	55.5410707349321	45.2526573119459	44.0927360900231
ANKRD2	18.6151464835482	1.96983765604538	0.000863498280228283	0.027116146852152	0.212366640188358	0.132721862219781	0.0822194983900307	0.0634180816716828	0.11232844878143	0.0142490950431407	0.426823528630128	0.546138052320294	0.160457157556944	0.134009401351223
ANKRD34B	41.5856716672495	1.11193985480516	0.000423007166432867	0.0159677878414439	0.154032525385242	0.140150576363087	0.147333440825304	0.160722531455915	0.0677804010599438	0.0711295994745647	0.36525371165213	0.287213521985116	0.189976245394665	0.167239305637997
ANO2	1478.27138105164	1.88287430279607	0.00127824374630202	0.0364622932518437	6.13863121479277	6.68431614754282	1.51024007798559	1.87901541446055	1.92232278135844	2.16783186429194	13.8150665051606	16.3512566943539	7.03730858792149	7.93979584630338
ANO3	204.384664603516	0.645645974514171	0.000858457995497763	0.0270356376424103	0.522696700265031	0.544445833345728	0.440066493516007	0.606523213366621	0.364869548170469	0.330671405275887	0.774682528819616	0.8822222991904	0.429410420084682	0.408369015008079
AP3M1	2188.50163123404	0.590596923737425	5.98031233671927e-08	9.83470572628944e-06	6.08277700931433	6.56099849116036	6.30738130243829	7.0224489461686	8.65111662388992	9.63062457440898	9.26813175573647	10.3202075185951	10.3037330567907	9.95691083743646
AR	543.015304858273	0.519170414368762	0.000461375237012902	0.0169846356958916	0.907963073933198	0.927496266140545	0.842514685546154	0.786897970578172	0.266228166068334	0.288051806465852	1.16632541931154	1.32253356356402	0.702804472156921	0.646904789944529
ARHGAP28	528.076586089851	0.756207503577689	0.00190681214829617	0.0468441494185639	1.85973219779726	1.72225273118229	1.13429758351121	1.42065217054508	2.11738415141984	1.95801526901525	2.41534470659447	2.78935546472503	3.85016432203706	2.96538503720441
ARHGAP33	682.022871448626	0.717078626212155	0.00064554907327654	0.0221205442404718	2.58837826926235	2.23850529393709	3.00633606229751	2.26443331656781	2.75470325102641	1.76117649163072	4.68514989203479	3.61153163308529	3.45230203990653	4.48593502171452
ASF1B	673.892536837573	0.673263742853258	8.75614393894862e-05	0.00449787926791324	6.98249898819195	6.95122127605163	5.56216569047866	6.21116911712502	4.80455575928846	4.57722749887249	9.30377366408101	11.2652684675839	7.33001542764513	6.82856672019592
ATF2	1935.27137643096	0.481223667233216	4.42901617062767e-05	0.0025580307176293	6.76779334643136	6.55628424387056	6.82363374710328	7.76551534559045	7.65086580003777	7.99180112962576	9.25506575927112	10.2637895687451	8.95698673506517	8.96214800465885
ATP10A	15.1418792134547	2.10140711997333	0.00184274011639143	0.0458441205516256	0.0408719899789337	0.0383153866668111	0.00791196421266949	0.0219697488893953	0.0092651501778886	0.0123406854853949	0.0880138588023532	0.147381783295702	0.0231611353714695	0.0290153141156427
ATP1A3	145.5318267927	0.806309854583628	4.58560095858589e-06	0.000378543675091345	0.595674468880078	0.607950890705607	0.636065637100348	0.645545145553171	0.431230199144509	0.487349000068873	1.10231772791891	1.07317634146676	0.326665002787042	0.443335130480679
ATP1B1	1373.89258354362	0.97607666928738	2.6269824062609e-11	1.02233398643653e-08	8.46782482384384	8.31796566387984	10.1363374277668	10.5058740014119	6.11683109028256	6.20466480675347	17.924038347619	18.9261173890009	10.2031363633012	9.45711959506114
AXIN2	416.544431799673	0.561111399126357	0.00202003107121809	0.0489872520164089	1.91665520587451	1.7533273041402	1.42864797273402	1.6212311088524	1.86779034807756	1.71958159788344	2.33380143494077	2.6408969649763	2.26295019381083	2.35048040933919
B4GALT5	2889.67732121623	0.352626198804125	0.000254805051174866	0.010543768510008	10.5747634779188	10.7016933794381	11.5070104453456	11.5468079781696	9.29455874849766	10.8266806567402	13.4876183450091	14.8654150378869	11.0915967730214	10.2486361649939
B4GALT6	377.801527302499	0.620946272816482	0.000124760569132539	0.00606908185259329	1.00321262853256	0.965428167431705	1.0449046389019	1.1993997334007	0.567531975463207	0.478929493652866	1.46825350429169	1.78084159391227	0.657375359028252	0.722691968292914
BAIAP2L1	1013.42956811052	0.385288530701607	0.00177956702334433	0.0450263513878685	4.39117375061227	5.12968641329636	5.13973052422086	5.19594538413532	3.81211448364125	3.66075170265825	6.25600014241428	6.72118274465082	3.19854438021851	3.29664040194591
BBX	3294.9427285607	0.36795683056455	0.00176468244906904	0.0447189684186566	5.99500763151854	6.69123886091609	6.59826430481365	7.08837495962186	5.16640275721582	5.92115342254632	7.89739802329453	9.15160304671964	7.10562076018055	6.80382806650361
BLM	1003.04970383591	0.457236220450853	0.00156159717252301	0.0415705305942812	3.71226694823428	4.08370760483565	3.32592706010671	3.49499397882878	4.22601700043055	4.35866574058404	4.76779690510781	5.28788524388547	5.01028111074508	4.79395332175414
C1orf94	36.5707409077553	1.88372703854219	9.26159623398735e-08	1.38881459123416e-05	0.0974448810581867	0.0989620232152734	0.150906361454402	0.116398082485166	0.368158184262594	0.339987821357318	0.447654575860569	0.408581409704362	0.343588491847312	0.368942979851257
C5orf15	1531.13352121195	0.410674385732573	9.60097509578969e-05	0.00482855193663638	11.8560098366562	12.1767508256253	11.2287768505988	12.6365963169218	16.3807408338179	15.0457824991827	15.4214572745046	16.4687433642299	18.0606864670012	17.0219699225978
C5orf34	377.56101273559	0.59648809257899	0.00159098490263153	0.0420787188244537	2.52660594822859	2.75122779314631	2.05176004598641	2.75406226543642	4.84363616101873	4.18197719866218	3.46998790580993	4.17147048238009	4.57047928623091	4.42668155402055
CACNA1D	56.6142261938409	1.35648243686389	0.000833337947421231	0.0264081489662938	0.120714319706743	0.124906838807166	0.076716839145538	0.0538685031539563	0.0402720932926981	0.082523505596725	0.223652132425165	0.258995476825826	0.141974277913737	0.119650945466699
CACNA1G	169.733146692143	1.51636765613694	3.44009302223255e-07	4.07451597452109e-05	0.166043180288395	0.224388567531187	0.328103901673744	0.287462572984956	0.390085573492934	0.362008368551566	0.766752634417331	0.668362152016759	0.647649819998828	0.707251352622359
CACNA2D1	1333.67071966397	0.748886786100607	0.000546464054656141	0.0195020850946608	3.06486565343387	3.23229800495115	2.13006596754144	2.50284814048505	1.92088218002009	1.88911037652951	4.37701604813222	4.83844973339074	3.47870396641665	3.26687322805385
CADM1	847.886424001571	0.679326499799153	7.02275299817423e-06	0.000544013733436767	3.36741231046661	3.45723989222059	2.79907431603694	3.09674793801539	1.99758240364667	2.49407481761139	4.81842105580585	5.39326592938458	5.06715109819325	4.75805808189699
CALU	3657.29952310627	0.699744123263928	0.000189046905659307	0.0084656758164421	10.1164371815352	10.8817669585296	7.95693996901557	8.6626150348723	14.7233716936435	15.1338463154706	13.9132993852953	16.7585163226024	18.2139629479353	15.9024024658553
CAMTA1	898.560237712934	0.480189391028512	0.000135376783882168	0.0064137203842146	1.77444227699342	1.51492612395917	1.69740056794217	1.78374575664567	1.40523873019041	1.50524812172901	2.32242812994366	2.41176675719956	1.7760047425036	1.61414706481587
CAV1	4775.42669615572	0.710771973253678	8.05759298013537e-09	1.68847893923478e-06	20.1370045018116	22.5596869777195	20.0603288849389	22.538980398482	1.84271122151957	2.08947124839144	32.0928787867199	37.8748920357003	7.5613973341269	7.66665293976906
CBR1	314.979373166177	0.76918404729159	7.18304290190698e-05	0.0038243269130837	2.70327453392771	2.83811117910565	2.6094160577668	2.18943779441788	2.62095055393328	2.47069964379178	4.77656261695876	4.03453768829705	3.39497314474393	3.12497806809998
CBX1	3761.59725869697	0.523537519089182	7.44580622023071e-06	0.000574064635234297	24.435513691967	24.9647975343119	22.0674143134058	25.6678476471443	26.7023947876607	27.637094269801	33.0865934252338	36.8844699502983	32.594044369734	28.2337113809543
CCDC129	115.035452146083	2.65216928991523	3.89490831784321e-07	4.54730546108195e-05	0.074864040437354	0.0657948601752262	0.253612025217659	0.184439533764661	0.165464395906534	0.139391803425523	0.870547156481607	0.947981316561684	0.742412666439106	0.611184872068119
CCDC80	1091.26934033298	1.57409172339842	1.82163994961523e-10	6.33504361201298e-08	3.39742055750682	3.17072021841037	2.16196101220747	2.29800371792617	0.823324211053801	0.93669958299831	7.61778028879894	8.87835148157576	2.15677587064015	1.90692150179868
CCL24	122.170634335275	1.322498220268	5.37202693581436e-05	0.00302778552640985	5.29858044532919	5.84916306957761	3.27838830455471	3.46033716188018	8.01494684402389	6.10027507288591	12.437942498231	9.91652806848653	11.1684495945926	5.90590599204954
CCND1	3794.75443523954	0.428495760736126	4.77757918224843e-05	0.0027304032074773	15.9191906224353	16.3767993747691	15.5642079157959	14.9289062353534	24.3599635227181	21.0785909489786	21.3652109336382	20.9467834909134	23.0589200087533	24.030425873123
CCNE2	326.053302805715	0.847378990580963	1.40658018993537e-05	0.000978321412957178	2.0469005443589	2.08745417167087	1.50392914461559	1.83494147373024	2.91745508037245	2.62218893124784	3.23107334809076	3.50760295568303	2.69043860723529	2.01485420858623
CCP110	1020.42127917686	0.378930992305924	0.00170217495320708	0.0436082282291062	3.07953143461025	3.19166154611283	2.77356318939013	3.12955406448356	3.04694109677969	2.80551736266675	3.84905382350206	4.0803916328883	3.8117397580681	3.51635270557326
CDH10	58.4758843590871	1.59224214919101	7.19156911046907e-09	1.53978261849819e-06	0.202225999283494	0.174993659523638	0.192722376679987	0.234126718967326	0.331473009520105	0.607459893306573	0.557406769575774	0.662684661368512	0.799236572845689	0.773024344509102
CDH2	4251.65841583711	0.755585336196145	1.90045373639437e-05	0.00123756638730542	17.1821676946825	17.0310387287634	13.3044362133072	13.9205268166846	16.3098657961155	17.7960632718204	24.3466020393574	27.7092121690277	30.8079334703849	27.8643059611414
CEP97	1775.55302123582	0.581737279218548	3.25748086933682e-07	3.88638867221243e-05	3.83976841095712	3.63651519135129	3.9161137464356	4.29236955628201	4.83803307602306	5.02926004816111	5.59288544821782	6.16792399983335	5.47586382824116	4.81018062452494
CHRNA3	44.5328355191022	1.67502078843842	0.000900939622309339	0.027986481445801	0.190555832885375	0.218594400430266	0.0931898074579176	0.0700827779621302	0.0136410115417915	0	0.43021273213655	0.484440783448741	0.0340999669576009	0.0355991922365855
CHRNA9	77.7249412531381	1.60688274897767	0.000426408838147882	0.0160221895621314	0.289806232986978	0.187237833635738	0.518549995448021	0.614692852603834	1.50211450799225	1.73113357542353	1.16582940815287	1.29264913575665	0.807814133759423	0.822941959725707
CHST3	3164.09669976198	0.64387404014639	3.35647208785366e-13	1.66247079624145e-10	7.47542620330127	7.6393465752714	7.75606686074579	7.38233763649165	6.74587439411112	7.20355408426257	11.7250454641768	11.9450531993928	8.79679385663864	9.15088136237132
CHST4	89.5205116670588	0.84440983552387	0.000250015982193698	0.0103718559110558	0.687734272645816	0.543299560614677	0.619283534362535	0.573203795145902	0.0105101421827197	0.10265895479499	1.02236776302305	1.16641402874423	0.0700623508361631	0.16457103823285
CLIC4	10398.371682484	1.13477729590282	8.80015642816607e-05	0.00449787926791324	40.7801662693769	41.3161450922803	22.7135969138296	27.6149817348839	51.7092168775133	44.5709025662817	67.2524510763199	78.9068673215983	59.6922459479384	55.2858104900442
CLSPN	2418.17057673861	0.552820066390076	2.96079053973224e-06	0.000257415539212359	4.54398595500104	4.80916526692704	4.16037893589112	4.39796818045521	5.98109380052277	6.74294236391234	6.30293903078148	6.86382244860613	6.87822184164027	6.31201743468904
COL18A1	70.7660558584769	0.892472680738825	0.000713627399347348	0.023611821543183	0.152076184511017	0.154853559718189	0.170541870759691	0.163489743831238	0.110553587068917	0.0538338732715332	0.338773743911985	0.25593858404506	0.0891494208959194	0.148910284925503
COL4A1	5936.13725275463	0.801471607459095	8.59627212895645e-08	1.32552894290371e-05	12.1876026442343	10.6775419214471	14.1639263679758	13.5471010756038	13.5449534929817	12.0014408029677	21.6229283868519	22.4953069804427	13.2137943800772	13.0799665844081
COL4A4	185.430020668123	1.05667123467259	0.000420335493014486	0.0159405652745285	0.327543751043181	0.31513581128314	0.182207769205551	0.216835749047322	0.44081005965772	0.416408134806799	0.518531593690016	0.56901062430754	0.697506069121858	0.604566612804607
CPNE4	165.635647143535	0.615268576644184	0.000469073331002882	0.0171905910207222	0.584232937359045	0.671658292501794	0.623552481589819	0.589886460381836	0.826842846411051	0.982121084521307	0.893583114231729	0.997077366758997	0.850045124059327	0.851921147783939
CRYAB	745.987845766769	2.01655658190032	6.22962994973856e-09	1.37599056119563e-06	8.4395401331801	7.99763046514165	3.99550799959272	4.61865295284073	31.8162555435401	31.760084124802	24.5266333234921	26.4168368846501	56.0901319701881	46.1937072448471
CSPG5	107.210836094166	1.47747640606653	3.82956552756789e-11	1.4225965579113e-08	0.454278755028404	0.454899058362075	0.583594422838839	0.562369021378329	0.346384257364778	0.332515561547267	1.48693263671115	1.37835911376647	0.600666309854497	0.742717355867234
CTGF	9876.07634869344	0.414232632837765	0.000154361921683399	0.0070673546496223	67.8308585974507	73.6521649368433	78.2977838893584	80.8886615435827	81.4439126684832	72.1906469422184	100.406387426639	100.026011764359	102.047316610511	101.913878048281
CXADR	2403.29745687311	0.545657995198671	0.000648482461363969	0.0221745728681885	7.14351484571993	7.20461717969648	5.67566657361716	6.7072645004171	2.82991839377287	2.48494608825614	9.00868369918039	10.5647615042404	4.88975782470597	4.97686402173732
CYFIP2	3721.7121825895	0.412643242674249	2.65867685521013e-05	0.00165232217484447	9.73475537260525	10.1286437962882	9.67233910461656	9.3912725791006	8.30285504229129	9.29003158106745	12.4411866146885	13.5230168136148	14.4387920169316	14.3897043002968
CYP4F11	153.838974475427	1.49145228280545	0.000945435101405274	0.0288304789784873	0.614361990164936	0.945120395000127	0.329338132137269	0.344348041576476	1.14985289558205	1.40787774358209	1.50343536661102	1.64334852842675	1.47589076428568	1.4761658570492
CYTL1	389.298923189594	1.31635924956247	2.89724997247641e-13	1.52759841290732e-10	5.94826960652788	5.23394497591717	4.36451926343789	4.99705340398466	10.5126410976443	8.84014710568058	12.7384559274441	12.9214204160481	16.066500915298	14.5645862055967
CYYR1	169.448235886848	0.903397656096097	1.57344223733295e-06	0.000153082817673852	0.856915641271195	0.724461365149689	0.683877428071447	0.796890930004936	0.314616193654826	0.253970894841469	1.37479360488108	1.50244858874446	0.571986470229531	0.552349130149133
DDOST	3348.70936419178	0.340942034635155	0.000918540807209928	0.0282741045081851	29.1554457716542	29.5248709707479	27.89316464102	27.927091901742	32.4356434412888	35.505889666656	37.0091735252752	35.5919993699339	35.286127732028	35.0258878415732
DENND2A	241.237001109978	1.17811012626017	5.25669124366668e-06	0.000421179501851627	0.812442411007613	0.798693081836714	0.584550402951774	0.510137657817321	0.713863099469254	0.577443211767429	1.48631429553222	1.58448842907718	1.09597458834842	0.995291390933938
DENND5B	3897.54803624043	0.44348852381931	0.000658053423115204	0.0223615035360042	7.1169380553431	7.52753381093146	6.44428756580106	7.09616670284424	3.01163640176579	3.34388385535724	8.78722081777876	10.4343933422816	5.68463614298557	5.36311992876199
DENND6A	505.548158455137	0.880330925048247	8.64080829693935e-07	8.88264223984111e-05	1.45815518649726	1.49072394983101	1.75584286949327	2.01606326702006	1.68655967304276	1.64089433804549	2.94318948481587	3.25051393542309	1.81742648067338	1.79318129550667
DESI2	2235.5912645066	0.594498748598953	0.00148046280104878	0.0406009471193663	7.89071052920892	8.561989886655	9.01320879988854	11.5335907356238	12.6206998459764	13.0727689334794	12.7357549234997	15.2327635050136	14.0038599045734	13.4403029429838
DEUP1	9.54117938916682	3.46548257937608	0.000523031113399225	0.0188718400629367	0.0133685786495275	0.0469963286965901	0.00776363342503039	0	0.28183496006058	0.274478068521301	0.214182236912141	0.141255494189655	0.628778074637202	0.246751656425017
DGKA	1253.17223692034	0.462465253770187	2.19799088942078e-05	0.00140886906225814	6.68731311783964	7.01571347835706	7.39437672206568	7.76635057941211	4.05570045366223	4.36950481777906	9.66867761394883	10.2410464474888	7.52615850103658	7.7714376720259
DGKK	119.186353565337	1.33548515294799	1.58654427848957e-06	0.000153444178887053	0.257455656676813	0.219923027701374	0.15370610999468	0.212110329471854	0.0621799247260298	0.0552135604796228	0.460104949870323	0.61016882656846	0.125441301043246	0.150315174777884
DHTKD1	671.189871453292	0.752736833216215	3.91632441525497e-08	7.19239579408343e-06	2.02292194373276	2.21511884915409	2.08762718827611	1.96902628612495	2.00314606952182	1.97268983854106	3.1929518222906	3.81002647506067	2.93555811005615	2.78484353851675
DIXDC1	226.176402879603	1.04115665910424	7.32791620887342e-07	7.77758379441793e-05	0.365775832349729	0.369684765142028	0.50449678962114	0.459585096253031	0.394890490891623	0.331321609800239	0.784512060910714	0.968518531397574	0.430097749437655	0.464154484774347
DKK3	2727.31063201598	0.633257593299353	6.83024524125544e-12	2.93790417021895e-09	14.7108024644197	15.2953519770805	15.542865812734	14.6202229955063	4.90215979008002	4.92102742376603	22.7536678947409	23.9863196660611	9.02260158044213	8.88223328619587
DNAH6	179.439701969364	0.962975391368791	6.32619691985989e-09	1.37868918206813e-06	0.211778346512703	0.221388520134741	0.20228224252204	0.20820064518049	0.293729518750124	0.254090486450803	0.413319959705589	0.40940357534421	0.457930974794042	0.453007024679063
DNAJC1	905.578397215493	0.503309647609958	1.10235584557848e-06	0.000111222261086297	7.45136187272724	7.21704482042574	7.51580978073556	7.91894397845132	5.47323570699773	5.92059780050535	10.5131093755527	10.8614733939747	8.64791306935858	8.50963704121915
DNAJC3	1658.31622053194	0.463782520947191	2.43743967414227e-05	0.00153822206462762	5.03148013142384	5.03508965465083	5.12918446203007	5.66275942631257	3.53447002015035	3.6005916187665	6.77607789671571	7.63653830687983	4.58940666006452	4.09702705072297
DNMT3A	941.4088949366	0.376502942370112	0.00110618343478237	0.0325190076286292	2.76358057706455	2.64153979070424	2.9987905167769	2.74099975745994	3.49174464271053	3.84736575657927	3.64109007686841	3.60381475674327	3.27160397271788	3.13735218853856
DNMT3B	1310.3660352571	0.475950541286079	2.64685447422545e-06	0.000236408941973852	4.75129968517599	4.91069815252103	5.25466353236574	4.91334532651483	1.55012566146829	1.73452110444907	6.81345734164352	6.99367239969019	2.39134303919297	2.50923559119167
DPYSL3	4759.56073269744	0.540031472286426	2.96021808234317e-07	3.66942849929273e-05	15.350411654373	14.4733497267674	13.7166851971664	14.5856495470929	4.42810644163607	4.34891544284615	20.4397894393331	21.9167849102623	8.97327696854616	8.20618615498089
DPYSL5	20.4903565345885	1.87438907167363	2.79030335132434e-05	0.00171456798035325	0.0366262599776978	0.0421386954689672	0.0464077930770775	0.0357955627216708	0.0407587004370209	0.0241281837245262	0.123899315136157	0.17088379452118	0.0528313832486551	0.0709124738892762
DRP2	176.504939971207	1.02510671564551	4.0963259327397e-08	7.35763157919016e-06	0.333097913834824	0.320479572511277	0.415973908298892	0.390406985216559	0.803915135103418	0.910458719537209	0.735199373418999	0.753567698913145	0.811802458668202	0.83208485658467
E2F7	5481.65809891149	0.338381112801831	0.00155719410926856	0.0415303814068277	16.1967653833165	16.5619793885395	17.9501520092067	18.8177653567368	11.2006224590137	11.9334048886275	20.9814602207476	23.0359883125064	15.3370555967124	14.3286593730517
EBF1	278.474333665713	0.829980319444668	0.000128509227066414	0.00617789210706039	0.950028193402708	0.882898353275195	0.69489601377636	0.696200262473347	0.205671640921	0.222331076188529	1.32856230098369	1.54815813252007	0.681794978295274	0.714104172795958
EBI3	168.439244195602	1.20791474358274	0.00133460016331136	0.037545679293157	1.48950304729003	1.36693596047422	3.13224712336292	2.19124252995051	0.55445852981873	0.568083973883524	5.44532223122004	3.97602536151778	1.97244465864909	3.04978937395698
ECE1	2262.60360039281	0.553623997909186	5.13801676289025e-08	8.65782309169496e-06	6.4229402533454	6.42753968625862	7.14608828346191	7.02859382388148	4.18836951950403	3.81294556945242	9.93114692916807	9.92188735386081	6.09261262518997	6.63548590256917
EFCAB14	2848.83222470779	0.36116899111817	0.0012228119946071	0.0351881374152342	9.04178496883109	9.45857874066799	8.25423932410861	8.96269372747517	6.60094154402447	7.19795000389071	11.141579611026	11.8424618745036	9.73951111049286	9.64689343594705
EFR3B	2865.13261076399	0.624660851500161	2.87102117727555e-07	3.60975701096684e-05	6.09356721857616	6.7495376510452	6.43165656748152	5.79800846303591	0.306962817476748	0.354062674090757	9.20367101534845	10.1684966889507	0.841183699391641	1.2751312858995
EML4	3324.66925282543	0.521544568898192	1.40086953551632e-07	1.94068896934412e-05	9.89925820082711	10.5347142807842	10.0121176436812	10.9041330166628	16.049780901849	16.4430021480773	14.0626527236621	15.6716125208082	16.2585742025074	15.0700963904303
EMP2	1046.28373172665	0.403037546521168	0.000575688770740724	0.0202793813744766	3.40815314098897	3.36481097003506	3.80363848707281	3.77418941069501	2.23173749711535	2.64227130786553	4.49799390653684	5.00859749599185	3.1768876215437	2.74223001137487
ENTPD4	2479.8256315956	0.463786510854527	0.000135041469268102	0.0064137203842146	7.53347177816333	7.75798052422234	7.09615711486312	7.16288573778639	6.50065215576733	7.26198592702375	9.37109002121471	11.0672733522926	7.96246082781206	7.72593627681569
EPHA10	158.459451254682	0.528533980473957	0.00204701548293939	0.0494445967769504	0.389118613010088	0.430187258294562	0.423899293520943	0.403897666621339	0.248199467869388	0.217151232106342	0.590826713081036	0.596811373689756	0.282853143050008	0.274332959351992
EPPK1	16.3534959776031	1.68467818285494	0.000857715310114339	0.0270356376424103	0.0100233020967267	0.00783027479439032	0.0129353472509253	0.0155647076688557	0.0166624525626838	0.0134506044919008	0.0414416775934894	0.0336217550360833	0.0479640629755972	0.0648311396819332
ERLEC1	1605.51048677009	0.390036023095317	0.000718987658051756	0.0237411177189009	10.8605230118687	10.7086868414476	10.8339580075504	12.2323114544496	10.8087450100233	10.5233705863881	13.7307291887405	15.5771657175047	13.819005006166	12.7045272198122
EXPH5	1871.16734472089	0.681715841100902	8.11738198753602e-08	1.26360579605977e-05	2.89852194459202	3.02209639775323	2.59550297059368	3.0818181983094	3.31074815860034	4.24371656488141	4.39611032648764	4.9260097296682	3.64223337593564	3.6536039513942
F2R	350.033180799599	0.926666112337338	0.000683870072968487	0.0228586019277503	1.59185790701649	1.61522876676746	0.903441141365713	1.28835876065788	2.62028882664071	2.62712177460661	2.53353809273021	2.61218747220636	4.61796337152792	4.16071655017188
F3	129.36092608864	0.903004700965231	0.00035506652418899	0.0140182665165919	0.864158778512667	1.00564680558674	0.752773965723517	0.696761451091885	0.547151062615487	0.548831316013923	1.32443460692187	1.78419915059612	1.0722679747773	1.33271593635886
FAM198B	390.679843253134	0.779619434623837	0.000428651331553094	0.0160405277450033	0.946504762663951	1.06671666922388	1.41863541497934	1.45149294965817	1.81745243762741	1.53818466432323	2.01782397221176	2.17458463014943	2.60292642568218	3.02862751160846
FAM19A5	177.781326044992	0.927996154214135	0.000322777435418077	0.0129626466385958	1.09333989409517	0.859915568589521	0.925510649496788	0.863285778431646	2.24321613657231	1.95459467909515	2.13252883365886	1.42968571908518	1.77819630190026	2.25396174629749
FAM212B	2010.87385222277	0.755733616781878	5.99246791302646e-05	0.00329787501812853	4.53228804130803	4.51691405147334	6.26585772974142	6.02669220361031	7.49710735086214	7.58895500263575	8.8236551100024	9.19850571444143	10.1602975433255	10.4667776097373
FAM35A	1173.83085089242	0.594208054291397	0.0013111425784236	0.0371434487039842	5.30426300440952	6.24641302043885	4.77473637453697	5.37770431059412	8.19492154240878	9.37101079181027	7.0182116342983	9.42556230778463	9.1526267869682	8.8588589880743
FAT1	12328.0240733957	0.342907934205092	0.00180968945536406	0.0453671382636895	15.2538936815895	16.0723509743648	14.1450004020044	15.2005891040807	15.2536703310948	16.149245260444	18.2518509581996	20.3185752829589	21.3537531502841	19.2249960700285
FBLN5	188.264977440323	0.561438612691607	0.000916257437107955	0.0282570336028859	1.2119380682176	1.24720367117574	1.24249389838202	1.18643597335084	0.699872483547519	0.834067233664613	1.64460563901719	1.96904686792363	1.38889696409059	1.13433385122106
FBN1	1392.07219924231	0.423308420273576	0.000107363767651653	0.00533392335035342	2.07308418090099	2.07273218895067	2.14403541062483	2.17459436178959	2.5252434188047	2.41722038197295	2.61863859921902	3.07095121160295	3.30834555441256	2.80055299103845
FBN2	6484.25569839489	0.372232570668914	0.000447565032972327	0.0166260237816652	10.0671680113858	10.4254545040428	11.318191704568	11.8181440256863	6.17703519008207	6.24790662839402	13.7443328281804	14.5218524825317	13.4688589415875	12.2778772462201
FGFR2	775.595619854968	0.571615683269061	1.29090670776705e-05	0.000913414291707898	1.84949508117231	2.14686805720373	2.20029706904524	2.13010873150423	1.26731267965325	1.29480575520952	2.9096129129876	3.28456828515526	2.69410944076741	2.69367968511075
FHL2	5693.03182577747	0.561395171770737	6.56229052825587e-08	1.05157488906218e-05	33.4952610219481	34.2546359959435	33.2642688916092	37.2001368753351	23.8594298299169	23.3118382735993	47.8397504232778	54.3534688587071	26.1736621380813	25.7334753275738
FLJ16779	17.9484206312034	2.79675674483325	1.11751805034872e-06	0.000112060322288036	0.0186719032512647	0.0262559222066103	0.00813260422017127	0.0100366296314127	0.0380941052875639	0.0310073590877247	0.0989119979881236	0.117435505119705	0.103163784560456	0.0828457242740649
FLRT2	3928.80339676445	0.563585029357806	1.02789472613146e-09	2.92633557434917e-07	6.75108530356083	6.84642000166349	6.59015916672932	7.10960754688971	4.87848278656567	4.69984753142694	9.60221512727121	10.6111167466719	7.78081745286595	6.89481505153174
FNDC3A	3108.60624040019	0.855134814231813	7.58799671143276e-10	2.21474654014944e-07	6.94824541449431	6.78055369590853	6.84932564913214	8.38233866903491	10.0006238568326	10.638239504361	12.2156214879266	14.0269931897011	12.4591246267869	11.2443069748189
FNDC3B	4346.91816994738	0.596898085045357	4.44651560333036e-08	7.89981494961246e-06	10.8169754983337	10.7170772886887	9.65287663628351	10.2871253495183	9.5208003216961	10.250103111384	15.295232981959	16.1366408733628	11.2784377304879	10.5138106671651
FOXG1-AS1	48.0348982286668	1.52850002212406	9.28045519448366e-07	9.48056500961471e-05	0.512156895422948	0.553985452525109	0.755011205934088	0.76236242444483	2.89355247036212	3.35445740114493	1.77139512559213	1.96243682701274	1.69670885315002	1.67807905062181
FRMPD4	69.7842536942052	1.16281086815079	0.00173016471638063	0.044117850685244	0.08423862789909	0.0858791978825841	0.132085405623866	0.160745545654337	0.0916598625513411	0.0915645332506415	0.204618861076539	0.315768188606124	0.190943701570027	0.107642873536638
FSTL1	9230.40861407912	0.664686902927421	3.19192025904574e-13	1.63037301981571e-10	39.5768676662658	40.0040974222897	38.7583143637159	40.9251414337752	15.1416826669926	13.9386799919066	59.4785097475203	67.0486860107971	35.2048192073268	33.08230153359
FZD6	1945.24124017826	0.914008746749259	0.000587387769015113	0.0206026890226438	8.98375623314652	9.33750016010809	5.4751677493868	6.38344190397893	5.86290363914906	5.99982185119842	13.4088167283242	15.1525160095729	7.5720914423051	7.51028908436505
GALC	1229.16380309144	1.00699511237359	0.000211326320769858	0.00924553830985853	5.39602653200954	5.25907193211456	3.215681683372	3.56525007631216	4.04502979375815	3.74688607594444	8.21367302118201	9.39172721294046	5.9991917984835	6.11814759000811
GJA1	1062.92609754316	1.18048995951583	5.95702427459445e-07	6.64438008750172e-05	5.25415514472116	5.71125961714155	3.56745448031796	4.11238943237745	3.57314653621161	3.70955787477479	9.95465682922356	11.2539041183425	9.59525616461965	7.69953573863195
GJB3	256.551151912238	1.28103487856335	2.30628067246485e-10	7.69309338600775e-08	1.4780037957837	1.68397916361746	1.51418579050325	1.1733639355826	0.608234261444104	0.567552602819517	3.61950707620478	3.48568351499719	0.841842934265772	1.08691054153973
GLI2	1719.29528265469	0.776470307198737	2.29406916545307e-07	2.98544598777402e-05	4.02154357123715	3.83665002643294	4.39868040707218	3.99210687493978	2.24236344478129	1.87027108506265	7.64394161510427	6.26780823715967	3.18778521068109	3.74673478084986
GNAI1	499.278178076624	0.405402913786948	0.00168658369970741	0.0434814046872519	2.56422464412618	2.32339457148474	2.55118631308061	2.36662815793481	2.94750520430864	2.58767249742879	3.23326704717082	3.27607076843378	3.93415707894499	3.50845900517794
GNAO1	435.581277157843	0.630674709969999	6.9620145033799e-06	0.000541876795513069	0.915762823307079	0.9934749845012	0.917287546502483	0.853871681340078	0.682450871824332	0.546208116199331	1.44193872483827	1.40834740729744	0.759921830855585	0.84657601984807
GNG12	6238.1081172592	0.59833609756815	2.22716115732629e-05	0.00142199019986321	21.8541467442795	23.1290497038931	23.1147684545033	27.6368146381852	12.6816391072403	12.2472668601373	33.2840315032085	39.3170523304692	21.1665548471233	19.7654482687618
GOLIM4	1541.27955504002	0.732017393624931	6.01695058200639e-08	9.83470572628944e-06	6.12223745063771	6.2046818787523	5.31637002375821	5.45228712968239	5.68768234013577	5.72219551692013	9.58165202852704	9.6351459669721	8.89509104567393	7.93784650983316
GOLT1B	1706.07699138013	0.664406433961424	1.67304242010597e-07	2.2414654390682e-05	8.84811962033355	9.08632649386881	7.66968207139424	8.93817389152951	13.1905496539277	12.0351680299601	13.3243556781737	14.101546345992	12.0904288407754	11.6962930404893
GORASP2	1560.37629862983	0.553274714221298	1.73504863925736e-06	0.000164854968873042	7.85698391005806	8.10002236500246	7.78759249712552	9.01016522867234	10.812705516269	12.4632230117154	11.3945690676324	12.6812390305957	12.5433308012745	11.5430680667186
GPER1	71.608840620132	1.31791041714594	0.000902347856955469	0.027986481445801	0.214016543244115	0.203340701871846	0.396376057861391	0.416629223503968	0.078672608746056	0.0419150861976357	0.890837326525062	0.640278797478741	0.0458889075135139	0.0821253266716817
GPNMB	2802.80898914587	0.667049536820108	0.000488340272638577	0.0177771085885914	18.3941637532826	19.1044867534391	13.4893383372704	16.0262169639824	12.9737559880662	17.9108497418789	24.9551606000767	28.4333112758445	24.6380582844117	24.4417026723959
GPR1	64.4889987957932	1.84483877440942	3.35073441081317e-06	0.000285248718462194	0.390175840939776	0.26486776164125	0.156268757317404	0.216961633371878	0.0823479555244566	0.0974960721970667	0.848318090724907	1.01544043936337	0.304969515809487	0.372501887369162
GPR137C	283.513857543006	0.963711234988555	3.88260326989103e-05	0.00228277519591255	1.36636982754249	1.10896830684232	0.900012383804006	1.00063880891977	0.486434682410413	0.459624937408797	1.90995687653829	2.38085263509168	1.3251231372702	1.19784689433103
GPR158	250.013798897337	0.645312717805994	5.58583242435727e-05	0.00313747185484947	0.572647541374514	0.579472774830565	0.674439724522465	0.676037512170204	0.720637317183402	0.959850440592181	0.934882098447149	1.02595760993018	0.840073825727837	0.889039328905686
GPR27	51.8333689120255	1.0703693641943	0.000996438984519109	0.0299389617683177	0.275087310799752	0.330212442768777	0.194821324280731	0.331798056806322	0.930818064578289	0.672571229448777	0.534003302172477	0.654921502793511	0.585519662221734	0.466782182284683
GPRIN3	12.6253153971625	2.01870145762733	0.000516537717054689	0.0187201973065607	0.0224521405908626	0.0276251404419597	0.0162984968077425	0.0120686047110721	0.0190860343321272	0.0237268070326352	0.0812254851083279	0.0762539498703285	0.0508922680664447	0.0597709989299724
GPX8	1707.30245513752	0.66146239441342	0.000146618200311296	0.00680816614797764	7.7981357934248	8.56330179367185	6.44453922814984	7.06289921238934	7.06027679808197	7.31510095546695	10.7747829925228	12.9289050661286	9.7820904420914	8.81342208875397
GSG1	646.891238539562	1.76945836149058	1.35129017919348e-26	3.15526256841679e-23	2.01747116045561	2.2458894911817	2.74075610151921	2.57555162283322	2.49083997801886	3.2342710152047	7.77652630279974	8.56791408778653	4.09664759658871	4.26255063661373
GYG2	122.295614164161	0.902233368051044	0.000864332365247549	0.027116146852152	0.55660146117507	0.716224049336034	0.426919800918682	0.513699537433759	0.328529398737728	0.405874664816458	0.917258400567733	1.15192919355958	0.654628968029938	0.648618331127679
HAP1	99.8034533219528	1.5622467971105	1.8350327430871e-11	7.49840254643965e-09	0.292762752878833	0.297672703678063	0.308648562488329	0.309892984839738	0.196033536254953	0.195829654867782	0.991627553056423	0.79317922141614	0.316488702927607	0.313350242124912
HEXB	841.070223353119	0.582357122414328	3.17000917594422e-06	0.000272704210425307	5.66923459687621	6.2643888434951	5.41217636006656	6.10258381706921	6.06918661857859	6.74977936568804	8.38534216662146	9.19424302619846	6.92266409630122	6.75099166686007
HKDC1	170.385646391859	1.18266204357101	0.00154701529406642	0.041418037137786	0.792525871287549	0.876593001559282	0.36483184396751	0.529906293488918	0.749294218967451	0.939656167047946	1.54345721793655	1.37135382729962	0.377905096000032	0.521452413037716
HSDL1	1061.28158114544	0.435984530343012	0.00154269175666255	0.041418037137786	5.1371697404597	5.69288772039042	4.67400364375475	4.98978238509524	6.09477643683827	5.72304336012293	6.63115800220722	7.25794451443181	7.29291196271242	6.83149275447388
HSPA13	1745.36341263694	0.933777693695197	3.09435940192212e-09	7.90270381631516e-07	7.20951415007065	7.25118452357141	5.80754449704307	6.30818035547203	14.2403382474576	13.3092982316852	12.0008543700758	13.4613367426994	14.081121955185	13.4619604721651
HTRA3	56.0318720826542	1.54232025000048	7.75653347734777e-07	8.12695767225956e-05	0.179218801712279	0.214951924919005	0.232647307242203	0.175669211329586	0.129049131957309	0.178252724152926	0.670156570638635	0.493308291506214	0.244935969047167	0.261941424839571
HYOU1	4886.16149336126	0.355766805878967	0.000222640699039309	0.00957647954157237	18.1879944514499	18.3067607612495	20.317547419098	19.4498174296965	14.8291562830897	15.8718158750657	23.5790379113383	25.2937711337471	17.6275599333548	16.1724476879599
IGSF3	1134.91301996398	0.763004986767239	1.42691977624288e-07	1.95991628089831e-05	2.34059965104919	2.16225958391061	2.73267711248611	2.72290255175529	1.27075321932104	1.36346356368583	4.14453477237101	4.31653424383212	2.43763336882525	2.73595364251783
IKZF1	41.899028009935	1.56134899257662	1.74487057907839e-06	0.000164854968873042	0.0750204385018724	0.0482247766776697	0.0547701608248447	0.0622163635435768	0.0670528621326551	0.116492391181718	0.177242577649255	0.181184755562732	0.145756141077638	0.133904668742256
IL1RAP	1299.19135561493	0.956556689508541	4.54230443604211e-06	0.00037687292389395	2.28058024504609	2.42741275843407	2.90166653557814	3.53203147479411	10.5518589262549	9.62951941247828	4.98927884142941	5.83038420096767	10.9010472249096	9.92962714105162
IL7R	2037.90661161166	0.614755846231099	0.00152954263821497	0.041418037137786	6.02630096159138	6.82826210513734	7.79611241668937	9.2075058394377	5.96157427294988	6.97865227647536	10.6753999219921	12.1988244782186	10.273411947379	9.92082158726582
IP6K3	18.7739835979865	1.78270370850592	0.000421368196828348	0.015942738836017	0.0884087831413493	0.0887985891844179	0.0660115101314221	0.0475220014056953	0	0.0228803215836191	0.195819144302451	0.30502780466884	0.107355103200736	0.170354051691121
IQSEC1	2088.95074670855	0.490092016083878	0.000218115327327804	0.00945626253059426	4.21227714646935	4.58038467811925	5.02309681807154	4.96521605636612	4.68640148355875	4.62711931192373	6.94259302178037	6.24161574210106	4.88845595720439	5.36791904394922
ITGA6	6350.57754189837	0.695728815561798	0.000235291493195956	0.0099633146535956	14.3654463030974	14.7800027821269	18.9134183022265	20.6440225875631	17.6036389739243	16.9281171814163	26.404257284502	29.2575064620761	22.4384319764082	21.0710019608679
ITGA9-AS1	36.6680458848119	1.04481623113836	0.0015432650352736	0.041418037137786	0.652704791913773	0.688361786547218	0.521193853066628	0.592052054453008	0.776788494776848	1.10854372706905	1.13848443919734	1.39574650780533	1.17896539077953	1.36111922994277
ITGB2	138.002614425198	1.22090135553668	3.26940281741076e-09	8.22129062316599e-07	0.514879181835552	0.607233433132724	0.553006984357708	0.678510449706463	1.06927314229997	0.949476500200729	1.43635774881802	1.30367415413918	1.09178139549499	1.12406107834483
ITGBL1	1138.56608461234	0.738130572495921	3.49926234507469e-09	8.28919464206462e-07	3.30608717388294	3.2276009513194	2.93847760711638	2.96238423246089	1.97215741537084	1.71124033233166	5.0279754052173	5.3673035575732	2.36272893734531	2.21247237636685
ITM2B	1737.02548053379	0.871147898655722	7.54059821175189e-14	4.40182420611016e-11	13.3514448699292	14.0808288180383	13.5853266184745	15.8494897852818	23.1726683566184	22.4388375726406	25.8710758948983	26.1806181211458	27.7275356323992	23.7891602120983
JAZF1	738.08572061543	0.85902054751452	2.30141446595e-07	2.98544598777402e-05	3.15970890582219	3.21282122787499	3.77348259796067	4.24156941265309	3.28951351633071	3.13634207450655	6.24395571212409	6.81912112494429	4.67368881292908	4.38334111498519
KANK1	715.904976213766	0.448908029733836	0.000459031862432551	0.0169748321073757	1.95415437989731	1.90928902040744	1.95120073587438	1.72873750684502	0.789400204209455	0.74275961513633	2.55374366971068	2.60411338481896	1.3547938261123	1.1982668967484
KCNB1	817.711312229324	1.55262829348272	2.41294071611459e-07	3.10547370117267e-05	0.964556998588832	1.10030199188958	0.559280434730982	0.692377492390152	1.30986872034625	1.44662653479427	2.24130192546959	2.64541362710936	2.58884289534655	2.47619471286959
KCNH7	13.8489277714321	1.65127370151505	0.0015666932986671	0.0416316061442941	0.0288129756185672	0.0463040253553658	0.0382463363556796	0.0354004974023229	0.0391891678847244	0.0298273598848103	0.123382789860762	0.107694676013447	0.0793054530548222	0.0584415277769852
KCNIP1	60.7474651010832	1.64124053636103	1.03452967424555e-08	2.06212042994434e-06	0.225903326220157	0.208747414813724	0.307360616990151	0.277551691255359	0.956883375703568	0.787316670394186	0.847275831938923	0.746935732309888	0.958274505912957	0.943894150999952
KCNK1	332.321656324178	0.564091494727421	0.00108087989452611	0.0320054019493284	2.55732063166818	2.26202181245647	2.81695948232276	2.86454280556315	1.67181295896096	1.374915687277	4.1440622853893	3.62773654420715	2.11298291321497	2.35424162967269
KCTD16	73.5054566304765	1.31807590846059	7.3263329074398e-08	1.16261079002042e-05	0.209810337136377	0.193462023745022	0.171781062090664	0.173789770637773	0.439746944522523	0.552487147820698	0.458620299203748	0.477646882339937	0.339141047028156	0.288124737629274
KDELC2	1205.76744661257	0.775126725851087	1.29559633312887e-07	1.82556224698202e-05	4.66454548403514	4.36695642236085	3.99607232815371	4.87236811231178	2.10915953510216	2.13256167352105	6.97141136442166	8.39338114964691	3.60873519490407	3.58734323604957
KDM6A	1464.82856251592	0.363602796351463	0.00183938287881258	0.0458392447087627	4.44174401534251	4.72659641986069	4.08534938111443	4.56861298016069	4.83305172565535	5.14699382263695	5.5683019788813	5.91639363062741	4.87418555475899	5.03663844343619
KIAA1211L	109.969210848836	0.95384944261329	7.61360785350119e-06	0.000584246105002239	0.437726793685388	0.382270008239573	0.412078572378086	0.480485809065574	0.770837026598795	0.651086783507808	0.876322303466106	0.788241436948734	1.26896562228948	1.29531741656295
KIAA1841	823.341535933047	0.387277955721632	0.00105417904466619	0.03150010326338	2.63663604675338	2.84954208783756	2.50660604423377	2.65844119915521	1.96124251647901	1.72987761559048	3.41577235484555	3.55815744659645	2.7334492969206	2.77687166983414
KIF24	1327.28024681124	0.595216565362974	0.00119745424220137	0.0346413975022679	4.00227163667008	4.0417718152671	2.9759950631729	3.38548879224358	4.17808279599622	4.58130029845766	5.25247825999321	5.66099483740153	5.07458107926771	4.79230757619565
KIF5B	7931.48560551518	0.59052181411902	1.11447318650465e-07	1.62643430655523e-05	23.1699533301877	23.9653504706513	20.9271171286802	23.1710652542061	22.0070758860641	21.9691066572601	32.9857398455	35.8575716772825	26.4106241792274	25.1176148879539
KLF5	1577.10285551867	0.380680575615118	0.00108673651573419	0.0321186361333995	7.43703052013408	7.49561231680429	7.04730829545306	8.29168834998082	5.4909619672416	5.92099879197154	9.40743583636685	10.3358781451337	7.99223091928177	8.40550199302863
KLHL4	505.453901124861	0.48248042727156	0.00175467279482367	0.0445343584338399	1.53455299967362	1.51134895466212	1.35090403955942	1.63990385736506	0.430687855442457	0.441271718739926	1.91032193982381	2.31941280203232	0.869592837991356	0.747874883463147
KRT75	2564.51106716428	1.42447447236676	1.56614680300595e-36	8.53288983171073e-33	16.4931205980701	14.9699252476517	14.849576548284	14.8449403702713	33.2153977050451	29.4434314659761	40.4084092665839	41.8643395069108	36.3866305065612	33.0532217706302
LAMA2	300.449008012959	0.53153344417086	0.000747595008702695	0.0244388808344911	0.527894025336834	0.589709854901109	0.476408492244738	0.543784531296451	0.285198759159196	0.439848922494505	0.769992313138524	0.775549794914786	0.581611668163806	0.511861435547009
LAMP1	7448.57754921805	0.589134498064935	9.19176784620514e-08	1.38881459123416e-05	47.5854557029932	48.9118990542631	53.5329697372833	48.7725196195134	79.3465418524104	85.7316101257546	77.4424241286763	72.1674319814947	81.6521359392581	82.6494673195594
LAMP3	64.6323965934749	1.51266379315644	1.76911024987505e-06	0.000166184523185102	0.314813821646079	0.240099052755569	0.210712586565371	0.17782498435099	0.304809852335363	0.18688449437156	0.650804134841532	0.703402471365846	0.592641299429241	0.590918887475774
LBH	780.558411982292	0.854273249467148	9.53455414429984e-06	0.000704966253825618	3.51321742180902	3.5408966360129	4.89097807322053	4.65098886061373	4.42353210902875	3.722748252544	7.07460310012078	7.9439147510123	10.3428054987261	7.84831327252328
LCLAT1	1153.94535654183	0.445422295659697	0.00200820745515846	0.0487728838849406	3.86002345125776	3.92799635959282	3.22557300880169	3.85606230247069	3.75512886085165	4.11205957549512	4.7730291317005	5.37659844456541	4.05411409423867	4.06767851591883
LCOR	4551.90689929767	0.618104695208275	1.39562190111618e-09	3.73958032356457e-07	7.12639561381725	7.3436104184345	6.89596771737638	7.70494861779583	8.47166894746486	8.64365892512675	10.533477211785	11.823262037042	9.31498726809014	8.97815078527485
LGR4	405.898467613052	1.09249780016186	7.22487395678533e-05	0.00383410924752131	1.3726144177958	1.33293841085694	0.876052124355145	0.854697343586185	0.448246447018647	0.377510043860696	2.1913830460852	2.56082454236755	1.58645758224127	1.60636012035653
LGR5	58.1727491555346	1.34722888937106	0.00160825926145894	0.0421942177023217	0.222245448064141	0.189558582442298	0.105792000534212	0.101837022544604	0.0891976628407153	0.101205558968786	0.331399789523756	0.461960028208228	0.251881883459042	0.24829945486413
LIFR	2898.93140254319	0.701687522775608	0.000224774753854526	0.00961765275327807	5.08094337214407	5.14465462718784	3.7438482224464	4.26112814787804	2.74330471635913	2.88092786632493	6.88849133627696	7.99282326033543	4.02608571235131	3.9610064219346
LIMCH1	645.793267172472	0.987225082787402	1.11373643634729e-05	0.000812679555897162	1.28779754635579	1.25367636669332	0.904021318060114	0.914996772780432	1.53983475716708	1.63589888283333	2.0499519653847	2.28871385034554	3.06110817014036	3.18612366806936
LIMS1	5646.76296069467	0.595932236381362	0.000635909253564053	0.0218819721042199	19.405010842463	18.8656766414533	14.3433204980699	16.5959448573128	12.2531938819661	11.009277812101	25.2818179405228	27.1808828508445	17.8624014291081	17.6943030965968
LINC00511	178.60366428127	1.2333447270164	2.5353036430149e-05	0.00158772176417925	1.36162072222608	1.25062521639029	0.895871882457613	0.786904996975707	0.22480567696522	0.24714787985202	2.277899697166	2.79586095364963	0.900939193227475	0.592266826071193
LINC00639	32.3994858647965	1.64879396527151	0.000181085872215131	0.00819902654115324	0.0828007414265905	0.0407512522265045	0.125022264040515	0.0979165755192791	0.13514295224636	0.125002221378225	0.269594666318677	0.27913214121221	0.328447777419066	0.434978146849909
LINC00704	112.888699462454	1.42280147826474	0.000339713735079333	0.0134895633889742	0.639418925005198	0.68334145309679	1.23283045810484	1.56729099573516	0.4174501810422	0.664136622839296	2.63048042632229	2.89553496877288	0.753672870849127	1.0167987360774
LINC00707	154.165272851685	3.47102380012816	4.75452459767554e-50	7.77127045490068e-46	0.278728332963829	0.212300939705469	0.2158239514742	0.199764891530241	0.244838383870218	0.224420926229947	2.4308682406966	2.63540421521201	0.881878461432809	0.733772405712995
LINC00887	36.1985968976269	1.73657785854025	7.97047050132739e-06	0.00060594094186432	0.18933421444827	0.124798415499973	0.103081365804295	0.114493527069793	0.0241422814625302	0.0500208026124457	0.477024014388029	0.41678106317492	0.194464879604705	0.126009089015328
LINC00969	318.243947148061	0.518552475467599	0.000604582144028273	0.0209553926813914	0.704071660885112	0.6633644286736	0.806747849861027	0.7543648280891	1.40580419345386	1.40863673460257	1.06589932756707	1.03533515009912	1.47232955737546	1.5482808261832
LINC01173	354.859125999686	0.957205403556574	2.02817849384175e-06	0.000187291398202505	14.7032353436754	16.207003412468	14.1999200852394	19.5702452176426	5.05448931441655	6.37455436797035	27.445029211717	35.499511432527	13.4287936342093	12.2349368846948
LINC01279	83.0522139071495	1.37125729577034	1.79969558321794e-06	0.000168091567472556	0.258312398026636	0.227625301614717	0.184014311408342	0.159214181624971	0.018737942824988	0.0291175962657069	0.555360647353606	0.519883532517953	0.0858757861847619	0.0684610431845
LLGL2	36.8194881657198	1.747210996193	2.68385299439783e-05	0.00166165065126638	0.12787698990088	0.0732588360771448	0.154026856973318	0.076374645116296	0.0257671604840961	0.0343204823754286	0.386742809997342	0.343156280252446	0.053677551600368	0.114316534687463
LMBRD2	420.721923416304	0.449792038460068	0.000247019178613663	0.010338562376394	2.31855633113068	2.28452681785435	2.26437629347323	2.30310884318196	5.46060817217319	5.73345375655853	3.13086803008136	3.14231290735337	4.51895669626261	4.23805249263981
LOC100128770	22.838403338019	1.42801986545377	0.00131348506276555	0.0371434487039842	0.122342154317661	0.0573447359762511	0.0947315505960081	0.100208858986575	0.0554667601662553	0.0914689457295465	0.277000898048232	0.23450258512531	0.0330134484025793	0.0413578850983861
LOC101928782	114.934281756651	0.914755692544712	0.000552778899803231	0.0196416763419213	1.43602356654626	0.979053216342178	1.5499724586649	1.74652055288238	1.32184065666461	1.59419431857354	2.65378756855845	2.75879221076834	2.79472674678954	1.97710208730706
LOC101928820	46.0882565730219	1.04082207393615	0.00101997105292516	0.030573888574199	0.174469063130394	0.227809816461304	0.28225054297018	0.261248803553345	0.457648546955212	0.556885114698962	0.457283217406189	0.514168023939555	0.459026556258163	0.336182794773879
LOC101929188	26.9332238027846	1.17962115822559	0.00180581586005249	0.0453671382636895	0.182246278736612	0.151432129390286	0.202052889050036	0.160301578560077	0.236610064277985	0.200096492659717	0.351064052338888	0.441817254363647	0.187771658200544	0.317563983906009
LOC102723927	36.3459842447711	1.0625696774739	0.0014619934009484	0.0402750415487953	0.0711984624205481	0.0847146725021115	0.0954175591915026	0.0735980963179053	0.104287733400148	0.115754745216051	0.181152260314452	0.157073505750985	0.263803315806786	0.155520895116512
LOC284080	122.831548345495	0.780046763813455	3.97579159521892e-05	0.00232918686823847	0.809358451382419	0.722444708272233	0.784736910018706	0.779308827857008	0.746647471461385	0.62899657053049	1.28033096734287	1.38812939651358	1.18848414249285	1.37896626287773
LOC441666	523.109316742609	0.918291365951711	1.57177429129203e-05	0.00106600210751736	1.37563095772114	1.36610517141785	0.988497836596431	1.0588049084935	1.69994015512004	2.15917964023479	2.09688466611265	2.44543140188774	2.09595004081423	1.82014431779338
LOC81691	219.435190723884	0.570622370426267	0.00041554588864359	0.0157955756973941	1.25924789624154	1.38880009566544	1.31919401087199	1.21439917017189	2.22487118217335	2.17689464064203	1.8184126459402	2.03123248552707	2.34363476159862	2.43644914788747
LONRF2	361.081168575982	0.472900484387608	0.000708604719765155	0.0234931929909969	0.465152448632807	0.470292315316609	0.42268497253119	0.461490535810534	0.89409564994028	0.891424696913951	0.598678466679487	0.666668666834284	1.09212056337181	1.05705189190651
LRRC37A8P	119.462337101705	0.948462832514062	2.21365855006038e-06	0.000199901928180866	0.141484124040833	0.128949803121199	0.139985019966134	0.119710483825729	0.215599254841246	0.249985336008915	0.253216544425849	0.259705409254187	0.305854752131832	0.355262044747248
LRRN1	1308.55815216619	0.570699614190139	0.000668739363688821	0.0225372059783377	3.83843119217731	3.82322738287034	3.13470070099415	3.48174412285502	4.2263096829384	4.35643595588984	4.68782623973578	5.95778199468194	5.22746429544078	4.7240219348682
LRRN2	198.921975235453	0.885146655153298	0.000129511968462855	0.00618968749861218	1.15307007228224	0.920059172883533	0.840931828073125	0.772594023368971	1.08687960418611	0.978064914000607	1.61870090006839	1.8025798894515	1.3554582984929	1.30971613026369
LSM14A	2786.41029209399	0.43434172525939	0.00162154644400203	0.042406682603541	7.03585478209098	6.89133168826569	5.82928219159799	6.3908538362131	6.44720777917033	7.03417110714329	8.43941337737432	9.27632016632517	7.90449025401216	7.70262665440483
LTBP1	2294.92770946284	1.45099480610061	2.06193339096101e-21	2.80852510627148e-18	4.52695705768457	3.75938647194024	4.80782445618709	5.05389362424379	1.36360154246153	1.49912241866761	12.1363480093126	12.708521831459	4.33493412654057	3.85167782090187
MAP2	515.680431071667	1.63672555197452	1.3181866378819e-05	0.000928696577421539	0.774543782065162	0.830659286370803	0.364820044112711	0.422093076570243	1.08988459395084	1.35790780302502	1.73400606568516	2.00604296228354	3.23421408002636	2.99505779897997
MAP3K8	101.794032315152	0.763288990553783	0.00145980098655229	0.0402750415487953	0.433275334766554	0.472978145787947	0.642291078804585	0.54546851327958	0.403210328368338	0.440660213320075	0.860339269559852	0.917912261571407	0.723656478192004	0.736585652989869
MAPRE1	2948.12194026489	0.491018973062605	0.000530763301009491	0.0191086479185025	17.3852325777174	18.502227061765	21.1081975071837	21.4811041504677	15.2247964283588	15.390570870796	25.2970338945396	29.9492343691099	13.5798925789757	12.7954327304466
MATN2	220.063857221474	1.40487641951424	5.729953048876e-08	9.55674312080389e-06	0.718210057001522	0.853629142733834	0.481641295784637	0.643427385938982	0.598904195587542	0.629905678283606	1.67032321319169	1.90579744810652	1.60374107189623	1.22002785652822
MBD5	410.102799765142	0.563888320034936	5.21130577015099e-05	0.00295759697267771	1.2238282657641	1.20005625287686	1.14610509387253	1.08312517546577	1.37033665646305	1.62479948554259	1.6662334315991	1.78022777825224	1.94788125747665	1.8638271902151
MCAM	2403.90599900113	1.28442270187611	1.95179190308075e-44	1.59510193279275e-40	9.38967117321409	9.23116500562304	10.0172400586508	10.0023523724419	12.1088950473737	10.3710276378595	23.1217098328681	24.0125861401274	17.8636443050202	18.7325898341547
MCF2L	351.074774654183	1.19855938068556	2.43572016457744e-05	0.00153822206462762	0.792100289495065	0.757004133560568	0.550900900480406	0.476765276118283	0.548353420598757	0.501239451480973	1.66689841766998	1.29349217600781	0.690765893115775	0.861995819360696
MED13	12849.6712924138	0.437259031471925	0.000293781822487378	0.0119449350461597	21.7177657211628	23.1611047927428	19.5204540524979	22.5492555121071	24.8052833401158	28.1201404219796	28.2306145103271	30.7619101854407	25.1679262098544	24.5709230659605
MED28	915.273162712388	0.460898258233417	3.52727926739955e-05	0.00209648653184166	6.27742718770642	6.53397378341645	6.91051907489569	7.18885545718543	4.96281538329653	4.89245118627441	9.25947264789866	9.27695753110388	5.88235112965657	5.26520083072085
MEIS1	430.285269264751	0.575174312483012	1.54065303215443e-05	0.00105363907157172	2.331352356405	2.08833010298388	2.35631277734338	2.42800142889549	3.43008617006932	3.50604784409812	3.30763219881466	3.56984295297094	5.63381087225707	5.38684828214515
MET	4001.95257267843	0.366941028797258	0.00097662375796112	0.0294518732912814	10.1645173324072	11.0936194308342	9.97744030638257	11.01984296168	5.19323181180672	5.45184542117564	12.747746134206	14.5587535858685	6.34483727299256	6.250047130684
MEX3C	1939.30145033135	0.670615146338769	5.5109071149893e-09	1.23391475060959e-06	7.10583688742595	7.95852531885344	7.45341985121513	8.4673703608315	8.98575288600806	9.33052553966274	12.0159817900538	12.6684897885326	10.3850329718117	10.217294769994
MFAP3	1637.45030717436	0.857069796771273	3.55771352649503e-12	1.57164398893409e-09	4.69184221440459	4.38898238987064	4.71356673949209	5.30208615635409	11.3297327427619	11.7398176783934	8.162017385324	9.17106448443351	9.71284552665784	8.81103980375516
MFAP3L	606.796158932052	1.28322926996178	2.10686524113446e-16	1.81245854559699e-13	1.15518174422795	1.20452287264778	0.960803994571657	1.1418981079123	0.848841157874971	0.922223966828376	2.53479333358298	2.90863369124434	1.53390162322561	1.38300222689793
MLC1	19.9856180389246	3.11120732694706	1.56262448212663e-05	0.00106421238168166	0.0512515561930376	0.036034271768224	0.00496061579888741	0.0137745167330013	0	0	0.242803541288294	0.21919306082089	0.00484049602836093	0.00606397356976816
MMP10	69.7766323880072	1.16439219105728	0.00151663923781214	0.041316612659788	0.466197829983324	0.342028539762517	0.706274372184971	0.708198623238695	0.0551379147596008	0.0979210124397296	1.03708446072041	1.46860743475862	0.298641268323958	0.187062725322774
MN1	480.305681269062	0.758762165116496	1.36937052292056e-06	0.000134026114952914	1.02630291671229	1.05831676956549	1.0906343193665	0.913099515778946	0.834329471153912	0.64682329969721	1.8265629337833	1.63344892275216	1.70062077139131	1.89598207186344
MOB3B	631.539139936196	2.81556055277477	6.9711355784394e-18	7.1214506893495e-15	0.71034787794294	0.895142853997755	0.406179022851061	0.528688118101587	0.263835978406582	0.227677609211158	3.91406006585454	5.06703482383522	0.885580061425327	0.876673073368273
MVB12B	329.304736670169	0.705588988042465	2.96338061735479e-07	3.66942849929273e-05	0.820147468145573	0.778734728198202	0.823936269628044	0.762628699946465	0.674322015816639	0.662473311082632	1.28931553838774	1.3136134086143	0.714321164341489	0.906104765475056
MYBL1	534.16669853198	0.828277787577548	0.000155665179956012	0.00710711554855031	1.87471914435923	1.8540160290979	1.28014270427629	1.45435054830237	2.23695380382146	1.98218853768657	2.7575989616862	2.99912185236726	2.87575621766905	2.65687769563091
MYCL	108.883814679598	1.86859803893723	5.3999899352756e-18	5.88418903280532e-15	0.212440512647859	0.248096191599939	0.225833762594633	0.23999728245472	0.186100206946134	0.182645136260916	0.770410496086479	0.92034331075942	0.522347302376177	0.557241324811784
MYH14	845.746893612268	0.68222008040904	0.000806963482103722	0.0259642088877664	1.92145756998162	1.9185312895626	2.35454423188962	1.86880388390003	0.757715562985452	0.598066183616265	3.72956994920806	2.73036733878974	1.15168790312748	1.35490154827525
MYOM3	120.883616616075	1.02097124082786	4.45702887865924e-06	0.000375516170214873	0.347319130705755	0.315509042423029	0.25346523007991	0.310604269384683	0.0125414989735523	0.0334092143951155	0.648107348566824	0.600043597559434	0.0801202240887424	0.0654595491729628
MYPN	36.0778354526169	1.27254369986115	0.000357899805461851	0.0140947589978638	0.0884577435466952	0.0894030639968223	0.0545813887203369	0.0683507083993175	0	0.0233699299536826	0.180008471572061	0.183594906543292	0.0187975472994683	0.0156991940953402
NACC2	1320.37501472732	0.831827670721233	1.66774535822008e-06	0.000160348811059455	2.9276693114685	2.79419775154071	3.42742528098029	2.87793626254604	4.48808360136795	3.33613262940837	5.95879160448444	4.73774080627932	5.18943271611172	6.08286426696507
NBEAP1	46.3628957105981	1.8386394042858	9.79188085481194e-08	1.44187650965677e-05	0.585558381979213	1.05211744473633	0.86903109110363	1.11912083393767	1.19464643507195	2.04302900680593	3.26163942235308	3.17541319876343	2.72830848769345	3.1407842084935
NCAM1	3338.38970935656	0.334426075587816	6.90762354267954e-05	0.00372624114868307	7.12912732911742	7.09378469410985	7.13417182975322	7.16072622022371	5.88329213019125	6.17859109266143	8.66116319541147	9.35367476841036	9.29768971237403	8.14512190295562
NDST1	9907.18363131244	0.626817274181589	9.64796894383264e-06	0.000707157185591679	21.5496201785254	21.5963476100814	19.5812896662256	17.8518941627925	6.22372394397769	5.63890973123907	31.3131011063875	31.0366393376617	8.18035714258839	8.93511183511868
NECTIN3	1677.78083118484	0.697548115861234	1.0896055701905e-09	3.01857678724809e-07	3.77074528042285	3.99414522469956	4.03458245713978	4.29467323242988	4.9833560312588	4.73032671584694	6.03355394133137	7.04361302279835	6.95231083383702	6.83371794055725
NEGR1	1420.05207632946	0.518002325087306	0.000730908709347473	0.0240031449259412	4.50313343957233	4.62532412174849	3.67068943310616	4.53346097743267	3.34469469891479	2.98136361774487	5.83773863750816	6.60427367780453	4.3837014322677	4.00940219806503
NEK7	3470.93652789407	1.50159243238932	8.36970046879312e-14	4.7173363504284e-11	12.0500508141824	11.2902355889406	8.16298142577004	9.73553195697051	6.34339224462554	5.26275083162812	27.8940627178784	30.699379265661	12.4980670279767	12.2083432189407
NES	905.831123889902	0.943960336805045	0.00179645939824138	0.0453134704695298	3.42234771577863	2.70613620655932	1.79190330617695	1.91373588989858	0.820154161014839	0.654666185880057	4.81385323988947	4.68659196663353	2.1156642867622	2.02652148753049
NLRP10	263.417996777975	1.4316558360789	4.91174763159933e-10	1.45968209160893e-07	0.736908152986931	1.03001527887187	0.743146905930849	0.792214280930071	1.99856857405272	2.40351548445388	1.87914642804223	2.5799057301416	0.845176965688607	1.03374238545422
NMNAT2	152.798294999021	0.854414828332285	0.00010685449611595	0.0053248071311439	0.476211265028329	0.386997036198048	0.398668299782432	0.38895030024256	0.967352392640577	1.06064677559284	0.642453231092974	0.858853006476286	0.886673078380185	0.799064470736971
NPFFR2	860.21599201444	0.657863376747017	5.97225462906579e-06	0.000473866514136312	6.08549272762971	6.16204194345048	5.15737946516096	5.90834337782475	6.22756180145822	7.56068968752943	8.51730920133535	9.92566423749562	7.51574271734865	6.83159982630475
NR2F1	92.0439163322784	0.908290558060806	0.000211552849671893	0.00924553830985853	0.411465906630828	0.329662974935936	0.38343722860289	0.385767799540711	0.455524117307411	0.485387047572621	0.796210310814968	0.625906658365863	0.645277353801139	0.672515175078105
NRAS	5498.62797493541	0.745681602970731	0.000137615124500681	0.00650092257214922	21.7093951478406	22.8222043560881	16.1963058914309	18.9411954929873	40.583885205615	38.5748660146566	30.0642046715044	37.0106837642142	39.4014246629501	36.4435580797489
NRCAM	40.5744975648851	1.01518655999088	0.00159672997960259	0.042094437930007	0.0933350765923818	0.0824970109182866	0.102211689060636	0.0802720179316546	0.0398976631519639	0.0354277051177324	0.157115204830974	0.206632382599946	0.081602725714917	0.0567936253108728
NRG1	37.1340771780373	2.729398337804	2.33949797355833e-11	9.32660838483194e-09	0.0132235509534687	0.0232432468491063	0.0268779364695211	0.0319859988003047	0.0157374396021086	0.019963266212504	0.14351718537082	0.17132713208112	0.0693144669103389	0.0680593180089158
NTN1	656.525413175531	0.731089220615507	0.000425626384100636	0.0160221895621314	1.47011367448945	1.52832155640146	2.13176673517179	2.03752262848313	1.71854063865562	1.3415807773562	3.07934977686704	2.86537030932885	2.51450029274143	2.85673652285903
NUAK2	152.41001222972	0.981666571084355	3.21589465076511e-07	3.86498515196733e-05	0.637975255858256	0.736645916323212	0.608456981320966	0.66912810990454	0.733685596047595	0.58884374901293	1.377838650005	1.23702331091487	1.2109605664853	1.19301313942228
NUCB2	1630.4202773482	0.5781830446115	0.000128928436427861	0.00617986889564045	15.4259961347892	14.9010866770722	12.4757854734287	13.2844601118678	18.3294272087053	18.1509301498526	20.0033370585708	21.9905838136763	21.3090693518048	19.3260894813975
NUCKS1	9543.7914986753	0.980688888218593	2.17474864414173e-09	5.64226453785661e-07	24.0294937761045	23.9160550632636	18.6203145007587	21.6228246662538	14.2915658167058	14.7288601333912	40.5390493828709	46.774667788088	26.2711257271181	23.2435409093039
NUDT21	2748.71001002768	0.430608868417668	0.000140473910793678	0.00659783354000765	11.0068677083965	11.31380467314	10.6229600610486	11.3111005389961	11.4604693819737	10.5038172479916	13.6516425070297	16.254189905607	12.7222009126618	12.3252691422137
NUP210	967.249872122411	0.54378089886213	0.000443558361364512	0.0165147184886172	2.5424744199169	2.41357965571202	2.22338268683218	2.02869762576891	2.21680158049906	2.13571359132667	3.3744572075605	3.35244674466289	2.88992252573145	2.71791535467319
NUP50	3117.87625809057	0.486453650880952	8.64486163641382e-06	0.000645206682407232	9.79982673669047	10.4035416582795	9.2781911469425	10.1033154727194	10.3052622360152	10.3327049792565	13.0871939352679	14.7044119176962	12.083606269701	10.4262468989931
NXN	376.195895672763	0.509935664821303	0.000727885071623167	0.0239864546283884	1.96491120551934	1.9678376235362	2.20258334969324	2.22905311569025	1.10319113047289	1.06927565029758	3.15867385171114	2.79926660049214	2.17514303810291	2.7654789352619
NXPH2	61.7393419656461	0.922048733708759	0.00193155370353199	0.0471916969868915	0.424783975538219	0.313348021584515	0.347789548756215	0.381801624351683	0.672472562149588	0.639183233739884	0.568632787824216	0.833904017065725	1.05756518617138	0.711872597255971
OLFM2	366.750708185574	1.00158659413441	0.00064434521547239	0.0221205442404718	3.0122544749333	2.61078213316743	2.07592981846889	1.68128076451169	1.79179756294572	1.47939966941206	5.34323084369728	4.06234685710163	2.14790003625977	2.83299725634183
OLFML2A	312.538558800918	1.26043525110239	0.00153157495704039	0.041418037137786	0.892406083331011	0.805645979666347	0.395590008063941	0.397377399195136	0.136460622717759	0.140304626014242	1.41365065255477	1.5888314220568	0.430895909482007	0.494824554174767
OSBP2	812.908128826434	0.890327594939102	0.000679021168567603	0.0227430348365522	1.90650330833978	1.9087432575571	3.18090780690234	2.60690173788421	2.56060602727664	2.37670380066521	4.89307348242943	3.98806931309435	2.67869364505612	2.78435809568052
OSTM1	509.075476314576	0.404008682803975	0.000694864027985825	0.0231314715629905	1.94353006926205	1.98657174194615	2.1461154218781	2.0722337335597	1.09645699555361	1.0459129228588	2.62765444415363	2.77103625606435	1.33880729908754	1.26923433005766
P2RX7	38.4840187274491	1.52768875026865	0.00095584513576202	0.02903957015619	0.135950058672446	0.178835771236427	0.0662172040539308	0.0801485984698901	0.0477183724782966	0.10593054174753	0.33997382802326	0.322159824509789	0.203781905859168	0.230383259573888
PABPC4L	331.324257052551	0.597041238080673	0.000673556489136545	0.0226063261086998	1.12883894070855	1.15120373699672	0.955063556253041	1.29885825089948	1.73157090825079	1.37205553756999	1.6253266285218	1.81100231302468	2.70588722225664	2.26329624735056
PADI3	58.8259343083031	1.74768700548082	4.5118588117646e-06	0.00037687292389395	0.257227723632581	0.267348374752158	0.136392038028757	0.156301302167737	0.0684510922646832	0.101303556823332	0.76295757691644	0.607735369606433	0.234490754588458	0.269941930090094
PADI4	9.59004438747711	2.05328390349839	0.00167936830485905	0.0434814046872519	0.0393532000643376	0.0553373989553227	0.0274246494629882	0.0423067202675111	0.0321150967093172	0.00950568768661614	0.195248545471371	0.142565147778168	0.124882660447373	0.100573611974354
PANK3	3489.06342398581	0.676513474118031	1.03840601598196e-09	2.92633557434917e-07	16.1532512140082	16.5416670384739	16.6402926949754	18.7066152328283	25.9363777709718	24.4799242491363	25.6024483140001	28.8715470183442	26.3185900866649	24.6758213156366
PANX2	155.840099473836	1.17915313310001	8.06249683268713e-05	0.00423696043673169	0.792821768875926	0.767465344518953	0.633913304135619	0.59909751700764	0.453213047019336	0.291419938648983	1.97745782547876	1.17939005590254	0.37764916677343	0.72596883194937
PARD6B	687.073318371622	0.492616228355272	0.000980925848366301	0.0295271325811182	2.65377004230175	2.84627282011329	2.36891923335333	2.50826139671381	5.09631442580031	4.73061927773091	3.35791008097981	3.96106116350289	3.23968158452007	3.10423413542799
PCDH7	104.527113966256	1.18748434590245	7.1531227407954e-05	0.0038243269130837	0.120186051031667	0.10341935105627	0.183346116957228	0.177417475736445	1.07107951588042	0.935915203018732	0.352289241395002	0.314093772449486	1.24217999477493	1.20977432059779
PCSK5	664.430277629449	0.451352033637762	0.00090581513948538	0.0280408114675919	0.905168794228587	1.02401650233181	1.00037769608264	0.91650910638417	0.745844209320435	0.731160561120238	1.21372692375729	1.42002847103709	0.97781116800946	0.930140226784932
PDE2A	649.651097183714	0.484928395228513	0.000128307667593451	0.00617789210706039	2.23596737256524	2.46087628535709	2.51324486720548	2.4609159713699	0.722863228742509	0.7014796719247	3.51580430261055	3.25095188363189	0.985257403476295	1.00252358954844
PDGFRA	592.796881995664	0.729304952396686	3.49513357916078e-09	8.28919464206462e-07	1.52399966406745	1.47570044847225	1.44567617099958	1.40807241980699	1.65235934149064	1.54256315932422	2.31523521471538	2.54874417550783	3.22702189587731	2.79522431454733
PDGFRL	102.064671218337	0.717648680480561	0.00144895673755623	0.0401410133480619	0.701850379100194	0.960604958558302	0.913003290783574	0.925551114891755	0.547305309536998	0.553799867663565	1.38320270418744	1.48789120546437	1.03937773301475	1.14264997821431
PDIA4	1942.37371326798	0.560326080476587	6.49813710668522e-07	7.04337999261683e-05	11.8121989412627	11.5573619885237	10.5351716590526	11.056199224544	7.6469722399941	7.00175044233677	16.2293739312459	16.9914281649028	11.5462522772875	11.0435640501739
PDPN	375.898166731008	0.766614576927107	5.06333283823931e-08	8.62893181230764e-06	2.12966841207235	1.9768264448956	1.95244178081217	2.03225583652808	1.07402367048676	1.29326794873262	3.20919321729151	3.69624863285937	1.66786600131044	1.613790227933
PEAR1	428.812427554904	0.558750872132654	0.000205131211057697	0.00903738448716456	1.5313781021337	1.56094452182668	1.51483709055938	1.41787503929834	0.279043626976969	0.261054782984165	2.37053843110703	2.06823472966098	0.411060175054557	0.671007462545702
PHLDB1	3571.68612843197	0.408655059501015	0.00149161140894584	0.0408381716569845	11.2036142911095	10.5991545556104	11.9722682425931	10.0854241286966	8.08229933851148	6.7655272149714	14.9194744205884	14.2286895087688	12.207374464459	13.1760200796149
PIEZO2	810.83924686523	0.827140983688438	6.01632458213677e-07	6.64438008750172e-05	1.42975730578646	1.41688923175043	1.1170328241066	1.28647623507989	0.696477354713694	0.760313109780052	2.18546503280629	2.48599780580336	1.32087782541031	1.28991637101875
PIK3C2G	23.5306426806077	3.53293620515923	2.38881871306737e-12	1.08459005180795e-09	0.0143563516240346	0.0302812664305551	0.016674540241237	0.0231507279418352	0.0292895889054171	0.0433468544598058	0.230007660899811	0.249209159569951	0.170843100008033	0.188545993591273
PITPNM3	571.097750828332	0.535261658286198	0.000221097800937927	0.00953520727263963	1.40850996930036	1.50035467194152	1.33192291406737	1.25693733294289	0.671358664113526	0.62625081567873	2.02792890838531	1.95926565545928	1.03408590890652	1.22113045163939
PKIA	350.673506153837	0.675030267732145	9.73503652495417e-07	9.88317838511652e-05	1.37489832893191	1.42614000778289	1.33075810355395	1.38228472201816	0.288584837128475	0.297253556627175	2.05714513534531	2.35292447438931	0.716598508196715	0.638650017163176
PLCB1	517.048470886772	0.582147182904477	3.2887192373165e-06	0.000281435161957791	1.21946868560683	1.11652243572781	1.24112996653923	1.29503647355847	1.50386615969806	1.46981382603182	1.78461965758911	1.87185579535019	1.75493939841945	1.83677902466367
PLK2	2642.88669592232	0.904118250193839	0.00189347927496399	0.0466148464330623	16.6397892944344	18.9112928601112	10.3746927096401	11.0681267360318	10.9956863093703	11.8804013980094	25.4777680489955	28.0975494370941	20.4747592300073	20.9319863535794
PLXDC2	660.468370793415	0.981011027180958	0.000186376971599439	0.00836904285932097	0.982716443717033	0.964855361251837	0.629796351506109	0.634507655399177	0.310426729873515	0.405571098666955	1.57924954206006	1.60186702270932	1.0462110672927	1.03407191272824
PLXNB3	257.745213495586	1.13369658660399	0.000538511237945954	0.0193449806246739	0.483624107862956	0.412752608014729	0.814976979219628	0.580027324175667	0.38782869650063	0.165436529386717	1.50255956860711	1.00429400204873	0.503759234304248	0.781915016308895
POFUT1	2079.48553455934	0.392108326644468	6.69781425463214e-05	0.00363706890338745	5.91618113201941	6.26389590336184	6.15599564278244	5.97284001069617	4.26445036002635	4.50260487186114	7.57487179945992	8.40683167334927	4.76865943791428	5.14884434374979
POLA2	982.575873174273	0.424083675410128	0.00114567498209594	0.0335592429791365	4.76167258840872	5.27563499941963	4.44258306243348	4.63126595519545	4.81089246339969	4.76685263591683	6.30356509265896	6.53459358821475	5.12570377710588	5.2991063616208
PON2	1222.33290956913	0.42153042288607	0.00190873071353708	0.0468441494185639	11.8667028970306	12.776415100157	13.1319136949452	14.8429828441323	10.8334084845707	12.5225079026593	16.4101296967121	18.8830583759323	14.2186966213111	13.9868666697183
POU3F3	452.445335054976	1.05588352329174	8.43475390787067e-07	8.78127723720676e-05	1.68537546427336	1.64114809351854	1.23608725758668	1.27596166985237	2.42684221149712	2.31262875795158	3.24284933704761	2.83463977066253	2.69031030923815	2.89284914010416
PPP2CB	1576.74419443312	0.457620654982758	0.000153793109079468	0.00706109092107838	14.3339936104394	15.0152554505473	12.8332742287832	14.164547651473	11.5080455048349	9.81435714921149	18.8287860492114	19.9337315488359	12.3276573440096	11.5377162745333
PRKACB	2208.53975984563	1.47565247269443	1.64704858300927e-07	2.22487678423855e-05	5.0154403844253	5.18071250047712	2.97043829200073	3.34497518982172	5.02568077739393	4.09561207896274	10.6601206775427	12.4160787950598	7.97623638789631	7.62881721361656
PRNP	3392.70253644279	0.401267778153029	0.000867141632066354	0.0271521647052195	19.3306264534655	20.0441244576329	19.4761274091168	23.0832830917077	37.9737181471359	38.6224845945872	25.7872671978118	28.3980731780393	35.4187521169632	30.4005571597692
PRTFDC1	96.9711987381738	0.739104290242464	0.00168207473639553	0.0434814046872519	0.781728310350609	0.960260066146093	0.730540687559942	0.695502010204205	0.354415343977066	0.282152191464125	1.29097521449679	1.34726699422925	0.529546361876857	0.586848377666213
PTCHD4	132.481921715582	1.12023095237532	0.000855154413527314	0.0270356376424103	0.409776502968562	0.508426382327588	0.251970919781153	0.285049393403719	0.983551976678044	1.11873148969286	0.715422614883329	0.869770405308795	1.03031037888892	1.01204989681359
PTPN3	1058.02642654651	0.430178521787408	3.75140710928002e-05	0.00222162134786891	1.79379749304387	1.97237534149738	1.93976429189738	1.95971774362128	2.37792315470238	2.76188294121882	2.49348372700982	2.67654583408205	2.7814579895692	2.58560431736836
PTPRN	4932.16442112042	0.528812934991091	0.000142921052531088	0.00667441315320181	20.9729407401705	21.592964433691	23.8299863300517	20.6354003641377	7.49731450147856	6.73443936886367	33.7852078317013	28.9921663449163	9.17199718662964	11.9693315812564
PTPRU	840.516858615946	0.535296275026672	0.0004091639049164	0.0156990235348793	2.47491856553555	2.61790049238694	2.71302234833811	2.45678275093883	1.23384037774085	1.11851101148659	4.07410409647859	3.3588753256672	2.15655083586381	2.49520040393582
PURB	6232.42277895248	0.72234161709776	3.89227075983542e-09	8.96044585486055e-07	10.5064215344317	10.6716831985365	10.8753981090509	12.5869402009482	14.2900172072197	14.192578177219	17.2431300784808	19.6459937110804	13.2672891072278	12.4119502373327
RAB11FIP1	1927.77314213853	0.73337185108192	4.32222949400081e-07	4.97512965348192e-05	3.49460023280081	3.71103614157628	4.33299686945649	4.39359275081591	4.15123190311785	4.40967230394457	6.20161423499333	7.06068896135062	5.84575047735061	5.39985731161352
RAB15	2633.80944358684	0.534637238776445	8.58844585140562e-09	1.77693857520538e-06	12.3721424825731	12.7155718903861	12.0655334001228	12.4517111326469	6.37168963438026	6.56450003017689	17.2273672617513	18.7733843548001	8.96676674200721	9.39214160460708
RAPGEF5	107.193375367524	0.917663507028823	0.00021137157966304	0.00924553830985853	0.215366954142494	0.264987756096841	0.20324141836245	0.306778026850702	1.25225598328493	1.30703923426376	0.442438304913749	0.493050361325836	0.75666704088642	0.775919391888115
RCN1	4649.81008006118	0.484666035775378	5.95463139419816e-05	0.00329787501812853	29.8580987429319	31.3248387873359	32.7619375125905	35.2906148071219	13.1738909329235	14.855621705597	41.5476934537268	49.0554056451323	22.0752899169788	21.0153945333718
RDX	2862.06525402383	0.693605334796711	7.9972262476425e-08	1.25687175978574e-05	8.42508886582877	9.18581871494331	7.53881270656151	8.72232954397727	11.4023354222295	11.5917903490671	13.1855674965892	14.2597268620764	13.5690271365866	11.9711844601437
REEP1	61.9563985791479	1.34761411678352	2.32520242453869e-05	0.00147881064704611	0.218680291898532	0.160157435003585	0.216951194512343	0.230194832919903	0.204484445313733	0.159565830742495	0.409688880312006	0.651009860009261	0.320128363451947	0.36223292565599
RGAG1	15.5356618440594	1.81837799800608	0.000923843381525713	0.0283838723139808	0.0229983408411379	0.018479794859389	0.0496079864502817	0.0317885179746854	0.00893730114837245	0.0119040080778763	0.108671324608098	0.109104639909481	0.0111707871852443	0.013994300965838
RHNO1	2149.67673735808	0.472611185529807	1.7116383031894e-06	0.000163606596875034	14.6942517235363	15.6674010792257	14.6300599066039	16.2015336597822	14.0226581461593	15.0904913830318	20.842078969799	21.6671252191431	18.1870872876768	16.3946416337739
RIMKLA	40.8838279365388	1.47961588842246	0.000230671523599902	0.00982617510295327	0.0269876046992449	0.04980837129927	0.0489772219333808	0.0670927181761523	0.0435888979369055	0.0387053902539053	0.122041886982709	0.145973366216237	0.061172804760726	0.0718450913432084
RIMS2	238.000750207857	0.830083030298782	4.00813570154933e-08	7.27921978242486e-06	0.480723055345059	0.481046003285396	0.438887263041512	0.4759386639501	0.44096327759344	0.448268344825135	0.820448567038196	0.850509375902242	0.620849925182835	0.517458570911151
RIMS4	473.263657559782	0.945310406522806	1.95452645407431e-12	9.12763854052703e-10	1.28313337061984	1.35202754802685	1.51417227279767	1.3500066317071	0.716702935583936	0.669466791333985	2.55001252327419	2.75117442646965	1.36116792288961	1.17081711879677
RNF157	109.322165972818	1.23172555948156	9.33582168850884e-09	1.88387661109478e-06	0.29511280808517	0.348377935299358	0.3089126415599	0.270259790599141	0.0991085142674615	0.0616033837201303	0.68162911254318	0.751601633195926	0.210589771416576	0.186224591148098
RNF24	1428.98571352005	0.336505407233784	0.00092809981214383	0.0284292762066547	3.22427737984405	3.35579341603716	3.32136861948536	3.57295698665236	4.24414890173519	3.93868858469604	4.05079432303281	4.47092658493215	5.92472577766538	5.19721474997627
RPA1	2323.72822932457	0.39783949764203	0.000325604486070031	0.0130381715190604	9.57611441528752	9.61174322595722	9.3782833505377	9.72582327733199	12.4833856986768	12.1650378154213	11.5394081021818	13.7570172481637	13.2803871314875	10.951606048055
S1PR3	595.778247481431	0.800588455142032	5.99839144279325e-07	6.64438008750172e-05	2.31572237662092	2.34796785544641	1.90163194367732	2.04839536642539	2.13845704922786	2.20308609662108	3.53582078514145	3.98608969189472	3.22309965717069	3.18983527829476
SCARA3	2016.44243878686	0.397527064416372	0.00010627889594721	0.00531231973778945	9.07167256702312	9.47239948338992	9.93674776190986	9.20237408073483	2.52466396351729	2.13505881833782	12.5985499672795	12.2420813929685	4.14945964050415	4.43207156352361
SCARB2	3256.07911449634	0.48833414299942	5.84456899947023e-05	0.00325236520494595	11.1965674196895	11.7898261278369	11.8795561762871	12.8409549054116	6.73948812053349	7.41617122842976	15.1564140924298	18.387275386103	10.9095215244813	10.3219286600236
SCN4B	61.7932708747784	1.60900040390466	1.7464934098455e-05	0.00116042417820832	0.188665071817056	0.114441277856141	0.0945265464993221	0.202824685275018	0.080504330410573	0.0893562258152544	0.455024527077074	0.469053832335103	0.301868559952532	0.414934847216595
SDC2	458.894165929166	0.985462064272417	8.25710788484861e-06	0.000619093708155278	2.19960110201788	2.35213321223842	1.66357844949087	1.63328219555559	2.12899592331522	1.79162437789205	3.77520205908365	4.01514182336506	6.27287727891351	5.72312431449277
SEC16B	31.1430520552504	2.12032083565481	3.226356064311e-08	5.99258975808674e-06	0.0620223645149177	0.0809845781431151	0.0668918823258521	0.0809652218638428	0.0120511421548382	0.00535049269636818	0.265591880162505	0.365565287398376	0.0251046600675678	0.0251600652884814
SEC23A	3622.9871553906	0.467707108013333	0.000928827733175496	0.0284292762066547	16.5597999456419	16.1886376335056	13.7019476578941	15.0131575123384	12.768313316691	13.0088070945004	19.9012426175219	22.732264439336	19.2467765629041	17.0861662715553
SEC24A	1266.49523224253	0.423207192012459	1.50734873929356e-05	0.00103519391360308	3.05829388736287	3.18896754081761	3.14148019252295	3.3719876465829	3.72685711104333	3.92847893496515	4.20269105836035	4.36351208492732	4.36770868742735	4.09838537363404
SEL1L	7361.01128940434	0.495937049872179	2.45238857407864e-05	0.00154170350935828	15.1517024599857	15.705400372888	13.6001286230042	15.3167593403947	10.2093690221659	10.5417533325757	19.9220223264921	22.3301778055352	13.3626859789798	12.4784301044703
SEMA3G	24.1480127348714	2.50349494454494	0.00159962411386579	0.0421028279245352	0.0465831146088209	0.0755814323419935	0.0249715903652937	0.00385225010677036	0.0292424900689863	0.0302940056826731	0.229637799334545	0.194719634000533	0.121834555310825	0.147541657231388
SFTA1P	533.438061445268	0.696058860988678	0.00180781263431337	0.0453671382636895	9.80099113810132	10.9603983307484	14.3116700649962	15.5421337460672	21.8327047066284	24.0469208373501	19.6231127437218	21.3823720800623	29.2421978551886	25.5666926062751
SFXN2	794.141195302609	0.388807955188603	0.00185513446978009	0.0458751523413474	5.3926325966383	5.53801655634146	5.71384329180372	5.61034668652885	3.08528054374092	3.01694276231718	6.60969101447032	7.99642831549665	3.95094435660095	4.01103685642709
SGCD	15.722244124112	1.86702254683206	0.00130623895117514	0.0371312620121004	0.0175739349656397	0.00741359672518568	0.026535186758599	0.0132250206987656	0.0549762080399539	0.0785315611767415	0.0508620151230381	0.0689706686436673	0.147388904895111	0.137234464945946
SH3RF3	704.353953559376	0.58268492100816	3.15763747564356e-05	0.00189748472571301	1.99736066382831	2.05400911904349	2.29406655402812	2.17798974909057	2.94556188931145	2.78429956804323	3.4036987875986	2.97819118529824	2.43285710109154	2.70513277665254
SLC16A12	139.661028526128	0.84604843412217	0.000224214100345468	0.00961765275327807	0.466695576617598	0.564053556811589	0.367343151937169	0.493428898628456	0.361972298371241	0.358684435522347	0.841196168766682	0.857771085119223	0.743124009477358	0.618811315851145
SLC47A1	11.0628866420586	2.53123519384499	0.00029181543309811	0.0118945717057072	0.048930465587772	0.0152899309098879	0.0189438338010577	0.0175342582627471	0.118313622521669	0.0590952862127691	0.157348057763983	0.142246307354145	0.172527737672034	0.200697367394181
SLC7A5	4711.04948583739	0.521662903216319	0.00175169657861222	0.0445279635729653	18.9776336337484	19.0911839627079	17.6872732932311	15.6811739486207	13.0097516465348	11.7601738604043	27.9938405782033	23.3153744789353	8.4942044476081	10.1688643237735
SLCO2A1	102.273841174625	1.21237409908935	0.000549414198543135	0.0195646515799293	0.227955950739717	0.237441077212988	0.41185680060211	0.458361205872469	0.166507232405991	0.137655773259534	0.807226515176231	0.739157923420079	0.631531711047588	0.503463451844147
SLITRK4	367.017950267906	0.431325101307667	0.000900860514851367	0.027986481445801	0.655688000206542	0.715914129799324	0.719007022998972	0.727703963943647	0.991489339016878	1.01782531378744	0.93289053787395	0.968388623245457	1.27423911036853	1.21845590952991
SMC1A	5049.10266803639	0.398777825319701	0.000633082232856042	0.0218306521013333	9.33897805345538	9.66109066347583	8.39067230881103	8.99189077603519	10.1602560566605	10.7977145416641	11.4734696156894	12.5684529789359	13.4043776457835	11.9443571336833
SNAP25	249.45228822259	1.35689126156548	2.07134259708411e-10	7.05335307277913e-08	1.21165623495652	1.09238724923122	0.868625604698449	1.04706037048412	0.764861498376209	0.833208302638075	2.37298415142401	3.05699857799452	1.83316432124995	1.9672634593726
SNAPC1	983.105829908565	0.49831139824596	0.000664170749342629	0.0224759231842759	6.51061356937898	7.28628532118209	5.92479814076152	6.03233938970957	9.75901128712588	9.99509102347846	8.97740829580034	9.23989628709861	12.2472932906737	13.579898943638
SNN	594.329121851894	0.683733264960422	4.18507149379213e-05	0.00243434140804386	2.87287915116114	2.49537240861234	3.44988773267414	3.06522781067775	1.8617496807072	1.85572948749399	4.65278172698394	4.91088979708702	2.28102388987096	2.36594716525201
SORT1	3806.68897464036	0.373210198072713	0.00160331908607711	0.0421322354693415	9.2951434793258	9.83359945948522	8.66556670529946	9.50041481493445	7.51433022637197	8.3493518535897	11.195707382154	13.0211568641485	13.3989996235945	11.6423149248115
SOX2	59.5961837192236	1.53603813879444	2.62366249467772e-08	4.986484125059e-06	0.319353098452039	0.279418617973453	0.313221812537074	0.236510060794848	1.01350489316525	0.865672230743926	0.806896481956479	0.864121488539979	1.8981681447776	2.0454371867369
SPOCK1	2787.69249569211	0.635368323545238	6.50688515683782e-07	7.04337999261683e-05	10.0528471080448	9.62310145425491	8.72492468216843	10.1998636541036	1.77318313641675	2.274807360927	13.9411385044125	16.122089163441	3.70850386455922	3.74919895615326
SPP1	137.53809221563	1.32798220163723	0.00157102718521299	0.0416316061442941	1.42498067597906	1.31281420288992	0.616374288095936	0.623336114988848	0.360896497474879	0.49849838457982	2.42775797874735	2.59103380025721	0.38982804012307	0.29301628405979
SPRED1	2296.89001743522	0.405860134771344	0.0014280459117719	0.0396962762379452	5.50904661179089	5.30726463022814	5.38260249618645	6.43234174013501	7.98426455673492	6.75439708074188	7.14204646706495	7.87555356612605	8.35460940966721	7.77995689412452
SRGAP3	77.4528214707364	0.824594176473274	0.000282956325589934	0.0115623028544187	0.140744687386777	0.131011738147201	0.138144848290155	0.132127937888727	0.256138698040228	0.318418868804034	0.243830000665453	0.237383996851802	0.366205888896664	0.337743031427274
ST3GAL5	147.079041658766	0.811503780007629	6.21591083569515e-05	0.00338663542031457	0.815614362117742	0.870411171068096	1.00652272508259	1.11169202938232	0.554667601662553	0.492525092389866	1.6635108279527	1.678159124803	0.850096296366417	0.868515587066108
STT3A	3330.30507356635	0.357119506521833	0.000453972325104812	0.0168257996685672	12.98800645211	13.8355426869305	14.2789037494331	14.8201794441412	17.38987076033	21.3207683149543	16.9657815563363	18.9083609119624	18.6118710474113	17.2025793450122
STX6	1430.75332931926	0.390158563422423	0.00153506649465075	0.041418037137786	4.64211837376315	4.75364946602489	5.49374167628079	5.36074431992865	6.65797928950118	6.79057996773051	6.37102777723667	6.91692486154949	7.76227973451917	6.90527489481842
STYX	1653.32783525612	0.642994912683172	4.81473305990582e-07	5.4650563794556e-05	5.73338009870094	5.48471799244785	5.14340474937769	6.31737727385063	10.7697511234946	9.43033414758282	8.60892311741136	9.13019395664473	11.1345542940519	10.7011040095654
SULF2	11.2320834745837	2.40968406440659	0.000247315869634142	0.010338562376394	0.0240310037687867	0.0168958717547256	0.0232595038694182	0.0172230458604202	0	0.00483720121549889	0.140755733606215	0.0765781863580403	0.0907851288356708	0.034119558319765
SYNJ2BP	1482.10384327909	0.476155132384525	0.000120795399999709	0.00589373377013507	3.87345855964707	3.79568311698409	3.40792056945809	3.6212515114869	4.04572887567983	4.48600464866614	4.82588514935034	5.42503129915779	4.34419571971255	3.78231332756714
SYT17	193.580290644114	1.0730332277017	2.97373436708327e-08	5.5868607160892e-06	0.643242254659869	0.836501500920137	0.853839601837363	0.71231616020673	0.38810824278799	0.268691698336553	1.52971620524454	1.66935175865316	0.78383205382532	0.782815227223061
SYT2	168.118548902684	1.22014279642465	6.78969366812566e-05	0.00367475307965278	0.401044470381844	0.328695186544497	0.218261993605039	0.234049325968935	0.15584842534731	0.141155612947611	0.68220278517957	0.701065962164057	0.176614946486919	0.247286020272032
TCF4	1435.91421399082	0.693426459826066	0.00180288775674002	0.0453671382636895	2.33876431562297	2.45053868529975	1.66701570305929	1.82796300930945	1.02833302626376	1.01352878983276	3.02380769538717	3.70469721932391	2.76085964328674	2.30282450975271
TEAD1	7595.34867192764	0.54270888460528	0.00136994434347621	0.0383694477489719	14.5838337025598	15.8617460713725	11.7139747563137	13.2216947802211	17.0006394114867	16.8154666222711	19.144779801157	21.3173832848324	21.2728059056352	20.5235430191611
TENM2	13269.103753972	0.827788071868253	0.0001922285731403	0.00853797833689729	24.491701273156	24.6487399313495	17.4420107686441	17.3389761786547	14.1222490909292	14.3875605417042	35.9382365130564	38.8383894746505	22.6297962057883	21.4489847994064
TENM3	6819.56296618196	0.715588052332753	6.18985510387253e-05	0.0033837184505952	11.3910174792067	11.4248057805553	8.77907235005548	9.17609228663926	3.27402120257492	3.66415727549881	15.9875204826685	17.6051621098277	9.26011772525574	8.87303167548474
TFEC	136.435245356861	1.25614122988481	4.10231593231699e-10	1.28946834449464e-07	0.302816218623636	0.256955472378574	0.272881085226248	0.246963698454249	0.355057812498674	0.457154118974507	0.607113901412162	0.688261138331612	0.952666890614422	1.00072879391673
TGFBR1	2239.49445116627	0.528953698794508	5.09608751589522e-06	0.000410322908607426	5.75205472942841	5.74175323755293	5.68793616482136	6.50087124843544	3.54026257220842	3.04466725129482	7.97534743033268	9.14700201504869	4.46059384688945	4.09505793140864
THBS1	16406.5661756458	0.663490696322321	3.36853239107563e-11	1.28043399842165e-08	38.9959464554708	38.2523360640003	35.4116243178776	37.3959811450187	41.2706036073357	41.1169675634052	59.3089693209712	59.7321203784537	53.467020595941	50.8177191459149
TLK1	2434.42098305505	0.385945572164341	0.000428859628300181	0.0160405277450033	6.99248692350081	7.48045674870194	6.75884396028363	7.76828394686527	9.14886271275803	10.0084868764855	9.12470140539735	9.85301565580098	10.2695905959901	10.1881913712791
TM7SF3	4901.04588165442	0.746510282662516	2.14207383357454e-14	1.59146349135345e-11	17.6998104488219	19.0215590732179	17.5032696882749	18.6356477762937	27.0092028527472	30.5389523651493	29.0838885574284	32.1588857580873	36.9070142376107	34.9461088735543
TMCC1	2182.56764716686	0.539181886861488	0.000825469854622498	0.0263007890327577	4.82792479545998	5.01804208272168	6.02938504679369	6.48427249251789	3.07593753825861	3.24044425959366	7.84856177207867	8.40678166245294	3.78904440253113	3.54595273509221
TMED5	2038.9478287385	1.24171690723197	2.34316428464631e-13	1.27663400775146e-10	4.81919860629431	5.05815141067065	3.79295982544576	4.25440072725362	6.64486534136312	6.13015420800918	10.1711154678788	11.0827210830932	8.29075777073512	8.08234045568622
TMEM254	401.391534351037	0.497438255812427	0.000811506395641475	0.0260590806223181	2.4453790067204	2.70365203964021	2.29821434190884	2.30782051553507	3.29216172008478	3.46440013378553	3.29298768487842	3.60041272712026	3.33563734372951	2.76521851235827
TMEM45A	702.683939859626	1.22509382566217	0.0010775543416711	0.0319648379575575	8.18344173452177	8.19678634240127	3.93077936064905	4.02768035369614	12.469833265132	10.6626656736157	13.5245258346431	15.0919163712789	19.5499981991777	17.2757794325259
TMEM63B	1950.32047577104	0.532379159074755	6.78684129322067e-06	0.000530769956639674	9.24228705722443	10.0839270379216	10.5181854465956	9.20117714109635	8.95790132900373	8.5296084462077	14.2253423092686	14.0368493380947	12.4405949739885	12.8870833625943
TMEM63C	486.978887500137	0.502002297763182	9.06892691877325e-05	0.00458921394697674	1.54773469568104	1.48495174982665	1.65583555513666	1.5787486495976	1.05928691811665	0.952565983679072	2.28200351894813	2.16189938784119	1.29782820373294	1.26508273484956
TMEM64	1014.07505077179	1.22391628022404	6.98977101260968e-05	0.00375815155266793	3.65492335206374	3.62050588126702	1.98505747648576	2.23504849263843	5.81140635151324	4.94586709887433	6.86742899689433	6.60770279678418	6.38535856677371	6.15048995051434
TMTC3	1661.26324794198	0.744303491615736	4.51740225236302e-08	7.93945589407242e-06	3.43026815021448	3.58460044128336	3.61334891060766	4.29169167368422	2.41358126851842	2.28963946680579	5.87870112986559	6.63732171122583	4.47112915358481	3.92157499085338
TMX1	2391.63381519687	0.326343697743502	0.00159476762303307	0.042094437930007	10.8230699673897	10.8812639813214	9.92637961192829	10.9160309005907	5.7972719847037	5.36291762798188	12.9610319639269	13.763924337082	9.14434703737678	8.65497660963633
TMX3	874.830024243376	0.876129806932112	0.000192189531541886	0.00853797833689729	3.22726926900643	3.4603659285624	2.16874359141082	2.54455529971444	3.24484304317479	2.85861771220588	4.9978947024855	5.50092655296847	4.13452217916323	3.5952858395075
TNFAIP6	144.697948543016	3.16216188547265	1.60460702518995e-26	3.27841272834122e-23	0.563353218617642	0.316868785871981	0.581618268105507	0.726760527516754	0.119191212155015	0.151196507094	5.1889460484713	4.69902669610825	0.553346198365704	0.675434674050609
TNNC1	56.2770765857979	2.75499541102394	6.35777952614443e-06	0.000499605319013609	0.742791651214372	0.972459377331253	0.178496640901345	0.302894234329034	1.9160623431816	1.2373783109302	3.07109691314345	4.35598659740311	4.58659253841352	3.27297745864814
TNNT2	71.5458115833883	0.963763487480323	0.000149848589207168	0.00693845663056988	0.759446172542048	0.693206385568134	0.943977751134469	0.816443814669211	0.235582716144954	0.4022866705939	1.65260820438212	1.48825015066634	1.1929254135784	1.15394063265542
TNRC6A	2942.32185498531	0.708892951296264	0.000108299759240847	0.00536411989330801	6.01782948772964	6.73575466963436	4.8211472198616	5.23383660018046	6.80018678611878	8.59732566113204	9.02950626493208	9.66412663222335	8.56676642582685	7.90406050094495
TOMM20	2584.96673728398	0.334510986546092	0.00121957378883736	0.0351568493448794	13.324168112773	14.0113313285176	13.2307932570974	15.0828394579233	11.9837696838963	10.4121820776584	17.1745537860577	17.9553468295267	11.8778193620482	11.0964732967312
TPM4	3525.91050737029	0.458760943737594	0.00036235935346899	0.0142032701018001	20.6408517184605	22.238005447916	18.7819122805763	20.9774132042115	17.1415799157441	17.6444460884671	26.3543681157864	30.5860714425179	25.1022256762885	22.9847376057073
TPST1	535.350135055894	0.484126019477081	0.000816743041398844	0.026175813748361	4.13732414601316	4.19223291676211	4.8255883689409	5.10193055949569	3.45202058534181	3.91556933866368	6.2080779141359	6.57750595664983	5.08307308529855	5.30655340930828
TRHDE	248.974721442898	0.6269138889334	5.27946533813481e-05	0.00298591214366136	0.719244941809882	0.763052098671225	0.8130084753446	0.711091232334943	0.28823762050167	0.263700651565673	1.17489370380344	1.14706483349074	0.323879053961039	0.483243645911834
TRIL	38.0132154319576	1.15031464192489	0.00164273153460783	0.0427554887470781	0.0987254726297583	0.14378311117011	0.106476635474378	0.0758106973148044	0.0431610130814498	0.0596173569111151	0.244181360578257	0.223533466972197	0.135867055846691	0.100122728165397
TSPAN1	60.3565349351173	1.12574045498869	5.8500787412304e-05	0.00325236520494595	0.634724357575449	0.523208482940381	0.470293175413489	0.470594089163476	0.327459641707648	0.370074102569181	1.18771703823227	1.11226778635402	0.458905172270108	0.621510759489559
TSPAN11	79.7544183829923	1.49518484895698	3.72267527356578e-09	8.6924467637761e-07	0.16346224039669	0.144223469121963	0.215916109310365	0.182621727238884	0.139500312207318	0.11225837750726	0.477063598158205	0.522508187245229	0.352357128905199	0.432317051352062
TUB	1015.52057192149	0.436296341160421	0.000173171835181754	0.00788438341516929	2.74344617134372	2.88572549414397	2.6783688631098	2.58648369502176	2.10076123369974	2.33501271567599	3.68419987156863	3.695493631693	2.62269395213244	2.54950501020012
UNC80	112.016537142108	0.958629114806542	8.08768220410086e-05	0.00423696043673169	0.128819198028034	0.092419413533259	0.132826139210764	0.142726690193145	0.418358216755277	0.450864817968788	0.221466802909179	0.264554604956292	0.844698322481096	0.627083367390601
VLDLR	938.40979193365	0.849160013822515	6.08860400854396e-15	4.97591162598255e-12	2.6573149456681	2.75731996994528	2.78797332536218	2.92217242595691	6.81929636962594	6.89641878031546	4.73157430729705	5.30732761404408	6.37584665709044	5.63533930373018
VSTM4	82.7303771111031	0.763137661330658	0.000615637929553733	0.0212739999123801	0.169382893810977	0.157756654499608	0.153299188138372	0.175000725173681	0.104718833976272	0.0611054787801416	0.266030359455417	0.292202258711177	0.119669676736694	0.149917230090102
WDR62	1800.99885165083	0.483340509807515	0.000572068867887511	0.0201953901633291	6.56349174965568	6.59318576923034	7.18259949992398	6.18771225263892	6.67364569194689	5.6763980285231	9.93753888396301	8.60866650248056	6.86390293801353	7.66532010589359
WWTR1	854.46082051262	0.771388180580834	0.00013964238317936	0.00657767940365027	2.16900144546891	2.10650207169169	2.93589891414331	3.00668587381325	3.65487991327881	3.46203096564005	4.1131068775247	4.61605689574083	4.09204368718566	3.92846737313524
XKR5	38.3830601213403	1.04775030322256	0.00116911127560831	0.0340019996438041	0.117002980859543	0.119655569101485	0.098833462265184	0.110537665901809	0.221829218121437	0.23551532290378	0.201563639884116	0.260457376020742	0.365669245910192	0.246666718045028
XPC	1858.82571464216	0.325998615357501	0.001669559149502	0.0433846491233866	9.31604496748864	9.1645872979557	9.20620416932681	8.783932795542	9.51625567276352	9.59028064114986	10.8677203668334	12.0464356208848	12.1442632323759	12.3017028037161
ZBTB10	1955.74417826865	0.452256235200259	6.0483429591551e-05	0.00331745522373792	3.47916277525322	3.46364323114571	3.11841252545312	3.44188286444269	2.1108002679015	1.85744879353442	4.41718286919809	4.84147258444081	2.73425836699247	2.60496357127919
ZBTB20	19063.7568059334	1.1598155972896	4.57113365492045e-10	1.4097203696165e-07	7.87266799813503	8.27330860041171	10.2869848511771	11.410154733103	11.4708587178606	11.8899241350046	20.0432679861187	22.2494266995583	16.3249496730125	16.3012589097553
ZCCHC2	469.932664305985	0.674285724225987	1.2842017205456e-05	0.0009126207444486	0.977631659295028	1.09977522688507	0.860863279215059	1.02167411166105	0.810188404549168	0.878679050536842	1.56276963186358	1.59924422722845	1.04873380715573	0.981322765818714
ZFP36L2	907.515153055775	1.02461326851221	2.09132597260621e-05	0.00134577649693892	2.89634437516571	2.87129624977524	4.53022831259174	4.19833195869934	3.65705989565467	3.17154837258081	7.68397927902666	7.04364994720416	5.76091379224603	6.03133024602947
ZHX1	3007.89652877364	0.53248180365214	0.00108863410326726	0.0321186361333995	8.41363114090682	8.97765569892335	9.38133150536243	11.6522009927234	8.93944490966956	9.10946782285474	13.2120260316688	14.5992507514146	9.25886998441777	9.10690985051503
ZHX2	674.311015367999	0.621558707128792	4.74464207994309e-08	8.25012497836912e-06	2.54379301888693	2.68563479843943	2.59829521873644	2.55884321441804	1.4128726992305	1.53612043857942	3.80452473754866	4.19780608335121	2.31289538443838	2.01489468020961
ZNF117	140.426808971766	0.692693137041857	0.000930539172258198	0.0284292762066547	0.398073227196709	0.367953954140467	0.32008985385869	0.353132952089247	0.461917794799376	0.628697930684681	0.517923901654422	0.649898794628981	0.697241555800383	0.58890425146028
ZNF365	1856.05797005711	0.847100051769325	3.02490392409032e-06	0.000261598172694478	4.40105534582852	4.14575845627372	3.2398967529304	3.62304583459739	0.973486200570514	0.907355927602874	6.45493780866763	7.45767789843705	2.45233480133363	2.34199333600475
ZNF532	2736.4298815656	0.827567769768035	4.65146532988779e-21	5.84832313977045e-18	6.0472581285773	6.2723583304256	6.04879659075102	6.35530021382884	6.49855851205898	7.55386952329795	10.5808679178069	11.3956440349169	8.13273932017649	7.53953176664377
ZNF770	1973.44495665086	0.452215056320012	0.000335925872067408	0.0133919716559556	6.4135314377981	6.38199274504731	6.01633281487376	6.73657641308087	10.4945274450496	9.78510046674366	7.89082499819786	9.63817246689175	10.2504575784608	9.30115150730268
