# Supplementary material for: Integrated analysis of H2A.Z isoforms function reveals a complex interplay in gene regulation
Source: eLife. 2020 Feb 28;9:e53375. doi: 10.7554/eLife.53375 (PMC7048395; doi:10.7554/eLife.53375)
Supplement: Supplementary file 9. [file elife-53375-supp9.xlsx]

## Sheet: 201901_ListC3_4_DnZ2_withRPKM (
Table S9- Genes down-regulated upon H2A.Z.2 depletion in U2OS cells
Gene name	baseMean	Log2 Fold Change	pvalue	padj	si.Ctrl.n1 (RPKM)	si.Ctrl.n2 (RPKM)	si.Ctrl2.n1 (RPKM)	si.Ctrl2.n2 (RPKM)	si.Z1.n1 (RPKM)	si.Z1.n2 (RPKM)	si.Z2.n1 (RPKM)	si.Z2.n2 (RPKM)	si.Z1_2.n1 (RPKM)	si.Z1_2.n2 (RPKM)
ABCG1	62.2893695048602	-1.61966316233054	1.19533991081838e-06	0.000118411096014099	0.469782237106454	0.528475997568336	0.419281430000719	0.345553780381932	0.174873605659888	0.197088107111269	0.127784892363805	0.159240590398546	0.134508052742603	0.280843558171565
ACOX1	2555.72626418915	-0.529543816270443	1.68487815749144e-05	0.00113330590469949	6.40474822451847	6.789471028572	7.4389534891255	7.87321864608459	5.08461984661283	5.29012053774771	4.83942179062043	5.04235362185975	4.47678374947599	4.15668688533047
ACP6	404.180597053672	-1.0630055164209	3.07733106107262e-05	0.00186292504419378	2.55707726114897	2.62664058784985	3.9459318459276	4.03575123723783	1.29086571327193	1.43097829487839	1.54960739462782	1.59988971225116	0.945467547741009	0.95270391675265
ACTR1B	2174.21985796104	-0.346115521493081	0.00140142410094188	0.0390892097779779	20.0139256243943	20.3384792043518	21.9618851971708	19.7590745290491	13.9489462011423	12.2336053537945	16.4190796879839	15.8976239911136	16.6608844315628	17.1729368211184
ADAMTS14	179.145437620771	-0.830797260374788	0.00041220673883729	0.0157606037963489	0.672837872415607	0.689320593852347	0.814976395660995	0.809446783982368	0.492433406857547	0.402437058134309	0.496762620745705	0.34176518022666	0.2396619712216	0.341180252698764
ADAMTS16	747.44053167833	-0.5093369294543	0.00151432721354421	0.041316612659788	2.92281127132454	2.98174850356492	3.49877803893342	3.81219506497302	1.05717839448884	1.22857718732021	2.3472880565798	2.29604746322059	1.0027014093485	1.09340376155227
ADAMTSL1	2408.35009221456	-0.855322878668998	0.00154319843251639	0.041418037137786	5.10330191984902	5.621140597309	9.23673237856822	8.13479500879609	4.47275820071452	4.48325250699837	4.0328311140578	3.71756690117269	2.93865932731694	2.83308754174462
ADM5	255.696843123929	-0.694857140443588	0.0006030048493237	0.0209553926813914	2.70106054987044	2.46880259430224	3.25485920189044	2.55895562845335	2.7553293199471	2.45682869746909	1.84091320645815	1.55441237711258	1.77934983833447	2.19314285013203
AFMID	599.839731760587	-0.451446373374918	0.000218688726617598	0.00945626253059426	5.71124247378162	5.79113565817307	6.41298764838333	6.2463522101632	6.12907699837121	5.51217665899658	4.2398199050897	4.60944143886937	4.70496662150759	4.59348243826075
ANGEL1	1258.86255124171	-0.606945386345046	0.00106981974455439	0.0318510086060865	5.46388215342316	6.43312406269352	7.87226197240115	7.65478922639303	6.69429074376833	7.604503904157	4.30297207971449	4.70414125213547	5.77474355297854	4.91936500084885
ARPC1A	2933.65533840463	-0.597256001818037	3.32260080186533e-09	8.22847122825589e-07	39.4146419927517	38.2647266681675	43.1893004822352	42.1461811385807	8.44944797056583	8.17270279540335	26.143500791414	27.8189818438822	8.70026599395516	8.2217519633297
ASAP3	662.244643872182	-0.460254263453274	0.000833686440294133	0.0264081489662938	3.04845128533066	3.48969472978515	3.67035867379414	3.69728332592178	1.23220026042336	1.40009713505542	2.5651647627123	2.48870951612756	2.02431595754082	2.15802097562504
ATP5I	589.142896193005	-0.510301421161144	1.70174814832814e-05	0.00113996202805014	35.4586348787924	33.3780029567286	36.873004723182	36.1771139992733	36.1378425217829	32.6789916877885	24.8380221578067	25.0660776949697	24.5218467866128	21.358344957549
ATP6V1A	3446.09716106537	-0.539589550670569	0.00058963391325106	0.0206371869637871	14.9703325864603	14.970844732529	16.92333142466	19.5237914852282	14.0899130858832	13.3832445791595	10.5392182767183	12.3306850827141	14.2129040920324	13.0274906832183
ATP8A1	600.198183492626	-0.451319807048298	0.000247976303654828	0.0103397262327504	1.45103485353505	1.65275868493391	1.5388969567999	1.61737242555173	0.444710548594674	0.415534835799553	1.1353707600257	1.15481700410456	0.886447894340751	0.846532745717961
ATP9A	2321.44235958988	-0.328861101520739	0.000541564640415993	0.0194120044903496	6.56993465734297	6.6139372490838	6.32414863318374	6.35897980675815	3.03165754510684	3.55355829488499	5.02367309276732	5.2933374464618	3.90724686992731	4.12109457742633
ATXN7L3B	2790.01674730518	-0.479089642931969	5.79791664141706e-06	0.000462277792702253	16.1082096051508	17.3132866678853	16.2068356906601	16.6092713745936	23.1208199164969	23.2612335750457	11.0749660001952	12.7408082286408	18.2672143063819	15.583947641782
BBS9	1088.53284310382	-0.407656311932638	0.000460940273213424	0.0169846356958916	5.53572917073224	5.55122645852636	6.01745530789785	6.27068965657005	4.42827149624342	5.03036309304908	4.1493048615001	4.67791521638873	4.3233735166075	4.58482873729648
BCAT1	7304.95542708194	-0.497710670695618	3.06440006287227e-05	0.00186199327240324	15.5661588626444	16.1064621087853	14.3908749710672	16.5901292384188	11.0482589960292	11.1199257795052	10.2646166700958	11.9789272286386	10.7945551019728	10.0729318977671
BICD2	1691.50634442748	-0.473446063323192	0.00182000571068097	0.0455558856678107	5.18194425005538	5.27456146058722	6.42854984513025	6.15632016264296	3.02708312195185	2.73156662167878	4.37688749591391	3.91726407647798	2.3428845751636	2.39066109136669
BIRC5	3335.24980917711	-1.18656867427524	1.98050642918329e-07	2.63181931585372e-05	35.7464355526632	34.6678966695282	24.8544011580393	24.7653668877948	18.8946197869202	16.522575099372	12.4072315290995	14.0791443732817	12.5041737169609	10.6587541475561
C1orf52	384.935585092793	-0.542459761051592	0.000267207009155543	0.011001255830346	2.24020703304299	2.46981095479004	2.66302245139423	2.67404679793491	2.07421841430826	1.97520619226186	1.77199574103498	1.67752358129242	1.4780675943215	1.48580947208326
C3	31.6502998443668	-1.25943799508149	0.00146967569670045	0.0403728559034771	0.180632108479255	0.122115363049304	0.149280511057789	0.153110427811474	0.0897683285844027	0.146836202524648	0.057448422381483	0.0699121113097669	0.1653502879462	0.157824010476772
C6orf106	2464.89352004501	-0.541269440564151	0.000193641448726179	0.00857742406349428	10.9843942171905	11.1104478007749	13.4219479113164	13.7343719007617	13.3743896707949	14.044090169525	8.17526136960064	8.76112565125139	10.2184412161047	9.86952841493038
C7orf26	1980.16047409448	-0.45348210584138	0.00126653070546198	0.0362547187053871	17.5405235102193	18.7721073720604	22.5023781843729	20.3440547190514	18.1350766149245	16.7952800985791	14.5432936465388	14.3729735283932	15.3155116746313	15.2005608768217
CA13	656.126275257903	-0.675142186328371	8.33877335700228e-05	0.00432689684191118	3.99546762116244	4.39581349086655	3.30860077101077	3.68384532097439	1.77999277260603	2.25077670347724	2.3373795961512	2.48965098643738	1.62472410659853	1.58891523076819
CA9	105.885248459541	-2.26599266827313	7.28717528149977e-05	0.00385465630990659	0.963621601575401	0.88721447552887	3.17112951222931	2.34320425574304	0.0156028944758909	0.0277096301289389	0.438728130449064	0.323233293010562	0.260028705564717	0.228027258380291
CADPS2	450.755359288677	-0.495669652563155	0.00107711912124838	0.0319648379575575	1.57193740572263	1.44479678917786	1.67616845646406	1.80005716401255	0.899802783499308	0.922730683293667	1.07412749178909	1.23425757180856	1.24078525089812	1.25100471752773
CBX2	2240.32850184648	-0.831389623510231	2.68585176382898e-06	0.000237562772942978	9.43089672134308	9.09687691165293	12.4333128570192	10.648896181858	9.52210046166505	7.96400061321515	6.19260014071399	5.49386610808484	6.47861832198767	6.5810693271809
CCBE1	975.363878400445	-0.498166133526893	2.78758726120373e-06	0.000243653014889706	3.32049226319217	3.39176708347711	3.4829085771274	3.47479421072559	1.20459828799221	1.04900426455377	2.2753590228689	2.5734223786507	1.13931203499994	1.11190608020102
CCDC28A	240.465919204017	-0.555485932160794	0.000554723485130016	0.019668015974946	3.18169044183268	3.77023020623079	3.64009058864856	3.66388640669666	3.29018736440742	4.33198206261086	2.4018605537285	2.44628833119357	2.40397928822418	1.96261963830523
CCDC86	737.044536575262	-0.568914652041347	0.0016402967592444	0.0427554887470781	7.17503558274766	7.01650756024482	9.55643554364126	8.77878092879975	6.20913120397805	5.37458186249297	5.59655973452245	5.3684799010114	4.62240705941266	5.15013425751218
CD163	15.6628666060018	-2.06333622178644	0.000663704151548329	0.0224759231842759	0.10211169238651	0.0717933414608912	0.103775135378443	0.118923281935739	0.578684916838531	0.472743484519587	0.0263865128575571	0.0214074555633487	0.303786758140775	0.199346980297615
CD163L1	2726.23448334214	-0.547149671502556	0.000143664800658948	0.00669003181416096	11.5929239621054	11.7458276480259	14.2585146171168	14.4067227574523	12.9797132787723	14.5065820816689	8.70937690484478	9.09720057702691	9.20588965843087	9.85952744519898
CDS2	2061.51389259625	-0.57227276457329	1.2048977990877e-05	0.000875291312270595	4.60446370341961	4.45536991754191	5.19472515240981	5.41461581429098	3.40179583871276	3.67653857292882	3.12479087397605	3.50014539088649	3.17485761758925	3.07326837605924
CELF1	9414.96007745272	-0.647601547686891	0.000377750127629269	0.0145965149789608	19.0930835558188	19.9213562768765	25.8557934111834	26.6375995683168	18.7384961385276	19.5186527122406	14.3536298016171	14.8499728699843	14.586500657346	13.715253488534
CFAP58-AS1	19.8641427339468	-1.93406622353039	0.000183743312077479	0.00829397444245955	0.492912432142256	0.508288035012669	0.496171307795813	0.423925034791135	0.357557943086222	0.198436706084659	0.135864195235839	0.115738372658621	0.111728463165227	0.139968805604861
CHIC1	856.887415277672	-0.537924289566366	0.000806576835451926	0.0259642088877664	2.8122117691436	2.80907711657604	2.29031115002681	3.03435714110684	1.74594494096821	1.58146824262207	1.84372388423534	1.93245930924728	1.8901297112896	1.7823119586847
CLDN4	308.068826129942	-1.47923278718968	3.10935731242181e-07	3.76462557566922e-05	5.33544281636888	4.69594195099895	3.92400152351772	2.94120663190185	0.503212520256859	0.435076000315055	1.5900600074604	1.45004820796764	0.286897865091121	0.414708230697089
CNTNAP4	259.197936829042	-0.840619475912048	2.23368149790472e-07	2.94431645832682e-05	0.791589701980521	0.807620618735827	0.89330830454171	0.880529727444723	1.10382992786787	1.11587639245954	0.42846512473608	0.51514032654821	0.902808447224927	0.780000791377883
COPS7A	2190.49458753009	-0.791461826490554	1.45336990190375e-14	1.13120624031509e-11	20.2554932879525	21.4245762263425	22.8345603018922	23.106021760263	14.5271002860968	14.5528573130885	12.4869068416401	12.8494699588739	12.7711773212171	12.6060986901882
CPNE7	54.4312832820133	-1.90014643792013	0.000312193988244227	0.0126620613842478	0.415985689502065	0.254735312993057	0.81045670900784	0.670809114847564	0.994697735676799	1.37755553019629	0.166442587690123	0.121531825260652	0.35739511849898	0.476308349270085
CPT1C	79.0182313949753	-1.39174584365834	2.11527918828701e-06	0.000194237294003096	0.617066675000571	0.708490922096457	0.618077920733017	0.559915806246044	0.800786723917302	0.991395833114292	0.181398547426066	0.296237308233878	0.42987724302933	0.538532461281113
CREB3	975.947784900783	-0.413695345680947	0.000705330302077257	0.0234321621696194	10.5266940003541	10.9832629067549	12.0251383686644	12.0207997355229	13.597125953606	12.3180308936718	8.80016100881299	8.30583832096589	10.1294034748608	10.3377284787901
CSF1R	33.5019112118024	-1.44119354149766	0.000580072141365048	0.0203898476357241	0.226050964964294	0.168282378573484	0.216219700266374	0.223956335458871	0.0180857021498268	0.02141261323738	0.100791842997249	0.0535239614980194	0.0100468574949669	0.0314657206367632
CSF2	28.4920885480594	-2.40958918176135	1.22492434423832e-05	0.000885902141883865	0.703996163698717	0.734471795815933	1.26607553699196	1.24511102973288	0.123551072690621	0.027427238993867	0.234733522023703	0.13711679818155	0.0257378731495268	0.0644866896311141
CSTB	1157.0501637679	-1.68035491872506	1.09314090904994e-10	3.88421481704809e-08	24.2750633247931	24.614487142341	38.8120057735189	39.0842533904542	31.417789130767	36.9223157102331	10.0562088283569	9.69493559908487	12.7458602558196	12.4131732325296
CTDSP2	5479.79303416536	-0.490022455105327	3.4931943070821e-09	8.28919464206462e-07	23.2745329819553	23.4599044685904	24.5497595160952	24.3417698678924	31.7576403291114	31.2533661514785	16.3453321365272	17.7607680034997	25.4927481066426	23.5211025494403
DCAF12L2	76.4015870035949	-1.0537522790714	0.000413661610806588	0.0157606037963489	0.733931881615432	0.858421667441995	0.541739708899504	0.678405107298497	0.988907729760159	0.770421540110526	0.311954438272362	0.365829446475786	0.559717041327916	0.769361688625153
DCTD	1117.60276321527	-0.778795931267354	6.26623546261182e-14	4.09686474545561e-11	12.0214390251384	12.6075775971517	12.9181917624703	12.801657198596	16.4693670653997	17.112542103982	6.96636674910893	7.73100589159444	9.83496818797466	7.84617005659862
DCUN1D5	865.183479923365	-0.413133348735791	0.000200614821495315	0.00886229529011059	1.47505053417623	1.4745789251036	1.47609142697848	1.3931354121031	1.66809590554865	1.54830877672001	1.06525309367469	1.1237488118985	1.13024054875479	1.04123268867566
DDHD2	1211.66311993078	-0.421240253721062	0.000340024479428409	0.0134895633889742	4.58928119775187	4.71538931513073	4.40316402555393	4.40356344220118	3.19016068288757	3.36133048011714	3.15074154263368	3.62883020083694	3.30100237710023	2.84880320155916
DDX47	4300.6399036633	-0.519089692692579	0.000897894964329154	0.027986481445801	55.0213615411364	57.6270637824334	46.1745366627084	49.4048426048756	34.8023720553186	38.4513437369577	33.4254334366124	39.4825820586586	27.1650715035062	25.7985798347568
DESI1	979.298792613096	-0.384137632476099	0.00198871661834011	0.0483713885815017	5.58679561387805	5.96633133349113	5.36468502074291	5.23828339999639	4.42247059218499	5.31166002191188	4.23510254337546	4.26499258866677	3.24311447739286	3.09549707844452
DFFA	1027.02560546943	-0.522716479810997	2.04727043275001e-05	0.00132714455490005	6.35740334549524	6.42026361937974	7.37786115725561	6.51822743898752	6.531584080813	7.44965198477979	4.60528767877214	4.68974069112008	4.56128514693249	4.61760238610416
DMKN	971.299465624472	-1.01757817998605	0.00109434406535675	0.0322289256725334	6.27740956972651	6.79085460027008	12.353150020234	11.1694746244431	6.02348018524712	7.08057535366512	4.2288132573726	4.80318810349232	4.89968521678344	5.06020899837052
DOK5	445.05480691775	-0.721433106314194	0.000672982147630649	0.0226063261086998	3.26183742702734	3.74529767919273	4.84797753462385	4.77750760018018	4.16852114880249	4.15096611109185	2.45888889157126	2.58480786420562	3.58101996434298	3.78163093462034
DOPEY2	498.441147188658	-0.515317839197103	0.000959281107815952	0.0290898881396136	1.28910965307042	1.24683819327087	1.52895656032368	1.53251116749158	1.10395900925211	1.10384055723691	0.998762546679733	0.960919278163014	0.932780437814185	1.026515261613
DPAGT1	817.778881504531	-0.455148768307389	0.00152501535177286	0.041418037137786	8.755370499468	8.9762066313846	7.71385483424637	7.75723935190722	10.7084806361791	13.1373529745623	5.81529835654053	6.32319470605745	7.11204002729851	6.90085854213071
DPH2	1076.15305339043	-0.538518689707245	0.000111265556563051	0.00547781783741887	8.19632166857238	8.52325208136448	9.83458911804832	8.71198431172777	8.5318154307535	7.32048974918063	6.38132261818905	5.76031211048077	5.07165887873573	5.65908360592066
DUSP10	813.922881916403	-0.845272897830431	0.00185340620707374	0.0458751523413474	5.61895569026737	4.96229737615214	8.37904173183642	8.72851918138591	1.1955190767338	1.32893888280546	3.58032919896051	4.12777651209434	1.96286533687096	2.16317750517519
DUSP2	245.040056900445	-1.40080215206409	3.93940695831317e-18	4.59925762383062e-15	3.45960170844534	3.67463317893769	3.63730603085376	3.75337187702685	5.32424466809955	6.15883941727563	1.4216353663216	1.33081956692034	2.64993170524965	3.53002435302664
DYNC2H1	1760.67728092945	-0.429660705903222	0.00127083740591379	0.0363144010483582	2.52068751599779	2.62408095745496	2.87027914769778	3.12817106451012	3.74703869617391	4.07849791031692	1.94636567632027	2.19610583962468	2.60756839088731	2.69572862744943
EIF2B4	924.263717752	-0.39497629557326	0.000799242124255832	0.0258685396454685	8.97366808718771	9.40346232566065	9.97343526239706	10.0167789782073	8.2654565559223	8.24258620659948	6.79668988974369	7.81931570729311	6.68278788319753	5.72366009837009
EIF3K	2299.74506580274	-1.09065320622907	2.82813681051908e-23	4.20235419708494e-20	62.3845171792586	62.7959260277321	61.7690324276566	60.7140284114954	28.4283339555034	28.7152135372128	26.8041761937738	31.4995006617594	18.846723339128	13.9735001795573
ELL2	2492.36416943351	-1.08108730710961	0.00169188139370312	0.043549293511933	6.40132586749481	6.96973899151266	12.2158306482024	14.1755922635541	8.13710818285137	8.70331708555963	4.29425294470967	5.09164610647368	7.26496806785493	6.96618371350865
EPB41L4A-AS1	315.282063940108	-0.568057019242052	0.000377152716726565	0.0145965149789608	5.68851495703871	5.143736367719	6.39897003110652	6.22780433927875	6.76232582845308	7.33908351955236	3.87359459898997	4.05665904167778	5.88867017335656	5.25723146456671
EPHB6	555.433662874859	-1.24245337209718	0.000774496257595855	0.0252174130087734	1.19417409164571	1.04333585810187	2.42980503119837	2.06021381079576	2.05416399885331	1.56155588688576	0.782806379781669	0.633988610727587	1.02999032075664	1.22799459647872
ETS1	3942.0237452654	-0.330404526081021	0.00138964467224804	0.0388269096887081	13.9589965135883	14.8528742617546	14.999802948471	15.69402042344	8.66206654958369	9.6986116267828	11.0389357083942	12.6710090904792	10.4823794911559	9.88262526114823
EVI2A	87.0475373308909	-2.48009011932985	0.00137092428788006	0.0383694477489719	0.284284379468092	0.199876478884474	1.21069349522986	1.48353223173274	0.330273361673393	0.515012474396465	0.128557545201354	0.15495868498812	0.120822640399606	0.0672718290503981
FABP5	690.8382966253	-0.95944829628895	8.53115173439618e-07	8.82542247460162e-05	18.6073881218024	19.8210841560437	23.9346658565662	27.0826093604125	8.92259311378765	10.2792113966549	10.8895802994088	12.1232382961294	7.15854402106161	6.3364127215853
FAM134A	2578.52272690225	-0.79712185917315	2.47991161449841e-14	1.68892313912402e-11	11.6789985209479	11.6146633793749	12.8439622471072	12.8792847641569	4.44576416024427	4.7682656172125	6.71161847025663	7.41748489050411	4.07081527669679	3.9525664329627
FAM220A	1360.23406135628	-0.443742647282276	0.000322591630596632	0.0129626466385958	13.1649252003848	12.0810239938817	13.4951200213163	14.6377239293043	9.18841347562485	9.37456587001756	9.36310034494953	10.2985718634198	8.38648950233327	8.84856995324495
FAM63A	651.603821820089	-0.801793120753485	1.32157765641474e-06	0.000130127631289753	3.72906982331096	3.44568403495126	4.47163415891821	4.04893189039068	3.83245179901249	4.40266561460237	2.04259184364001	2.47053427709481	2.23964473904822	1.90789943181569
FAM65B	57.9199487936019	-1.82060488836007	3.62101493042154e-07	4.25794885163598e-05	0.157798800545063	0.137933100410408	0.210523550153979	0.215491000290809	0.00290034665257589	0.00772621385532974	0.0573075500538729	0.0450632061009342	0.0120838698698436	0.0242210772059448
FAM81A	167.731133610372	-0.803349532541159	8.97139755549359e-05	0.0045539594113212	1.03322575705252	1.22158744285543	1.08065613389984	1.13287588744014	0.370555246488848	0.670496344261834	0.54195827879002	0.739717713373219	0.518505336675804	0.467100819934714
FANCE	430.277034276463	-0.579825968641691	0.000374744196802953	0.0145491541490363	3.35608094779597	3.41432834478	4.17353789723928	4.05801755621125	3.60619226845522	3.2105971720081	2.35831395052346	2.66809790590714	3.07610396645998	2.86296924523732
FASTKD5	438.725713416059	-0.82631869766372	1.79163280040281e-08	3.48621882411714e-06	3.52430380373595	3.64241081324927	3.37740832375399	3.65492824922308	4.03973816046453	4.4820496107826	1.789238439093	2.22441633096074	2.53346794328812	2.40468005065237
FBL	2839.51790926933	-0.611269270428688	2.05425250773761e-05	0.00132714455490005	56.9698880852417	59.4312264800982	50.4221601266142	51.1120016151366	66.580108799738	60.8025397317686	32.9780449643129	38.589061022994	43.8249701951507	39.4113309733091
FNBP1	1179.40112304877	-0.826052572327316	9.6204862229062e-17	8.73593596185565e-14	4.97512948175584	4.86570273516673	5.20979873185604	5.09063312611687	2.92750565901845	3.07180021019053	2.81918205114366	2.87031164193379	3.17308835389244	2.97200430567654
FOSB	1243.68048204158	-1.03075229246123	0.00081952689549688	0.0262136342600714	8.52164574433437	8.49093473742785	9.34384534616619	5.00948093366715	4.26375537137576	2.29216467407166	4.56760600217521	3.10709714947149	6.25496434421623	3.2845345824428
FOXO3	1351.9195863669	-0.444022752050527	8.00754013109165e-06	0.00060594094186432	3.74570485969424	3.79977107140447	3.94379490900424	4.10059598901862	4.20313894455641	4.55241564879554	2.74662211318828	2.99308280288589	3.49430743832748	3.20167341030559
FTSJ3	1945.47079378484	-0.382794014330074	2.78495164531103e-05	0.00171456798035325	11.150014378892	11.6006561741994	12.0603344322182	12.1322336233505	12.0996040673192	12.510489249189	8.87934454516607	9.14362411925382	9.06039667156958	7.56699390945375
FXN	419.891238002707	-0.555598382469207	8.79150713104946e-05	0.00449787926791324	1.12644443591726	1.30484606788078	1.26111444813905	1.30354531131735	1.12874612441514	1.21025359721864	0.79599667778282	0.904914456472284	1.02186676539264	0.797973039287616
FYTTD1	2142.92175929655	-1.70891249973837	2.49704674814967e-32	8.16284581970128e-29	12.643462880548	13.3896047327109	11.2568264903381	12.7664870387465	13.5615446827643	15.3334999764079	3.4479314402495	4.23157760774997	6.46590363483241	5.97613466389227
GALNT10	2448.60610992884	-0.41802966882069	0.000153501141753348	0.00706109092107838	8.66053903058208	9.24837082681684	8.38655451739197	9.24616035597606	10.9528389020634	10.5826078757369	6.23192864793038	7.09745406002939	8.87221873291685	7.92271232038887
GID8	2551.16672132702	-0.938311390403134	5.48811144279411e-25	9.96702017027441e-22	13.5222644577973	13.30118821237	13.9471719104283	13.5068050953895	10.954098945351	9.56149361003497	7.13005061515436	7.05096885159927	6.62216813708409	5.96898821101008
GMDS	300.080659806252	-0.516466417328631	0.00207159338963292	0.0496483782310117	3.68694765057316	4.20171210761054	3.45877809164743	3.65876209004394	2.50734968115186	3.03382664052615	2.41848881910046	2.83361731696589	2.33037430439934	2.54548383261226
GPATCH4	622.282121759488	-0.550453862437053	9.35156650629695e-06	0.00069477888429738	6.25392655203414	5.97905830513004	6.89866739090081	6.43870981882884	4.96189421106761	4.90553033020933	4.28385954566552	4.46196937377178	3.18767440538687	3.05376643937596
GPD2	1917.34856354095	-0.607279852459072	5.0680786416735e-08	8.62893181230764e-06	6.53125656599867	7.07845798880762	6.72469781945858	7.53520148829598	7.40209932919403	6.85614133484382	4.34094933295662	4.8207711776589	5.40311344845411	5.11566465413227
GSKIP	268.311584799891	-0.937997140630169	6.41050565417005e-08	1.03742291997435e-05	2.05498554802823	2.20336937367786	2.24509679888738	2.60963578468552	3.37150671253469	3.24196683395445	1.10851552844731	1.27308040674747	1.59392163634759	1.60473361661288
H2AFV	3542.24186672338	-1.6092636309008	1.88106955721072e-08	3.61718610736578e-06	24.0876721179518	23.5703792426583	14.1558764600536	14.8096455063985	19.3346331752274	17.6810943926758	6.03251179367463	6.58618756061285	7.72691550379655	6.6613626258722
HABP4	256.562119584252	-0.604000349629034	0.00205099030986677	0.0494445967769504	1.87969489523067	1.88126391945675	2.31529901789032	2.53854609052812	1.49211680095597	1.55115702107153	1.38977218658574	1.44727252114391	1.70579806567924	1.61458700399103
HEPHL1	1126.67993716422	-2.25407137418358	3.9595747466899e-07	4.59001767621606e-05	2.83686248509498	2.86441478309487	7.1465843803929	7.60994174700628	1.15713645377446	1.35672886553849	0.984650127756292	1.15456368557873	1.22563051293541	1.1696407430782
HEY1	95.656405660962	-1.24129819366872	2.41032396834904e-06	0.000216465633311346	0.753740480828858	0.943204285297065	0.867418897289393	1.07793519036907	0.752425074182605	0.876916281640606	0.414562345141163	0.35489210080155	0.297812550834129	0.382905353579628
HLA-A	1538.84272758347	-0.446304136622678	0.0006051358424972	0.0209553926813914	2.55619920194443	2.36712937472597	2.85007392545332	2.602316301371	1.78164280111042	1.43335414956077	1.97162134228343	1.83876555661979	1.62254643755135	1.91678779204587
HMGA1	13239.2456855258	-1.35345836490056	6.92335808450203e-07	7.39622796674416e-05	103.352030349968	105.14915110971	182.390545122608	158.382293697073	96.1692592541135	96.4112591298601	56.7615486971737	50.4845959104709	46.116155939079	48.5127992204069
HPS6	539.493929400907	-0.655799318174311	0.000274521942201375	0.0112740229780942	4.19655043665126	3.79957930364456	5.24614453714987	4.97772130656463	5.00908970979604	4.14975563033142	2.8550167411109	2.93395908384418	3.00946246560878	3.48594964458014
ICA1	81.8784384703487	-1.17020607425263	0.000125355769588603	0.00607994081283596	0.6378650631375	0.700741009879645	0.725429508903567	0.907174030454783	0.596457424161489	0.778399967643682	0.247244477539689	0.414553023201395	0.76810715731741	0.537729580235595
IGFBP6	405.162095924497	-1.04005211158218	0.000731328612610504	0.0240031449259412	7.82468720782345	7.05843990650004	14.1466902975228	11.129952113606	4.06624997776044	3.03119258280045	4.74970889051378	5.01413136207378	2.80265722215189	2.43677576424404
IMP4	1096.55380159071	-0.37178888536575	0.00192489573125487	0.0471700460680072	7.46643163479928	6.63059887649208	7.51536968061664	7.37613750575143	7.08697914219479	6.47240514269158	5.7156525883503	5.50364539367706	5.08847284711756	4.70285106774315
IPPK	635.4815378205	-0.454029352663391	0.000230850488805999	0.00982617510295327	2.91648255691533	3.03024126303952	3.29332588984077	3.33132978302764	2.09908387728212	2.4803235590466	2.20231353280634	2.39274161243913	1.77665011894126	1.92090038109314
IREB2	2061.68002344333	-0.578664855985159	4.01952495465978e-06	0.000340410027895928	6.51498937157899	6.64507194745015	5.68024958644662	6.48004259900815	6.68187331754891	7.09554373747245	4.06030982193313	4.43594518043578	5.14938690593825	4.65823515556026
IRF2BPL	1391.31733144068	-1.54817556761996	0.00145606444003894	0.0402696671276421	4.74300254747036	4.2694327501917	13.6377101571793	11.4611622523502	16.8275921998597	11.876152832609	3.45304473707781	2.33898982127753	8.56869334487692	10.4239778601211
IRGQ	2315.38435847326	-0.632407667608417	1.53759629523946e-12	7.39176807226148e-10	5.17492752732069	5.20920464498506	5.50183142633295	5.5850766703601	5.1537486336312	5.58763103974466	3.41063906179387	3.5241838640704	4.49469562921707	4.37135810498557
KDM1B	531.320781664931	-0.777261389319338	4.64227306273435e-07	5.30615057415335e-05	2.7879127161966	3.22162198191666	3.02969833944859	3.58075346053578	1.83963561717861	2.39473416902967	1.74517558780435	1.93977512575848	1.64762240347655	1.65256503150805
KDM7A	659.769819032171	-0.485065388319313	8.82399023937075e-05	0.00449787926791324	1.63352655133045	1.54864526684175	1.48670704042955	1.62039624778793	1.52963106896867	1.65852914637189	1.06608354383036	1.18645072908981	1.28340230292511	1.08657050751838
KLF12	962.037363896388	-0.577555909196478	0.000127557810126663	0.00616843907254529	1.94464474825213	1.81534466625184	1.84108919554674	2.24870553487154	1.44916834779801	1.67364235525138	1.20265157328342	1.43397180754782	1.53907007800867	1.31091112928041
KLHL7	1062.64828203526	-0.525562631323639	2.8327248481529e-05	0.00172764506130818	5.89297104769926	6.01432215384302	5.34713660742628	5.62352750591259	5.50338828644796	5.13930706331573	3.73663880465535	4.2295546275136	3.99345771114201	3.7351232618735
LBX2-AS1	366.878899278989	-0.588337353410124	0.000117549233694281	0.00575252163093718	3.49406281012232	3.08102097172524	3.60171090517798	3.16937624903182	2.93061731833328	2.98031837682846	2.12932730033384	2.32209266663182	2.433747641732	2.95588131667649
LGALS3	512.402927393335	-0.760335253270376	1.80061334336674e-05	0.00119153947762467	5.12963175603337	5.01356834535224	6.63797508104885	6.27557979403428	4.65920785396544	4.28496830379183	3.44143507031663	3.36804337886226	4.47662360338975	4.24331901109441
LINC00460	282.863363527305	-0.627916861005643	7.58429857286429e-05	0.00399888258624087	6.90454909050033	7.2954550320771	6.3204215384367	7.25500078915663	2.59977681129363	2.59118390275756	4.19335771072541	4.80871411565767	1.8126333639333	1.32924423703522
LINC01204	335.835729974016	-0.904202956144941	0.00135879402454391	0.0381606328714266	1.88089953714283	2.16688123400817	1.26339317356613	1.34398232141344	0.585624231731129	0.989850217459802	0.882289706403075	0.900773118562378	0.492264088680833	0.493350500546511
LIPA	1153.39088414559	-2.03461491395785	2.83220045937172e-36	1.15730791271077e-32	11.035761675185	12.0357951147822	9.74861353494136	10.8759171806926	3.41175471539744	3.37640801405703	2.37506957837087	2.9738504525048	1.62038940730855	1.5315300178861
LOC100506603	283.258215021195	-0.515014300031395	0.00114462304044992	0.0335592429791365	3.20170204951002	3.14198124735856	3.59511411299942	3.58757774118718	2.34180566834787	2.96729092945585	2.47953999281468	2.25824844319262	2.49949242338703	2.11497447355002
LOC101927040	60.3333046353197	-1.40047850913326	0.000114992446551494	0.00564429891556808	0.538681764053482	0.757479636691556	0.596337219555203	0.959152074506775	1.41955399146661	1.7891158354073	0.234899763894824	0.304919791990133	0.381571868222446	0.382413985725587
LOC101928069	32.8612122525093	-1.36049955685554	0.000341857081651544	0.0135294285704467	0.94824466112473	0.888930557686567	1.00346338549267	1.01941192985014	1.00312225832589	0.610790996033633	0.435616583424602	0.318075314930606	0.620933795486811	0.747961751779323
LOC400043	305.432931049468	-0.688828874618433	5.71563587977857e-05	0.00319938590599249	4.88165867980886	5.60657105286702	4.60124674323468	4.75345571418578	1.52955342320217	1.49709470479426	3.2097916124467	2.94489859320268	1.70903167730514	0.961637534803765
LOC645553	443.087460640376	-0.924372318323806	0.000802834550581198	0.0259334599392286	7.49297855458585	7.80701640152173	4.86153624878263	5.11764631352746	5.3095397114309	6.79700034956588	3.00384661577534	3.68828062261869	7.60731060307318	6.95899246195618
LONRF1	544.812078501266	-0.545431932933121	0.00130360690833387	0.037121001597068	3.81683856657856	3.48616247427172	2.93791875974942	3.34102554746708	1.73045562706071	2.27754399966702	2.3806415563662	2.28228235280702	1.58442201901868	1.48510390450893
LRRC41	1551.23129361142	-0.517109190772785	0.00193152863197665	0.0471916969868915	10.0745527076511	10.4165895913441	13.5345017415059	12.3388956057274	12.4606684170742	12.4449701383162	8.25695866132122	7.9413091348448	9.33451894005412	9.65047247780143
MAK16	703.517422083617	-0.745411366660428	1.2209268030301e-07	1.74958667761297e-05	4.49914764003602	4.72739936313291	4.02061935621766	4.76174329090378	7.23879132136969	8.65673190006621	2.52115230642498	2.86107588818946	4.09285473581479	3.51974811501553
MALT1	1430.8806899053	-0.548303800988938	1.12953796304277e-06	0.000112574987841062	6.07819172246194	6.27941959755847	6.10053966811771	6.7286862028963	5.43747534026299	5.49602609770939	4.00402655196714	4.62573831956775	4.3340685140649	4.17153882483022
MAZ	4089.22114295483	-0.574377773810664	2.55925512923263e-05	0.00159660401096593	30.9246414398624	29.7467048802357	34.7385283655607	31.6981881644725	29.4081566284182	27.3927272635706	22.9285669572681	19.74530618763	21.1010976938368	21.8430347446502
MCOLN2	263.218082441033	-0.597747360348383	8.8334000917721e-05	0.00449787926791324	1.77591303412167	1.93257789962023	1.78020951883715	1.97000061773577	1.53850875733087	1.52324724685006	1.16919933241502	1.29765040918644	1.31404417404429	1.23664275214235
MED29	871.965976430971	-0.830179782314842	4.87787185299931e-06	0.00039666077331977	4.84508730701972	4.75200277475342	6.24957646291572	6.26093235735983	4.94740038721776	4.80478628585676	3.22125434211167	2.99399141836511	3.01876919995658	2.57189334964189
MEGF10	2286.70693607264	-1.18919062793417	0.000247098989894785	0.010338562376394	4.58834685336752	4.91610970871768	9.07144173683121	8.92462033763237	2.83099239871336	2.54295857600617	2.84061350799858	3.18266285346066	3.08730981601798	3.02997391570455
MESDC1	449.490726807784	-0.662640396080315	0.000544082440895654	0.0194595787668259	2.9682451037711	3.15504792627869	3.97688877807599	3.20357967335401	3.99744008581246	3.05560657824003	2.28293929826592	1.91683381528682	2.50317899038318	3.11099135695825
METTL22	469.993736300177	-0.527628252591204	0.00051952702178384	0.0187868786970285	5.6489305074853	6.40796704140333	7.05284852361441	6.81553330999554	6.77397713308994	6.43220180479293	4.61816198313946	4.37274039200851	4.88689823341281	5.31531539284458
MFNG	302.056692082372	-0.844294178982631	1.88609743738326e-05	0.00123313050456118	2.86266894793853	2.8870267157225	3.732050553677	3.66969204635003	2.03192637864263	1.4817257695212	1.93237558579812	1.73011528042591	1.41883640606591	1.52861531495664
MIR6723	877.444209811695	-0.544342381683176	0.00102131190954498	0.030573888574199	251.180421740986	212.090840676979	198.215505770357	209.522368377423	147.116010431333	161.114997959366	155.901301725641	143.314015267902	119.182258109536	183.433837794797
MKRN1	920.342571920551	-0.872418007474245	0.000372201603433733	0.0144848457336294	4.46382037250139	4.53368686967336	6.56973358367723	7.19065466287626	7.36638969324407	7.24131324171233	2.93305183772452	3.28241614261334	4.04405140923864	3.75449111755661
MLKL	168.216496390999	-1.30509178784914	0.0018552141754439	0.0458751523413474	0.829459538936593	1.06767114011617	2.0453645150671	2.03035916507875	0.442588331708038	0.454650169649588	0.52100928304581	0.687015358104231	0.231401350578423	0.398598829609643
MMP9	403.82098240731	-1.15169364521971	1.1864740401265e-07	1.71618745007678e-05	4.65516685521336	4.0241612361025	4.26344117111792	3.79853133655288	2.04479405353608	1.59450179433309	2.2165536796061	1.55127073970095	0.55354055951722	1.22437752648287
MPI	718.483615719909	-0.774477265737349	1.20736265884096e-08	2.37763164563318e-06	4.78850037551945	4.94686898820786	5.77815733720427	5.41499217574116	3.5483265388587	3.90779513323925	3.08179759925196	3.04010280415461	2.87351899260309	2.8061004080058
MPLKIP	473.594111230888	-1.0022927346001	1.44904709242397e-05	0.00099935336395231	14.1327754764528	13.50626541495	9.6596843158981	10.4480514519093	11.4148520944546	10.4791872852975	6.20746687438771	5.73833557533256	8.05163274005521	7.61213630977692
MRAS	867.766121905262	-1.55385045942371	4.99641762248911e-07	5.63216869238514e-05	5.17142966221976	5.61899144441057	3.16279611778919	3.17795603570136	2.61105885770094	2.532739117039	1.34083396246879	1.59236221844503	1.76580086407054	1.70353177129794
MRPS10	1155.89590199482	-0.493086419711194	4.76349328889636e-06	0.000391252752799051	11.3542992965068	11.948223626774	11.3784101706532	12.672147737324	8.11251354164611	8.21977691239327	8.12836117572172	8.71823629559328	7.19421662703385	6.72989421123402
MRPS25	1154.62495943393	-0.358202759575552	0.000968259791625341	0.0292536160704551	4.53273116143428	4.31966475218249	4.58901611486128	4.64455661589795	5.46721990084462	5.1112457342237	3.3036107582632	3.76876391115504	4.14825629203739	4.41260960987753
MT1E	3582.88403292819	-0.819721665268135	1.23097257831442e-07	1.74958667761297e-05	177.039335567544	177.106526755934	155.312497318238	143.831583806508	110.808802173557	101.83403846001	94.6406670038525	90.7941281213277	64.7172982365734	54.4661321836521
MT1X	282.741985238861	-1.06283050198113	3.4256291949773e-10	1.09788057239027e-07	16.2825813444418	15.2020327303378	18.8093044466635	16.7930452364817	7.32208306409704	5.96881894143758	7.52570778220795	8.57008271802632	4.30090053545682	5.3879906150947
MT2A	7778.83578700323	-1.13859872507947	0.00118366560013299	0.0343032167272584	329.225114869507	294.592011127857	660.207527931429	517.956632553964	393.679348925253	259.186753904	236.46713272514	170.959940128902	143.503078131261	172.344525693665
MYH15	1211.12702968316	-0.850897092660269	9.75549714704806e-05	0.0048912147505675	3.11985093877317	3.43026163295234	4.75345083397781	4.64900259916727	0.688949180254796	0.642198293857669	2.24015550916316	2.17839774210235	0.588361813261235	0.551017522583078
MYLIP	403.375812175537	-0.519000836725199	0.00206498691317697	0.0496483782310117	2.67027672725714	2.69371141967802	3.07448984601679	3.13279128269412	2.42390025749563	2.18038065508554	2.20806967900382	1.828410012873	2.19082016628201	1.94509998714754
NAA50	6310.40674434183	-0.520474961774156	7.82783502087428e-06	0.000597878333720514	21.8351805522562	23.5173794381417	20.9812369757661	23.9032900831697	14.3710104958955	13.8095035215654	14.6305860410889	16.8968629733156	13.9068079530657	13.5224976483082
NCOA7	942.922772548417	-0.485725659151383	0.00124788403408561	0.0357836219949636	2.64215748993691	3.16228465850247	2.63249097719642	3.24158865228317	2.45520845412568	3.17886005445251	2.02220721646102	2.15141446786156	2.18872019566426	2.07972082028049
NDRG4	588.732806568471	-0.837078580756945	8.16077077449312e-06	0.000614690314788434	3.00631610540208	2.68646320523397	3.8471802101576	3.13858748840521	0.337465525616346	0.304651667645864	1.81231049571722	1.7394314925892	0.506160261103429	0.499057569663198
NDUFB9	1793.10547414465	-0.505073493888464	0.000687254008656082	0.022924830145885	57.4976524895509	46.788655907251	60.5329526345714	54.1896129675161	57.2617980951008	69.7416705133827	38.0833102608998	39.2222696550758	47.4054752747602	40.6947784232621
NGRN	1209.1818092771	-0.933790797388569	1.36124905005441e-05	0.00095491912974847	13.1170252953083	13.8585284091697	19.2585705307036	18.5551505995086	15.5676106577011	17.9949959202176	7.64284345430017	9.33666713072213	8.50644019487642	7.99598311261252
NKX3-1	221.699887864833	-1.00704116705049	2.71942527371229e-07	3.47257860147089e-05	1.3692178928816	1.83367327474023	1.56506899282228	1.66473914054771	1.65538102879601	1.75209148336469	0.741331531609146	0.858425266274773	1.17616824464319	1.03373283789956
NOL6	3251.40328507964	-0.416698070807733	0.00106614791224791	0.0317996124556426	13.496063597255	13.7142220862458	15.8076007266804	14.899924741995	15.5134181615979	15.3591973205156	11.3908395706948	10.3023368870666	10.4580727016309	10.5301794453634
NOP9	2030.36937978772	-0.399505854473026	0.000151959860938399	0.00701633877694389	6.70540628115943	7.20964900233509	7.75389644377467	7.27842911224788	9.04393647642142	9.74086812117281	5.40935885214278	5.57509232123082	6.66007397011055	6.18639499084454
NSMCE1	418.540483750944	-0.47127102124058	0.00132666549741567	0.0373868061297572	8.37633975041744	9.18210021818277	8.96853178766082	7.86809388568323	7.60284090317606	7.09570048358281	6.26364963641121	6.14873727438735	6.35424949253713	5.74383916095213
NUDCD3	3353.37142716532	-0.918341107639336	8.90763930435744e-09	1.81994205537153e-06	14.1289033058324	14.2392682413756	18.5242993503563	17.2316897838332	12.8360129213822	12.4794774128592	8.51062976174346	8.45711610992796	9.74668183076711	9.81658042956373
OAS3	545.672994506574	-0.634846496218393	2.01050511974368e-06	0.00018671423967165	1.7456387102959	1.97884137764731	1.90898365936552	1.75250394375984	0.997198426972116	1.00548638281975	1.17976756982763	1.19992690665355	1.04095311908006	0.896066742219025
OPHN1	937.351757115269	-1.05863817826553	7.64085289131871e-07	8.05740261345834e-05	2.48313937205856	2.51643717241156	3.34600023759457	3.59835761699537	1.78366505120251	1.91260469608473	1.28210446088474	1.58884765068537	1.80553008554784	1.75439588435411
OSTF1	354.553552811292	-0.849990678725493	0.000770628051251846	0.0251415478996236	4.57555131380186	5.63215027372014	7.25405998362208	7.70684735755094	4.24736218093901	4.52580776878234	3.18570753671087	3.79829891687735	3.84695933404009	3.14219130683519
P3H2	465.286660614531	-0.718511811129499	4.45250065139979e-05	0.00256253954743414	3.0814335912096	2.7463751357992	2.50530516624522	2.42606564616902	1.20803050611204	1.63639664474974	1.67216308793931	1.60515648506719	1.74617141423709	1.33182061916725
PAK1IP1	365.641592871124	-0.452291938751707	0.00206832764527499	0.0496483782310117	5.05595173428592	4.98003277113583	5.38761366156007	5.85844785050196	5.6603126471047	6.49511876735364	4.01810405492213	3.7678840115686	3.85164258888153	3.9109344027619
PARP12	406.225702782241	-0.587045074597184	1.88153607604621e-05	0.00123313050456118	2.36221833863538	2.54244443224527	2.32365384794017	2.3072654205744	1.55854665853277	1.50304304312412	1.51451354620773	1.66351043526194	1.28804630195353	1.17353543722797
PARVB	620.416049109358	-0.608227606332463	6.317801429625e-07	6.93050096424299e-05	6.17214720125091	6.04767452339911	6.86373823576444	6.46772751294052	3.60577719107626	3.984905068736	4.14852594068272	4.24533892712353	2.82784808858337	2.95994499206903
PAX8	85.3117620757566	-0.955430189333249	0.00154045097416838	0.041418037137786	0.562726498774488	0.525466472694131	0.525937821329044	0.368647510217568	0.245159757986908	0.334504094806829	0.286282276983532	0.225625606872107	0.274040116703038	0.20598368617682
PAX8-AS1	304.85393380914	-1.45376957579439	7.19540593809963e-14	4.35588555771254e-11	1.40810535915124	1.51350959570794	1.80574788332744	1.90778497497164	3.04332413958234	3.18692527707572	0.60212374016619	0.609498658006391	1.32042362855622	1.23241306601337
PDCD7	635.920018309797	-0.618992795799741	8.92886333799085e-08	1.36394646036879e-05	4.86475121412654	4.77440829801169	5.21453112149816	5.13574795889985	6.90581592024342	7.28000309934019	3.1411149066034	3.37898402253254	4.84022777217977	4.14600104968753
PDIA6	7885.30490960524	-0.578923916749093	2.69808764335646e-10	8.82004850613226e-08	49.7033971833865	48.5932688101851	51.0913018910236	52.397773194297	42.3030986654005	40.6898231445514	31.8306214850474	35.8582636118525	32.165274252073	29.6120079047682
PGM5	527.281470348208	-1.31115001452101	3.79021052568479e-05	0.00223649787156382	2.65963026222713	3.01144533625861	5.05544410749347	4.93764292445086	6.34138465175602	8.13355676196644	1.35798054038338	1.80039394856168	2.07610875820127	1.81984606448501
PHB2	6630.83022335445	-0.343819562629402	0.000132545863916339	0.00631621616825821	96.7945544659394	100.288738938733	99.6681700992976	94.6958092341175	105.389150626079	111.844593240437	74.6768180792635	79.85105542334	84.7513560267895	77.3538622659295
PLCXD3	318.399940728007	-2.18735415927098	0.000281571298406041	0.0115345435399668	0.451491397766172	0.456721240919153	1.65612776886939	1.8696902613119	0.0626615790555226	0.0584233150037339	0.207147252702013	0.27816691193311	0.399437557129334	0.37611680491335
PNRC1	1271.46968646658	-0.497732761466512	0.000366987272602665	0.014350255910743	11.9180972673046	12.5162922827007	12.8330130686841	15.067797261858	11.7767399644134	12.4660208736892	8.75111441072942	9.80656169272972	14.8524300526439	13.7650209981464
POLDIP2	2486.32061550716	-0.670974404374394	4.89522740868371e-10	1.45968209160893e-07	19.9373203744292	21.8622353678403	19.5935443158203	20.7124242541973	15.5119906559009	17.5893078247625	12.2866317862334	13.5479863077209	12.9478334529967	12.4844299116867
PPIF	2066.39462475641	-1.07875774156397	7.77304584410988e-25	1.27050434321976e-21	21.1898200137336	21.8318112493066	24.0655662050136	23.1547372269924	8.19986005616256	8.63172611917439	10.327261347016	11.0653775514323	5.87759430469194	5.21177028778917
PPM1H	356.457228875093	-0.656384747547858	7.18133038692851e-05	0.0038243269130837	1.41776267416816	1.34660288675778	1.14567258399463	1.27065528304017	0.754904229230223	0.746738548344877	0.802577351071525	0.845026414990993	0.8962999461452	0.869696478445753
PPM1L	172.544514817685	-0.587417431833849	0.000667274246182285	0.0225342924666311	0.330673305073851	0.341132976605834	0.312280159482773	0.348846173099448	0.243793028499783	0.298592460572912	0.215618314955898	0.228577517641213	0.352002280913416	0.340054518543201
PPT2	237.289474298162	-0.718467114002216	0.00168428877917669	0.0434814046872519	0.273986980520953	0.261277116101562	0.368218956781058	0.371291171152341	0.275565381992589	0.349922600424639	0.175780602966401	0.212332410798453	0.198687226506726	0.144574813978365
PRKAR2A	2969.12312792684	-0.839873307334966	4.35350040703514e-11	1.58128809228865e-08	11.1559849416672	11.1808381323376	9.65409075370112	10.5577384171395	3.16426699971067	3.26530281439416	5.62330888065308	6.29473750045711	2.97992896577166	2.83796210715585
PSD3	1560.06737788957	-0.445483875148286	0.00172517380854785	0.0440593217198666	2.53056580802624	2.72762193966365	3.02496573177146	3.18713606705158	1.55591778777398	1.63279956047822	1.9520211864231	2.2659397156372	1.78162092750599	1.70337981412318
PTGS2	405.653120616318	-0.609814673772929	0.000909230778548322	0.028093340407131	2.09099238917413	1.94160002691139	1.69128844790832	2.35456248457885	1.99673987664094	2.31452811055411	1.27136440205805	1.3814931951217	2.84648961882164	2.32660885954322
PUS10	352.141150051483	-0.524425857402541	0.000399694670687362	0.0153717868056116	1.72266760691591	1.92076678921499	1.86441440144978	2.07175947207513	1.53835858566104	1.52362395240454	1.2410289136568	1.39645774429124	1.71573259809364	1.58116705078925
RAB13	2345.22028917563	-0.372251766420046	0.00204895835071982	0.0494445967769504	27.4581557881812	27.0422633330113	32.1456412642145	30.6482568697324	18.9985904520786	22.5729857354162	22.0280428530837	23.3401216507889	22.1138484669674	20.76272001539
RFTN1	1150.43578603816	-0.873023676870461	0.000829760927711947	0.0263860746370657	6.72817807455736	7.02266985083483	10.8563060234281	11.2423274081154	7.64076133334297	7.50909746597744	4.79999557510628	4.97786808321712	4.95346888436729	4.21569381749039
RGS2	120.044263999476	-1.08150994967535	0.000797790548194521	0.0258685396454685	1.57141700434685	1.65262067680129	2.69939808936435	2.64050343429626	2.24508314958652	1.89786335600895	1.06464692988973	0.956770547311263	1.57144014396277	1.29367464587752
RIT1	886.558205701371	-0.749685845268271	0.00163660859904445	0.0427322165357532	4.69104615348944	4.68086674013064	6.75118291900923	7.24535095490842	7.32073824025473	7.87983552007366	3.18137761240887	3.77238602753435	4.20800547435347	4.23910599585285
RMND5B	758.563146714787	-0.566173840235855	3.12324567044372e-05	0.00188374356027316	7.92311094628663	7.09422301479091	8.64208522928052	8.32664958085566	4.67437824990835	3.72130069805676	5.46847740944346	5.34946495469617	3.42493364709835	3.32913300732137
RND3	4343.39587973245	-1.06575243499655	2.68884141905481e-06	0.000237562772942978	29.2776873139858	30.7386929902073	42.1341098283235	46.5434361114433	17.5178871305678	21.4153289090267	16.6410345738909	18.878920088779	20.5569227240161	19.4138362271098
RNF114	1297.87065306591	-0.449961319643266	0.000109896907538655	0.0054267823375206	10.5213260883806	10.9538440946285	11.8845335419098	12.4140984845276	12.4428751064721	11.6859271645879	8.15639520669471	8.61704320959551	8.6402363581716	7.60254156020969
RNF149	690.776610052138	-0.717831609213732	9.74684501229008e-08	1.44187650965677e-05	5.07540926099308	5.05073091394986	5.09268718043326	5.99227368360425	6.17609666433425	6.16604623270139	3.10420847015847	3.35458002289684	3.66916448708289	3.30885376142937
RNF207	158.759743101762	-0.963212524408803	8.21807882762793e-05	0.00429151752196737	0.767669840489494	0.909032789890106	1.1992672826109	0.907330527540246	0.799885076815667	0.737379006543751	0.473309320282999	0.496937611138121	0.427387397501837	0.573657091719745
RNU12	2009.23387374164	-1.07841706802247	0.00060039559906741	0.0209242346839164	320.646704738983	199.196809426075	441.210153315205	335.322213027134	279.897077763217	419.192214443948	173.754006562411	132.559275074207	213.432608622979	196.033044529966
RPL13	10932.6407510839	-0.473283211439436	0.000217556778855673	0.00945626253059426	49.2600059578933	45.9294205484606	57.1178675543752	49.7372072807245	66.6712737435189	57.206308598413	35.9408015387511	36.9227694417715	48.6380722630979	49.202791562444
RPL22L1	1072.18467847067	-0.63133171779533	0.000950529172216571	0.028931842308901	13.3460879431598	12.2806479430264	10.0925818781498	11.684098608094	7.08645171178508	7.24753638381308	6.58416538796155	8.78847268384114	8.64330803677899	8.07108605968327
RPP25L	327.247293245702	-0.493827853973498	0.00114907162954093	0.033598525554287	6.29283380738419	6.73328598105382	6.76408323415624	6.24338928942335	6.16073633788534	5.58773995146376	4.1969799920091	5.06276611071579	4.95021979495663	5.1448908823662
RPRD1B	1097.54294327619	-0.456235821438037	0.000432272322153076	0.0161312582319453	6.32140250279338	6.50002920807547	5.5453816961014	6.30087140236193	10.0444277936253	10.5149673336418	4.30207377502326	4.70725178881187	6.86693368694477	6.30814560470167
RUBCN	2681.34165550107	-0.548429403927494	0.00185493984420252	0.0458751523413474	6.91764557986748	7.28514636399093	9.55334969398698	9.13424690069093	5.50974350145413	5.86081685500069	5.5004340229591	5.74727671868662	4.60788427014667	4.36445308573824
S100A6	3347.68859367751	-0.568278637930267	9.5749469776254e-06	0.000704966253825618	103.516662561038	97.371865448166	114.077908823667	120.713895018517	98.2656130409947	99.0145414035034	70.5228169630188	76.5906730223182	69.2800990471603	71.3748689020335
SCEL	601.98034479261	-0.701644625732829	0.00194697735290351	0.0474975296018027	3.48693018164614	3.64439484496311	4.25536877199029	5.60215203259614	14.1828569607295	16.0843837850425	2.54179440734439	2.68035146352311	10.6344647418471	9.65836100816533
SDHC	1605.83846804414	-0.3848116406068	0.00116096982559897	0.0338254042770324	11.430580519417	11.6414395236817	11.5646479451359	13.2936414482534	11.1675535840912	10.5894483417932	8.67246193256555	9.71434493264757	9.91614365641572	8.98501849433031
2009-09-01	7002.03574058387	-0.633367774103303	9.17106925426657e-05	0.00462657799262306	20.4779816361628	20.306908346641	25.0633432077058	20.2802532390769	7.86538428026854	6.73653625417965	14.9976174599956	12.7563401654818	6.64529117822172	8.12739356704065
SH3BP5	918.773230243922	-0.542497627929029	0.000463403439167941	0.0170209645240449	6.30631990252696	5.55028358547002	5.60837549091094	5.34184454254933	2.84095433337394	2.87354080917059	3.5154955954331	4.34498566196074	2.33889939140769	2.23311662365458
SIRT3	238.998575961349	-0.666484091616937	0.000179814806032455	0.00816409167944577	1.60332422577768	1.8399208434873	2.05486415549006	1.94819385353165	1.63762646831315	1.63963285901137	1.09848332041451	1.24871414470758	1.45509447218371	1.44783951168685
SLC17A5	600.366494323993	-0.522538972320328	0.00151666978255569	0.041316612659788	3.58799298510551	4.63686993919873	3.71126510098561	4.03076830536639	4.75572833738606	5.08049462919888	2.6133051584383	2.95021093250965	4.13351485406537	3.82644051472129
SLC25A3	7237.96563793607	-0.720979313719094	2.25987628168445e-14	1.60598599235358e-11	82.5100405024931	81.5904715996203	78.3601129829075	81.2699011786229	88.6434214637629	84.2189929494151	46.5413655909368	51.8984612969926	57.2205229782532	51.6533793581947
SLC25A32	1273.94862458188	-0.533173532718267	0.000236497755992439	0.00998851633513286	7.95256489032487	8.09967748482401	8.70431017272694	10.1168107357915	12.2887004812312	11.8390424823666	5.69123349889222	6.37439485226544	7.49834821747505	7.15891153842436
SLC35E2	641.548649654506	-0.462824497272562	0.000190949999976766	0.00852753483502798	2.0179665196209	1.82074223861634	1.95507270486489	1.86475406874601	2.03691222194362	1.90902529104975	1.37877394647909	1.40624422638253	1.85235441312474	1.74821939739989
SLC35E2B	1154.83399637445	-0.417145555638784	0.00174148919167668	0.0443374467880923	3.5775741922217	3.54443641363952	4.28380856577576	4.0929634224596	3.54878547705246	3.11777851549016	2.87995771367573	2.92911672291086	3.63444095290031	3.28025864395115
SLC36A1	1685.37504114668	-0.541652842235624	5.11759748908007e-05	0.00291453417975658	5.37507570917393	5.61726266639594	6.51633422788266	6.49732335096111	6.8775006927514	7.95778468657212	4.17060102370865	4.07767228590884	4.77134675299892	4.71831418829457
SLC41A3	1172.13028394047	-0.629892378070463	0.00115831901269991	0.0338084361831785	7.85450070255364	7.6584123321799	10.8727763361091	10.1102217319851	12.6735604798897	12.0889332217218	5.97411855358974	5.81618396443113	9.86067220822007	10.0823275137666
SMS	6191.9239912074	-0.417371789571398	0.00132069200030387	0.0372827474006334	66.4513770841699	67.0793089382228	76.6636763654607	81.047184162456	23.4294387023408	24.7851114658852	51.5623644862518	57.6227938720191	31.4544381181456	29.3712500280441
SNAPIN	391.730574310749	-0.719390215828628	2.18293099377596e-06	0.000199329648565743	8.30345039760553	9.43618376786828	8.12872345275822	8.05219141851966	5.16283760026589	6.11937680650711	4.93944484509383	5.37160270442695	5.01264652114144	4.7398023374542
SNHG15	467.914080832336	-0.640816201796263	4.38393003370973e-05	0.00254096937592147	12.3434767046134	12.4870942599059	13.4083653538844	14.2006747787094	12.561282159978	12.8967796207961	7.36604315655576	9.49472639960975	10.3159831546391	9.83442093676991
SNHG16	5954.97060760894	-0.387298658397104	0.000413183227931584	0.0157606037963489	49.259554136798	51.903667562699	47.7338558416066	52.7300259714333	9.1522964140591	10.4173797656847	35.7060392880366	41.5618411509325	8.4542524462435	8.46692703014194
SNHG7	766.327405222885	-0.364516978005634	0.00195930261277604	0.0477269764617353	6.36202714717242	6.00466612363749	6.19001804022603	5.92996033812375	8.09136021220937	5.72051645584527	4.82699313029945	4.69938448476174	6.24398301917304	6.25208818184616
SNHG8	721.319711248158	-0.589046093661605	0.000141119628484452	0.00660916999306122	29.3468701487862	24.3388899479539	26.0910760399899	23.9948817736938	24.0510426196093	22.5738583425047	16.5809465003641	18.0263917738572	20.3347908774504	20.9357756837943
SNIP1	481.127916155938	-0.443138086670759	0.0020696115366061	0.0496483782310117	2.19111439524344	2.19377637695652	2.25715882583434	2.43463461552482	3.16447029475271	3.55800676793729	1.4925330926417	1.85432728224821	2.43942499779424	2.00069779535229
SNORA24	215.927830062678	-0.991321538880689	4.7661616065617e-05	0.0027304032074773	35.5179152916552	30.23449612846	48.839951118075	41.9873206770946	29.2443502782782	30.4055021594223	20.1145126066952	19.3088712553752	25.756538019368	22.0263887598794
SNORA26	217.470965595329	-0.805377302161111	0.00047121257784217	0.0172303570130431	42.521777803944	32.053961552252	46.6724823340403	43.3567591934949	35.7741118261984	53.8259565254639	26.1294966872369	21.0273854916256	29.3126949570574	25.5184931038206
SNORD17	1916.69456512421	-0.938605039924027	7.25379392011996e-09	1.53978261849819e-06	213.623117918867	159.397626507296	193.252363215857	195.288356282936	229.885147008042	258.09205483349	94.3098874846329	104.911707165618	226.509030515864	156.031259572954
SNORD74	70.6779944466634	-0.769118157953033	0.00208059864258586	0.0497911929913116	22.0361523193597	23.327019384625	22.7186557947212	22.0929218796965	21.8895607084686	23.3245811610344	12.0284629098118	14.4512218083472	14.3113298825181	14.0616809334513
SNRPD2	2010.47728380979	-0.469828839398717	0.0018397396469225	0.0458392447087627	55.5097373440203	55.7501516368769	49.934111145709	51.0910500086731	63.3765772585217	69.5957888246918	33.551547874342	43.393482601269	54.7911333488231	45.3821174726325
SNX29	633.912703808493	-0.573087063565956	0.0017945758222853	0.0453134704695298	1.52210957078204	1.46574047038432	1.97051557774491	1.94345428857496	1.29909985697909	1.30894191526143	1.10446788069012	1.21790746274714	1.17888904115897	1.20440232288717
SQSTM1	7828.97338362847	-0.326689416673198	0.00144556739600658	0.040115108807687	49.8578856534539	49.6096795803589	51.6647183777232	48.1076868736878	38.1074599206976	38.9173282792023	41.0344945462997	38.4708660941141	28.29561286971	30.1820324208287
SRF	978.225588847126	-0.707862558449677	1.59930021855216e-07	2.17838017268625e-05	5.41870600398429	4.86434800791147	5.6191930581195	4.93608478205287	4.60276245431988	4.29901241712634	3.27766002869821	3.11112991421227	3.21979767687307	3.2150400559351
STAT3	5626.3165619592	-0.383501829910777	8.24561607438013e-05	0.0042921845457243	22.730948049147	23.7118695923355	25.1190322157062	25.6277658294518	23.8714684665306	25.9334389372635	17.7596229696721	19.5519418601462	24.2548271911522	22.6084005774187
STAT5B	1291.07166577499	-0.44982476900534	4.82456631668181e-06	0.000394287682230821	5.28090742842161	5.46728939113303	5.65400549455781	5.63962533912301	4.36006254068111	4.04064502853109	3.85967067882692	4.22249663658055	3.95438118003757	4.1737851533919
STMN1	6057.6865784772	-0.764918512716814	6.67255475116678e-07	7.17519127683033e-05	40.9991296301601	41.867888902886	33.8003855707911	37.5477545231275	38.7667644840264	38.0278440216548	20.7848974315966	24.7526527977702	29.7398194612579	25.275890997147
STRA6	686.198115804554	-0.679894587199103	4.5362965515125e-06	0.00037687292389395	3.08409430019283	2.59549082098838	3.07812293832195	2.86702686400765	0.862555817815305	0.689326984898283	1.89751353929477	1.73650898577018	1.16133659233668	1.06627612395577
STX3	3779.86890431941	-0.728643587176219	0.000651237735642262	0.022222298098273	10.616356844785	11.2311673898586	15.4292772065611	16.0985531961933	10.8671039445685	12.6522171168735	7.80319481313297	8.29786039342828	8.10353458021885	7.88062204962286
SYBU	74.5909844332524	-1.04306345636647	0.00026233647465422	0.0108280042379375	0.331885631393656	0.348734295707807	0.347352710362847	0.431289662628903	0.252985228885486	0.220237137992896	0.207336739226133	0.146803991506434	0.169470836194255	0.191593279494242
SYNJ2	2565.37766735067	-0.484369548183153	3.04597233505494e-07	3.71540431466217e-05	6.9620514151896	7.7019651207024	7.48128411841244	7.53777224173956	7.78952434925287	8.27172023601259	5.2205399404017	5.40033349474752	6.07409042576531	6.56534008257225
TBC1D13	1482.84230689774	-0.754527315397018	0.0016977256417361	0.0436082282291062	6.99742849906483	6.8209192707713	10.5676596992969	10.4982451635071	5.05687291433386	5.29019649581551	5.30183218056893	5.02378078502695	4.55539912162263	4.50060256778564
TBC1D4	981.641273236816	-0.761847939836887	1.93068402263829e-09	5.08984360484239e-07	3.14039271400437	3.45238716591716	3.76670689274604	3.66239520343793	2.76201826134006	2.85128471852909	1.97857784320166	2.16077382008321	1.25136690135491	1.52433347934052
TBC1D9	1429.91048217924	-1.00033357568164	7.31013127646599e-17	7.02847621846098e-14	5.61196287997326	6.0499129504615	6.33698865630872	6.7877299924057	1.92260310549717	2.07611600451844	3.01287706644878	3.18829047904375	1.93350728613721	1.85934074902033
TCP11L2	260.557173075081	-0.616993035103439	0.000231768654041741	0.00983963285795393	2.15031342583402	2.19083340479458	1.90680051927114	2.18019409482575	1.69001492127055	1.90499954477987	1.25106439798693	1.50305232242831	1.40823996804589	1.5265226755491
TERF2IP	559.590510334887	-0.737719783482583	2.75831803742819e-06	0.000242390904955719	5.40212109974089	5.20232528030122	6.30294750157974	6.59069938778959	6.65732094274086	6.75172237041172	3.35874786368581	3.69826081045762	4.27646934100849	3.89311001050097
TGOLN2	5141.89859172921	-0.399125397745182	0.00161606227466811	0.0423309901914268	15.6458007330509	15.9795784357234	18.5686521162807	18.7979940715646	11.8177206859649	12.7258503690652	12.5635782810414	13.62493238344	12.1464411412245	10.9140007992198
THSD7A	87.412782459989	-2.11673996696342	0.000493098832531563	0.0179104453727298	0.0959980140634162	0.106570890666439	0.336453942301714	0.34581996766234	0.705530901160568	0.92955926810154	0.0557062453777555	0.0457595738853403	0.622255939319358	0.475852065220808
THSD7B	569.181041351803	-0.686275482514876	2.21230975981831e-06	0.000199901928180866	2.03770598487188	2.33428580375654	2.06069960072277	2.0364130316842	1.42558539818711	1.29769262899295	1.37389850408979	1.25802992189371	1.66239439014808	1.71677674592342
TMC8	65.6168883571193	-2.35232085591821	0.000241466751596029	0.010172098079477	0.193640186059958	0.192873188212238	0.604440763622478	0.624519569244238	0.389574509867152	0.297206005707472	0.104246331063932	0.0527750217033538	0.0868704181998624	0.0859165841147736
TMEM101	573.877857751464	-0.72923968455017	2.82583744320495e-05	0.00172764506130818	5.67143272515444	5.81229859645002	7.49055903641293	6.71712507894388	6.29943919031042	5.35093332517847	4.03758917698565	3.71100340960802	3.81305329049791	4.14406008685829
TMEM150A	164.3756949506	-0.613468339132092	0.00146365094401862	0.0402750415487953	2.20256366074377	2.5809875651749	2.3317128766392	2.35553690972063	2.90213837251571	2.8125274580873	1.67190990252211	1.41991768001068	1.46916218644065	1.72649209916506
TMEM246	550.137321401716	-0.637699513478238	2.7650689474645e-07	3.50349239893854e-05	2.58987888074745	2.60996899334317	2.91236738062323	2.77581627493245	2.22027505491137	2.09948481098662	1.70759207629327	1.79670894381449	2.3170601034689	1.87200189930692
TMEM268	449.692610787199	-0.389866952678876	0.0018249835903075	0.0456106372837556	2.15153443800025	2.07682522142894	2.18832245468662	2.24005842247588	1.6179076597916	1.58127306227964	1.5678685539559	1.74333191418392	1.19886275457463	1.20150860819637
TMEM33	3273.92271159599	-0.42952475386514	1.80843815115401e-05	0.00119189199921824	8.69750597430746	8.9688105491237	9.09308195642095	10.0059039145891	8.08125200154913	7.10053437124818	6.77416245374209	6.88798545018289	6.01126254370625	5.59551766365714
TMEM41A	640.537049357244	-1.02608755241545	7.19269040876389e-14	4.35588555771254e-11	4.74209540895542	5.57752827949515	5.58839076508535	5.71490910118036	6.85294358486453	7.4255829660173	2.61374572798837	2.69694563101756	3.79499340441563	3.38435362827034
TOP1MT	1180.51041002312	-0.917205165920175	1.23773948288623e-05	0.000887573039066773	11.3134444115712	9.93577325844293	15.3098886511228	14.0135469573112	12.6812933584663	12.6337734860679	6.82497072542767	6.56281391934178	8.41305995719999	7.71438550344512
TPD52L1	125.332680218865	-1.71493187239183	8.57574041627098e-12	3.59411479753716e-09	1.23121724057404	1.27142650484652	1.13210531380307	1.00650426800455	0.732640083922624	0.86741109796431	0.397696003140878	0.309745860640337	0.276172933831073	0.327768677873253
TRPC4AP	3289.22196801944	-0.416606057511914	0.000326253420085391	0.0130381715190604	20.5151087214892	21.4302369336034	24.3503203042602	23.4150880760315	19.7034729615195	18.7524878191553	16.1247119944352	17.5263311416974	15.9721771099308	16.2725143016633
TRUB1	703.12736286498	-0.486491553170293	0.000321154372831548	0.0129611561084732	4.13281263383753	4.58450563818845	4.28433789661682	5.04961456881099	3.78768952001168	3.72932477216286	3.19170857385893	3.25454811393064	3.10287712231136	2.77442075158247
TTLL12	1050.3849553296	-0.715778898494112	0.0007467720791268	0.0244388808344911	6.55536137707842	6.53557091427826	8.51359857797147	6.67345680261101	5.5116359958457	5.03415094432657	4.97294380437476	3.62182761498814	3.18919865372454	4.26464222220544
TXLNA	4387.29578791039	-0.829449055897655	1.36856779606201e-05	0.000955950454129641	17.7749608479089	18.1266211652226	24.8285998939829	24.1999379830779	13.695756197682	14.5675753899191	11.7759533429333	12.1192265949039	10.0304988815019	9.63676665806248
TXNDC15	789.077881547854	-0.527400477264516	4.99603211163103e-06	0.000404258142894105	4.5763536592031	4.55284737243968	5.00661545875413	4.72759536347956	5.22534126385196	5.32277282203557	3.33166978758473	3.21927742437003	4.2829244213337	3.8903094498998
TYRO3	2031.15977110504	-0.365414007867873	0.000656699847004022	0.0223615035360042	9.83887712306858	9.45879223442269	10.8733372759121	10.2917892124507	5.67228410279612	5.16207962953704	7.83215497681555	7.89235481153233	4.95229390939585	4.79589732395084
UBXN1	1039.65423239267	-0.459227516873652	8.63528110773524e-05	0.0044665718261371	16.6148163579836	15.3408521432064	17.568396655987	17.4085118415176	21.7917427841019	19.5253358926073	12.3116257626682	12.0657039641526	14.4251933392592	15.0219908508577
UPRT	223.110401501514	-0.686320062908229	0.000358728647483105	0.0140947589978638	1.93239232621266	1.58826783459632	2.14168717686057	2.05547684847798	1.06427224113987	1.15869616337258	1.13935351128833	1.26671673129234	1.22613459433519	1.25589058718611
UST	382.204869671529	-0.700679676361948	0.00170792115968269	0.0436869661267818	1.53870026405054	1.75263662266356	2.28228544904694	2.34815304561061	1.02708335934626	1.08853221121867	1.17080761389254	1.2665062186852	1.17792825965131	0.997223284599574
WDR77	2442.99049605214	-0.471648613457188	1.72944153268241e-05	0.00115378456537526	19.2495157159045	20.1606934642112	22.3008539088379	22.1707669101888	17.2320721745622	16.9517910252365	14.8122480834395	15.464311691138	14.0333628759209	12.5858677222754
XIRP2	142.711292705354	-0.979522662502844	0.000594600017666856	0.0207665326683008	0.284771977794497	0.329206737982963	0.205131997116023	0.217833634407113	0.109866138001423	0.12732044090195	0.120287184218045	0.143284123128559	0.124133202810098	0.095249232649597
YPEL5	1351.81911648051	-0.5089764079082	6.14448552344597e-06	0.000485176888312678	11.1716772609086	10.4026274800392	11.9154181042803	11.9222503973119	8.0421503544073	8.53975435589324	7.75226068331127	8.23281496456458	8.22992343532882	7.22481321479503
ZBTB18	617.113526380047	-0.585365090426118	1.44344438411783e-05	0.00099935336395231	2.92970846618506	3.02035568092095	3.13679678309554	3.09016155851626	3.06644047992695	2.40816018120569	2.17527528864513	1.88334401754792	2.21955665326683	2.03497282877454
ZCCHC24	867.146061264359	-0.829755395463605	0.000249170065005441	0.0103630654262441	3.2899147561391	3.35525766369142	5.02208679214947	4.66394912541453	1.6472745559124	1.37976088112323	2.33181643536992	2.25925716087113	1.63895602696236	1.66310531745869
ZNF274	789.544450003657	-0.386294250765866	0.000212579907331543	0.00926564956089085	5.65291387203974	5.91410566472466	5.84334495734104	6.02421391912819	7.59652383422789	7.53377464045526	4.36636783920498	4.61034512434961	5.77164026228223	5.15837829061322
ZNF394	437.177384712573	-0.410493928424991	0.00189368357488855	0.0466148464330623	3.51955136399911	3.32784131849212	3.79811687485238	3.62423303350653	4.04420651469391	4.34842069358513	2.71102125388684	2.66649128990161	3.61444818070539	3.09208067122109
ZNF395	890.612272326858	-0.446890099199413	0.000888059366453354	0.0277539777144934	3.54535290417189	3.9413203881101	4.38086216369616	4.26242409252456	2.37823593613426	2.21042870196199	2.92016420354289	2.99987016929513	2.52447693740673	2.41935876451842
ZNF514	1131.04688443925	-0.41934208188474	3.31602310139929e-05	0.00198536254917112	3.73728092447345	3.99113750296039	3.79898369309409	3.98129987446069	3.29905463008699	3.34939824620869	2.80518842684844	3.00128724849364	2.97328351283972	2.46045967998258
ZNF585B	163.763930274837	-0.585681793362865	0.00157153263940223	0.0416316061442941	0.536819473534638	0.625686870796777	0.590159908371405	0.598711624887184	0.944887169043372	1.06438445431996	0.356069207320979	0.427542394329912	0.764572326772778	0.672515175078105
ZNF618	994.226990215726	-0.547311352478446	1.23809515391388e-05	0.000887573039066773	2.11804068805859	2.25430231355766	2.48633810210232	2.45543245075244	1.14154354812874	1.17537848358609	1.62782432658153	1.5601170186664	1.67584814337122	1.6950782115504
ZNF783	204.222210349644	-0.548276926538213	0.00168471744789289	0.0434814046872519	0.96703064026022	0.919082533292487	1.03883207989411	0.949207146001966	1.21130515386354	1.09406103743867	0.707195129656102	0.61926481339963	0.870722623262883	0.922571690745303
ZXDA	269.115775643281	-0.495897767966377	0.0020293074431682	0.0491393039386433	1.09962853208215	1.14645394522851	1.17374232352883	1.11586820084518	1.23005016835148	1.07982895104889	0.715251625428489	0.896282939689164	0.788135813939823	0.894932499069766
