# Supplementary material for: Integrated analysis of H2A.Z isoforms function reveals a complex interplay in gene regulation
Source: eLife. 2020 Feb 28;9:e53375. doi: 10.7554/eLife.53375 (PMC7048395; doi:10.7554/eLife.53375)
Supplement: Supplementary file 10. [file elife-53375-supp10.xlsx]

## Sheet: 20190507_regulatedGenes_OnlyZ12
Table S10- Genes regulated upon the combined depletion of H2A.Z.1 and H2A.Z.2 in U2OS cells
Gene name	baseMean	log2FoldChange	pvalue	padj	si.Ctrl.3.n1 (RPKM)	si.Ctrl.3.n2 (RPKM)	si.Ctrl.4.n1 (RPKM)	si.Ctrl.4.n2 (RPKM)	si.H2AZ1.n1 (RPKM)	si.H2AZ1.n2 (RPKM)	si.H2AZ2.n1 (RPKM)	si.H2AZ2.n2 (RPKM)	si.H2AZ.1_2.n1 (RPKM)	si.H2AZ.1_2.n2 (RPKM)
AATF	1823.58864619314	-0.357571884692595	0.00215863059865449	0.01359747368302	7.23718256266711	7.72260636068179	8.32348892728391	8.42640148995774	7.07589787018552	7.28056807769927	7.15559631941639	7.63327136980845	6.56854340092832	5.71368316597187
ABCC1	1537.5913444527	-0.338948339311788	0.000671665777175142	0.00521785927440218	2.1009124828743	2.29051038987932	2.14317581865986	2.14591592238172	1.7436999019316	1.92273702233012	1.7908394012361	1.96387746766146	1.72609047205083	1.68184243504672
ABCE1	2561.82619160085	-0.365300703030332	0.0100724710178168	0.0458301873402882	10.3512620950019	12.588359993487	9.99964157587377	12.6517753583547	9.35736351529008	9.84310798352084	11.2890615035779	13.4754731117152	9.12257283127833	8.42351617795256
ABCF1	2849.52767947491	-0.479356794934076	0.00227929901565819	0.0141730611599473	1.94077226967418	2.00423531858273	2.48372037284398	2.53133138742325	1.6882507150566	1.83701394620893	2.06072052869203	2.18118733213641	1.67855043855474	1.50920247076231
ACAA2	1030.74467427807	-0.35931668227008	0.0110525271381686	0.049242060239121	8.83985762817471	9.73903316034035	10.1912021448244	10.9583276458866	9.44212809778075	9.97224435367184	8.21974030780176	9.71215275876009	8.47343205259889	6.88365485205292
ACSL5	81.7659508991401	-3.34659751080037	9.50802076317627e-05	0.00102052360271344	0.1148059819181	0.200365287693215	0.886859937329843	0.979564422718769	0.155828245244429	0.166630433783406	0.100046834314662	0.121083860873726	0.0714617895941316	0.0332838025617783
ACSS2	595.640225753113	-0.462438537152806	0.00193060585260524	0.0124006348280315	3.44360184947905	3.11138505845104	3.64221451699769	3.95901440106863	3.52647176284568	3.75139223502454	3.11109872230411	3.30337098473368	2.4719109730951	2.63435095001961
ADAM12	3566.01253151419	-1.12422173549196	0.000929880644106782	0.00684328436331089	10.5175004577814	11.3250315104228	5.72492531330438	5.83425892010978	4.83736068137631	5.40106025921889	7.37834219587644	8.24296978354874	3.82079489741353	3.82521279472002
ADAM20P1	112.9232762385	0.684332481271725	0.00245498146801195	0.0150451608346306	0.511510931039921	0.594353520848754	0.501044178071277	0.524323575621934	0.46760792011688	0.675177861563929	0.532992589575788	0.592305874376774	0.743569806745263	0.957731551975282
ADAMTS20	24.5183344773438	-2.12280433471348	8.87695092075399e-05	0.000966676328404541	0.113672282294156	0.120241275791626	0.082739119517653	0.0789436199985252	0.0508826923247115	0.118147292991616	0.0287481515744989	0.0579884612619751	0.0233344619082879	0.0217363608566716
ADHFE1	44.0878638230403	1.06399496070096	0.000941941958218873	0.00692035185960274	0.278043691538888	0.22468117206862	0.302102047617408	0.370599032032018	0.482335702008297	0.413871558835177	0.411143389531461	0.366817007126062	0.64417429543375	0.580877001753632
ADM	24.5767643678677	-1.62437753494842	0.000573677303315019	0.00461088436864606	0.305217607436557	0.408046309501082	0.349765227816525	0.314089801571231	0.305776179347559	0.179368005487172	0.339238050723709	0.285118223340397	0.11568719900333	0.104498580118489
AFF3	165.481647121048	1.19653883354296	0.000655323258372856	0.00511867039630871	0.148584119520294	0.185169273654424	0.326655327947039	0.315471498366379	0.277075219892968	0.349461274085646	0.242662061571625	0.314664692904776	0.562017562000414	0.543759735958132
AGAP7P	82.0640245141701	0.641009105975931	0.00640301940010389	0.0322667112526056	0.437800411687738	0.513819219444718	0.543636659965566	0.486279715898541	0.533247233248572	0.829400041990954	0.454407983052912	0.671751327197088	0.722515210454004	0.811090454118683
AGBL3	37.7020611868073	1.18109921217117	0.000548853692693772	0.00445092112092958	0.1452100751728	0.120512544882546	0.143520155167884	0.10601530947458	0.24219758287184	0.232079251368026	0.0848175143332228	0.171087074294266	0.312384907583291	0.270415586961021
AGER	194.728308907609	0.580695852360272	0.00237402720543538	0.0146482166959431	0.207594758039016	0.194463546741283	0.248717269284874	0.248260507733655	0.275999721708037	0.266870051832131	0.205630883314538	0.26395224169504	0.358590623860135	0.309333805717638
AGT	12.8385684545633	-2.74009402553703	0.00609811917622747	0.0310121574206253	0.23610154595601	0.117694278270134	0.0569698189088334	0.0603960410819293	0.0150521400979139	0.0344905099560521	0.0985724599142356	0.111112248801772	0.0194141549129568	0.0160751492248837
AIFM2	623.835674028125	-0.397422601962141	0.00845480975383105	0.0401568410198543	3.47706581623439	3.9177153938752	3.71422184275535	3.26532589864245	3.06969176871906	3.15359998108937	3.41612717078775	3.4128212690425	2.59835066964263	2.82459662060276
AK9	149.750107632311	0.650728605665763	0.0102920503449728	0.046603054842691	0.293373803622149	0.294775475580403	0.230076062978601	0.204763996303585	0.312629035565561	0.368714151350515	0.309932320770528	0.339378310760969	0.43089938661653	0.36824632621542
ALDH2	771.538468627619	-0.490749176886161	0.00746498784934199	0.0363394762614994	5.93663062852813	6.31865157482577	8.1148129625542	8.25772201309314	5.92861418644902	5.98771326084423	6.11685179405659	7.08615669834061	5.01661762950804	5.08137027692672
ALDH6A1	1242.40697974468	1.03351326587305	0.0110137785809745	0.0490948822660093	4.3195906374749	4.70164562156975	1.92689445674307	2.07676653085269	3.82367213765196	4.38722132979746	5.42504423493326	6.48783664264131	6.65156370929888	6.66307804863725
ALDH7A1	1659.57295447825	0.489631594993561	0.00918727265105289	0.0426960839258506	5.48893479879799	5.93949802488299	4.36752196775709	4.60032827343094	5.64982200553643	6.35925625106396	6.07091325241646	7.18519872762061	7.60216772056729	6.64812938041096
ANK2	950.885625619517	-0.677975994131241	6.5345898901881e-08	1.75728314042241e-06	1.17639412251286	1.37669263751039	1.19625242222507	1.41866020663543	0.973640545398317	1.26679194289215	1.30731207355713	1.47772174702832	0.81877169492005	0.782363043923055
ANKMY2	1103.43497644753	0.829646165061005	0.000694588477008608	0.00535718509376837	4.62910242592092	4.67391694362596	6.84995489909352	7.58022083613425	8.95111594819945	8.69259125222251	4.39228078916473	5.39983785096613	11.2898439803018	9.60011686696171
ANKRA2	278.662275199857	0.791539632054887	0.000666294199146684	0.00519020830377907	1.54552864912142	1.34673382460733	1.91993646302648	2.22947671651007	2.61893541488872	2.41663297201808	2.18814716293694	2.09000219038238	3.15725859303281	2.89142056249145
ANKRD10	1792.46645995996	0.418277461557794	3.02870981631413e-05	0.000377687586963294	8.61951992583075	8.77810447317251	9.08997381956317	9.42935386724293	10.5059755382475	9.86549385107525	7.89573366147269	8.21720853109534	12.6158343186874	11.2200074827706
ANKRD18A	357.627749971388	0.381904420251997	0.0058590792128841	0.0301173847425068	1.20798786839338	1.31517411811406	1.35143871551685	1.42984195668224	1.33056072132573	1.49383101871019	1.45786427929975	1.34870909577757	1.6468694238284	1.78484391237536
ANKRD18CP	26.2508326020891	1.19304506116332	0.00211644673461006	0.0133758810914083	0.0813542850142484	0.077582146696435	0.0959702459577604	0.0676805431797701	0.148831875049781	0.14096060252651	0.087910540780655	0.0616786360695553	0.191962409292399	0.174841852640852
ANKRD20A11P	21.1525470743341	1.83319444153029	2.01814317070598e-05	0.000268419289825167	0.165673527986177	0.223619128713254	0.165370724332586	0.172128717083498	0.250241829127819	0.360425829040745	0.23410959229631	0.319447715305096	0.645520650855814	0.629944910250128
ANKRD33B	1195.33590812449	-0.359475235560374	0.00422192880885589	0.0233203550791963	2.35327442526646	2.59381896474681	2.34317637683238	2.23401545620939	2.24625088149707	2.3185664193699	2.0452544431021	2.23924575727288	1.87234023459263	1.81587696599342
ANKRD54	687.565930660649	-0.339055608086185	0.00554419858790669	0.0288352023409772	5.62815202398631	6.4910272864417	6.17173942892685	5.99271445190559	4.90121776485994	5.22257635081084	5.50352726168132	5.60823062746783	4.66050708791838	4.86821994134657
ANXA3	779.190167077872	0.326839588778873	0.0100733599618406	0.0458301873402882	7.00135667646672	7.14254423479664	7.95593184257347	8.5362226568479	9.07463571069907	9.88179969352479	6.6673485865352	7.53695397434618	9.50821635588668	9.56302480526546
ANXA4	1212.36445065252	0.397194590899689	0.00113857057480482	0.00806812237420454	4.63652758368278	4.5984084749832	5.23171247373087	5.53214325611421	5.5776872936975	5.79078795272499	5.37059657886411	6.14756492815389	6.57301120369941	6.50029232711679
AP4B1	652.644122563495	-0.357186799829433	0.00460818674759324	0.0250196148722409	3.16051184403179	3.3451381937092	3.6719050627317	3.79055900493162	2.91794324041261	3.2790471828066	2.6830749249895	3.10130606715933	2.75416489576325	2.65658128639109
APOBEC3C	1132.10406020338	0.377891599044	0.00246891235997485	0.0151196685651489	13.7780803142647	16.2527485049277	16.7696406885787	17.2950299297892	14.7652672096276	18.7247703428857	17.7391318844396	20.8205718656436	20.3861347613311	20.900187162472
APOBEC3D	114.801368195939	0.769934946028537	0.000145946140956476	0.00147179488626531	0.576117613899994	0.599414811924407	0.705761144516623	0.679620748980099	0.823579980299442	0.818953251181818	0.646490412286093	0.700322348021079	1.08229065918272	1.08699606736317
APOD	19.7864257843942	2.66392676343312	4.17682023496373e-05	0.000499127113474386	0.0981635389783312	0.0179423017728629	0.173699129274838	0.138109177128943	0.309781035501846	0.331255403938976	0.212148869479134	0.200592024385501	0.562334719531875	0.808708038173616
ARF1	4240.69156027521	-0.400421955837217	0.00572686525326429	0.0296072070240993	31.6991080074903	32.9304092729327	40.7056296618405	39.5483608629335	29.3480026053577	28.5130252671664	29.0116957179427	30.5456570127267	27.4339144252441	27.0149391770034
ARF5	1232.1195712915	-0.338031918050688	0.00738776529512864	0.0360657269407643	19.7736611437202	19.960319600911	23.0127573598111	20.5189157294134	18.1875448281637	14.7671747765705	17.5530929348007	17.6481936782961	16.1880514139539	16.5432646105236
ARHGAP17	806.879688921496	-0.41905653527785	0.0022581714343709	0.0140736020914485	4.42956325627036	4.58768651942092	3.96214528518292	4.31409145201009	3.31974113391176	3.62183183921065	3.89413185612739	4.64663888235032	3.05467075189005	3.37371983333523
ARHGAP26	655.067212945149	-0.610922046666789	1.7717998485507e-06	3.23900091462715e-05	1.31279211346865	1.38813204524548	1.4039126615651	1.54319934652362	0.957203564638272	1.32487505878037	1.17497587214217	1.28698979034638	0.867453330472024	0.969423422297087
ARHGAP5-AS1	58.0652757600226	-1.15894627642611	0.00352262514780308	0.0201239330252154	0.616970486494371	0.854675452131219	0.995956365748391	1.38885434798988	0.54653016411723	0.584416247386483	0.526335383148612	0.813955771081836	0.430779031417552	0.421542867105614
ARHGEF10	1075.65344943754	0.384092684253249	0.00642324402659003	0.0323591396519857	1.53033334359804	1.61592658260324	1.31370778191007	1.4509230722736	1.49700278960441	1.60547565324428	1.80243814047746	1.89355580699653	1.89261965635804	1.9400303730104
ARL10	432.803367315048	-0.549412141216257	3.51698903934665e-05	0.000429232525938443	2.41529804373297	2.40800422473627	2.55183207612077	2.40273517101892	1.91051826310237	2.07519182741326	2.18813516881759	2.37969201011467	1.71143651290157	1.60792976504901
ARL13B	490.48863765477	0.750917966373529	0.00651650873489112	0.0327234617476239	2.13679881486558	1.89244618018489	1.304080482791	1.33150809248062	2.60936934457721	2.57795183506228	2.35998857844253	2.61527012055742	3.00379227694575	2.59487450132585
ARMC5	152.007354177223	-0.659822056294166	0.0101031092027159	0.0459290551691718	0.571777314667599	0.470291775850555	0.729629322266185	0.590961611810858	0.547487278137128	0.371053337084697	0.582210691071552	0.365498499627083	0.338154241481509	0.407640798385491
ARNT2	613.132632023918	0.509121671098753	1.67375978918032e-05	0.000227007799662784	1.3552683018484	1.44069186757458	1.35432612498409	1.5039958819519	1.57168396667391	1.72865299890256	1.2771431494347	1.47702369648419	2.11129378735014	1.8811895581486
ARSK	133.307038000994	0.86599837892616	5.67339360600565e-06	8.91963364369635e-05	0.472549592346361	0.539449114886941	0.547667209791319	0.601858736923347	0.54650293291822	0.644779719276477	0.752510115506703	0.912548788963316	1.01982062423482	0.931349452849762
ARTN	24.5675299530425	1.31396798299879	0.00299693733633622	0.0175945921378892	0.0927226329469963	0.146011941382042	0.201934172922394	0.144503120514542	0.320121234674975	0.275072462118638	0.323707090582552	0.108825988538361	0.344075283231004	0.373929139891584
ASL	782.74575491242	-0.606650255421857	0.00563494668429703	0.029205138238766	5.8722583064109	6.19348264832755	8.91971272320803	7.82527380100845	5.5091685570835	4.4856292377896	6.37379392359509	5.97886721975467	4.31078568730153	5.06969828935325
ASXL3	95.0474653333287	0.607959739107802	0.00919565913696305	0.0426960839258506	0.127698270982578	0.140488490418688	0.104730880141226	0.116352832762345	0.158635641224887	0.181358186409383	0.139303523738108	0.21206933899891	0.187739980872154	0.182169044807909
ATG14	1053.09287693472	-0.435778625256311	0.00567528137552862	0.0293835598544995	3.62791681466064	3.84293613788703	4.39005658286883	4.94217124127913	3.40318637052476	3.78817059026988	3.45275863384176	4.19279482216867	3.23652750290841	2.92072209501004
ATG16L2	507.482654777319	0.575668136263125	0.000748628582768926	0.00569222724172621	3.23836747765326	3.17772819257569	3.81294512474392	3.02480439286334	3.46017134552822	3.43902514494072	4.372526354306	4.1497604197084	4.64378585571826	5.18081122789429
ATG9A	1751.07736910125	-0.390979849927714	0.00168291833531984	0.0111313582271501	8.44560871853602	8.92260996536094	8.96578217531809	7.92975051916221	6.74195673302428	7.05152790802592	8.36571210817917	8.61919401484811	6.39655937060941	6.59155142978565
ATP1B3	1610.73837197979	-0.650866195422177	2.31117489458629e-06	4.09857888426943e-05	14.7792530093588	17.4639034472585	15.9255486602007	18.5680035024474	13.7679552998081	14.0098160558904	12.684617993982	14.1712925271987	11.5123925920532	9.55794307492561
ATP6V0D1	1225.23087872218	-0.416159537788556	0.0010165700336879	0.00734597958742342	12.7281225252076	12.662645177532	14.6524403221821	15.1951520882142	11.8547410638454	12.2958378851326	12.6682728363071	13.7449178481828	10.3736843596214	10.1731244965351
ATRN	2290.54143346861	0.422471925814338	7.38504639228808e-06	0.000112596856578798	3.57797776139195	4.03612640409877	3.798534911907	3.91759853361265	4.64022783531746	4.8691569490206	4.31785278718724	4.82489758201483	5.29044179334235	4.90624389181553
ATXN3	543.507748020537	0.39810668942048	0.00590296343822155	0.0302795593201191	1.04187840911394	1.18842407011074	1.17823455980567	1.38869948019907	1.3843886953783	1.5256730932831	1.30360685970194	1.46417067291104	1.62733029507111	1.50487918158983
B4GALT1	1734.04119492275	-1.16818272184268	0.00988567080874957	0.0452156952828194	11.8546090906584	13.0948464684555	4.87311066358637	4.87628343996869	6.06717031638991	6.4608684496137	4.81354745427344	5.72205588971071	4.09788008316565	3.62556442518145
B4GALT3	869.03711700426	-0.58711928153684	0.00185412246602289	0.0120231096060896	5.70700053060255	6.39726640353677	7.98530500203551	7.89687115239221	5.00880374080578	5.41752651355743	5.78226458024442	6.07579259948938	5.0547009931551	4.17961867498764
BAHD1	1666.73523016448	-0.689317578910142	0.000326173823112177	0.00288653791044326	5.64150856072747	5.88690931450311	8.14448328314441	7.60292163382719	5.42127497180503	4.60004042735385	4.71630052824751	4.67223326997916	4.17359330931753	4.2122746155999
BAK1	789.906620054311	-0.814227443961984	0.000955808521952965	0.00699217268677724	5.60820204932576	5.83374347154783	9.06217584503304	8.575301460904	4.77094499475584	5.02310161741351	5.2539615569791	5.65725000100807	3.95747765574506	4.23337185633913
BBS1	594.554698161354	-0.471951708293412	0.000669570127427103	0.0052086433090572	2.95004009330986	3.22471612397257	3.59652551720328	3.65845882560852	2.78149256176121	2.82973653315399	3.1655507126879	3.02225316740821	2.46613151519831	2.33575257289327
BCL2A1	33.5087532449668	-3.20484378599519	0.00193110444598535	0.0124006348280315	0.147037114323322	0.301004468766374	1.38762825083469	1.70461581400187	0.453703107256739	0.453650788003081	0.142998011837406	0.400616803739158	0.141862640636495	0.0440489773033928
BCL2L13	1028.0494800737	-0.510724968354069	0.00359349698628892	0.0204404674652065	3.03820871682798	3.14805544328946	3.81546799503612	4.30851531610708	2.36345629500421	2.97455467108012	3.04117405439733	3.61266975752224	2.47509522079845	2.50148333361817
BCL3	78.1224149986987	-1.0001788143292	0.00161330992290393	0.0107445704323602	1.04140771636078	0.913671289849862	0.81607839303884	0.678172370311809	0.594688736786894	0.459005035500972	0.900266930032161	0.680979790939618	0.394726709045697	0.467973120997364
BCL7B	696.764037082696	-0.605500521957298	0.00574282884179708	0.0296553651650398	5.40523385179413	5.56697925854284	8.18229445565884	7.14944058921536	5.17968559495284	5.49846540549554	5.52158527031451	5.89815024922764	4.62387193938513	3.95266511856176
BDNF	310.533739468388	1.0161381425971	0.00236406797105814	0.0145998890496234	0.326502675415377	0.388235288975751	0.6750908389367	0.686525370072969	0.639103468967811	0.830235528050664	0.624211473417305	0.729266678382237	1.01903088088079	1.05605556602795
BOC	252.520478464048	-0.750479879942924	0.00490091912072324	0.0262686818997218	0.751155943802883	0.666223478795201	1.12724461573801	1.03672647314802	0.604491807484606	0.544555529980371	0.739836210681339	0.681751602594747	0.543541164120764	0.512771562877159
BOLA3-AS1	71.2034936313343	-1.08593254234965	0.000811265681317414	0.00609034052763584	0.39710548584313	0.425819209616583	0.288876714199721	0.30914701009364	0.143882652792756	0.255246236925361	0.257464678114891	0.274094559335351	0.187574406194811	0.14374789765106
BOP1	2270.23307357955	-0.683498756517702	0.00157051876186606	0.0105174568994179	17.5390983245637	17.2256446925739	21.4516993264815	17.4775541855462	16.6428418288053	11.8904746962591	20.6934745019129	14.065244963278	9.15682575143	13.6150089173847
BRCA1	2638.52509213272	0.414169651192523	0.00744521343523296	0.0362740424357934	5.59746846582567	6.35893989631901	4.73014753956724	5.55612731836598	6.65679975772779	7.2320518328952	7.04580197580939	8.02362648152587	7.66143768193906	7.06126586182693
BRMS1L	354.049416567449	0.404315393986068	0.00799666493180569	0.0384915098566244	2.16784146741427	2.31465413931263	1.9433038227791	2.10178222965114	2.01698677312046	2.22808694316097	2.3599406579467	3.11114296644963	2.95742293174042	2.64436204749336
BTF3	6892.17560232912	-0.349159876893298	0.00278820063943921	0.0166304893398554	101.28881770329	105.367280474498	94.8922468988385	108.382199578109	82.4294238146006	86.7116494260755	84.2359676979183	103.153444777111	86.6092859495263	73.2655107048919
BYSL	768.536434028919	-0.366261240829119	0.0103286999560477	0.0467197631073239	6.13152155527968	7.78389345052661	7.61941268453459	7.28557140073619	7.55417746232572	8.28534843185485	5.45110656715668	6.36343757358814	5.78969773321782	5.29142213510788
C16orf96	11.2025671809834	1.70225812934953	0.00403997234030416	0.0225106630012279	0.0242830120502439	0.0295896103376168	0.0429684798775323	0.0318868532133665	0.0227056217238818	0.0468249445147664	0.0262399543029139	0.0617506484876167	0.0927376288778486	0.115181775590322
C19orf71	91.9633282380051	1.26318930033313	0.00102582562425053	0.00740352269093703	1.69445482893669	1.78273212995047	2.07200712454648	0.860558076864544	4.23146839187734	2.39079373930834	2.4339024081357	1.46383350135271	3.48895413875373	4.17858051833712
C1orf56	30.7083277823663	-2.18473102240191	0.000547524345714682	0.00444643589638993	0.612271733861959	0.495851111494607	0.477810274652649	0.339268195990663	0.409557279348945	0.181637522540296	0.458040506666693	0.369569001449373	0.0340802828091579	0.183422694552409
C1QL4	77.9630354316949	-1.60159847976435	0.00797364521890611	0.0383914596362238	0.34915796309726	0.47127866738987	1.5366554931247	1.01271145766898	0.301363525524529	0.336640739111972	0.776359558375365	0.731780427943876	0.267229026269193	0.281614817607453
C1S	87.7145278197588	1.36118910788503	0.000369068309677051	0.00320792606651009	0.360209534267017	0.541142375533853	0.209551618591353	0.305462112404405	0.346038523247416	0.539181181974896	0.778476879151857	0.73674143048919	0.904538410065507	0.894327483496268
C21orf58	973.869052633725	0.708907120603757	0.00647218190177281	0.0325865730442614	4.29607487097632	4.44744451256744	2.98997481974387	2.78713909352246	5.50377820804816	4.08814690044474	6.00975702475534	4.99999274671163	5.71329677426876	6.11273404565416
C21orf62-AS1	15.0351804250056	1.63088983141764	0.00366252180512551	0.0207369933111291	0.0807480858276414	0.0590364421894115	0.0340196921936646	0.0779018486634136	0.169881308293095	0.133462778625283	0.0747904188367578	0.0628588429161441	0.166942350399602	0.22462413176468
C21orf91	715.240997403562	0.848520742420944	0.0098284371702905	0.0450138231168102	2.30200093730568	2.28012210805038	1.20424575790274	1.34433383458255	2.78842211302544	2.55575884958203	2.37996337230071	2.71463196336316	3.38873305729698	3.01998588456732
C4orf32	241.198269508643	-0.672815041000553	0.000405394975261897	0.00347967395349672	1.8718051196235	1.82220331834816	1.48206052738751	1.78047351865093	1.19851699233045	1.33390971798925	1.37958051747906	1.58540793448046	1.0366940320211	1.13521453667788
C5orf42	3358.76255122189	0.422371535451176	3.36375889553333e-05	0.000412877377577463	4.25786212962679	4.92613032682156	4.40354978482387	5.00840925385842	4.65736520648681	5.29058737320622	4.51269808984632	5.4513361890924	6.30119546284607	6.0588111592876
C6orf47	388.201691622498	-0.6124252183308	0.00067139861766709	0.00521785927440218	0.364905266093052	0.411884916787322	0.502207386135616	0.46926193715659	0.34232390644566	0.304502215121208	0.364047374319372	0.340127758783748	0.276014821192224	0.291273131531573
C7orf43	404.013765007929	-0.620805942465604	0.00225878692785236	0.0140736020914485	2.73406194830493	2.61763862719114	3.75000291546728	3.23605579743833	2.40429082240043	2.20367910497298	2.29200251863179	2.1756439076804	1.92997157108095	2.05578265963735
C7orf61	18.5023914531646	-1.79167936692723	0.00151669361444355	0.0102207306159207	0.303827885831837	0.444268547881843	0.488745059961572	0.435236490474078	0.135589198252523	0.213044169863997	0.611856145603104	0.752553079533917	0.133243496135672	0.10343173704457
C8orf76	121.014112483922	-0.569370443768598	0.0110639019368441	0.0492799613485559	1.91142770337371	1.64676103529323	1.62104086802754	1.79089113293432	1.76794227331861	1.85950624168426	1.31743341357804	1.55391556297441	1.2958972515371	1.03690701751329
CA3	43.5860265925204	-0.891444565131933	0.0082260842215906	0.0393095192613495	0.498876523405725	0.497896312474818	0.448383817431336	0.588245712751373	0.433150905341911	0.407188933073392	0.436398463309626	0.431503878841835	0.315150165188969	0.225364227968272
CALCOCO2	1645.82150369158	-0.458380656474881	0.00512171617964507	0.0272060497159261	7.0653895121668	7.24517384557217	8.7418398568762	9.71460747943295	5.88974428805855	6.83661364377816	7.2579493617962	8.57901835705212	6.06322487052583	5.75679858026344
CAMK2G	2436.13887913191	0.324881572490435	0.000689496597830524	0.00532987383586133	7.2144876696762	7.81399628412557	7.89765745176248	7.63386899380964	8.21238826014333	7.98419794543362	9.10801752687623	10.1874372053267	9.881516382647	9.12693072094057
CAP2	869.038356099564	0.336527322247696	0.00618510706201841	0.0313339857764518	4.25999599902248	4.37378429308813	4.47957640487805	5.10930954160237	4.42657234538546	4.39287177957868	4.49935898296337	5.46142214262402	6.03806086229742	5.3792430637803
CARD16	6.88600016468596	2.48064361703812	0.00608223713320558	0.0309540217211896	0.0548770443826753	0	0.0863148707478309	0.102944175564449	0.102624617448574	0.0940617179170857	0.0592995273362684	0.0797428276361005	0.419154507302783	0.273998585732845
CARD8-AS1	34.7432846057871	-1.375268991394	0.00529363321404045	0.0279207468232262	0.254285071678459	0.268540410640199	0.516614068474919	0.500865630148213	0.217953148315387	0.417695361733691	0.228981363835412	0.2463374970888	0.136297982802052	0.158704224135632
CASC17	9.69200588047566	-2.26259233651499	0.010835779465983	0.0484878145598348	0.154659940473256	0.12782367266894	0.0634594297059707	0.0908225238539506	0.0377252473453051	0.0691549778672657	0.0944612903930793	0.17588282254558	0.0162192616537602	0.0302169148378511
CASQ1	12.5259855670202	-2.39132271976586	0.00141273683478358	0.00963734409246566	0.155793257086396	0.186387343238013	0.125306445403835	0.135499351003421	0.0695258197372489	0.0364140869158074	0.0994786418746321	0.123483275481439	0.0256211319178143	0.0318218990784725
CBLL1	688.6861300265	-0.496990231016812	8.64038614642535e-05	0.000944506332952756	2.77311997613786	3.06034732125812	2.7121933409579	3.14205275762985	2.0548159252156	2.62721372742976	2.95004069599931	3.40464701988827	2.17887868924988	1.92707675689096
CCDC102B	16.0173863882349	1.78600366595321	0.00358861562122628	0.0204194605414412	0.0475011986320291	0.0972412518145565	0.0336211058719711	0.032078801676404	0.133246762634496	0.164873853964635	0.0153987809937963	0.067299231202992	0.154674747055746	0.199223911736688
CCDC103	164.221315361768	-0.845817414368253	0.00860516360463975	0.0406016286057467	1.3256715839236	1.43129501246445	2.50032445905855	2.15140165639883	1.2107308953466	1.38713584010021	1.04106544656502	1.10877548109473	1.10612840079944	0.935128691874666
CCDC113	368.59177782706	-0.737569419127319	0.000470739508754365	0.0039248848706623	1.11904290719577	1.2358927311186	1.50645347194384	1.72481734581505	1.0266554257137	1.04930794132913	0.910475588725488	1.17079309941374	0.819272913288438	0.840071546921968
CCDC183	47.8409087565546	0.917252695406355	0.00340896233594584	0.0195983970494792	0.331287642836982	0.425345475594441	0.428933601574667	0.300121865684048	0.555315201234693	0.467430827236567	0.488956164796022	0.255376870206405	0.721114422268055	0.665676051235567
CCDC188	30.6935176896351	-2.21372783345215	0.000667442998645033	0.00519680130888819	0.83237408446476	0.544504924260182	1.80879425034751	1.35600084653456	0.553005639995396	0.281590766908179	0.733765294021925	0.38195932605475	0.317005853365437	0.164052865707343
CCDC36	201.962943180062	0.732759900139644	0.0110875181191898	0.0493212299663882	0.92648239098478	1.30186955595078	0.687747774728194	0.803716182679316	0.969832739894142	1.28979218091717	1.24044508877732	1.39390098822771	1.52068265822767	1.54346582727162
CCDC6	4433.54050530819	-0.350533965323798	0.00210483446952359	0.0133269990878015	12.8684000265855	15.0442781904252	13.125201327049	15.5822283590068	11.1456834460555	11.7026193719062	11.3902795389534	13.8351342215546	11.3546969575088	10.6661733012806
CCNK	1054.17039381314	0.362862761522459	0.00734072890963081	0.0358870798244938	5.52814976056645	6.08399631028703	6.62802817156176	7.27018155675465	7.28343370926655	8.72083147361545	6.9625594172422	7.74698816511391	8.21344405956803	8.04941816060444
CCS	201.728022792227	-0.480244049802328	0.00549190529207081	0.0286796392575163	3.88290539294496	3.69347150060754	3.724628858118	3.55376860335181	3.09047273359184	2.6253427547323	2.55524268180778	2.89925449199043	2.62497434102165	2.67663695950301
CCSAP	984.755144931872	0.602049001956093	0.000628223656257982	0.00495428880639612	2.88358989903029	3.3533990333577	2.45621513320895	2.6056274454819	3.85833291283125	3.65822203048182	3.40270360745927	3.84789897510282	4.421337154432	4.10028369836628
CCT2	4301.56243313996	-0.365166390808317	0.000525869996867103	0.00430516914062139	34.3966524647599	37.0401601152076	32.6703298749352	36.3555160275078	31.0459030318566	34.7745594073712	30.9771514518209	35.884289908381	28.5198302863647	25.6382709962815
CCT4	7312.38644600167	-0.342073715597428	0.000961367557104981	0.00702088402094858	56.1117039020146	60.0389594632603	53.8398284495157	60.9836387679531	50.121050553163	49.4371611228393	50.8427432321876	59.6151981744825	47.9593486164264	42.5284531123985
CD226	26.0295219789473	1.41363567728964	0.00597021151855968	0.0305152036689261	0.137028782020401	0.0939227964947577	0.0505147251597096	0.0722961875335262	0.156155494184411	0.143126029702743	0.180462489923283	0.102670737620415	0.273708806221872	0.198839368979321
CD33	36.7515776176208	-1.46383751700968	0.00323998361504741	0.0187967179071488	0.353099127396435	0.327419146637708	0.599405846208772	0.72700327712285	0.265740391393233	0.309994705135439	0.288492814357688	0.459908090692554	0.15579557855615	0.206400922221612
CD99L2	602.646499579633	0.467763438132992	0.000602012337188246	0.00478699535473329	2.27699437293028	2.26839562627433	2.67297218160452	2.62119785922399	2.86128120656452	2.78436499172051	2.60052310801775	2.67523878503557	3.30422522993854	3.4550453440578
CDCP1	39.6912362006377	-1.56887925945334	0.00724182841308463	0.0354905153870331	0.0663743412191924	0.100290223568436	0.195747582655744	0.201709477941792	0.111712963177624	0.0853264506715545	0.098021951521544	0.0675148306106828	0.0346875321438245	0.0596527318292475
CDH11	1277.3200171016	0.353253778842402	0.00750107903162256	0.0364944909624581	2.50872932608314	2.8864340353135	2.95240788823697	3.23314078673827	3.14503623331002	3.40905288278335	3.33600295304872	3.49671441734541	3.91260213684928	3.42131722229872
CDH6	88.2468434788362	0.77776300739931	0.0107763640068859	0.0482871027625365	0.143978344345041	0.182144402900105	0.106868907755919	0.142024768080096	0.0862209625769666	0.103982589810336	0.152085195415453	0.232725130146939	0.288748652108735	0.198700922818933
CDIPT	345.809666417716	-0.788929436854001	0.000382922564068869	0.00330826613421792	3.05537877748662	3.14865744857669	4.57403150450081	3.78285818530618	2.60182480412314	2.51565745104008	2.47620639071018	2.64011097782511	2.02665035399853	2.15754479229425
CDK14	2966.33680120551	0.564368468026406	0.00133209622184231	0.00918569080101855	6.69138429976017	7.48153094453055	8.0426497017516	10.046668368638	7.90658595524259	8.28352761074539	8.86142153403657	10.5517134285993	12.5971826466893	11.0301490104239
CDK5R2	21.5258620746723	-1.50676437421021	0.00355974973245846	0.0202955339756358	0.230362023334237	0.200502383339943	0.15528482284855	0.160508212976596	0.153855735810955	0.0493563563358442	0.272633955585576	0.227147192170712	0.0727621227908603	0.0575093550592752
CDK8	545.741680136564	-0.385039326371512	0.00710235817940947	0.0350508107280219	2.99493365298567	3.74899979692497	3.13573428107988	3.35071290198292	2.55057734055519	2.89189522933587	2.94031943899614	3.73866810216948	2.48014990750721	2.54233065992609
CDKN1A	7799.33943460779	-0.350695604563558	0.0111693633899343	0.0496339127211355	48.7635848667093	51.7288058970186	62.1206029909899	57.2528268064578	44.7208272277	44.9233699635883	45.0115419685125	42.9040755866236	41.2312575237786	44.3026723518551
CENPC	1241.63493905096	0.432379274138507	0.00721939710139031	0.0354047145520237	5.39884808731527	6.73203305933369	4.86939325252129	5.91819886825159	6.39922252528165	7.52586428815672	6.56765136321973	7.67971766337529	7.65949183205467	7.67755654959824
CENPP	172.299212829807	0.583011053379055	0.00528261492634823	0.0278797465891793	0.595431942360016	0.837389209929866	0.68003652544325	0.678721987274538	0.893642593296717	0.911711725100877	0.995862248192617	1.20691729333041	0.955938260910996	1.11344151764654
CEP104	518.726855958017	-0.662681393862035	0.000241400839852829	0.00224107619234522	1.35478376040801	1.40021078468371	1.70455831039308	1.86560733602051	1.14130556479797	1.26412365434218	1.22035697043403	1.44373660908243	0.955472233554489	1.02591214040529
CEP19	60.0330023794937	0.682238588868666	0.00947893744126293	0.0437395437676322	0.333731513931214	0.377505377446292	0.415973391633052	0.439415483635501	0.485742541034406	0.420928323503616	0.564754838455039	0.521551409452825	0.615116603073193	0.631938790873219
CEP192	6461.93670918261	0.519722196284041	0.00442314559589686	0.0242293063181038	12.8225507422222	14.3138671576955	9.9460681836212	11.6773594920919	16.0630943659545	16.6424909385353	14.2785718037653	16.2423372644123	18.1602899978262	16.5975673894127
CEP295	1613.37372715463	0.47128199602976	0.00931089078298579	0.043126239141463	3.15957789424459	3.63202240748456	2.53564955300501	2.91600255276013	3.66995276975065	4.11714126344413	3.76624243161124	4.21364610548024	4.36553001076035	4.06913106048164
CEP57L1	267.958005481019	0.459938079708671	0.0102982082633621	0.0466186540562736	1.29948134147523	1.46265875193142	1.09571238177021	1.43749191190118	1.39670286520147	1.66478637943106	1.70820834881327	2.12677074743541	1.88493416030898	1.7257410441307
CETN2	700.822082946323	-0.348087643382751	0.00836685806935325	0.0398492486318643	11.5161510120169	12.3338372770288	11.5102478565765	12.8752280378457	9.18347791973836	10.7113216748998	10.6268413451243	13.1943737817868	10.3119362384332	8.48071289274112
CFL1	12459.0612299883	-0.431264330633566	0.00391429008776263	0.0219614818849762	167.964589803704	164.827519055752	209.422605330194	206.333902038	163.407374064203	154.069464677447	159.210912295398	162.881894054152	143.780438450604	131.719337939569
CGREF1	89.8837968687209	-0.716178835495885	0.00416836270913976	0.0230838365432992	0.678376272887689	0.653783427461137	0.721439396886197	0.584225366409423	0.461316293705079	0.422824505151377	0.694172252917152	0.744921555347094	0.427658285688232	0.369502021619861
CHKA	692.936050254205	0.402777387581772	0.00175115928432242	0.0115076782838978	3.72539120828236	4.42508538644743	3.84685714254333	3.88866034580097	3.55735752971397	3.85753440582598	4.79765259442713	5.19467143606785	5.15140345466597	5.26680343695279
CHM	926.916066093562	-0.355585928874298	0.00076684275940607	0.00580629452336219	2.00106012996851	2.20020916463783	2.11777739690272	2.2873201937502	1.84600782960585	1.97434572087009	1.7960180073085	2.22230041435342	1.73749219798769	1.5984196403524
CHMP4B	945.616613036948	-0.621304177216758	0.00485447359688713	0.0260848262316787	9.01642833771598	9.33108631483178	13.844077232155	12.7067989908197	8.71411983898027	8.53897072570251	8.35118807929131	8.38597266245022	7.07666967773144	7.38961043105654
CISD3	443.205448437239	-0.473718677489505	0.00901144268500034	0.0420566624386327	1.7226798030826	1.39985348353831	1.72812292863044	1.52451888524636	1.44969925029521	1.15292511019407	1.3556330868023	1.28697996222144	1.07843322839702	1.20942934164544
CLCA2	10.3083476214715	2.11012473113286	0.00138609987619526	0.00947820942003158	0.0131209840366116	0.0143894968086125	0.0232174137781603	0.0295364788560597	0.036805990076186	0.0210843335051901	0.0531689634739667	0.0500491416414892	0.102856287648615	0.0687881001134837
CLIP4	4449.83791377986	-0.434152967387142	0.00180323214050901	0.0117641386114301	16.5516905201099	18.1931186066346	14.32872001673	15.9630878423503	12.643424440494	13.0698319718935	16.1788685620721	18.0708725323623	12.1317532109697	11.7847099587276
CLSTN2	631.36321760086	0.872522288325914	0.00996294568937314	0.0454602386421105	2.1386310344447	2.35058118965334	1.12238504347587	1.34581480613584	1.19106147827631	1.53711528565468	2.74985261381392	3.12316002244458	3.47662631022167	2.87585144035633
CNIH3	498.119104996907	-0.884127692141856	0.00405464585728888	0.0225851002955112	2.15245036885306	2.03620670047841	3.75006534788076	3.73477333457269	1.85824176389271	1.86686194376758	2.28722048737582	2.22007693215639	1.5690425297457	1.56140668958967
CNN3	8575.60672122629	0.434267210184506	0.000313864035387396	0.00278942985918	54.613979949638	56.7127300792588	54.4888651867018	65.8221819057061	65.116373826413	68.9772090725427	67.1223306583825	79.2747044764002	83.1060009690209	72.2197999585932
CNNM4	448.055484905775	-0.619580426679337	0.00464823355565979	0.0251654837493566	1.5194386535922	1.49526657399596	2.00369183082246	2.28567810873877	1.36536708483169	1.39626781771421	1.61691691745985	1.57723837174116	1.19144668700816	1.16393457558539
CNTN4	177.694107763826	0.756036367057357	0.000300098447625289	0.0026802971538425	0.417469869732521	0.431774723037794	0.42340557902454	0.561564541041275	0.492699902863531	0.448317108445827	0.605152021210215	0.768463491253969	0.856518155946847	0.678703601641609
COASY	1783.39586561697	-0.580275098854102	0.0013397237605537	0.00922348281304278	11.5989511712141	11.7509796976701	16.1967475138834	14.5626594130431	10.9367660850035	9.68960766834179	11.0980947750448	11.0748972149452	8.97903272756425	8.97530212843074
COL11A1	1686.63842677098	1.46378423476018	5.79660816946145e-07	1.22973968869167e-05	1.85122486342715	1.72308630510917	2.99506816315969	3.29908759699125	1.99948109383233	2.00468090650086	3.63528889699792	4.57389252815532	7.23352327543451	6.23908002165548
COL4A3BP	946.86270893652	-0.393403864095196	0.000505324011345583	0.00415875853015445	2.9024466820382	3.31657923141062	3.02793426966581	3.39461442382114	2.72775429425521	2.41131516810585	2.68030063661421	2.97760257771528	2.47943662357909	2.29206791297629
COL4A5	909.309125754987	0.624112193085114	0.000116206746804606	0.00121465738265836	2.18034003037866	2.23234525789177	1.89136532694343	1.83815425229462	2.59517201944911	2.30199154692675	2.229505601328	2.48528343235119	3.29973057632977	2.94377651306225
COL4A6	29.1484326193906	1.3276954661017	0.0101291916337981	0.0460354480389279	0.0482911619701847	0.0823820095912612	0.0261099039433832	0.03850061373744	0.0564427949688137	0.0982931984793113	0.0478343209916128	0.0789443578774456	0.138319162618855	0.102474119162776
COLQ	105.97374358238	0.65032244787421	0.00151530676143223	0.0102194000739605	0.473720732703288	0.433685582959038	0.427625307365071	0.486828694781612	0.560426145463744	0.603688440927749	0.565312764760667	0.606066811646031	0.720350125053145	0.703409560022182
COMMD9	551.477329253521	-0.632055560029322	1.76709688580929e-07	4.2174712341315e-06	3.28724291936315	3.70476523835532	3.69783958271159	3.69993518441835	2.77541587955453	3.16791021195011	3.07753803490821	3.80426999231944	2.34744472826818	2.25766063765495
COPS9	589.69367639064	-0.33192996654826	0.00839861684852486	0.0399562103889954	11.1878146661173	10.6601582626231	11.1800885465507	11.0775010969975	10.2251059690419	9.98471317703681	8.83225187842255	11.5359006137169	9.18106967584383	8.2320367816294
CORO2B	1035.54520417919	-1.41434316339535	0.00658226228642777	0.0330150598744819	2.33843183342517	2.49607389926642	8.00241560603076	7.97101698369643	2.67456896313715	2.46364213028691	4.00804193529535	3.70001245895513	1.92475870910949	1.92007173698263
COX15	1454.23470428036	-0.44221643100898	2.48375747057534e-05	0.000320427089897648	3.46355788219459	3.88152448834003	3.66113995558861	4.03487149951618	3.22085356489256	3.22003928817578	2.95237852607841	3.56615962019266	2.87917382398658	2.61103653657635
CPE	598.419818221617	0.453057938655931	0.00556585861576853	0.028924703995755	3.82246522390603	3.65222057348595	3.06996374597313	3.30632744174285	2.97438928536043	2.82044842653911	3.29875268419936	3.73216308815138	4.90042205500785	4.53343490844476
CPEB2	574.705653599549	-0.472650446797142	0.000997425620434642	0.00724113302135568	1.59050731896973	1.69569992419355	1.38462864061482	1.6746163865989	1.32999984290166	1.36913953005042	1.31403229269728	1.43718297128821	1.13633272862386	1.13390139280597
CPNE5	30.9129717822263	-1.70718098656026	0.00313676264253243	0.018302930135578	0.102518298563322	0.123137159513257	0.267788068765848	0.243140714000174	0.102705915006627	0.122377101710452	0.150344475432961	0.111728398055756	0.0618190712200621	0.0493588157346045
CRACR2A	1416.06883015026	-0.950595555076844	0.000386194680370011	0.0033331840218374	6.16475846198	6.82198666641385	10.906051767588	10.5115163281067	5.71846501959097	6.34945695764669	5.78748710431042	6.2421905431737	4.36527521090564	4.44265214253007
CRCP	1197.26015187943	-0.340778069377691	0.00715431429569177	0.0352427771566654	7.67992001602325	7.96980716826272	7.01719523791286	7.69905507234098	6.55342269292069	6.90302954405259	6.97635372130611	7.84255568757826	6.39591573701675	5.51379268274874
CREB3L2	1293.93942548043	0.572967099976832	0.00850254259410266	0.0403278200212697	1.96463751709287	2.07973609566654	2.95102169840079	2.97128809906601	2.34244909416519	2.33168533878262	2.97292802816585	3.35457967163429	3.86809959258358	3.47810348251842
CSMD2	1531.04511728848	0.759978422464826	0.000323676035109461	0.00286851417602939	1.16642366812408	1.38224038449461	1.85657582260115	1.7714089428593	1.37752168796075	1.32916910747189	2.2851248940003	2.25257734280605	2.55155551845667	2.62746928291997
CSRNP3	83.191391739508	1.24000996775907	0.00105274845379186	0.00755972813621365	0.101343254941915	0.111140935732567	0.0584166714525498	0.0557369179127519	0.114681305270917	0.131760623216828	0.151821237263255	0.156886065583898	0.202775795655641	0.181125809289678
CTBS	468.675782415884	0.467842329624417	0.00374797812941728	0.0211650529661211	1.88690201536629	2.29489040702051	2.48435686267729	2.5968622702465	3.0415904637713	2.75906283835476	1.91817366045296	2.57783283708311	3.1977364874753	3.14784702203107
CTNNAL1	2227.22485316689	-0.553123422789663	1.74956416268919e-05	0.000236356215185936	15.6509161336385	17.7033247002906	14.5974118872563	18.3618120938787	12.1602259215693	14.0728513788548	14.902149529671	18.8046129999879	11.2683726758932	11.1451723884276
CTSO	31.9568645637961	1.4048453425816	0.000835784725821845	0.00623681816655389	0.0496381857303912	0.0414758970405762	0.0641328612605559	0.0877956224878669	0.135926008398686	0.0941980160081691	0.0970600969083916	0.0927387606773743	0.185293866301865	0.134542367259613
CTTN	5229.00350730345	-0.38102952903962	0.000867573697656848	0.00644547618700185	27.5156723020932	28.2833782969413	32.6285864382636	30.6942068764025	24.6396514270162	23.7137446068823	27.8379923123595	27.9519269628169	22.5016426234664	22.9086701731031
CUTA	2113.17225748723	-0.328333000742542	0.00259564016551389	0.0157220587254814	15.1145446572651	15.9628124663455	17.6390089513604	16.4719095022556	15.9601394215185	15.2899911328844	15.4953605042828	15.1175674491499	13.1796042810261	12.6017639791033
CXCL14	12.8813574905561	3.12101005125532	0.0025806487253046	0.015653324283669	0.0210830205991221	0.0924851540952941	0.0165805048218084	0	0.206991720799088	0.0813087987367408	0.136692473555676	0.160839626243214	0.245787989957312	0.29474637524551
CXorf56	279.331773478533	-0.703713475677102	6.45899625622434e-06	9.97227238696847e-05	2.10861979278875	2.40830969583388	2.16475425325191	2.41824457660094	2.05424283052681	2.02203697924349	1.7119925467061	2.03719490117117	1.48457241810349	1.28046194812267
CYGB	39.3749298695458	2.42285380870939	6.3712229902118e-06	9.84560214602514e-05	0.083219205193426	0.168488650997244	0.196340428520112	0.0648462756879662	0.260375616430581	0.296255327622511	0.415041936480992	0.341852274245158	0.509536416662866	0.843804324225472
CYP2G1P	11.437381489153	2.3091588462464	0.000623934577044003	0.00492272349491467	0.0496974906117896	0.032297572287272	0.0390840334688505	0.0124303759582402	0.147152503036077	0.0567891534696543	0.137239872505045	0.0541622431435163	0.159828518662144	0.1736961165948
DDB2	2237.44668015326	0.367864201441356	0.000685788631455187	0.00530359668898557	16.7467634922611	19.5177873295092	19.5341808932996	20.4199799262173	20.6680870523676	22.232642441498	20.9908133144639	23.1248159021386	25.12833181303	23.6461965628509
DDI2	278.358230273359	-0.606843469549608	0.00682628351942205	0.0339516225753252	1.74354744768369	1.62652321481979	2.33753874872069	2.39335989305951	1.95924945961055	1.94874469954079	1.44798529921777	1.47165685950288	1.36022716819994	1.27869414617937
DDX12P	1796.38125457129	0.497091263021827	0.00465296218483338	0.0251752210907358	7.41343150438491	7.74373954924001	6.76192773058321	5.87682990200046	9.50229397861962	9.00582596621726	8.19868681171543	8.06398069482415	9.38129313678787	10.1374850497909
DDX19B	371.23806774392	-0.345959779240446	0.00881118262316995	0.041335343215002	2.83116477700533	3.02259955154375	2.87167473334448	3.05326883944096	2.25127548772439	2.58119256294427	2.69451040360178	3.020962157939	2.421519829707	2.17361287297936
DERA	1549.57908763168	0.418452057032876	1.08711915233014e-05	0.000157115689769901	12.6358349245306	13.7787727439516	13.0109859144316	13.8588425160443	15.4694948915379	16.4216430134524	15.1491227085931	16.9122204683957	18.4183651696831	16.9238173025876
DGKB	24.8225160120922	1.74993846689644	0.00046834387398768	0.00391060307609538	0.0294152211735652	0.0241942732736695	0.0195186969053866	0.0538006844875144	0.0515708432948946	0.0850820789751205	0.0218527118770355	0.022039767198018	0.099773620316389	0.112905436852365
DGKG	71.0890382842318	-0.805828473044186	0.00632840440718771	0.0319563036535744	0.23658986352779	0.290039380089074	0.259361161085433	0.199046697544333	0.177647422499957	0.196618496190695	0.234997288096123	0.281285196552987	0.149870226780661	0.128867173517371
DHCR7	2111.47000432655	-0.586954106160064	3.7772076366886e-06	6.28948992527684e-05	15.4264554019676	16.3643891025042	15.5280938300136	14.0779115142332	11.0408492513477	13.2163596238231	16.1636641585445	16.6365680922621	10.1587291334253	10.1624379021797
DHRS9	7.99319230125273	-3.3499747553668	0.00972196993950404	0.0445776901891451	0.0606544176758061	0.0354764671974366	0.093016922172914	0.157019138826825	0.00850715879549639	0.0233919889045771	0.0852052409407391	0.145427755212119	0	0.0181706848631231
DHX37	1133.66912308762	-0.641985213104048	0.00488110393404768	0.0261869778341166	3.95768276093504	4.19662987148793	6.04884031098651	5.3358515482812	5.73037057212105	4.69606898677214	3.48319681686832	3.0215890818957	2.72638268592614	3.47748818116784
DIAPH3	1392.38252819793	0.381135703826396	0.00795187233356605	0.0383188374032526	4.20341491710148	4.8278975130605	3.72611011835189	4.22367765803018	5.11174897951352	5.03922467518649	5.15186965726209	6.01096497372953	5.56099617808913	5.41872748248765
DISP1	197.454230585434	-0.556041427173875	0.00159876682124923	0.0106650656274638	0.670189433713251	0.76998127287239	0.807203559226542	0.852580149713337	0.525284229460831	0.644353332059549	0.635956520421494	0.730398308126679	0.526384871766684	0.51880552685248
DLAT	1284.31353852378	-0.363520705052627	0.00614283346739062	0.0311653578653353	5.54815420904709	6.00873071612874	5.00184348387548	5.44390403028185	4.94909933207415	4.87656764918249	4.85069042040913	5.58066766416265	4.47101525194688	4.02383252102596
DMBT1P1	7.8115417672199	3.16115383579123	0.000160327205037784	0.00158976496905324	0.00740881639363574	0.0108334496411087	0.0174797413910916	0.0041694728868743	0.020782650287475	0.00952428295233114	0.0200147126729412	0.0444092771059181	0.102753767458086	0.0721341721563307
DNAJA4	182.951405656633	-0.625951116880897	0.00957606965219152	0.0440340328882149	1.12668278983062	1.28671631515827	0.853728816483291	0.967296689280617	1.02658095230067	1.02021537373681	0.897558958839469	0.945574463705712	0.7091501789439	0.652883700073033
DNAJB14	851.901673738706	0.392837436446878	0.00594555842356454	0.0304300088840756	2.10078201576788	2.28945246186639	1.82373097338816	2.2016214799761	3.03259558697038	2.50329426604705	2.15871036995794	2.64799660721833	2.88001296775489	2.60475891020875
DNAJC11	970.483784522378	-0.519852451948384	0.00162384948507206	0.0108030311852413	4.63169142689287	5.38116491858937	6.39762781434788	6.23210846506992	4.16349600048158	4.54142713710793	4.91850532445426	5.0661516805628	3.96088850188913	3.86621739614666
DNAJC15	416.152780166434	1.02244427079863	0.000809847686570642	0.00608448366220741	2.18273312242839	2.62199335741977	1.37287595301309	1.4954199013479	2.46594830053663	2.09966694643699	2.02400223887299	2.3026172366961	4.0238959852442	3.7333491738027
DNMBP	3151.01825954495	-0.81088465154678	0.0044385518111284	0.0242904695294364	5.50517731490788	6.14426457812198	10.0143284232347	10.3030416663216	4.70260664669779	5.67911933611313	6.89455540178646	7.24180251369805	4.56819198537625	4.44102574083683
DOCK3	716.202635352771	1.01906079057118	3.57187954889678e-08	1.02985198268863e-06	1.13237052138125	1.21347752435723	0.915450293922312	0.934062889338544	1.24614183536827	1.44144882307981	1.28523625860992	1.31177179167918	2.16212113329644	2.06623413221437
DOCK9	1021.23884794302	-0.890573038756454	0.0104214297812488	0.0470277965758874	1.58523075559018	1.859426263261	3.43922980829626	3.51225007272253	1.59503677200114	1.75433812251372	1.41134889293881	1.92670047829056	1.42761953169795	1.34210615822615
DOK1	431.45870953945	-0.858746383905735	0.00921662338430804	0.0427587624827077	2.35756649690345	2.21992402614991	4.4375713650502	4.09987104706505	2.42728696269529	2.06489372908789	2.48037188370141	1.99337699569338	1.72469664392653	1.85493766025911
DPCD	243.754698833477	-0.542349223827647	0.00482326174405773	0.0259576980300307	1.72446116163194	2.10414951589233	2.17859821770098	1.88849792457324	1.68325932409243	1.43795863222489	1.81936597441703	2.11430736291373	1.49655399871878	1.18680530277427
DPH6-AS1	8.49266188385559	2.79030849588254	0.00763506651909014	0.0370833756540545	0.0657137435103758	0.0549080595892621	0.0110742505123317	0	0.131668009522713	0.0603408786231812	0.020288441309362	0.0306931601293996	0.203789477163495	0.253110135662759
DPP10	180.554639777218	0.479746204699979	0.00716694389202498	0.0352783626011336	0.333004055105581	0.411372773980711	0.388315651781201	0.389889164916255	0.426795174055798	0.516657841892398	0.401201476597789	0.500580234767405	0.565480248092694	0.484468831325728
DPY19L1P1	210.534077476845	0.615142502983898	0.00834907338283675	0.0397865992819375	1.86722439213911	1.84510287931455	1.28203236875349	1.47771733971736	2.35291633429568	2.25973257570455	1.72608103399531	2.00317674431054	2.50698934667682	2.4254279859432
DRC3	23.3506514854096	1.17076975814234	0.00509546220727695	0.0271130024604291	0.101874090384028	0.117603254079669	0.107526433145451	0.114663729039381	0.14288473902691	0.220568545030629	0.168022971114443	0.0934958443127056	0.297453481512464	0.192752601378651
DTD1	639.507110796343	-0.580835190786226	0.00092875457887821	0.00683792574269202	3.64081003156464	3.2579947524227	4.22804437154681	4.47577967239004	2.73975456695413	3.251045099455	3.53372969503864	3.48319429514185	2.72916619466947	2.44918547152709
DUBR	476.799896835058	0.514858574271835	0.00203003468320051	0.0129296204581607	1.54062220896548	2.00020458328866	1.60143760005944	2.04507555311163	2.37883812112452	1.96275920055236	1.38482764311997	1.70161737875998	2.64536804080519	2.43703106829021
DUS2	378.623880258508	-0.59622929635115	0.0020485045645679	0.0130279431671113	2.77908367501127	2.78178990110274	3.22208771917204	3.90661855615572	2.43405729758834	2.65262135856755	2.97726986022249	2.93776006810432	2.22960783533691	1.92951571805881
DUSP14	1113.97405440063	-0.345609843567428	0.003734808167409	0.0211045523014654	6.08688801128402	6.73585895402576	7.24010337830342	7.37885828388712	5.1906925829696	5.77411390840389	6.19489998076388	7.01952368623823	5.30049342817162	5.41263492694299
DXO	417.072904422708	0.416779303570397	0.0080102910985601	0.0385463013827098	0.717988086065043	0.677951941306486	0.689243243050211	0.621636065609727	0.862288825760116	0.870682193302315	0.651776810418237	0.736555410296026	0.955295809951741	0.842519802205317
DYNLL2	1609.29255490303	-0.399881556865209	0.00614456659961337	0.0311653578653353	21.0079325393361	21.0074646401178	19.3012981209318	17.8314192313253	14.6302450278896	17.4382205433203	18.2119420025513	19.9266166458222	15.4805392903566	14.3691555301398
EBNA1BP2	1529.31694844132	-0.344501697169959	0.00165708855245417	0.0109774131400819	15.9935725785783	16.4964276129449	18.2792239904507	18.3721373027392	18.8433360081298	19.7895371370643	16.3426174831743	16.6205518280732	13.4224564264953	13.6099536243846
EBP	814.3701065561	-0.823946271182927	0.000848152073818758	0.00632031449978384	16.1425782534905	17.2081716380942	11.7762354793368	11.4653297002895	9.37910948455458	9.98306198214905	10.9426506062095	11.6109899128172	8.72957951086965	7.19827676077651
ECH1	455.786458939482	-1.17692614510358	0.00112017594652393	0.00796279806906564	5.35741309721011	4.78376144021681	10.4641233170427	10.0829540813187	4.83489517976444	4.71373579740784	5.23159868010375	5.06101777440092	3.24378812148184	3.46973759342358
EFCAB5	18.5680121322906	1.95246454393799	0.000164836595458025	0.00162790348066132	0.024060829576839	0.012793690489563	0.0361245231257289	0.0295434680843739	0.0521541576132798	0.0702977423303665	0.0425452358929403	0.0429094155334814	0.110794520923036	0.0884627710302637
EFNB3	218.90429264577	-0.810370197030104	0.00216982002325054	0.0136479455635202	1.21900117000157	1.00145801787209	1.65141879533459	1.60475226845413	0.791427404738156	1.04101980817462	1.19622074373709	1.32382011992717	0.732466693342274	0.819408134642998
EFTUD2	5054.11791242831	-0.388026955905682	0.000176835508819562	0.00172166650626365	18.9150981051631	20.3059177775125	21.3379027932357	22.4462992374792	17.1150456338764	18.8915979535016	18.2713271980997	20.5613935068355	16.5644072572662	14.913128462015
EHD3	473.030826870367	-0.700109423786839	0.00670152071072224	0.0334959080549887	1.87430536021606	1.86345457250314	2.88942676001859	2.98062657798659	1.46875900586761	1.68389980957787	1.75684085237825	1.87246612010442	1.5626091779915	1.3665276111693
EIF2B1	1141.68104912799	-0.52809621384212	0.000617531208408873	0.0048842161898545	10.5808615132319	11.3517201339528	12.0881899386517	12.9357338899114	9.95247503274067	10.4469873356339	10.3839497451471	12.3476011759351	9.1568920723997	6.99707404443118
EIF2B5	1477.08102301532	-0.38857694128763	0.000486950634194984	0.00403654592282036	8.65523470813213	9.41679853364008	9.68531480314739	10.436535933808	7.65681279241612	8.88159432967408	8.53070149982412	9.14601803939613	7.60513231618541	6.86569734334389
EIF3B	13542.3001387913	-0.455854442275564	3.14795814088868e-09	1.13883184616908e-07	80.1828604590201	84.264468305	84.8147121308868	83.8213777778841	73.5793358912126	74.1798916850631	75.9752113821797	79.1269236445905	60.9505744664885	59.6647972606177
EIF4E2	1466.11152023583	-0.414978400677216	0.00221960618786167	0.0138896426851298	5.82458284950888	6.06736609951104	6.50998426940079	7.25926735714967	4.93865472865002	5.80213718841731	5.70565980332567	6.96227698765158	5.17513528694603	4.37193263835642
ELMO2	1761.13448848228	0.441865650351584	0.00144887036412982	0.00984865044984448	6.57578150030294	7.20665980573633	5.6846767132316	6.50793598661276	7.48548875819237	8.02218034241812	8.52686013004695	9.40336973524135	9.003877390127	8.52154633866242
ENPP4	405.981402627687	0.899938008991641	0.00465796717839189	0.0251943682699044	1.35396990287927	1.57259674448945	0.76890319689681	0.93371247101704	1.83669558394767	1.93481737970217	1.37984593886782	1.79527004388778	2.16886531418189	2.13016336395381
ERMAP	309.037448728757	0.860316373076469	3.23566738992955e-07	7.2968121297309e-06	1.20432638963701	1.36130806736678	1.06084675357831	1.15932789258524	1.31686443044046	1.41579010331143	1.58391861302189	1.6363342149253	2.09264621116621	2.21932591618788
ERMP1	730.964184307609	0.628246252426686	0.000235043464335162	0.00219271818194106	1.66667573926278	1.83729707650518	2.07635665765813	2.42524990131502	2.42864490906921	2.49298774992135	2.74637158114914	3.28198246975615	3.09644563164417	3.0331197122016
EXOSC4	393.885470961616	-0.811290823282897	0.00116869179610009	0.00823740763912384	7.343345635136	7.4303181330658	11.4222541946327	9.24174147290768	8.88711987448094	5.5565252035031	7.09809820843872	5.41979478624601	4.40939203189533	5.61577704720561
EXOSC5	205.149103798024	-0.958180936667207	0.000716477692075666	0.00550377856979358	3.67235928360653	3.28725373770084	5.78166210509224	4.2434148984935	3.25101972918408	2.69255219717337	3.09317004121609	3.317478300579	2.08815235333668	2.25887414123199
EXOSC7	424.999446172676	-0.367776653563811	0.0104413789103912	0.0470683775435892	4.9168146945339	4.85528129290391	5.48809255488429	5.59569320624075	5.37361401495526	4.8548841814139	4.41604620415776	4.5234381288511	4.29052823576345	3.73023837763425
EZR	4296.40393658296	-0.512971503854657	6.87285469400656e-05	0.000775463788981016	22.1032221616637	23.7981468332053	27.1790872742818	28.0981149092126	22.7731808826556	23.3740481037531	24.9655561784135	29.0023097167159	17.8413123145435	17.3192680506174
FAM122B	803.53633250121	0.563997688971166	0.00299885952336185	0.0175998640879269	3.52051796477649	3.69844356839801	2.80899228710207	3.04347081760784	4.38910675578196	4.33534090501657	4.06687668633282	4.60250003034501	5.33585276944843	4.27783012448901
FAM131C	15.5625946187196	-1.92778447811338	0.00143768415589414	0.00978422357817223	0.203786006476915	0.190709474458178	0.211550085918699	0.229370032562765	0.0914632099071358	0.167663215005646	0.237825617570854	0.159907574995143	0.0491536118901434	0.0610496554925035
FAM133B	446.887013734278	0.366030809069263	0.00948392403573977	0.0437508055382959	2.64796237930359	2.82077611870346	2.35496973166415	2.66023723092716	3.09010723340956	3.1846434786247	2.80547295087498	3.30294732581352	3.46167199350611	3.24589700954581
FAM134B	27.8462543504014	1.12688504250636	0.00934264998241897	0.0432383779417957	0.112272063811249	0.0985010575060811	0.061806572764911	0.0968814443611665	0.0892321741189152	0.144329518585326	0.117275952308219	0.14683011339635	0.162481542656131	0.241044801710563
FAM13C	191.294068740043	1.37091355568035	6.50570044501065e-08	1.75225637064362e-06	0.665519379051912	0.677439651662745	0.459773749326884	0.480067646196282	0.613693035209246	0.524672820346576	0.68339389870002	0.805453310327566	1.56090286006084	1.37689557137031
FAM180A	9.29442807217549	2.55652723452556	0.000718036734610491	0.00550979106854834	0.0153976678297493	0.0225150483101999	0.063573945611881	0.0346614925387463	0.0431923709194997	0.0593826614501535	0.0748734731608408	0.0922953493656033	0.222836985208575	0.172979673502635
FAM182B	35.0435980564614	1.21560886608113	0.00411805903304963	0.0228494434691395	0.0874365740899756	0.0403746452107568	0.076001776333885	0.0725153396010578	0.125862468512062	0.141982307695621	0.0571870759807779	0.102814785814584	0.191473955324734	0.130970050837187
FAM216A	46.1821583504204	-1.01723821898741	0.00441444904979542	0.0241970948872997	0.683708080901839	0.519866692393206	0.655987342807068	0.64641632608872	0.460292662875852	0.656267554593105	0.453135200342101	0.695456021428582	0.241870672472445	0.382337014042992
FAM49A	229.877360292392	-1.31469035792812	1.76505161835269e-06	3.23010085301093e-05	0.770147173624155	0.901773443221328	1.20786631162582	1.35172997772658	0.658040228992181	0.792798759090261	0.778007106469285	0.951890761388412	0.451947534189913	0.388950875989013
FAM53C	1279.39365417612	-0.385452006765906	0.0014447760691223	0.00982470596430457	5.18488688237999	5.35268515453072	4.80077925579062	4.95481327998589	3.98274771461738	4.5091335080609	5.19254280774022	5.34282022167029	4.03501290658647	3.68483904490398
FAM76B	452.679650431391	0.424071506327127	0.00390139064659291	0.0219161480454568	1.8244210369328	1.73402903317997	1.57275653910711	1.95869007078011	2.12582532459769	2.16945307623568	1.865294241454	1.98067705050285	2.44568572018864	2.28081636502292
FANCB	305.679348704752	0.741499760452055	0.00461208731405187	0.0250249789721084	1.60500642068344	1.77530595850098	1.07959433941495	1.24229548382651	2.09631629423351	2.09284982521786	1.85858945313581	2.14013615668873	2.60675542937399	2.13546227779449
FARSA	617.02862188257	-0.554074051099436	0.00584461426629917	0.0300610151308246	5.74677857979998	5.38327150223466	7.7413911720929	6.82198218165792	6.40199279760815	5.78124232202803	5.13449208360606	4.90117148843047	4.06094249555427	4.62905306303347
FBXO32	386.246541353145	-0.718075125813056	0.000169851603145436	0.00166594175139907	1.00009581632959	0.916540097185027	1.22451300942863	1.27394084189872	0.963128932081433	0.895597285532021	1.03323692217617	1.22482618287563	0.671674977748701	0.660807588321261
FDXACB1	125.183686790774	-0.559024498660288	0.00521246475864833	0.0275942681492954	0.786893143913873	0.760470357267948	0.810898087743158	0.794060200400848	0.640634007063594	0.738335399299264	0.806326580120362	0.828014566413208	0.567219214469272	0.494502209489278
FER1L4	90.378590847642	0.552869857923658	0.0107551816889283	0.0482173342401628	0.179590172639566	0.205253307760426	0.214290127228052	0.204459975788329	0.193981458305169	0.172488493441075	0.307824314301177	0.276713666511247	0.293762533016698	0.290649802451045
FGGY	176.427988894518	0.486676220280426	0.00994752284544793	0.0454139831498877	0.721028673278831	0.977637741415146	0.82479258779522	0.865652478644945	0.96225537536125	1.0561118066543	0.892464427486972	0.942965848009495	1.13834374196211	1.21093040268884
FIBP	1192.93953511428	-0.334152699387109	0.0010647709672619	0.00762693801643536	14.4489113239459	14.8635265286518	15.7362426685283	15.875411791701	11.9634824729671	12.4895797751809	13.4743794032281	14.2358545747573	11.7861683157637	12.2179559704572
FKBP1A	2648.60873675132	-0.718957284028658	2.71739456640161e-06	4.72150740435241e-05	21.5933979113388	25.3815736145907	28.2576387697362	30.2358126756346	18.7754230007717	23.0462513259554	18.5393226660529	21.9745197750462	16.3117528664358	15.4338175828982
FKBP7	76.1249897690146	1.27326872237405	8.49898979205663e-08	2.18960480639732e-06	0.315127270015666	0.314175635382258	0.270358148871305	0.32781906265489	0.308050547623698	0.325312969662621	0.438552404301627	0.697282927742252	0.765851864927191	0.708037254496012
FLJ46284	101.240218426331	0.730667562418322	0.00411173423198647	0.0228217186829637	0.33778347897104	0.427662172084607	0.393609657915576	0.547102723659335	0.589314091106205	0.434232036456802	0.391712781881407	0.475874681736884	0.660734942290126	0.740431115812823
FOCAD	1955.46081814105	-0.590778369420478	7.99749430474977e-06	0.000120657543575786	5.32697423237768	6.12301651035757	6.50939576513912	6.99673869152793	5.36589041025935	5.90062920117957	5.60388315417938	5.97906384497097	4.26829452729359	3.9453099509056
FREM2	159.046571119113	1.64269090036741	0.000743430648746259	0.0056577113676066	0.14756114215311	0.137992087016882	0.054650419029981	0.0540746734854566	0.109498219007049	0.110287684353964	0.198389121153957	0.267406387167042	0.33626216425156	0.280142447103318
FSTL4	88.4848841141964	-1.98098116054818	0.00132582737133788	0.00914980624460649	0.533292303103434	0.614045441015163	0.173231155032088	0.176883418422483	0.13008270907361	0.149035915930499	0.545646734627445	0.65139607472938	0.0932110299053891	0.0964747900341401
FUT9	236.479939374259	0.987629717713623	0.00152286667175019	0.0102502706178438	0.291439784959011	0.307337974265275	0.16870449889719	0.189012520504253	0.275040870931189	0.303624287300573	0.292682722045707	0.304634051098343	0.495207084852724	0.449526387341636
FUZ	96.4177950275604	-0.896970839227448	0.00029553800000787	0.00264644345603712	1.04825841022393	1.03348069260986	1.19911426395154	1.21561387979243	0.980165017509976	0.847336615268547	0.892459018513309	0.917407891595848	0.517177075207014	0.689924044854457
GAB2	1488.43483420569	0.691673639063279	0.00381928776632048	0.0215111900938876	2.6148084444661	2.75706081636114	4.21769117299487	4.10679907674009	4.06660743561292	4.84491003035002	2.2440883561745	2.61708901603661	5.59368418599197	5.36212947493024
GAB3	107.088937001385	0.675077734991424	0.00637022026330999	0.0321202655530279	0.2777701752224	0.267985804257216	0.358076581724841	0.367435443984932	0.240983457329675	0.305545173535498	0.408458867352173	0.396350838765843	0.452414229289242	0.557617113550487
GADD45GIP1	147.835850639341	-0.836449342642638	0.000202816133729441	0.00193520743452891	3.88891005827983	3.66700201633058	4.56614716308004	3.49761943599287	3.18600344143263	2.63983040185782	3.65247783315238	2.71329412801392	2.12587116672031	2.23206501897913
GALNT3	70.849391591437	1.25922817190536	0.000544661861252582	0.00442737437264161	0.24191588405243	0.173766277347224	0.210278560233237	0.396487900915933	0.440497401432921	0.44193460029639	0.39899669724697	0.462542572300001	0.619335509815807	0.597580264176208
GCN1	8397.05476565764	-0.428008207904616	5.89653622019491e-06	9.21146167343903e-05	16.8825035926159	18.4386543965494	19.3532518547368	18.3808369395431	15.4694948915379	14.9437081826957	16.0184113839217	16.3472934649208	13.5389257513796	13.4203609557772
GCNT1	166.376025638495	-0.884934940780083	0.00101530236605971	0.00733990570398405	0.398282598150474	0.425472085350534	0.623203900836251	0.573711153869016	0.367586747406772	0.392626126016161	0.361251414336678	0.517278038773544	0.303630178498775	0.238014607157066
GCNT2	114.864310461098	-1.12117595562708	0.000108809648296933	0.00114922249313737	0.277198080594363	0.269294221186293	0.380752233485057	0.399614544969422	0.199719618716672	0.231869926989228	0.340569671170203	0.353830817216763	0.176310903040814	0.125132148861589
GEMIN4	981.217216884943	-0.435490515332052	0.00173413507236982	0.0114130130538502	4.25864054074098	4.86139975942035	5.13741911464552	5.5817372164751	4.53823834554361	4.73133458339233	4.14526046343425	4.75837240204072	3.51337561863434	3.7585340349153
GEMIN7	396.888229251754	-0.51574582263248	0.000476716147647208	0.00396387389754484	4.01668594457975	4.31103822029198	4.88046583050851	4.41245218053211	3.86468493466462	3.20142272250243	3.65460536201145	3.91352017911781	3.05182416627082	3.06843491519709
GFAP	14.0820733857072	2.90226520434182	6.57146781063461e-06	0.000101368135420059	0.0240602873487419	0.0201039177028607	0.00810940406877241	0.0232122018079879	0.0241043195420237	0.0176744626130766	0.0705694755161905	0.0861574403202638	0.107777275134035	0.175049369149898
GFER	373.399972661761	-0.54205447585619	0.00356519621672616	0.020319844705878	2.50375091245323	2.74370490954222	3.42885734470342	3.27156504477506	2.24423722366472	2.15316994756278	2.42564359639514	2.30213140813369	1.95055978122562	2.12087871666385
GFOD1	89.4174136176195	-1.02419358099336	0.0027005842676169	0.0161865504202054	0.266387422508876	0.299026756501739	0.504698275386672	0.372516874231549	0.31701507093856	0.249054546722437	0.212256940657551	0.184748641128194	0.178481124020274	0.173310884986927
GGT1	498.383963912103	0.565091839925917	0.00692598119568144	0.0343679066897459	2.67900535329178	2.91586519806028	2.08305684628514	2.26019195353189	3.84242292467231	3.03067740118132	2.89490356065329	2.56424369882585	3.34328795873352	3.96399351800276
GLE1	1203.19730969957	-0.413895411251604	0.000515573039447603	0.00423506242748022	5.62342420608472	6.47227387894023	6.59190908876089	7.05188361027342	6.5119123381622	7.10760367667821	5.58299183355198	5.39044302508479	4.90596043858923	4.67171868686491
GLRX3	2394.42657398511	-0.458745075934679	4.59773811769313e-06	7.4046421569296e-05	24.8086695319378	26.5048908320685	26.5832170979454	29.7342762084701	23.9609038357231	24.4205716351663	21.6983138048748	24.1744465906956	19.9001409814706	18.9491841341415
GMEB1	694.134115082884	-0.378679594176056	0.000676934639066076	0.00524929821196365	4.68877560924571	4.87678955091355	4.60828174353968	5.08045937737763	4.06416722296295	4.98879749114586	3.85976675999736	4.49860252461281	3.81118933991331	3.53860935209143
GNG2	39.3919923385142	-1.17537240467443	0.00605725010664608	0.0308682638886732	0.142723622034887	0.240000217744058	0.189410720613003	0.29317102473923	0.130116183780011	0.247692629810998	0.138803010975475	0.167211639473177	0.107578864931979	0.0801689119861671
GOLGA8N	11.0020845764066	1.8557125665843	0.00230387492880672	0.0142768794722736	0.00260328186712652	0.00304529323019564	0.00429937576685058	0.00527419297586026	0.00657227610899113	0.0113784621031839	0.00731400175699484	0.00907890253436434	0.0125583408546632	0.0148177974230199
GON7	116.903000428327	-0.532305967961282	0.00865703373047999	0.0407791852041031	0.925552372988188	1.01718814557548	0.911021900033813	0.968760716102592	1.0335546878457	1.13677905263315	0.637032904207645	0.873780677652033	0.68253301081742	0.626958158459621
GPANK1	417.94953302125	-0.482183234001083	0.000245343912139442	0.00226910106900117	0.313660364797953	0.334463846686294	0.334613747299457	0.316714965158781	0.261256965583506	0.302051802829498	0.28571120843414	0.301731686170399	0.236252851478125	0.225585083071222
GPAT3	469.866621988305	-0.874701117781599	0.00281611262438868	0.0167562601584124	2.32042379933507	2.51179943983822	4.01359718029223	4.27812318599315	2.95504108928409	3.26359073125563	1.83570122474095	1.99104632007557	1.7053981902731	1.83382133539556
GPATCH1	382.796468878107	-0.343601256233198	0.00832060937854926	0.039694989328426	1.94269673895388	2.11304988923647	1.96298800654793	2.14178268545585	2.03239760619229	1.75534613035708	1.98310921938281	2.17796596330594	1.65636240997251	1.53248832880484
GPC4	426.613469204596	1.07858488859431	0.00347073240679634	0.019900255481611	0.907199992193725	0.971705594667107	1.90695671699169	2.02537814795503	2.25157968572888	2.13569992397766	2.72308411071636	3.06375422059556	3.39483907076742	2.67302809846708
GPM6B	22.768468833042	1.3904600560867	0.00168722559879232	0.011151263342172	0.0626339915559087	0.0343446657312282	0.0400219619964768	0.0528729656089346	0.0658860474528676	0.0805181052299841	0.0648615320647784	0.125145058691851	0.125895417015071	0.125091468013098
GPN1	1337.30773949004	-0.396016360526545	0.000705092097128647	0.00542601997181311	11.6544275279537	12.0269007475344	13.1501297382571	14.1241709302929	9.74837443444398	11.7775159494258	14.9601855465164	17.3215474830887	9.78355088741029	9.42994868557817
GPRIN1	1607.50935027926	-0.653430815168058	0.00280487873812695	0.0167067716589163	6.15187142995411	6.04196778949195	8.86634023843026	8.98996219718226	8.1153928116498	7.22645689169698	5.00620664286861	5.25375045617658	4.6017452590069	4.86158659851983
GPSM3	135.050408847402	-1.53611355589108	0.00268838603456552	0.0161469057248757	0.12911243778092	0.11956893584647	0.368078972759141	0.312441603943291	0.0980894487020105	0.125866943013982	0.141842763765778	0.130158338473776	0.0713675201425059	0.0870280911865976
GRHL3	13.9163378296686	1.76382180267078	0.0013718875181208	0.00939972691841623	0.0364670949521343	0.0414738769793528	0.0238992811319608	0.0547270731112935	0.0568304062142161	0.0625062380314006	0.0306490640995753	0.0529909965062807	0.141712362415481	0.121385697244592
GRIN2C	375.311797020043	1.05532214321996	0.00368262967319675	0.0208371117234814	0.64681653548133	0.664950694955579	1.46606924484704	1.10951550589409	1.70743823951997	1.33621673674188	1.51691951757201	1.07124068268289	1.79858362760932	2.20002612655242
GSPT1	3997.92689797593	-0.402230083815193	1.17048400921975e-05	0.000166365568357586	8.93041659411002	9.98091888857257	9.32292203984429	10.3928488203767	9.33093278547244	10.4508569970956	8.20847134419332	9.70161149892872	7.43393813891595	7.06640731311602
GSTM2	47.2475783245783	1.1396233458204	0.00227969861767309	0.0141730611599473	0.281709412838583	0.411926085796202	0.267477722607314	0.19333916025236	0.568580047266492	0.503472569911497	0.319261445985849	0.299529550783767	0.638056751688337	0.61751514762784
GSTO1	2069.78786472316	-0.729826628189053	0.00293985128375498	0.0173543127653884	24.1748321583926	24.6857309926102	37.4954763543221	39.6353307258039	21.9562235455119	21.2943881895995	19.9697269324876	22.713040025293	19.2112201842483	18.3909524017692
GSTO2	405.349668405009	-0.5978439703021	0.00105957874678652	0.00759607892564851	4.17449550147716	4.5876356764303	5.03756588516017	6.06204668486649	4.29039919376692	4.44777129571291	3.29607471240562	4.44504865602464	3.2897576325917	3.21131164578455
GTF2F1	904.97181421308	-0.644907939818591	0.000148367660482793	0.00148885967512325	5.76691551290135	6.69203545464841	7.52752969027134	7.86740470483092	5.47362135424164	5.56191989574639	5.56209885138955	5.05288504860683	4.06416167554552	4.76280646301512
GTF3C6	757.132653760201	-0.369385582987066	0.00491274401422525	0.0263156462407876	13.3547619903481	14.6405405139872	14.6521310249617	16.8876994231647	11.4432389880381	13.209037540929	13.4689409226812	16.3201671040043	12.0222801436982	10.8217904581917
HACD1	224.403604156809	0.42643423042399	0.00444397830876035	0.0243046859509032	2.47183226641209	2.6991701412244	2.61556512119603	2.84185784981315	3.06515469880641	3.50493248289132	2.39590658496973	3.07543742360591	3.54400174285572	3.5436172104641
HADH	316.710920643192	0.400816764244499	0.00514617804527798	0.0273022301729104	2.14016473890832	2.26950111799465	1.95965327233914	2.25872214785914	1.93878409334634	1.80039557103693	2.45676878666875	2.94032063729045	2.82235010201152	2.83338738659707
HAPLN2	10.9544575893033	2.35520894915346	0.00189490437312534	0.012245970946892	0.0313169957779543	0.0114482219104094	0.0831225364542211	0.0528729656089346	0.153734110723358	0.0503238157687401	0.0507611990072179	0.0511957058284846	0.28326468828391	0.175909876893419
HCCS	271.085601160154	-0.514061864327105	0.00318991630276371	0.0185563716136397	1.90092901590095	2.54725853013038	2.12442292447134	2.25881193646415	1.56833588762135	1.86871808136081	1.92057308994188	2.12943134885298	1.56148256719266	1.4986187503198
HDAC6	1548.7734596731	0.415333069570219	7.18972917517681e-05	0.000804350951472906	3.91045254851096	4.10323353638923	4.1028798353528	3.98793722530675	3.98794892739023	4.23500898518993	4.60242814848385	4.58354793749283	5.14503317133202	5.5231021426056
HECW2	395.314019934319	-0.680575887153298	0.00534913560673767	0.0281316447700535	0.781268436862481	0.966000047804251	1.24013406099792	1.33411443345369	0.784232921129594	0.652333147286459	0.645587672831475	0.77632797837029	0.711282157109274	0.622413083453291
HERC2P7	18.6719132258145	1.56210691190468	0.00272653584375564	0.0163136462183485	0.070742856534129	0.137923816349218	0.157632288046563	0.0796241684467884	0.352786666784667	0.202094053801448	0.178369213178141	0.154196590173888	0.350746130558952	0.294346553267428
HGH1	635.874733942451	-0.649386869766093	0.00695905906707471	0.0344723179615485	4.0429919841757	3.95723101368925	6.28804344944002	5.43847856488866	4.03392596934611	3.4931050930315	4.62336383300622	3.68378151776149	2.91364200528519	3.32338308313419
HIPK2	2522.02447814047	-0.608628497321256	0.00375139130176607	0.0211751914589913	3.51535077434881	3.8885004223145	2.72127685129763	2.7471253334469	2.1459161386488	2.4574079441418	2.27525308065027	2.58156994693883	2.1889696629687	2.01347658263772
HIST1H2AK	276.619649205708	0.657570737450899	0.0037362213064901	0.0211055972816325	10.399199910517	8.68290390795	7.96498615979114	7.5656807705918	9.97734378594592	6.12239542642492	9.47838488462276	6.34016153597592	12.2870779621284	14.9447167746086
HIST1H2BG	4.34248591527141	3.58835797411853	0.00575144619787771	0.0296884504248515	0.093686485680333	0.0456639662237275	0	0	0.0876007432725439	0.08029142137517	0.269964214539889	0.272275060126866	0.48960982870574	0.374217888262157
HIST1H3C	7.96559907868775	2.51219681292503	0.00407866280501736	0.0226674455502646	0.151041393035831	0.132515039237484	0.14254176912169	0.0340007342387157	0.169475947769105	0.194168796789627	0.0652854636469011	0.131688591172471	0.364315005774004	0.95021993195979
HK1	4203.03014221862	-0.647641208538642	0.00293784879381985	0.0173511138917361	14.2393522415916	15.1904220508858	21.5932592443915	21.9992112592443	13.2255831838316	14.1227039826341	14.8274236167236	16.3098836972924	11.723175532795	11.3573806178547
HMGCS1	8829.21335877443	-0.615783687150587	0.00667628144570949	0.0334113749190783	34.0269446428123	36.0613411510762	23.2654103061039	26.1689970666589	22.2463505373748	25.2449307949098	33.0950944147554	39.8899547887641	19.8650840811126	18.9690565622674
HMOX1	711.99680327492	-1.04028305681061	8.55135559675742e-05	0.000935964933596685	7.29906106926851	7.00054449737794	11.7479967696021	11.3072328565643	5.88313369064704	6.68145820439717	6.38898328862985	6.20607332804264	4.49076672494745	4.50650126760984
HOMER2	554.614215834029	-0.562314482881967	0.00052709872356743	0.00431082858090868	5.67988428847513	5.75063381871701	4.85280662247387	5.20994684505743	3.69031323918614	4.51881086865979	5.09964027556298	6.34946260321454	3.93707106465741	3.29469544394664
HOXB9	1073.15681981672	-0.482207513762594	0.00724308877224889	0.0354905153870331	6.15221802113547	7.08116198005368	8.92347110144061	8.16731637148191	6.84979411895779	8.89254255537133	5.85447395253586	6.4698604843035	5.61737307402937	5.14611966008509
HPS3	612.053542915609	0.358962995476749	0.0103376809992963	0.0467357827655638	2.12567806356898	2.18019172813774	2.36496265439773	2.67979969581969	2.44917166466032	2.53405092881664	2.64171327785654	3.07056237279667	2.88758244113928	3.06330286130219
HSPB2	17.3592778154352	2.18833157312881	0.000444582311794558	0.0037523096492523	0.115409273679935	0.0723239036979846	0.311185122600979	0.148455048899601	0.346861444824698	0.572255386115064	0.391945667007377	0.341396017721498	0.73569105149345	0.74087132456182
HSPD1	8628.72532959464	-0.342628651736343	0.00550649106835455	0.0287173118417616	67.7171764288015	69.5136034400058	59.2157040850617	66.13473604751	60.3379247615611	63.6230409549577	57.1027508670985	66.0776698260104	54.1819416388984	48.7510971355119
HTRA2	696.72648462302	-0.362596623164377	0.0029274962761023	0.0173111135610949	4.53542713654608	4.85202298820269	5.31903860371003	5.10482092455875	4.72081074203703	4.38814069721778	3.9916579034583	4.33727935475377	3.90606868862458	3.74160755760132
HYDIN2	85.6747015912752	0.9623524082417	0.00519671151016162	0.0275278331043827	0.154809336662709	0.155485109758293	0.110680058689843	0.0827222104129711	0.186424498201523	0.172879645527771	0.145318506371816	0.189167757743493	0.233848571880379	0.255309700579893
IDS	5854.81450785346	-0.393290499996806	0.000253848891110804	0.00233269483681714	12.7932383330456	13.4101247094738	13.915220521142	15.1797624932908	14.1758283527702	14.6477281442823	12.6201554346728	14.6258932726821	11.1255717844655	9.7710746444871
IFIT1	49.2770193966323	1.5388950944592	0.000469264439118097	0.0039158113665414	0.129036885522489	0.162953138351677	0.0588120465554436	0.0891224829569383	0.152189616167656	0.188501433431554	0.244012705337609	0.281258755004148	0.34307100258198	0.289923884243714
IFIT2	105.48685423076	-2.22670652999723	0.000717246566099416	0.00550722296329417	0.269774189381079	0.295855465284717	1.05300437811463	1.23243176431973	0.250395257594482	0.25500279750054	0.32581088896402	0.397778671532983	0.16267524978853	0.136677863910341
IFNAR2	594.750151222225	0.576689842120778	1.13097237846382e-05	0.00016152757485319	2.56007282020947	2.71142612216589	2.7666194699943	3.11830698509028	3.18486723786578	3.80951444470898	3.35850675309432	3.25826218806892	4.39859402228969	3.85439692467552
IFRD2	1639.60769711137	-0.705697813298568	2.99242141280617e-05	0.000374248686736982	14.6216662563551	13.5838282682373	17.9543321173745	15.3325416293324	13.3153129774267	10.3787226788114	13.5195236913002	11.1847728646852	8.74558123178026	9.9857089131007
IGF2BP2	4345.68220409815	-0.545757673971438	2.38031135077597e-07	5.53494861322519e-06	18.2654417914087	20.4851394891612	17.7437016491417	19.0098841274462	14.6447342707982	16.6508545215566	18.4871603709966	20.6391127445017	12.7131393993923	12.9654598255267
IGSF10	82.6950775293717	2.58955033638567	7.6352259218938e-07	1.57696781540653e-05	0.0788983719169756	0.101523983628854	0.0316448567331441	0.0301932092027653	0.0686091174691758	0.10954063496592	0.180744221479249	0.208087306962782	0.374899917686387	0.349815151267253
IKZF2	651.957890222795	0.842808923018222	1.16826163678475e-09	4.51132763292341e-08	0.914515129840451	1.00345360111764	0.811228409113272	0.95337946150203	1.02895045747815	0.939404642011955	1.08750183772848	1.26579147464964	1.70371772880372	1.57413293938066
IL17RA	874.412936768013	-0.631191586898278	0.0112036201175312	0.0497285129690449	1.51574459662275	1.61812131613513	2.56713039928794	2.25900277897315	1.30131066958024	1.37081185536483	1.79629070074194	1.8643313567539	1.25298883636644	1.29324276719594
IL17RC	230.996371115789	-0.624662266392013	0.000725255779137206	0.00554937709488144	1.54817163526072	1.44059664111901	1.76333697797266	1.55134746672105	1.33415594724359	1.00447181756784	2.04528366248368	1.72957085359203	0.954041154602509	1.08316234756174
IL24	324.570402880566	-2.89223230039223	1.16295825457176e-06	2.25301856218277e-05	1.54840706095621	1.84409508873184	5.86823359513234	6.79770717909135	1.31679985390179	1.97251557575443	1.83975360252259	1.84786575672761	0.464736347688971	0.598200247355903
IMPDH1	975.823188682087	-0.557884928863218	0.000438736952873924	0.00371209049639858	6.69705939392707	6.13803847559832	7.8224942423334	6.85879966826902	5.7737697935217	5.10301155830358	7.32989857678888	6.17710976446504	4.40215075349883	4.89041892587422
INTS5	801.852485644091	-0.638355081690785	0.000635879275063402	0.00500318198841094	4.1364651090032	4.21543046736007	5.79080818624302	4.97407453738275	3.96643365429473	3.84709562910472	3.30675344978653	3.42246020784126	2.97281044711587	3.12326692313045
IPW	287.879900958106	0.615517858475289	0.00100179676635124	0.00725753610159349	0.955610485329853	0.991653228264496	0.756377711293131	1.04782431718593	1.20194919337668	1.24432067612725	0.96600134126712	1.17584327322463	1.51308979932546	1.33904777936403
IRAK1BP1	89.8660467985245	0.685944765512299	0.00270025684268706	0.0161865504202054	0.353878419228729	0.435132040094777	0.34629836557138	0.362095986440151	0.462495339481842	0.563483704882936	0.447578431675543	0.381287740087753	0.630472053205767	0.560187247756706
ISPD	101.207887482573	0.616914875483328	0.00630864616261326	0.0318752648216249	0.24347631941109	0.271603054715205	0.272413732190022	0.288169148368608	0.366134315835716	0.296863140870107	0.292933653503275	0.306383376855285	0.466183390625295	0.349660686145025
ITGB8	4093.48966251028	1.55883240179357	2.35286471653288e-06	4.15963243712974e-05	3.19744493090066	3.4418882869966	5.88519511965394	7.10171015611127	7.48248281040977	7.55879193569112	8.51660662889854	9.90832116807237	14.8949590321271	13.6512357701758
ITPA	452.870115166906	-0.815032153288763	0.00316038119379605	0.0184219777592237	3.25163907252511	3.19149001566953	5.5773310367088	4.74850915159397	2.9987676191765	2.88761703877309	3.04611067498163	3.1415343846625	2.29458263916614	2.43052715173482
ITPKC	538.521957263043	-0.343347392041894	0.00840705969051776	0.0399742428671436	2.84191562823342	2.74242730641685	3.13993922160782	3.06964573312757	2.7166578996092	2.3425840276589	2.63729364694342	2.67771987661684	2.29644339212565	2.32471534868586
IVNS1ABP	2444.70267909987	0.514038017653359	0.00297294106631747	0.0174955545491779	7.42976892868561	7.68211678883211	9.59040643784943	10.5107694879813	11.1941608051255	10.9096136107143	9.23102095196842	10.9582768453894	12.6799321523804	12.2368982099576
JAGN1	559.485253054895	-0.3311926975275	0.00810400912396773	0.0388666739565341	6.06306388027728	6.07754891354494	6.32365753456191	6.49479646606976	5.0788353726276	6.37517759852571	5.42207982157919	6.36167886263851	4.6797558908157	5.18600990265354
KANTR	404.365090894507	0.490594142327166	0.000431280848917623	0.0036598173371854	2.50072932227042	2.77805775200463	2.35595424446685	2.50551593027525	3.17835598125294	2.68510684029304	3.56178952142433	3.53614846454902	3.62322775552582	3.44580078622244
KATNAL2	9.54537561473597	2.5383774304154	0.00114629161615316	0.00811614138111907	0.0342602185544741	0.0143133081562549	0.00577362089894598	0.0330526022214695	0.0549166678616442	0.0251672369153374	0.0528874476066495	0.0800102321057592	0.112149352818747	0.146622610649839
KCND3	31.3695177066428	1.37010929606582	0.00116170795329741	0.00820501005732127	0.175057703655193	0.127987975141736	0.0850328080556982	0.133288433478694	0.252750752034039	0.238280371195826	0.178038041226455	0.145894137305261	0.29805377672532	0.377900314567001
KCNG3	36.2605518522006	-1.19386074546987	0.00314895539171355	0.018361604835835	0.242938073223374	0.201475532982932	0.149707996923376	0.208138908941971	0.152568240113793	0.116531743889172	0.227252825994744	0.213391306276207	0.0830855430270683	0.0923312179851843
KCNJ2	36.109847168325	1.53622347747027	6.13581772011525e-05	0.0007038577550231	0.0437644259137983	0.0715226919909702	0.0911065800596767	0.0782345153027115	0.133596826075135	0.132377983997681	0.0890190206132273	0.106614946492306	0.19870251781688	0.208230785577735
KCTD10	906.13592343675	-0.426554600001804	0.000767347233621714	0.00580629452336219	3.78666970583739	3.87298814462555	4.41594708604588	4.32573056227117	3.68225845695518	4.02092964064566	3.07067287654118	3.51036844978539	3.18630061421437	2.87088971729413
KCTD2	1699.67343475129	-0.743696212472218	0.000326310550025369	0.00288653791044326	6.70454559341438	6.99904064120042	9.68941684623768	9.95431225858012	6.22124551313739	6.83644956908947	5.20171957015722	5.93683392467534	5.05359515503267	4.81210184497109
KDM2A	2911.66944193902	-0.427881712041235	0.00122943935756314	0.00860207081448085	6.19744849439004	6.77228830194386	7.72869530815167	7.8092394376409	5.96886838309087	6.53864933838421	6.32775885567702	6.91685274957921	5.48584137390013	5.02530175857024
KEAP1	842.3808361471	-0.435139598671559	0.00500590396350683	0.0267230362562602	5.446649934621	5.47216954144066	6.67952788278619	5.93976840133524	5.04004276362582	4.19055226629312	5.5194738383669	4.93451924038142	4.04276355926046	4.60595578908969
KHNYN	2904.75894172239	-0.689010239994019	0.00480522871319451	0.0258826863979592	6.83880686027452	7.07106196750254	10.9222880487407	11.0170962569011	7.20070737968759	7.47209459511049	5.4706563166614	5.5951952047389	5.6131080847542	5.39536819310929
KIAA1671	7697.9021282373	0.500136368128019	0.00156790421154776	0.0105081380543045	9.49081417409864	9.92874045703628	12.218402944981	12.8907689394859	11.1543443848058	11.3718636054604	11.6748718045781	13.5719154292083	15.9093800943422	15.3066670196287
KIF26B	28.6540402841431	2.04919685138914	0.00305890415488984	0.0179094408850518	0.0334697385752868	0.0207627250418177	0.0083751500290394	0.00684939083413233	0.0512109677590645	0.0325958151292659	0.0482227058669013	0.0431087241346354	0.0599356944983039	0.085075648944392
KLHDC7A	11.0733239060578	1.92482873594694	0.00241686344695607	0.0148751366305491	0.0246767646680252	0.00801850939423968	0.0226412252416448	0.0216026021572066	0.00384563278752319	0.0317228119255665	0.0622193577311133	0.050799193045224	0.0826678799932114	0.065711980379038
KLHL22	763.451601825798	0.37554705287283	0.00607238853267229	0.0309270671444697	4.37275225595132	4.6191824915855	4.91450346073286	4.38480799176007	5.51603395826702	5.04215393865173	4.83969677040689	4.33235832483975	5.54205846684948	6.24819420201017
KLHL8	771.001888499868	0.403299284799259	0.00552352865936302	0.0287538068714008	2.14829161116932	2.20619204631438	1.80498932906341	2.03410234760511	2.36530985388305	2.3658675160042	2.4545115026953	2.75688963340619	2.78796196697406	2.59702356141756
KRT18P55	8.80416780470475	1.8718106307798	0.0059163128604488	0.0303299284588163	0.0426633842482747	0.0311920015435923	0.0335521395009517	0.0560227482610224	0.0698110538695042	0.0914086951040397	0.0384179843768303	0.108491139342859	0.120055806518141	0.181063885936074
LACAT8	169.785410894463	-0.601852354275821	0.00490953693495818	0.026306667505557	3.72561112130054	3.57185974583469	4.78883435938013	4.66805517829486	3.99299509639261	4.2923854925281	3.62706673793421	3.86879049313345	2.79760678958623	2.68497777623836
LAMB2	4254.80025349104	0.719903432062465	3.81433826920523e-06	6.3329071321761e-05	11.0939123012333	11.2055976619672	10.1130845062173	9.03920759648403	14.5152078690079	11.6038522480601	11.1056947089324	10.7636547465287	16.7997956084593	17.175267340123
LCMT1	480.214005067756	-0.512997777803359	0.00111828150935358	0.00795386980824994	6.17373425344559	5.99364555208079	6.93665993569402	7.76899404716722	5.64967246174372	5.41246229696328	5.62136434173679	6.11068706111003	4.58941174864969	4.76021542974058
LDLRAP1	1052.98764584501	-0.612519252626865	0.0038910694572044	0.0218719252374169	5.64072444890733	5.89937991715438	8.53221762121944	7.94407751320694	4.90325386876099	5.08929978431043	5.82474237405305	5.49875022622141	4.57506411867684	4.50763615423378
LEMD1	63.6829606334989	1.20573282966723	1.43785361512555e-05	0.000198937814189351	0.621063327989208	0.760305037625063	0.868947987856679	0.942882861357386	0.830564547152807	1.18831303635252	1.65437445222725	1.32223576074109	1.72446231014339	1.92546797819888
LIG1	2252.5281106751	0.338371603360323	0.00244834864350481	0.0150312336870263	7.61878851568246	7.85490787959213	7.86060950140213	7.26888845756343	8.81163072091254	7.62877074850907	9.59633258175145	8.90653272988081	9.41804726323896	9.81171351139898
LINC-PINT	1397.07028883485	-0.555027205464066	0.00792196061576338	0.038206600887378	3.38207156748245	3.79887120458815	4.98315759637443	5.25742721114193	3.84748900080358	4.36212542827325	3.83325698151418	3.80520517211135	2.84762624692014	3.0215064922008
LINC00473	4.19665530559328	3.07756379007776	0.00400736132092912	0.0223652149850101	0.0056966310109652	0.0166596557135045	0.00672007724187098	0.00641180649776932	0.0159797576060023	0.00732321098820367	0.0369342988667966	0.0124168166286286	0.0824423603863277	0.0597303408339556
LINC00574	15.901979231802	1.7156254213121	0.00319710191959035	0.0185793031404263	0.0405268897525992	0.0434572897577329	0.0159359586971102	0.0212868977219395	0.0454731839590914	0.0520986814456968	0.0437929089252645	0.0441677684247108	0.104268488012638	0.0930805016302889
LINC01004	887.034374410215	0.567254476909805	0.000190082885564001	0.00183093290668822	1.45442325959454	1.55844101565077	1.29547450185886	1.27912646523202	1.69305014389361	1.72588622330422	1.60981102811842	1.58027357994325	2.06473663273449	2.05066952995554
LINC01159	7.9592575248734	1.76603206332297	0.00932748095969394	0.0431798529934354	0.020950289419324	0.0153171500906585	0.0164761198758136	0.0235804638865331	0.0391787761400247	0.0538646050222747	0.0415041936480992	0.0342486508520195	0.067376716252941	0.0627623051076797
LINC01166	5.38938607800307	2.97279886645391	0.00389224554096955	0.0218719252374169	0.0143983384015465	0.00701793042690724	0.0169851173486126	0	0.0403891277393661	0.0555286465585288	0.0363035989438376	0.0209224864479627	0.0810345526861804	0.0718902485238826
LINC01206	7.09597671414975	2.80792155326066	0.00621598249461821	0.0314533107148173	0	0.00212146081441195	0.00855742806671233	0.00653189788241939	0.0122092905764391	0.0205160250076557	0.0219485397820962	0.0189740703196079	0.0244960576237706	0.0347708993174422
LINC01226	4.20987163968608	-4.98274888522095	0.00273964728973588	0.0163692972972258	0.030351550267835	0.0295874513000146	0.0537066807954854	0.0455493236499687	0.014189978114925	0.032514949918438	0.0109325165318963	0	0	0
LINC01260	18.6086668781326	-2.75513842391568	0.000121473198392009	0.00125974377861695	0.455395674560236	0.245330349219266	0.38170271061476	0.45861318801158	0.0336168798729555	0.261901317432923	0.246047765110037	0.261214621210735	0.0289058924200982	0.0897540743238966
LINC01405	8.39596977974699	3.74560268813147	0.000130159743873944	0.0013369187320561	0.115868522679855	0.0564757688115182	0.045561749322323	0.0869433817023427	0.270854665828757	0.297905775130157	0.542560392174177	0.378833962488494	0.46579550877512	1.61987353303452
LINC01429	74.587785873572	-0.93672903800171	0.00813982617002074	0.038994918568619	0.500520150398754	0.496632426811386	0.857547699535497	0.777969528924014	0.317576222710434	0.421297058440406	0.431397478197927	0.584449473714523	0.309002375116524	0.374861150639917
LINC01619	3.95618243446265	-4.89962867533571	0.00472299467870538	0.0255059524069369	0.0692215047807069	0.0311440875627266	0.0251254500871182	0.029966084899329	0.029873064526121	0.00684512117714583	0.0230153823455665	0.0348185848779748	0	0
LMBR1	937.265285429397	0.756706936441042	0.000145905578157007	0.00147179488626531	2.89221101805789	3.15523999254355	2.11733555178935	2.56914136963891	3.52756907173205	3.66335767341803	3.89742202242494	4.63535761872425	4.50709068554301	4.50634099371395
LOC100130691	116.655302464088	0.566101130504827	0.00802310489689564	0.0385863516787727	0.287645944509113	0.366083613967248	0.298479343188211	0.383713242027089	0.422119140556096	0.48276643716588	0.282046746615915	0.420886197919891	0.49144736670171	0.486713277261441
LOC100130705	73.0581002652588	-1.09333103898516	0.000312289338393748	0.00277762939490589	0.41928582337083	0.314544638232124	0.477409978634039	0.39395433959894	0.306821430552271	0.304655590440101	0.449135836285531	0.429139287509974	0.18467695717358	0.191143373113131
LOC100289495	14.2355795987791	1.48085043386859	0.00916929447359159	0.0426430447960899	0.0532200609545392	0.0363161737521354	0.0376688874259021	0.027954032525331	0.0547392566713286	0.0638551017487278	0.0536750754087752	0.0889352902384708	0.085578601663392	0.132862671433916
LOC100506124	107.166810211599	0.892527546528212	1.55230052209076e-05	0.000213105855526253	0.799270168561036	0.901949167441596	0.99410826857848	0.909391818576478	1.09665592141944	1.45188622862619	1.11715454569467	1.37289069321488	1.66591938824515	1.65267843697732
LOC100506691	32.7645543561805	-1.15243463095117	0.00329471888985003	0.0190627775768293	0.889039696419042	0.774992393469033	0.867246269159926	0.86594964944596	0.791323113704879	0.967061163986018	0.591191670804984	0.409923364260053	0.309285920438227	0.460966301324161
LOC100507053	43.8104094249027	1.0430015646598	0.00871797612251498	0.0409876064813399	0.137937573942608	0.142869064064951	0.111869439216904	0.0679239538501515	0.157191136840142	0.158852209004637	0.173896119956471	0.178516508333956	0.235668392957891	0.236746135527509
LOC100507291	28.0182095466683	1.1715700735957	0.002894952436596	0.0171363633036395	0.333380543579415	0.265899029551935	0.411151217655105	0.477570968782486	0.403825065708842	0.759741121602428	0.360247328910605	0.396361071135503	0.877222754886652	0.794446172622119
LOC101927237	26.7292564283072	1.03459225802785	0.00775697019057993	0.0375904612958053	0.191298516493925	0.176122441010064	0.167160633691507	0.159492458002765	0.158997363364372	0.145730776047319	0.267963968698893	0.285700989254225	0.307610687552869	0.403283355311644
LOC101927394	20.4893312366462	2.02935013501791	0.0112080150563961	0.0497285129690449	0.124030710822416	0.0906811822735819	0.0182892299739627	0.0232669951778912	0.166712409671863	0.146158517329978	0.13402621459826	0.101380091340566	0.286699479385476	0.239970882130093
LOC101927482	10.3868126304853	-3.2116721749247	0.00663631869590943	0.0332570721698768	0.101478109572576	0.0404686646773154	0.261184319468486	0.280353359561147	0.0388170958213668	0.0474376461617771	0.0598124307663226	0.0804325526921679	0.0222515752029631	0.0138184250156685
LOC101927501	250.55116876696	1.3768439407207	2.60813043621773e-07	6.00779000214014e-06	0.815257443613239	1.44690007160245	1.24069878506942	1.59005318785211	1.55369433175846	2.02407898247657	2.12505942307027	1.99403597670111	3.18229484576812	3.33722406727145
LOC101928150	11.6538676381755	1.72853306036952	0.00764436215628616	0.0371180331431538	0.0479502013165047	0.0409001749346816	0.0188549487109095	0.0224875173135022	0.0616487075134156	0.113009597117098	0.0302251001005034	0.0304838215732816	0.125294964809999	0.0897799400513675
LOC101928269	15.9587221826374	1.55641772524629	0.00929306471402821	0.0430668889012569	0.22225992410476	0.324996810164433	0.161348143099521	0.115459953259461	0.383671812705396	0.307701279450097	0.147797917701246	0.204961682130027	0.453619349976066	0.742667929911148
LOC101928371	18.7980752430268	2.45194952399369	0.000140005820619574	0.00142358581155429	0.0793680588476777	0.0116054957088352	0.121715331475261	0.0803989886320176	0.166977947966555	0.193857593222935	0.222987041546113	0.198946258873465	0.421162327224487	0.392318295565048
LOC101928489	29.9632291129994	-1.38055090755831	0.000853489126542517	0.00635457415533216	0.337328329585953	0.359664488148366	0.290158834381646	0.33221802060515	0.246418715237009	0.189720530385729	0.22782078925946	0.245088954275374	0.144082614802562	0.105266562587682
LOC101928796	86.4895004525862	-0.878400230780507	0.00157438614001358	0.0105351446378479	1.48142304254787	1.61514347261807	1.91619822009301	1.56502161262047	1.60390639228905	1.05244219245841	1.67102029515341	1.07634133422223	0.736585531355445	1.05110685203532
LOC101928942	7.3159991495489	-3.27448923700809	0.00595723957343725	0.0304579603778476	0.195040407528877	0.155561133017916	0.271913918270181	0.299354290579997	0.0497375064104981	0.0683811849563468	0.306557829298492	0.17391482421147	0.0213837068606481	0.0265589421976339
LOC101929634	31.1163906664626	-1.26583840566864	0.00175119755076773	0.0115076782838978	0.156242346663952	0.170019295625451	0.201457913080596	0.171767860234267	0.0917328538042677	0.140131254286853	0.188465583735394	0.18215886491192	0.0832597265554269	0.0598689781928843
LOC101929680	31.8871151504662	1.86547601448997	0.00208400200400071	0.0132194501427642	0.0722166660452567	0.052798960946185	0.134885717069256	0.250622599642409	0.211017415435164	0.270774454898034	0.0715334865349835	0.0459109639146212	0.479017308373163	0.441703796496933
LOC101929718	187.907803214379	0.657346632627978	0.00814719208072197	0.0390193279585079	1.85469755199492	2.40745133515995	2.01240836706352	1.49588638060547	2.51786342358896	3.0217831503814	2.6364960093799	2.7887743819432	3.3013506574731	2.77812614687324
LOC102606465	78.1700705893317	0.749266152015444	0.0020252931662442	0.0129089902703043	0.711056404137912	0.871541219600374	0.838803487523793	0.894480854587752	1.36395546425712	1.00818413717691	1.10734190262628	1.21938570479894	1.26109040460232	1.50364472749681
LOC102724571	117.201897421303	0.915163566661947	8.3710244700784e-05	0.000917395947026959	1.78090273696927	1.59139620515474	1.46726481609666	1.51131704024383	1.6255697558954	1.94418187904769	2.2146146957286	2.61866992079203	3.37509442963844	2.58290450705715
LOC102724890	35.8087822926059	1.120299758664	0.00126170202447525	0.00877066650023572	0.665548794273086	0.675826700111167	0.523413376214847	0.499402784498257	0.751964780251517	0.926884168354962	0.859026130665925	0.765637469076746	1.36006077955551	1.19076132045018
LOC105370943	26.6306471039587	-1.28150756601466	0.00348770824315543	0.0199842542348726	1.01681065791721	0.878574710144518	1.03592230709188	0.858348535856379	0.486184125162619	0.71298782181151	0.923952524262769	1.18371582390155	0.334441175300536	0.449997010635243
LOC105372028	8.28549042651426	2.1075800153892	0.00611646712020156	0.0310686878491113	0.205633896535646	0.085910173742945	0.207923745848059	0.0661285466761463	0.412020445053067	0.339877669295741	0.380924082380436	0.480230905838169	0.708561812077407	0.528027783013975
LOC105377621	66.3209714975639	0.873815717144102	0.0104818903722487	0.0471860374547107	1.52050964749073	1.24401520516546	0.811427394588943	1.07981183005906	1.59945691306762	1.95466635222477	1.38876499659847	1.53874508523394	2.35767930368524	1.89795887193013
LOC105377975	4.55666361085515	4.19636536161467	0.00421700796532737	0.0233006639473265	0.0512275857660934	0	0	0	0.143699741427375	0.263419145989474	0.129163912991067	0.0930496664842429	0.267717689587867	0.255777004908247
LOC254896	64.6466017349973	-0.815740018493438	0.00370106403313411	0.0209345241426519	1.03908202167937	1.0129231766372	0.922616245342447	1.21983456124927	0.501463078330501	0.876153447431549	0.8089137242277	0.474890707207575	0.552461248481949	0.635959328239233
LOC400710	8.88456192477311	2.21251139172509	0.00131811695554205	0.00910074756928242	0.0366620832382054	0.032165205187734	0.0518984706717524	0.0247588635889538	0.102841697548941	0.113112822074803	0.0396166417423686	0.0479469037663915	0.150330512430172	0.186713155777549
LOC644285	31.8347147184353	1.82423633928073	0.0106300895235007	0.0477686868127188	0.0824383575568408	0.101101807841717	0.0250965370260283	0.0179589608924862	0.1566531128257	0.198280080864344	0.0919555897627238	0.081149874076937	0.17639302494754	0.223066589320825
LOC646268	4.81329615962922	3.38447327956224	0.00257956356006092	0.0156522670254544	0.0166055088391488	0	0.0587664718804094	0.0186902239707431	0.0698707724784602	0.0426938815455994	0.0717749169195871	0.0904866217786889	0.300396265240002	0.198985320225626
LOC653160	51.7005912691681	0.838695053880473	0.00858022042836143	0.0405507447307379	0.286570426786901	0.44052296827596	0.442072108289566	0.330817954755072	0.566828338822343	0.453410379530372	0.484347561380388	0.584590570272388	0.620320144966548	0.704410142611118
LRP1	16229.8899480957	0.580942239050856	0.000287147562260496	0.0025929289069282	13.9438313684632	14.8724544436742	18.7198593609887	17.0246184490785	16.7460518124255	14.7549400792669	18.7710354240119	17.552332087584	22.5660184476191	25.3140756261743
LRP12	1878.01276200554	0.668398891452302	2.67412740606015e-05	0.000340845042376903	6.74398181712002	7.30557423475195	5.4482803531643	6.57881018082257	8.72295644181859	7.86623705553672	8.14694610125581	9.6808254024717	10.7450008839627	9.84642215829049
LRRC1	666.949872105418	0.543518320911985	0.000326381701582359	0.00288653791044326	2.87776601297325	3.64053816757997	2.8238398539893	3.22432811925466	2.88041160945401	3.06046659362488	3.69863708080711	4.14847014960278	4.72739963199971	4.3497533974321
LRRC37A	34.1113921450219	1.04805477773914	0.00811926688023151	0.03891812610039	0.024997540187966	0.0221924935327214	0.0242227393055451	0.0401940300446089	0.0338084382960291	0.0504981394625369	0.0202590491305286	0.0330811305427465	0.049527699645305	0.0655260799130085
LRRC58	4436.60622326315	-0.378354220437117	0.0014938575811209	0.0100945531553211	10.5160549921615	11.5716520108843	9.56534027777766	11.5031480566414	8.97823814630644	8.33118335326412	13.3097839275059	14.820172859834	8.43394217291147	8.04488092782557
LRRC7	25.6091325397116	2.55522370598617	0.000101837088723762	0.00108491539530634	0.0211231685372948	0.0334610147319227	0.0269946279151049	0.00396250781149436	0.00987551860175435	0.0181030296257842	0.0304339497919793	0.0383680737261421	0.108267741147184	0.139743800726563
LRRC70	55.6997013373398	0.856536778912924	0.00351755395362486	0.0201016452075456	0.345252820506269	0.342571115218644	0.254550191300573	0.402475565541614	0.553415455943221	0.523090220537568	0.393062614722483	0.56440477114782	0.609697118155712	0.600262797645945
LRRC75A	82.7944676140793	0.984061271780789	6.60873968384838e-05	0.00074910674622197	0.349222274398347	0.316456631481639	0.406160610312159	0.453962268633126	0.517400629828967	0.486875330609137	0.398625769074951	0.530690073737873	0.729625125256579	0.773591608317743
LVCAT1	24.0694861058807	2.29195564562774	1.08114626338913e-07	2.72810828048148e-06	0.0442362279071973	0.0790580684284598	0.0637799886826847	0.0719186037583895	0.172344603035313	0.132690041280058	0.100913599515176	0.182127982438637	0.326023832710554	0.294492630961357
LYST	1522.06668227	0.4026503022605	8.03282439824532e-05	0.000883713536872264	1.32913537373009	1.45278709155553	1.34016565094154	1.54729654627571	1.56201867977902	1.78854143432368	1.43893523865959	1.77545859293747	1.85978314478664	1.85808473790886
LZIC	1064.57219467022	-0.365254249974305	0.00254310167705211	0.0154802193476669	3.81527805300395	3.77313045637454	3.522305643679	3.95048371472759	3.32001161049141	3.57441672917278	3.53947385117034	4.27282089467416	3.10561592711664	2.70163854291807
MAGEA11	552.827593589575	-0.355535589132269	0.0101634179115794	0.0461665803311075	4.56639535196968	4.74019591388582	4.89993319068147	5.55924247026084	5.20027955286757	4.78348766673828	3.82667469923416	4.5413597762783	4.11027080542185	3.54959051189807
MAGEA3	166.091446017075	-0.741099654114886	0.000385647541112539	0.00333013434496376	1.76134940479754	1.68172653333927	2.13471595215234	2.10015672135288	1.48900938564886	1.26137636689391	1.56435180003102	1.59527284358554	1.24154496631289	1.03604523241025
MAGEA6	1230.59996824282	-0.420283381528129	0.00182326822304035	0.0118678186154263	11.4123358480477	12.4078149477297	13.9572015913953	14.1732803131329	10.6601177723226	10.5191652322135	11.3085681671821	13.2836995320014	10.1961489334346	9.05885962489933
MAGI2	263.721766807057	-0.478136473962311	0.00807207298472679	0.0387676082083692	0.687233947574861	0.695472825114399	0.672810617136635	0.864246279495984	0.531410555410304	0.689152473117229	0.555329730563339	0.579850898398087	0.486106359448453	0.555452481821678
MAMDC2	20.5130946207532	3.18678531332747	6.42584378840303e-08	1.73619024622512e-06	0.00706947648573553	0.0206745081611166	0.027798552016849	0.0106093385557923	0.0925435452382959	0.03029350024692	0.0254639937235959	0.017977372681728	0.147781620629061	0.144720055190438
MANSC1	136.835044635311	0.784169256705295	0.00134673178804663	0.0092605998582606	0.845095334478232	1.03271733451902	0.655121226215796	0.781335984671576	1.16836585585444	1.21831832851988	1.1284551179385	1.44073453126338	1.50695087695279	1.32010777039106
MAP1LC3C	25.4365066957656	-4.17447934500039	0.000215321092005562	0.00203861027274026	0.872416099875584	0.850453062220429	0.233274627612531	0.170203339934913	0.163149035289469	0.119628829163005	0.389658918721374	0.469057748297415	0.056114291157808	0
MAP2K6	14.5248791447676	2.28054048853847	0.00543480670132837	0.0284724236224502	0.0170007355190565	0.0058492033186686	0.00353912758890313	0.00450236913539719	0.0098183595416901	0.0527091610066208	0.00864508555757018	0.0152584004124468	0.0542728196484822	0.0224692673622968
MAP3K1	1157.61099138782	0.414521774689489	0.00190798129675676	0.0123027206767235	2.39246670821107	2.63726275865508	2.12107504174403	2.41440069392796	2.41570916669803	2.5226536233046	2.08258108359343	2.65568777857731	3.24155472798283	3.0886801565677
2002-03-01	198.513080250448	-0.554984856802645	0.00437949125967813	0.0240511770399166	1.20824307350354	1.36610256193511	1.2610583043725	1.12737711515135	1.22845357183946	1.39733602914144	1.00954547866812	1.19441168261678	0.92629480039507	0.746799255147073
MC1R	517.002658568561	0.586138305197315	0.00421322565757496	0.023287253039488	2.12525328923117	2.25711724625705	2.90292591277595	2.57335857210601	3.73384387830601	2.82411278242539	3.21513528497287	2.37469714831849	3.17282044331583	4.16856267205483
MCUB	190.901787843758	-0.825712810083309	0.0111943043837825	0.0497061825661289	2.05698459768467	2.35531440227126	3.49216145826232	4.25070560785162	2.0454842314534	2.33651817587367	1.99930326859015	2.50272927128388	1.69320689222014	1.69543614682038
MED27	428.977549218256	-0.478780965573257	0.00587187930316428	0.0301651342139238	3.73037817801757	4.32769515579803	5.04610936282726	5.08355391391013	3.37275035132267	3.97315337057275	4.02267688552725	4.30070489636744	3.28120441581682	3.18636443157294
MEGF9	378.170508957778	0.513754829569729	0.00803375356245967	0.0386267546774781	0.698861958559702	0.943545489527185	1.04303390187741	1.00021290373544	1.25264830959773	1.1997943217279	0.948200397010753	1.17045392393184	1.34368877999169	1.26086118921952
METTL7A	15.1579378790706	2.45864872842146	0.000972858114039934	0.0070927423978202	0.0572620644040265	0.0358846035457257	0.00964995162637991	0.0184145569505257	0.0803136017967748	0.131450557118641	0.0530372173697834	0.0624064075866002	0.128251778138849	0.208303585590174
METTL8	879.950443685966	-0.438457302583158	0.00199285422257536	0.0127305602084517	1.38696239495334	1.53772312920718	1.76272885358221	1.75282550789178	1.20405471647122	1.45190999798126	1.24218273370107	1.47940418178248	1.19547271232996	1.16131717496002
MFSD5	524.549920251275	-0.578581271620949	0.00388650306144575	0.0218539491517944	3.59154076331934	4.25441447046516	5.35134670797275	5.19037472043117	3.44014760042864	3.56333038202277	3.48882453790313	3.73008231627322	3.1844353785385	2.91479596586144
MGAT4A	354.441988753462	1.59609218029686	6.47280561977543e-05	0.000736126351887631	0.576444199385086	0.588123998570024	0.259324742326058	0.280419208852882	0.84047332030461	0.78081167802611	0.809417075420241	1.00978394142999	1.34915494674967	1.2244374145475
MGLL	1620.86675048888	-1.19965906233536	8.04625465164749e-07	1.64603380873703e-05	5.22446807731524	6.24391355498839	8.8432806856844	8.40515967359693	5.49168677039581	5.90820642528356	5.7545491133629	5.30732543122527	2.85133877881513	3.33411096703688
MILR1	98.0557258794725	-0.927072571186164	0.00588744643360095	0.0302180046341096	1.08205302936318	1.13415668596004	1.53626163598971	1.82145784228689	0.940135048656998	1.35408598755639	1.68662380306292	1.62800930288564	0.900773883751444	0.545045253000613
MIR181A1HG	85.0316512469656	0.819620766285197	0.00580378424047977	0.0299119560570692	2.27267282812622	2.28259349044169	1.38110938467287	1.78284313588471	2.70460043136821	2.89208636330828	3.05117667310687	3.07729420191399	3.40531991407003	3.36981969247992
MIR186	27.7104759940977	1.39885496563946	0.00137108659860753	0.00939972691841623	4.35315345091408	4.47931650073681	2.09213195434713	3.4479116662307	7.4623609908681	5.59612534561359	6.44618040183327	6.67707095125069	10.1110122765278	8.69403884590452
MIR196A1	14.7426038796038	-2.00301294240827	0.00192693754289167	0.0123877645855034	5.74431995057128	4.63424022933372	4.20600034458359	4.68190110467116	2.2225560007434	2.0371080623186	4.49490417208914	3.66987884613854	0.955546215144388	1.48350662846783
MIR34AHG	1050.8473076253	0.605519173430968	3.00246549880472e-08	8.81954993700176e-07	3.41886934753585	3.78963684859065	3.92685943485699	3.71668839196892	4.85131525420867	4.35219292241209	4.41524946741176	4.29309717429528	5.59547359686126	5.62069506816656
MIR4260	5.44578986709103	-5.36215227616171	0.0016903985786283	0.0111636468774592	2.27644177145645	0.60521794039806	3.17368185204898	2.3293040321747	0.290259179201564	1.3302011600961	2.23627073238266	1.3532476868992	0	0
MKNK2	1273.07184377772	-0.761829160930565	0.00192469419858005	0.0123820767535389	5.39238124818352	5.31912216547204	8.56078185503311	7.64030184672448	5.12259522100006	4.3090083022294	6.28613634987016	5.19811575160567	3.62716254850383	4.23612672139507
MKS1	668.961405025535	-0.482827121111538	1.36428205190985e-05	0.000189368520032462	4.87096014691406	5.16042338676544	4.96748532698	5.04658104909479	3.80990864407528	4.2142572866711	4.02572718271294	4.76759842695001	3.66411751853656	3.45606854987668
MLK4	215.679164628435	0.63706470642181	0.00896311035485079	0.0418993711473765	0.589568457657128	0.652674778382449	0.402651665512153	0.513136575998273	0.776689392582046	0.782457800662485	0.54164794636984	0.629527686790142	0.808899726798508	0.858079234231696
MLLT11	729.949424073911	-0.461149649376629	0.00264214959107312	0.0159419587686097	6.51516138972147	6.8302967235517	5.44211660278991	6.88472328027022	4.85733537465526	5.96359137335391	7.5887090826281	9.36226247642441	4.85854070698415	4.39827405418777
MMP2	5355.10456279064	0.445136802830246	0.00263017668878322	0.0158864520984362	17.6379575591891	18.0575519120392	22.1671720391669	22.1417744612277	17.2734476282316	16.2384532404573	19.1865413294558	20.673560100045	28.683764234675	25.367100006376
MMP7	8.62181404774651	3.17225833920541	0.000430093622016385	0.00365515766603836	0.061624888358619	0.0540661360088934	0	0.027744599138792	0.103719280034692	0.0316883476360671	0.213091753343485	0.268644725991841	0.386465358125064	0.258459821493063
MPPED2	78.8945355901026	0.681466422701695	0.00473173972542957	0.0255328881002843	0.15386988354212	0.165933313801743	0.145211090640823	0.164527897514684	0.175347305510169	0.18791467075071	0.122624194827419	0.12157766937833	0.280672646770459	0.218955618350642
MPZL3	18.8911738575895	-1.85503492535354	0.00154899711427046	0.0103935831361279	0.0974000995131209	0.132249078295713	0.0861741164427981	0.11745863283169	0.0536680920902038	0.0939083307704572	0.0639014642293991	0.0682395346379174	0.0419519788385017	0.0156315299537504
MRFAP1L1	509.722916766598	-0.474434089252913	0.00220602544195207	0.0138301135332012	5.66991552910096	6.27856588859558	5.70223036666221	6.74444715245761	5.85131145610288	5.39667289750546	4.98806367505705	5.37247265311886	4.86326206545691	3.8354982931995
MRPL12	908.532594956956	-0.45639616229074	0.000725320120757898	0.00554937709488144	16.898272958042	18.077531929082	16.7756565467874	16.0214809558862	16.2284907985316	12.5211900726997	14.643497335673	13.2056086674438	11.5983540596836	12.9525475285536
MRPL16	422.425388373447	-0.791919259866681	0.0026027220260187	0.0157593993287897	5.54858607746703	5.66047743747932	8.26136277496466	9.32155155075532	5.29784393578217	5.24787990673446	4.9056060761379	4.87089025711729	4.47053347694456	3.76022492291847
MRPL32	664.939480349453	-0.450726382379464	0.00605353248530244	0.030858469957709	13.01065818401	12.7967634135399	13.8995003913556	16.8485454551507	10.7919794598877	11.8897913110383	13.3368980292929	13.6374091915	11.1355413749169	9.38334573746135
MRPL45	1091.96195341653	-0.336895067488766	0.00182992829069045	0.0119044924603086	5.37546130271884	6.04676616433775	5.97186265934278	6.36152740517391	5.33804505750394	6.22034829879543	4.41581494911983	5.5127315839528	4.84988742481276	4.47662264132962
MRPL52	516.067087982937	-0.373662884658529	0.00968086820283554	0.0444089800313737	7.27201950929117	7.25428659752354	7.97825243752561	6.89637828363896	7.5380841424296	7.16803505873192	6.98749119514367	6.58518465375642	5.5228817939538	5.76389960693695
MRPS30	626.406358695616	-0.38779889662296	0.000617855994045033	0.0048842161898545	6.91621429455434	6.94824220987498	6.74027766544612	7.42981116291515	5.92028037578404	5.36233364789458	6.60435481425379	6.85068152181645	5.4006649121498	5.24196002451433
MRPS7	1304.54709411148	-0.350240916196345	0.00245859157652449	0.0150618316046335	15.7470098998358	17.7386598177588	17.8131628256864	17.2276313910397	14.9119371251291	17.4089959318641	16.1901259814471	18.0694429655643	14.228522086991	12.4467778750319
MSH4	22.7536214436391	1.41268656584745	0.00393462652906217	0.0220380124756859	0.105779675623202	0.0928050091699803	0.0598962514740822	0.047623854182394	0.201773088257907	0.146862001746344	0.0868713043125763	0.0783922853920347	0.204114235764746	0.20281079327238
MSRB3	1063.60253527756	0.696748253825437	0.00179823658499362	0.011736003599138	2.76361077776276	2.55498992498092	3.88409518890679	3.84305212835202	4.41796118879019	4.73695295245538	4.47306866103742	5.44731014528569	5.66958786246729	4.82060169327675
MTBP	651.649804248881	0.60321356597474	0.00992911040693896	0.0453571567366646	3.27438364529397	3.92097706478491	2.33136829379791	2.87152556684291	3.6223630964497	3.67811177918636	4.29056828433949	4.95876653479837	4.70731100317729	4.64899356132097
MTCH1	4015.236206223	-0.475076875993846	0.00900556711673243	0.0420442496067576	26.2231934646826	27.7147860954679	36.5767416156779	36.5313966088843	23.9035482707599	25.7196520196846	29.7421222511835	32.7128482109461	23.4761323135412	21.8295321568816
MTRNR2L10	649.006365706681	-0.514667984036349	0.00219160282429208	0.013754749062321	11.0702157834228	9.78471663051226	11.2497689858844	12.2651051835126	10.4262857885008	18.2858161258527	11.0668470249474	11.5794624032277	8.6817468342958	6.74393379007323
MUC19	189.502529275637	1.31842274134717	0.000112710423426412	0.00118314961280358	0.0603070672592502	0.0612383744210916	0.110664903754498	0.120672413796848	0.119044721557276	0.14141456334508	0.121283306967087	0.114410131584057	0.239069343223572	0.196558205777422
MYEF2	652.70469388386	0.573227890558847	0.00936243949528188	0.0432765868549493	1.56722320183647	1.66211006484102	1.0845904351521	1.29298004003058	1.67046431860865	1.85695464328447	1.85874592142398	2.01936677828131	2.13029129362936	2.01904993833841
MYO1A	48.9317375436565	1.33520347254448	0.000893531187931966	0.00661829307475125	0.147385771421881	0.237616910096322	0.124826030032159	0.102085605989014	0.243820874979346	0.242909451421201	0.277690091489109	0.33772793639612	0.387401197881515	0.373605921151344
MYO5C	47.0712402160771	0.785322049375621	0.00559866808776336	0.0290657137220923	0.0914433827256928	0.0930170081873435	0.0984917643415034	0.0917361745718124	0.103161649496871	0.171219297711008	0.146070959953196	0.142988321898883	0.163025089035387	0.157815328791847
NAA16	563.404614500421	0.711949509284085	0.00044966803877945	0.00379150911598924	1.92946827608024	1.96478363381622	1.36424299794674	1.70949205549477	2.50715158620445	2.23973199687087	1.92834521320026	2.5009934747716	2.99336504896603	2.68207143500435
NAALADL2	37.2968050165466	1.61690373269534	4.77789823559883e-06	7.65176172232342e-05	0.0875068396379006	0.0577864849443588	0.0865784544329322	0.0762524609881296	0.138570393979574	0.137894631661428	0.189117846545553	0.138437899565726	0.262133250184663	0.211411775229537
NANOS1	75.1400737538038	0.726830205462889	0.00691803419387987	0.0343383880957919	0.269234949139598	0.323023964205487	0.207664941085987	0.260299870560922	0.295317218171967	0.283988178964007	0.358070533997642	0.537941502289487	0.449584851038809	0.418794253592861
NAT10	1787.73601719747	-0.617180653794471	3.42791631283018e-07	7.67996270139162e-06	7.77859810183683	8.41898443048655	8.98179814573083	9.36920900761546	7.38720744493561	7.68830594789323	6.61091655434706	8.01745952848701	5.98782950581385	5.18584870916521
NBEAL1	2870.13493720968	0.551890369516685	5.62212726353471e-05	0.000649265019466267	4.65350227835012	5.37870907606691	4.23994882752974	4.6346927105194	5.64012230868713	5.99207307743444	5.76626037532301	6.76653723062911	6.83798914392352	6.92455953318835
NCBP2-AS2	340.977762055533	-0.470439961726411	0.00134362561582042	0.0092429393844108	4.76474244641947	4.82455724809769	4.56246382933502	4.45414507202121	4.94922157606232	4.71566352312429	3.80230331355732	3.42203360076774	3.31796421218361	3.35948661371221
NCKAP5	115.424101460323	1.54412191957791	0.000134953914389842	0.0013779251722371	0.115029337962	0.0934445661201904	0.189542636896343	0.244555452311416	0.266332099114629	0.258192850932532	0.171651594667613	0.208939019342811	0.537290273724854	0.391095637370635
NDUFS5	1302.16088269913	-0.463929515887087	0.000225063278071528	0.00211569330983651	43.3208934976352	44.597460700856	43.0257711840357	42.0633146531752	35.9316463780429	34.7753254596332	35.7388177605687	39.9350265290629	33.8834010352645	28.4438363720943
NEBL	106.123028942921	1.90545717170809	0.00252522639517373	0.0153986835964036	0.15645246691892	0.145024266697238	0.0296614974935373	0.0503125916278719	0.254700528999156	0.206512188969181	0.179627106077845	0.214657312414143	0.370627939583507	0.345244843014376
NEDD4L	2413.40372761001	-0.737848239335055	0.00251884252277688	0.0153662805880723	3.60631882634777	4.18422202449286	5.78289980448508	6.38661318149098	3.9993701374379	4.68216490311947	3.70155808279058	4.08826836038349	2.94911903701156	2.96854866019428
NEIL2	605.891802835911	-0.679749629644913	0.00135672459344804	0.00931812766339375	3.3214941190019	3.92819663205291	5.07764248554479	5.0829799948932	3.18820851251677	3.3044691850588	3.30051124231918	3.41115815514449	2.68671391281056	2.6952257830179
NEMP1	1883.95794996033	0.496309293160195	0.000703398879117919	0.00541946200847442	5.09993401344206	5.61283880366494	4.28354257394984	5.35122041872687	5.78192977761491	6.17850849682664	5.99373905090755	7.1776495020875	7.16276898498388	7.08449026206537
NEO1	2946.0019281518	0.355675311785556	0.000458604585128072	0.00385362405420087	6.33420039696274	6.92512601990323	6.16605769101858	6.79914908353298	6.1321756192915	7.21236270088674	5.84269898967946	6.97574235592527	8.73142487152429	7.92905828341922
NEURL4	849.243322924112	-0.369202793819423	0.00190087439111405	0.0122675286094238	2.94580510285706	3.00193699066152	3.25430525986674	2.99670554607832	2.82693526410345	2.42611047907714	2.78458172475672	2.48212810741449	2.31149337469139	2.38241955179045
NFATC3	1704.57559919995	0.560003241226328	0.000150558695486263	0.00150593749897319	3.86536799739062	4.46822434372349	3.41672620584691	3.80053172685694	3.92821870935989	5.05647685123795	4.78537946086017	5.81754785940952	5.8021059071296	5.58298678446838
NFE2L1	4846.4739566288	-0.374085845405669	0.0044647158790444	0.0243870558377301	16.5435054370456	16.9888992670496	20.3413702883414	20.1195123429836	16.3710804132011	18.4148448766461	14.5665638985136	15.4262768967954	14.5211583267114	13.8078599782714
NHP2	1201.14786817032	-0.419694819992853	0.000646261083744118	0.00505938517679222	26.7396386913645	26.763688077087	27.4209088506459	24.9372067435201	24.7594822943308	22.0875770121561	23.8006844594794	23.0832114720568	19.2901592318715	20.0629923399823
NIFK	1299.43227186841	-0.440912804950278	0.00278197816076097	0.0165991363592071	14.5756334764208	15.5269045658452	12.7427666749659	13.6218718369508	11.0664234703298	13.4044171908464	13.0950507046479	15.7372791513488	11.0550319453486	9.61974666446059
NISCH	1941.63236126132	0.527057835250679	1.9148908333533e-06	3.47838098100878e-05	4.2381721257724	4.17979191971293	4.4220755495245	4.17140493325433	5.03350241049598	4.75134501914804	4.8813933548658	4.61671880110358	5.8798018126225	6.30284695374721
NKTR	3637.97053668558	0.40651260664934	6.77181279276703e-05	0.000765067922622673	7.05242919157491	8.11602894176229	7.41448522353098	8.44862369522737	8.45062848064086	10.4770738537901	8.18915482096584	9.18844430518519	10.4839201624613	9.91523657843662
NLGN3	166.787954952094	0.595835620372349	0.0021067285563833	0.0133340786419487	0.612382830364194	0.574919074874996	0.545906360073515	0.732342540002933	0.653938998964024	0.836441171133954	0.770769849668151	0.754615282702928	0.914782637584904	0.938127152757577
NLRP3	134.539544796174	-2.93182537564285	0.000271864414279627	0.00246789122819921	0.178910966202442	0.202973536184667	1.30635012556403	1.24989573428373	0.324483287094073	0.309305061742479	0.243328145763817	0.208431252924704	0.0967238104317457	0.092409756612012
NME7	1670.93989786431	-0.526182849117764	0.00198416465042586	0.0126844811580796	20.6680534061743	20.7036452078709	16.1356319525692	17.7244708878366	14.7054986858823	16.6307970187526	15.7753001887657	19.5150189834408	12.7920802068536	13.191180561241
NOB1	1034.13853216933	-0.486364458576219	0.0039772304756916	0.0222331582609904	9.90511585843043	9.66336994299799	12.8641738238719	12.0014929725373	10.9014806656182	11.548394296947	8.59307501819108	8.86243816132943	7.71569922735603	8.02681558298878
NOP16	395.495133484017	-0.616886201717386	0.00034365068739335	0.00301955009643471	5.18023459229663	4.6297904525772	5.50552652181294	6.24471446223597	4.63097169498472	4.61799025649564	4.42584838173582	4.47428541543673	3.70174066236976	3.27780375172642
NOP2	2924.33460678477	-0.460390866402076	0.0095215644508599	0.0438655666283047	15.5540308624706	16.2756118084471	20.8066035160883	21.9514830950309	17.6011374664709	20.1506957355316	13.1032261843189	14.6094156800913	13.8780185792272	12.9867792608174
NOS2	7.92711933001801	-3.39621614437344	0.00405783239271404	0.0225882059722702	0.0395594861075301	0.0337431305333678	0.0466666704899114	0.0667888887970208	0.0138711590631275	0.0169516838281386	0.049872133784473	0.0287423030661741	0.00397576290181331	0.00493796785509978
NOS3	179.844180238934	-0.954994055151932	0.00958795875552618	0.0440769083079085	0.530481666331271	0.463039570054694	0.95783728323525	0.944361599614847	0.618762540710575	0.62976183753603	0.520588810353222	0.336264748276924	0.326411453543369	0.413516975493279
NOSTRIN	7.42563927726155	2.4312334385086	0.00520049118610235	0.0275393653442166	0.0213881003007547	0.0089355667709718	0.00720875628325868	0.00687806831889402	0.0257126906212051	0.0157114989381117	0.0264134224891385	0.0299694562656169	0.0405338577380553	0.0823807118496902
NPIPB4	248.052009920149	0.562696117294976	0.00135983388397576	0.0093320229481787	0.756803549921544	0.931368976690618	0.912967885778551	1.05224253031631	1.07106999171414	1.4351323160691	0.880700743358209	1.00020233250852	1.29266594059111	1.37981871148675
NPM3	1389.91467910871	-0.431563539765621	0.0108329111041185	0.0484878145598348	25.1066962491842	27.1178353214504	34.6716600051097	32.8676219700784	30.2021791777189	26.4423362650164	23.8668990057337	25.7597975215238	22.5566653580692	21.4795520733005
NR2C1	540.416977736958	0.331616341292794	0.00846128432130969	0.0401764879185923	1.78022923683238	2.00824744109804	1.74644326389798	2.04159670201485	2.16224839251674	2.33573111711911	1.89725347068106	2.36686493366405	2.38675756032922	2.34127651005049
NR2F6	329.187545832631	-0.491392498013969	0.00569406335846648	0.0294630487057778	3.42796981529236	3.06819327822088	3.99849811028872	3.40847937036296	2.72737436066835	2.5590887728545	3.73744803665949	2.78100901213837	2.50274715441088	2.41768818608394
NRSN2-AS1	85.4615379426592	0.875356850936137	0.00152700800993434	0.0102741212383366	0.905143177290334	0.93083734879013	0.833087107945976	0.62694036791388	0.990504243516383	1.09965840523296	0.698634077440924	0.791336015856525	1.41549708340973	1.59418431093602
NSFL1C	970.173729383994	-0.474526593466095	8.08839044872875e-06	0.000121601838557266	4.96197600654773	4.92404232537627	5.28594055617085	5.47575450966017	4.04291891433493	4.45866754826168	4.46891237404125	4.98494191994163	3.74304617012351	3.63778737881704
NT5DC1	398.795033873929	0.461601217902602	0.00281104727655662	0.0167377118504328	1.75037134959165	2.09292448835961	1.7511932829176	2.22947671651007	2.04480124229468	2.09635281580885	2.11169994661906	2.83487153925954	2.68814175736928	2.64840780652647
NUDT12	258.839989277693	0.808471399182023	0.00547768768644068	0.0286453393803398	1.22017278950066	1.2512448619201	0.686980056281986	0.90962650033611	1.51689447050737	1.39541902268824	1.12158561246415	1.41614148415699	1.84898192630439	1.6971315829672
NUP210L	19.6415934297328	1.69900788321283	0.000129355757871104	0.00133104751093236	0.033002107842511	0.031022306873515	0.0278080040916592	0.039798547302543	0.0595125076703648	0.0818202617685768	0.0636816300023963	0.0745030107572578	0.113716822611539	0.0988668137299203
NUP50-AS1	83.2545092384405	0.740864923527646	0.00295622026156267	0.0174362156234311	0.758132272791311	0.61438790919197	0.840461201926013	0.873872626036557	1.02489407148905	1.2446757100135	1.04624471287099	1.16470230759803	1.36596527461352	1.20400537962607
OPRK1	12.242052193148	2.52872754964067	2.41010783008779e-05	0.000313040763055393	0.0106740568750495	0.0156080069309738	0.0157396728317109	0.0210247034466885	0.0187137846482917	0.0240132541988095	0.0461370713070479	0.0523484959712738	0.0836746589474012	0.0959311445660494
OTUD3	1400.6981253255	0.62550918017458	0.00193311280375834	0.0124088944414581	2.5543014824727	2.67363433556414	3.45764996089118	3.90757379066557	3.97664878548731	4.1209689117598	2.86825580933127	3.45884208827574	5.03150678223097	4.5912639898544
OTUD4	1661.12030926481	-0.541456390064291	0.0101029154812117	0.0459290551691718	4.75988847128317	5.08915505410588	3.40818923088511	3.91103118913208	3.18105943609225	3.60138454520072	4.85930138951974	5.40704427314086	3.00520184423941	2.86364273856785
OTUD7A	43.6366602784296	2.01319709104677	0.00237351916732553	0.0146482166959431	0.0268382190194584	0.0249733603771503	0.00647589354480141	0.00686536029191031	0.0504748607858429	0.0219554581764938	0.0514110102385702	0.0465330199099452	0.0566425534447943	0.0749193036020181
PARP4	2965.65693609788	-0.446549503806306	0.00316587047376501	0.0184414638037892	8.65807708768585	9.62395015627312	10.7519146981416	12.0964093269343	7.65591092686135	8.90094048897071	9.34760348337183	10.7483679111519	7.70823005058193	7.24582721880285
PATZ1	821.498423888504	-0.552874679505252	0.00707180136755021	0.0349301048289689	2.67410053750474	2.85370875654165	4.02040583764777	3.62862724879364	2.44656491466512	2.56065794422651	2.44169938072796	2.4124067736526	2.29811145992272	2.15581199901907
PAX5	30.3032996204207	-1.15066815752596	0.0101906218712572	0.0462534723284956	0.0572191830900629	0.0927132323373562	0.0802691715698655	0.0556996190607023	0.0455492599973901	0.0377726093420106	0.051803862493406	0.0471911045546676	0.0354359933677793	0.0277971351307825
PBDC1	563.529892180748	-0.955510568713972	0.00112046355510945	0.00796279806906564	6.4896072500943	6.49595983440186	10.4314214532925	12.007615466318	6.29005336968381	6.76904343767015	5.97496140582119	6.72761835210732	4.47957738606502	4.55212992844925
PBX1	799.663575673215	1.04424950347773	0.00709378778609358	0.0350286348609862	1.8399086615546	2.14408296862735	0.91462753159374	0.972146156264714	1.68470581977254	1.80493440332553	2.44182104090023	2.87645998984093	3.24848338460103	2.7950872388603
PCDH11X	102.776884427836	1.4366382047049	4.26259218133108e-05	0.000507611809036682	0.161515367681867	0.180745284113886	0.0894338200771237	0.103881477816706	0.175680463627049	0.186446357777882	0.249331028999754	0.283796505676035	0.347837903706132	0.372772258716392
PCDHA1	13.3188055489419	-2.03061898684208	0.00602088200281031	0.0307193694585191	0.0347197993792971	0.0471422666863451	0.0848405244490618	0.05303530733247	0.0278266714455443	0.0350691559646155	0.0455573665566777	0.0270278408818477	0.0119635548309975	0.0148589467347878
PCDHB11	354.935176320604	0.974578077841078	0.0010067742815099	0.00729052223070633	1.73372985362333	1.74793454079501	1.115113716141	1.04010439296679	1.84901574962488	2.14702844538165	1.52990725922529	1.83404846753448	2.98553418489014	2.53978511752365
PCDHGB1	90.2233286595289	0.717479968820863	0.00480631123695808	0.0258826863979592	0.330562632612878	0.276834083920699	0.248150576608144	0.250296692490728	0.299255074872527	0.367001750498989	0.289009154252228	0.327509012506308	0.474770199007046	0.432126768240306
PCED1B	115.4476195823	1.02928078877045	2.86820980705561e-07	6.52812149992631e-06	0.618628222905056	0.574061289669717	0.631531583270809	0.709683279129333	0.784235225487536	0.841148223930352	0.719904572106369	0.764963264165956	1.33432129141784	1.23848301115333
PDCD2L	139.480483104087	-0.831303306225683	0.00105661723177913	0.00758117349097811	1.74967811804722	2.59349226317509	2.72846752402402	2.69772463536223	2.65573350996348	2.98875621070512	1.65758494389919	1.776259424233	1.40193578237476	1.31040948512889
PDE11A	47.6547552454924	-1.28945577422375	0.00443778644655198	0.0242904695294364	0.0736477215317511	0.0745549372952054	0.133660208430758	0.137093461015226	0.0496612998123206	0.0546211303737111	0.042852338038303	0.0648287196277553	0.0324534337625648	0.0530364984641208
PDE6A	32.5991524007517	2.03760987391203	0.00777660976227634	0.0376750104750371	0.0835573193802616	0.0790580684284598	0.0173945423680049	0.0138305007227672	0.0758316253355379	0.0758228807314615	0.087635494315811	0.128560928780214	0.222288976848105	0.176695578576814
PDK2	687.397147097086	0.424168800527398	0.00187140508526945	0.0121214568357596	2.97178393669254	3.25161902883675	3.39960228323506	2.91238541593636	3.45718192774834	3.38416979102751	3.8782683403049	3.70653690342516	4.16079528233568	4.19423011999013
PER3	1854.04227582495	0.893287574134559	0.0106513263838194	0.0478516059031509	5.00907280375042	5.20680764883643	2.58438428104829	2.68577581899656	6.12412324273114	7.22366302399071	5.3916326273415	6.08851973045829	7.3555062748137	7.00542215597808
PEX14	352.392726610059	-0.65691594355749	0.0029577844822103	0.0174362156234311	3.41428716605879	2.82733098491297	4.40078314955134	3.68921186060143	2.9135761984862	2.11604731978792	3.13019938025216	3.06298856520635	2.22787408118812	2.29332128879787
PEX5	3751.33421098493	-0.485408439333522	0.00480485079619693	0.0258826863979592	13.9491856903109	14.6008652715879	18.9468846189527	18.9099738565666	14.9879529982893	14.7705684857079	13.7601943161335	14.6207540778976	12.0888892254471	11.4270941829257
PFN1	6027.20302185689	-0.440289620941109	0.00400109417883536	0.022344752151156	73.9295501330818	73.8210703198352	95.1203154851981	91.157014670435	68.7425173306853	72.9441386930237	73.2137016552737	75.3127776479049	61.9144945043556	60.2227613894943
PGAP1	1131.95966891819	0.542818814725963	0.000543723926011628	0.00442184190467762	1.56758791292665	1.70556014869991	1.29562105036214	1.47589845503565	1.62206098553987	1.43578097712534	1.61497569081133	1.80422954314376	2.19366889853763	2.18114423388948
PGM5P2	2487.97558923327	-0.65301736655416	0.00323197109268576	0.0187565657739656	18.2390294576613	22.002065997534	29.1384253081066	29.9780956465422	18.6288400087665	18.9184015092734	16.7305256709606	18.5365882656198	15.6451310453724	15.6189475761913
PHF2	1111.52743060757	0.333596714487662	0.00243353597452612	0.0149493892811058	3.32058953957057	3.29384970497254	3.13128211607311	3.43111840162852	4.05744239058877	3.6289200689509	3.5741869032129	3.77993525705009	3.99528717549154	4.25554789815114
PHF3	4842.08138271093	0.379158205496354	0.010838087507235	0.0484878145598348	8.12971159815263	9.37731450899711	6.99788302793726	8.28201463056206	9.32027994477691	11.3946330533133	8.73793313199986	10.1073732494729	10.8035772920117	10.3710832881263
PI3	21.7998966284564	1.25820895022789	0.00996113555201106	0.0454602386421105	0.57564764847627	0.548956705866472	0.442870072383952	0.281702834216074	0.631863844976689	0.546967191822909	1.54157363302696	0.981959512876313	1.29792152869342	0.899744092355943
PI4K2B	419.339934376304	0.350154679850726	0.0112051944010087	0.0497285129690449	1.86363519640478	1.91431056404718	1.65792386071941	1.91991316242648	1.97119917449993	1.62357682278655	2.00134120778939	2.06463282194507	2.40080654860285	2.25512782122547
PID1	257.780893705096	1.28883851939025	0.000430512076023172	0.00365690534571536	0.618040304759406	0.648322125106643	1.34192302122266	1.28540566504215	1.84674590178049	1.61780989929776	1.56798982747296	1.70343403653983	2.45213652432887	2.25401007116043
PIGZ	10.8537739964053	1.69401370325365	0.00731723439576069	0.0357925863526193	0.0404982836967924	0.0518158477631782	0.0298588317026542	0.0341869376025641	0.113602716357823	0.0715851226718383	0.0218809987688409	0.0496536664963014	0.0915775397865652	0.159237294183842
PIP5K1A	2567.71055305466	-0.452727308065786	3.64927711794299e-06	6.10011459092728e-05	11.6153528412287	12.9219910806445	13.2167719161394	13.3645653906973	9.24873372551999	11.3604348971674	10.4936181958699	12.2977449655962	9.59937512088986	8.93376418172909
PKP2	1935.1327056792	0.706391678521694	1.27810740985878e-05	0.000178992623771697	5.01023253179221	5.97875974619634	6.71364025866926	7.19318890152225	6.78620599123133	6.69781305914394	6.67299357829859	7.3326574933513	10.4197374507916	9.7037842901987
PLAC1	27.4717081197402	1.51123624753727	7.12039774837038e-05	0.000797871727576879	0.225059137089523	0.214623863832057	0.207777010671031	0.176218343153937	0.205864837754108	0.352216990309144	0.232622657694569	0.277270932789744	0.554648385290233	0.615597669399497
PLAUR	979.96414471342	-0.610440088080202	0.00530540465474131	0.0279656667445014	7.65331470291651	7.82359302764196	11.4683748828775	11.1052552308709	8.60674035593696	8.0038289793112	6.91409095259195	7.07096029470692	6.1948949676504	6.1553353097641
PLCB1-IT1	21.097383743304	1.48847651727529	0.000482843229073985	0.00400636313298279	0.559096769382633	0.599523685582487	0.527634451829482	0.75514533946309	1.04555725841423	0.958316964800416	0.684707624780604	0.853055329510382	1.61826375145421	1.78658862783223
PLCB4	23.9165832464396	2.00813367474025	0.00671842626825163	0.0335246037872993	0.0490123714411074	0.0645009575927943	0.0231271375139116	0.00827483404855277	0.0549943160311198	0.0472552904169876	0.0953320078916043	0.138880491962908	0.183239244155472	0.106451695149866
PLEKHD1	14.9111636318269	2.03820951385585	0.000501236430170189	0.00413105362879834	0.0765209706439806	0.0895134702133997	0.0270805761700562	0.0861276877238991	0.214650827886366	0.147555426699402	0.124031572077515	0.108414158875019	0.258398259062224	0.309473237064482
PLEKHG4B	181.163513383908	1.40350385815306	9.15036533880881e-05	0.000989552410208248	0.126434041465252	0.109165233365764	0.245740648298872	0.220914714158749	0.287108297968372	0.342097934477515	0.266740586272478	0.257213035524103	0.471964315990769	0.449110213359867
PLEKHN1	78.2077886969605	-1.8410228098283	0.000631654700947566	0.00497511530250545	0.432588502024789	0.39950346804601	1.18176254892515	0.909729005012731	0.494965776027625	0.373177123485088	0.375190413926434	0.347385421541173	0.157884791295409	0.247251104744639
PLIN2	1677.45309934987	-1.45045532837667	0.000822790912797891	0.00616071418105401	9.3715064970531	10.2726946933008	24.3011125724153	26.4891163548363	8.12006279585232	9.75345590371322	8.74128170739929	9.75965929894691	6.56767226996286	6.13767280033403
PLIN4	26.2547496281875	1.75238861495504	0.000615615037867409	0.0048727447308676	0.0196427512869831	0.0319137431187392	0.0592166479071968	0.0491306060619251	0.0428558334788394	0.0252514182130631	0.0801861282601558	0.0570864756947875	0.115814667977519	0.150382223946684
PLPP3	236.107576049917	0.865680494233836	0.00639727949111295	0.0322472428205588	0.632921880889989	0.759998586582087	1.25592311780694	1.23133432922125	0.776013355761375	0.689710105742694	0.987393298584677	1.1054795443059	1.86530824797306	1.63239544365868
PLXNA4	205.379288311503	-2.37185275860219	0.00139867550602072	0.00955279805065981	0.0989628852112524	0.0855088285243172	0.561424693456507	0.52351909142551	0.0794954577867765	0.0659231537815599	0.152629975564062	0.167663279141839	0.0531651232472303	0.0673796158790218
PLXNB2	9494.361350351	0.658278469965234	0.000448055286671037	0.00377976536384639	20.9942910900666	20.7004598089299	24.5414568908944	20.2968604058856	30.075112070833	23.0328267930111	37.9932336861037	28.6601198156351	28.6822242369031	39.1022841054936
PNISR	2357.02151744752	0.525455133560797	0.00693868904606725	0.0343912410059474	4.53610002969629	4.61002061759679	3.32941569850294	3.72907434301032	5.15700458076272	6.21924657857348	4.25291047668457	4.66666353913662	6.13908342977215	5.471811390225
PNMA6A	111.221388238011	-0.831644578738887	0.0074444349231057	0.0362740424357934	0.766929580758055	0.783223216985725	1.32117072573985	1.07559039132773	0.828092364192696	0.712048856286736	0.901085559813013	0.796028051117175	0.535869310731763	0.565269426475013
POLG	1685.91070090817	-0.379122429955196	0.00892595916776197	0.0417825340067616	6.70523951064808	6.2173625378932	7.95769549607217	7.43125490084945	5.80185552239924	5.36984982704262	6.4944358841336	6.30202296036671	5.46248907049999	5.35102975430259
POLG2	512.302785546685	-0.352211306218291	0.00353486450509521	0.0201804357659655	5.99334900739957	6.01629916849276	5.71559854437872	6.14854431981072	5.40475702501983	5.77010219659252	4.42722681943536	5.4036521500084	4.6683288271248	4.62548804484639
POLH	1892.10284163812	0.531830460414586	5.02428069388862e-06	7.99418883738722e-05	3.33783164032285	3.61292519067989	3.2666669342938	3.28007653869813	4.00182938971228	4.41803259770862	3.89536987809437	4.55206224810533	5.14066143204461	4.55527534632955
POLN	230.620747337089	0.97315651183556	0.00344997086439125	0.0198087023285531	1.03906829572733	1.30764994186129	0.643013975693915	0.699792753155189	1.59473171275699	1.56568271681581	1.68881022845692	1.76824087343754	1.9053697180052	1.69673792518864
POLR1D	874.289489638122	-0.327624773535027	0.00345015398448321	0.0198087023285531	5.21107810085508	5.62592160291217	5.23738343128887	5.3278587626004	4.64933693201869	5.38282196599418	4.07815808990869	5.03875652248355	4.12514363574337	4.3463796849945
PORCN	241.981410078987	-0.661212645461969	0.00890657490724144	0.041703156186931	2.53527462474432	2.67528005699048	1.9347425399082	1.78715357906863	1.48467159804607	1.49519123801188	1.53925402060231	1.40288377469231	1.40269861459697	1.40940120781864
POU5F2	36.5617794050622	1.06460101158645	0.00993128885336279	0.0453571567366646	0.449695131265598	0.344436773801831	0.404180213293318	0.216922058903683	0.585673540736437	0.50927701557965	0.416516216718685	0.326730072152239	0.697290481321581	0.785857565350529
PPL	18.0726016361703	1.53016655153991	0.00536282938874205	0.0281819144391876	0.028895927933466	0.04875312841456	0.0157326078936011	0.0300218089430661	0.0124702564966366	0.0200020629716278	0.0744587097011668	0.0605613411231206	0.0750589364252565	0.0998834216025153
PPP1R18	2562.43967970498	-0.989723085725427	0.00211557934271056	0.0133753184051281	1.04781922417795	1.14866392930295	2.15587631877606	2.03214590436033	0.900346378840194	1.02162739952425	1.21818241390873	1.2376837662788	0.78421520374011	0.805022932204271
PPP2R1A	5077.99288002736	-0.609687155004096	0.000236444817888165	0.00220220474286733	34.1141283632901	34.3839291626905	45.0411396007918	44.3496145560055	31.2987086075194	27.4155042284836	34.2238552015981	32.2522234186348	25.5596235009477	25.74407277939
PPP2R5A	677.834058653089	-0.470300596025166	3.07848062989765e-05	0.000383060182072131	3.57704055487182	3.98371639040638	3.68324383518683	3.84788748670875	3.22888900693651	3.29874307016745	3.17209928396335	3.82759734964583	2.77640038646272	2.62730544333044
PPP3CA	2798.24759783718	0.849513929959993	0.00231997185061095	0.0143662689300536	9.45327896057259	10.5146262688382	5.69125296127536	6.80858158934214	11.64512874641	10.8068887662298	10.080530742367	12.1995356148054	14.9268334656163	14.2087955223611
PRDX6	3606.40292849132	-0.510664259530624	0.0010936100976406	0.00780099456947118	43.1909284906261	46.7170265034929	36.4352125658538	38.782214739292	33.2119071847614	35.4252482124611	34.6493411429307	42.1305711001576	30.0396265240002	27.5967765987915
PRELID1	2250.31450716735	-0.501290007553009	4.18162560019011e-06	6.83051847088089e-05	32.6653056105162	35.9786138778742	32.5848468696203	33.8852439206889	31.7757417231185	35.9294334400694	26.176137414837	30.3768493927636	25.1947436852485	22.2048195591721
PRKCH	1109.22832617502	0.785924065645856	2.67600306733097e-05	0.000340845042376903	3.17543790013713	3.65576722754435	4.58495201638977	4.58486688488523	5.49665161194215	5.39358663132023	4.30858690070721	4.96009684340182	7.22600881348826	6.44595159913537
PRKCQ-AS1	181.147373566154	-0.600209206412109	0.00117694697143632	0.00828879375293512	1.44010225125668	1.74581065008744	1.43021020742239	1.64860550808069	1.24297406166741	1.52692687094564	1.27684805598626	1.40179962713785	1.0762088419569	0.967933752262635
PRMT5	1658.06398522577	-0.493484802054533	0.000124432390672204	0.00128732462451003	11.8567839958341	13.3460272659568	11.085769256844	12.0865591718448	8.47476915421079	10.4181802327007	11.3059898518144	12.8873218969566	9.01942848526484	8.04246598047815
PRODH	11.4542535174726	2.29489973075949	0.00360913997268894	0.0204887549688427	0.0201534881986763	0	0.0237742267539447	0.0259241478663962	0.0201903706462882	0.0222068466095777	0.0342220002027828	0.0251017704934237	0.0798603304808174	0.0948754239136406
PRPF31	1193.93600203157	-0.410168719414557	0.00749659945072347	0.0364830260439626	1.05881607884146	0.979840359987103	1.09543969884635	0.96797894269732	0.864129365841027	0.725888884093486	1.09404141858453	0.921351114480148	0.703965735458526	0.831524833070656
PRR7-AS1	72.0967558401829	-0.722701942456218	0.0108094176889447	0.0484099644427484	0.736609993661618	0.849007292014654	0.950731327890249	1.04367378791628	0.595575553324208	0.623864344085071	0.702328776888929	0.802785997592806	0.470307902766379	0.610092100957397
PRRG1	322.968799718664	-0.448542649726542	0.00713345180550506	0.0351638656987375	0.876273137568184	1.13821108718657	0.926305066040104	1.08106930738194	0.724647382875341	0.789997996918531	1.08708012916579	1.06413871373779	0.749363434480026	0.709122012819819
PRUNE1	266.674136015457	-0.596438065686643	0.000161000684828124	0.00159460274817665	1.62807238300666	1.61119891203927	1.59693709699024	1.88814911021985	1.03450141455296	1.43962023703427	1.58432128889724	1.80864647871169	1.07936740001308	1.13175724623949
PSEN2	558.349159140841	-0.428466105339245	0.00597465737881281	0.0305288469811238	4.3322457416601	4.18200856204561	5.16039351821915	4.64522825006538	4.87453535411085	4.70826379285886	4.18585506017005	4.30059523821795	3.61656362324557	3.14518898776993
PSG11	9.30469965516704	-3.67334159178784	0.00324440675569632	0.0188096780330248	0.0689402107181568	0.113407836563092	0.22364617535594	0.174589227023163	0.145039390974554	0.055390601445891	0	0.0563502765831239	0.0207856541516803	0
PSG3	56.5709642448492	-2.52016951539424	0.000854875022960848	0.00636213616048472	0.196211319066358	0.340038591250902	1.20017480133121	1.11240138056477	0.132503011050609	0.354999177526695	0.321962038881298	0.388077581768874	0.113934362654795	0.130623225148111
PSG8	30.7666672873171	-2.11678557162577	0.000654329652492682	0.00511323362821021	0.22773157945759	0.180770163802612	0.399130331463691	0.541937559433233	0.228148345923331	0.393130310008692	0.175774447524212	0.269464149135411	0.0941645730550547	0.0584770327504918
PSMB7	1507.70268807479	-0.441262899578583	0.00717821437734009	0.0352934008183726	23.8105818640802	26.4870799314505	30.8762324146443	31.3203039415933	23.8541570769443	28.02779713328	23.6333056798513	27.3342700264112	22.6530352728196	18.4364065137865
PSMD13	1416.90969718149	-0.467672115928771	1.00142245218631e-05	0.000146579586187134	14.0161492822169	14.1439301244764	15.2022886142749	15.0725697886536	11.8141158752871	12.3669711763723	12.1848831881823	14.1268185512403	11.0391006831013	9.94480990679741
PSMD4	2363.02198179884	-0.422243776452243	7.26341662195181e-05	0.000811010729250292	30.441155358927	32.7137861890696	33.5065322576918	34.1940462751148	32.4218010284785	32.4406839571475	26.2780706803252	29.1677408919227	26.0107262347992	22.4629717850589
PTPA	3595.16989658832	-0.458002974532506	9.90646773278386e-05	0.00105603437667592	20.6978582266453	21.1368475852171	24.6751712151384	23.3632111815166	20.2293618854743	19.1230665787448	19.6497733473332	20.3210166826392	16.3197152284919	16.1621055034198
PTPN14	9697.05915364478	0.340966591852855	0.00144245165643821	0.00981278276493832	10.1152970341382	11.2542263696263	11.7525147866436	12.621594587018	11.333084688013	11.4018118718983	10.5102894549333	12.0728256408406	14.6832687392975	14.0499985055427
PTPN21	3085.05412135763	0.462863021972751	0.00701276490276341	0.0346883569628919	7.87093103444438	8.93200404619973	6.63214857231201	6.92052531213393	9.25901094999961	9.71108915789932	8.04960312716849	8.68988963822763	10.6197853492455	10.1823693897314
PTPRC	12.3540766043069	1.91031694242498	0.00862666573238091	0.0406807420266832	0.00366879517040641	0.0196703837569841	0.00577056553420849	0.0110117036624241	0.0240133277554301	0.0298702782995649	0.0185008109629117	0.0279887619137292	0.0339219749158243	0.0384680674518913
PWAR5	323.549206742074	0.717627757906791	0.0019922638664074	0.0127305602084517	1.42643437847589	1.71912039340463	1.10563898770554	1.18909831396431	2.1448027816246	1.83901394893571	1.48364264599049	1.65762477311153	2.32512468449379	2.11816422256184
PYGO2	1076.23101176071	-0.428850580349029	0.00621573191512013	0.0314533107148173	6.57525931449039	7.17906475778466	5.82770592817827	5.91372204520833	5.08811562434338	5.09517240586999	6.21465262367461	6.7477979523894	4.9798080661888	4.43465849377838
PYROXD2	295.947729112833	0.412877625080566	0.00893944228818983	0.0418342527996334	2.04123116887629	2.10111739211317	2.45548042715803	2.29749465023411	2.89120632300095	2.27879884937335	2.14768625494493	1.99776056828678	2.81805154974786	3.06758997750976
QDPR	457.93023938445	-0.374576714656826	0.00787475918131897	0.038011197126906	5.21742475849288	5.37227032030293	5.15536844010767	4.91887573207032	4.49418840440703	5.04655627053519	3.94289839656942	4.22347538821111	4.20833420825841	3.7065229132318
R3HDM2	1196.08027545344	0.447415350568819	2.35074589689451e-05	0.000306954540214553	3.8616171463155	4.33594371689653	3.84926679015651	4.24967777931187	4.63258019636908	5.50880561904399	3.80794774522791	4.0513046111704	5.68631442618578	5.33825918510431
RAB32	1217.60682696232	-0.375894067763041	0.00717449355255365	0.0352934008183726	18.9118066197325	20.8785171622433	16.6272497768829	18.7560030468354	17.4527634673761	18.0016156003278	15.8133380854308	19.1609350936178	14.8548313595027	13.9147768129241
RABEPK	310.758211389239	-0.463261459334479	0.00875265534291681	0.0411281458607281	3.09976151178871	3.25322828599186	3.9417210761372	3.90158425389263	3.23733179495302	3.58850541326406	2.8003108924674	3.34191456011485	2.73341345197553	2.37147093252671
RABGEF1	947.312634139312	-0.438364302122374	0.00649529492367231	0.0326455536614171	2.88983981268197	2.98301945720104	3.56301795235785	3.80002926408298	2.64587557869559	2.91539233027966	2.97613493887633	3.3252037802756	2.59304584873962	2.25059211237745
RAC2	7.91638568733737	-3.33636968944007	0.00907921020162417	0.0423039989437933	0.0917643936511535	0.053672537401284	0.19485110795556	0.175584202028259	0.012870526145933	0.082576352625423	0.0495797945299928	0.0300025132436288	0	0.0274905265367964
RALB	1849.09582466401	-0.676710462614344	0.000280366191957265	0.00254104042330888	13.2707466350339	14.2398867727979	17.5141500416871	19.5890245246303	11.8266815055038	12.826527931085	11.4377187100484	14.469655257494	10.6278630894929	9.39707294688913
RANBP17	742.660032008264	0.414218940836469	0.00187372699376051	0.0121292924937087	2.48768739118136	2.73373081710177	2.23045472818827	2.62606632473542	3.11089842324333	3.17852962520865	3.05161034993232	3.36833285703275	3.424075407087	3.24063204942405
RAP2B	2216.11904315264	0.612059957287726	0.00241773461347215	0.014875170640138	3.2748064855497	3.15942756631074	4.5241847678145	4.51142417946838	4.83121274974384	4.60607252055813	4.86195506549521	5.05984023094552	5.62106052389109	6.09519673358126
RASSF6	40.5248899974515	2.43115155667583	0.000252231373080908	0.00232155539101356	0.0815223902833275	0.0629138035380313	0.0133567434319075	0.0254880565336772	0.127044684020936	0.122266407464002	0.0954332095984956	0.120929613917199	0.275833404420661	0.220478692128978
RBFOX1	35.5585814483329	1.78370575468474	4.42867630812604e-05	0.000525568878997499	0.0802322980997276	0.0746573419375829	0.0372850577042401	0.0437842174731068	0.139810970588584	0.106266815454986	0.118224728355843	0.129835529723832	0.208182741069069	0.196656323184584
RBL1	1113.93915547169	0.935921994510227	0.0106851171169455	0.047965792198953	3.12245756068052	3.20820456862111	1.4320040083699	1.73572425302876	4.18080512299373	3.92443848095019	3.2404897133414	3.71901775950524	4.6522459210094	4.417809622519
RBM41	492.623559537493	0.485290503670356	0.00267785063694922	0.0160992749592056	0.952956435814978	1.00406672440722	0.796199686762378	0.863353346192934	1.03121068219055	1.18199756665817	1.06594941311773	1.35251213736531	1.2765238723876	1.23927187371464
RCC1L	786.033369118388	-0.53782708379636	0.00319611936693007	0.0185793031404263	3.5632267849816	3.81143605453756	4.91156930369204	4.62523004846936	3.66675178195271	3.28611705583517	3.58671589895754	3.62585959609449	2.71383132471524	3.06315111665761
RCCD1	549.540784116246	0.371013895559523	0.0104274241953668	0.0470309515704612	3.24716614480906	3.36325755711268	2.81970749519427	3.03440885955076	3.99911481340846	3.83292152130329	4.02868172995341	3.87202294125844	4.12159164356642	3.88810627742997
REEP2	158.965603451148	0.685480852846283	0.000900686776894614	0.00666267824974475	1.13201058160967	0.903687070316345	1.03221691304506	0.936655707907145	1.14143845801639	1.34511162323222	1.52739462158369	1.38708883234975	1.55708490707002	1.65896107525926
REEP5	1363.60459453611	-0.589196989527388	0.000122992926898984	0.0012731990697784	7.39113010328142	7.8015039804232	9.07070677650889	9.77149021738706	6.88396777990204	6.77292667702846	6.27017013308113	6.72150656294573	5.97829700392807	5.23893034007062
REV1	1749.93182843457	0.335284530847978	0.00894399852338272	0.0418441793154938	4.39214662166981	5.21018206946859	4.79830941525969	5.626487791315	5.70848279499419	6.3749046196545	5.00782888732664	5.99770032502043	6.6370281862271	5.88700739508684
RFPL4A	692.011803419845	-0.610952687558098	0.000573392635116158	0.00461088436864606	16.156172548204	16.2778964002547	12.7358637453158	14.1282037740077	10.3233809836292	14.507103533004	12.50784641132	16.2429465384935	10.2947476317731	9.01213938615482
RFX7	2005.26289167134	0.588588038626889	0.000163831943699598	0.00161891208771357	4.09897580906548	4.47764541963855	3.36908714189716	4.52030664912425	3.85703820212401	4.39238154298751	5.28934750850425	5.81137909257715	6.22167495677231	6.06474829322486
RGMA	299.357020562304	1.18697488585173	0.0046003918814848	0.0249851877659402	0.452401889008791	0.666568800109645	1.3606792314427	1.1466673523271	1.21576304274787	1.0432885312933	1.41060504528825	1.21567593159757	1.84921397052849	2.2243362150377
RGS14	53.8220416062073	-2.05280277890937	0.00156867625287084	0.0105092135397008	0.270857520528843	0.210669170857596	0.849785328694615	0.745938801658608	0.315231602349828	0.140760272385897	0.267776225269927	0.18213911441155	0.118152534914986	0.129483122185472
RHOT1	1467.32645593309	0.440364699796748	0.000408732556928295	0.00350482048815161	6.20212310015894	6.58440287079262	5.56986398790176	6.66561116239029	6.98276065793725	8.74716732983138	6.80141793121096	8.22236788422123	8.85367094779012	8.0031386634522
RING1	1004.74619467568	-0.359347549373733	0.00947148008045773	0.0437168717976324	1.894752572879	1.87232771060718	1.65166584302549	1.74351578664554	1.40428326140181	1.56060098128574	1.54312974070571	1.59836269833681	1.46726925297272	1.30852454628377
RN7SL1	776062.925807531	-0.33799213513022	0.00437463491723518	0.0240402067213845	47803.6728247794	50068.1803211923	49872.1372073741	44364.2229658443	42086.244238776	37350.0697344416	40037.3692321996	41736.6592303492	37058.9344808145	38486.934963782
RND2	16.0698983663917	-2.55963130532452	0.0112639497435906	0.0499637874016163	0.0200369940472389	0.0439482680708129	0.130002419128507	0.180420081104862	0.0187354190814111	0.0257582305567742	0.0577380112021727	0.0727902978662864	0.0161098832033013	0.0150065699411486
RNF135	199.407637667572	0.50712598920636	0.00390530502102684	0.0219238031627982	1.13048359387602	1.41558295293555	1.4293664834696	1.46924524155596	1.4979727099605	1.87079011804146	1.30257733515496	1.65407099027071	1.95843931482296	1.87108944131078
RNF139	1552.4180273558	-0.370168793795072	0.00045686339083053	0.00384087109003515	8.38550620803763	9.0110226681489	8.12400932096753	9.46181302151739	6.54117289168065	7.68528539814942	7.02554969731727	9.03847150458282	6.90188838520279	6.52796666766009
RNF144A-AS1	138.629177848705	0.550589235322264	0.0046201542074705	0.0250450252054173	0.803118221368715	0.794412986502054	0.919540109406406	1.01029098226862	0.811687295842192	1.31331870925672	1.18689973879696	1.14557296379613	1.31041687085389	1.25605246055965
RNF187	1438.89374579142	-0.583078664862891	0.00144963825437633	0.00984997380909563	7.57673380010854	7.66857299360102	10.462420263471	9.95757028219773	6.73488382765964	6.78738007836842	6.78133218004299	7.35546773108445	6.04726861818556	5.76072187741452
RNVU1-6	108.924904063933	-0.87075017002419	0.000402977922689023	0.00346238631174409	13.4428681770097	11.4972956909156	12.5667083466217	16.4627823395957	8.65644905777346	9.89053228427551	8.40510536244311	11.3334493777808	7.34139165293859	7.34516696534074
ROBO1	2636.00680959235	0.711037143083995	0.00506995759795486	0.0270062465478166	5.40338970163806	5.97389403059916	3.58973070796633	3.95639704368912	6.41435681647277	7.33878428158727	7.36729642178894	8.44784979144542	8.08483286702979	7.34449377030095
ROR1	227.683257261439	1.5750284710931	0.00122023455539694	0.00854462534634922	0.158210861258435	0.231341864483512	0.492715695318631	0.569834304539316	0.568065431499911	0.561343675319422	0.268978493993873	0.34944658561239	1.22877748113615	0.903690938747179
RPL7L1	2232.50009697897	-0.364986131265152	0.00493089913867404	0.0263882188723061	10.347937493824	11.6675741622966	9.82150768888612	10.5726765554235	9.30716576165462	10.5666540394681	9.12275298567812	11.2236403323051	8.80444960473747	7.5514345565354
RRM2	3595.80840392058	-0.600009880352568	0.000631733099980615	0.00497511530250545	21.1133435574037	23.6578705941652	17.3569301736941	19.2284251347929	16.3099624981752	17.4613499750576	18.4211661954575	21.2235396424138	14.4041496292805	12.2896903222635
RRM2B	4650.01080608771	0.477483693691261	0.000180227238823629	0.00174775669974336	11.8524214364738	13.3813686622011	13.5728889324944	15.8374308521472	12.7455038350323	12.5938329679591	16.9019922265865	21.4202193240057	18.8283950133138	18.8679219962209
RUFY2	1206.46445146304	0.337779679047091	0.00258216134054402	0.0156569726449924	2.83831872165834	3.23824799724113	2.78422279863501	3.1334980747564	3.51149913597076	3.62919741588225	3.41697260730915	3.51727739310438	3.84764612336353	3.67202769228277
RUVBL1	975.631074444432	-0.370438431236687	0.00218955732155572	0.0137469320473561	5.18452865104034	5.87675391401015	6.22132847533951	6.172168069282	5.04190944613086	5.8382336133841	5.60716977774298	5.86443650036537	4.43228803981226	4.56853152380336
S100A16	6231.10825773169	-0.822128215587872	0.00221015994908847	0.0138469353465577	54.6250453558949	56.7550379773641	93.7917878300916	93.3515825152806	50.5930857540449	51.7222219463915	56.4723898944533	60.6508413909421	41.889301737613	41.6488557185837
S100A4	91.8610591163833	-0.919653332917533	0.00101105222949927	0.00731533537335387	3.58932195493021	3.95430516022492	2.72611133445233	3.04378913424248	1.72405718142773	2.68634595983946	2.47060335699935	3.18836991951753	1.86788954290193	1.62028383534785
S1PR2	168.541769585259	-0.984128798356723	0.00655122496101657	0.0328689780233894	0.64221249447389	0.7014719097136	1.30068370031068	1.25408065303692	0.661991777565173	0.517234468948082	0.919716255449788	0.695691647073597	0.447912288348932	0.527340246838176
SAMD9L	265.385366090813	-1.04058876537242	2.77148108801805e-05	0.000350442465169258	0.78096949712338	0.977610949846343	0.601230424285922	0.726332666133471	0.483805865989916	0.635261686100402	0.636594860617331	0.975737919876026	0.40432091772881	0.339620385385089
SAP130	1794.40274734677	0.402332362914151	1.55211761118228e-05	0.000213105855526253	6.3086250261014	6.6449565989341	6.2812009433224	6.42318693888433	6.3514361596807	8.14270083591578	7.91477537575029	8.5065945260881	8.59530719249655	8.24753363543693
SAPCD2	393.098573744585	-0.412891058457978	0.00493406523890096	0.0263931951268328	2.01852458477032	1.84604893038454	1.95443619803678	1.87699487716619	1.61342605584882	1.24163676248156	1.87238811934142	1.29705360302283	1.40477509061796	1.47383074385743
SBF2	2690.89174125688	0.403736879057974	0.000532946037529623	0.00434241095728262	5.48920441573195	6.13231647499715	5.07476673739694	5.82798820127099	6.12517491735995	6.86007572874833	6.00206767613284	6.89645752342443	7.44501393060475	7.34554149119293
SBSPON	6.30532209432141	2.54491036931965	0.00539510388623169	0.0283269364429802	0.0146030541134168	0.021353134284713	0.00430665297701789	0.00410909347434716	0.0102408451850999	0	0.0710095445827669	0.0477449157568437	0.0660428861177994	0.0601527174260259
SCIN	11.622053140078	1.53379420532142	0.00842606463389991	0.0400313781224595	0.0420552013366372	0.0491957561500395	0.0248053806592568	0.0331344734937803	0.0353910191201178	0.0324380264700414	0.0363555084184745	0.0687500720520521	0.106509928439661	0.107089650462646
SCN2A	461.779738054034	1.4295750956011	1.09102930651244e-05	0.000157548299185797	0.334910583561421	0.445600022051319	0.717194778229325	0.728442887572599	0.696135685686004	0.835865931891961	0.648812918612947	0.813847958800492	1.46097412559205	1.50045453359123
SDHAF4	26.522026085958	1.20533590741318	0.00205007398860535	0.0130331007843856	0.58103466166698	0.617898697244496	0.716577836484611	0.505348055742283	0.96310760032214	1.08645763323659	0.713476852712563	0.518100542984264	1.27406162019252	1.50328671684741
SEMA3B	163.691027022841	0.638339049937913	0.00494810860332828	0.0264473711476184	0.728901449029404	0.788832471469227	0.709258547365678	0.59329110127503	0.953019075162841	0.725269762311975	1.17033936962622	0.893122037888675	0.968459001835529	1.21518006573041
SEMA3D	53.3674349588381	2.33674823486538	0.00290512909855574	0.0171906812774042	0.0221565993619196	0.0129592847576446	0.109776295347074	0.107234338713572	0.0466140100827055	0.102538996425433	0.0598554406638056	0.0869296213060846	0.400816365412915	0.228997667481612
SENP8	83.1006473083795	1.05638755113163	0.000114359665621429	0.00119800248583673	0.332291064678828	0.503557149102438	0.527404545750254	0.482810426189763	0.686377588464874	0.761141683415337	0.54839789463397	0.744040540124461	1.04194091651365	0.850673081944955
SERAC1	542.029490040571	0.569555386574995	0.00305822546300218	0.0179094408850518	2.0796782652865	2.07146322357377	1.50708744171962	1.83839519311013	2.16837893004648	2.1995017362858	2.21582244390368	2.8022991230342	2.88257556038134	2.65003353412799
SERINC2	554.644146210061	-0.865974131277929	0.000530479676167881	0.00433052862483082	2.72701851696848	2.44508730048673	4.02810026426261	3.49152763887377	2.26310559247294	2.22997036407657	2.3346313582843	2.06082070023327	1.55959466081259	1.89607947780504
SERPINH1	4063.06995598196	0.472586487203533	0.000362226526556406	0.00315164588979508	25.3644852989851	24.6618484618153	30.1117797658083	26.7460327473743	30.7804846137437	30.3864960696608	33.4082460951396	31.4666057149764	36.0965820238165	37.572363135997
SESN1	734.085897400298	0.509113997588715	0.00671896737915845	0.0335246037872993	2.41721969828596	2.83657364629419	3.27944211205942	3.72213931574885	3.14392819025566	3.05341796451913	3.52808507035364	4.19503056010393	4.29219464858303	4.34143250732559
SF3A1	3011.33031023871	-0.374944776889704	3.91733517645518e-05	0.000473053321659914	10.1747567469806	11.0342539390112	10.908685837649	11.6220631478972	8.53067381969176	10.0508685750213	9.80611021015753	10.6686770861941	8.74632278396307	7.99184029716699
SF3A3	1922.73029425897	-0.357715671987733	0.00540915953715416	0.0283819839653304	12.5940607946758	13.5827683305507	11.4044391562388	12.4708671356484	10.9999796466614	12.2283525616955	10.4833898494997	11.8584032224872	10.2895972379829	9.11601062981495
SFXN4	709.713729993843	-0.500112618610922	0.00327763176563172	0.0189766928101804	9.63884312448182	9.99632335750912	8.10787784560771	8.12894691467093	6.79175703010471	8.32764105992568	7.84399005069676	9.51338803524784	6.39405427927135	6.22109340287903
SH3BGRL3	2618.43348957865	-0.683003437025565	0.00859297934790107	0.0405887182832139	35.7023652533264	34.8581107833123	56.3021451208683	58.9821562184881	33.6099303744706	37.9514145511328	37.9614477911863	36.904015133868	29.8297532588684	27.474808859068
SH3GL2	124.73985877895	0.702936616805832	0.000295393329582753	0.00264644345603712	0.578367503255975	0.660247818988956	0.652351559726243	0.71379148442968	0.505218776239238	0.560894188399102	0.805892076225276	1.08924967797186	1.00956446989734	1.09431004866123
SH3KBP1	1520.12910586694	0.335404791800516	0.00740950404004933	0.0361615783652962	4.82780942218006	5.04871326246296	4.28588560349425	4.84005680707658	5.18775332291028	6.29416989779384	5.15484212690297	6.16427622571726	6.26417816513228	5.64680184723975
SHQ1	502.479559486823	-0.423629146923117	0.0034083237640687	0.0195983970494792	3.47126850945627	3.26048415011497	3.04390240293483	3.51252177913648	2.94988120885184	2.76633266538525	3.01448980642214	3.62394472145331	2.6245647008311	2.29714333972723
SHROOM3	1126.49630406922	0.717608164075777	0.000434517598736743	0.00368364598751465	1.13250203218263	1.3137496974663	1.52300039703136	1.85536813598306	1.8849066001404	1.908806674239	1.41821249704721	1.6607444349448	2.31732314494926	2.42013931875286
SIAH1	643.32823028696	-0.377267051515771	0.0071887825748023	0.0353038875263061	4.65888598313909	4.55513150295192	4.55916737391787	5.48753059658427	4.33029032583766	4.73992704928757	3.94826718092999	4.15151316147784	3.93105666602753	3.42685872366939
SIAH2	550.385667355959	-0.375966086628588	0.0032427991514927	0.0188067028752111	4.00620576705412	3.71446735938962	3.90811991305456	4.044543066249	3.58514400692435	3.6329722981617	3.49984905002361	3.558645428036	3.13379040214815	2.86962274544847
SIGLEC9	21.6525235442827	-2.20498984150761	0.0105848478013811	0.0475778249068617	0.0823699002813225	0.110407332196379	0.36438121797135	0.455828655405278	0.0673918589334323	0.0882410670558799	0.148346672346176	0.104731545405235	0.0662259753070368	0.0411269164327717
SIGMAR1	1106.4625514658	-0.364822417968561	0.00127413589883961	0.00884279131084808	11.3067809869058	12.0900485798434	12.4891744180446	11.6282511096408	8.7367343368323	11.2663588913699	13.6609832681141	11.8432585193419	8.93964733286035	9.39040873936733
SKOR1	17.4593635857311	1.3502552533105	0.00620415514211181	0.0314119628644813	0.0850976594135131	0.0699935592750346	0.0690154768215779	0.0778221638674403	0.171572456904338	0.150419371690192	0.114944487203405	0.081149874076937	0.147528711774306	0.238999917129456
SLC12A4	3541.64939710867	0.516104412948181	0.00499074126882973	0.0266503722695991	8.96877541029066	9.21361828325054	12.8061059702386	11.5572595248614	12.9236369124007	12.2425087589203	12.4729268178943	11.3499857809053	15.1183913705296	15.0582121285147
SLC20A1	8326.4797566218	-0.554493895528067	0.00445900989529812	0.0243636330813364	39.1291580879387	40.3935034499372	53.0029665375987	58.252258833659	34.1725389246666	38.4996533335294	45.4015935179037	49.3387080601761	33.7164637640117	30.6339506158057
SLC25A19	337.383005136094	-0.83812923287193	4.62003155017866e-06	7.41968431385702e-05	3.20221706251485	3.89809973101072	4.37248111264928	4.30706067750734	3.11023100854608	3.54023976188163	3.42567754454831	3.68184421664626	2.30748963328026	2.06251960817006
SLC25A44	919.904393821688	-0.463808650237252	0.000662314552346135	0.00516388986729401	4.09368783088342	4.23628818035164	4.91469967042739	5.03614536538024	3.62095289870068	3.95741802247628	4.60774695465205	5.30316913004945	3.39338849415816	3.18271139643047
SLC26A7	133.467654404938	0.868863674446037	0.00222662640715073	0.0139186424810761	0.322510160717196	0.399823313229428	0.217794837776909	0.276195076122519	0.458896190950727	0.453653973931982	0.361127758081211	0.382047846882885	0.555241121980495	0.546094467651062
SLC27A5	59.0355115732536	-1.04186632688512	0.00379458531332145	0.0213790668931527	0.615597457705021	0.591526963733665	0.491045847136021	0.369536944131902	0.444041315159094	0.339159111855369	0.525830932041436	0.613395991693844	0.254542966402099	0.245892007762956
SLC29A3	140.359156076595	-0.734281494399829	0.00125446162011294	0.00872739614575736	1.02482216452081	1.11498025755252	1.38164551574531	1.4006567317098	0.778579065372606	0.933189076062139	0.791008213302093	0.983927560000913	0.779823242011808	0.685297826612946
SLC2A10	162.895381493527	1.11061263903831	1.23228157406284e-05	0.000173285814801111	0.360145451446475	0.416507128049621	0.606374705325641	0.534337394866051	0.753097487855202	0.576619430862909	0.555450574591102	0.528091462545945	1.06610528135944	0.98573498288276
SLC35G1	306.864564893372	-0.675274914581268	0.00118804784351975	0.00835327910926488	0.923647187653143	1.17539694740465	0.832609651873578	0.865520340376496	0.742452426799789	0.736511379168998	0.936879738408735	0.914035718344195	0.614762254676555	0.564501658153825
SLC38A2	16229.4219536882	-0.41502107622509	0.00169803046270849	0.0112054360488413	55.6043487434849	58.4042128001475	63.4005081971953	73.0149059798907	52.6639741146666	56.7806333524952	47.3419063497677	54.9964681108527	48.4782207317802	44.6424930792741
SLC44A1	1929.3432249728	0.62432571075073	9.54584159720851e-07	1.89199241068548e-05	2.59947794121432	2.8385474834658	2.32494444911486	2.70834611158359	3.2285805710353	3.08338750513989	2.99270530471685	3.65989130780063	4.20071041440287	3.8146131979499
SLC45A3	355.159301665769	-0.770655543570051	0.00621824434703418	0.0314554933351296	1.7424245858347	1.5466879535365	2.86797874866392	2.2472756140103	1.39156189579366	1.3123445271368	1.77651938991499	1.36278417513232	1.21138509681596	1.23435471688601
SLC6A16	683.075612635485	0.546362538528622	1.06746949630385e-05	0.000154796589236163	3.64486106648873	3.3180717632461	3.45202096698123	3.48522016542744	3.42798762644492	4.02924416860749	3.35112755641605	3.91048440856262	5.10840936019912	4.99222994305405
SLC7A9	20.1124857050655	1.28057068908235	0.00796482732548392	0.0383597513343934	0.108749802985798	0.147659615150339	0.183267988870745	0.0874304594709833	0.152528352992194	0.289588891211958	0.201452287824724	0.228573768963646	0.318515405048129	0.314154344852012
SLC9A6	810.835347826194	1.0024121726531	0.00231389046437776	0.0143337756812788	2.67052039985369	3.01335837322294	1.49042788813821	1.64971850058885	3.79902014080558	3.59508658566691	3.95957027139636	4.74423462325707	4.62419722297147	4.18894598939036
SLCO1A2	140.623969866115	0.630960498725904	0.000573527246679554	0.00461088436864606	0.253671246705534	0.257588629187334	0.274308242521438	0.255776581756905	0.284137590617208	0.312515307489481	0.276017915958551	0.299499106921408	0.420654000187436	0.379970697877164
SLF1	715.355488288097	0.803062740107609	0.000208786907388661	0.00198769762690678	2.66184608252414	3.24886006111663	2.03332300948922	2.41482791481422	3.85581115785932	3.20685579440529	3.3596844716638	4.16520860076846	4.61358663016213	4.36298015516347
SLFN12	1408.94603016156	0.376456210505165	0.0105585151096872	0.0474718795512465	7.51177038504152	9.05926154752871	6.86489706491635	8.12621188640878	7.17650800025907	6.76218821007882	7.07442091324523	8.92546215571125	10.5214095655754	9.80639178175633
SLFN13	127.696197788917	0.839403692340795	0.00525296322986063	0.0277573555171971	0.261954892066393	0.232218171841244	0.169959473915554	0.154791865545864	0.328370905175367	0.305181350108244	0.175146815065464	0.287272853909979	0.373180907614838	0.358045524688659
SLIT2	410.633073878594	1.41482040778461	0.000371291151952712	0.00321748217607433	0.71348096100261	0.819539383395811	0.332609244029893	0.381208728092671	0.810206403246819	0.86416068917638	0.748686249783809	0.85252646693784	1.49078242430927	1.49619874965373
SMC2	3128.44413046445	0.701024768642368	0.00618924852751155	0.0313457255221805	8.13008348559781	8.81471110287851	5.08354856462634	6.23510321717317	9.64651041989323	9.53762677510555	9.04212998004388	10.7002153808	12.0027221802303	10.8757519273675
SMC5	2115.2230206254	0.594948419261897	2.01291212338261e-08	6.14385114177739e-07	4.99533514561631	5.14602660839048	4.93030831116038	5.84223814849438	6.28901376321	5.98240410421895	6.2343404052111	6.45997114575937	8.0400443483817	7.63564467849446
SMG1P2	138.565137750638	0.4963906982236	0.00882101096703885	0.041340437259976	0.711306248271481	0.769388091482847	0.781625737495818	0.690934105397711	0.895152781395686	1.16493091054937	0.715983798786746	0.807066903454055	1.08111694053582	0.985181843922771
SMIM10L2A	40.9252016832119	1.60926898427678	0.00245121615701605	0.0150430258559074	0.103198167050932	0.127684815479018	0.0437010213919838	0.044674628861366	0.0927832299928662	0.0680331891041517	0.148686397550023	0.132656150477841	0.261681072277137	0.22195977036618
SMUG1	484.979458773935	-0.655724612287586	4.42312365127243e-07	9.65780899916969e-06	2.97349788624659	3.27273055638852	3.2908510043339	3.08298868454757	2.57192530248439	2.5936497661191	2.61718539243286	2.94511909585023	2.03413840462872	1.94129405674213
SMYD5	1536.01396995736	-0.365255729347921	0.000602274438834577	0.00478699535473329	10.34923621792	10.9785638467611	11.775271708768	11.4965264107689	9.68201498960385	10.6656534310721	9.62484999321516	10.4313062186353	8.98313947681027	8.20407483355254
SNAP91	98.2475198169755	0.940091701228571	0.000466394284178566	0.00389641996236638	0.285106656667635	0.225658037954493	0.206733966506288	0.256131167771106	0.249466293235677	0.282451315941175	0.390050163961707	0.387687635132538	0.40062280006761	0.532842222335929
SNORA71C	65.9695653174877	-1.1315301212072	0.000186000956580909	0.00179564069544177	9.04278253088432	9.69664395811675	12.3267642949149	9.16024129174791	6.623377936998	9.42900561453627	7.70865208256834	4.27057512785943	4.60462487732622	4.51502017359776
SNORD116-14	15.613621808302	1.53364105725105	0.00394156879959981	0.0220697029170163	1.91758296222299	1.29413623425543	2.43609949036165	1.32819889494217	2.48264234125593	3.03399073111281	1.4345438847093	1.92909776643077	5.69261574979636	4.41895591458504
SNORD18C	52.8610120572949	0.777978485542304	0.00573268528097906	0.0296182994192255	10.9683103533811	9.07826910597091	11.2299511687887	12.5782417737434	14.5129589600782	10.6416092807688	6.03793097743318	12.4047704632427	19.2178884314487	18.2892011211109
SORBS2	25.6954828396498	1.19103218280683	0.00385603602568954	0.021703938115116	0.0277960572282445	0.0270962926873839	0.0418981361125316	0.041714231915992	0.0606444169932212	0.0357327675481879	0.0450541681131555	0.0656353009961689	0.0875305448219467	0.0693922245190434
SOX6	323.187623330169	1.25314116607477	6.05798752256596e-06	9.40383537378261e-05	0.272484286878867	0.359459250940256	0.454206310129833	0.551713932730305	0.523415142757578	0.578736243273253	0.380856275751083	0.432534363380006	1.00371643981043	0.924993239025443
SP100	1234.94933368273	-0.373455556136442	0.000610105257947623	0.0048375302762377	2.71401713145814	3.04334094558428	3.09040079363254	3.21595020090731	2.50466194186809	2.99020454819615	2.36852298816936	2.87090340758638	2.40510782446777	2.21323360758603
SP140	416.164217149586	-0.959122269624016	0.00648680365127762	0.0326180989089256	1.60197059754458	1.61470652971036	3.13739790145607	3.29544917911514	1.73422940888068	2.98911047001741	1.26469074200676	1.19923954904168	1.2004618743261	1.25220273462933
SP4	734.606988186671	0.614990005670574	0.00165327325722898	0.0109563623803405	1.80855650617686	2.07854930870064	1.47742725618161	1.5298366623638	1.97500113093494	2.22486974718977	2.06488191016877	2.49228000649418	2.68282669100382	2.56573102115887
SP6	114.839477257428	-1.43797342488645	2.61755882164025e-10	1.16528836246285e-08	0.568262290192184	0.65971160741105	0.654104209905849	0.60859287417898	0.656940298282327	0.504723122742872	0.491246357605371	0.495451338919379	0.224289908919883	0.23214336212984
SPAST	876.655719496819	0.547014292860762	0.00766684143432633	0.0372166675727298	2.86461750844089	2.83139365632609	2.01438343761948	2.31715036448333	3.27542422323253	3.06025369519135	3.0322424077972	3.64374854347988	3.59269246438327	3.69724115040363
SPATA6	492.400550573566	0.523576106432587	0.00851900657651003	0.040358824617504	1.38157634593929	1.19835085802459	1.52853846388621	1.81679202876949	1.63485236975609	1.74047047157462	1.68738415405902	1.77726349401301	2.2872624309192	1.94088167526383
SPRYD3	959.708941146525	-0.866252727241304	4.54618617402534e-05	0.000536549884714639	5.53299858813317	5.43519563049841	7.97750179045053	7.67009946774799	5.2863403513589	5.15530075798227	4.62981261927327	4.61274997413088	3.71854785634293	3.52054540275552
SPTBN2	1565.56256936912	-0.67710825093993	0.0072385229398123	0.0354883817967859	3.21656537209329	3.24468977541614	5.03777889669098	4.19567850361404	3.27542374902997	3.2128407630886	3.10630426875022	2.44331131876398	2.04057155388658	2.8221889159336
SPTBN5	2236.84848827948	0.802111198883105	0.0104883578257224	0.0471934906722215	3.38153630119344	3.22549721668684	2.10824237466048	1.76524804935993	3.20003131430075	1.94470575811849	5.47404662317888	4.22543115361431	4.27786865446689	4.84370039334939
SRCAP	3940.02869652631	-0.40383845937224	8.85265334655446e-06	0.00013159515147681	6.72760918404267	7.10411683046014	7.36627868891252	7.02985469156595	5.39565044003273	6.2371118172121	6.22122660696827	6.29034934595178	5.30846337537847	5.28844476739851
SRGAP2C	683.548557244221	0.347485016444281	0.0110801513586843	0.0493012224100547	1.28909648137131	1.58794046455195	1.55295030800468	1.66857441820229	1.50395878131724	1.83293812481477	1.89741224149323	1.87533810430105	1.8985743576013	1.94554820552691
SRRD	1818.21781287565	-0.39088140592156	0.00106291666339313	0.00761683066878544	25.5864820690832	28.2247809791207	24.5792776001896	26.9278715249326	20.6806859117897	24.5658217027864	23.8708496893623	29.1590164450251	21.3907851487659	18.488187015569
SRSF9	1883.75640929198	-0.355236159491183	0.00417813565607299	0.0231305035805278	32.0112946514624	30.4034849095583	27.5799019442528	30.3135987258588	25.5006290927943	24.1851844973896	28.6519543672292	31.4179198572358	23.796222920137	22.9656520541143
SRXN1	858.831868055438	-0.658019474724451	0.0025400639538939	0.0154674536843865	6.96116022273356	7.46450464607723	5.01223296300941	5.59483409557827	3.912616016556	4.74618148398141	7.57230044610034	8.4463490342405	4.05458620855243	3.83869063625109
SS18	1886.95613674068	0.3306905235311	0.00387665221617742	0.0218056928585246	8.55006355768193	8.90655254868259	7.68643870354855	8.5181299843277	8.66878046664321	10.1447466214749	9.3528032286022	10.6390446660449	10.6686546926956	10.3611972224356
SSBP2	466.258688889117	0.818360535677268	0.00145620420772879	0.00988676930288877	0.761085821794322	0.924034510132035	0.520554858940664	0.633390923452962	0.99846196473849	1.07327674441021	0.765931405090965	0.879731045070587	1.28317417003754	1.2045060471991
STAG2	2597.9996379825	0.351037056014043	0.000465520575568034	0.00389459862247376	5.86807124622302	6.2766292711187	5.87543196367664	6.82910071857012	6.76788311619926	7.25771761421839	7.02789273892992	8.39819631100798	8.13710712487913	7.58925088644235
STK10	1543.09592737787	-0.773680336420779	0.00297545439794479	0.0175043506930104	3.91157810224463	3.92763215980871	6.50842662835686	6.22801487147373	3.17606908147436	3.64252791505299	3.52482932252214	3.36168548858581	3.03380763771544	2.9260991349344
STK36	1107.73461870098	-0.50956655133211	0.000533954154800761	0.00434856312611198	3.69187401078535	4.03441835567882	4.61698855792351	4.86690023646667	2.99493361802302	3.70580296443064	3.64632212811825	4.23176684636084	2.93779634230562	3.05539237522737
STPG3-AS1	63.5703526894665	1.35437278837316	5.73348733535169e-05	0.000660793067543148	0.33420905062214	0.4290963175309	0.596186605770879	0.339467648192892	0.834601790402614	0.649694958146878	0.581351509617644	0.550792758316605	1.15019451822936	1.00121435007706
SUOX	165.195080627869	-0.660578913666907	0.00650193812466413	0.0326693873491896	1.50370234286923	1.44937651364215	1.0297658574495	1.28045494603787	0.82939615178026	1.13666823745336	1.13194174926697	1.19073337627375	0.862591983411212	0.792971049172896
SWT1	345.384437627388	0.492482711797596	0.00836634317442858	0.0398492486318643	1.15986006606526	1.1563574716731	1.37653074226338	1.6338193124032	1.52325368492014	1.82991170997251	1.39005908490463	1.51687231215925	1.89474278021977	1.82157315799701
SYMPK	2730.84996276715	-0.334994789809629	0.0107795148093947	0.048288629427695	10.9951425987987	11.6042736401609	13.5602558069033	12.1370199760538	10.2948443694893	9.62312240398653	12.1674379889169	11.3226246887858	9.20352088189751	9.80432102739559
SYNE2	12584.203568913	0.454622102332744	0.000178654174697341	0.0017363960807339	7.69889129920541	8.39085990066629	8.59439311277296	10.0613257990015	9.18621884371739	10.062857397104	8.88378153838881	10.4790260692049	11.9632060663271	11.6374437175296
SYP	502.398203833579	-1.51148934777472	0.00436222840484147	0.0239796970277658	2.09722184796287	2.14997889801087	7.13965533215381	6.92759719556768	2.46988729429099	3.06236035262239	3.27618717571095	2.96262795078857	1.59454074537041	1.57069998969714
SYT8	8.81676783427608	2.31963796303215	0.00523821496203418	0.0277049818121254	0.0704731887201488	0.0515242719271538	0.0311753519823011	0.00991508069604226	0.0864876461534519	0.0113244571444014	0.123747891226512	0.10560605095772	0.159358882767091	0.250706965166737
TCAIM	686.281451963875	0.49950550928037	0.00218104133888125	0.0136984701634998	1.94133604617218	2.18275594790063	1.65629575502093	1.81707853754678	1.99414581770228	2.3197191058755	1.85678732021961	2.47204952004236	2.75695430562131	2.57763005121828
TCEB3	1623.28758121685	-0.570463363340308	4.25535716839318e-09	1.50152068956198e-07	6.17121580771119	6.31254678214295	6.09197365979373	6.84494004648126	5.06740969621245	5.42710232564395	6.21690502188606	6.38323347516522	4.36742420911382	4.13028893808908
TCN2	57.8051157931501	-0.853347927691957	0.00665069158639676	0.0333096718801055	0.54204323857907	0.450116238491028	0.623637438479924	0.640221354403231	0.459903902180856	0.447337919090233	0.520645270898356	0.495929573802505	0.274396717186733	0.350829270245772
TCTEX1D2	47.200048329422	0.791332359697959	0.00672583008191331	0.0335390369008342	1.02103091904928	0.985373244639257	0.963573962103915	0.873403249766833	1.37477690767633	1.20756405755999	1.19157989834469	1.02373818630911	1.60078618516457	1.71291486998348
TEX261	3358.94957568371	-0.654463177697799	0.000476799775734706	0.00396387389754484	20.9734185305466	22.9604443794822	17.0076313310085	17.2100770237046	16.0684791945638	18.8940713992076	13.6480260328655	14.6175802884594	12.902853778301	11.8063687604467
TEX37	17.366821471403	1.67714814416206	0.00852082260895626	0.040358824617504	0.121933667292494	0.101883422127312	0.349325824263992	0.294089265368791	0.390901809175975	0.447856671992154	0.432926281231367	0.455616055388172	0.546197899360172	0.834938403961796
TLCD1	134.07278584683	-0.73318632572143	0.00293829966392877	0.0173511138917361	1.9112982291677	2.77783405559477	2.20001967341767	2.03390858348287	2.04709105331629	2.88888131644597	1.8400192517324	2.08300656901568	1.45287728618445	1.19721587560562
TLR6	1622.46202976368	-0.458452158059027	0.000396949831920836	0.00341400696282665	5.22874668509091	5.75491633711106	4.69833966355585	5.21183260958241	4.34072322380622	5.08974234952076	5.06475245029013	6.08095613520473	3.85456662886723	3.69730070543232
TMC7	342.267372479995	-0.642343896297371	0.00532864956705194	0.0280451804472345	1.48102539141312	1.48276065844252	1.07344568712268	1.10830222454687	0.808435496806202	0.967391097723469	1.43601634443187	1.7013261190664	0.849619613927459	0.791431942669907
TMCO6	277.586281959664	-0.589764098103151	0.00160944762461863	0.0107279860284897	2.31456115224484	2.69481918097703	3.02996361819819	3.26663255166311	2.23883846228731	2.24790770612996	2.03850529346446	2.15084474498962	1.91634268421814	1.80411795110374
TMEM170B	547.096912373521	1.2218504908482	0.00259047091577909	0.0156962807534372	1.01523945400031	1.07724189331876	0.392731122947369	0.606593629393981	1.1974010547212	1.08054139166727	1.54229050795562	1.73151792070695	1.93397874460609	1.66389736672085
TMEM184B	2063.79991751987	-0.382952777935556	0.00990701321363073	0.0452905817846093	9.06734432630945	9.31657952241955	11.451354728785	9.94411004782743	8.2894518710037	7.44151162656546	9.19921508831378	7.93360939768323	7.23558912009153	7.910250145296
TMEM2	4279.63234062173	1.25815203842606	0.000697347311305938	0.00537605033534376	4.66792232684251	5.12231673363424	10.0752862258128	11.2376153552253	11.230756397287	12.8103898078045	12.5091972615859	14.7707237432123	20.057241725827	16.6776802205739
TMEM239	5.05805852934772	-5.24036870793878	0.00141215663939151	0.00963721195047806	0.0427510787688262	0.0416748222062385	0.0252158294039783	0.024059101257303	0	0.00457982927679541	0.0423466477329399	0.0310611836321501	0	0
TMEM265	156.252173963502	-0.654877650950322	0.00583717622983719	0.0300497412622895	1.64406398585316	1.55440141025569	1.43315567296922	1.18905424880537	0.907543700303555	1.16284918557353	1.1701020384486	1.12255117646591	0.931657559765779	0.909884065460272
TMEM62	114.621333873083	-0.540735711200651	0.00867281262385026	0.0408199430644325	0.761405773795076	0.842341804690581	0.803651318248952	0.778061599764715	0.505856315198101	0.631076648640968	0.546706793570573	0.81343157865575	0.525584939507706	0.562746372793073
TNFRSF21	322.878763065939	-0.712768089700466	0.00408158108452321	0.0226763302154694	1.38960569919044	1.41957008672445	2.11082755715419	2.12540998344947	1.67668111258718	1.75701968719338	1.49747860025668	1.38167257653341	1.120313656965	1.00937106681584
TNIP2	454.290173103218	-0.63134975884592	0.000816331499529909	0.00612302072803228	3.86251139393404	3.91773987018833	5.20621752641361	4.43161801472061	3.72923968491582	3.10336778743362	4.26931391856105	3.51286905677168	2.63255559763296	2.95391707286876
TNKS1BP1	3923.63595855755	-0.469967042369763	0.00437925161877844	0.0240511770399166	11.9501458765528	11.0745004105845	14.7856409593337	13.4182320319441	10.5924651324089	9.48506565356634	11.1754748058642	10.5649038987835	8.63685715595714	9.72079188715625
TPM2	2887.85328870873	-0.465027036441004	0.00607526362629805	0.0309325422679424	31.8010264099672	29.4590024743502	39.1770256577583	38.9860972968382	33.6807604877586	29.6361043468984	28.0907713084182	26.9295429942186	26.8679076345316	23.2761624502171
TRABD2A	21.1889864962704	-1.91046718947269	0.0013849307722201	0.00947398502779867	0.0838970437276987	0.0754937900985246	0.137035152022737	0.156172327593561	0.049783806160473	0.0414817210735111	0.0732239450887224	0.0738507290150947	0.0350240932942148	0.0241669685810445
TRAFD1	399.473285031214	-0.605111502168056	0.000515581389565213	0.00423506242748022	2.52974140635413	2.66589078936585	2.19701077032616	2.38586970417341	2.10440187550728	2.4222297815553	1.5647564067669	2.04874349662305	1.77267499333565	1.41770781292396
TRAM2	3028.01946662022	0.457248648475178	0.000983353680656489	0.0071540853718887	5.74900740412312	6.39818362398003	7.13880366454286	7.06122064485145	7.19252127915225	7.6052371102255	6.27600809253012	6.93572198472098	9.7768477348024	8.17578854957787
TRAPPC9	1308.65391902376	0.476911750203888	0.00273146491137436	0.0163260845346285	2.52521112172221	2.37171615340468	3.0854366122159	3.08665875553973	3.64419092013783	3.37965121357639	2.61449958542861	2.55100787103479	3.77086481090764	3.87459444308356
TRDMT1	573.332332470881	0.456209043736034	0.00671435923700292	0.0335246037872993	0.647886965710218	0.757293076525247	0.573515708510307	0.617479636845486	0.759404745585075	0.785512898836405	0.749869596879122	0.847756849202864	0.93565516674469	0.832480799410385
TRIB1	1279.29082764768	-0.63474752531467	0.00774465635981783	0.0375413751444597	5.18250360776496	5.48084463273306	8.38546323031483	7.69707370802598	6.5947876001797	8.76266024673703	5.81984837708512	6.29266788521944	4.59622569627903	3.94230713744798
TRIM22	604.811554833416	0.531847499891587	0.00153424103058245	0.0103060873856937	3.14005820656179	3.25997285624636	2.54531132682931	2.78702621565672	3.08288866165879	3.19472058624698	3.65001924035709	4.13103190951138	4.38744408231535	4.04496728072692
TRPS1	1532.28135411556	0.387789233316648	0.00820166942939065	0.039203751731474	2.10932963919505	2.24787573156314	2.31595988515702	2.77982115608183	2.21549835688519	2.83271549922158	2.56404865796604	2.77644959156347	3.3210311667053	2.81188485604626
TRPV1	400.750270934513	0.389878306676681	0.0100447811624284	0.0457467814650689	1.16503525557801	1.30223928884277	1.38425447279603	1.20412456876347	1.39835628000721	1.35728342164683	1.60694412938756	1.52913435353617	1.57392029579933	1.71572590478829
TSEN15	1186.3979416854	0.679111242087243	1.20526422278662e-05	0.000170322865167478	7.9349420201847	8.8107092367434	6.67542994346055	7.6430487709634	9.20490874452893	9.76172336976314	9.16197977621453	11.5556738753843	12.8027070982581	11.9045826027255
TSNAX-DISC1	5.24777502352963	2.68404553216879	0.00296729540773854	0.0174802894366058	0.00283840325090876	0.00207520992869345	0.00334834554896908	0.00479211986148532	0.0039810368488239	0.00547329443560524	0.00920144149864717	0.0139203062981954	0.0188272923659462	0.0233838301723691
TSPAN2	63.0114307919426	1.57812465889745	0.000146332082359538	0.00147482140954035	0.254612633974687	0.283960798366037	0.137450991653058	0.136002936954863	0.393426307321136	0.421623673028904	0.377723039671357	0.554973348512556	0.681789510805637	0.523590574753353
TSPAN6	865.550939237999	0.449556851415017	0.0016888879057682	0.0111579583901272	3.13004396146722	3.14320470607135	2.6379368656824	2.94511735783463	3.58320845312802	3.67388326652819	3.02467713267951	3.79551312346826	4.22620847217831	3.8221060804826
TSTA3	2131.04593391246	-0.478963274427719	0.000210873435633951	0.00200533985497167	13.5841400540514	13.6465006753216	16.2052173770222	14.3058089309396	11.7806153404788	11.2610434107338	12.8753605974016	12.2913572549152	10.2190359119608	10.362357197567
TTC3	4189.77145584448	0.608322594961185	0.00792421427409884	0.038206600887378	7.27307821313151	8.0432895999146	5.01939577329378	5.84987856761622	8.18399568775659	8.45779140950646	8.11979594894038	9.76782420409674	10.4628844001405	9.4072555409564
TTPAL	1666.39177267009	-0.432501100863988	0.000241708410501482	0.00224271993847595	4.61371387947888	4.82810767959469	5.14096685265544	5.60837095123373	3.96369482412886	4.25037239830707	4.43051277171925	5.17602049838353	3.91504262298575	3.50703250751649
TUBA3C	1204.45775303945	-0.513759383720599	6.9738629015224e-05	0.000783772793327409	13.6510451436573	13.8433360815808	15.8821031709292	16.1597532217964	12.2752871317654	12.0440238113872	16.6928742947991	17.2352219637174	10.9324097922225	9.76187533858331
U2AF1L4	113.278119372541	0.63504705815501	0.00543366576202032	0.0284724236224502	1.49573793988538	1.30908163958541	1.13337542093766	1.24113388863986	1.80692052816343	1.86668071458525	1.29774136202049	1.48732931466939	2.09354908947973	1.91337311608686
UBE2B	863.105211207902	0.406587831156475	0.0011109824480171	0.00790522666117015	4.90612721670555	4.8801153516	4.79398166331935	5.81830787748301	6.40123973448733	5.94156518176258	5.65987047738382	6.55165739783632	6.80563667278236	6.61551589141351
UBE2E1	1425.49242366668	-0.583453732785223	0.00925721724871764	0.0429324231559378	15.5961071677147	17.6078929480025	11.1726800108005	12.7695559215958	12.4579961227584	14.0216015190534	9.1636144091788	10.5880593876316	9.65566831849036	9.31436269474056
UBE2Q2P1	201.372086798717	-0.592752768130867	0.00975278782903663	0.044703095773317	1.97987868063796	2.0463403803366	1.49872725456867	1.73484397521923	1.25729476088566	1.28503619047423	1.44951948495278	1.25107224139224	1.07332284166219	1.32342591320991
UBXN8	118.606929726178	0.596712928183023	0.00349814433472353	0.0200240214016953	1.30229391144596	1.23217022672202	1.10701206122788	1.17478641898977	1.5310770792414	1.93265000042139	1.30377054715293	1.48190590390872	1.85928968312798	1.7642254241862
UCHL3	547.755641818393	-0.388683246147817	0.00406345950666407	0.0226122047158405	8.22636622328083	8.92579373491619	8.3963291487603	9.75563801403247	8.47791406560439	9.71698794128326	8.77337271766325	10.0178727088208	7.20356959697199	6.16108083877871
UNG	769.750669891561	0.363370460596815	0.00210909014364306	0.0133441108351849	4.98716208726398	5.54429258206161	4.79777159622125	5.15154235382949	5.58926804920678	6.14748586853542	6.52894646579869	6.82753304302488	6.61531995099961	6.46071525770607
UNK	1224.00039328004	0.496761152404416	0.00109027502306771	0.00778043438388517	3.60588048433386	3.335596597179	3.97812321986879	3.78016726125415	3.97813294087471	3.67093333430207	4.26770881750387	4.0945689592141	4.68018770589055	5.6235046110642
UQCR10	769.350895714898	-0.361843347656733	0.00998816330695001	0.0455390284602359	13.1687646046341	15.5752061041004	15.4172081006873	14.6459470453816	12.3665295425979	11.99282079765	13.8612087631604	15.5607291286043	12.3828989008711	10.3099906815365
UQCRFS1	1964.34881399902	-0.331025965537428	0.00284542132211715	0.0169130819782986	29.3284624927325	30.6606672035728	27.1675703085371	31.6589336680242	23.6577830838934	25.2079640432133	23.2701874486423	28.3089318336071	24.4956302007296	22.3980412533379
URM1	1086.8091859183	-0.342462994906581	0.000827071970815877	0.00618152846760608	4.48981329469939	4.38137989936015	4.61398979599822	4.79160551453118	4.45834150149123	4.29247770274276	4.35560631036907	4.86575906770936	3.66671900811359	3.4944822803909
USP16	1816.75352388117	0.739006334855851	0.00911508352576011	0.0424481288093934	9.65933588526279	11.0923730126942	6.0340804240842	6.85732990078099	12.4973020842196	13.3509083234467	13.3198796228245	16.0619416522172	14.8934278328829	13.0798766241196
USP49	735.208408893719	0.363709716689845	0.00215264636299363	0.0135697267430971	1.1045360424697	1.22601245447453	1.1525688100683	1.1433728168329	1.17792135871483	1.11348672821638	1.17108614445234	1.30798163067242	1.56105975877412	1.39290967194671
USP5	6593.41819332402	-0.354096479961303	6.68491752827856e-05	0.000756743233240703	36.4287124138109	37.9501055770888	40.3584118748732	38.9082126284741	35.4137126403718	33.2187507889453	37.3354161587634	40.6962021335485	29.9214769375464	29.7733734695197
VARS	3734.03439849279	-0.591986494267919	2.64291885605663e-05	0.000337163456737024	2.43075176748182	2.57929351507711	3.07578612013839	2.81448819036439	2.27528909792064	2.02918648565607	2.59117872759823	2.30506985641669	1.70575554354703	1.88214051059896
VCP	13043.1083072028	-0.328997638738383	8.04404988513609e-05	0.000884382298312083	61.5598141373023	63.2622127186206	61.2220038064204	63.9459447759008	54.1542846229334	57.1739003523119	52.6055598407496	61.1616639307448	51.5788197668085	47.2969130639167
VIPAS39	885.048514529185	-0.484963232960696	4.36920783473932e-05	0.000519588009911145	5.16515778647435	5.49038060177883	5.98293750599237	6.0974573722	4.46064519010769	5.10306204563644	4.64276618201641	5.28817959066543	4.15657775971363	3.90338625179883
VPS37B	960.370291226486	-0.796502827220362	0.010460153375018	0.0471282841102018	5.20527430952031	5.05948107977003	9.88897134491036	7.95928864890137	4.78225490883856	4.02012049402634	5.57025835318917	4.98578323542969	3.5950297308588	4.41975965338362
VSIG1	15.5762895807327	1.28810865416183	0.0102300045718096	0.0464077081737003	0.0514175520915548	0.0438577277575232	0.0556005401958756	0.0723408699732873	0.114184157949194	0.132197989211034	0.0972321668869716	0.116743401089625	0.118852704448584	0.154035298876759
VWA7	86.727578992494	-1.32634313939136	0.000370704827769562	0.00321564450297433	0.0840627766731334	0.0753753183034075	0.147812488278472	0.121394522656005	0.0722991721243885	0.0499548205055536	0.0702703695018893	0.0639575424354288	0.0478210328443914	0.036824632621542
VWF	106.815122467584	-1.00752910074301	0.000499765288726676	0.00412684609393523	0.235329257988617	0.328048941330268	0.19802709625689	0.240151825539442	0.182635358173783	0.100841228475264	0.267856550950473	0.256470906942312	0.115415884212111	0.131598687114594
WBSCR22	907.560388042602	-0.443930907467828	0.00196890228740561	0.0126056694883674	12.4566459224227	10.7923065906043	11.3484015578211	11.5209634630423	10.9015175305642	10.9035317972184	11.7161925705868	11.5724229626869	9.01370731546868	7.85479821856321
WDR63	80.8917358646935	1.47030368276936	7.36242178652111e-06	0.000112358664280265	0.261788404504568	0.181324818512768	0.319656645377981	0.398041719178182	0.302757918286096	0.525471316174432	0.481401904264819	0.475511843166247	0.797607307772063	0.80489693853273
WDR70	819.903561534558	-0.332546737122278	0.00337604988275786	0.0194417028100909	6.32633954040658	7.14098654122988	6.93576944483589	7.58042612864959	5.62290295768185	6.28624161495875	6.24292246123492	7.29125533941944	5.68180449750911	5.33570616095337
WFDC21P	425.024026890191	-1.33764759621832	0.00691444422605213	0.0343304852876278	21.5017273512138	21.6133949504151	7.61204034450939	7.89112692896803	7.8916843504657	8.29522868371684	10.9778926371474	16.863296658727	5.9240787895425	5.68558095934532
YAP1	4815.90566180177	0.34087759890557	0.00450730833101058	0.02457283831221	11.8966069102548	13.4537380430615	12.9041034414819	15.3135813948366	14.5787049031933	13.2028994878753	12.1776389327988	14.1760840627641	17.5605070130629	16.0756565051888
YARS2	882.824938316123	-0.386289048906872	0.00228637509009928	0.0141940701924101	6.75094554706363	8.17336662628692	7.89606292638883	7.59130153035345	6.28258179225326	6.58685251857619	6.377951156899	7.42002790985863	5.66379901107212	5.87804513166501
YIPF2	266.731209760082	-0.787494048675466	0.00902575490315475	0.0421120207048089	2.29519620864212	2.1028866415193	3.68432019009272	3.13107756781745	2.14949922282478	1.39124129714399	2.33888849883458	1.66231840009357	1.33145779585336	1.89304460290605
ZBBX	24.0143427204798	1.24855680726551	0.00696311362469291	0.034482462399632	0.0597998844768083	0.0757827524563989	0.0705434215355691	0.121153277579185	0.0950561256787179	0.210124358066934	0.0947746710618758	0.104275554942204	0.158662432215608	0.226919357775989
ZBTB12	100.661411340972	-0.809807481929933	0.00124108563670032	0.00865887762121731	0.211098443557187	0.206508641076105	0.226226029041074	0.22254131264832	0.208506111359545	0.12422056507384	0.191163145162292	0.124752596703352	0.100400481488314	0.146966883746572
ZC2HC1C	10.7769937607399	-2.1522222418304	0.00717083978398875	0.0352874315143364	0.0382643248087261	0.0610380361364828	0.0861741164427981	0.0665598919379576	0.0390313397019664	0.0536619032974041	0.0714192835505049	0.0379108525766208	0.0125855936515505	0.0156315299537504
ZC3H6	51.0566379409067	1.44039767776428	0.00378594877944511	0.0213514091978946	0.0252342141861925	0.0298701462047574	0.0722930989117265	0.0676243045999243	0.0775265439205493	0.0756920081219429	0.0545356256254858	0.0746461697470612	0.115934197174984	0.145792227808521
ZCCHC14	1834.42593718143	-0.32361255291192	0.000945792783240773	0.00693662107862119	4.87733660974615	5.02836187523025	4.77375189835654	4.92962432426428	4.0999581557629	3.97967084739965	4.81728503852895	5.44451626888037	4.04803998175225	3.73549158567461
ZCWPW2	15.7072573360183	1.54425367256953	0.00409105669221491	0.0227216283771884	0.0802571324384467	0.0552258794779299	0.0501225781615341	0.037195900275449	0.105944106266284	0.0788971883175828	0.0714205633971717	0.0771770471758991	0.170807546118762	0.155573728828088
ZDHHC20	1585.4890929281	1.28185176551825	0.00526616072912956	0.0278099895419061	1.70309785463793	1.83326311668472	4.54237996032468	5.28407937268466	6.83530483576881	6.18199378177661	7.33456759563815	8.7880736685245	8.69487173744634	7.31845561818188
ZGRF1	915.446304847501	0.659800389100495	0.00832359309987975	0.0396982025612916	2.034581347478	2.58097615146312	1.45365640000321	1.77365788633932	2.56509013216361	2.85882728256024	2.54977996309903	2.95275031266811	3.2550951186521	2.90274264335813
ZMYND11	500.716632398991	-0.847463745638124	0.00253838553971428	0.0154674536843865	2.25725157642194	2.37783785138263	1.3653724757257	1.62989695365637	1.30750933754782	1.21187731752665	1.73457743625473	1.97488120098818	1.0169032903378	1.09434879901707
ZNF101	154.1626470368	0.514686516058656	0.0045764139737572	0.0248785503717316	0.467248521674449	0.546582672372975	0.454734662360203	0.493039290719372	0.618481911537957	0.68700911642537	0.62166253994774	0.649262474885504	0.71847093261699	0.669265206018977
ZNF107	587.122380640511	0.523574303868712	0.010275110225055	0.0465631577287304	0.950825215543625	1.10973416521896	0.723369812992032	0.891558691108035	1.07456304042185	1.09062653284383	1.33615430991342	1.54414808033031	1.35725346896159	1.26646080956817
ZNF165	79.5366190905475	-0.811672804483212	0.00199564241581114	0.012743634066629	0.542490866177578	0.682366041340682	0.708766009546293	0.768170564081511	0.417255202074776	0.524917411935272	0.598816289929139	0.495868210050148	0.393956790425537	0.366975977088383
ZNF236	594.349818202906	0.322668225948617	0.00761233986009472	0.0369834459021396	1.05445691720121	1.12293493758537	1.1919029382567	1.2593449602979	1.18172642232949	1.34028460207262	1.22736512014498	1.34872527950116	1.46795918734433	1.40424358938721
ZNF251	679.28750426216	0.477242217740873	0.000658724832932038	0.00514056654364402	1.74530414194908	1.87442456898142	1.65905678152569	1.60371072092161	2.01781771933139	2.26143044580222	1.94076618449032	2.24633715635429	2.49134763110476	2.26892151124828
ZNF280D	854.067429129925	0.347967883290071	0.0057688654498446	0.0297604875082947	1.50831335469357	1.68335053706865	1.55061373181137	1.88906728407752	1.65996640232123	1.7881531709646	1.70520442796939	1.99963893036145	2.11845556834347	2.06570201859502
ZNF292	1949.36138872538	0.440215913644812	0.00148190895559317	0.010029587827063	2.54934841370693	3.02716830822071	2.87942135801361	3.46738814484557	3.46201606749461	3.96025908946789	3.57367133681939	4.10547657988521	4.19044858755275	3.82480322824776
ZNF331	846.690884594098	0.821538453386984	0.00466095230595892	0.0252025816317174	2.06270367465243	2.32012522924951	1.3501613353116	1.33584910981615	2.71503493758801	2.96443670191694	2.23122086865985	2.54544361978842	3.33726775475359	2.89005380413142
ZNF362	229.405829334481	0.509231720928355	0.00592102644028947	0.0303450397703353	0.995501858787415	1.02483701143709	1.29020723169508	1.15565277320709	1.27728991027913	1.27975116117166	1.47128758584159	1.2454874611341	1.69051077019266	1.46440158495891
ZNF425	11.0515379391711	2.06313875708475	0.00077833490701122	0.00587133759529447	0.0258525790193088	0.0189013060938487	0.0304972057303554	0.0387976060051473	0.102736235273642	0.0609296615904802	0.0372480146848075	0.0281751382915619	0.103928270758401	0.13553478830626
ZNF430	104.489326598453	0.923032928387293	0.00509343051779389	0.0271130024604291	0.449331764441832	0.4242239556707	0.246247362183241	0.290702373599553	0.545856124193805	0.582179390098706	0.412902654236308	0.458851909825947	0.71257560953291	0.620052017716334
ZNF449	177.217591851292	0.492551674409498	0.00975996786653435	0.044724076751607	0.717362891092572	0.659343122059675	0.580280904894508	0.688232157129126	0.80970797883698	0.944151156008097	0.68289174003161	0.882328160477637	0.881626158097003	0.972192074827406
ZNF485	219.075795883158	-0.572651307109077	0.00311771825550253	0.0182041693858497	1.64620539124014	2.09401902254522	2.17088981749341	2.29726485991748	2.01794569324253	2.142060420259	1.43177449497048	1.42944406566604	1.43654751938937	1.29305645319156
ZNF492	70.3562047544183	0.871002130999823	0.00956754538426227	0.0440066113177631	0.284171304975257	0.248360342090323	0.200364366631125	0.158085392619442	0.435217827000695	0.344316851522637	0.236481020439712	0.384456233309878	0.44119448331755	0.371837703813846
ZNF521	289.858971452532	0.829490594745653	2.51656153900702e-05	0.000323444977459212	0.800528498442532	0.96255341717704	0.723891965696453	0.706382182358352	0.75113540157894	0.957391613476529	1.27194364689976	1.17947518502754	1.48685374655841	1.32862029972617
ZNF566	382.39294793855	0.751244793566113	0.00129152361144443	0.00894900876575047	0.963128362648696	1.20661899735605	0.71482329537247	0.931556091176354	1.35430219977791	1.24446710770973	0.803849742388181	1.05770807244523	1.53288014261038	1.65296741406116
ZNF569	319.796430352193	0.63899389548367	0.00245289562664412	0.0150430258559074	1.18025521475763	1.25343637114044	0.894239980989898	0.954020601874553	1.52079740189276	1.54192868038821	0.88481004848506	1.07713521191365	1.6625622439969	1.65290357912333
ZNF609	3899.17531774096	-0.37829075212922	0.000177671999124456	0.001727852650229	7.83309042812991	8.59979083987345	8.38808354667158	9.00665126824094	7.18132940126472	8.7954746963634	7.0263849597355	7.86339979265313	6.89103292034469	6.02561587517398
ZNF616	281.043561591279	-0.50517392945556	0.00470269581388147	0.0254043146387108	1.05221660522519	1.3018843931194	1.1090511311243	1.37702973666799	1.08283487238733	1.28062473607815	0.898173487462806	1.180673666657	0.912317081253146	0.774061384050123
ZNF697	1995.90635679259	-0.568395838222023	0.00448275755370423	0.0244700463160271	6.20403711196983	6.42966622369542	8.52929400586324	9.31157627838469	8.12348593381951	8.49480077069717	6.37367973483244	6.57399557083872	5.0824525065357	5.09415150137656
ZNF799	89.4502727239099	0.632894063890064	0.00949236629570294	0.0437779985038538	0.41642152481404	0.440101240928771	0.321005081309284	0.371247981339769	0.520446877961769	0.498222236472509	0.360875446465676	0.444845470671146	0.611600722003656	0.580521773138171
ZNF862	19.2989185736614	1.99231752995043	0.000370250896587223	0.00321495270689987	0.0241245756949792	0.00881896520371249	0.0379450033503586	0.0248904896580072	0.0563936929288234	0.0749479731496802	0.0282411455401667	0.0482018049028423	0.101830718882286	0.0903396815943875
ZNF92	445.63519741172	0.662452401949554	0.00431628931137606	0.0237804153660424	2.07029752856492	2.39633345192021	1.58574519275144	1.63441590528117	2.28107931853676	2.74144030828184	2.36267155265408	2.94809854151728	3.22232371175262	2.8276293307421
ZNRF2P1	50.7844492059573	0.919466074500981	0.00555832926729429	0.0288999486018714	0.374930183597793	0.328942199169152	0.361873185989247	0.253200158069728	0.392006865912829	0.438168523728804	0.537738453888082	0.356608043352001	0.542603676741283	0.704556245378529
ZSWIM1	403.969325238391	-0.643142282784375	0.00014888813516313	0.00149270345078368	3.12933703801707	2.93900954623156	2.57645398455236	2.68785136974304	1.93985198127317	2.34081039453725	2.27943950360698	2.25015260939076	1.83000643104886	1.78105962642748
