# Supplementary material for: Integrated analysis of H2A.Z isoforms function reveals a complex interplay in gene regulation
Source: eLife. 2020 Feb 28;9:e53375. doi: 10.7554/eLife.53375 (PMC7048395; doi:10.7554/eLife.53375)
Supplement: Supplementary file 11. [file elife-53375-supp11.xlsx]

## Sheet: 20191104_phf14_regulatedGenes
Table S11- Genes regulated upon the depletion of PHF14 in U2OS cells
Gene name	baseMean	log2FoldChange	pvalue	padj	siCtrl.n2 (RPKM)	siCtrl.n3 (RPKM)	siPHF14.n2 (RPKM)	siPHF14.n3 (RPKM)
AARS2	1312.22222927135	0.409382544988947	6.45579441437672e-05	0.000333140043285364	1.38725188967815	1.51674356593475	1.97290324117821	1.8902307464811
AASS	1891.62038486581	-0.797889007931291	2.89083071869641e-15	6.0575862453015e-14	2.59599274095245	2.43830101534975	1.55709960487211	1.34716368607793
ABAT	36.1143301371609	-1.31016355696466	0.0071697858557461	0.0224676952806301	0.0523241886275406	0.0545783263859636	0.0230336215151255	0.0201069377264829
ABCA2	1949.16108786062	-0.384248880611092	2.43752309706081e-05	0.000136343339066818	1.59372343442858	1.65577022783063	1.19679088057163	1.30127941225661
ABCB1	515.492564013234	1.09385305311523	1.59827012124267e-14	3.09311078750556e-13	0.428974024474084	0.429364694190962	0.927849493362039	0.910184280290408
ABCB10	1117.13551988237	-0.326061629366365	0.00188642692443297	0.00685940589659781	1.96772321680316	1.99883237743219	1.62269129296606	1.55010124049162
ABCB6	1130.62458148767	0.35946724197772	0.000579847903891136	0.00240421652726914	2.00686322091348	2.0320552103738	2.53931067219959	2.66018294953002
ABCB7	658.549895592451	-0.335444952213129	0.0079650389401954	0.0246094918811162	1.8165269346153	1.75953544761499	1.42988143236124	1.41496211295146
ABCB8	1179.86027605214	0.381454182118376	0.000632522443858751	0.00259640123401841	1.22016029694017	1.44767263280643	1.73904711107983	1.7387188016409
ABCC10	2214.88926362396	0.684836844060422	6.1474326768859e-15	1.24688647833446e-13	1.88872509270669	1.93798443282907	2.97744697484152	3.19429119228252
ABCC9	117.745930318497	-1.33689572005513	1.30724379618173e-06	8.98220160632877e-06	0.115136712016371	0.130433431622959	0.0490009830701075	0.0483104193070372
ABCD1	869.377410054453	0.651907043477427	5.55066654154072e-08	4.8296521248045e-07	1.13137919737423	1.13925992442607	1.67754418703909	1.90448584610204
ABCD3	1814.64867819024	-0.528151753258523	6.2123992904065e-09	6.20912960656945e-08	3.49752129850522	3.44886902811065	2.46800284527444	2.36413680568904
ABCE1	3196.3021882212	-0.822834653955785	4.92183773450561e-22	1.8739989689877e-20	5.65521926648235	6.33384671004679	3.31610046488149	3.47925314673311
ABCG2	187.830877324169	1.23351657076795	5.75771567132446e-08	4.99264934239504e-07	0.136889311129992	0.153421427716285	0.320771867932242	0.362616834516659
ABHD15	525.018185216456	0.532263432516844	0.000180609986594864	0.000845555290092195	0.763914438902077	0.81131894954912	1.08468888850523	1.19987234077202
ABHD16A	1114.29760037112	0.500713561740455	2.37394731827136e-06	1.56501405813299e-05	0.321949072544188	0.33210108982227	0.449421729502403	0.478954382975741
ABHD17A	809.844538505056	0.497162164567124	0.000379385307014078	0.00164346209984541	2.15534188091543	2.6695133354067	3.07587629833997	3.74219705716803
ABHD2	8593.23734903003	0.335896033458959	2.99658614694596e-06	1.94050028748521e-05	5.02404106147458	5.21474489443814	6.2124439920601	6.75270336497885
ABHD3	199.928228018957	0.75398949139691	0.000548610865354328	0.0022890679116899	0.329613133615455	0.404329851798038	0.623411116315354	0.612224592915559
ABHD5	2177.75384485532	-0.68802250197833	1.67844470051251e-10	2.08665563749477e-09	2.72779591980114	3.45714758700055	1.90370690398192	1.94104309567416
ABHD8	341.460664010845	-0.434134768505729	0.011434238469054	0.0337102563209525	1.07782320763404	1.2348789948569	0.805251787025281	0.910080591035419
ABI2	3066.39877176043	-0.807339585532601	2.59637019510985e-24	1.19890747732853e-22	3.50551517854895	3.42754346357854	1.995079817234	1.98030951332462
ABI3BP	304.701018151905	0.898596437164648	1.73532065070972e-06	1.16238938825317e-05	0.328803657227954	0.25417449505707	0.548564848768013	0.548360520692353
ABLIM1	735.681199679375	-0.679063778246879	7.10825935913979e-07	5.14154426790447e-06	0.708805384896888	0.583751007140411	0.426381725459226	0.384892011051253
ABLIM3	7484.42757318242	0.512628706649423	2.62429783175883e-11	3.64094362192512e-10	7.56434295586955	8.21078718938205	10.7555317263335	11.8167928448185
ABRACL	275.653566472206	-0.769478948213256	3.13974951324952e-05	0.000172136682083316	2.56304310196211	2.49452182579475	1.40284100875235	1.57903764828065
ABT1	531.255264655587	-0.786506133690989	1.70603179617322e-08	1.61686233245424e-07	1.74953774460556	1.91057226870646	1.06703713330004	1.05878853151136
ACAA1	1036.05578863675	0.451433231256664	3.89040941654287e-05	0.000209288597224219	2.71711848564011	2.7021951741227	3.56228312555523	3.87760272615776
ACAA2	1361.70073360787	-0.517622280040038	2.53889482000401e-06	1.66540976275911e-05	5.45481019187422	4.74150386329627	3.73557514479487	3.41725857575719
ACAD11	144.180429869515	0.712188214620386	0.0046523787196484	0.0152720262551639	0.172792908656326	0.149400585079196	0.276345009241374	0.254861169950325
ACADM	662.952269937997	-0.998634666301143	3.67085491629228e-15	7.61852840004268e-14	1.9550177797387	2.02533329709688	1.01026588496337	0.986814016362111
ACADS	321.956587810313	0.636650897286391	0.000283149870055634	0.00126741686089723	0.689846916590563	0.799252325988986	1.12196078240559	1.19432741860545
ACADSB	910.539061395816	-0.375649146172624	0.000982079960989107	0.00383541356487057	1.03514525034258	1.09652971416786	0.848202713462073	0.798009854838982
ACAT2	1546.07067051204	0.514863845835588	3.97863781423382e-07	3.01163256969807e-06	4.32997598914272	3.86896123849512	6.03321701256197	5.73730094153273
ACBD3	3753.1329464827	0.419197515083247	3.92492465900197e-08	3.50543535682292e-07	5.48151135500467	5.60773608375051	7.53280417344961	7.33895572602343
ACBD5	1437.01532918149	-0.325075811160622	0.00076349610998365	0.00306609381519207	2.35100019253039	2.27019789355293	1.83777714505846	1.86547287475603
ACBD7	32.8184953239482	-1.7120114064845	0.00103264292724779	0.00399997739692718	0.0828647462033187	0.100963467200938	0.0275031595602923	0.0286418029137592
ACER2	146.290320633415	1.08480481863316	3.20370409553774e-05	0.000175389811241115	0.174071494284048	0.232782734900395	0.458399527357969	0.400154649775041
ACER3	916.94607371874	-0.447705238937454	0.000107391386894591	0.000526117365270116	0.818100057950256	0.919251324824638	0.643749675462006	0.631961683230924
ACO1	8434.5206673759	-0.704130372575073	1.05002930939904e-22	4.16502487425333e-21	18.394091523552	17.1338445930978	10.9004682232102	10.9870449319902
ACOT13	583.682859803896	0.352054042500908	0.0085472925334317	0.0261215989072409	0.740213966793214	0.695179434487881	0.912787118554018	0.927992726909208
ACOX2	206.663466782168	-0.513188806130544	0.014060398072014	0.0402877343474231	0.655772325759732	0.639744218647655	0.477467037093065	0.432782873772931
ACP1	1858.34411491414	-0.351005403833012	8.25369570070067e-05	0.000414787115729555	6.70355151535765	6.92293627191421	5.38882100805714	5.3248382765889
ACP5	173.536351393615	2.42606085903781	1.32849830021802e-20	4.50503262877505e-19	0.139001590196707	0.19827666299729	0.876569092406928	0.918511833259004
ACPP	228.856506254998	-0.83371928474557	0.000544716907084362	0.00227469468181023	0.398214758761248	0.547740579831893	0.209539938598086	0.322704588987196
ACSL1	1654.64252989674	0.435677502498863	3.29746171099951e-06	2.11997622994094e-05	1.77416397507545	1.8774003642506	2.42623969913778	2.52586806537024
ACSL4	6766.38751352392	-0.386517541964452	3.5744413948354e-08	3.22463857899878e-07	8.6433751246402	8.9934941862933	6.62763142070057	6.90654191858882
ACSL5	249.431028886898	0.61761978794186	0.00174947289328165	0.00640981333809674	0.339785790091184	0.305881736348684	0.465148113970312	0.532295271062694
ACVR1	3638.81154666522	0.445007367808614	5.33935071858237e-09	5.36832667880234e-08	6.13585516358077	6.05069425086205	8.28446164576189	8.36346708672284
ACVR2A	578.784943137666	0.382147403813902	0.00563814714575402	0.0181126520275523	0.588299607928124	0.547351628736445	0.778825801049179	0.707249568312585
ACVRL1	1360.92448245414	1.03494864085119	1.82296208888142e-25	8.99170131632678e-24	1.25409341652848	1.23990634888124	2.56315537095321	2.56558907517956
ADAM12	1440.81807127527	0.928150838995655	3.21300670698909e-15	6.71416752305065e-14	0.646465145575887	0.721505359279141	1.16591899746202	1.4440725387347
ADAM17	2771.09673032309	-0.561511416631855	1.3954471741785e-11	1.98870858068665e-10	4.65884017543103	4.62007310512361	3.03870941052785	3.27242318358561
ADAM19	12854.0286775292	0.694025600107182	9.99759664569643e-23	3.97600754558692e-21	9.57793271062147	8.92787569342538	15.2905803302888	14.7550172896239
ADAM33	3140.6524026622	-0.673683339684652	7.24742366963608e-14	1.31701986111377e-12	6.12593491158623	5.38430245864177	3.70298044051019	3.54209863361544
ADAM9	38984.6052697235	-0.736776421569027	3.09527913885584e-30	2.16698067638239e-28	52.8770323391553	50.1501264504005	30.7787092589933	31.2582318994177
ADAMTS1	10074.3496001184	-0.468573651613704	4.93950893439325e-11	6.61737387401255e-10	16.0311481372359	14.9094764126655	11.0475158417052	11.3959179654446
ADAMTS12	6980.63524338644	-0.470190522105785	9.345824318277e-12	1.3692842426974e-10	5.13804429671491	5.03710882920996	3.65441549286575	3.71611508565408
ADAMTS13	76.2472738667153	0.963298699560622	0.00491829394297886	0.0160443894313367	0.0566618111125857	0.0647226335299909	0.126200135054746	0.110164971450677
ADAMTS15	1285.98064628271	-0.907125739982569	6.61238678809774e-15	1.33229947062044e-13	1.98073552465423	1.65184711715606	0.92803370512261	1.02014665301429
ADAMTS2	9952.51286654208	0.505162918162383	4.2292133222426e-14	7.84495833840166e-13	7.05609988117994	6.86026238600457	9.86232958320903	9.95783604268706
ADAMTS20	34.3813198598811	2.92805186844453	1.96327469957544e-06	1.30701442751753e-05	0.00974199179156407	0.00723766309017885	0.0833878971823529	0.0475379694373102
ADAMTS5	660.176184734732	-0.411384968206146	0.00625407393600568	0.0198396097798702	0.548445001617228	0.409653528523022	0.368527387889101	0.356662987516705
ADAMTS6	2681.08382665606	-0.654432734631863	1.72442108338253e-15	3.7424864426782e-14	2.64483985936809	2.76104767961566	1.68835361501114	1.75673124551095
ADAMTS7	624.34541402635	1.12426197483757	1.54645584594595e-13	2.72549387605695e-12	0.470874109949986	0.402762188660875	1.06009242705563	0.854448620554096
ADAMTS8	1249.10222056881	-0.368730258216473	0.00208615156833815	0.00751161817752262	2.39749640962133	1.91540387992481	1.6876696100231	1.67136115686286
ADAMTS9	28.9056579567813	1.64110692198212	0.00387827014534371	0.0130149503088274	0.0101843251168922	0.0136193181059066	0.0380274812848134	0.0357193033827628
ADAMTSL1	420.794382225733	-1.74208409630768	3.02389336001941e-26	1.56788354694249e-24	0.484282745528417	0.513739210493189	0.164111261131828	0.134205511063331
ADAP2	102.890448971454	1.18465863051366	0.000143501669672128	0.00068512802189157	0.139960066866508	0.141883998349348	0.372651988681413	0.268503495528169
ADAR	21755.8927021638	0.330250455730286	1.12536663186042e-05	6.6265774694665e-05	15.7888785149475	17.6739470891008	20.1607172991065	22.0355631370251
ADARB1	8519.34202163735	-1.47797690773973	3.49263214139228e-84	2.94778152733509e-81	11.0572588532515	10.5368575530768	4.06504619729715	3.71104293480798
ADAT3	81.4396152547332	1.52408081747285	2.21759005244564e-05	0.000124968067777649	0.111312085582535	0.181417867415226	0.366411281397121	0.467846964700843
ADCY1	116.447662367513	1.65667004726928	1.57830270385287e-08	1.50141356774783e-07	0.026394763159651	0.0269542640914362	0.075826818422295	0.093086152627776
ADGRA2	14411.9369064681	0.652097087816228	1.0186692610213e-16	2.47214431524531e-15	11.8703344576556	10.9860874278426	19.0082946561587	17.030625762393
ADGRA3	1991.15444857065	0.633126994464959	9.71079063299768e-12	1.41579972453456e-10	2.1224487367321	2.0842159099149	3.418045621313	3.12671508759402
ADGRG6	179.561564062273	-0.925856410985783	3.3103268723381e-05	0.000180770977155141	0.208608219001143	0.20743780819719	0.113527812325407	0.106035930068515
ADGRL2	593.104040062653	0.710953265234908	2.72559108053154e-06	1.77941622643695e-05	0.499670454926658	0.383916375903399	0.757458976406693	0.699842883463251
ADI1	1733.37479720661	-0.733916203816862	7.14485342298558e-15	1.43577530690472e-13	2.19622926992411	2.27441850917331	1.39914597360561	1.29517444910256
ADIPOR2	2415.74124747916	-0.338868111280306	7.01368268650049e-05	0.000358639742084535	4.26961156315394	4.10225997942754	3.24064506656534	3.40525775088581
ADK	972.963863712515	-1.1295158019089	1.46080306922179e-23	6.39553897049493e-22	3.2135032382365	3.52839547587923	1.52205990189118	1.56669549782782
ADM2	433.945772842996	0.403263547034954	0.0101686693679267	0.0304278954180701	0.615639759050229	0.522785452082481	0.774316188121848	0.74070717613486
ADORA2B	1188.51495551266	-0.975186649073057	4.56112467993389e-19	1.37758660313232e-17	4.99085598789342	5.29620239391856	2.45074154374205	2.80125681110977
ADRA1B	143.763285312502	-1.02593747615156	4.4715573277868e-05	0.00023710959484725	0.534115289094013	0.519129252168176	0.28135091307533	0.236785592333124
ADRA1D	134.571150346066	2.30412394870181	4.84620655162184e-15	9.90895961402947e-14	0.0814695074992202	0.130737280182431	0.514168022442651	0.51965009708146
ADRB2	190.076224754879	-0.658342279955127	0.00272587366256961	0.00953131661578123	0.644269118266395	0.759969510945263	0.437173914439608	0.453224311763469
AEN	2846.8135360984	0.420838457573468	6.06817188557833e-07	4.45136008139575e-06	4.66220275142516	4.95631870122255	6.21202368329435	6.70186395196778
AFAP1	10789.4936222439	-0.587746229878452	2.06970458914111e-19	6.41692900372077e-18	10.2477064843764	10.275654567155	6.79242716699211	6.90837510785305
AFF1	5726.05351830696	-0.599935934093772	2.18829592414985e-17	5.60617060365676e-16	4.3041236025899	4.43104042947361	2.8515495835947	2.93001481168104
AFF3	3352.84601661894	0.604391645338617	1.2127619163096e-14	2.3947441018784e-13	1.98970691848988	1.99787369640971	3.08896716060299	2.99239997812546
AFF4	13723.5747911658	-0.763646649278029	7.96656670813709e-31	5.81865776105859e-29	10.8929216844407	11.3002714187946	6.67416099682592	6.43643885176435
AFTPH	1170.04625836316	-0.563598567950902	9.09368320416104e-08	7.65380804640524e-07	2.16136590722313	2.00271913090058	1.42334827993128	1.40602725330749
AGAP1	3064.01305983318	0.469774677601469	4.17842209152021e-08	3.69921843906615e-07	1.44945873912254	1.33091741902348	1.98440747245669	1.8816164087558
AGAP2-AS1	617.353530545284	0.515831737470061	0.000111292378408085	0.000543932852071228	1.917225257211	2.17359928424483	2.90269947647794	2.95201940877617
AGBL2	61.2944251919887	1.03215535965373	0.00669589749523465	0.0211221085439379	0.0621773881892979	0.0762196628092317	0.137127022126894	0.145382436033822
AGBL5	622.896019854135	-0.440797949021188	0.000651641868508257	0.00266480303267226	1.24217948338615	1.24702833325997	0.937955154746076	0.901215262049196
AGFG2	350.086967703596	-0.565530453650578	0.000918718408787695	0.00361303910595461	0.495316800696509	0.574406276914008	0.34069268489219	0.38355648992254
AGO2	4089.92227696066	0.673970153774013	3.09806157325379e-17	7.8442919034786e-16	5.28543971057875	5.80435103258267	9.0218676342829	8.70977008864184
AGPAT1	3160.77394578271	0.330340394514039	2.38029556014723e-05	0.00013328953243552	1.0276608275227	1.05185679010722	1.30489281263473	1.31772194837721
AGPAT3	4940.63435473807	0.870669440732649	1.90052653068691e-32	1.488288611041e-30	3.16902172838384	3.33881907449998	5.9646950268028	5.96733416500969
AGPAT4	1093.34948163409	0.499648439039435	2.50989144211807e-06	1.64709593039558e-05	0.70491885394689	0.709903139035433	0.977000501661955	1.03049590065697
AGPAT4-IT1	110.302650099983	0.837138795526055	0.00393139481209223	0.0131688740781904	0.244739254618866	0.282451854916014	0.421669755606063	0.521463402589781
AGPS	2249.95219859545	-0.337712032319481	0.000124209395341889	0.000602294648590481	1.97463501017886	2.06033067997076	1.65533951120953	1.54519564835734
AGTPBP1	228.510013069526	-0.932399444051953	2.86230483544674e-06	1.8606818596537e-05	0.401952134553985	0.411370018136108	0.21709512690105	0.21015050137571
AHCY	2125.01546351164	-0.512830042590648	3.67981838026504e-09	3.78495604827261e-08	3.85227581413818	4.03444711037986	2.71677769020106	2.82726130982223
AHDC1	1885.95445457068	0.572233007200469	1.45076088485445e-09	1.58219378052468e-08	1.38304566040071	1.55584393882436	2.14677275471832	2.23076202095352
AHNAK	296491.675530152	-0.329839437123776	7.99760158846324e-06	4.81758776098071e-05	111.535463775354	99.3733787137417	86.2643619381766	82.1153987291567
AHRR	5218.24276436837	0.447631068569068	9.40863578804665e-08	7.90138169662823e-07	5.11691922532035	4.47631534205915	6.6433045621329	6.49538163511132
AJUBA	3390.51492668149	-0.950094457797872	9.54474302747601e-26	4.83345786911385e-24	5.6302115438829	4.94441859061553	2.83794778052077	2.65649270072997
AK2	2732.09832632856	-0.360009233480876	1.12389099958313e-05	6.62272999081185e-05	3.28293981953802	3.26570055756041	2.49023628284593	2.6308231822499
AK3	3231.28037625271	1.02631679504272	2.58184023333325e-38	2.56361547874502e-36	2.85712258441575	2.80812934589947	5.84390935133562	5.73555256446956
AK4	2729.52756218839	-1.46712654592028	1.15599702053756e-54	2.47350799098685e-52	3.11125139372183	3.59152243874898	1.1612534695816	1.2698755190154
AK6	385.232251563615	-0.422105253977217	0.00818203075826777	0.0251724202672345	0.983473884311768	1.10182339091438	0.763738422850498	0.795242871068338
AKAP1	481.549260099616	-0.416412447899603	0.00363302144046522	0.0123115908372848	0.707848444745368	0.7455311288946	0.543880753063288	0.547816745519067
AKAP11	7094.06155102696	-0.455791412564999	3.72786286121755e-11	5.07470363688324e-10	5.02707596023938	5.15406435681104	3.76289567242972	3.68256749894341
AKAP7	203.075907196984	-0.68634869196478	0.00118519196694218	0.00453423227443607	0.453634538896347	0.436395324719512	0.260752822090729	0.295292378052694
AKIRIN1	2126.11444653755	-1.17185113075403	3.1615142200237e-39	3.24525162368919e-37	6.37183085497522	6.92877895824545	2.92584148780231	2.99303811990058
AKIRIN2	1198.2829460861	-0.450033241454264	1.05856899536836e-05	6.26969987432206e-05	4.47757473451836	4.33405426485086	3.22182866101134	3.25328289891733
AKNA	1283.81882980924	0.539403260858725	4.65812529824416e-07	3.48087749783203e-06	1.20330827796861	1.13198363566075	1.7918263685769	1.61487680759669
AKR1B1	12700.6227759168	0.366332943059496	9.54839082537186e-07	6.7563648541709e-06	32.1873788214794	32.7215078542564	39.3849083897542	44.5778736764747
AKR1C1	174.500072658516	1.11808073506227	1.68535471088782e-06	1.1344221873198e-05	0.52201251447589	0.457361524248825	1.0223332006624	1.11991734090638
ALDH1A1	47.2981016362406	-1.60106818925218	0.000600321949867419	0.00247963324154046	0.23575702381189	0.133115563938187	0.0720712197048829	0.0503310007252188
ALDH1B1	4017.52841218418	0.403922153542666	1.83317835134842e-07	1.47034180473642e-06	7.07686525995548	6.78493429739077	9.37343795456154	9.03272131637853
ALDH1L2	8187.78194402588	0.481469411527632	1.14835582627315e-08	1.11119883520647e-07	5.972700289696	5.17692097887429	8.06561388713552	7.56213724789744
ALDH2	1931.37531021717	0.382818717331002	0.000456665057519889	0.00194030015200419	5.4103617442342	4.59651545319716	7.01180896508805	6.09400566637989
ALDH4A1	578.591096099129	0.349899268549366	0.00940481623278493	0.0283769549569948	0.837008756353619	0.913066063301993	1.09933005641728	1.13524613707423
ALDH9A1	2640.98274106686	-0.323854872661688	7.43204074658655e-05	0.000377617267632585	7.25564454331781	7.19663654170544	5.69187440829361	5.89584436769601
ALDOC	666.306366752949	-0.454524769204108	0.00088744255010302	0.00351094458884507	2.9581136177802	2.7846652286834	2.28692949516642	1.91553218482161
ALG1	1123.72254657729	0.494072337484728	4.06476789042542e-06	2.5783696781354e-05	1.44020821106656	1.43719418770591	1.94394116702169	2.1245562965991
ALG10	357.148943603058	-0.655304205788944	0.000176395265142636	0.000827608668328266	0.762062401071604	0.96070707665816	0.566288356448946	0.526564344468799
ALKBH6	251.9239531503	0.55671469212907	0.00406410849427659	0.0135731993846632	1.25869291114496	1.10388427772365	1.73037753436135	1.76762203220819
ALKBH7	268.247520366797	0.591426042954029	0.00144534822767174	0.00541764872311597	0.969778320371956	1.0100602020062	1.48068336739874	1.51010288770303
ALKBH8	670.742446311411	-0.335668093865974	0.00760297074530435	0.0236156883178621	1.09861497794024	1.16716473408947	0.89239607498518	0.907445425629377
ALPL	75.6834994908883	-1.13678658028294	0.000758772073728343	0.00305034806670574	0.243171792034224	0.248674203203046	0.106821722302941	0.117787966243608
ALS2CL	88.1426165497695	-1.55180695406157	1.72002944834904e-06	1.15367273197875e-05	0.120767131933261	0.137671920229176	0.0490231448501454	0.0389449828777725
AMDHD2	840.139692542891	0.952627383972034	7.20251895723777e-11	9.42469147272663e-10	1.28699759298911	1.78602553352328	2.77844847850853	3.1622967755655
AMIGO3	229.140881084153	0.496098794803559	0.0134708609447624	0.0388328879455086	0.377934867964994	0.410467550936159	0.576125634856609	0.53683255690845
AMOT	646.965534073179	-0.548040922630446	3.79070747657587e-05	0.000204359219248193	0.654508582830395	0.625829732744907	0.46694851523335	0.411268843785239
AMOTL2	8786.72661304035	-0.594393164809646	1.18759852112217e-18	3.43657080626437e-17	12.1696113360131	12.6730311739392	8.28212320047649	8.22080149826034
AMPD3	2806.27703659884	0.703809414151646	1.28286538374758e-12	2.06017874311768e-11	2.20525882292563	2.44019160393484	3.45671494266164	4.13169238614346
AMT	365.223776050315	0.480650737758211	0.0046310504712932	0.0152118743264619	0.927183671995212	0.772586022859133	1.14976459595913	1.240249593127
AMZ1	54.3130403111901	-1.22094959756571	0.00460733647537392	0.0151503583839568	0.0957884374645721	0.0592272686249893	0.0404829210387356	0.0263865318324854
ANAPC13	1224.16613862404	0.369316143448459	0.000312626599042879	0.00138547937358793	3.6553360025953	3.47806724939288	4.58422927596373	4.66986513592461
ANGEL1	466.469360343946	-0.467221338247436	0.00130627540207766	0.00495133131446203	0.816651905919104	0.803426025463691	0.573137126936505	0.603552831471719
ANGPT1	811.378119052581	-0.645597126842782	1.03671971548519e-07	8.63952052531598e-07	1.4207197675846	1.28566282194749	0.886943997303208	0.850599718921255
ANGPTL4	586.622099260421	0.738780806844936	3.81270553581267e-06	2.4276036253171e-05	1.24764487106545	1.59875304525253	2.10235990541871	2.64964757151208
ANK2	285.407565742522	0.788169365772982	0.000106890533454479	0.000524173516861111	0.0978647178989619	0.0788665533289355	0.133704318579762	0.174389231885012
ANKDD1B	83.0043214868327	1.00800596502785	0.00205948239877043	0.00742645540045581	0.126447388755395	0.139829268599357	0.25805482680158	0.278106202227113
ANKIB1	5235.21815964296	-0.410702863718645	7.36110803560378e-09	7.31871421969192e-08	6.00461065119152	6.08926483726793	4.54046483079244	4.58632351514107
ANKMY2	1288.56093458303	0.37252454346554	0.000472078885366893	0.00199772212437154	2.86601391391274	2.53670771580214	3.43478175393996	3.59780214001514
ANKRA2	642.162845407653	0.329144695530111	0.0167330671209167	0.0465498545506256	1.66010986236627	1.52533058129046	2.15723503620698	1.85988520553298
ANKRD1	158.261431065878	-2.09944038386928	7.21094513332632e-14	1.31196022114363e-12	0.902239714965528	0.697864714724948	0.232294856436554	0.140938700612344
ANKRD10	2526.53366152996	0.346436229496728	9.42134801316085e-05	0.000468201239829701	4.46726509282463	4.37860563721877	5.91372417717253	5.36778361013917
ANKRD13A	10339.7654911035	-0.75546560232479	3.21974300702042e-30	2.2335313133632e-28	20.1731223105576	20.7276495948521	11.9720417936906	12.3334140049163
ANKRD13B	240.935820295391	0.574553285327516	0.00517705922069857	0.0168091223938561	0.406799541259084	0.342619063786662	0.607275711989038	0.515351740530916
ANKRD13D	912.689315813713	0.32457433935158	0.00464627655608583	0.0152552914285835	2.1067046553175	2.27786135792684	2.82151025229064	2.67807405590436
ANKRD18B	238.716078288674	-1.282126556232	6.69632429581861e-10	7.64891418812604e-09	0.489440990216624	0.621352508466544	0.220967928984412	0.236008348267605
ANKRD28	4369.69767452063	-0.617092120472189	5.51503345743532e-17	1.37576992258387e-15	4.85692069664624	4.97721727326983	3.17181943756936	3.2603922800469
ANKRD33B	3154.29992978054	-0.423481249136848	8.14621199779501e-08	6.90224498998895e-07	2.41895963031408	2.34565332357089	1.77450570980865	1.79100942520355
ANKRD40	4398.44002620811	0.36392662588036	1.11231856964386e-06	7.78725516591221e-06	5.57451538696151	5.78261851047573	7.17043907054625	7.49052272383738
ANKRD45	14.4454388030486	3.94236225788597	0.000257807776435262	0.00116323603789857	0.00232334285706713	0.00621393073695176	0.0675751042497951	0.0573946230123758
ANKRD46	333.66653730644	-0.682075013564339	4.68557260843808e-05	0.000247593805451796	0.580261032040047	0.584846516986393	0.35614621356475	0.37268024505541
ANKRD50	4303.6039924949	0.490918939416911	4.37500060454941e-10	5.17237425558868e-09	2.57340078634007	2.43102892968467	3.62107464625949	3.43754111772032
ANKS6	1191.77723405035	-0.406385982863099	8.08196053948187e-05	0.000407099285529869	1.19322771412739	1.13547830823652	0.884286996335949	0.879717380776318
ANLN	7482.31413222907	-1.07577782340377	4.42411648561709e-06	2.77963845190956e-05	10.9745408645215	15.1230462575175	5.86299608739251	6.55023224582869
ANO10	4139.2256950984	0.419621491542318	2.5227019030183e-08	2.3255392785591e-07	7.52983941652303	7.7433251861833	10.0196080648398	10.4743175973654
ANO4	2067.25228033745	-0.323671197109489	0.000206072634688641	0.000949136262810453	2.48203580089243	2.61765192386416	2.03990724686174	2.04577408671824
ANP32A	1489.53064325952	-0.589667185170524	5.80160154505688e-10	6.72808631087818e-09	4.51205525012521	4.41857218469115	2.96727006397059	2.98856669084348
ANP32E	1668.69194438565	-1.58897904026372	1.2543490259223e-54	2.64667644469606e-52	4.02816683122406	4.65765082143164	1.42870167968864	1.46462395432176
ANPEP	6703.0015654305	0.475929235776279	7.8722222904598e-10	8.8974552649641e-09	9.69441350507738	9.20815156760445	13.763183852947	12.6156409813872
ANXA2	45584.1442228858	-0.374048544290652	4.07042242362368e-09	4.15296195364549e-08	172.949924363647	176.585623275728	131.075834091524	139.52011325585
ANXA3	875.274370529723	-0.77860483134248	4.14639427287149e-11	5.60427240155371e-10	4.18823761321331	4.22628708735478	2.59285853352545	2.32306201528474
ANXA4	2763.29129523825	0.560710459168173	1.4084107892489e-10	1.77123979389646e-09	3.79753552878375	3.46163248737408	5.49199568195321	5.26057252642451
AOX1	4214.93263262614	-1.10225619493773	2.47080560373873e-38	2.46950517973676e-36	6.82332027876171	7.52821865678408	3.16543534249374	3.5404343618652
AP1M1	3115.79013795244	-0.369069868573349	1.48355099025894e-05	8.58594538819574e-05	8.53893118249041	9.54819576633068	6.84905499548631	7.19047575420198
AP1S1	1203.19561478231	-0.453904411227923	2.21986149054758e-05	0.000125043143360767	6.94247985123314	6.24482312352991	4.75031339804683	4.92485987105037
AP1S2	2508.79899811638	-0.63226297667982	3.33792240862676e-13	5.65325721648358e-12	8.07613629265219	8.04215373752353	5.43534057600259	4.99277270421708
AP2A1	6862.95689301914	0.403886915777117	1.15754954729564e-08	1.11938209564069e-07	10.1305132269919	10.6562101500147	13.4983294656739	14.0866312221633
AP2B1	18047.2998721411	-0.3505874524589	5.58334758853966e-08	4.85530718746964e-07	21.9668983052259	21.2284403482896	16.8531671741606	17.1398523096585
AP4E1	2056.07623106069	-0.35704426296856	5.35882917800352e-05	0.000279764030488761	2.0661095437082	2.1254570502962	1.6838465699318	1.59735673203597
AP5M1	1134.8874893332	-0.363522459149901	0.000769032470577678	0.00308669518970042	2.60256287723805	2.4748640558193	2.0647597740128	1.89505142490559
AP5Z1	1868.43118917776	0.673733064349314	1.0294637534993e-11	1.49296568491806e-10	1.53032940344972	1.68259654549805	2.41213733058933	2.72625711095708
APAF1	3065.62838288345	-0.756831383373323	8.36229497525846e-22	3.12906367645632e-20	3.28275454397787	3.30978786033972	1.97271343246663	1.94076933392237
APBA1	2519.19305328117	0.445115069361385	7.0410360040739e-08	6.02294025753889e-07	1.10716586869467	1.13919096144496	1.53789049412658	1.52920315527556
APBB3	508.049310861786	0.884554403975357	5.20430174065079e-10	6.07715234772996e-09	1.02373075187978	1.01138057613038	1.85136201846724	1.92066999258952
APCDD1L	2840.94581722714	0.437521993063992	2.24352662835044e-07	1.77149982005717e-06	3.57247489806722	3.92534584661914	4.99140935717456	5.18652183388635
APCDD1L-AS1	907.172802395327	0.469634643722504	6.57001920398448e-05	0.00033823019907466	2.33896113037633	2.12218779177992	2.98835806724964	3.22356932602853
APEX2	528.178213485686	-0.378564636176214	0.00852083240099032	0.0260459730052002	1.61435731757439	1.8974126277405	1.3272407787807	1.37676880292683
API5	3269.82180498544	-1.23148060142765	4.31428579745731e-55	9.49893186014079e-53	7.24100374898444	7.49916873935457	3.17910370626069	3.11612786011845
APLP2	13266.7375357324	-0.798804706322509	1.59509455114307e-22	6.24553516004265e-21	27.9347465979301	23.9855842965328	15.1148188037421	14.843108747656
APOBEC3B	188.040582215926	-1.05605769650458	1.52348938116206e-05	8.80032345194448e-05	0.827150844019112	1.20865397127477	0.447220461579088	0.531603079552859
APOBEC3F	362.662357574276	0.902450840476407	9.01247204023242e-08	7.5938699520361e-07	0.321938845018896	0.295262990530041	0.545899838530984	0.615068543519074
APOBEC3G	226.073047386519	1.12826525196472	4.22028628377316e-07	3.17713524395847e-06	0.531236018038458	0.416292701159387	0.920313209851693	1.1733327967009
APOE	82.7584312256622	2.35017523759331	2.36826016287783e-10	2.89704941146928e-09	0.0850088872770728	0.147785148615874	0.594738474904	0.571670537689249
APOL5	7.88513402499181	3.64994826474441	0.00794396718617602	0.0245593710810717	0.00215923756827638	0.00288751026416113	0.0271576450113717	0.0355604356451069
APOL6	6711.47239378692	0.927626017674707	2.7133836692508e-38	2.67673537034144e-36	2.82219612231231	2.79106246595018	5.19333309871778	5.52213687656163
APOLD1	325.835311616511	-0.424425786551109	0.017435258196566	0.0482295051934142	0.448864543245178	0.503942055599032	0.321505710110531	0.390680826236274
APPL1	2344.16731629468	-0.619616798204969	2.45984374519521e-13	4.24658479284155e-12	2.86115225524857	2.90728542108905	1.91746754268471	1.84763260644336
AQR	2326.91454006746	-0.494488968523749	3.4264182873563e-09	3.54592279438126e-08	3.27018144893166	3.32438260942325	2.34498913932665	2.35048179536975
AREG	415.284454086	2.56277622391745	2.11448318978983e-46	3.18051768507793e-44	0.632236943776975	0.520294952927842	3.61276757522212	3.26607923895521
ARF4	13448.4031110021	0.325936293885394	4.08930745937593e-07	3.08924708716257e-06	42.4266653922461	41.9895370177866	52.7349374948295	53.4334716545693
ARF6	6258.32899026396	0.473534890437779	8.23556954372362e-11	1.06958310756504e-09	7.87246176943841	8.5072781842513	11.2647967243171	11.54013625151
ARFGEF3	71.0304388475759	-2.09277590539223	3.24441642516935e-08	2.94791712507015e-07	0.0429499948552822	0.0524175663838673	0.0134394484203651	0.00877501499579229
ARFRP1	1338.81567269843	0.357538862924213	0.000295680116215729	0.00131729393711125	2.67944834795005	2.72073414796172	3.39740996948311	3.54465536269039
ARGLU1	2142.90041599289	-0.438359698670451	3.40579419680356e-07	2.62111577699289e-06	8.50219954435861	8.83425767361912	6.43832191760275	6.39119119293094
ARHGAP1	7378.83688076032	0.325476130017857	1.65936302198737e-06	1.11878515490276e-05	11.5775147853204	11.817104752632	14.6133418058287	14.7942866747825
ARHGAP11A	1313.44731756823	-1.00680763293014	1.02741913016455e-13	1.83414235316803e-12	0.722805808120847	0.998991594828697	0.403018251164663	0.45505761010331
ARHGAP11B	179.005505679571	-0.909296264709252	0.000126145155720678	0.000610317581435842	0.302193422701134	0.406158926547126	0.178763060941952	0.198290679759705
ARHGAP19	651.655207710828	-0.56847392242312	1.69070220556611e-05	9.71817930645492e-05	0.801772051484586	0.92158120045014	0.590817861276369	0.572372848524557
ARHGAP20	1795.69846979212	0.5068987644559	1.149086461459e-07	9.52368877385985e-07	1.29570476673537	1.36418715486252	1.97883559561401	1.80883254216296
ARHGAP21	6739.37943312494	0.410584637396593	5.68916020988492e-09	5.70116899133059e-08	4.84277850948357	5.09709741948854	6.68803047945546	6.56113771071668
ARHGAP22	2359.76425787085	0.41355511858995	1.14056597897434e-05	6.71087465243153e-05	2.80670421603182	3.27937578330566	3.98042367742627	4.13952576594716
ARHGAP24	952.987441755135	0.397344937523466	0.000337092168935852	0.00148180099261385	0.876218230664045	0.879533122118063	1.13302672474232	1.18776172887259
ARHGAP25	96.7419461382671	1.27053978412323	0.000162828488933196	0.000768226833500966	0.127351338019889	0.0754206506816685	0.281736681641168	0.214728318083338
ARHGAP26	254.38904769126	0.643171019718089	0.000740675062850947	0.00298391290236849	0.13796431844005	0.132177131720459	0.211508821832288	0.212266550595955
ARHGAP27	105.347521105432	1.3864684446937	1.63242010836301e-05	9.39383571448897e-05	0.0172824911074534	0.0308154268254856	0.0591942930366473	0.0651324319917573
ARHGAP29	7618.90861554849	-1.17747563231123	5.70666556498172e-43	7.47376407441399e-41	6.47884924327643	7.48959640457084	2.92387712457917	3.27024656170118
ARHGAP31	2546.48686301025	0.507662375433798	2.94453667227488e-07	2.28115253060684e-06	1.70446028262795	1.49662241061184	2.42309499151847	2.14701430453806
ARHGAP42	960.833767514849	0.523068576200542	0.000104283693568437	0.000512379648347894	1.09042860352988	0.950020043679355	1.63940921723753	1.30475069809307
ARHGAP45	110.648277391882	-0.894532812162177	0.00242264843876726	0.00858723170362862	0.110341652858469	0.133831623212445	0.055136008653859	0.0766955189548637
ARHGEF17	7212.32448237234	0.324460044057795	3.34571324156625e-06	2.1491786708615e-05	5.04362852902689	5.04528943698907	6.46096642295082	6.21195099046056
ARHGEF18	1720.91122220354	-0.411382517307501	8.44939203050769e-06	5.07364283507797e-05	1.98969405803104	2.1269314118097	1.55577463924509	1.54700200403244
ARHGEF19	241.108839753798	0.933376938403437	3.11200346620547e-06	2.01010019806945e-05	0.313904412552304	0.295583907633849	0.550457461361329	0.620294199941361
ARHGEF25	744.853308529477	0.488197243221629	0.000146905710847986	0.000699401930179443	1.38605461353256	1.20001633287807	1.87278857271711	1.77504030649012
ARHGEF28	7005.15290892907	-0.654858674167361	6.23797823618088e-21	2.15380375827409e-19	8.14896656405963	8.05387486431183	5.24548056425986	5.07845240377946
ARHGEF3	66.0096578029981	1.05025614548269	0.00600334151258612	0.0191562201762672	0.0648448147463565	0.0450922292537463	0.130492909948058	0.0996732628781972
ARHGEF39	83.1607922786303	-1.06617192271753	0.00134477722833477	0.00507826389581453	0.155017535077139	0.213918239814592	0.0868559295791209	0.0890223644048513
ARHGEF6	1050.32062698506	0.436471306166248	0.000295421537216525	0.0013165280121424	1.06912535895584	0.918570371197579	1.42987583913066	1.27339429096737
ARID3A	1429.70358851809	0.874595877742868	8.31675481499538e-19	2.45336192523126e-17	2.25479266740999	2.16179775566325	3.97893808896948	4.15430254730211
ARL13B	505.089978016777	0.574203957542837	7.60061412006107e-05	0.000385061491778426	0.574708843421785	0.641465248115048	0.936745665600981	0.874996472153616
ARL14EP	876.63706228342	-0.421731705389056	0.000273159131085095	0.00122558580019042	2.59656035633733	2.59988849953882	2.02471635381012	1.86474956747951
ARL15	601.381051719404	-0.940120610282217	9.67137925221021e-12	1.41140819980382e-10	2.02444937790207	1.88940737994637	1.08905734182142	0.956960980746661
ARL2	549.158296260481	0.571468473973449	3.27344651304198e-05	0.000178949979942907	2.66589605376151	2.88761044308866	4.10166346507973	4.1656631280988
ARL4A	628.844355907302	-0.420793782092372	0.00197520023909931	0.00714628293222119	1.20564821517991	1.38231046354804	1.01320673670927	0.920906015436353
ARL4C	1281.79560748996	-0.419498334735802	3.89995113440302e-05	0.00020972763764195	2.15566269302006	2.34506127637472	1.65564352947878	1.7176349107271
ARL5A	1335.45752465044	-1.96892134057339	6.36801477722842e-83	5.09173055240285e-80	4.05550602878185	4.20827331341525	1.06830711193005	1.04812953342733
ARL6	324.220413976239	-0.540191308199259	0.0017178641589036	0.00630838585981714	0.480719271010489	0.47087216675536	0.346479229530016	0.309595210640891
ARL6IP1	3768.98649562801	-1.56515014296731	6.97254444244143e-70	2.78754987288343e-67	12.408893184153	14.4688764999596	4.48128368726559	4.62408744837415
ARL8B	4248.03887583279	0.340779988414623	1.82092455453054e-05	0.000104037178760541	7.34075236556118	8.12355596203005	9.63545056768791	9.99752163378857
ARMC10	682.903354237896	-0.327637723858072	0.00837440253521649	0.0256655080320776	1.04096539727017	1.04589963016897	0.84223078218152	0.82577206747357
ARMC5	480.511548185503	0.710848680927987	1.94822804524148e-06	1.29756600014505e-05	0.418303049606849	0.472190363059107	0.696331924924802	0.763195757399961
ARMC9	3349.08620471908	0.551373747998222	1.12949057826967e-09	1.25067207471377e-08	2.46584383423992	2.23610793808446	3.6440581467926	3.27311285668606
ARMCX1	1119.84421265594	0.476550147750679	5.86900606715809e-06	3.61858523426403e-05	2.7551567680972	2.64562543809441	3.75527015454537	3.79053460099779
ARMCX2	1938.59632695842	-0.624779966706936	1.11559194509897e-11	1.60645240094252e-10	4.79741098188811	5.17525958954873	3.33107944441716	3.14978028166024
ARNT	2678.76376437078	-0.381706519392172	4.66672532396012e-06	2.92478923768986e-05	3.83411922867189	3.71032509472587	2.82348923114801	2.98995663216927
ARNT2	2804.55652507448	-0.661900453761213	1.0413929043162e-09	1.15818748187201e-08	3.57974524268819	2.86493854623158	2.14973693765393	1.94108935280685
ARNTL2	4952.08009776977	-1.2784158467683	2.54154121693737e-62	8.04397795160678e-60	5.54873699909757	6.04900196301104	2.35783648074062	2.43694557197966
ARPC1A	4388.15970995972	-0.792787742389518	1.27834534865417e-26	6.86241079037248e-25	21.3046448480744	21.3070658143717	12.0725385967714	12.6099104578984
ARPC4	3470.9063532469	0.393952419892579	1.26316986319766e-06	8.72276207349945e-06	9.20857443803309	8.52202379374744	11.5309112806534	11.8658446713524
ARPIN	1910.18362831671	-0.369869940980084	3.55684143410037e-05	0.00019284630644844	1.93126055300525	2.00475014405299	1.48917041150775	1.56635227103705
ARRB2	146.124417813145	-1.11291567504053	6.90662589538791e-06	4.20880307271292e-05	0.628226171901923	0.586031972042206	0.291487027261869	0.271974406811292
ARRDC2	369.293364550148	0.446982434156515	0.00954719184781654	0.0287437452540684	0.590010749046984	0.71856354746885	0.826559524821275	0.958191736387219
ARRDC4	1943.66213059523	1.78133464401401	6.1546925763263e-72	2.7500614593985e-69	1.25882966222319	1.39570048621888	4.33243900920224	4.80806468595012
ARSA	1549.40121667838	0.434403804113913	1.94212736767065e-05	0.000110504865054878	1.74592296831257	2.01746025948084	2.50070930966184	2.592189562595
ARSI	536.814356399114	1.3979531646482	1.27422946316586e-22	5.02807636478331e-21	0.584590101637261	0.559521979467108	1.53999633558222	1.48832485788418
ARSK	1334.48204597519	-0.411457286623672	5.46358642143887e-05	0.000284646107388543	2.87741741230852	2.72653998344388	2.18461333147418	2.04367436009003
ARVCF	546.783218923984	0.991491994932894	1.27544067638136e-12	2.0504227254588e-11	0.533538187218912	0.583952447416387	1.11318503923176	1.11136640671167
ASAP3	1675.58019157103	0.569330193290482	3.81529961922077e-09	3.91635350102715e-08	2.06406574014054	1.93276667888379	3.06766841841828	2.88677024332266
ASB1	3900.61916963072	-0.361929074407737	2.25762983892586e-06	1.49121358752007e-05	3.98368425473643	3.85185152226976	3.09542167767096	3.02267487838678
ASB13	289.44845896506	0.732554073756072	7.11235332021579e-05	0.000362830327873467	0.468517642272072	0.484682171605644	0.738330339635416	0.851268030835305
ASCC1	794.279297817264	0.413552871932538	0.000492381816673373	0.00207554510513371	1.19590783322522	1.19059125180653	1.62745260649487	1.56127824452889
ASF1B	284.795560205209	-1.08747109901367	6.12852079340629e-08	5.2990602102122e-07	1.15795756967423	1.60125205241623	0.653807360230441	0.642895424630313
ASL	1039.83030269168	-0.38630280221627	0.000333519531378991	0.00146779511028669	3.33722093976712	3.51068896661113	2.56577236613633	2.68878643689459
ASNA1	1056.51226589224	-0.970796760880781	8.50353634604171e-20	2.71969945619086e-18	6.49373444477639	6.6124380598641	3.37092718609758	3.33582505741573
ASNSD1	1482.63237703931	-0.336414502716122	0.000400450064420846	0.00172536511023298	4.13375065861534	4.10737175334701	3.29490183053209	3.25365753708253
ASPH	47746.8134791582	-0.929136755492223	2.74309020858075e-51	5.14481808009368e-49	31.4248318977731	32.6189501120767	16.6315819987952	17.1094171284375
ASPM	3498.24668863236	-1.22781442338324	3.39673204123936e-06	2.18010786525173e-05	2.25986382971274	3.28731746005195	1.14069404796444	1.23328759839654
ASPN	37.9177081372565	3.77892877827458	4.93767169161942e-09	4.99421493602412e-08	0.014769493307163	0.00987549127235114	0.179957102189842	0.166663387792736
ASTN2	217.588603733199	1.12017071150594	9.52977594340827e-08	7.98986512871184e-07	0.112004010385632	0.100552269585146	0.237660243124411	0.227169978949891
ASXL1	5760.83660268311	-0.379047622858219	2.97255419161911e-07	2.29934028915873e-06	5.46180669629144	5.33352429227986	4.2868959869655	4.04061696042419
ATAD1	2416.77335831857	0.441665597667491	1.32320536697165e-07	1.08660194243423e-06	2.60261456240056	2.55684308015422	3.47301720711608	3.5602509673915
ATAD2	1450.25050635429	-0.968075036377392	3.3716911326687e-20	1.1135376453805e-18	1.96073517969372	2.28796058622778	1.08365300029964	1.09188773551322
ATAD5	597.368970524977	-0.691449218622715	3.4561948128336e-06	2.21453022338963e-05	0.577627030562799	0.747064731319014	0.397219128872354	0.423458398693429
ATF2	2789.85116266544	0.462660899569139	1.80914542028136e-07	1.45267110068258e-06	3.10026641002733	2.84776236421403	4.2669098897468	3.96230126478325
ATF5	573.978012876989	0.523968264262996	0.000204235049739205	0.000941650645110169	1.048573525092	1.17915540119188	1.50429652998833	1.70508920418239
ATF6	3438.57408172919	-0.617266028597547	2.43021087911825e-15	5.13487672817307e-14	3.3413134054456	3.44991200821462	2.25679409226348	2.18279152766552
ATG101	1124.07470057353	0.424040298614316	8.04379736099227e-05	0.000405445817877222	4.21915020841204	3.996314205599	5.3296878334817	5.74498593644283
ATG14	1726.96566693234	0.334223901616158	0.000252657517154535	0.00114169333748117	1.97303781298952	1.99112918407939	2.46120881731102	2.55340122437664
ATG4D	391.766834569933	0.413754885994566	0.00956017341575881	0.0287771259227675	1.00705703743585	1.00700654010749	1.26947101368398	1.42498799010936
ATL3	13642.279658478	-1.11085592289092	9.00792980051541e-67	3.33776754949829e-64	15.1741430364403	15.4215195179065	7.01492070594355	7.19755162577975
ATOH8	266.732762546278	1.33487525422735	9.05280035090801e-12	1.33007875175043e-10	0.145006631700154	0.174098695787393	0.410190798002328	0.393176426269061
ATP11A	4022.90599074894	-0.650006782673635	1.05425981892953e-16	2.55036865751233e-15	3.50894222445287	3.31948179967963	2.2234198590781	2.14352790955026
ATP11C	3888.63243684562	-0.641289991275426	1.37531648986747e-17	3.62111059169264e-16	4.69430247029019	4.83978059057573	3.04747462688963	3.0839135852524
ATP13A3	40256.1231676097	-0.427500578251343	2.31899408321716e-09	2.45677532163425e-08	37.2398205123741	40.3282158734959	27.5070648224771	30.352452618064
ATP1A2	85.5974041601438	-2.55424692871504	4.20515115609436e-13	7.05608629287241e-12	0.180813295698183	0.149032992655582	0.0312876524612182	0.0249711543690764
ATP2B4	28447.9280991564	-0.988951628828055	9.27035290767534e-58	2.27153550602264e-55	26.2174746573614	25.9808993099365	13.1590869447426	13.2270203081408
ATP5G1	706.801758124567	-0.435284843562551	0.000666191728109219	0.00271844875998798	7.40643220219116	8.08031753869384	5.42189140147116	6.06454054956877
ATP5L	1667.05307316803	-0.357814665290304	0.000170795709961344	0.000802327899113401	8.5121336128683	8.04813254451442	6.2774720729332	6.70235387556151
ATP5O	2224.14613762585	-0.38715533376044	8.96088583094467e-06	5.35538070588952e-05	19.7256478311189	18.7493063189101	14.465110228971	15.0750951870857
ATP6V0A1	2481.67841969824	0.553422238940211	4.87896951213284e-09	4.93812823639721e-08	2.80231051216877	3.151154315966	4.12436419221816	4.63394950708364
ATP6V0A2	1133.23351147925	-0.418298402451399	6.55228517021165e-05	0.000337546003071737	1.18875980895071	1.25095897205478	0.892706895925037	0.938345717606926
ATP6V0E1	3384.74815107629	-0.889193390271218	1.65041645368823e-29	1.08541674304899e-27	31.2956074086334	30.0334067590062	16.6865138540258	16.5442037385472
ATP6V0E2	366.489503924164	-0.649696734188822	5.56170778507339e-05	0.000289559508810264	0.977040738347306	0.989563478305067	0.609556299467574	0.648661617955728
ATP6V1B2	2782.84753103869	0.457016187156398	4.19987288238558e-08	3.71604361265007e-07	4.61754088923377	4.86908220616608	6.32690603069706	6.73354683674577
ATP6V1C2	46.8865341116328	1.11850364402256	0.0121343151285691	0.035498655003509	0.0632056819291569	0.0486652424335748	0.141527792162271	0.103392332486252
ATP6V1D	2147.08873529963	-0.334948492727251	9.20635780330375e-05	0.000458567172943576	8.02679708171909	8.29870449919908	6.48534825935078	6.49522055380155
ATP6V1F	1816.7095805417	0.490169743795285	6.80292706580824e-08	5.83239661307894e-07	11.0516755962476	11.7217931359556	15.9780192806715	16.0883042351385
ATP6V1G1	2017.42778089531	0.329293772878809	0.000159809412441238	0.000755390352771402	6.79886411000276	6.86149869207521	8.49368623115781	8.72642642599615
ATP7A	2476.44214661129	0.400170394866427	4.23382750233202e-06	2.6766669752571e-05	1.60070668269409	1.47798477362919	2.00927288590619	2.07168062975368
ATP8B1	8773.93136112307	-1.16326282458886	2.10248093155749e-65	6.94367180700465e-63	12.333962074438	12.812819610754	5.69889151248029	5.56211804966286
ATP9A	9261.32966839755	-0.418010089849664	1.48994218807971e-06	1.01548684258892e-05	9.10737170754888	7.99166767569158	6.79183591532393	6.05102350996906
ATPIF1	855.219932877425	-0.810943924443249	3.89367747837495e-11	5.28149537959574e-10	3.20437136550595	3.76782739340259	1.99942518249209	1.97912451259882
ATXN10	5351.78067947961	-0.342655903602464	3.08493564670409e-06	1.99431244020122e-05	11.3378880252675	10.7733632282395	8.69138529969959	8.80999292278179
ATXN7L3	3070.73404190162	0.595955872581195	1.02062914069804e-13	1.82416445946877e-12	4.19319156041357	4.1332783891971	6.41696864900027	6.21040606976079
AUH	437.280341794151	-0.650599571975778	3.06995406185911e-05	0.000168553459008903	2.1622866814622	1.85996683815484	1.32036794699577	1.25516941647606
AURKA	859.394001909892	-1.44212877941354	2.83537336970788e-20	9.38452989817041e-19	2.44726434740134	3.53231840792483	1.01935182077084	1.18424903874898
AURKB	479.913888156132	-0.693152931889213	1.63021595728346e-05	9.38470664003424e-05	2.11212667197104	2.69885452442682	1.39376913861933	1.58485456172452
AUTS2	181.001598330388	0.659368051586171	0.0048269523783853	0.0157701205446085	0.13020701818017	0.116082363819799	0.217241778385998	0.173430298612491
AVL9	3295.81555636028	-0.56132556129385	9.01526900514137e-13	1.4695275399797e-11	3.33163846981761	3.51446905330554	2.32965601669577	2.32256035234149
AVPI1	743.924073971971	-0.668595394734888	1.07255011329088e-07	8.92342898199074e-07	3.81611734782308	4.2626247966432	2.43559154431861	2.65943690983047
AXL	40945.7498063069	-0.350698065024609	2.43830386063695e-08	2.25320634128933e-07	56.2193784905117	59.0766143553188	45.7863117530296	44.9034151710945
B3GALT2	209.423093755611	-1.25551590957496	4.27592347194122e-07	3.21106423063426e-06	0.633158076432899	0.388270841845278	0.217236283443204	0.21443838052582
B3GAT3	969.337138511771	0.545587842630932	2.36695919962084e-06	1.56139140949369e-05	1.95714558403174	2.22752817880268	2.96348586776664	3.15325511141663
B3GNT5	45.0970457179388	-1.17166295019415	0.00703388960245537	0.0220828375367849	0.0918128971731276	0.094600803168168	0.0390444665317808	0.0440674555395099
B3GNT8	50.9623213866336	1.09678077958228	0.00878355244049668	0.0267897467729423	0.119212036160164	0.0929950877711743	0.234278163641989	0.224204055830035
B3GNT9	1234.39681116574	0.405764986824219	5.91737326068344e-05	0.00030691954447355	2.39049390743727	2.44205869920978	3.22808268149726	3.19259093446253
B4GALT1	6621.17903655049	-0.439188467959385	5.1572856409685e-10	6.03152297595023e-09	10.9097640460092	11.4312233444552	8.09508019829677	8.43356508532005
B4GALT3	641.991921982579	-0.367482562746932	0.00735066771380756	0.0229351702419726	1.96833414441381	1.71472196484486	1.50890658920092	1.35891419373024
B9D2	97.3488661548636	0.733268129703121	0.0158670958128918	0.0445569167448155	0.385219710338006	0.490999975219344	0.709727252934187	0.743457992560892
BAALC	920.615569109406	0.594080549355792	7.65700222108358e-07	5.51043002097119e-06	1.68809329508613	1.476814033378	2.48104604651032	2.32174654325696
BACE1	4630.18765326908	-0.393071283443177	6.19112280985245e-08	5.34406464359537e-07	5.37788532217403	5.36934452232233	4.11648094429429	4.09425253011412
BAG4	2038.53359907071	-0.625125414919607	1.13680396927541e-11	1.63390027447796e-10	3.25018074084389	3.57305332604405	2.27408546620382	2.15843506569508
BAIAP2-AS1	657.320075467819	0.392735816202219	0.00217892375586889	0.00781818840320268	0.816939060134294	0.763983879478404	1.04493277764166	1.04026942817952
BAIAP2L1	725.865726489119	0.400251463174281	0.00146972611351433	0.0054927623902853	1.05851120729909	1.04016459662986	1.45681155742336	1.32121391168041
BARD1	1036.60100937133	-0.417332454786416	0.000217367310320833	0.000997054401689037	1.23414191872372	1.418285676307	0.995838683495901	0.993050676417725
BASP1	3331.94994965777	-1.49903401749909	3.36679460813957e-73	1.70494478956188e-70	14.706407582142	16.1661976591631	5.51685491954772	5.43196070806311
BATF2	376.772439993659	1.03719868282686	7.01027412667588e-07	5.0762671369142e-06	0.542729521374315	0.757646229875684	1.07594934143843	1.59143569095877
BAX	2351.12142200334	0.492595234477037	5.49275927905915e-09	5.5189152756261e-08	9.09686291138386	9.3288885059962	12.7580607244269	13.2482378575604
BBC3	518.553919603719	1.30918034987991	2.92846487686616e-19	8.96960451801426e-18	0.90937192017493	0.839773438582436	2.24000987576672	2.11664652575956
BBOF1	204.485072942201	0.93296820815607	2.76936453940176e-05	0.00015326843745935	0.241752576084476	0.317947789892044	0.554411387882865	0.510016331835987
BBS1	896.744517659101	0.70480541229167	3.67005013225474e-08	3.29913618989432e-07	1.33688457208021	1.14999851665459	2.17709220940419	1.89709824005252
BBS12	209.175156820349	0.56277271747808	0.00972293490437775	0.0292265190081731	0.339936471151092	0.263566081122581	0.459107229373295	0.440063844918964
BBS5	244.483849131254	0.498869887082546	0.0110974688791395	0.0328320831960832	0.365616303911338	0.425844196664634	0.548545503558604	0.570119652587896
BBX	4171.48163676991	-0.521035528429976	4.80400507203569e-12	7.28367715113434e-11	3.31632620760382	3.38936562704131	2.39017894276026	2.29629132632032
BCAP31	3445.77365553025	0.349956746862564	5.062379725131e-06	3.15195380263074e-05	7.74929095305055	7.81380523797709	9.87650639401011	10.0238575251873
BCAR1	9292.2393457459	0.688970863895714	1.19966068490217e-17	3.17512981272366e-16	7.51076852392858	8.73888059095926	12.7998257058887	13.4616473694668
BCAR3	3120.64178684068	-0.416823028709133	3.14550869160828e-07	2.42817927047322e-06	4.94034872847745	5.36826098176721	3.88011985680861	3.86070188153214
BCAT2	743.828200283439	-0.344659915653535	0.00498245730429195	0.0162362701344495	2.44049071868419	2.48562158798126	2.02398061692292	1.86439830838882
BCKDHA	429.437125434905	-0.369645767572278	0.0163673571404469	0.045733472443934	1.61262913389816	1.74955776927872	1.36941353360399	1.23542111765622
BCKDHB	882.704101923555	-0.385567114500861	0.00122818708025539	0.00468221282891843	1.57778985237562	1.64324334446605	1.31301583906291	1.15694973555243
BCL7A	640.253992037159	0.36415513411845	0.00579770486592612	0.0185699123726099	0.948153579108858	0.870892330473707	1.12960512265579	1.22471531570967
BCL7B	1155.85315467834	0.385352966862774	0.000224213424906724	0.00102505276893859	2.93303302698154	3.04218852585651	3.80333612402901	4.02533799172641
BCL9	914.708850616481	0.562914281851806	3.01003227597322e-06	1.94837709146081e-05	0.78472593473356	0.680836867828348	1.11870681830395	1.05817182223316
BCL9L	8569.06570397896	0.541402826457161	3.89900977393965e-13	6.55966295522605e-12	5.23699342613762	5.86882151752378	8.11561206990999	8.08789844434011
BCOR	1578.84390447621	-0.473102858282503	3.73799400192889e-07	2.84507038463445e-06	1.65858060102595	1.69024903378291	1.2112320745858	1.20861904812101
BCR	2570.86425565058	-0.347294544150272	2.71359867944129e-05	0.00015045617203676	2.59442166038276	2.51944211950565	2.03310816532106	2.00080112666614
BCS1L	452.667157548068	-0.382278746171395	0.010819119947067	0.0321041103491218	1.65709422228932	1.78184717857462	1.38237593040173	1.25933035609819
BDKRB1	3240.80781860773	-0.353078001220884	0.000719283217106816	0.00290930528069402	15.2637018200801	19.1552725680975	12.7260442718363	14.2796423421338
BDKRB2	4902.00984961783	0.710255907387746	4.44408604616305e-22	1.70061851922693e-20	5.46487440039372	5.4395368304257	8.73936753311306	9.1640522053624
BDNF	5633.30970594648	-0.466592224734177	1.23860820662584e-10	1.56677234596667e-09	5.27267375865483	5.13448116382067	3.84499231124871	3.71125987411392
BECN1	2147.65681023878	-0.362546272595131	0.000128820420978405	0.000621874749127399	7.282401857512	6.42986841446943	5.42746694796455	5.28479710436402
BET1	874.909858160973	-0.332607175716449	0.00339057069991775	0.01157778154038	1.28878450297636	1.2569526967391	1.01723859173097	1.01174493608862
BEX3	4383.09405045527	0.344393543665569	1.78642630686933e-05	0.000102219918847303	18.3786200684029	16.7077315102043	22.5247092254565	22.2038677323641
BICD1	1012.73579210747	-0.384536214722764	0.00195847417874968	0.00709590739889463	1.97806135254469	1.95617275183127	1.67046473941795	1.34945033146905
BICD2	2587.53123522827	-0.770363916632864	9.32040315164832e-20	2.96846047546837e-18	3.02931607722581	3.23101057341011	1.87722194691068	1.80175090919974
BID	1186.03129902505	-0.562482348912181	7.04916918577711e-08	6.02650412325976e-07	3.254466178895	3.2882836624646	2.12916574991716	2.31808587217678
BIN1	1323.82025387019	0.535931673244897	1.50839412430458e-07	1.22937358028086e-06	1.68234979475701	1.71916896274968	2.36423882657102	2.58478590279037
BIRC3	1194.16649089317	-1.48991229491277	6.33294396687632e-36	5.65941674969324e-34	1.4142521798121	1.72434375066559	0.536452887965187	0.583309147665288
BIRC5	1138.25605587311	-1.08213069154952	2.04165836991798e-17	5.25709728064305e-16	3.10742116248073	3.946495028508	1.55921469748136	1.77904908372954
BLCAP	3211.65732950128	0.474780528971197	1.18218349934533e-09	1.30343292192075e-08	5.97181273057141	6.01355398492687	8.26464700095793	8.44678022409052
BLID	690.671411165571	-0.37686129760692	0.00252218863520833	0.00889233923093175	5.65851500485369	5.47791515086343	4.1934341775049	4.41973861572241
BLM	275.361325696563	-0.882081280425018	8.82596909751444e-06	5.28722880636591e-05	0.399494259542824	0.511905183349477	0.265569135189213	0.228005867850494
BLVRB	1225.61899407667	0.840432677455104	2.53708681843658e-16	5.90251499933975e-15	6.40863728243465	6.21433362615258	11.3691507130951	11.322467634941
BMF	801.303038536494	1.14247530672963	0.00120259438801601	0.0045927134094367	0.752160485354833	0.533326833002746	1.6696344768158	1.18025361337577
BMP1	5241.44600701289	0.441268171104392	6.54362892554629e-08	5.63553348281742e-07	6.75899067916206	6.17692125330641	9.14834064578861	8.48180872161961
BMP10	173.852843486681	1.59331843787179	7.72002156220284e-10	8.73938655536405e-09	0.0968844173097619	0.0755777284038296	0.302259090315315	0.222532722417493
BMP2	1262.20284216837	1.36176727046243	2.96395334742866e-37	2.79679374249293e-35	1.38818304266295	1.36083021645634	3.6929377555961	3.39592610214784
BMPER	1217.37183092616	-0.795604974938024	1.05500504249178e-14	2.09785819444177e-13	1.86379155104809	1.91508565366132	1.05495386202791	1.12969470103228
BMPR1B	426.361258589224	1.00408072554288	1.54730324232195e-10	1.93629578726154e-09	0.311117653739139	0.275041182089875	0.59746362133278	0.585548678620783
BMS1P20	782.923578672506	0.442468301887455	0.000411261635909022	0.00176543847774226	1.8700264323039	2.19950745801746	2.7629341974669	2.76973531397316
BMT2	1138.47414445825	-0.699681683655331	8.76823789651437e-11	1.13079006896304e-09	2.24171584226947	2.15783158591554	1.41940289370555	1.29774541309653
BNIP3	4935.8215762479	-1.03424284197242	8.74711626792311e-36	7.77112224223906e-34	23.3063343012437	26.7052615696823	11.99682731931	12.4856326165251
BNIP3L	9115.9768054689	-1.16334675287912	3.86682632582298e-63	1.24988990514687e-60	21.6522250595943	21.0909208035583	9.7778915679552	9.36706688814872
BOC	685.656254555846	0.77872288406266	6.10254464875265e-08	5.27960468700742e-07	0.622769370469426	0.47758086283135	0.961774973985095	0.940924074176897
BOD1	1633.0256717897	0.449487072133193	6.66668304369445e-06	4.07074954983144e-05	4.65584093435852	4.11931557354246	5.94766116909271	6.09763407375231
BOK	1944.67798998626	-0.417598121231985	2.85406394305587e-06	1.8561189821449e-05	5.24209695975143	5.09773083328209	3.94936359056073	3.81810082353999
BORA	356.932898189019	-0.624613230338538	0.000394505438010496	0.00170264960632257	0.729732922298485	0.944631462279481	0.549159900493943	0.535911785395199
BPGM	822.834405947747	0.473098195228628	6.54339166985793e-05	0.000337202192159029	1.96187550839218	1.83836772314096	2.68847441693768	2.60975857860334
BRAT1	945.324228043649	0.518924807266184	7.60136528333004e-05	0.000385061491778426	1.38818694716447	1.79304899733774	2.17114352874537	2.38758485119658
BRCA1	738.26590686574	-0.402772062843751	0.00117933754400304	0.00451638416145556	0.662542778346086	0.743975138477505	0.528106358622468	0.537549294837559
BRCA2	1357.07738786971	-0.530486718242298	1.87561803437056e-05	0.000106880679587988	0.751043738516587	0.984678533147545	0.5758203081034	0.62732239685871
BRD3	2395.77798716384	0.571195083272271	2.14087569825384e-11	2.99486036904901e-10	2.12544847000298	2.08388054416445	3.20307193347299	3.07216711073913
BRE	799.965376497037	-0.429060465300077	0.000259879062886353	0.00117153790010964	2.34384163788855	2.33960160010588	1.70494023362202	1.78667600104626
BRI3	3353.13887676467	0.554730950020222	1.21540599493605e-12	1.95805385737736e-11	15.0692725537843	14.8796664004457	21.6939666867267	22.4568824513332
BRMS1L	509.139722814139	0.627746425991052	1.78605857436775e-05	0.000102219918847303	1.01826434945819	0.883182560866775	1.44797726494721	1.50954324549049
BROX	2665.45655617102	-0.753629105610604	1.73291148706395e-19	5.42812191989186e-18	4.37458581294689	4.70345261611724	2.6809631580009	2.7175444777392
BRPF3	3222.33902117192	0.589664588893363	1.63030876780616e-13	2.86994794907429e-12	2.58096466410791	2.67713479029451	3.85930347157958	4.07807288525933
BRWD1	5402.00152412902	-0.341483375996965	4.16538695145449e-06	2.63778901902862e-05	1.87471085559002	1.86335782326969	1.52497174125129	1.43423334240161
BRWD3	2409.3808239823	-0.336397660396724	0.000135002751819067	0.000648628022022538	1.34852681810437	1.237053816929	1.0371830063047	1.01901555943402
BST1	285.843529379962	-0.567213180970192	0.00439733457372657	0.0145606597306134	1.60592126985113	1.22798397657067	1.0415599103466	0.882363332212033
BST2	1101.02871548777	1.62475199291957	0.000391082438081864	0.00168835589637388	2.36289668619805	4.16156820322937	8.34893701877563	11.8069603337321
BTBD10	1936.40739067771	-0.372567839859428	3.10754717608458e-05	0.000170494245933828	4.54486254976876	4.66056607911899	3.65113137288215	3.47819679745278
BTF3	6751.06639459923	-0.431443729613013	2.77160357729445e-09	2.90788684711722e-08	39.3802819541551	36.9953455977105	28.5505071349683	28.2890715501309
BTF3L4	2234.19913561526	-0.371882583225248	1.4780855705303e-05	8.55757469035684e-05	3.24650460161721	3.43708997457674	2.60037156219899	2.57782395037728
BTG1	3232.83338402009	0.35339218348922	8.88093382356231e-06	5.31138854788074e-05	3.61863578988816	3.84967680935068	4.72496672409507	4.84191550270362
BTG2	628.204095410476	2.36167089687172	8.13557511525172e-61	2.33199353114913e-58	0.471546900358768	0.45610732953916	2.31223780927349	2.47972497602648
BTN2A2	579.954382900234	-0.458716452390699	0.000529392866565766	0.0022161852931571	1.05454423420272	1.07639204824578	0.774875261181864	0.780370306278606
BUB1	1047.24114044323	-1.04522770596563	2.25973767175725e-14	4.31823078104858e-13	2.06172269407079	2.71830502160234	1.06660138289557	1.25392916072855
BUB1B	853.037954191483	-1.19202717963138	1.03276572311819e-15	2.30055379261166e-14	1.6218932384445	2.28646828933037	0.833021025794261	0.878529020332228
BVES	1690.64550722332	-0.871892147149206	2.36377018230611e-21	8.50957265630201e-20	2.32698424633853	2.32312101066226	1.28719529313133	1.26173693881527
BZW1	8416.76993135628	-0.376685487616439	6.30920680222195e-08	5.43981099542315e-07	15.4449829064298	16.3651354757304	12.4619246881959	12.1070173681999
BZW2	1305.31422429198	-0.946168307934084	4.05635564618713e-21	1.4166472408477e-19	5.52975322967257	5.76434306110945	2.8701375160997	3.01018233374055
C10orf111	23.5716257889289	-1.61399451248203	0.0130694272650845	0.0378263934103952	0.162925434483771	0.0919926403061741	0.0569217267814194	0.0265008925305425
C10orf12	2985.84191228198	-0.518098728149172	6.00447094094673e-11	7.93216717694459e-10	1.47294100782179	1.46490811989392	1.01776658092336	1.04081090410792
C10orf54	1576.20860901266	-1.3770760574048	2.08296565577758e-44	2.85084812996153e-42	3.04302969699221	2.82301971233752	1.15364029142318	1.11320401891285
C10orf76	2135.11496599871	0.423171685566555	1.15513114910535e-06	8.05358073300064e-06	2.76311013320147	2.70957457313523	3.6018447527646	3.76444338329049
C11orf54	597.861702539815	-0.913509394614807	9.88278663950988e-11	1.26592997156353e-09	1.88036165995339	1.64391064914435	0.991386045408244	0.887288962475745
C11orf80	414.283470858421	-0.392143242963347	0.0114024953106147	0.0336427867078769	1.30462693427759	1.18094204180348	0.937468537132389	0.966644550717463
C11orf95	1572.35523552192	0.483821038354642	2.99430201982744e-06	1.93984802922041e-05	1.54752115541867	1.33950783836947	2.06156483214089	1.99669531512446
C11orf96	64.3928470165773	2.12941308049548	5.38158498475679e-07	3.98426116415327e-06	0.0981314941233077	0.124980489445769	0.367333733822865	0.607115891493193
C12orf29	631.240673052579	-0.75700825130246	2.52461639818484e-08	2.32589280298509e-07	1.56976571213693	1.83068150747815	1.03538521605855	0.97791198024044
C14orf1	401.623355307955	2.5392600622781	3.20290157100316e-47	5.01633821305979e-45	0.49161633122702	0.447267839891898	2.69250856324188	2.80572606946293
C14orf132	2049.07425159697	-0.744784403021914	6.00273284650745e-14	1.09344745088898e-12	2.15543025285435	1.86211226067048	1.22932673165737	1.17863284490705
C14orf159	1311.08554632529	0.351667879181411	0.000645881381114797	0.00264694630210305	1.55284735672222	1.72921664055929	2.05551937950403	2.14034237886449
C15orf39	1111.92131044132	0.554324441873139	1.34236278972063e-06	9.21517193919374e-06	1.16347153379667	1.34406395435413	1.74764230595796	1.9404869997569
C15orf57	411.73723109483	-0.72372189248788	3.5850196627098e-06	2.29031197291368e-05	1.03140380340646	1.16043647230299	0.649974227031358	0.679683066450629
C16orf45	1166.57959097765	0.36400880408517	0.000679470417258402	0.00276446560765657	1.38021046309879	1.29838855878611	1.7919676427905	1.66880532366464
C16orf87	648.526044293836	-0.344455139361286	0.0102524729001992	0.0306484786107491	3.19032268715973	3.27027762260556	2.74067619123301	2.3565195321474
C17orf107	92.3160397563547	0.800169898821348	0.00958367757104818	0.0288421611845016	0.136918921623423	0.131939169520037	0.246916920728797	0.222912317710875
C17orf75	607.496449775431	-0.429044711018764	0.00140952134389367	0.00529511579041362	0.988462492471134	0.881839208184584	0.693995455886822	0.702448570671432
C18orf54	904.195315358886	-0.670725223829852	1.52423299409427e-08	1.45361881018708e-07	1.11730019155225	1.28569425053462	0.74119727159143	0.770938335090274
C19orf24	406.90594743877	0.440964052321922	0.00505163459912732	0.0164370170978673	2.23264682048589	2.52206438411413	3.29209827825839	3.16562044258067
C19orf60	320.345662714048	0.501377830770629	0.00398896740762952	0.0133422265206314	1.77002027452023	1.94265128049433	2.51116019236471	2.75503128174267
C19orf66	2245.73043139825	0.785081881479173	9.98650190460597e-12	1.45320820818749e-10	4.20007610043186	5.32127703016559	7.51264414390221	8.91962324006508
C1orf112	444.520291453037	-0.624076832464893	0.000180675221676989	0.000845600113283064	0.730544443701687	0.974815763178553	0.5580081111528	0.547540112971389
C1orf21	1142.35950779692	-0.904491480094039	2.03869672090895e-17	5.25709728064305e-16	0.919890504698662	0.857403986384072	0.481761684216207	0.471498902630621
C1orf228	20.0786351724865	1.78215900422971	0.00995438198440575	0.0298513563180206	0.0405116536994003	0.0246252359026679	0.104222499386371	0.124676083271658
C1orf54	428.799772846459	0.490068807099284	0.00141120688140874	0.00530013719217838	3.46011931486558	3.18117005802631	4.54558798617894	4.83474654282398
C1QTNF1	2253.61289919082	-0.667361944048312	1.52145646117145e-11	2.16625740938301e-10	4.54944596902094	4.79647802603351	2.69224763596567	3.21462302451042
C1QTNF6	821.623188812243	0.953026806744174	2.27074651263585e-14	4.33381671105073e-13	1.24282066671699	1.09952181545928	2.36432806365584	2.19493236205689
C1QTNF9B-AS1	198.393334169669	1.25792548128353	6.64438474361021e-08	5.70936046521077e-07	0.665135835148014	0.935323601014702	1.78956877245929	2.02017328656722
C1R	18784.6583229739	0.457471805597077	3.27648286275886e-09	3.40234638763039e-08	41.5962301943208	36.3641390905657	53.66597035404	53.7915127193796
C1RL	2251.88475214495	0.514450791498153	1.70604944636924e-08	1.61686233245424e-07	3.20232703827846	2.89190557641785	4.43234974601015	4.31222707389325
C1RL-AS1	1397.5646178339	0.841658502503657	2.32809870345257e-15	4.94663993046874e-14	1.24419020318403	1.08928367098744	2.15132707995348	2.05271580504905
C1S	18916.9842564139	0.762904340998549	3.99415840511277e-19	1.21358508980946e-17	33.4950444530923	27.9084546325378	51.8563960102999	52.757217660534
C20orf96	391.96138119132	0.734919915660147	2.1018919798095e-05	0.000118882885172248	1.27354732245316	0.97024654592626	1.92336674042058	1.84317168487381
C21orf2	353.684202600945	0.681107231014378	4.0478566909621e-05	0.000216990257053974	0.577269653137331	0.620547134287158	0.982619709355772	0.940547016823479
C21orf58	313.672740978958	-0.715305556218949	0.000153121179167579	0.000726035254030545	0.550053560206015	0.71374970311365	0.356690523902316	0.413665201008217
C21orf59	290.985025776721	-0.8900647197036	1.05517440838262e-06	7.41795909863433e-06	1.66121782102905	1.59925980187789	0.940086051801753	0.823621554664631
C21orf91	833.665113832505	0.381142989342063	0.00166592265861727	0.00613544170417297	0.823536308495154	0.817192510044452	1.1331268701052	1.00952889251426
C22orf46	358.19510988445	0.422255369296123	0.00943038586910966	0.0284428076481068	0.375457342741532	0.381990619159113	0.507920291118963	0.510147508025512
C2CD3	2282.87866356384	0.329867405908248	9.89580268968257e-05	0.000488900925078561	1.53978184455032	1.51961038513047	1.94240408405348	1.91609725364881
C2CD5	1868.91140125081	-0.43996123814951	8.43394813047079e-07	6.02674223885758e-06	2.67377652467667	2.63263511467578	1.98353738234572	1.9411532022615
C2orf48	36.2999191261736	-1.22390740906094	0.0155148338427378	0.0437131594471203	0.120719771049092	0.209431028370955	0.0718135518321209	0.0686591867336388
C3orf58	919.072145248845	-0.598692125439677	3.69154252534369e-07	2.81394450802917e-06	1.46460336773554	1.50327066042535	1.04509926266165	0.918488450888062
C4orf3	5589.71506884562	-0.486553596761806	3.96604977168726e-11	5.37224592979237e-10	12.8011919224869	13.6136971504953	9.22042471933331	9.68964163604651
C4orf36	95.6775008539669	0.79392747227059	0.00859583462486747	0.0262646660541003	0.464740216347345	0.484395747199946	0.805868720016681	0.844168711817488
C4orf48	166.76102753906	1.01702648373614	3.95513612234436e-05	0.000212544846022835	1.08024256388014	1.44458930171243	2.33069172624676	2.76530679090348
C5AR1	85.8029400745337	2.27452641973771	3.66266197655567e-10	4.36416947041833e-09	0.0954307371910069	0.0567190397211385	0.398007120532687	0.354105582572249
C5orf24	4844.44255933223	-0.655713440157	1.05697297891481e-17	2.83201648953682e-16	7.03129820898527	7.1590652507193	4.68556934891224	4.3469917643058
C5orf30	236.215368044972	-1.01284659860015	3.07633387905747e-07	2.37598700003259e-06	0.553130729539842	0.515957968863546	0.271085221734213	0.260851529441452
C5orf34	149.508752412199	-0.748130023585623	0.00230070561419259	0.00819707309822089	0.423836256384584	0.488159088188181	0.285026614214296	0.257776891368695
C5orf51	3669.83296405235	0.389372266768329	3.64846595427288e-07	2.78390229921213e-06	3.64578907985503	3.81082332035276	4.86052411484393	4.93426690207106
C6orf1	704.856102457503	1.0014899324205	1.9363063434458e-15	4.17846107523134e-14	2.49376113216087	2.3700596674208	4.8329854882537	4.95074961460164
C6orf106	6335.23111496033	0.652026235468085	1.15754918316118e-20	3.94293434766473e-19	6.90902101849559	6.78099155172758	10.7190256038951	10.8684863293614
C6orf47	881.416313349584	0.547723414774883	2.97423111299018e-06	1.92766719575712e-05	0.248197298924213	0.260546848708045	0.355018185103965	0.39092946015062
C6orf62	8478.47237524347	0.376648879698798	4.14794168622973e-08	3.67651867544936e-07	17.9745499993102	18.7484278354328	23.4086147545428	24.4171352807731
C7orf49	598.022036280013	-0.443701252739561	0.000758435708754252	0.00304980288178788	0.989657158330034	0.955931541670017	0.701841756470884	0.734806872582186
C7orf69	139.366023228745	-3.58570799914915	1.05206775217313e-29	6.94913621348442e-28	2.00703138697654	1.91271256115369	0.12089695130527	0.211071235117797
C7orf73	2157.18582860927	-0.338228035486147	9.36013135143487e-05	0.000465615964279628	5.97212956206087	5.89347549302608	4.5911246425657	4.83000779720619
C8orf31	60.2530890516725	1.32601296927835	0.000953052832432265	0.00373164397688427	0.0613264113862365	0.0371000907023017	0.121667847159475	0.129587805598322
C8orf4	72.7606892257731	1.17214709823335	0.00119299092425388	0.0045606235836097	0.175281768660385	0.121708322367395	0.36301591633241	0.314577542051174
C9orf3	1036.72079475187	0.332942636320099	0.00364839945750971	0.0123483532366031	1.14693045076547	1.03212933516497	1.43575986585467	1.3213148997153
C9orf64	393.485266220446	-0.376016161894342	0.0172329347298954	0.0477490035647134	1.0362972332083	1.10346481412893	0.787912901788907	0.865994652960816
C9orf84	32.3806269415651	-1.35175201230284	0.00916796389457461	0.0277615522197284	0.059614582690517	0.0459931895392522	0.0207275846404685	0.0209784453156059
CA12	2031.37835298992	0.50912307329099	2.05030020614033e-06	1.36256171179719e-05	1.47438151780412	1.72007177554938	2.08709652451256	2.46960854195955
CA13	485.346057946936	-0.469724822793379	0.0010169666602739	0.00395033431421146	0.899859315983271	0.899833587721197	0.665610631439217	0.637741744560717
CA5B	431.247537910855	-0.498177484195644	0.00158242332839931	0.00586918339966854	0.530854569952384	0.49940811226944	0.395463508081395	0.336037863429499
CA9	17.810835367231	-1.77299769839236	0.0122381740370744	0.0357818206257188	0.0958401354629546	0.122825098765495	0.0345303164973257	0.0292294271540218
CAB39	6172.65944256123	-0.430970954608556	1.04069387918412e-09	1.15818748187201e-08	9.80606895692858	10.2968948682459	7.41395261155893	7.54207616018785
CABLES1	1904.0238363964	0.742073179881433	4.22960694845884e-15	8.69501877685883e-14	1.74563478793656	1.59797573276562	2.87478184164078	2.74247192073217
CABYR	216.850790339276	0.584789627403404	0.00544168134514927	0.0175445719430195	0.485300319879595	0.400436656367343	0.681810527045062	0.656586069242058
CACNA1A	791.2881377962	0.387948007863324	0.00130281364549255	0.00493944220172768	0.498611129380894	0.466368766064638	0.648787808946412	0.619315424300023
CACNB3	2387.24232031247	0.728755687854154	1.70849951461759e-17	4.45206254306526e-16	3.41646382119136	3.41952800538868	5.81914771893723	5.54442703361006
CACUL1	3199.64186245953	-0.578050999757433	3.42504828181147e-13	5.78791251360176e-12	3.47939862113713	3.51894621049124	2.40435515945503	2.2972410748771
CACYBP	1414.11022268145	-0.465219686588574	2.07448257586189e-06	1.37769280229765e-05	2.93528122874294	3.1567621036169	2.2102697923746	2.21289247730679
CADM1	4768.32582394573	-1.36911303722955	2.07078615502576e-59	5.61774701199132e-57	10.1657396120362	9.08438066480372	3.84571166058733	3.6335956358144
CALM2	30127.1404039367	-0.825288162315758	2.74513311700491e-41	3.20800479334913e-39	48.5740606805648	49.0657698557177	27.6765804802148	27.6043613114482
CALU	47165.5373514722	-1.49596023384888	1.14910709197424e-123	2.90953915687878e-120	67.4763151308408	67.1771328541607	24.4844617989239	23.4061618097538
CAMK2A	58.0917045344837	1.58355373119212	0.00015146790331712	0.000719318658078675	0.0404936298285567	0.0321524032391481	0.130310593404764	0.0891500508359487
CAMK2N1	4014.55465827462	-2.06954980207827	5.31189994521789e-142	2.68994613225834e-138	17.6561397833827	16.2797214590839	4.06481416373603	4.05006287059527
CAMKK2	3026.4608198133	0.40371039358982	3.57361850863897e-07	2.7405559002142e-06	2.52745637543956	2.59525050462095	3.3518578374367	3.44604722148877
CAND1	6547.20653179495	-0.507924924883106	2.91562633760072e-13	4.98808505865205e-12	7.66515679014533	7.5233238572768	5.38175233939188	5.33508723117452
CAPN15	2373.7084064176	0.424321402488007	0.000355885544940726	0.00155496496943903	2.25778873927838	3.00880517255953	3.29051735930364	3.78680660515427
CAPN3	236.079735340714	1.37350508748727	8.86822921384314e-11	1.14174693403987e-09	0.249107146196141	0.190358049681246	0.584796909199507	0.565921060077577
CAPNS1	9889.05306821572	-0.331549880599747	9.07618083991699e-07	6.44625242262828e-06	36.2319921667645	38.2624508376032	29.3763060457707	30.0010695847131
CAPZA1	10990.8355982744	-0.572199232424599	1.09223032313248e-17	2.92133152623745e-16	28.749819526258	30.2902714220766	19.6890237824704	20.141742227657
CARD10	1055.92182302162	-0.75520327910106	3.58088431026149e-12	5.48425007560807e-11	2.08817932491637	2.09862083513985	1.28992457981735	1.19701588527256
CARD16	568.212012516896	1.18973531365319	2.16437414636201e-15	4.63115099035657e-14	3.03732941177436	2.57281735793111	6.89253775213001	5.98492765634607
CARD6	1026.52817100223	0.634170956397172	4.95643234442872e-08	4.33994928971534e-07	1.17539259127938	1.24166606248695	1.74433762711023	2.01917945797958
CARF	494.11280331225	0.35095955064056	0.0156909141569575	0.0441519481149284	0.355955233341687	0.343424649259679	0.424190607405882	0.472159940107995
CARHSP1	1636.17183425572	-0.615962666615654	8.84839470196203e-09	8.70627022747456e-08	3.53393435802971	3.01081727329179	2.2247492068878	2.06452172856135
CARM1	4068.23085775523	0.323114380290743	2.0711135713693e-05	0.000117273042773919	7.30961863349299	7.68357141637435	9.50984461798517	9.29723276680932
CARMN	432.370103812584	0.836749814838716	5.76558263429102e-08	4.99661901769248e-07	1.99842926531017	1.80370646144108	3.4385660354073	3.39083940037545
CARNMT1	1025.17974633266	-0.618403684828449	8.50332312818001e-09	8.38302952390076e-08	1.67335574748498	1.72958971526394	1.09816345958684	1.12519626808176
CASC15	142.539469210105	1.19131010474941	4.90303825102589e-05	0.000257829550396626	0.338370472967872	0.22405184195826	0.774726096109207	0.522996306560275
CASC3	3191.70962815357	-0.347244545260795	1.11897834934908e-05	6.59919219072638e-05	5.3297318394025	5.1916536520109	4.19547851355925	4.1035126351015
CASP1	1536.34033545679	0.87866180481989	4.29280594818061e-20	1.39649481723254e-18	3.34863857460792	3.28722973436137	6.1907100080827	6.0540741010419
CASP10	271.502778276891	0.770164447916232	3.31992126353393e-05	0.000181229765848392	0.181044510830211	0.188719791124814	0.315287094193959	0.316850007750066
CASP3	1976.98584857448	-1.12338267767332	2.22003338481684e-27	1.2855078433475e-25	5.64149888293301	6.84573266768947	2.83420581854297	2.9079425408049
CASS4	1417.23061054303	-1.17975395737322	3.39976935492653e-30	2.34769527454745e-28	3.83805471885237	3.58897318581077	1.71889637783071	1.5702002512052
CATSPERG	32.5027735058884	1.51772714836181	0.00477211730081128	0.0156111124104059	0.0265482300373318	0.0288457643020289	0.0665207997977406	0.0926060935039553
CAV1	46100.0321520656	-0.369995949553791	1.43503049701403e-08	1.37372295593176e-07	84.0951927934553	90.8206772051494	66.8170943752979	68.9440243486429
CBFA2T2	1918.07041050136	0.410732370010315	6.18627605947276e-06	3.79724872305092e-05	1.31057783825823	1.24842201067906	1.73882250627044	1.6760207802262
CBLB	1320.03238197507	0.777632042516551	5.07745315607966e-14	9.31602274724181e-13	0.783969665546575	0.714526881933797	1.29856871493872	1.28300572165406
CBLN2	112.78672217755	4.25885400523373	1.78246894527857e-23	7.73693377619201e-22	0.0128658924075183	0.0372782164787795	0.4180344202908	0.494405559300802
CBR1	1306.27510901464	0.508632393213451	7.70906582210332e-06	4.66226624081981e-05	3.23952668948751	3.56266105037337	4.42585963408396	5.27932195070377
CBX1	2943.05070708226	0.417878251182684	2.11184904812761e-07	1.67274299995592e-06	5.64213133796473	5.95112628324478	7.78213811086721	7.74652729307382
CBX5	14703.2058507323	-0.641800478220419	8.52464615319091e-22	3.18197602848345e-20	9.22010488566174	9.36506145582855	6.13843268507698	5.80890163464171
CBX6	3644.88134504695	0.960784278545903	1.809818086097e-35	1.58015841172331e-33	2.46716060637075	2.47143900414104	4.72389394184117	4.92169503724732
CC2D1A	917.868832418443	-0.347304947565934	0.00246761936443795	0.0087323720905058	1.67075159225324	1.80565218773782	1.31603970588863	1.42413357503367
CC2D2A	1196.86341485815	0.582583901037366	1.28058645644654e-08	1.23443334050355e-07	0.92025136152132	0.918771276225065	1.3631249083768	1.40064014773522
CCBE1	7144.32030946741	-1.15617954589677	7.49580005095464e-59	1.96338266162246e-56	9.38282198397077	10.0114722648485	4.27893804960951	4.44973904124997
CCDC102B	260.81029499134	2.39714079525863	2.96367527648297e-28	1.8154901129165e-26	0.199839323225513	0.147835777306732	0.96427433211433	0.892811801001353
CCDC103	49.6798454453101	1.36537836449167	0.0015365511733209	0.00571299202767771	0.0931364740539802	0.0968720369556312	0.216929048812347	0.274580328819444
CCDC107	560.234452758278	0.599446949051468	1.23050945612393e-05	7.21215264561524e-05	2.11130180769862	2.24948985232662	3.2068877358773	3.41661914314327
CCDC115	435.137903729845	-0.540852632771012	0.000555543308269781	0.00231417985720716	1.3762628050289	1.17028737614258	0.860396256122376	0.901059625851406
CCDC126	331.729745615429	-0.97258225750721	8.99675184995037e-09	8.84651482876673e-08	1.06396889567325	1.12416741093073	0.564158070262008	0.55331731101705
CCDC146	368.248933047126	0.521578380184583	0.00349416675827386	0.0118909809208292	0.634901359432395	0.478053184472314	0.835717858845102	0.775099424609743
CCDC170	30.1346351574573	-1.42397679604581	0.0137846354129936	0.0395871798098673	0.0704786913256821	0.0314166363778121	0.0212376330984016	0.0171957334080446
CCDC171	96.8896906382988	0.741185994716258	0.0156670049093674	0.0440928378256964	0.0968075513749459	0.108517126968192	0.189129260264586	0.153700920970615
CCDC186	1173.42948162021	-0.43792654093774	3.33482636956227e-05	0.000181912682967289	0.933200782569814	0.893089117809816	0.699259354584875	0.653476265497215
CCDC191	211.859182800524	0.873142330500484	3.35440098503318e-05	0.000182849155954876	0.245041966067035	0.217068729355308	0.42082994238242	0.431262701169507
CCDC3	789.912526553935	0.823818331776803	5.58648102796292e-12	8.36980471171723e-11	0.902106906129461	0.94070856563999	1.64867784751927	1.62095619324051
CCDC34	140.290822719343	-0.737186436434623	0.0056360766499404	0.018109830047778	0.303640306848994	0.431431120753469	0.208852256245709	0.231511364920234
CCDC40	61.8726549898246	0.984265729117964	0.00953768515173917	0.0287208152279924	0.0324101778273825	0.0421376262109339	0.073601039671759	0.073309973015453
CCDC50	9719.9379141103	-1.56623711645659	7.54745750284592e-92	7.1663108989522e-89	9.84554712860333	10.1431701656319	3.58410015671888	3.1837391681068
CCDC68	3140.36010714719	1.33263345387136	3.17230912206032e-37	2.9749209989099e-35	2.76790230499776	2.45054469519859	7.21754368133577	5.97885117904371
CCDC74A	75.9341063673042	2.20357379958211	4.41782102004429e-09	4.48474754970777e-08	0.100451149174527	0.0995048501103007	0.514725293398984	0.40847598738624
CCDC74B	14.4742800777707	2.22331052180862	0.00851451566338541	0.0260319021851783	0.0239754620910225	0.0160309810029602	0.113081076282057	0.0767766521043422
CCDC78	97.0368129187907	0.88907646977312	0.00316198334248721	0.0108656075410689	0.26193924049869	0.257563764717538	0.469348080509612	0.496941084840653
CCDC80	14954.189177248	-0.480574223472483	1.06782492374061e-10	1.35752269803074e-09	23.9928924690579	21.4952649432777	16.1719518251918	16.5514608790428
CCDC85B	947.532663521459	0.700003921148246	1.43048029230312e-08	1.37023055489716e-07	3.30430648857505	3.92032956049826	5.52756169747892	6.22163303839512
CCDC85C	2695.22485630518	-0.735318567488548	2.26483999960378e-18	6.37174986555196e-17	3.57172237511597	3.73888026722864	2.26662597088992	2.13556374664405
CCDC9	693.715508905196	0.769318048514701	1.38260643848577e-09	1.50894806131292e-08	1.57679622291025	1.45766464976307	2.57055833674618	2.62851742450978
CCDC97	880.514885326057	0.335437783881286	0.00389309290990566	0.013056041387922	1.24784029102156	1.21788402794631	1.49334970915662	1.63142196362778
CCIN	44.8375146104728	1.60954121929568	0.000431821054998994	0.00184483280864587	0.0638769816904407	0.0768794034923229	0.20085196027453	0.227930862338735
CCL2	503.502306081218	-1.18528592445496	3.28744162886642e-11	4.51562506561832e-10	5.2586019707982	6.2656885375479	2.05053853191786	3.04032997304885
CCM2	2554.79202432801	0.359737761460312	1.45136046372522e-05	8.41246400797923e-05	6.43156870345068	6.25653482059433	8.05688482711559	8.28647188180916
CCNA2	1507.06132136844	-0.930326312102709	3.11662166751091e-13	5.31399734824083e-12	3.65280163191165	4.84428912322402	2.06804021701978	2.39910518076547
CCNB1	1483.40709840628	-1.16896941793048	2.48386877066916e-21	8.92078826572243e-20	5.12316827490719	6.54858546083545	2.40420352568484	2.79829613656955
CCNB1IP1	685.77728975226	-0.602320032028423	5.16184521769529e-06	3.20993665768427e-05	3.23901003480377	2.79084546325378	2.02245326075456	1.97006078969823
CCNB2	614.19679642271	-0.970783802685972	2.32198499471874e-11	3.2303659377076e-10	2.86445375818387	3.60557012779921	1.59982022496137	1.70444450901934
CCND1	53176.5123216412	-0.515601684745698	1.21071858123888e-16	2.90114143315159e-15	87.8484893433847	91.7385116391993	61.8776303942785	64.1425109661633
CCND2	2317.8759292023	-0.603888572851549	5.84969788815297e-12	8.74691046425393e-11	2.71746901113498	2.55628600718966	1.69487627083561	1.78987889572507
CCND3	1651.95747215423	0.518717331075733	6.64415262951005e-08	5.70936046521077e-07	2.55214913084284	2.73823119033997	3.66211628623942	3.93728983374687
CCNDBP1	1448.88466563586	-0.526257768381556	9.38515820955133e-08	7.88602453094601e-07	2.9855121211708	2.77836079397843	2.01676485085424	2.00201355647909
CCNE2	197.176232937999	-0.964725265366474	2.85476082742766e-05	0.000157650041767652	0.503099185048061	0.675829933537122	0.277373352054653	0.327005556593174
CCNF	980.192383849499	-0.961574980938405	1.39232227041704e-10	1.75245732660941e-09	1.5087393166408	2.21298786645309	0.932428304857218	0.97939021124822
CCNG2	1481.3804838036	-0.630582937025715	1.04850300658626e-09	1.16524196606134e-08	2.13467969240394	1.91018773638853	1.35277592865993	1.27061104771999
CCNK	2794.51310238507	0.404593420527016	7.65531486409924e-07	5.51043002097119e-06	5.50793001068552	5.85622316731662	7.55314837304353	7.52757293024961
CCNY	6084.93851265076	0.34698299925636	8.85552334883714e-07	6.30131666114913e-06	6.28190308614483	6.57972182353116	8.19311706344423	8.21273359121189
CCNYL1	1933.75453720999	-0.514160750378029	9.79969780437829e-09	9.57408418290129e-08	3.60184676826483	3.55628451563734	2.57567538976507	2.45201523995538
CCNYL2	373.04757675717	-0.470272780897637	0.00506151604624764	0.0164656427782857	0.854332886810279	0.758308247733168	0.625825537582778	0.542871384869991
CCPG1	382.616123680884	-0.716611550426056	7.37516761535448e-06	4.46922801804808e-05	0.414110855286042	0.396380043226316	0.256640309340122	0.238180578163454
CCR1	72.9751317713121	-0.913087806692787	0.00976526318616405	0.0293363413731865	0.187839144420527	0.251193970267237	0.103907676814109	0.12942705145919
CCSER2	6225.83688089021	0.529484244483972	3.98312923862595e-13	6.69377205677051e-12	3.86742160458647	3.87580236055186	5.77553841206885	5.4352823464298
CCT2	4658.31051250194	-0.42129098156459	1.25710726486221e-07	1.03568186376283e-06	13.564319049464	15.2155037794255	10.8017108242998	10.7410747773422
CD163L1	621.299322458311	-0.977243830499412	3.66107455477038e-13	6.17989384845239e-12	1.12781385937016	1.05431430976043	0.526264897624675	0.588077003459445
CD248	12536.4589850403	0.468242816728672	3.15294234038221e-09	3.28078767363606e-08	23.4276583986444	27.2124837135582	34.2407885432701	36.0001959921432
CD27-AS1	412.945014142317	0.42320913223077	0.00657714104189197	0.0207820147064107	0.963398096040633	0.870591673350834	1.21954799629191	1.25373099377203
CD274	977.802517389036	-0.790673999515207	4.69161212065031e-11	6.31310640716736e-10	1.94671022457875	2.06649307408402	1.25835033853522	1.06449723065706
CD276	6132.94940258969	0.821417318087714	1.97000492636147e-23	8.45432622635126e-22	7.1530097180942	8.13830937022296	12.9743509521476	14.1150193260322
CD36	33.3150829699473	3.42172737935791	1.62530091072348e-07	1.31338145934634e-06	0.00800433782911078	0.00458745411785466	0.0782020826809628	0.060680549296257
CD44	90267.8217316124	-0.890555170790832	1.42759687136066e-49	2.43685973816979e-47	107.637061571001	108.499534265509	58.8911290284861	58.0654059969342
CD63	21448.5915310582	0.357955820467388	2.14626356464651e-06	1.42074231259738e-05	59.4567426202397	52.8256854844648	73.5044073881571	70.9203346004618
CD68	3194.9538085656	0.631820776983439	4.57868939502156e-13	7.66073230056912e-12	7.73365603871038	8.90232794068177	12.7684572542804	13.0565299821585
CD69	217.750280341862	1.29836748485129	2.00464261852815e-09	2.14771020174046e-08	0.422102601384129	0.505052421788965	1.0594641304302	1.21957866400999
CD82	2552.78321692785	0.574839663327988	1.69812984790406e-11	2.40652879191776e-10	7.69192183589021	7.22394619918453	10.9478051943886	11.3657054526929
CDA	20.5974763442817	-1.93373223542056	0.00354305270851406	0.0120399119643901	0.194128741539926	0.224990945755137	0.0508674868109243	0.0592055914981099
CDC20	1095.11645618141	-1.00958777197544	2.8359447902859e-13	4.86271707156021e-12	4.59306978945603	6.17693297849585	2.46532283121375	2.89317636776728
CDC25A	290.809218912199	-0.754362609267105	0.000125067097462421	0.000605873515513107	0.514067504793977	0.700888966068351	0.347502073417231	0.372290702265111
CDC25C	160.125062052125	-1.03476635249502	3.04747204314823e-05	0.000167440127593157	0.441880826900551	0.59091942542935	0.2600436972638	0.243019371483876
CDC27	6123.21850501051	-0.363424544363194	6.15372597561102e-07	4.5097638698255e-06	6.96140398693519	7.48735100191748	5.68499226069103	5.57627122320557
CDC42EP3	12279.8916039785	-0.842750671027795	2.72106477596182e-36	2.47535425607257e-34	16.4505456999192	16.4524841826271	9.41810310869853	8.9845810147225
CDC42EP5	222.865964068128	0.702796790184972	0.000711746486439384	0.00288265865688806	0.318640214684179	0.265446776910408	0.483165480012396	0.474744454251202
CDC42SE2	2102.24202597474	-0.401180972450595	3.76713722609331e-06	2.40060187662792e-05	3.93624165767883	4.11984372703674	3.0168468485952	3.10136734153815
CDC45	256.695185157606	-0.843503444231142	1.1568248228746e-05	6.7986393458843e-05	0.910042077401254	1.04884736072849	0.531824114157206	0.561482067562514
CDC5L	2010.54055354965	-0.388398386181439	2.11866322869117e-05	0.000119653277956417	2.0820569104954	2.28240178157388	1.70266495750954	1.63837483099894
CDC6	593.403432177114	-1.09016563357293	1.23201103768568e-14	2.42758906414018e-13	1.48382692531779	1.77499313395906	0.77654808542138	0.755058430139373
CDC7	279.312070316617	-1.10748449889064	3.16550271714635e-08	2.87965971729865e-07	0.585129986628074	0.792204294799092	0.311404349272781	0.32753434736742
CDCA2	981.944127485037	-1.26086115969487	6.33481720493134e-22	2.39996366526975e-20	1.94165447949817	2.43891597833238	0.853934017937457	0.977878513026879
CDCA3	304.96255030923	-0.906567572814864	1.46394825533224e-06	9.99115089622977e-06	1.09621676834446	1.36989183479481	0.608853352954995	0.708655472429716
CDCA4	844.228303148507	-0.329460447968458	0.0147558265794765	0.0419245403769231	2.04915430276939	2.67601926574255	1.84945721410759	1.9118940895134
CDCA5	532.11351767394	-0.495345397754717	0.000573363147274185	0.00237927695530987	1.40687068416	1.56889328071038	0.990409319969983	1.12630593587179
CDCA7	327.381015488833	-0.990347312631731	2.94694684141743e-08	2.69212365693407e-07	0.872324293464197	1.03659974349426	0.449626948099082	0.513226092906
CDCA7L	926.087203975191	-0.787585316410079	4.63398673124904e-12	7.03995264211354e-11	2.39258976932493	2.48232686910546	1.46905714070545	1.36098903427238
CDCA8	728.62165188232	-0.794338459696779	2.39325031010533e-07	1.8799513294271e-06	1.93458479392614	2.64717323727468	1.21071780162849	1.43429951290908
CDH4	367.733803410417	-1.88970333055251	8.97367838243305e-29	5.70410552242355e-27	0.275851852210667	0.308997936737175	0.0776157832463317	0.0805595183193382
CDH6	1327.56912342455	0.49718888594812	1.51691059817389e-06	1.03247785875707e-05	0.759505957416451	0.822996012637874	1.15879114243394	1.07846048462965
CDK1	819.353427561652	-1.20480156921813	8.70853916208072e-15	1.74079114408329e-13	1.74124744002764	2.50361760207905	0.864489718890468	0.978815816910945
CDK15	2190.42293366126	-0.56672030299867	2.68029249347162e-11	3.71523755116978e-10	3.34708514848143	3.37389385256642	2.28273715572368	2.26922953727625
CDK2AP2	449.96255379157	0.389706089911122	0.00830322473299961	0.0254782044321814	1.31865710085735	1.35611847086745	1.76572593328154	1.74799473285953
CDK6	19070.2182578819	-0.726066788877941	9.83474631541883e-30	6.5244308307355e-28	12.1506624044671	12.7246331952946	7.58604060539886	7.49769100506332
CDKN1A	14914.0624323655	0.583275149887965	1.18807980103002e-15	2.61963836534805e-14	29.2467967117181	26.4538907926687	42.0205274717797	41.7449757162979
CDKN2A	524.193438037693	0.446328105872839	0.00410774607643311	0.0136972955208893	1.20947437552775	1.42172223374152	1.60806617412889	1.9836836280604
CDKN2AIPNL	416.023854938971	-0.553986158758881	0.000369169357038065	0.00160378063257715	2.33082980163285	2.52799451251519	1.57160252153726	1.74771695591877
CDKN2C	535.344432390329	-0.944713816019086	2.99515393357523e-08	2.72959679417366e-07	1.454996745796	2.04955898043173	0.834686602788975	0.9875459212398
CDKN2D	186.154334109231	-0.613082881533356	0.00767875158757689	0.0238169853243095	0.837304683116973	1.11388092715884	0.62391492712615	0.650375294884753
CDKN3	287.514455860094	-1.15777939062287	4.07020680974831e-09	4.15296195364549e-08	1.9584587158492	2.611263693959	0.992946641238605	1.05498172615227
CDON	55.3744333903704	-1.54897716273302	0.000112606912389741	0.000549541989407306	0.0626987677723703	0.0623732102576569	0.0192338767281129	0.023785824499598
CDR2L	1788.14034189034	0.766515539097101	3.88704263996344e-15	8.01247649746603e-14	2.15168970980816	2.4663571254342	3.87024402333	3.99680977943706
CDRT1	35.2581603254995	1.43553236323897	0.00452916463110384	0.0149288498754024	0.0312337289147814	0.0307766524473608	0.0827031223975441	0.0857312648493028
CDS2	7130.916338219	0.485395336165427	3.73826838634143e-09	3.84247451456691e-08	4.17947748949158	3.6602244879016	5.62956854750817	5.38975368318334
CDT1	372.646580770875	-0.730609188256099	0.000152472146117209	0.000723635377635937	0.874590499720493	1.26884865053175	0.587206661392142	0.704685976295335
CDV3	11864.3197603672	-0.587484745145099	6.20518875105143e-19	1.85569345484199e-17	19.7043077797876	19.0833483550166	12.9218125306222	12.9798396127217
CEACAM19	896.813951266461	-0.472432930203857	0.000283408745488391	0.00126820196213833	3.16631634368175	2.53243384628584	2.10274378720082	2.02815232580471
CEBPB	1399.72028359565	0.577325504509111	1.56889977442193e-08	1.49340384542719e-07	3.33969243970691	3.2108785544554	4.66539271412192	5.15284032907348
CEBPD	1262.15758514214	0.575019692884974	1.08957432757981e-06	7.64211135022733e-06	5.06472213862675	4.90227228210081	6.66803220994138	8.25121494520205
CEBPZOS	1710.46415071133	-0.489284896906245	3.40182434476966e-07	2.61938750358543e-06	3.04640939678383	3.16230936598268	2.10156452694343	2.33708092076011
CELF2	1761.18967692525	-0.784647223990416	1.87941943330856e-12	2.94960124285369e-11	1.09893387866079	1.29375565825861	0.635453729692254	0.757438209411733
CELF6	38.767916874331	2.52157530196703	2.0001840221336e-06	1.33100287622662e-05	0.0208301497215988	0.0185705275506553	0.109162338129626	0.119115025692351
CELSR3	475.00121480654	0.87758199309815	5.12581129721484e-09	5.16730757978021e-08	0.167047224906778	0.177601433856793	0.298922816011359	0.336055332474959
CEMIP	28800.7891264847	-1.30352668420041	0.00159430816625347	0.0059046147395716	43.8995667991743	25.4005870760109	15.3397031424664	12.854151131106
CEND1	91.3780456807097	-1.39659851397673	8.60928707279416e-06	5.1655722436765e-05	0.520279180090663	0.468881845945027	0.174856213320104	0.203518321540374
CENPA	271.655022159378	-1.25411302836468	7.88907095789502e-08	6.69931615384802e-07	1.28108214661425	2.02095812856632	0.587158167563915	0.798629154064672
CENPE	1775.4301786147	-1.14675861924732	0.000192011247715841	0.000891241941735124	1.4017634949282	2.09610922695963	0.716298649011848	0.867325148190836
CENPF	4098.010385127	-1.07875047398496	1.65991425694498e-06	1.11878515490276e-05	2.81110585363243	3.84306750701061	1.50335112363412	1.65492681529049
CENPH	213.891896631666	-0.739767723107192	0.000572013078496276	0.00237432313893864	1.09905658583274	1.27258751499597	0.635675125497007	0.788926228481689
CENPI	954.479498319495	-0.422444096711731	0.00162751679049362	0.0060144089226901	1.47581038036524	1.94408737379714	1.2207861160851	1.33298984970015
CENPK	558.851945694439	-0.824214220017916	4.6465252258314e-06	2.91333104543255e-05	1.98250939947322	3.10662074840035	1.38652250531628	1.48587564978333
CENPM	125.446673845413	-1.01026016520693	0.000298383929041504	0.00132856056565021	0.505536912886205	0.715236633343014	0.296607895202047	0.308358378199247
CENPN	781.353137421321	-0.68306179364412	3.04826637954423e-07	2.35550675676683e-06	0.992763483469218	1.24316376047923	0.680207663279453	0.713605317854541
CENPO	1127.83963992151	-0.405454345059666	0.000290846338022288	0.00129880586926355	1.64830986527725	1.92170676903663	1.32211651999358	1.37752655191512
CENPU	566.94839829446	-0.961524206564815	7.39206589291026e-09	7.33988660425443e-08	1.50882440712169	2.1121016548942	0.858944392682459	1.00196756905919
CENPV	316.093133470639	0.638445988238464	0.000301394302910949	0.00134078543186622	1.39680410486365	1.21201010727134	2.05353442674583	2.0340630289406
CENPW	182.779118553058	-0.67629076796851	0.00865738683703489	0.0264474202349153	0.29025920965966	0.402688512467389	0.1732624466968	0.26131020143548
CEP112	629.961123840186	-0.323284159796496	0.016022728645366	0.0449109397749817	0.978804182102249	1.12483659228539	0.865754208971732	0.816653235630072
CEP126	427.141530350408	-0.374908188555982	0.013238648761929	0.0382578565705203	0.420990648970505	0.421648624852862	0.336474780697058	0.315076091945143
CEP128	441.56573842532	-0.67649142745552	9.04679354343362e-05	0.000451211055521483	0.627944266507307	0.87511579865909	0.460785018118819	0.478990105558771
CEP152	738.953601393743	-0.478933251115475	0.000200139545002578	0.000924732350267386	0.861987402496045	1.0187517320287	0.661156408846564	0.689959927957794
CEP170B	3691.05761232224	0.429327235063871	2.5489279470851e-07	1.99501872087155e-06	2.6827356802482	3.006300146773	3.73779820537515	3.94112148223335
CEP250	2684.98446085411	-0.338505989833571	6.27373813571981e-05	0.000324185815502909	2.15796816059935	2.27397258251348	1.69166888246448	1.82442797997281
CEP295	1153.74197081174	-0.370112697764033	0.00110561925111586	0.00425444976265251	0.90955493551415	1.08324710643449	0.781699337255233	0.761606626854496
CEP41	815.29510622913	0.607392488224273	2.50588975463487e-07	1.96335622240397e-06	0.423768404462177	0.416689707940757	0.652316370109627	0.632602357378525
CEP55	1004.10172057362	-1.12447280534366	2.94347423101934e-14	5.54804721062602e-13	2.61487081406075	3.76844858184096	1.39665316053897	1.53373666264566
CEP57	1278.98262057757	-0.413984209388741	0.000111314325769448	0.000543932852071228	2.68295119128437	2.90274362836665	2.21804818692446	1.98071552964856
CEP63	794.950202997843	-0.367566101817555	0.00207924009176073	0.00749236609915299	0.807111667264641	0.828270521720448	0.658335267166329	0.612156665480375
CEP68	820.621062382077	-0.38745580680773	0.0010197951064256	0.00395969238225992	0.974991900085199	0.978233505449772	0.775584259668414	0.721592133636678
CEP70	649.288123755629	-0.333107917799746	0.00982528499801173	0.0295108204210744	1.14565823468793	1.2610447052764	0.966421839976532	0.947068941118834
CEP76	274.083372753397	-0.691003889220618	0.000152576240152486	0.000723903260586059	0.653742815823588	0.664211400916598	0.405872980733657	0.4131280391249
CEP78	765.690950650792	-0.608579536938346	6.25107676431046e-07	4.57448738937401e-06	1.43182247474545	1.55355925863349	0.94647668301627	1.01676677541918
CEP85	460.762572629516	-0.403123157198884	0.0115727381849793	0.034052496321171	0.698669404430101	0.891478334845132	0.581593685547273	0.621098382492032
CEP85L	1592.07777049599	0.432666693185725	4.05836158909981e-06	2.5753813392483e-05	1.03466057468786	1.03901472469147	1.42530786586398	1.38221610939965
CEP97	909.547235729874	-0.703394986235651	2.70672732515531e-09	2.84768708613293e-08	0.841348195552976	0.963309907420353	0.565624236418762	0.543942617649923
CERS5	2810.91898370598	0.434931793880258	1.30642740688046e-07	1.07514870884767e-06	3.51265880094941	3.37389953410061	4.57201974815946	4.7749503659919
CES2	1426.44932975314	0.385070343179	6.44651638769712e-05	0.000332774301603448	1.81754785566966	1.80466712164358	2.36655566446748	2.38027889313974
CES3	16.100105914837	2.76645741230402	0.00119238817815219	0.00455946670085277	0.00430947831335161	0.00768398564740655	0.0327471221226532	0.0473151352055728
CETN2	894.042794795539	0.400133356500383	0.000462832450875782	0.00196406441164941	4.38992190853417	4.39523979031655	5.97578518183036	5.65153003844342
CFAP97	2566.46177055313	-0.700443103103652	1.41947949161412e-16	3.38535831029853e-15	2.9779246401384	3.22215943312801	1.92421867687516	1.90040378232969
CFH	1700.91336379791	1.30967339821484	1.21835228152582e-44	1.69809246430645e-42	1.37871785271588	1.37142019495336	3.3907615604331	3.45081447803295
CFL2	6309.18549419746	-1.07376967422069	2.84518347778372e-50	4.91182129482844e-48	14.5022161950229	15.4638352477961	7.03825650677289	7.24026593703489
CFLAR	4937.30709557922	-0.545159191494566	1.46960948535041e-12	2.33051224440955e-11	2.33788589471864	2.18974044351079	1.51606644950754	1.59910357084446
CGGBP1	4380.99340198799	-0.56921184538959	3.33657314459862e-14	6.26566368513501e-13	6.77660979472382	6.63170827902274	4.61316115499929	4.45337459087256
CHAC1	3182.0074513136	0.692190990478625	1.14556244066949e-17	3.04254975500891e-16	8.29657315439234	7.89027718204001	13.2864114858325	12.9677760501763
CHAF1A	713.809851506213	-0.60321358775387	2.50726576600982e-05	0.000139935273759078	1.38852087372937	1.78485448247805	0.980599764891611	1.11076632094925
CHAF1B	346.336235030244	-0.482825913668548	0.00393177030542143	0.0131688740781904	1.0211137732382	1.16160014710158	0.78128129643975	0.782287974789813
CHAMP1	2259.09724841035	-0.505759476009394	2.93037879417535e-09	3.05757655502142e-08	4.19832131379716	4.34932103271277	3.05621666540623	2.98018431488637
CHCHD3	1367.08700947246	-0.424512862724215	1.49368944964772e-05	8.64132906285154e-05	3.56598447908852	3.6479527821021	2.63163218952927	2.76137713882131
CHCHD4	177.728582413161	-0.820671839512066	0.000382116233369686	0.00165482035842425	0.835673400614017	0.905407286383939	0.437942422608566	0.552206565491473
CHCHD7	599.396392240888	-0.694852488414715	2.8080144605943e-07	2.18541781174942e-06	2.23273579839274	2.09834163192676	1.27287423947578	1.41675547431135
CHD1	2293.31764480617	-0.421419218826037	1.07546062243795e-06	7.55009139375108e-06	2.42382626622778	2.58330432761192	1.9045875785361	1.84306997164406
CHD1L	3687.38905479674	0.336919276827992	1.299371032597e-05	7.57775229451577e-05	6.76568077712331	6.53653765132668	8.29972412074972	8.56570350815154
CHIC1	989.735081557393	-0.912618655691135	7.52072857032592e-17	1.84878492621992e-15	1.12520005192565	1.1759297873359	0.617180160066756	0.608337452643079
CHL1	125.514207665313	1.64539656677232	1.74245105867901e-08	1.64827624429959e-07	0.0407722115039626	0.0300276871995396	0.124486331367828	0.0994780218376545
CHM	1607.97743469427	-0.85729987391095	2.29672370979264e-19	7.07744961443607e-18	1.54270400412299	1.63965921500952	0.899334882634124	0.86119802035639
CHML	2904.1824641964	-0.417829283512514	8.06506330633483e-06	4.85437566362277e-05	2.85955171230015	2.9279182446226	2.34313382361435	1.99920843008432
CHMP2B	1196.41406061046	-0.391011371522506	0.000223779088670589	0.00102337504969404	3.00600870843649	3.35674386706568	2.45765836695661	2.40248540404552
CHPF	4189.10446344786	0.514732011674061	1.7172229995864e-11	2.43131890118514e-10	6.46161224384302	6.91123217896145	9.43076158341603	9.72701450831945
CHRM2	3802.65574403221	-0.553321764939722	1.68905688367273e-07	1.36272714693341e-06	10.361533972542	8.3489489260358	6.80124647780689	6.00057133464822
CHRNB1	240.450928855211	-0.70252742996694	0.000698252962035956	0.0028348099944549	0.64933953084231	0.858134400409588	0.468402513142892	0.45664832992822
CHST10	121.503175774224	0.805265892981367	0.0030595220945376	0.0105733074750262	0.186995723309553	0.19481892131967	0.353814204950842	0.314328999123217
CHST11	99.8710412874025	0.822696187565312	0.00808094609385647	0.024916933845721	0.0667042690388404	0.0877636918257877	0.119248451787212	0.153560910375923
CHST15	1238.42684401555	-0.661370451376744	1.2579587389558e-10	1.58992588703964e-09	1.37543962648578	1.48827165298328	0.893537618374515	0.921644295206038
CHST2	1036.15690066719	1.2288479298539	1.29773689519484e-25	6.46400620059019e-24	0.841520174198202	1.00699774198645	2.17083670405937	2.16023271395422
CHSY1	3709.79332348985	-0.450676561740792	1.47143956152308e-08	1.40591885651941e-07	5.98606427624446	5.59934567308597	4.29602533726742	4.21281485153443
CHTF18	484.089402238096	-0.442950842980659	0.0043615915699468	0.0144612176190816	0.992100483166925	1.23272018289074	0.779879236463694	0.85810361712631
CIAO1	2036.09362096414	-0.399796351645744	4.93169214846857e-06	3.0731036554362e-05	3.50413120654727	3.55923129041467	2.62039648757271	2.7516869513013
CIB2	62.4980617215093	1.05885707489929	0.00482535327307162	0.0157682871422895	0.141037472073325	0.149918321372477	0.289962460656818	0.317640068512936
CIC	5143.36160646388	0.453453408929414	5.01564524782183e-09	5.05960707867923e-08	3.03953183155097	3.37564293883908	4.34553603286352	4.46036270973197
CIDECP	209.099234178725	0.741090781361157	0.000399527189504781	0.0017228546871861	1.22876482518678	1.16781271283872	1.96828667894684	2.05758969038431
CISH	157.493082814203	0.847779304352496	0.000711033928469467	0.0028805406510155	0.29003473093033	0.321995589034179	0.61730207219714	0.483165137284421
CIT	1830.46426976171	-0.944237131866077	2.86189403358e-15	6.01353999421125e-14	1.49653909273946	1.91076050997866	0.815086051724727	0.959777845970645
CITED2	8930.39887831803	-0.594234165779487	9.13324225584032e-19	2.67861421526498e-17	30.7790798761815	31.6856062668994	20.4252686615616	21.0832845262735
CKAP2	1894.72333696519	-1.01031011611177	5.43259432767507e-19	1.63106666059367e-17	3.16380474926105	4.0486165302451	1.72795147312759	1.85891046800715
CKAP2L	965.004427889831	-0.90436433321945	1.95795794906044e-09	2.10065657924621e-08	1.33598327064822	1.90095611518509	0.791471115572198	0.940177128035562
CKB	517.426459381597	0.335388979580476	0.01763913590995	0.0487047896662961	1.83445447215263	2.03198731564751	2.40898369637908	2.47674287989665
CKMT2	38.1367953522468	1.32049610733364	0.00721774142251509	0.0225807099857597	0.0867131966817772	0.0756261041846817	0.174856213320104	0.234563489232973
CKS1B	365.392390531462	-0.769562449994282	4.90294647005059e-06	3.05644492297942e-05	2.89462621255253	3.24224277511999	1.66301999494351	1.94790881300865
CKS2	734.863385922116	-0.96019725753208	7.05294279396494e-11	9.23692301085478e-10	8.42195190380714	10.9930890768611	4.58518370034426	5.41051643487102
CLASP2	2260.66942364641	-0.450392884332321	3.66060836480726e-07	2.79176517460602e-06	1.99551024982235	2.19280426376231	1.5089026414056	1.56389622136153
CLCN3	3076.37310192332	0.534074181193069	3.88636552349948e-11	5.27628820670278e-10	2.26395913336237	2.37550260743305	3.28284984696842	3.45487752882077
CLCN5	577.434257985489	0.514430057709946	0.000178489220969644	0.00083614191950997	0.283666789203912	0.266164243249331	0.376233768607738	0.413339894459519
CLCN6	1664.60532748358	0.469700814616697	1.25754690315714e-06	8.68788201580868e-06	1.57098151268781	1.43642607659578	2.12630372443887	2.05706446261649
CLCN7	2754.38164142299	0.403973792494627	1.09662697674447e-05	6.4749152859316e-05	3.1968048686606	3.71536888605884	4.44762747724821	4.71583884254313
CLDN1	2651.1977519943	0.729846224955304	6.5952014277473e-13	1.0878859944662e-11	3.29697562179289	3.82000041982252	5.43921232645141	6.39165522858132
CLDN11	2010.55519700915	-1.52664300278496	2.96759723245053e-57	7.04433393052946e-55	6.69836729905715	6.14493089360071	2.14135394941777	2.33745704667195
CLDN12	1199.83711946241	-0.414494488800851	7.55890705710922e-05	0.000383294112188262	2.21194795175261	2.39629622274908	1.77473523914532	1.68908834194567
CLDN15	316.099995406577	0.46927423478542	0.00651770612502771	0.0206242431683859	0.721780004139959	0.732238632282271	0.982594820541789	1.03739066493502
CLEC2B	1178.1313146881	0.570958989886798	2.94673180939825e-08	2.69212365693407e-07	2.87749660883654	2.84631719575081	4.28936213808656	4.24303930822889
CLGN	333.256534867916	-0.398378739792551	0.0178471218942305	0.0492075273715334	0.798246103456822	0.855748763028679	0.641321483521331	0.615666819542393
CLIC1	15198.3379811493	0.341466506660125	9.94284377458679e-08	8.31782393301335e-07	6.67089752352231	6.61664303805525	8.33197390927731	8.56061790743056
CLIP2	7077.58955884408	1.0771313314889	1.65922888627426e-53	3.4063520594971e-51	4.90718118724152	5.16599203320626	10.5859309086723	10.7269186628201
CLIP4	3811.39416590643	-0.536305229720289	5.0979014841298e-12	7.69854069054671e-11	5.4867456396507	5.26827869892975	3.78102404739553	3.66055257568724
CLK1	2013.28767118105	-0.352194701553338	8.29661283319644e-05	0.000416668238551803	3.54772066019765	3.77969461639852	2.93540123936155	2.81795676095183
CLMP	10201.9918170048	0.322994987299055	3.89833545050649e-06	2.47900846228944e-05	18.6190463640245	19.1361666522986	22.7698484099551	24.6153988677601
CLSPN	896.194366772596	-0.699021201109135	1.73738241644628e-07	1.39800390204724e-06	0.646939052174994	0.831037132719622	0.432585425309556	0.478933346516883
CLSTN3	1491.5527259329	0.592238885234458	1.0067151739724e-07	8.40792574106027e-07	2.00497347855963	1.64646960828687	2.7084814070571	2.83039564423142
CLTA	4299.514985278	0.387655339563428	2.24600484473879e-07	1.77253535591022e-06	18.7223820937726	18.3632336612536	23.8660412089876	24.8289617268079
CMBL	383.77992484753	1.04061458459232	2.3054688276188e-10	2.82913428345597e-09	0.357280989299662	0.408065775967535	0.805196996810473	0.768827104304044
CMPK2	328.283575651968	2.09720218260612	0.00661845642228033	0.0209038648580629	0.106168930784836	0.263958793709465	0.524258704911992	1.06031507810079
CMSS1	313.140400396798	-0.458532823770895	0.0116299580100143	0.0341943723801311	1.52394300078614	1.91655993053096	1.23550820871451	1.26756482305922
CMTM1	57.4036851569636	-1.00336404645663	0.00895839496057931	0.0272300792799361	0.427401570111293	0.415677506221063	0.213802689868707	0.208220451888567
CMTM4	1522.34548668646	-0.543487857868508	5.51979569547372e-08	4.80554362209953e-07	1.43195517414154	1.3045641174052	0.963979295824676	0.921237399025345
CMTM6	3517.92673849788	-1.22409164637265	4.60699256947676e-55	9.99849015935585e-53	8.92868597713875	9.08764848010927	3.95211810563047	3.78183718826717
CMYA5	87.048080054992	0.860619833818211	0.00929791789937754	0.028082299945794	0.0288813935986332	0.0302543524249423	0.0624341977623845	0.0449222195870471
CNEP1R1	1242.34670735977	0.32343905646027	0.00198998947424948	0.00719807621257096	2.97836808245578	3.2904038124994	4.00780918283483	3.84803589223746
CNIH3	630.069189032941	0.469978023317393	0.000278118427528939	0.00124599680065457	0.918827766413996	0.947743010238517	1.31298251996765	1.27893421416498
CNIH4	1061.87035084748	-0.779096666712528	3.13196886381708e-12	4.82075693810629e-11	3.66175066382967	3.28315750389189	1.99767710503709	2.06943975192051
CNN1	3446.51420780881	0.415564789967994	4.47377138679363e-07	3.34970600828826e-06	9.0840550408989	9.97758287272677	12.3923462013142	13.0964723295425
CNN3	9765.83750356352	-0.439558014917773	1.6794659244888e-09	1.81856352992401e-08	31.1177484057166	29.3428843525002	23.0669401606332	21.6640452977964
CNNM2	901.318851726014	0.804462639837816	7.73735005137144e-10	8.75248116012174e-09	0.942226188654442	0.86290196603926	1.73878310025877	1.42580224067598
CNNM3	524.052209116045	-0.375691914233793	0.00782171882337686	0.0242060607791284	0.718269762170011	0.764709751451827	0.598362442444282	0.5462992421213
CNOT1	11116.2372754931	-0.419127323517278	1.56793057268921e-10	1.95727208383686e-09	8.65236182236382	8.52454436705833	6.45036907947658	6.43855512627309
CNOT6	1913.41811041341	-0.554397651938937	6.85719109854166e-10	7.81503729700261e-09	2.18181875687111	2.2406633104197	1.5472882894409	1.47209279740109
CNOT6L	1898.57567001284	-0.391348413215538	1.29752878475045e-05	7.57282262694155e-05	1.49173576215265	1.49966436635273	1.17098618662569	1.11634897682996
CNOT9	2650.83194907919	-0.415879452481639	3.31845945185821e-07	2.5577897510213e-06	4.78211347767129	4.88500723630925	3.57708790203195	3.69249375523428
CNPPD1	1636.86416341745	0.554990605710348	2.87358049676231e-09	3.00216373075998e-08	3.09811957229153	3.08606107419041	4.45472497811556	4.6640742072999
CNPY3	724.412452105694	0.400364860454519	0.00139503097285106	0.00525106802268416	0.943323003875128	1.05267613491786	1.28946242098206	1.34912572290443
CNRIP1	1072.38533691255	0.533404524562442	7.90592285802255e-07	5.66541415373012e-06	2.41032551754378	2.25055697274992	3.37591140842051	3.40128696849749
CNST	1970.92486365797	-0.535024707409168	7.4239433863256e-09	7.36672422763282e-08	2.46262985026378	2.69812301205089	1.72630482005663	1.84498413626906
CNTN3	2234.65621508739	-0.516274335872723	4.57484083260129e-09	4.63958490846988e-08	3.34179266758579	3.20071319678024	2.35872957924419	2.23118551460603
COA1	1326.80409279535	-0.457895278808808	4.42414808893979e-06	2.77963845190956e-05	1.54440631737494	1.61699125967	1.1226613433	1.1860833692275
COBLL1	1819.7708811821	-0.700864033259053	4.52838420717514e-12	6.88640769523571e-11	1.3092971431453	1.53490743119729	0.899258877069022	0.852923310315029
COG6	1000.50274578438	-0.336942761745108	0.00205212010251446	0.00740693955747199	1.00193986584682	0.959593239736082	0.790399415155642	0.768389690362022
COL12A1	127488.270363344	0.327430205890965	2.59909344875841e-06	1.70269200834574e-05	62.6717467838037	57.4960679712624	77.3887936902508	73.9047782998012
COL16A1	10261.9860588205	0.740671185407663	1.07938692699403e-25	5.4478558787021e-24	8.70946801935899	8.22142429970797	14.4650972224939	13.9261051241159
COL18A1	12680.8625291071	1.35976586084277	5.17333966971617e-75	2.80690629508314e-72	6.55704967973082	6.31282536694479	17.3495455792526	15.7891559582015
COL1A1	673138.352018397	0.405285749858953	7.90532457681444e-07	5.66541415373012e-06	648.284558448465	553.959177572485	828.351073174293	769.387685525155
COL23A1	704.437209163346	0.654393896754865	3.09781111336352e-06	2.00178419541551e-05	1.21357610642003	0.980780616620981	1.82991922656142	1.64606621204892
COL24A1	656.070137518053	0.80570475994689	4.59595976474227e-10	5.41674326966366e-09	0.450625572310588	0.45323693803318	0.764750405059358	0.82109957710594
COL27A1	4547.40605175236	0.666359643507965	3.3454409711159e-19	1.02056102877897e-17	2.74288086533588	2.79775786765572	4.48781170466447	4.33142497651425
COL3A1	143931.961246575	1.26153032565186	2.45855195955563e-66	8.686121248737e-64	100.624199201196	89.2541540728067	230.999717409111	225.836433099456
COL4A1	61328.3617838334	0.697790719072419	6.06356916691432e-29	3.91990394824521e-27	39.0246560439004	38.2069950366936	63.8359915225661	61.8420369799309
COL4A3BP	3243.64836557316	0.429688613595976	9.28654185734565e-08	7.81180198764092e-07	2.94044802937067	3.11681496854931	3.98382784406357	4.19822865740013
COL4A4	18.4865243817596	-2.24185701168166	0.00187667478192569	0.00682884869150062	0.0186031439810478	0.0176551106258949	0.00283039859887882	0.00494152848099977
COL5A2	70071.9207353308	0.624756589969808	3.85408480930807e-23	1.63095421791109e-21	49.9487565382731	47.9504654483304	76.4390862437741	75.0192734192739
COL5A3	1801.51228266089	0.417629639577591	0.000189083404130371	0.000879802473368635	1.4956276921906	1.57936148146403	1.8251738720015	2.29724407664764
COL6A1	221035.817661807	0.553295970239943	1.46467167286597e-19	4.62604824411222e-18	265.202255818954	256.641119494758	381.505787484749	386.823907973911
COL6A2	198904.392121819	0.852557831829641	7.47629322083728e-44	1.01410577331214e-41	202.178093235017	199.69068281456	355.681088856813	372.400407959123
COL7A1	14247.3377330682	0.496043561100132	1.10664609053829e-11	1.59659709472533e-10	7.500381686414	8.37382637436905	10.936960697905	11.5141580195758
COL8A2	110.572112191807	-1.39175647776197	6.99312071461322e-06	4.25581970047424e-05	0.260051448286943	0.17388110441639	0.0925285643415124	0.0738842428882786
COLEC10	239.161180752262	1.77552857934399	1.04818287634029e-17	2.81342654723704e-16	0.18764015625337	0.174067078844546	0.617913177091516	0.627946986438438
COLEC12	439.536599687519	-0.582742222324866	0.000125000387352453	0.000605743503878299	1.0672765436155	1.00092862179236	0.659972368127339	0.728296784402307
COLGALT1	13309.775289955	0.375058431433872	6.12895867425107e-09	6.12976564708508e-08	18.9684937218142	19.5121414661503	25.1186751046345	24.9398115959755
COMMD2	1372.49904509914	-0.38286359138075	0.000141523350220203	0.000677385865326188	2.42095700874307	2.63252617631751	1.98426192740575	1.89860415753582
COMMD4	1119.30685916175	0.495874013393175	7.84785604473928e-06	4.73865775165656e-05	2.50141448427098	2.68963913410265	3.45437108345961	3.88658505074918
COMMD5	562.421546918267	1.33625493975936	2.98859309665905e-21	1.06829897233987e-19	1.15810870828956	1.04491838550905	2.81613444000403	2.77986393012168
COMMD7	1788.38976983033	-0.3460179811281	0.000130384706920791	0.000628427813306046	6.54012382273668	6.34887806270489	5.0824072435734	5.09547609906169
COPG2IT1	166.4128199584	-1.26076294566813	2.26378663662334e-07	1.78378872321482e-06	0.464478498107453	0.373164838229143	0.188221506825441	0.163070439872992
COPRS	851.18468059432	-0.436221342045508	0.000142094381775567	0.000679690758165748	4.7309411684947	4.877308784617	3.50109472619687	3.62221130760366
COPS2	3486.81558195383	-0.498835605382753	8.28711512513077e-11	1.07513110999989e-09	6.01833123285434	6.21796797676114	4.35451071314746	4.33023325995305
COPS3	1300.62107250308	-0.328676658699605	0.00118141565693327	0.00452206265057451	4.3992816108308	4.18734631839105	3.50759635752777	3.35470009226211
COPS5	1342.00384176488	-0.372935686422866	0.000253864187124786	0.00114680485602134	6.53489407205027	5.97462137215676	4.84543045403824	4.85798379464605
COPS6	3710.25490907831	-0.364568839890862	1.68205330662254e-06	1.13270185435326e-05	18.0725911583082	17.9950855456317	13.7958692633162	14.3160657510419
CORIN	262.512459869836	0.913994907412644	2.21770610010889e-05	0.000124968067777649	0.253125147247389	0.165350127239681	0.39062214016568	0.407692819139748
CORO1A	31.4709596704331	1.39040588715594	0.0145113797178368	0.0413848095876435	0.0353140902656438	0.0772771241518797	0.171607374542887	0.117492317116787
COX20	1387.50477389193	-0.51523344134772	9.58752519501437e-07	6.77774233423259e-06	3.5078416259814	3.9688114488546	2.50531168892395	2.73861199084989
CPA4	3838.09021616784	-1.6446285400992	3.37132059960669e-75	1.96988855958557e-72	12.2460779266053	13.1653924057226	3.75951537089065	4.39793929791522
CPD	12114.3061928828	-0.555352692721785	5.55373688958995e-13	9.25135645029063e-12	10.1522472947169	9.11163146034998	6.75572373966744	6.39987560771468
CPEB1	99.0990678670682	0.858201250611761	0.0054507431337339	0.0175663321356991	0.0665372221670574	0.0506842701498315	0.116525758603353	0.0978668106043607
CPEB2	4728.68773271984	-0.756659019472891	2.18260002356274e-19	6.75316895274239e-18	5.02525093613027	5.5947270204416	2.98698063038361	3.317486930168
CPEB4	2556.85129531331	0.674677982491868	6.07548662563167e-16	1.38586776000896e-14	1.4330182761937	1.39036899334129	2.28080909198156	2.24254887587405
CPED1	15808.5597542103	-1.0781633046206	1.04966985514838e-58	2.70281092193461e-56	23.3915439236433	23.7046640376623	11.5007704390817	10.872607955104
CPM	114.826488947744	-1.16426721126383	4.05317068680626e-05	0.000217198479978697	0.147621737049689	0.143123657732247	0.0732526599021606	0.0565586807988114
CPNE1	4195.60171486275	-0.470934810493266	2.22254861571816e-09	2.36614986475055e-08	11.8405005061027	10.9513880734394	8.20077656799562	8.30847300075052
CPNE3	4427.38727946376	-0.359508944740142	1.16419716637632e-06	8.10562940036163e-06	6.28090740997294	6.30803889784957	4.99450653198767	4.84802643314983
CPOX	1246.35537770789	-0.644848854799281	1.61101618588629e-10	2.00775700541301e-09	3.44300114549766	3.46468615304325	2.24911841619579	2.18184078622376
CPQ	1819.08811826577	0.330785711915221	0.000645371520862059	0.00264557046544425	5.35551628178689	4.81146027916622	6.57517206004895	6.26919472318477
CRAT	2228.02295243898	0.378266354844261	5.48500913605864e-05	0.000285664239955443	3.94865539614156	4.37963043727365	5.15062155501994	5.70159765388201
CRCP	1577.20650231913	-0.401291763282842	8.23268464177765e-05	0.000414142202244656	4.00830136164053	3.54320328942882	2.79039924707503	2.95642705916723
CREBL2	1519.78503992225	-0.593640590290932	3.6258225780038e-10	4.32366535361333e-09	2.9832033038704	2.91640808521552	1.96381450229015	1.9596134675227
CRELD1	1095.89849003486	-0.603610517929798	1.78158726644943e-08	1.68215498768799e-07	2.90097975429991	2.72507632170932	1.82130420484287	1.89784445433564
CRELD2	1009.66045899614	0.429090912323265	0.000143003538227883	0.000682964398855075	3.19815754064939	2.93461434464431	3.99870345914611	4.30197438008234
CRHR1-IT1	163.899620295612	-0.955838942997286	4.86703352253588e-05	0.000256024838207635	0.0821319974365589	0.0722589931433135	0.0407766672005654	0.039220997894908
CRIM1	42836.509573135	-0.891736042905146	8.39816688403651e-42	1.01257897858955e-39	61.9669034045694	60.1290022126071	33.9639009254249	32.0521883650654
CRIPAK	583.649145620854	0.391759514094921	0.00407391861374631	0.0135994224522158	0.710932978742785	0.687356123273747	0.964000126711049	0.876655847428033
CRIPT	1166.2350753681	-0.578530701547802	3.90198832517325e-07	2.96098934245914e-06	1.42712375134705	1.27231159145748	0.960159371255899	0.854437314362653
CRISPLD2	1474.44521590459	0.947435711423003	1.53482600854992e-15	3.35015470142103e-14	1.51321006210552	1.18087906689409	2.67561761313292	2.55371817121732
CRKL	3815.2652838656	-0.542905569395818	4.91305030703327e-12	7.44158128259715e-11	5.35025981384038	5.10545651443684	3.67536267502208	3.52611047041869
CRLF3	710.65205322524	0.444361349402805	0.000358561362251769	0.00156306003309293	1.20694698984748	1.31492563639128	1.71342139431424	1.72400200225406
CRLS1	734.625151275828	-1.24731369097519	1.88712516020868e-23	8.1446606346279e-22	1.43398010451645	1.38895076412788	0.569573581398042	0.625126936167745
CRY1	1020.3455455677	-0.342563948388407	0.00137555579019035	0.0051828977094672	2.12129948888914	2.14143862304773	1.67493477086357	1.69782907750416
CRY2	1180.95067391694	0.521803089541867	3.90795657157742e-07	2.9640377551375e-06	1.36387885081897	1.3679183240438	1.93541820290648	2.00049431542243
CRYM	57.8426605794149	1.17081518627216	0.00315875748263774	0.0108569782072924	0.127377011340117	0.154369743731092	0.287872779111881	0.345986235627665
CRYM-AS1	203.668956826978	0.79887572759527	0.000341568211428071	0.00149930779197205	0.347451689013973	0.450233534027728	0.7346929769328	0.648118779118002
CSDE1	17926.667890403	-0.614125522807072	1.3193320311606e-18	3.80328125567207e-17	32.1303831927324	29.735260684123	20.5126106754	20.0467854090553
CSE1L	4470.85851396604	-0.488411481669783	1.20593097473453e-09	1.32661139523295e-08	8.34434768604101	9.37865722145492	6.30654596593633	6.35721303787696
CSF1	4569.58165950896	0.407062839978878	5.14156114355611e-08	4.49169619855689e-07	4.99987164477237	4.83570492079474	6.41856918984316	6.67244486544997
CSF2	82.3432015857369	-1.22915463527856	0.000322022313747707	0.00142296771101081	0.735191510476493	1.07830300499147	0.36042692374487	0.412274553893144
CSGALNACT1	555.719668072556	0.611833920137276	3.35714329950147e-05	0.000182867411280123	0.591739784610489	0.512831749285476	0.78558156176119	0.914352643506097
CSNK1A1	11610.8904559042	-0.377624979237762	1.26983412439759e-08	1.22484571541894e-07	29.2320471277158	28.5421990521648	22.5548747850882	22.061210804974
CSNK1G1	3349.52326164792	0.382617797030426	8.35999567706055e-07	5.97952233172805e-06	2.14091139755214	2.17628269978996	2.77627379807249	2.87041348583675
CSNK1G2	1899.29624899502	0.488926471450792	3.62902930344813e-07	2.77325015985835e-06	3.15197380769932	3.55209700155112	4.54558798617894	4.88206167802956
CSNK1G3	2446.2350171529	-0.511033001147698	1.7363086228819e-09	1.8774377650407e-08	3.6503045853541	3.82006638091034	2.6872269061392	2.56807939414629
CSNK2A1	2845.25723973165	-0.408312284573511	3.93467876489265e-07	2.9813286681421e-06	7.13343264957609	6.9467998875524	5.29445519405712	5.35348398616509
CSPG4	27169.8664810656	0.396237573541838	5.38039058497973e-07	3.98426116415327e-06	15.9842241510248	18.8637861981794	22.5967973971559	23.3906851272481
CSRP2	825.053840452562	0.668564020109135	8.52946533190434e-08	7.20687638055009e-07	4.28949503363206	4.20779383057981	7.24593847417642	6.29911572487626
CSTB	4539.22544597776	0.826534011757221	1.77521787058897e-28	1.10983991316821e-26	21.03318828205	21.8326555601269	37.3025999887075	38.947403209217
CTAGE1	9.83735310939782	-2.76638701250942	0.00692758188879725	0.0218031539371468	0.0258868314906312	0.0230786683639372	0.00452207831765251	0.0026316645305533
CTBP1-AS2	663.922432223703	0.375174624609412	0.00315864900886749	0.0108569782072924	1.17759068832827	1.25188648076655	1.54836810450714	1.61032944802038
CTDP1	1056.18165595227	0.500789650774103	4.40387243910063e-06	2.77033664988889e-05	0.790157280031434	0.868840501840704	1.16190346436556	1.18976256840249
CTDSPL	2042.36331805166	-0.57901781305565	1.37917613970717e-09	1.50628640650118e-08	3.50887300891562	3.24869599250352	2.3816088816475	2.15769761354976
CTDSPL2	1731.89533831316	-0.523638233447012	9.94413169882546e-09	9.70894914965015e-08	2.57062061327573	2.58802438218765	1.82957220945557	1.76951227847185
CTGF	32948.3865212292	-0.35912091351391	2.44421349310427e-05	0.000136616966104636	105.657593163363	88.7532809820446	78.302997170367	73.8188808518391
CTH	84.126695683923	-0.822054647951554	0.00991210180527322	0.0297421786738516	0.292883423314887	0.325743541090057	0.177803259272465	0.172457034861434
CTHRC1	4553.92253580041	0.430668947428913	9.63115004524158e-08	8.0704043842973e-07	16.6171193010246	15.0865485115008	21.8076250340252	21.0965769623572
CTNNAL1	2941.64598155763	-0.649800251740145	3.83785204533829e-15	7.93260520718085e-14	8.49508819839038	8.55463987311424	5.63982180551957	5.25756151567244
CTNS	912.352038929849	0.540942704383684	4.09219791919454e-06	2.59360328695884e-05	0.974753226082942	1.09188551636946	1.44881531313036	1.56328950442245
CTPS1	2451.29811003947	0.330553297539834	0.000375607036879031	0.00162802342489764	3.57604543575866	4.15174933351034	4.76264844305795	4.97259930479365
CTPS2	1149.82729009592	-0.645147420345246	4.80808033027256e-10	5.63613860937506e-09	1.73758165594337	1.76758193292585	1.09845988051795	1.1505503740547
CTSA	7809.88270409016	0.432470749153286	9.00779936338225e-10	1.00993718028416e-08	13.3878717444386	12.9926508686267	18.2464201341372	17.4747107540272
CTSD	13140.3238465714	0.69179254588413	2.10962598742959e-26	1.11282770836911e-24	28.7862595850385	29.473495960415	47.6904732228707	46.7035820684833
CTSF	189.904880103489	0.61489589389984	0.00685284327384793	0.0215902934500825	0.517650940201599	0.395568834122697	0.709687314624687	0.701974299872152
CTSK	22797.6388227593	0.509945110771311	1.08285038457035e-13	1.92630714782116e-12	66.3558708940962	61.5066966059423	89.9635626877878	92.7742623450706
CTSO	811.154635510365	-0.744711694697374	6.18514305500667e-10	7.10776802508784e-09	1.11185422068852	1.01859311957438	0.648651508426656	0.628179803922606
CTSS	1545.15401055885	1.1172228411339	2.75180937790494e-20	9.12783582295455e-19	1.30096508206132	1.62660265932682	2.90054658577536	3.45618226483366
CUL2	2176.61197189753	-0.788739199728916	2.60920018050163e-20	8.67373504205267e-19	3.52913220496263	3.52406013133729	2.05429577259398	2.04170070020306
CUL4A	5090.54856304224	-0.546882935826565	2.00607812769662e-14	3.84802259039988e-13	8.28938797812006	8.26177212492583	5.648889873345	5.71824571269486
CUL9	1942.03919439265	0.426206726506272	1.30470829551096e-06	8.97449258315568e-06	1.31204232803048	1.31245757682611	1.77149115714105	1.76669149803745
CX3CL1	8.11541381790308	3.01332795909168	0.0157693359475085	0.0443397652627336	0.00187029800217791	0.0050022329711869	0.0176426473242953	0.0359355457257515
CXCL10	439.181869229867	2.07803189858487	4.26181023894437e-24	1.93848566317494e-22	0.683846163934479	1.0305134698841	2.9927065961637	4.21166960086447
CXCL3	23.3610333392403	1.60782838109832	0.0167045103758707	0.0464789233754996	0.0321814110867397	0.0932438707775177	0.147568469732815	0.225738588016216
CXorf23	1004.35511705433	0.327693810621877	0.0025452455569405	0.00896322913793232	0.845008243032049	0.843676058144083	1.0782818081817	1.04775475002359
CXXC5	421.690390340237	-0.634063057649857	7.43827282764391e-05	0.000377807558667891	0.915781774477206	0.803611592257412	0.518956594166771	0.596279117975304
CYB561	581.639413160166	0.417855733575156	0.00347532590140742	0.0118405810931109	0.982136675399241	0.809926318356768	1.18952395417921	1.22142939885898
CYB561D1	648.860020098501	-0.403311028649677	0.00144073936910253	0.00540170594654629	0.878441652704132	0.885066409648922	0.664047076514967	0.673807161042712
CYB5A	1066.86616879642	-0.867672858984858	1.07560698953779e-15	2.38549217300117e-14	10.1291738063984	9.5406219938588	5.3139469536803	5.51314638056581
CYB5D2	422.918477532969	0.60190283724672	8.23570228777139e-05	0.000414156865792198	1.01360996413137	1.05288258880947	1.60332184127888	1.53998711787968
CYB5R2	158.998344095488	-1.12817743266858	2.72675156341838e-06	1.77941622643695e-05	0.668779190884039	0.678039515473408	0.334993635071663	0.281756293855742
CYB5R4	932.016087436842	-0.522049874507136	2.50340879747631e-06	1.64355170489456e-05	2.95783259189292	3.06169382725235	2.0841407680289	2.12002127836986
CYBA	304.714170810918	0.462234470260736	0.0107602606904311	0.031965170201218	2.05996639708757	2.30710871969435	2.79332155167276	3.23549140326904
CYCS	3272.14765043994	-0.551330614012672	3.58107956490469e-12	5.48425007560807e-11	4.1931270678817	4.45354817111225	2.91740192395725	2.99987184423632
CYGB	498.588508669679	1.18313280198912	2.10694177665789e-15	4.52099710042185e-14	0.802207597388443	0.934849444969794	2.00217575014498	1.93978947657196
CYLD	2770.42317570961	-0.379278599087587	2.77330999661199e-06	1.8074699900699e-05	2.20104953010105	2.17717290098238	1.70695167590023	1.67013560725633
CYP26B1	154.025009345261	1.57013901265634	2.81511959048556e-09	2.94540611698737e-08	0.123949525500789	0.0837885002114042	0.299801087762717	0.326511819768044
CYP27A1	486.638778248551	0.883483543070995	3.03697618605824e-09	3.16445419880637e-08	0.971577805874508	0.861357030444562	1.74449081022131	1.65654559716676
CYP2J2	47.3367421383166	1.86670817074662	8.9645260916049e-05	0.000447401709538967	0.0724747301749058	0.0484595883164909	0.272988845885294	0.174064439004443
CYP2U1	979.231710231935	-1.01660660635617	4.81917186487589e-20	1.56104176910862e-18	1.73293264297502	1.66078871606446	0.853067664072877	0.830404519390735
CYP51A1	4430.40830521802	0.430582808435862	4.20940872042572e-08	3.72231299654876e-07	7.11724498670755	7.0089727476508	9.92403472894962	9.17464647252585
CYR61	25784.5842387872	-0.885662440681836	5.05575170591861e-26	2.58661278062169e-24	97.3391056932825	82.1691177277871	49.8413789047133	47.6708756900665
CYSTM1	620.010823646859	0.862822565978093	4.89632615117388e-11	6.57111191595703e-10	2.95961710627716	2.99118140190912	5.49466679648004	5.35960894174774
CYTH1	917.979963193444	0.594258714737868	1.85775260976471e-07	1.4854198761866e-06	1.16297765577705	1.08451335659198	1.69676242962353	1.7124248333771
CYTH2	1754.95942509674	0.448219256164988	4.44657565481744e-06	2.79142055156969e-05	2.08516264333804	1.8769807007088	2.78058002019758	2.64972973367436
DAAM2	363.603140283767	-1.22707949549428	3.02618384115019e-13	5.16559381064648e-12	0.528161169696981	0.461257537299554	0.214138223887037	0.210687954018183
DAB2	8178.43688768967	-0.708902163046983	2.02096767294268e-23	8.64860306685781e-22	13.8207526535006	13.3219368465734	8.53498054349044	8.12491676227319
DAB2IP	4856.52010585866	0.660528334141441	1.15935104533231e-19	3.66934605847677e-18	3.84052317903582	3.77412309187515	5.98103874274829	6.09791114428415
DACT1	353.777373002268	1.68657224390789	2.21413470917776e-16	5.18291748872549e-15	0.271893351384036	0.194044622796255	0.863788819167029	0.650918772635122
DACT3	154.611669086454	1.22189144043035	6.15223937429109e-07	4.5097638698255e-06	0.1992148207539	0.194791821175539	0.469801713449007	0.452735777666026
DANCR	189.817974169853	-0.684015961225034	0.00220288944043096	0.00788555522597247	1.6911300160184	1.67915307410695	1.16391949119789	0.936341623015546
DAP	12096.0542005896	-0.387000368762941	3.35810137158112e-08	3.03849172346994e-07	35.2254034008038	36.8268300000751	28.575540497231	26.6799178277026
DAPK3	3115.66166993158	0.65558034538002	7.52544083099145e-16	1.69122037136719e-14	6.25400447593717	6.64255611212948	9.92532568410732	10.4461986817498
DARS	2896.93547296897	-1.00258102127445	9.31025488391547e-36	8.22333675560719e-34	7.39881595657138	7.67045287572471	3.78573657385515	3.75703455601298
DAZAP2	4667.00209373113	0.332926606755523	5.71717909593903e-06	3.52927203679422e-05	9.11832486824185	8.8866396390644	11.2839509965089	11.4763086709032
DBF4	553.24504290061	-0.613839161454315	0.000170768401223931	0.000802327899113401	0.87994098266173	1.23195510866022	0.660497455887812	0.719354755876894
DBT	1031.41995189431	-0.920840571771363	3.17117919066332e-17	8.00274987783342e-16	0.788975225190585	0.74661483843927	0.41001169805986	0.404245815348583
DCAF10	3484.02535750049	-0.338693068598028	1.27765446018038e-05	7.46547855026626e-05	3.00410695350694	2.97055311393664	2.4083600355968	2.33134038619898
DCAKD	1061.47239188907	0.350148792405037	0.000967572348907481	0.00378459297749806	2.37335242740609	2.38038171272556	3.00646848754744	3.07391706203092
DCBLD2	15958.2142531193	-0.490654320796997	2.61979488719699e-09	2.76005020293319e-08	17.4395739224862	20.2380518880025	12.7363003610778	14.1577321354656
DCLRE1A	314.766381930481	-0.492947947067315	0.00436464991466942	0.0144650439580405	0.471179544320893	0.506586146090021	0.357762138687877	0.338023571615309
DCTD	3409.0398270886	-0.621730748930469	1.96374277326337e-13	3.42516420337739e-12	12.9188114233512	11.9806958196077	8.40902829960338	7.82993657623269
DCUN1D3	2022.57308649612	-0.675981963995259	3.45167780312487e-14	6.46583097226547e-13	2.56478573726042	2.42361122271264	1.5669681230061	1.56750663047406
DCUN1D5	1150.81363169353	-0.335715520899795	0.00108733736230556	0.00419366062659204	0.61258722190446	0.618765890590847	0.489529511250169	0.489260985156496
DDA1	1495.26932000281	-0.343448276325937	0.000332544796070298	0.00146392945288321	2.4703870384352	2.57896948748718	1.95151609708325	2.04022584477304
DDAH1	8305.0337280658	-1.07179312660624	3.62736761709562e-51	6.72036205352642e-49	15.1710018232204	14.7458837829181	7.34257450208063	6.93478417937402
DDAH2	1267.41479671155	0.363850629709008	0.000652447660208137	0.00266666259184343	0.472373951662	0.428260090780658	0.602118582548775	0.562004011137423
DDB2	1296.77741641594	0.507151452337797	4.8784425935781e-07	3.63122488396073e-06	3.63675195846217	3.49371866903511	5.15008255576952	5.02339260137088
DDIAS	299.976416859801	-0.847685147699312	0.000107066518566117	0.000524864327220538	0.508574078360394	0.826842575699038	0.350495971990715	0.390419583228695
DDIT3	709.745911321949	0.34612778723576	0.00662859674467624	0.0209295300013898	3.45577724441805	3.0644621877348	4.13693870389005	4.19811369413113
DDR1	2069.13011286836	0.515110715803913	1.54809946243167e-08	1.47452834064338e-07	0.426548437116056	0.426292910175639	0.636484316444373	0.585863251392385
DDX21	4497.52519889576	-0.75866643694196	3.91000554790573e-22	1.50381782996921e-20	6.6468789268383	7.21612106024759	4.20587395016744	4.00760420239514
DDX58	4862.26818630843	0.813726318975363	0.00175012544276101	0.00640981333809674	3.90266935970099	5.22944015645493	7.10804677401425	8.98828392673064
DEAF1	1021.82291019331	0.424454896187565	0.000127603881379249	0.000616393693454227	1.48970094285627	1.49815277329074	2.09239834245577	1.92840434223102
DECR2	329.789911910074	0.788416910469091	5.30156503803072e-06	3.29412581013344e-05	0.450820978326611	0.490163531696218	0.775025448054114	0.853645143064535
DEK	6256.131177818	-0.382220763693313	1.4172814373757e-05	8.22434667555831e-05	13.7708771583012	16.6002995259144	11.807229573295	11.5454862833912
DENND1B	1259.37483020217	-0.419583070390052	9.5130854341516e-05	0.000472296712142586	0.852623898132265	0.768988991738809	0.630969947587545	0.586375276038328
DENND2A	7733.95898468188	-0.342843720831422	7.11057431994951e-07	5.14154426790447e-06	10.8808461516057	10.5796349755871	8.34181650216205	8.63980666088935
DENND3	4658.23117008994	-0.542054845552232	9.13302843471784e-14	1.64589523108225e-12	6.28203651101543	6.20535133414298	4.28578248632586	4.31964669967908
DENND4C	4015.37792757588	-0.338092385537807	7.8658288440718e-06	4.74762303532534e-05	3.30771046937464	3.25727854168444	2.64542523121881	2.56498134504071
DENND6B	176.556492426276	0.96000656072828	5.382087431683e-05	0.000280688885211562	0.417628406837264	0.314407548324591	0.739267379606662	0.699112964852033
DENR	2683.9155952311	-0.464936873571438	1.48210960636869e-08	1.41522370458536e-07	6.8690741174522	7.20725107865783	5.0305234762548	5.19805952677241
DEPDC1	992.507965119475	-1.17470226090376	2.30647559558798e-16	5.39076573048809e-15	1.29978557381883	1.81753531786431	0.663821638290558	0.718340853727858
DEPDC1B	216.173544483549	-0.971421620938177	3.12888697449084e-05	0.000171603071900595	0.565051086197923	0.845115673840161	0.333135315281017	0.385474743687574
DEPDC7	273.270062717424	-0.717569425367654	0.000129058322875956	0.000622627513855675	0.893912351945986	1.04550607863925	0.578423875962444	0.602232475891218
DERL1	2291.76589386618	-0.682867658498978	3.91145579811767e-15	8.05187486246662e-14	5.06113390803008	5.34943436729809	3.33002327131204	3.17039738293628
DET1	468.425276901789	0.589691921257197	8.37420243144692e-05	0.000420287027877574	0.584999562793696	0.648961358801856	0.885756337960274	0.97468671666113
DGCR14	520.474450291678	0.411865899918791	0.00315122528141343	0.0108409000170364	0.495333766784371	0.494931745808089	0.645151876957306	0.677245827158685
DGKH	4490.93578858782	0.420835668566034	4.38046967346749e-08	3.86458160739362e-07	1.27240829183841	1.21896930114244	1.71368129894933	1.63326647976974
DGKI	473.097203980176	0.903361240023674	3.9878402428707e-09	4.08243052356413e-08	0.275569562968079	0.30669900598673	0.579289665621541	0.509954272005056
DHCR7	1221.67494549971	0.845729188658787	7.50214879302899e-16	1.688799148299e-14	2.07243054648834	1.95868109943573	3.72316791663452	3.55156459531812
DHFR	491.844065991537	-1.20212820914804	6.57971944135226e-15	1.32867994580382e-13	0.967998825432545	1.18855583968616	0.457058069582978	0.48124457150626
DHRS3	895.905940212191	0.48790913828521	0.000166364172633639	0.000783691321131858	2.38052756142124	1.90850768576428	2.92234545621987	3.13543106739318
DHRS4-AS1	420.143961962473	0.415083092016796	0.00782599538273326	0.0242143629031535	0.671960797586695	0.62416361027046	0.907969008652801	0.827495604297638
DHRS7	1446.63333671439	0.359096692790691	0.000236323017958252	0.00107266784846781	3.57396303895424	3.4298329466591	4.40483642865542	4.61673286911519
DHX36	2458.69307311258	-0.644106086115935	1.14328664964495e-14	2.26746877041856e-13	3.78301139693385	3.96046837333289	2.48770394712451	2.48099248919341
DHX58	560.775485606881	0.381187151679077	0.0161417453962615	0.0451778548378785	0.97534288526731	1.32334981880154	1.40656090126822	1.58501179503181
DIAPH3	2139.18677609405	-1.06609860620889	9.22472872505265e-25	4.39316861413793e-23	3.11611530003751	3.82780976608306	1.64411026602905	1.67813960845933
DIO2	1984.09249126317	0.789155281989165	2.83412143848763e-11	3.91774093662458e-10	1.39572199539683	1.13468486146161	2.39663190099319	1.99708044137322
DIP2C	4958.00140685929	0.333016779969541	5.03485552760125e-06	3.13610189320698e-05	3.41483585498712	3.42521250796477	4.39321469180941	4.24973326846406
DIRC3-AS1	213.933373899098	-0.989606056624107	2.20570837848877e-06	1.45945651942515e-05	1.70523493147012	1.59861729729614	0.778483895649983	0.895368564230103
DISP1	330.308744345398	-0.519010719787228	0.0030352099656998	0.0104964511265448	0.486470435762258	0.485383203852424	0.308106764294707	0.373601230055376
DISP2	28.6696461122907	1.55450888237712	0.00614303259392819	0.0195199646866675	0.0160352681427037	0.0197941669629078	0.056238349262517	0.0485283438005875
DIXDC1	2096.94541124571	1.4987759482153	1.34689807263836e-61	4.09241510390438e-59	0.889704453222752	0.838596966577183	2.46912333488801	2.43699036983409
DKC1	1384.75767319779	-0.39175100645919	0.000104233257614914	0.000512297524971133	2.14309603817278	2.13201296220856	1.55200492298391	1.71978957059389
DKK1	1531.72408321937	-0.959432242452176	7.43785109227875e-23	2.98930777232536e-21	6.65259300405702	7.14470182368718	3.44851688258942	3.6677749129993
DKK2	102.925404254359	-1.84114030216106	4.00948898373317e-09	4.1018287300252e-08	0.230344400361714	0.314880731616572	0.071087207922432	0.0811785657637543
DLC1	16180.6121468271	-0.538268471423377	2.21391299922333e-15	4.72384357924168e-14	13.2166907249407	13.3336006327744	9.47963827464365	8.85800685208337
DLEU2	396.385330312232	0.406831154147153	0.00918918445057888	0.0278091813094013	0.771222246135062	0.743525547616102	1.0133527425836	1.00305351656901
DLG3	1080.74128547368	0.909947518293386	2.37652508382946e-15	5.03401360130098e-14	0.727438922607626	0.632620204377163	1.31916899156553	1.25076045999043
DLG4	1431.74949411964	0.339636514937133	0.000493175589338541	0.00207831443917645	1.55846824984327	1.5163146049555	1.90709621409461	1.99964221794246
DLG5	10056.2240752946	0.480698682159244	1.86768484629314e-11	2.63452815087144e-10	3.55378976964331	3.35265886406338	4.95320095405309	4.71784849955928
DLGAP5	1002.2062200674	-1.33575344353268	1.93065796048384e-19	5.99806865760133e-18	2.47702776828132	3.25597679767538	0.98544539778192	1.29242120289152
DLL1	17.2844907998977	1.81411430847013	0.0145636344143758	0.0415182462043905	0.00562445507966131	0.00877506518042198	0.0243172712251559	0.0257302850060517
DLL4	1635.27743549557	1.92080225624139	2.55775094287618e-84	2.2857266073044e-81	1.20121037618474	1.25936480558021	4.53871546690159	4.80124108822865
DMPK	2649.24020030958	0.578032984836585	1.39170450402094e-10	1.75245732660941e-09	3.73846371319221	3.31500206715645	5.33901983801749	5.23952865644869
DMWD	2361.95214464582	0.476072514750501	2.40198607392243e-08	2.22370337812489e-07	3.56806044826858	3.78559404150284	5.04482913580971	5.21095830051218
DMXL1	3626.79728121432	-0.580939496988703	2.19461600957434e-14	4.20436398706852e-13	2.07048100926069	2.09275609102896	1.40553570814471	1.38632020798401
DNAH1	841.861923770344	0.630637186261482	3.59054793966643e-07	2.74799014102833e-06	0.334186730166726	0.284852557180746	0.48112145208404	0.483328978392853
DNAH11	403.443575276405	0.765637382120543	2.79149714879437e-06	1.81854308252505e-05	0.135313153258605	0.128995406723302	0.207119550320158	0.244747547393248
DNAH7	59.6379761737555	1.90080105101856	7.90135840692565e-06	4.76360530020235e-05	0.0165230280337638	0.00803489220513062	0.0460503842395203	0.0481015574947731
DNAJB2	1977.19722884445	0.458725984721682	4.19429766177873e-07	3.16384161259893e-06	3.24480962949881	3.31417062880014	4.34120061144039	4.70395718581355
DNAJB4	2283.25074480706	-0.447520676487489	1.63387092872382e-07	1.31960484578268e-06	4.22976221236214	4.46990306716517	3.15355222217114	3.24403126570397
DNAJB9	1184.8512422528	0.383576516562596	0.000293217118262495	0.00130747122413966	2.57957425281472	2.40328912801864	3.34438694018585	3.18342493605343
DNAJC15	1380.67616532453	-0.63690268045711	9.78342208192167e-11	1.25425947905953e-09	3.72651891269246	3.72485079466933	2.46194055159217	2.34393998323861
DNAJC24	495.720572684115	-0.402311924939916	0.00444304309670063	0.0146800153817042	1.17493616735218	1.13968875122334	0.878074557330176	0.880061514823654
DNAJC4	400.700523905857	0.645135545578003	4.66969664539558e-05	0.000246926667026974	1.46597210102882	1.31696832269898	2.18458162814029	2.19295365778872
DNAJC5	4216.64388764353	-0.615014113866013	6.15302929394063e-16	1.40145158970834e-14	5.82461044690201	6.03941238067539	3.77039172705854	4.00118165841949
DNAJC6	67.440997148346	-1.62539375785526	8.87828621547227e-06	5.31138854788074e-05	0.105063990272344	0.0932291170004959	0.0339620960992684	0.0305452138668888
DNASE2	1335.26655278224	0.403222913547263	4.32521514264545e-05	0.000230314295292919	3.52621775297272	3.52116346280758	4.71299424861814	4.63726026317566
DNER	61.2919643030889	2.14988390575552	1.31437495678181e-07	1.08110364609795e-06	0.0417250223004214	0.0431167409799463	0.184870356406109	0.192615403709728
DNHD1	1049.08724511103	0.380239969227033	0.000401750110738665	0.0017299851707318	0.365294248459304	0.349836969003226	0.46573044654311	0.468926786412373
DNLZ	274.478003677883	0.710621234536234	0.00026606037897371	0.00119703334911403	1.80377524283645	1.60441620317849	2.53015557630695	3.08873202621979
DNM1	445.998740082922	-0.389592767956124	0.0120712101829798	0.0353505932090493	0.828946441027279	0.700235090584325	0.579622811521764	0.595018379264177
DNM3OS	1120.15215319326	0.551242705623752	2.05165723211668e-07	1.62846273094653e-06	0.702688141620574	0.702944179019753	1.06122286368294	1.0046958959826
DNMT3B	488.928502507311	0.499429235213911	0.000825685673746288	0.00328975000145649	0.494575463624732	0.584314830829136	0.738577231447628	0.787291148215406
DNPEP	2752.23682561688	0.461771758995092	4.10316167463617e-08	3.64255066925552e-07	3.15522260663903	3.35016162918374	4.34383959975448	4.64124548534081
DOCK3	41.5743706707944	-1.50358067489361	0.00102178634434247	0.00396297629391135	0.0446551539220169	0.0417067958840388	0.0150441100627671	0.0155645447620845
DOCK5	6904.60560760213	-0.745144535499167	1.0901204137218e-26	5.87273380328424e-25	4.90355246664102	5.09520346682299	2.93965246330756	3.04448697535774
DOCK9	3246.29718649742	-0.484090213040427	5.86869883444346e-10	6.79034826297525e-09	2.86260323583846	2.92780192285649	2.03869263652526	2.11462846095839
DOHH	238.128641308767	0.756063133661038	0.000229148927637539	0.00104434348898636	0.488017039290613	0.572046620818577	0.821714863520957	0.970189956836599
DOK1	1026.72920268903	0.792644055849638	1.3754509632115e-12	2.19034077915191e-11	1.81114039249916	1.64051370705393	2.98962438552875	3.02137903734241
DONSON	585.206488431766	-0.370293090598633	0.00525316394456453	0.0170380159363417	1.56002431441613	1.66171521494668	1.23985767743555	1.25848503948843
DPAGT1	1104.48626837127	-0.475879249951994	3.76497246748791e-05	0.000203115986243169	3.9690657407003	3.40549078188421	2.57574002578179	2.7567361688401
DPF3	1461.72530493493	-0.886987764559249	7.27884077903517e-20	2.34279976938776e-18	2.29152688546786	2.38768576654976	1.23249851598806	1.30597736443993
DPP3	1872.16914585269	0.663305671983232	1.05055272619345e-12	1.69968019343247e-11	2.95487914244574	2.82635086738859	4.42249322041634	4.77356459758072
DPP7	1855.41069042645	0.39343117805197	1.06937503119247e-05	6.32630275462464e-05	6.02143656280401	6.18938628697222	8.07903409788432	8.00582621660156
DPY19L1	2486.16963727602	-1.10534340297722	1.2342212710104e-35	1.08383176584913e-33	4.36372547715626	4.22355443782465	2.09366184276054	1.90933347246825
DPY19L2	311.786545439941	-0.580355564688502	0.000920153797757605	0.00361681151242782	0.5613687697905	0.572747660777851	0.401606143220605	0.358274822162977
DPY19L2P1	14.0366331564039	-2.32747801670539	0.00468125910860127	0.0153535596670705	0.0551319187209161	0.0471852423550765	0.0104012622285024	0.0100885149692053
DPY19L3	2352.37493768979	0.584620592110422	7.8518487951477e-11	1.02478768810897e-09	1.92817298223755	1.81286936224223	2.91871787382061	2.71276499860162
DPY19L4	2422.56489374559	0.677028659799308	1.22354493671286e-15	2.69392676500605e-14	1.87642732334963	1.80244560345132	2.94773006225963	2.9573097981231
DPY30	569.114770920773	-1.30195706498378	1.20075353521368e-21	4.37454381462019e-20	3.64488406743714	3.86189712387427	1.5134149833502	1.53916704885598
DPYD	1500.5128147084	-0.636585434691303	3.34071916183142e-11	4.58466174404181e-10	1.9801500352631	2.02295699063453	1.32204561991189	1.25971492449025
DPYSL4	112.416412703251	1.16826893946297	4.11511301651909e-05	0.000219974654985778	0.157480605080771	0.155657936542535	0.33729315675304	0.369611427644857
DRAM2	916.715053681573	-0.571535633503261	4.11390269373273e-06	2.60627229871508e-05	3.83328781467585	3.31332157364629	2.54773017252923	2.28196431511076
DRD4	32.4028281592453	1.26694856631866	0.0153096308836964	0.0432151453707016	0.0432846279931351	0.0426511978666619	0.107449162668891	0.100049625104295
DRG1	1086.69120094713	-0.460706550411238	3.05524552608201e-05	0.000167806543862031	5.6150421985165	5.05934812227033	3.80162547809616	3.9940500339049
DSEL	10601.6786543079	-0.715772320617865	3.18791393484799e-27	1.81388720967081e-25	4.41837378302591	4.31879568269923	2.64723779046405	2.69086032369415
DSN1	555.574855113154	-0.411153544022186	0.0132668281277338	0.0383174245088463	1.30917739273785	1.79689866987028	1.056263262581	1.2812870940055
DSP	1741.81845913298	-0.356405382338094	0.000113965525339711	0.000555636797484241	1.21756399941782	1.24023105214653	0.989482184006544	0.935483400021982
DTD2	667.938857521849	-0.381314859567213	0.00253415353758906	0.00893037822849757	1.7198049373447	1.74888774414304	1.29187478905969	1.38080424411936
DTL	915.091441004187	-0.974242723797853	1.34899261086026e-10	1.70356573102153e-09	1.35533421063981	1.89550570462454	0.747062683828153	0.910278563754809
DTNA	423.198576504176	0.847799399786849	3.64065364199608e-08	3.27464832026078e-07	0.176444753912932	0.170198097308082	0.318330790492901	0.308053420598229
DTWD2	79.0563716269428	-0.870375139441227	0.00933104615508371	0.0281767547581061	0.115210356934159	0.096643141003331	0.0526927066752285	0.064204841696676
DTX2	787.157630820856	0.399737698824946	0.00364429794397095	0.0123430294798096	0.945177952441579	1.22736418384626	1.37333635285597	1.4923787845328
DTX3	636.990280144676	0.468463731716513	0.000475739681005267	0.00201265308655862	1.57365466152065	1.36824518624788	2.0522501227923	2.04269105215457
DTX3L	9898.62314023958	0.573798411674584	6.10506101873164e-10	7.02105124879418e-09	7.62389830832988	9.36644140545982	11.971744610036	13.3808219714709
DTX4	2096.24596385547	0.338063020309178	0.000104664744256533	0.000513919455315205	1.9791503682746	1.9123594754731	2.44659577527369	2.49168258988281
DUSP1	6193.98233041595	-0.539895635906975	1.07000405185809e-11	1.54519976766427e-10	23.5379276762374	21.0706731330949	15.1479429974203	15.6588785405637
DUSP19	134.121761981168	-0.619084998873857	0.0158001942796305	0.0444083408376228	0.193167445441714	0.179431448631331	0.12911523986837	0.114297139285037
DUSP22	490.188354412279	0.760906573560972	6.95598694956135e-07	5.04416962948621e-06	0.692270661783021	0.582448304366041	1.13708497913893	1.03674818367703
DUSP3	4493.01174058528	-0.493511851612039	3.72760463050334e-11	5.07470363688324e-10	7.65092359421934	8.03899249522123	5.48530321476274	5.6929680874711
DUSP5	2954.27758158163	-0.414453462013774	5.48694338991759e-07	4.05436011574066e-06	8.19891886704742	8.23305019145225	5.92407017186102	6.45043045777239
DUSP8	302.694397904499	0.549876550797271	0.00179323477625495	0.00655348153015763	0.1133008382853	0.111935726533649	0.161406754707089	0.169670191973483
DUT	918.714353486798	-0.551411899572513	7.70369486990529e-07	5.54140778710233e-06	2.81280366839195	2.92562096301256	1.96335255741062	1.96288140929649
DVL2	1789.19375331409	0.582506253350219	1.46355578062911e-10	1.83754871234029e-09	2.88677892109765	2.96067839560285	4.3088539285433	4.47485715054297
DVL3	5553.9828291505	0.442248705598568	1.2346375728425e-09	1.35524667677914e-08	5.7250848995707	5.72482736294018	7.98512421752254	7.6205222106676
DYNC2LI1	487.354943619875	0.45581118206631	0.00208921292389168	0.00751760368066377	1.37511535271492	1.23451802467424	1.86963763067892	1.72739346917866
DYNLT1	2391.40732733752	0.512230642114372	1.33842226982803e-09	1.46599215019664e-08	15.9240805904136	15.4901984240231	22.1414309793101	22.8362945305653
DYNLT3	2238.19027979791	0.341000486155503	0.000158571808444924	0.000749773704916056	5.16950705400892	5.80834416888888	6.93865574785578	6.9922204319138
DYRK1A	3721.19569553385	0.387924957800255	3.7065102405159e-07	2.82393698966487e-06	2.89674763941196	2.84348607352097	3.79399246422747	3.74303729121556
DYRK3	594.003713325959	0.381886375031891	0.00406895341666366	0.0135858330342757	1.44368476500002	1.36170693020914	1.81448892504466	1.85828571705213
DZIP1	2961.76831466642	0.473443760425759	2.39986673027028e-09	2.54068121019276e-08	2.03706986095922	2.03728708770886	2.82298254648268	2.85293021888308
DZIP1L	1135.92170525523	0.454628293654455	1.25166931147414e-05	7.32486909858055e-05	1.52402732677853	1.49245056611332	2.06658632065429	2.08288269792145
E2F1	351.15761278468	-0.927319959033869	2.25903700678805e-08	2.10032375808592e-07	1.00209735713136	1.09727315044966	0.552861758319	0.553061358180695
E2F5	200.037318978508	-0.924232319610256	1.362032961225e-05	7.92797116740622e-05	0.867922905066617	0.866029409814212	0.438223809318449	0.479514334197413
E2F7	6681.17918995409	1.11445321101264	1.72650023154414e-30	1.23140805247036e-28	3.96919391881955	5.09255111490652	9.79292155183018	9.85928408704453
E2F8	50.7280632862008	-2.01230227345125	3.47944223108492e-06	2.22848593485e-05	0.114108906876454	0.137963349356962	0.0270328019329189	0.0357545102309114
EBF1	300.009804050677	0.744608314977242	2.79244288485058e-05	0.000154376973459425	0.250606136990331	0.258617197190604	0.435376160948025	0.419842210232743
ECI2	1589.26331877862	-0.470147229280559	4.92770095825177e-07	3.66429921477048e-06	7.3023877149014	7.13804652728312	5.25963992806378	5.20135612189933
ECM1	10441.3369693694	0.35813344095312	1.99453861098392e-07	1.58977075435822e-06	25.1647263259903	25.3238817707518	33.3929843108383	31.5193876927487
ECT2	2748.54229424914	-0.790127048270414	1.33105471215724e-14	2.61596160246996e-13	4.23363149503662	5.30010594015514	2.71227474375321	2.81114989968043
EDN1	825.515123461233	-1.05196535786016	4.89269181516851e-17	1.22454322991829e-15	3.02894761452713	3.5052147098998	1.64232463500644	1.51138060456658
EDNRB	205.172406997555	1.16377293272866	2.90646013167794e-07	2.25625663364595e-06	0.169412370015674	0.13790132105494	0.380219118131761	0.313375020115248
EEA1	6027.11708358098	-0.370692870974415	7.90138583389033e-07	5.66541415373012e-06	5.14875769598185	5.30606908939169	4.2131779334598	3.8949407813859
EEF1A1	102394.624975843	-0.532096244806479	8.2194290073832e-11	1.06908874554936e-09	229.444674997867	194.639119676403	150.605843501074	143.715681461255
EEF1A2	20.4631513086877	-1.6636217277182	0.0113147771358152	0.0334099308546755	0.0834840641869011	0.107506884394208	0.0291670671758902	0.0311190724819911
EEF1G	11841.0877245774	-0.37378952198083	1.03546439281655e-07	8.63379531046596e-07	54.9470253358647	51.9937038714449	42.3685881260529	40.4424426145943
EEF2K	1635.88396931742	-0.407715682272256	1.44689993096753e-05	8.38981059208347e-05	1.54722597534083	1.55068884665282	1.20441059536654	1.13755492358784
EFCAB14	5463.70082182394	-0.763147644787538	4.4912477922862e-27	2.50849398751515e-25	7.26126546007199	7.41372040573498	4.34528736393379	4.32801805507955
EFHC1	941.911794436989	-0.481610354218193	1.319615977072e-05	7.69286489780421e-05	0.971150042445432	0.950413589679223	0.690539340623389	0.690643458826543
EFHD2	1932.7814585499	-1.2302623825381	3.15027504058616e-40	3.46804191424528e-38	6.63919761055548	7.15287262539482	2.84544394008745	3.05132744608076
EFNA5	1177.65580804871	-0.38586476978966	0.000182236847209486	0.000852249215222791	1.55402938301	1.52285505243035	1.15302719649417	1.21112556020113
EFNB1	2116.09069458933	0.708322990779483	1.03760674698687e-15	2.3079533968118e-14	3.04878119811599	2.88585579882058	4.84742861228821	4.89008316286785
EFNB2	2475.88761155749	-0.803429842649687	2.92463422253387e-22	1.12769144946027e-20	4.35682658203261	4.47566328814794	2.54306475269624	2.53282114239269
EFR3A	8948.79392315269	0.392709775140209	9.36584289310504e-09	9.17381594017097e-08	7.02849722707953	6.81584497179058	9.22232195160437	9.01532872777076
EFS	916.557749955929	0.777403879499031	1.82760938339346e-10	2.26468529792116e-09	1.43803976333225	1.22086710420909	2.33433994674849	2.25110854804975
EGFL7	121.100605203323	0.795562610848479	0.00341871618242815	0.0116634036028404	0.207740675097494	0.216431763895032	0.347492850636699	0.391192476359037
EGLN1	3493.75706028419	-0.650201271982648	2.72029077109525e-17	6.91081227332426e-16	3.63839714486018	3.76405943115708	2.37207841916493	2.35848981686958
EGR2	189.146382133645	0.588705868080408	0.0138270335686159	0.0396864337756305	0.312048752253316	0.275573678815909	0.515280241317518	0.371697646586473
EHD2	30161.0860812075	0.727726458110492	1.61071234765102e-26	8.5859445563208e-25	37.4589859142606	40.5488039034526	62.7400277779862	66.8379091849258
EIF1AD	822.860345163844	-0.569934183182956	9.07299778644378e-07	6.44625242262828e-06	2.03036098258584	2.10801280099313	1.39591339883259	1.39955743520894
EIF1AX	2759.52664928162	-0.874819250305374	3.35519568156822e-23	1.42380259202191e-21	4.65108543652507	5.27401306019964	2.6939597805699	2.73063109338052
EIF2AK2	7516.98899735981	0.374610363067719	9.82155414314013e-05	0.000485706544734977	8.24801418960459	10.3098750026874	11.4258595703225	12.6911280032181
EIF2B2	751.759285531413	-0.60204196186217	6.2935536663142e-07	4.60113894603683e-06	3.58405412484842	3.65659984098389	2.45017559800114	2.33228920844601
EIF3J	2429.80197133589	-0.36064991260809	2.14866392143771e-05	0.000121302498307252	6.34635542827523	6.80312092838955	5.15661889284336	5.10959067599196
EIF3M	3099.69653244791	-0.447304397927998	1.10995675803568e-08	1.07816260026075e-07	12.8081704289845	12.780969894406	9.37917493892407	9.45092316931778
EIF4A2	7703.9045010833	-0.607788572263283	3.88190147049922e-13	6.5381205254794e-12	32.5221963380935	28.0267887927977	20.1657745926533	19.7221500079102
EIF4B	10128.120128679	-0.496316921861213	1.80590845573211e-08	1.70300194037754e-07	19.506082030962	16.3261561848338	13.071252694589	12.4286825050687
EIF4E3	167.522356020983	-1.18792155800072	8.48516026907464e-07	6.06048682688208e-06	0.23513230856801	0.189896061348686	0.0877059777422414	0.100395264596669
EIF4EBP1	906.387148162913	-0.630012612463016	2.12325568315105e-08	1.98379460875958e-07	7.93224953528113	7.84464266979005	5.19053256629013	5.0366658477271
EIF4EBP2	5628.07502739587	-1.79911880439329	2.08105948695244e-135	6.32309114515629e-132	7.24308228642668	7.04469763157346	2.07603310482835	2.04313928679488
EIF5A2	1945.81456666682	-0.457160759500676	1.15795480744483e-06	8.06586402324709e-06	2.48136290039643	2.52243447212426	1.71974548583118	1.93909165267267
ELFN2	2365.01897760921	-0.674516701917792	1.41176796041768e-15	3.09936110616553e-14	2.05654776684667	2.01472530162581	1.29585646022371	1.26345944658158
ELK4	6767.70027554389	-0.851044886263154	1.28465591225272e-30	9.24952256821958e-29	4.57186650420049	4.47402934383257	2.6081259419306	2.42218985392722
ELL2	14188.7288161891	-0.543928922249041	1.65468631543685e-15	3.60659892455045e-14	16.6862772202822	17.581559035766	11.3983159402023	12.1811039117066
ELMO1	51.6951011373479	-2.72869412082408	4.05918260415033e-09	4.14708151461008e-08	0.0986193997506632	0.0653247198065574	0.0123168370336923	0.0126492266998412
ELMO2	2525.42029710431	0.654345083985077	1.27780588346857e-14	2.5145630805252e-13	2.97425226137098	2.80665167733391	4.52532636133037	4.61161073481477
ELMOD1	184.198287434544	-2.27803436159137	3.41068113855268e-21	1.2106324265629e-19	0.539794200759052	0.663471738023591	0.126361864662162	0.121654520963481
ELMOD2	1269.32072888278	-0.684134911595669	1.04907366894172e-10	1.33816349106319e-09	2.16895095406209	2.20031425710223	1.44276760005865	1.2826275708256
ELN	630.074152976075	1.29371590914477	2.2110998560539e-15	4.72384357924168e-14	0.628479057851127	0.491821196876764	1.55531252340304	1.20967727517323
ELOVL2	1351.05309223925	-0.660603041713183	2.17207451563436e-11	3.03570892746248e-10	2.53223379763765	2.46740268807515	1.5581948864972	1.61705544331346
ELP2	4202.62580964503	-0.378269912381215	4.35534249107296e-07	3.26908908717294e-06	4.92780286337366	4.78723671542629	3.76829588616573	3.73205304446815
EMD	1359.63065803543	-0.544282714742356	5.73853589149791e-08	4.98455330266646e-07	7.45233997321278	7.37524895746594	5.28258280694032	4.91455489498959
EMILIN1	7579.37860185162	0.560428813175648	1.85883138789008e-15	4.02270177276726e-14	9.26428237210032	9.91539006542148	14.2487372710199	14.1122324424434
EMILIN2	70.9692160069745	1.98644368587687	1.37194195238249e-07	1.12479989965434e-06	0.0479858099047183	0.0393303530767729	0.183738336183665	0.165703292164191
EML1	8394.22191866639	0.446756247835959	2.54834957465033e-09	2.69037711869964e-08	9.74506526065583	9.5967540746269	12.5170952752156	13.9420536012386
EMP3	5262.42227068375	0.355037570868468	1.70667559889839e-05	9.80628430350392e-05	30.150748271965	34.1805238479455	39.6380690378497	42.8533821843776
ENAM	51.7748068881421	-1.08130990145154	0.0108843333425244	0.0322643496857817	0.0667156459366946	0.0862924859803922	0.0438469847098255	0.0280188322683688
ENDOD1	182.990287533706	0.663662146036592	0.00297766134080707	0.0103209288363087	0.195703391890367	0.175063231498127	0.300404322120914	0.290363497532601
ENDOV	588.577815896278	0.553001356622152	3.35634651070336e-05	0.000182867411280123	0.885201239254736	0.86249192085184	1.25949745418116	1.31546784478626
ENO1	43630.6992482644	-0.712791435084567	7.06753131327968e-30	4.72995311503722e-28	100.368213587621	104.689190449933	61.4595205410731	64.0530279166595
ENOSF1	905.838146548241	-0.551042853084496	4.17271106280238e-06	2.64132610275391e-05	1.14626633353862	1.19811444999052	0.741395420251062	0.864932726369388
ENOX2	420.987112204923	0.393816725065443	0.0137152514676044	0.0394326457789262	0.567190771215904	0.480379660487971	0.71680955582379	0.667978379372792
ENPP1	1035.93037972701	-0.730637288197352	2.07742374179941e-11	2.91568112001462e-10	1.06151449687867	1.07608839582466	0.619442545818788	0.673678006770021
ENTPD1	18.3460147525232	2.03284761049154	0.00763618974496073	0.0237043307326202	0.00187425212057575	0.00501280851658053	0.0165749501157161	0.0107177141057625
ENTPD7	1426.55459651488	-0.790003116220255	7.44920942604589e-16	1.68155110847681e-14	1.28973039336533	1.31052598228147	0.728164952081716	0.781156013610181
EPAS1	31672.2202655726	0.721735156317366	6.15290727652612e-23	2.51954089878665e-21	29.9387116386515	27.0069338057559	48.2040155746879	46.0402093788953
EPB41	25.6535226568622	-2.15714502332918	0.000356375337228787	0.00155531574926163	0.0384647651109069	0.0435246739468483	0.008528307666377	0.00992625214102926
EPB41L5	4797.58748372164	-0.723787243667552	3.94888100158412e-23	1.6618116392262e-21	3.12363438579182	3.20103081542623	1.88248715644303	1.95965213463631
EPG5	14952.5323865214	-0.795194942297419	1.99292529218596e-35	1.73008691650795e-33	9.14524377507938	9.24307589637522	5.23393350180532	5.39745783965792
EPHA4	1590.09462131407	1.03582471470467	4.0277794503109e-21	1.40990841956505e-19	1.05322666138266	0.870005368044601	2.03612128668983	1.93069629508111
EPHX1	471.061161459562	0.774245803896011	1.47792420407045e-07	1.20518650071059e-06	0.923132750207707	0.877781217572258	1.50888871349054	1.58634309184803
EPM2AIP1	2135.32742046637	0.330595240759119	0.000128576745636225	0.000620895715100295	1.52993142175414	1.60083895098141	1.96858883444996	1.97910706688614
EPS15	4194.16711226816	-0.570415930159773	4.94974719889591e-14	9.10369969075383e-13	5.72237099896411	5.5274245542723	3.8470366850018	3.75483524177436
EPS8	2067.77801449046	0.472617626551663	4.56766787399336e-07	3.41832563259641e-06	2.73188408669615	2.48635855034798	3.74169992786866	3.53020518819433
EPS8L2	1400.36231123957	0.422366126146	2.2862492027308e-05	0.000128496847531951	2.23648341580012	2.45711403510192	3.14186004011275	3.15976528517063
ERCC2	2234.6522343005	-0.369113220398469	3.15286193669943e-05	0.000172792580498951	5.03144066763999	5.22409350379618	3.8034728776183	4.16398232553443
ERCC6	750.749647089114	-0.557077019075117	2.04694673167461e-05	0.000116077695959689	0.537558672905545	0.450878610912678	0.340512456642088	0.335040698334325
ERCC6L	376.373411992623	-1.05297465834664	6.02750340633465e-09	6.03304062557006e-08	0.628382785011269	0.860051143724934	0.351341138936486	0.365744757995062
ERCC6L2	2935.57394581578	-0.398838456826326	5.84539533938611e-07	4.30039932183795e-06	1.66879615149122	1.63107870759359	1.24677967042598	1.26508130178563
EREG	390.405028706471	1.26067859677999	1.84727974230683e-13	3.23316518953057e-12	0.304382513195413	0.306628882749145	0.660895932303395	0.809714500492948
ERF	1446.79358180355	0.574975360275628	3.78977406167435e-07	2.88159397121906e-06	2.25070867372705	2.73542400304265	3.50795149368477	3.92881958045299
ERGIC2	1698.55464036354	-0.460829814944411	2.65979382876086e-06	1.73945707475398e-05	6.36629021381293	7.27129032372142	4.95780232144781	4.96848859277427
ERI3	954.167092452588	-0.333717719802191	0.00238533335154066	0.00847473907310706	3.76228506699988	3.69777032385965	2.95193156025529	2.98934597811619
ERLEC1	3153.89745015048	-0.383552731426109	3.99695953207278e-06	2.53853717438335e-05	8.47929080746957	8.54297310568209	6.82606802572064	6.25835204314765
ERLIN1	2658.58019295543	-0.563304905179027	6.50994418924721e-12	9.68649090333435e-11	5.48968020029199	5.60085910360836	3.6777048413327	3.85297673899089
ERLIN2	3246.85768290844	-1.26866282131556	2.49066234008074e-59	6.63827057377308e-57	4.59329275796882	4.61264585856053	1.91470029344477	1.91851883190518
ERMARD	717.101653135983	0.389356186241643	0.00245457518341144	0.00868823536495492	0.911856131325559	0.804847353545185	1.09440985805854	1.16775968257138
ERN1	703.45531581456	0.402452226124341	0.00139410513512455	0.0052488835719485	0.886299899411099	0.978024600155297	1.25091215200179	1.21637111629607
ERO1A	8237.98350643203	-0.716263952475998	5.34738377342623e-19	1.60866246110676e-17	10.5874312490225	12.291477418625	6.87301142177284	7.0890296186811
ERP44	2787.12670084454	0.463434233782766	6.14188683821934e-08	5.30759640763528e-07	3.09261772644996	2.83220589405232	4.12700658284639	4.07742846890787
ERRFI1	17869.3775266122	-0.747729373618657	3.66396430583116e-32	2.83994621092791e-30	43.9551913444196	44.1457131317253	25.9125691867917	26.7287417671366
ERV3-1	1036.4077602631	0.427437129753209	0.00020962692082288	0.000964169597681258	1.7670708381018	1.560136118343	2.32707382513509	2.16960032100018
ESCO2	267.130336737263	-0.996330019517373	2.11250160024792e-06	1.39967014420789e-05	0.578430037341821	0.726569125302123	0.277467143885354	0.3787465260053
ESD	3414.81688981417	-0.33835350363095	1.15318124324633e-05	6.77984885735228e-05	19.3353855170592	20.0435992056998	15.5021738589052	15.7378396026053
ESM1	91.1371959472969	-1.4779357085063	1.6185791985041e-05	9.32478391493146e-05	0.303004391893291	0.488626449689558	0.123764564487259	0.160359577432004
ESPL1	752.835926060397	-0.783706091547886	4.94536853292491e-07	3.67563790372775e-06	0.745839713407239	1.02621757282863	0.463291976244972	0.567524436166496
ESR1	13710.2874771134	-1.24698975584744	7.98010943226804e-49	1.30358948919372e-46	11.0849529893623	9.59517371302359	4.57216268924356	4.17141643342396
ESR2	86.9588381565317	1.63556182649725	8.49950339658668e-07	6.06787855267598e-06	0.0478093125672289	0.0527460031728755	0.146571253791632	0.166222662971812
ESRRA	796.347773573324	0.456749082815338	0.000201466226254693	0.000930296325003434	1.67046391190102	1.64707112197844	2.14609088941686	2.42715808077442
ETHE1	751.669441595929	-0.42106829378636	0.000508862123130634	0.00213671458667789	5.56280720620697	5.29414789589931	3.99261251709106	4.15208509557826
ETNK1	2440.72787990389	-0.510868054923457	1.49610894354996e-09	1.62931090110474e-08	2.45983559286496	2.37057162466856	1.66790632068831	1.73536321238507
ETNK2	468.821948432946	-0.373412081732931	0.00965309205333083	0.0290338100325088	1.18637402979327	1.20819374326575	0.927215167768997	0.926820001379749
ETV1	1005.7580308805	0.720387458963142	4.49970017282519e-10	5.31153419002023e-09	0.578478911379044	0.647555365478221	1.05381209420354	0.967860267677231
ETV7	34.569182799137	1.39216389340971	0.00810557217116802	0.0249877947289741	0.0663705750933296	0.0369817491051652	0.149997881896866	0.126511056699392
EVA1B	1030.64119781513	0.743077793849091	9.22612342025742e-12	1.35423446377344e-10	3.74332709011322	3.87939439239668	6.23389835212989	6.56255224682595
EVI5	3937.18774487468	-1.06614757303982	5.79226175654127e-34	4.75654273542568e-32	4.60416410312743	4.21408125187947	2.22720034825769	1.99823091177489
EXD2	414.173156770618	-0.447691358948221	0.00329480642462021	0.0112786613796373	0.538221576155284	0.552119146629442	0.405913306401088	0.395637305499526
EXO1	303.108134437125	-0.938345239615919	8.28184905458768e-06	4.98091254304418e-05	0.559261241081054	0.860553123978183	0.384675451170065	0.354248499286091
EXOC8	1322.7138021197	-0.485404118132762	9.23973483017907e-07	6.55330745665368e-06	1.83321285170999	1.86083358373717	1.34430144748785	1.3018563455629
EXOSC2	817.114905363237	-0.439777659570215	0.000161951745029362	0.000764565230107544	2.23821981361593	2.1979320846863	1.60985944776901	1.67353034755472
EXOSC9	783.182876322426	-0.352301427443262	0.00398478699726997	0.0133311790492238	3.14057164091259	3.43760204620108	2.46580142315956	2.70076173217211
EXTL1	24.8403001288066	-1.5793568061164	0.00816049366093576	0.0251316074796141	0.0541100416026211	0.0599557624506161	0.0157988280536072	0.0226320527141753
EXTL2	1420.49789257539	-0.679338789047465	6.55517376484023e-11	8.60727742743757e-10	3.38807811026917	2.99019156777191	1.99641309001523	2.00542085515435
EZH2	485.78963700364	-0.762150020983016	1.72985938219683e-06	1.15924233499489e-05	1.15282803259935	1.32844874394294	0.81142521492413	0.650816879507483
EZR	6017.8965352571	-0.846032858402184	8.46145671036991e-29	5.40111135898906e-27	14.0136772220969	15.2189628411778	8.36796396104747	7.93534524245996
F2R	14146.8237525468	0.414882303462612	2.25583025062869e-09	2.39654357815042e-08	19.6008454719784	18.2478870114301	25.4811900473331	25.1598411498005
F2RL2	1362.36412910482	-0.964911072694528	6.59983535972007e-21	2.26843209920514e-19	3.38424123715171	3.07843456488225	1.63886764856026	1.68728338668342
FAAP20	1314.88071321543	0.627531837895974	2.78510283174653e-10	3.37679826176323e-09	0.902623684258747	0.916275725598067	1.38838702095017	1.43082268133099
FABP3	156.877050950458	1.2951596258011	1.56438414462468e-06	1.05909643160152e-05	0.499411376521939	0.327743173217251	1.14139514407052	0.913866098754431
FADS1	3961.34072610794	0.371350718690377	4.53840139461343e-05	0.000240402350024293	5.18634990065837	4.42347235296675	6.38800344121048	6.0978718593897
FADS2	6178.91166886776	0.381429755804164	0.000115009683058381	0.00056018823501857	9.51790574776871	7.6136089564303	11.6078680519332	10.8043595344813
FADS3	1965.77210492432	-0.503475106010363	4.02445099820663e-08	3.58379012689069e-07	8.19920911267994	7.61833106842258	5.69439811765526	5.50681673993248
FAM102A	1655.83253465516	0.792904402501746	3.65464868486139e-17	9.19228854642621e-16	1.66590755758935	1.77610649798357	2.94761600579779	3.03008919370006
FAM102B	743.370153867094	-0.466330670831031	0.000152875423488886	0.0007250962952367	0.950603126378862	1.03811509465636	0.699755629333036	0.743219764240346
FAM111A	2590.49235118556	-0.404651621129033	9.42654304557431e-06	5.61160038982621e-05	3.88927433376718	4.50183646655536	3.15078051119554	3.20065263634373
FAM111B	411.822505666134	-1.11116160175512	1.0561222760882e-10	1.34489602835977e-09	0.846699972716448	1.1019896766202	0.473850204061764	0.427191114040208
FAM117B	1135.39643341355	0.732849229639052	9.17171917485377e-09	9.00690095050927e-08	1.00722205069098	0.807876654867466	1.62071232072606	1.41330710459882
FAM118B	785.930424826083	0.364756240383083	0.00239983512474834	0.00851630348404036	2.01320378196974	2.02610511184459	2.50552144484243	2.71547732484157
FAM120C	988.293279623256	-0.887771209938984	9.21721944522897e-16	2.05923526193998e-14	0.904270582704462	0.967412063406218	0.512611810312013	0.501122270747329
FAM126A	8426.63704785557	-0.573164215809321	8.71284024308682e-18	2.34690547824424e-16	10.030330041218	10.1362651442827	6.7704641484923	6.82796400810838
FAM127B	981.474568064889	0.479616408446468	1.68143161083934e-05	9.6685499742132e-05	3.82985631075683	4.19219703057237	5.62987526167481	5.57409122612435
FAM134C	2945.70452845289	-0.407130777253258	6.33854454347055e-07	4.62499795199065e-06	5.24278754156111	5.61235568126459	4.02780619410665	4.18122197694823
FAM155A	3427.81195858813	0.485695564512956	6.9809709000492e-10	7.93824175999607e-09	4.40779561594489	4.70525147557595	6.3508775676295	6.44290159311334
FAM155A-IT1	1357.84664672992	0.336192887112005	0.00142354962767417	0.00534253111255585	3.79138696371547	4.39505268717959	5.22374183248444	5.12166045722747
FAM161A	222.704913874241	0.663303547144098	0.00121998133505309	0.00465443406381881	0.292597947244349	0.255840890001215	0.436004205928196	0.438339180039193
FAM161B	263.258243627638	0.670625964842123	0.000562880745994149	0.00234217592252619	0.320981832994464	0.37616485911275	0.587390747935926	0.521045426624216
FAM162A	385.75096806362	-0.675058174609121	2.39825223545458e-05	0.000134245570969145	3.61379069255184	3.34721016793471	2.11310702937453	2.26977140246304
FAM167A	637.426387174841	-0.660021625546516	3.02286320326954e-07	2.33706553608503e-06	1.15228269389983	1.19624618972085	0.762776171636279	0.726893648112978
FAM168B	4910.91100996094	-0.451865157530215	3.59529401087847e-08	3.23960300197306e-07	6.14642861720657	5.53941651403092	4.3987848706032	4.17684990644474
FAM171A2	225.577198493661	0.607561841003351	0.00254718366316693	0.00896589763921039	0.419364267759409	0.415880407704737	0.653759214413127	0.622964650314831
FAM171B	1098.22809091074	-0.337975164584276	0.00132853028683677	0.00502941243897935	2.15059332943764	2.09393472173884	1.70565193742992	1.66421505094369
FAM172A	959.654368679049	-0.46243731147253	0.000162933745280241	0.000768484774386036	1.54089414404179	1.35733048164866	1.12653162369338	0.985197349153325
FAM177A1	1660.06996166914	-0.443013694062335	1.48214378465146e-06	1.01062515154511e-05	3.3699432466323	3.34029953046439	2.44187717387525	2.5119643046425
FAM179B	1406.50575876136	-0.342846180175256	0.000420654814024306	0.00180270463601051	1.47489371227358	1.50932048536605	1.20075101731084	1.15866656619319
FAM189B	1827.00329857853	0.550077212537048	4.09409589566739e-08	3.63728098520345e-07	1.32742189500394	1.53342801582445	2.00902676495316	2.18719510063969
FAM196A	17.851634070087	2.55352383892781	0.00129215662691571	0.00490393291933638	0.00704067253372625	0.00753229362305339	0.0531321114790213	0.0322090777437527
FAM198B	298.398281013206	2.92229587455942	1.35677336071255e-41	1.6103203824957e-39	0.0969064809092534	0.0680354458259538	0.654170972830406	0.618430890760327
FAM199X	2697.54283708873	-0.358078745190603	1.75931757192495e-05	0.000100858688878052	2.37498122293084	2.53404724939364	1.95166186381987	1.88762552292302
FAM200B	772.400324514552	-0.68953015248669	9.07492297606915e-09	8.91760865798464e-08	1.3713280865036	1.3039469555184	0.835466859945473	0.829984082100949
FAM20C	5054.77271361824	-0.573297023100955	2.37916124653377e-15	5.03401360130098e-14	7.81834335834334	7.64999080030119	5.24430992833719	5.18676184848117
FAM210B	1714.58750939426	0.386250819942246	0.000179030398274964	0.000838418560602114	3.17341287311969	2.85379122738696	4.17533346307128	3.73466645836272
FAM212A	118.312520393604	0.753415703704889	0.00760011488617878	0.023611645266018	0.441555777952642	0.606443790326086	0.895898720352904	0.862591311055443
FAM212B	1600.48826702759	1.61481254758582	6.08590653264959e-40	6.60407800314375e-38	0.885354201851771	0.706011226935317	2.640179930758	2.264773165805
FAM212B-AS1	124.455320977758	1.38136964812984	7.40769538820962e-07	5.3462094222176e-06	0.203845806656894	0.194713854978861	0.567710751910641	0.474261514777586
FAM214B	1544.14349809751	0.561049305859645	1.77080821786495e-08	1.67301731628137e-07	2.21391716030891	2.37992153550596	3.23705383226286	3.55882260972059
FAM216A	299.388098026579	-0.543221353965373	0.00207843456506347	0.00749124031137468	1.37495308080425	1.50042323292554	0.991033085744117	0.985498674104238
FAM21A	1901.01179573594	0.393479740211724	1.70984218035492e-05	9.82076461397049e-05	2.08524561514019	2.21216528175336	2.73750705709705	2.92332763988892
FAM220A	696.480973361948	0.413449079451373	0.000848905058781476	0.00337253285905026	1.64530976906497	1.67548369970279	2.18791537546137	2.24907173849796
FAM227A	103.601790189965	1.33782058129543	1.8391016572489e-05	0.000105036211943328	0.0419219662213706	0.027229873863421	0.0908599742460292	0.086575464533648
FAM234A	2659.6175421052	-0.423126123472181	1.74603715411484e-07	1.40348129340279e-06	4.81110292633475	4.88651413102568	3.62552980744034	3.62957375417148
FAM234B	585.914838285258	-1.70123327745939	3.8307084768248e-34	3.18011602076079e-32	1.10255317799117	1.24013754350162	0.362421395629097	0.359157129049307
FAM3A	1051.8036273885	0.377712976209311	0.000626167874009578	0.00257240193130165	2.85141937789228	3.03664043358042	3.65928149436255	4.01275877456985
FAM3C	1915.4096236824	-0.638135758177211	1.83339029124348e-12	2.88331938970713e-11	5.74669441678471	5.54335178585367	3.72293172746862	3.5558943468421
FAM43A	962.312694500588	1.33102255255486	8.29133043987192e-29	5.31484776550777e-27	1.08722177200181	1.05284041182208	2.52673282792944	2.88313911313067
FAM46A	3316.03624795658	0.517881218301136	2.60320799527069e-11	3.61829239379253e-10	2.99335196431034	2.98706042202105	4.31666097618363	4.2745498127629
FAM46C	5681.28756788224	0.819743939454091	0.000343952159539933	0.00150840555751602	4.97753786055705	3.85773693415565	8.50613406644442	7.14690154154107
FAM53B	915.142007501049	0.476070498451241	3.60035609805244e-05	0.000194996826529813	0.777327781622251	0.866014633278789	1.15410883551527	1.13457407834408
FAM57A	909.811133117266	-0.563586630655315	4.58284180504178e-07	3.42799274752313e-06	2.95000277998929	2.92315844496854	1.99503893852503	1.99247904454074
FAM63A	434.601995218718	-0.542071312974494	0.000719068761177812	0.00290921241539636	0.903169539474252	0.74891803774723	0.592915353439781	0.547937403006633
FAM63B	5504.20322535114	-1.51598617423932	3.54789359933456e-93	3.59330663740604e-90	5.41858764381466	5.30695014720659	1.92907239417731	1.83274738911468
FAM64A	326.348894403762	-1.17963835511231	2.92648551213383e-10	3.5397426672243e-09	1.59160421852696	2.02092803866506	0.729833127314589	0.86785273900377
FAM65A	4981.24334405013	0.360302918988645	1.5706613179923e-06	1.06287246070998e-05	5.76931409199946	6.22032359560502	7.78006288705866	7.64984346698672
FAM65B	1398.38494500738	0.735370359620977	6.07442111590607e-12	9.05619289429293e-11	0.740817879627256	0.805053749862494	1.20320955423633	1.37734584971629
FAM65C	7256.28377900531	0.707415814190614	2.87900317499863e-24	1.32538837074482e-22	6.9984520632238	6.84389079209458	11.4677333626829	11.2119489367132
FAM69A	3049.67949412912	-0.405027072543127	5.5921225160034e-07	4.12605756498901e-06	7.06871254031264	6.72679758050599	5.15366265228747	5.30589086371109
FAM83D	627.661029537002	-0.918922455023811	2.44327873195319e-08	2.25643103318133e-07	1.7952967432807	2.36666757940122	0.949541073656088	1.25706383904188
FAM84A	628.494389104539	1.21142705445817	1.70796005741242e-18	4.85905041052613e-17	0.371186295146545	0.363141799272366	0.906838459701399	0.798987518472194
FAM86DP	235.087760597691	0.549674193331168	0.0070109543162317	0.022024486760172	0.438307993817661	0.500041651787335	0.632646606216873	0.74314593842432
FAM86HP	237.288312269549	0.751897350214011	0.000652380165225795	0.00266666259184343	0.4105816767352	0.623579402350025	0.855297366019468	0.87743190239446
FAM89B	765.412471444832	0.43300325714218	0.000741426000634636	0.00298614628887629	2.82191024370579	2.67516537354154	3.98820634178315	3.45809383230853
FAM8A1	1518.00714770718	-0.553541638700769	1.86065438539144e-08	1.75028244104438e-07	2.38155667279307	2.30160065773361	1.66444527375899	1.53642066016326
FAM96A	564.731023264666	-1.16684273343921	5.46081526775585e-16	1.25129269302786e-14	1.3032537680595	1.31162875789844	0.528161156174299	0.642538506382534
FANCA	1077.21281536239	-0.622807469168312	1.53671987062635e-06	1.04455696977877e-05	1.14982594855705	1.45177013227702	0.779248776288703	0.913407783920031
FANCB	343.346552587346	-0.688617663417655	4.42979689482494e-05	0.0002351414200775	0.815070286370023	0.916573332747361	0.551729176431896	0.523526670135293
FANCD2	795.945972612715	-0.83223112921614	4.96509873839411e-10	5.81123112740241e-09	0.911319050319948	1.13096672147159	0.545811690648128	0.602962106799266
FANCE	325.191657596914	-0.553097067035432	0.00140035373040827	0.00526591568043802	0.893807729084651	0.971159548047172	0.672064023005483	0.600004062880845
FANCI	1195.95185977543	-1.02304683393677	1.43884745553873e-16	3.42080916190052e-15	1.8594731946631	2.29791459600901	0.948109328766	1.10232608110014
FANCL	451.574343713624	-0.572439270356594	0.00012010867492451	0.000583714328040039	1.82729842570752	2.01238792705751	1.27587815778345	1.31127395488885
FANCM	610.876202189115	-0.513044442921194	0.00078282078266809	0.00313293291103625	0.529358935875829	0.709062851211108	0.415441045863109	0.452573800595886
FAR2	828.85145785497	0.627315313024821	1.22897651695467e-06	8.52054564095283e-06	1.0421236369795	0.918240987426679	1.6288503960266	1.41354690342426
FARS2	468.487015307921	0.390942529914624	0.00829057537280146	0.0254496708554455	1.11150191000893	1.17466774633647	1.42792701718833	1.57876062683185
FAS	1950.27834000867	0.588556774308979	2.49231382639949e-10	3.03878263648966e-09	2.25237766439271	2.22993720055653	3.21372002390488	3.5532825578142
FASN	9543.38100357703	0.471284551194457	1.08013825715577e-12	1.74383213631354e-11	5.79477583295642	5.84382643618228	8.13281924602139	8.05353053290977
FAXDC2	351.246030321803	-0.557271777068831	0.00100162813925015	0.00389972698397956	0.913740294475713	0.783568665160428	0.584610000203319	0.57546701253658
FBF1	373.832264010302	0.635163868087758	0.000214510171233554	0.000984543359933583	0.338200563509876	0.434533576042696	0.589052889852472	0.609160877277988
FBL	1675.37655380394	-0.435632833779612	3.19369364716093e-06	2.05936306823722e-05	10.419097851089	9.9228286415316	7.40731469679104	7.69551229077419
FBLN7	138.715703883518	-0.868835776423632	0.000671316407550692	0.0027343138760188	0.437283645471363	0.523406764847267	0.252503195404502	0.274135537598186
FBXL17	1003.70757893927	-0.507778078119492	4.47147764910971e-06	2.80589378130007e-05	1.33063430383026	1.46025281091676	0.968133486287117	0.999077277994595
FBXL19	1082.20348351396	0.572789586842114	2.34342358722852e-07	1.84271693256603e-06	1.33319507739128	1.41648831929348	1.94201123434164	2.15978532981496
FBXL20	1906.40969166495	-0.474727846736235	4.37919308935557e-07	3.28536797103653e-06	1.32111393742512	1.30783937584912	0.996220692472344	0.900815270400675
FBXL3	2618.91423335164	-0.446613282003658	1.52944602163837e-07	1.24253176260589e-06	5.37857864758866	5.09520346682299	3.9435144563105	3.76921246134673
FBXL7	1518.10110885349	0.534625858410179	4.40921068811829e-08	3.88317268254452e-07	1.50250099035461	1.6450347678198	2.30590818338648	2.26153281728512
FBXL8	105.790522084986	0.717048632340578	0.0126538933482214	0.0368171224510636	0.294952662047029	0.321775909287269	0.500327383094117	0.514873891542818
FBXO10	960.297189398541	0.76526194973559	2.08352935079554e-11	2.92001641118873e-10	0.946785320724801	0.966821748212701	1.55142499200414	1.7126527628509
FBXO17	357.856474306613	-0.388965887256228	0.0174105508151893	0.0481787045508846	1.02156871663922	1.02289519011422	0.747110484214864	0.82074902838168
FBXO25	414.929665302241	-0.535497389459543	0.000907984412784025	0.00357730788356196	1.28892418148781	1.18650056133571	0.929274589554672	0.783868933925999
FBXO28	1911.706758521	0.933975182510699	5.49167002789835e-23	2.27328204533602e-21	1.5585274569453	1.40367006939306	2.84315096989132	2.84463696745007
FBXO3	1027.09437914991	-0.428302471622872	0.00010872805585043	0.000532322470022475	2.70844463019151	2.48099472138605	1.95442063422936	1.91903276623247
FBXO32	951.683429837026	0.824811739439214	5.33924180516442e-12	8.01519382451164e-11	0.653085121187221	0.561530537665356	1.10401926298352	1.0601968965441
FBXO5	608.732946655297	-0.705057086936453	1.05040112299885e-06	7.38782123175861e-06	1.66910553157122	2.10413400081112	1.16759970436061	1.14708011354362
FBXO6	85.285057051581	1.1394861937926	0.000640206942295371	0.00262652548402681	0.228355054848225	0.192868535810953	0.409402813474366	0.527827976986635
FBXO8	565.820893261865	-0.401020734219312	0.00312072047414777	0.0107578818795673	1.60044238696082	1.48942804121404	1.15721448575182	1.19404718887883
FBXO9	1616.82286205163	-0.962198144572697	2.5628199499581e-21	9.18263223579325e-20	2.68056125164172	2.5985505858592	1.44720348335564	1.26958797155379
FBXW7	1392.50370977194	0.603403880628434	9.28344716115335e-10	1.0377787290084e-08	1.38177467669453	1.32152332084661	2.07056459012583	2.05326992299651
FCGRT	1447.75590472924	0.476580061143917	5.5757765170954e-06	3.45180101253925e-05	3.79250500821256	3.29025266436594	4.99196228848664	4.91572951578888
FDPS	2924.04701170606	0.506777927849242	2.09244650662314e-07	1.65997113987565e-06	9.84162391648035	8.1878535587119	13.0884823208596	12.6552904436909
FDX1	521.659261303271	-0.567797424742516	6.22945362761253e-05	0.000322007007521911	1.27063363112906	1.15734706169496	0.800920268880139	0.845823653120224
FDXR	966.401103435731	1.38218243228205	3.14494264498093e-34	2.62516311332694e-32	1.3599344354052	1.32508845771325	3.53892461327233	3.48763619828939
FEM1A	958.268022365491	-0.571610764941232	1.29478299286147e-06	8.92888934523441e-06	1.69670573843883	1.97536800644307	1.26777153828889	1.20528044727619
FEN1	783.402338018465	-0.834488101991558	1.76740879693302e-09	1.90970657489378e-08	2.35349364907014	3.03875840424029	1.45027329288768	1.57662115741673
FER	4003.09218189927	-0.339455158863125	1.18610412431016e-05	6.96263286573415e-05	2.09120706817046	2.06621317641337	1.69657016918808	1.59937881113384
FER1L5	45.5283442900178	1.70661198967587	0.000190618049165381	0.000886671586932169	0.0201513258382175	0.0205318187702467	0.0724147874711758	0.0605797617909607
FER1L6	613.625920963787	2.88293996360948	4.25843543261996e-75	2.3960796700875e-72	0.164089208956571	0.131660160621899	1.13832541448632	1.06875436785617
FGF1	3494.66552942719	-0.505535334276067	1.853203956111e-10	2.29266079000312e-09	4.88104045784289	5.1039905614263	3.41232183176118	3.64368661381313
FGF2	4547.7840936152	-0.422072575139564	1.34716917088505e-06	9.2439900831462e-06	4.36795591101374	5.10001577061791	3.41703882043408	3.66702775065334
FGF5	9642.46345424489	-0.403312104778055	1.88695624167468e-07	1.50718397600009e-06	11.1991630907394	12.5508248266475	9.30566747917102	8.69674292624475
FGL2	3344.33112340164	2.92780746436639	1.12068641425002e-21	4.09266057819382e-20	1.33040502007312	0.906090978591089	9.28205180682906	7.81697472730869
FH	1619.68357299637	-0.421200234535822	7.1682586004618e-06	4.3525253660358e-05	5.92976829559065	6.29848113302897	4.50716720643502	4.64990948447697
FHDC1	104.723384751581	1.63803127734573	5.74618465534334e-08	4.98549613272279e-07	0.0469254305231619	0.0499459067081426	0.15206709583393	0.149831261484314
FHL2	7368.10693567787	-0.467764135108282	8.07841135273159e-10	9.09764457158623e-09	19.5755603816773	17.7879901836526	13.6956625833577	13.4223091646377
FHOD3	2580.45169155928	-0.427549657752511	3.83727855024969e-07	2.91479678676966e-06	3.15236939685913	3.23997499749394	2.29828838044835	2.47078158223872
FIG4	980.628253223513	-0.422771210624009	0.000319141068442152	0.00141160198871732	2.36434218884403	2.08469871477465	1.72818395609804	1.60551453953596
FIGN	624.252553742534	-0.686997995958451	9.96298511232747e-08	8.33008639661414e-07	0.648505819338825	0.66887835040793	0.408775676355766	0.411870493229166
FIZ1	347.884658403627	0.65240139676024	0.000102080387229964	0.000502916864397829	0.606567173127384	0.645801440351206	0.942628075329387	1.03097189342669
FKBP1A	9337.82398912361	-0.50940427962721	1.645122958455e-14	3.17569351776981e-13	33.3464281242011	34.262803503203	23.8706520175554	23.7717683797973
FKBP2	439.1427097787	0.421289130852775	0.00472716141875145	0.015470710097732	2.44907422094386	2.49404915965234	3.32343133107143	3.31560177397768
FKBP4	991.438993945302	-0.366363136761227	0.000858034006531538	0.00340346021598619	1.82304410574117	1.8500720535504	1.37700367183561	1.48281915303431
FKBP7	815.160896028081	0.508120261526404	0.000104661589144117	0.000513919455315205	1.55568605559668	1.29167163692768	2.13168926624578	1.9414846801295
FKTN	2243.94588419472	-0.83512291533782	4.06939941195969e-22	1.56116959258817e-20	2.29965230081791	2.44865207862634	1.32030464405423	1.34863365529618
FLCN	3354.8536727413	0.826847073961073	2.75190991870533e-26	1.43666719879626e-24	3.63272430536743	3.71516534095437	6.44807410477737	6.62645432538461
FLJ23867	2966.34387875311	-0.501743719222899	4.2324217899334e-07	3.18311642735981e-06	8.61159433680117	7.13150821102012	5.70978362328716	5.4583130201068
FLJ32255	598.734249573491	0.347551483672974	0.00886985201025678	0.0270204114176501	1.18534864169491	1.16404445131933	1.4463070111878	1.5557916150234
FLJ46906	148.767844045912	0.926606236278679	0.000336248485587273	0.0014785201137603	0.73153501998472	0.52229608736218	1.20858302929228	1.20249454508469
FLOT2	2740.098827897	-0.457091853215115	6.92745066016353e-08	5.93245943794839e-07	7.29601222126825	6.80457765877929	5.04750016686543	5.26727275216919
FLRT2	880.714925622825	0.810083158254258	5.3540438501637e-10	6.24241244602356e-09	0.423557148356511	0.376484814021238	0.766140618970485	0.642804339137046
FLT3LG	315.784284151003	0.635759104132346	0.000270963120910213	0.0012164514577033	1.21098506172172	1.34141538387389	1.94065426545614	2.03050881736478
FLYWCH1	1798.62093573971	0.561195914521023	2.25100842370748e-08	2.09414084341482e-07	1.69735531608245	1.83850745920991	2.43813192302154	2.79402418960971
FLYWCH2	536.771790236353	0.565787888255444	4.67484113233285e-05	0.000247112687830204	2.67682804834786	2.50496435710975	3.84270429990324	3.86445330189235
FMN1	4561.30893405081	-0.384663936461918	3.69485511655042e-05	0.000199616781403392	1.07796227572076	1.31958751221297	0.934501226594532	0.905404056776747
FMN2	2877.30076955254	-0.465749122969201	2.0683599394272e-08	1.93488449506023e-07	3.27383861584024	3.101223681039	2.2584642912234	2.37655527739589
FMNL2	3298.97341830046	0.716776164120893	4.20656308867326e-20	1.3743248697446e-18	2.71267552564637	2.79848689838462	4.55268751548471	4.53105011364147
FMNL3	4777.7570046136	0.327743033241561	2.63280528594249e-05	0.000146404018682424	2.27000769026095	2.39129038687607	3.04233202791906	2.82267418460122
FMOD	100.748818705009	0.942625941482218	0.00421988324265593	0.0140281107707722	0.152426128860333	0.107014304257403	0.30254675499044	0.200475549842464
FN1	248188.060519824	-0.949557049648802	2.5187537124125e-30	1.77976308832422e-28	242.332896194736	205.049886939234	119.853374548513	112.61496743889
FNDC3A	7303.94650231153	0.572632106925689	5.53023993727628e-17	1.3773017233951e-15	5.42843734876641	5.36027681266374	8.02691599529824	8.07302575607847
FOPNL	1244.22969261673	-0.69307583933338	6.98241751763291e-12	1.03489645783297e-10	1.93894337125868	1.98686825561737	1.1912099515648	1.24511447084541
FOSL1	6125.47658901534	-0.414376950777004	4.79413659550051e-05	0.000252802926618687	21.4277193452555	27.7507163572761	17.7290137692545	19.255343671224
FOXE1	60.287899042131	-1.74402132229131	7.39099518159163e-06	4.47681829841222e-05	0.150613839001159	0.17983323820859	0.047922140276134	0.0508559095535194
FOXJ2	2270.31066628543	-0.361519793723994	2.69377697334529e-05	0.000149411682289382	2.8922715451447	2.83839309303142	2.17213911634334	2.3055123889297
FOXM1	1672.38421255485	-0.745605339282366	1.01539217267004e-09	1.13341938921405e-08	3.06626054659387	4.00721220268259	1.97186439521027	2.25463297055221
FOXO3	5821.41645154973	-0.335142686466048	4.72913011844571e-06	2.95779929021932e-05	5.38690509209186	5.22111220151362	4.3174653778999	4.11931822193248
FOXQ1	64.9792196115123	1.9655703905049	1.08216762143207e-06	7.59366766965176e-06	0.0883080678958466	0.0500999840400117	0.271361261788109	0.281564840809359
FOXRED2	535.88511727466	1.01265779736386	2.20937609449851e-12	3.44254785924322e-11	0.397954982369485	0.466679317733176	0.870143163889414	0.873854904349174
FPR3	52.1575785615946	-1.8480717560727	1.79195361678308e-05	0.000102497587899731	0.214069006134039	0.16672908963516	0.062872830741357	0.0430463701642815
FRMD4A	3839.70443619793	0.415765375086927	1.08663171702783e-07	9.03563713469446e-07	2.10643675641929	2.28445967573054	2.93103894719512	2.94074821043588
FRMD5	238.031838754815	0.612709443022044	0.00182013120737569	0.00664378503182401	0.193993510810356	0.206392650757283	0.300779713075103	0.312819235866896
FRMD6	18275.5576793201	-0.4441817936406	2.0466014584962e-12	3.19876227957554e-11	24.601636378657	24.5016106890179	17.8700737456653	18.3410669560511
FRMD8	1583.51737652842	0.392162162708411	4.82196868481718e-05	0.000253918018231343	2.17057083120472	2.32523018625919	2.86110966872003	3.054607609006
FSCN1	9812.94353453013	0.363018100135898	8.39177290618513e-07	5.99942654074186e-06	17.8911783779883	19.9127355097019	23.8727828802035	24.8800444866385
FSD1	247.700164793608	-0.48249429501517	0.0130966059734331	0.0378906185390204	0.913880057267762	1.01094126276112	0.649721293097585	0.731629811300032
FST	5638.9345807766	-1.32201968128653	6.66567545369607e-71	2.81291504145974e-68	22.7195368025688	24.5480267502524	9.37970756347296	9.58030001683857
FSTL1	53560.6112201816	-1.00613936741229	9.04965069034062e-52	1.71852866609568e-49	118.623238738105	110.541337274488	57.6325353622657	56.8520921454461
FUT10	641.166513189237	-0.963781925651758	2.73654306867801e-13	4.70289166282311e-12	1.50461176860858	1.43653920566908	0.792173268524545	0.720331914604153
FXYD5	2472.96175941628	0.42764994160421	1.0479743360869e-06	7.3775839267063e-06	7.17271652108389	7.76422784370149	10.3594956878805	9.7721126857007
FYCO1	4569.21162452802	-1.05629377133733	6.69284152385415e-43	8.61674986698239e-41	4.52273627280734	4.39291601160937	2.2163187347498	2.08435446519595
FZD1	2248.97918589171	0.624479745970231	5.3364652049231e-13	8.89918544381907e-12	2.42091631374047	2.58881425411796	3.84311814555621	3.8987671409392
FZD6	5429.61456850224	-1.19108852437292	1.92879810779374e-56	4.37347773934366e-54	12.053127628629	11.5755639162487	5.33091003108328	5.05127866008541
FZD7	6721.41096353786	-0.488653168842598	2.18606650230568e-10	2.68912731198607e-09	13.1654506520174	11.9082422909826	8.9279400445239	9.01137698394581
FZD8	474.566059598234	0.42466960626393	0.00846864484378116	0.0259020842493906	0.693412103752846	0.875192941535119	0.970738769176486	1.13520682206967
G0S2	3692.99741962114	-0.412748703012725	0.000103514974710242	0.000508931875662782	24.3586213450005	29.5754453180179	18.3578065983879	22.2690673733892
G2E3	1719.68072640977	-0.703054229562291	3.64136713489318e-14	6.8043849339849e-13	2.17978493549797	2.34143041454479	1.39148702782703	1.3925426555849
G3BP1	7200.86495681906	-0.344758305647982	4.74086616027485e-06	2.96391928834961e-05	16.6841110879319	18.3039856202793	13.3715802175442	14.2596301656583
G3BP2	5644.08286629647	-1.28021620676766	6.09366439855779e-58	1.54291582571483e-55	11.1336238666365	10.4868928971421	4.66702876366072	4.26304065912834
G6PD	6975.7528471026	0.584561146349117	1.59609510986918e-14	3.0928414424914e-13	14.2914980846691	13.007353135524	20.723102651901	20.374668559696
GAA	3734.61834927139	0.363959236410941	1.23461882825558e-05	7.23344745038901e-05	4.4575599145272	4.17609925593559	5.79429421873802	5.35695982864642
GAB1	2219.62629996491	0.526877287572804	7.54602446869726e-08	6.42956835268922e-07	1.47492031477945	1.35339175777077	2.17390982904121	1.9165321516897
GAB2	900.06508490479	0.707832469268827	1.03963284587805e-08	1.01244244837047e-07	0.711520024282683	0.636109806064329	1.1733944800756	1.037958706883
GABARAPL1	3219.12788088497	0.445579386164617	5.52376548087372e-07	4.07958411207747e-06	9.58601556305125	8.36537861140475	12.1523679287706	12.410909487345
GABBR1	2315.09140335162	0.551685090956392	9.01528131371426e-10	1.01003063213825e-08	0.340871694242717	0.309897510327455	0.485591964703571	0.472537943505067
GABPA	1550.53548254084	-0.462415984645126	1.07151140614458e-06	7.52932529239061e-06	2.0728828689261	2.13986781411456	1.563511161881	1.50190187317937
GABRB1	38.6860833290382	-3.59134646863339	6.59378888533625e-10	7.55451287677438e-09	0.176823099315811	0.221448921507348	0.0198569551635046	0.0128399281426249
GADD45B	822.72324815348	-0.777335685216531	4.15276951130455e-11	5.60789994806566e-10	4.78850425183354	4.50845982611033	2.71759640773703	2.72948110873166
GAL3ST4	1049.24609895001	1.07511303454055	3.65891321361108e-21	1.28970323761437e-19	1.73709302218185	1.52905264000991	3.42049603369432	3.5028102456913
GALC	1250.54874937495	-1.10766180130726	1.23859275043153e-25	6.18970429755126e-24	2.63062307488854	2.41431345487981	1.20256917157157	1.14755671175494
GALE	665.91537289994	0.498166388014833	0.000156012511807055	0.000738362018496192	1.91379803332222	1.73745750817462	2.47060207644927	2.71667310211545
GALNT1	3718.12244745967	-1.26041698973639	6.85926603477394e-61	2.00396095385165e-58	8.26234112062701	8.56249864951233	3.48260709727966	3.56231929885417
GALNT11	950.130897855053	-0.517114912581563	1.41068237722955e-05	8.18918099918657e-05	2.63276796011604	2.37839782988699	1.85463671977969	1.66033737378332
GALNT15	2636.99377081979	-2.18510500395627	4.62464977612492e-143	3.51288396994449e-139	4.61126940568742	4.65600543318589	0.986514700362242	1.05921288566804
GALNT2	11311.8166385503	-0.676248865530066	3.00643047157233e-25	1.45922337776763e-23	16.4939612077331	16.401338953565	10.2408298513056	10.4133287193886
GALNT7	1849.66275305856	-1.28254135371665	8.32749772437583e-46	1.2164552445069e-43	3.67555375328496	3.81698017481156	1.54376031478605	1.54501987817779
GANAB	17032.1091247092	-0.715087169114587	5.31156950846313e-26	2.707831005791e-24	30.8403233152273	28.9150548139104	18.090381610515	18.4402028659406
GAPDH	110539.62878554	-0.523291476636491	4.564924375968e-18	1.25634657825554e-16	416.985486037814	431.115944250411	292.817857063163	299.153693537171
GAREM1	90.0189481923532	2.1225554266421	5.5016926535503e-10	6.40472910289166e-09	0.0335106797366207	0.0247652116645134	0.133098317628562	0.124255179565011
GAREM2	170.65456225509	0.856660036185725	0.000315380845011743	0.00139687049487417	0.129567342588325	0.121567147908793	0.20534568046673	0.252389877641446
GARS	9235.34602738045	-0.667047643592698	3.93006298625128e-21	1.38207215016503e-19	27.9218101362195	26.1478374410592	17.1237968366509	17.0510611322448
GAS2L1	681.652728442246	0.381498834958104	0.00485233898249918	0.0158496525095953	1.27147169235836	1.56184388130056	1.81157537051045	1.87938581282205
GAS2L3	934.726482780126	-0.683228558612653	1.60180919405814e-06	1.08202246670214e-05	0.960409619907259	1.26740534888098	0.627863353922064	0.761973453475399
GAS5	2119.17224075113	-0.451169879922993	7.87905839423893e-06	4.75371942515003e-05	25.8045015360487	21.8234918950457	17.8301004521159	17.1682069704778
GAS6	35491.9771600809	-1.04811907145376	4.87489971437598e-60	1.34653593565091e-57	118.744538440187	113.513837676421	56.7217305541623	55.9740849194068
GAS6-AS2	690.630074080432	-0.794665448460709	1.03481464126245e-09	1.15255894648527e-08	2.88872630751215	2.66225175231773	1.68802523894575	1.52324523844099
GAS7	3615.73113589736	-0.422548995552684	3.94114894332757e-05	0.000211868134278246	3.19511208703293	2.54215609884208	2.18408460444527	2.11606760603923
GATSL3	445.294596602693	0.563040457059573	0.000203019332228547	0.000936613937205008	1.2931623210077	1.43769171656901	1.95789333066839	2.08279941657084
GBA	2126.53976415499	0.777337513457322	1.17311322873044e-16	2.81919798025977e-15	1.68045543002995	1.92068114201903	3.02771781548637	3.15446000247821
GBAP1	220.656354895015	0.840058662923824	5.37676254086835e-05	0.000280507474316181	0.239147485783636	0.238328037900415	0.398732923677178	0.459911476225008
GBF1	7568.87814839962	-0.565741236468372	1.35128619386149e-16	3.22778928571443e-15	8.57034785268429	8.69559906220425	5.92503380558716	5.77567920618088
GBP2	2678.99964150959	0.572752269360889	2.16475795415932e-12	3.37648899790435e-11	3.22147062301076	3.19335434504514	4.73534076778979	4.83961005403758
GBP4	636.521161858987	0.953197435199009	8.73790106574313e-13	1.42584525231761e-11	0.407987323608695	0.461864432664944	0.827188941992625	0.858371240474736
GBP5	51.9211242921094	1.48656294029529	0.00174988705262477	0.00640981333809674	0.0229782107056022	0.0614567106827875	0.0975397558130287	0.13455205074505
GBX2	417.585885606283	-0.416784895241104	0.01299066407447	0.0376331747060822	1.52727911425181	1.74272794483181	1.36318364918851	1.08509376738114
GCC2	2704.33136837925	0.383259445244411	3.73949751891203e-06	2.38498934959326e-05	2.00391668074715	2.13860838319621	2.72890688234332	2.68713618659254
GCLC	5608.14365751193	0.608068679917292	1.30322318868818e-12	2.09066174050166e-11	7.71108415370319	6.61850521428387	10.8604699087564	11.0786658042317
GCLM	1233.93769583209	-0.604448311279681	2.78599122174581e-09	2.91895025108706e-08	1.8285159151653	1.79942206467782	1.22003098559737	1.17379012644637
GDAP1	36.6366941530781	1.77358883607002	0.00050543441069123	0.00212290836804566	0.0287224679563059	0.0234728077889406	0.0940767289502631	0.0861381222050541
GDF15	998.955281440134	1.72643050913243	2.15517094806393e-50	3.76337437275716e-48	1.96061240663476	2.12361416062421	6.57283194570479	6.96435499752076
GDF5	145.810132790338	-1.85794102600796	2.09257549248204e-12	3.26725661683322e-11	0.524522223426693	0.560506865055901	0.126143906988125	0.175308876099382
GDNF	774.467795323251	1.74068371535357	4.65706337865271e-42	5.70565377810419e-40	0.498707961524047	0.553776262921919	1.80846629442953	1.70972748788757
GEM	1116.10723076704	0.847029558253005	1.44197328242789e-12	2.28907608219901e-11	2.01264284472205	2.49379301487613	3.91730213009568	4.19008792393098
GEMIN4	833.480195406111	-0.406415645497075	0.00110460170409409	0.00425161111948249	1.45312705789742	1.67482542018051	1.11751150261659	1.24757148801863
GFM2	1214.77158688885	-0.379148078758401	0.000184967009500311	0.000863558330770967	2.23916837045034	2.18604260963453	1.70525957062027	1.70973780004426
GFPT2	468.45850352337	0.720033987441788	1.40955775904488e-06	9.6502935896394e-06	0.740344130805855	0.665398873521297	1.14187229138745	1.18769708935036
GFRA1	3032.50108088702	-2.36623441845535	5.35534056251717e-21	1.86174676946821e-19	3.63919460976237	2.85187144019848	0.707454395521923	0.55563088340307
GGCT	274.013523935327	-0.541205485885781	0.00312229366547573	0.0107608632862766	1.51163239299102	1.50202796365594	1.00065476618823	1.07904199744836
GGH	1047.96409296435	-0.888064330003284	4.34582018513778e-13	7.27912902454389e-12	5.00777554997083	6.22959050878215	3.07012216760886	3.00635041386615
GGT5	23.8318644591164	1.7838768902429	0.00527222149548252	0.0170870036469882	0.0311600749424264	0.0192322236366143	0.0998625628481595	0.0767568821411378
GHDC	608.857512456859	0.340511565249276	0.00925597529122489	0.0279667415720542	1.3243613353978	1.28327107048759	1.66839938901	1.64623073969685
GID8	1710.58811813518	-0.536456169614753	9.69000813991981e-09	9.47301181863975e-08	2.90166996983024	2.72561923240015	1.95480293238929	1.9404869997569
GINM1	1090.89915005894	-1.64434541096693	1.50625856443254e-49	2.54256445676212e-47	9.23293099415998	9.11435715060818	3.0923074531766	2.79027037190664
GINS1	587.098875953288	-1.12049973476667	1.20524334927073e-11	1.72694005309774e-10	1.19024888584282	1.71320253936613	0.659948666807453	0.675020025538948
GINS2	225.84821198708	-0.790625764356861	0.000502062659672411	0.00210991311915443	1.1990575591861	1.79336410787777	0.822678139871492	0.904601229015019
GINS4	455.140498950244	-0.58247233303168	0.000187775078911102	0.000874786568174629	0.828820051975813	0.920397843441501	0.533413338654103	0.638588026310048
GIPC1	2800.68951114206	-0.67213258066919	1.213765770436e-14	2.3947441018784e-13	10.2906621709904	11.4842812005874	6.6605118728625	7.04037541116426
GIPC2	7.3227643188185	-4.0082534410317	0.00456150454208979	0.0150061448686505	0.0156038440312454	0.0271267685415107	0.00122660095176456	0.00142766311910202
GIPC3	155.356734194473	1.24822442755914	5.16331430455887e-07	3.83200151025199e-06	0.119311755388414	0.144174852314091	0.323178806522573	0.30118598921685
GIT1	1648.03801630205	-0.334691608628463	0.000314021170852508	0.0013912539013098	2.92952834279966	3.0899431645954	2.40536381396298	2.37985063033987
GJA1	30697.7256380179	0.759629913032611	3.51473671596286e-28	2.14441285899228e-26	46.1399483583573	42.3707916683626	74.3381657771271	76.0583706385019
GJA3	565.785340954301	-1.26888911100978	2.19896615024558e-19	6.78997840539246e-18	0.974066291276061	0.916763705483087	0.417059641383209	0.369794370828569
GJB2	103.44491676746	-1.75900915237663	3.45831474176222e-09	3.57649540890753e-08	0.412468078705008	0.430593157977311	0.125510943014605	0.124171795650989
GJC1	3230.02902206881	-0.378175468628891	4.70755207447586e-06	2.94672975341728e-05	2.76309329401878	2.98596261911576	2.14271057521945	2.29349496514503
GJD3	278.094445320701	1.33119267546818	2.7383237798191e-12	4.23200558118126e-11	0.256457150407027	0.223845283447834	0.604794403506308	0.612602789892494
GK	910.18053310426	-0.40325839506239	0.00129121742175367	0.00490159297133476	1.27041575237908	1.51940449428202	0.994396574647457	1.1189404052111
GK5	5051.65158279683	-0.869322337897888	1.89346320483821e-23	8.14886487475982e-22	3.3721904586499	3.99052173308556	1.98165381375491	2.05846835471278
GKAP1	48.4349804360022	-1.1492173398082	0.0112884557685022	0.0333451720853752	0.192166379461359	0.248119301631152	0.130224025231384	0.0666908472732046
GLB1	4441.00998288689	0.471014066468181	1.36249124178965e-09	1.49020640354704e-08	8.226695135133	7.70676489504605	11.2619359156532	10.9071758442575
GLCCI1	1195.23847087058	0.332419130451893	0.00270539855143716	0.00946577954708277	1.45139417328285	1.26220646357524	1.75464280876883	1.67977120938457
GLE1	1228.68464938536	-0.352968655272195	0.000477266462247989	0.00201798833689715	2.43573036121408	2.38048609604972	1.8759079658952	1.90926850610843
GLI1	269.79455764042	0.887010718168818	7.00084677957389e-06	4.25768071558393e-05	0.353334341313604	0.289009609424843	0.637751467380955	0.558679540072435
GLI3	1626.1613861269	-0.4461516453394	1.33167266938368e-06	9.14591826097505e-06	1.4067346009281	1.40332366074842	1.02861316268692	1.0410020981679
GLI4	249.641748066416	0.771007103991384	7.63713817420614e-05	0.000386523006687251	0.808628842118097	0.883629741910252	1.3839100121734	1.50929292048156
GLIPR1	10585.0702480917	-0.432553578257838	1.52212223209229e-07	1.23734726145193e-06	17.6766483683076	20.6479924332517	14.6932590943058	13.7709205387666
GLIPR2	1835.56381086545	0.92664211265001	3.88836792212971e-23	1.64089126313874e-21	2.82984544387152	2.62370538320279	5.12611972363568	5.28974256052208
GLMP	1899.14105374811	0.841909012012122	2.00117393862681e-20	6.71122173854714e-19	4.4991791739523	4.54612985531489	8.32797767321975	7.93237858292455
GLO1	3854.31929147193	-0.326882042111932	5.00338427175929e-05	0.000262742529749627	12.2293137075193	13.5837543342218	10.2999948073921	10.3288523891579
GLRB	318.525320610255	-1.10951477875555	2.25513936409237e-09	2.39654357815042e-08	0.801289433745775	0.86756836083724	0.435607062770104	0.337418450190332
GLRX5	1134.02211273708	0.442340370764426	3.51874052573543e-05	0.000191053274006335	5.01327390058078	5.09544708362437	7.15273752223129	6.61846212354639
GLT8D2	1175.1224413285	-0.979604552873516	1.06801186106801e-20	3.64612049288655e-19	4.37771330831754	4.10714300513214	2.15106475418494	2.16967413450411
GLTP	2409.13532580753	-0.668693967026701	1.17267041922907e-15	2.58941991408838e-14	7.58058453463044	7.87249768918079	4.87612144527581	4.87289660707987
GLTSCR1	750.470280507621	0.403486728334155	0.00236677458070563	0.00841470616196582	0.641217933670884	0.746145935108333	0.850857323079423	0.987360270468618
GLUD1	6273.93761309561	-0.414625663642187	3.00011036009019e-09	3.12818645096021e-08	10.9284644740825	10.7381812392632	8.18702456449796	8.12212168681124
GLYATL2	85.8706471964021	-1.04434276756186	0.00129704787172013	0.00492003776958108	0.504012082942239	0.529576501761797	0.286536294995344	0.214101844585043
GM2A	1450.08789737539	-1.21810740427912	1.25544942513518e-31	9.53639383332685e-30	3.26772503083555	3.5012972344777	1.36372449476894	1.55647294011391
GMCL1	819.667191371469	-0.421903360817715	0.000292638082149432	0.00130527238520674	1.34803255371173	1.38639029257798	1.04004992395552	1.00631432850849
GMFB	6413.76699224137	0.360975548955095	8.75294970666041e-07	6.23416839866783e-06	8.03951200810507	8.72118400097648	10.6007546557679	10.9839935691773
GMFG	216.945955423209	0.651677029012706	0.00145202212366732	0.00543998029661008	1.55376638429794	1.59929510075612	2.50201652653515	2.46412054666959
GMIP	802.172308531634	0.428387335599823	0.000765781415652455	0.0030744585799662	1.28984961751555	1.08274540486585	1.61733899762406	1.59543268668325
GMNC	96.1816677253522	1.02901274865196	0.0010317790679374	0.00399765049734889	0.10103015383619	0.114496474878574	0.246332542297373	0.192707338751174
GMNN	530.2508550125	-0.469895146130235	0.00375967233084877	0.0126701291149633	2.46030879802488	3.13112505791446	1.79741782799103	2.24685874181806
GMPR	480.076684160375	0.666296863408436	1.80007679873737e-05	0.000102923472813015	1.39268685294848	1.62687474340734	2.21209101901661	2.58593610232437
GNA13	7137.90698148586	0.657131867402991	8.30430580919604e-22	3.11503737909398e-20	5.18109071135343	5.3207310688689	8.29360254493541	8.31778652842277
GNAI1	1377.55365766313	0.342086084144963	0.000483992873194235	0.0020441533860347	2.01222769562041	2.1020645884935	2.63765826260715	2.59062076917641
GNAI3	5751.6842959577	-0.457726038375848	1.49876260184108e-10	1.87864698408991e-09	8.5635854767768	8.7494160495571	6.17093347912373	6.47693406186852
GNG11	6147.90457490509	0.758440538851664	2.00596929134581e-16	4.73209401772136e-15	26.5398815373201	32.4467167526337	47.9228671750431	52.0764066728002
GNG12	12695.7549713629	-0.372327613937814	1.34701338320602e-08	1.29190829025668e-07	19.5515234931061	20.4409006262876	15.5706046285471	15.4172864236185
GNG2	1731.39953960822	0.678559580510705	1.28506999165403e-13	2.27538267053707e-12	2.07440498039706	2.14408114184145	3.3981641028947	3.37220788639615
GNG5	2060.92070681107	-0.932441711336487	5.51412258116071e-23	2.27380317887942e-21	19.5177662965989	21.8072656691112	11.2089473406085	10.4821222609269
GNPDA1	1493.35546769752	0.592655738567173	5.59374306488648e-10	6.49695295426264e-09	3.20683721873994	3.17207773195333	4.76563466030309	4.88929930012832
GNPDA2	662.684699501091	-0.505010589305823	6.48844385244982e-05	0.000334711168103286	1.96325110473798	2.06332955785724	1.39552820778881	1.44990931778457
GNPNAT1	2767.49855471095	-0.72138638328626	1.8221332750632e-18	5.15490665079333e-17	5.24194058628536	5.55641365399531	3.31960467829763	3.24653137489969
GNPTAB	3628.87060123383	-0.601138296974335	1.49637144910268e-14	2.92196337464882e-13	4.75619439570898	4.80676294349701	3.24750684909562	3.07489550071314
GNPTG	1199.13862309573	0.37702244883702	0.000237489715116087	0.00107699813493839	5.01934804226899	5.29917275250061	6.65706681349384	6.7768955099259
GOLGA8A	1570.72573634234	-0.377833114833093	6.11275364111238e-05	0.00031672903586555	1.64203151106873	1.69087527999542	1.31012598534089	1.26164072584144
GOLM1	433.037720987183	-0.455580742827738	0.00268006205981385	0.00939010673724448	0.901464148808235	0.989333757336329	0.707136012560311	0.673403272738829
GOSR1	1752.40579200435	-0.507387263360292	1.89405738504698e-08	1.77840048168318e-07	2.40428897399622	2.43082159667202	1.69623593755782	1.71624653115345
GPAT3	207.414290484255	-1.16789234131647	3.60545858943063e-08	3.24683621165561e-07	0.628635193799791	0.579375673455377	0.257098414002675	0.283696498563188
GPC2	130.054429365999	1.15226003154328	2.49553870386369e-05	0.000139331951448354	0.217952156766343	0.163347714959148	0.442445046898648	0.41416721978479
GPC6	393.370398251428	-0.775787504069829	1.20483397161844e-06	8.36555653419896e-06	0.447379917047011	0.412481369785592	0.240406532639915	0.264623651135645
GPER1	58.1084090835648	-1.20924939085734	0.00210276769319376	0.00756279516927073	0.17517567913585	0.14809498619596	0.0601464294082967	0.0810590246221364
GPI	10547.1350855776	-0.936660457141977	1.81123395327635e-42	2.27407158827887e-40	14.5733222605513	15.6518008125068	7.90296493503501	7.93364893345968
GPNMB	222.583140662655	1.09227423942537	1.35805410786144e-07	1.11401501115718e-06	0.311852920896767	0.32102725286128	0.705450757074135	0.646605969186787
GPR1	33.0216020571583	-1.80923451628412	0.000688272284393833	0.00279802851070675	0.110062449904769	0.128395050742325	0.0257715802989989	0.0428514432050471
GPR107	5868.51813231807	-0.52532298919194	3.20588202434411e-13	5.46006274818786e-12	5.21688157101533	4.99951925530216	3.58159066265036	3.5417429345344
GPR137	898.167169667756	0.449146689110875	0.000142192181140152	0.000679944480919478	1.70091085555547	1.80474263574633	2.26075939020143	2.53979555906629
GPR137B	686.965063819266	0.742982633391718	2.59596291046985e-08	2.38872613784725e-07	1.66841389588798	1.42240282797242	2.66365527103914	2.54139276657553
GPR153	689.031487791079	0.909243067246957	1.62770618952886e-10	2.02523443335975e-09	0.808771471409211	0.630229886024428	1.39103759694638	1.33252031926327
GPR162	216.662874335304	0.767276475620435	0.000611170250232249	0.0025189632234206	0.451364755617812	0.329837221748771	0.721258910366599	0.62058802137675
GPR176	10153.3337557653	-0.999267509820174	4.2299091959474e-47	6.49098792978111e-45	17.8129913975238	17.0472550564334	8.90081157946662	8.59634210323433
GPR180	2074.1721436671	-1.42684745992048	2.41568304241394e-54	5.0272680521031e-52	1.99279988709803	2.20207877133677	0.787656238281153	0.776021530199794
GPR37	1938.72688686801	0.647409729418755	2.96422752024014e-13	5.06552806383444e-12	2.43346017346122	2.44066748311962	3.86675034420628	3.79215615739343
GPR39	385.5354948049	-0.88105811537787	3.34372671695938e-08	3.02909339797537e-07	1.04270737949708	1.13846105678484	0.579296106001829	0.607834278571414
GPR63	387.246520526544	-1.07628731948922	5.13817598565126e-11	6.86536231961424e-10	0.549416013089846	0.512534969070114	0.270031323751888	0.235021302335171
GPRC5A	1978.73205461882	-0.775511686159141	7.06033010974823e-16	1.59851766061543e-14	5.20220994852013	5.58292361608693	2.96010948240618	3.36168144063165
GPRIN1	670.053788520955	0.603108899271688	5.80632317127721e-06	3.58139105229571e-05	0.738837935927848	0.818432121475194	1.11173624376801	1.25888843574523
GPSM1	4252.57925628748	0.373555271152349	1.13262316857552e-06	7.91845889415521e-06	4.66523032884813	4.84119922744023	6.3412428952669	6.00797685965885
GPSM2	1178.58098350765	-0.96655445859093	5.10767646727902e-18	1.40317940128215e-16	1.46226235081571	1.70879863119241	0.79504218780721	0.830671264044997
GPT2	839.928065228763	-0.754111190278714	2.6227655726257e-10	3.18505632128934e-09	1.5359376569006	1.47455524156495	0.936938752892324	0.853450455482566
GRAMD1B	613.224809336357	-0.745235449726016	3.84585548458022e-07	2.91985190013706e-06	0.512949052790741	0.614792067472823	0.365457689217538	0.307018647689329
GRAMD4	309.183077461994	0.546520692782783	0.00191656830169984	0.00695734901778351	0.360729249285093	0.327142694066422	0.510634795774787	0.499496082125646
GRASP	308.829048050404	1.09883636893119	3.74416291489207e-09	3.84593123752808e-08	0.644318556629718	0.508246017175829	1.22071502786731	1.27139616896888
GREM1	38266.1036200142	-0.804978643332929	5.55982085565378e-33	4.49280842761129e-31	35.6787312509051	36.7064254347126	19.847568937236	21.7219692249228
GREM2	95.9359352979955	1.91746867056147	1.13799971569583e-08	1.10187964823779e-07	0.071209930915339	0.0456299793166576	0.242568475475704	0.206317969435727
GRHL1	55.2589701419199	1.05652519315318	0.0114327716293414	0.0337102563209525	0.0774630221096211	0.0437379710082614	0.124492000731047	0.132298630477718
GRIA4	33.1689238176735	1.43754941137046	0.00884089894900204	0.0269484223180656	0.0187088637748336	0.00979005642846922	0.0466782035544944	0.0320023722192628
GRIK2	592.710765483179	-0.377952904629759	0.010985570775409	0.0325453961037468	0.957096526345858	0.753800429463728	0.680371403460297	0.644374903069867
GRIN2C	9.96226489090024	2.85756619334137	0.0104671150068066	0.0311858033307326	0.00126413704852848	0.00507152444440767	0.0149058626558392	0.0289153403171152
GRINA	6704.71840206785	0.445264205717569	4.01303034614897e-09	4.10268889762416e-08	17.1380594876093	18.3811244471589	23.2309020757069	25.2760914351234
GRK5	4970.38453045042	0.543867535631484	1.3886676553425e-12	2.20907214868726e-11	10.012006442084	9.43742431124711	13.8221796358464	14.6473452957736
GRN	13069.0860045983	0.624251721479304	2.38645762966184e-20	7.95067199776812e-19	27.4545731443128	26.4914739959514	42.4814417122655	40.952399120895
GRPEL1	930.798978875205	-0.438949048562292	9.789735520844e-05	0.000484290661128824	2.28360780077281	2.42823829397786	1.69054884802166	1.79523664124038
GRPR	806.242690463577	-1.01943088525987	1.35468817839715e-17	3.57299007052249e-16	2.51142443744146	2.44534746526194	1.26458165971336	1.18808463336037
GRSF1	4344.55920831214	-0.377705198466703	2.6253363133184e-07	2.04849046080807e-06	4.34413469408511	4.44754544298071	3.37797408341548	3.40966327835795
GSDMD	1581.0173327258	0.355326727386318	0.000229439224260425	0.00104448963497119	1.78445132387795	1.8173112384322	2.2126820185887	2.41127511819793
GSG1	16.0163953140322	-2.69733040033678	0.000778635088129817	0.00312029128432292	0.0480733990361082	0.0670828251871936	0.00821521048361004	0.00956183264511407
GSG2	215.944691262126	-0.776275768651684	0.000677107262717228	0.0027563273138264	0.490503711888775	0.712335150145843	0.328004325182946	0.373647419649159
GSPT1	7981.16722707154	-0.356760734739685	1.13556088303141e-07	9.41672540120809e-07	7.01268644908968	7.17783496946419	5.53204792143529	5.5843301844375
GSR	2044.6228841576	-0.387871691916351	1.06084647545297e-05	6.28074031764675e-05	4.57568406232826	4.44873589292507	3.38077229351808	3.5432448085591
GSS	1526.26057573415	0.361135830561757	0.000185544574981995	0.000865722722090438	2.79533728433618	2.68870272563307	3.43280176734019	3.64122882342786
GSTCD	651.498933218155	-0.619144118704334	5.97803280179175e-06	3.67983283325852e-05	1.01313806575015	1.21955703317736	0.705685637349165	0.749654266173254
GSTZ1	141.301442508306	1.0719460723769	2.37198167265555e-05	0.000132872955645218	0.371278131611831	0.365557660385495	0.78577056960294	0.768987601763156
GTDC1	912.194151372448	0.329806078584675	0.00454409285186868	0.0149715014523022	1.03586075874577	1.14527575783032	1.32293574537515	1.42411819873947
GTF2A1	3334.35110494282	-0.349432536689732	1.25667339871958e-05	7.3513216300916e-05	3.42143077488518	3.67082688994791	2.8264331606938	2.75399473370457
GTF2E1	840.499066175425	0.466890290819113	7.53842201471755e-05	0.000382382995818327	1.4629208280339	1.39816617180703	1.9155709377958	2.05734257530859
GTF2H5	699.214551112889	-1.05767227970799	2.06763129083729e-16	4.86999295665118e-15	0.815703765814413	0.736085998860297	0.365571159989186	0.383779723441408
GTF2IP20	218.708660614518	0.54164803787097	0.00796466640502681	0.0246094918811162	0.364294956709247	0.380157824021675	0.557838717000847	0.527900117257969
GTF2IP23	135.936790159782	0.625890284108041	0.0141160554537475	0.0404091039105581	0.633229466451665	0.645185966895944	0.94814227116961	1.03182860448305
GTF3A	1292.39826800735	-0.474770979732788	7.09341863499294e-06	4.31052863611251e-05	6.96588494547911	6.20038534163806	4.79480408798529	4.72342546325718
GTF3C2	1843.03995356932	-0.414925254837201	8.06077832494874e-06	4.85371955262074e-05	3.03883396519492	2.89998266757071	2.3060747170946	2.16365911586254
GTPBP2	4533.79450344935	0.396518474500676	2.29514763092811e-07	1.80756261322239e-06	7.97468892400415	7.55473808488842	10.0190921488335	10.5042346600853
GTPBP8	401.522734292165	-0.366003088011573	0.0180285941214653	0.0495850129277988	1.99842926531017	2.10372464828628	1.56015867469621	1.63179685159971
GTSE1	722.805753073622	-1.03769832492536	5.76290112392411e-11	7.63961552134861e-10	1.60126476969625	2.24801024833702	0.857445699192384	1.01989051079364
GUCD1	2786.20944492093	-0.362706194932045	5.91278944463499e-06	3.64114703051864e-05	4.86158991993865	4.92281760680361	3.81174473910766	3.82169014970094
GULP1	1959.60891059591	0.725465477808453	2.60816864204138e-11	3.62187367549292e-10	2.20233637983819	2.10367538833049	3.93052142657075	3.21083803086574
GUSBP11	916.311231718981	0.790294606672868	1.02990260518308e-11	1.49296568491806e-10	1.23713314203897	1.18067048788371	2.17633623694247	2.02114301206006
GVINP1	139.440434944324	0.637515921284338	0.0136440193846236	0.0392650014190568	0.0831303991565696	0.0703118998100219	0.129020191043477	0.111164022717925
GXYLT1	1850.90773635214	-0.951482632901227	4.84843689882957e-24	2.19872995125429e-22	1.9052866619991	2.10681587245959	1.0175929328034	1.06231577600974
GXYLT2	1128.84438271433	-0.783996742636212	9.53943237155896e-11	1.22401230226963e-09	6.26995601237892	5.10069337418389	3.2510748398559	3.39050942949778
H2AFV	3875.78053389886	-0.767757369048875	7.47176139237185e-24	3.33855879626215e-22	6.2900793667532	6.48865543113397	3.82456888633041	3.70192652233397
H2AFX	865.415938714688	-0.566037488426368	0.000217781445459513	0.000998351152510837	3.2995508532509	4.69374309716156	2.47431206780631	2.92979594267276
H2AFZ	4644.42008031914	-0.334623262348191	0.000182376395385025	0.000852249215222791	30.9299495250139	36.4371840630092	25.6220981354001	27.9334168856723
H3F3B	12064.6998943272	0.371452443947745	1.99993873593641e-08	1.87318552875129e-07	22.1741864342001	23.0861199262934	28.8224247875826	29.9112359797998
HACD1	424.424302233102	-1.22359593610962	1.74837175361124e-15	3.78905330682767e-14	2.69686955015803	2.90168933139554	1.18688986326191	1.21636460819223
HACD2	1567.50018043149	-0.542067431588603	5.82148149064864e-08	5.04218624891301e-07	2.54054094839105	2.33993354182326	1.74407077377925	1.62032877105274
HACD3	3082.94304377034	-0.584461995252199	9.67113042021015e-14	1.73259213848859e-12	7.03358445516798	7.15789131835531	4.70179850939475	4.79286980561189
HACD4	657.529929716481	-0.425447290105515	0.00140495839412452	0.00528058582967336	1.11589103754704	0.986059219405967	0.815244329494003	0.757042163289165
HACE1	922.400352724241	0.36637741550323	0.00157700777710574	0.00585195460424777	1.05206022057205	0.951925035615188	1.26716538720519	1.33014590090358
HACL1	405.05012013942	-0.379368452332864	0.0165110469095815	0.0460587265241207	1.23190404116167	1.23373831645286	1.01317935852848	0.886305374817113
HADH	699.759124665078	-0.389448383113218	0.00241442335230908	0.00856134859233609	2.26029970547946	2.0066390852895	1.65734812963501	1.61620391878415
HAGH	364.239862179585	-0.505532542759807	0.00374152451631378	0.0126229714527735	1.45697840715748	1.81437514516651	1.07259625015487	1.23430787492799
HAGHL	256.243747350145	1.0029007719182	2.92808538468799e-07	2.27072348974884e-06	0.600546655279966	0.705286920837639	1.27401912267716	1.34196524913076
HAS2	844.331366052242	-1.33084148257946	7.98413209989429e-17	1.95321956298863e-15	1.87969574994092	2.6657212620328	0.799874533140465	1.01073797220821
HAS3	95.4444806670474	0.865541108944438	0.00527276679154031	0.0170870036469882	0.0963295152396241	0.0728848638614298	0.1584216759889	0.153078378606265
HAT1	1128.3799989677	-0.347193375387242	0.000896693612711247	0.00353924899046746	4.51488817786825	4.8003284707942	3.64549916017318	3.69568038096702
HAUS3	568.095693935533	-0.32307521876747	0.0170379004113179	0.0472766727029664	1.57243749151813	1.61884379347826	1.22405556588806	1.33609392063047
HAUS6	1255.27821309561	-0.465246819989093	4.03536764279225e-05	0.000216397124000353	1.28402819037	1.53457583590845	1.05841054697824	0.984808972825496
HBE1	165.742908080296	-1.92754993295404	3.31895296336237e-15	6.9260348103573e-14	2.10657439905599	1.85093654271352	0.549992233621842	0.494025676411128
HBG2	17.639808268381	-1.75250477782512	0.014188197477727	0.0405926734617002	0.234175425329295	0.341627629469602	0.0920413582107102	0.0779117149182674
HDAC10	1289.06944545144	0.349938071865065	0.000993305314003671	0.00387612918583451	2.48592877605666	2.67116467804967	3.10250125885939	3.489360081901
HDAC11	453.839318352435	0.466857688097498	0.00154163222854474	0.00573048123710587	0.761280240776866	0.768950106940469	1.07272476280685	1.0484972212602
HDAC5	2510.71311994459	0.389273263879555	0.00102641139190627	0.00397888284405208	2.82149076852077	2.19502058182307	3.56775595536196	3.03342687730565
HDAC6	1457.53094983954	0.672511564835377	4.8074369164989e-11	6.46323731287179e-10	1.21740594606552	1.0992583089147	1.90007377289477	1.80978012124334
HDAC9	2535.56283746211	0.392079350988239	8.64183453412745e-06	5.18100829686125e-05	0.891118812267343	1.00207918229168	1.2334793386001	1.25581246093311
HDGF	5681.65870779415	-0.335281707635382	4.47872455581982e-06	2.80928090223017e-05	12.4253148194447	12.7493165926708	9.67295571115042	10.3479528999448
HDGFRP3	1436.59034760243	-0.532198145094691	1.51941987729237e-07	1.23703251746118e-06	4.07420983419049	4.52098692109202	3.05838988059401	2.89489315316923
HEATR1	4275.57445018855	-0.359906961167534	3.70974703675413e-06	2.36800323455331e-05	3.53511321444328	3.43627403414502	2.81283771704857	2.63679819957506
HECA	1003.09869031123	-1.3618853794299	2.25195856177682e-34	1.89015218069135e-32	1.62731298501825	1.53395374037855	0.619645806335118	0.615155680630361
HECTD2	897.793480114243	-0.441641208566045	9.47016298059378e-05	0.000470319437728607	1.00950367258207	0.969257710559643	0.736660096049422	0.725842136341789
HECW1	788.074587742997	-0.659835334867278	2.4505941351558e-08	2.26181203531512e-07	0.881076905521385	0.855473997943464	0.552799939831104	0.550430202800902
HECW1-IT1	540.301850162733	-1.10642263059434	8.20330691140471e-13	1.3400498773985e-11	2.74006895173234	2.19313234725979	1.20694798980494	1.09604391503937
HECW2	704.039653884603	-0.548484268037492	3.1822523200632e-05	0.000174278216461428	0.654759793014349	0.767867976034164	0.465520047196636	0.508894176192516
HEG1	23000.2434637198	-0.869850436083113	9.16603379590035e-31	6.66269786733579e-29	21.0860571124532	18.8660478539568	11.2535136643415	10.6846629042204
HELLS	1179.90812261506	-1.28260093137762	1.21269765685994e-30	8.77300133476959e-29	2.84688310335696	3.30856897846132	1.2552669752628	1.27946008170957
HELZ	5801.71538508528	-0.367751708228626	2.15345484016177e-07	1.70303414532731e-06	2.87988037525466	2.93640006676156	2.29205203871546	2.2290169087882
HELZ2	8870.45391929096	0.83464095534442	0.00235061808108931	0.00835922047937939	3.2422048866946	4.50861594027964	6.16986055108922	7.69075314467914
HEMK1	1154.14864682514	0.5194794022656	6.76565209891879e-07	4.91553260099351e-06	0.911739895433121	0.976475977924184	1.35062920164735	1.36186831702092
HERC4	9316.53800404887	-0.857447557980365	1.02123590265821e-31	7.87543950923022e-30	11.4705556927508	12.7011570577276	6.58137103477237	6.797594861946
HERC5	260.302567386719	2.11856500365369	6.17679903074314e-23	2.52252502352284e-21	0.151701476499563	0.191073071186789	0.675292636946174	0.808580423126503
HERC6	3011.84084785241	1.15414735534458	0.000495156473775069	0.00208512850522391	2.36162514307404	3.55506343421591	5.7913634341782	7.40787850963465
HES4	124.147391420812	1.14105707208226	8.40570798479364e-05	0.000421589685391169	0.393820018173978	0.526648554756864	0.863064735837352	1.16286043832158
HEXA	4091.48233606973	0.813530347685067	4.63297889715027e-23	1.92306599468598e-21	6.37688176591108	5.75501914405893	10.8299754245178	10.5836155491082
HEXB	9420.91528684176	0.498151999126054	6.94656227757403e-13	1.14336049968477e-11	19.0014571731189	20.4556085050016	27.9620286585174	27.9207836013255
HEXDC	367.889509736892	0.616364343417945	0.000137536773439623	0.000659135224635568	0.802954109571746	0.785960008150024	1.22334383265209	1.2219044254067
HEY1	83.1817347965461	1.39994044393666	4.63385242869179e-05	0.00024520197177529	0.0938790931256114	0.125542853168644	0.255452256787289	0.321552043755483
HHAT	177.846874658859	1.03295185586803	5.4609917701871e-06	3.38349865304578e-05	0.178557284179657	0.184322563334053	0.371835936274767	0.37259773306761
HHEX	1319.84990778195	0.578507238082919	1.0833620072614e-08	1.05367705597408e-07	3.65494720124529	3.75541147320208	5.71294797580747	5.38085255629493
HIC1	2277.6553794636	0.981098316204948	1.91192544675589e-18	5.39887943998429e-17	2.59961116340038	3.31272643596707	5.46009278239647	6.22355497888705
HIC2	995.840965314337	0.645004697846141	3.56596424577652e-09	3.67531403133222e-08	0.693980733686286	0.71313175802417	1.0874721685593	1.11952232799531
HIF1A	7116.88012306828	-0.703989783160219	7.62672511809774e-25	3.64355999981575e-23	12.2870433691038	12.4112365581878	7.65415516034495	7.55491906299494
HIF1A-AS2	1031.14871539705	-2.27037468012048	6.04644414274802e-73	2.96314772311703e-70	4.63230047232934	5.62418296142697	1.03938073989189	1.09071652487542
HINT3	907.268892620575	-0.517280914993021	4.32759039048185e-06	2.73026383771596e-05	1.96876457021444	1.92056434399931	1.33540325134065	1.39298894650796
HIP1	3988.20672200102	0.501243353714839	8.65760847222514e-11	1.11842166590174e-09	2.58723068173515	2.46587127469982	3.62891371433926	3.55004753251365
HIPK3	6294.9416677486	-0.814481577908029	1.1357194120628e-24	5.37503093708972e-23	6.34486090932112	5.82740287587047	3.59926749947165	3.34594346975733
HIST1H1A	102.010107642706	-1.92184580863487	2.6754904329465e-09	2.81677412732662e-08	1.10446245736294	1.44510091151226	0.399749407235249	0.268987452385075
HIST1H1B	2359.78376302777	-1.0899675806173	5.12223222498978e-20	1.65567982897967e-18	21.3112976156164	28.7618391377305	11.2754159049571	12.289956638207
HIST1H1C	3462.08029158162	-0.749938120544938	1.93633484821597e-11	2.72883107737449e-10	31.2825737238048	41.7996222521134	22.451678685833	21.0668700357927
HIST1H1D	1936.36938892903	-1.02322778914811	1.75885190062948e-17	4.56760308963472e-16	17.5467314676759	23.6144602930877	10.2837560768399	9.98915672988695
HIST1H2AB	362.111335292071	-0.926248475956646	3.6280952664405e-07	2.77325015985835e-06	5.203898340651	7.06346756116315	3.29303526042763	3.15434234703819
HIST1H2AC	1500.08492764343	-0.547596469171739	1.94994105054951e-07	1.55667390646076e-06	18.5260210569577	21.6587067973602	13.3212165748809	14.2257373541151
HIST1H2AE	1303.38327759847	-0.700766076622253	6.02827519063675e-09	6.03304062557006e-08	15.4260985412399	19.8344923136886	10.8202449883772	10.8925481473255
HIST1H2AG	1092.20377729559	-0.75149321036361	6.79764544120589e-08	5.83115920625635e-07	14.168318580089	19.7469173324315	9.63883717551197	10.5233421192153
HIST1H2AH	818.996571529313	-0.917181708795573	0.0033049438359112	0.0113108147680025	10.6824889450632	16.7526862135599	6.99782218246502	7.55468271057794
HIST1H2AI	578.591755854252	-1.10074822618485	1.34529961839578e-09	1.47246338635942e-08	8.03161791926305	12.7223209699875	5.00300713190967	4.66089391577284
HIST1H2AJ	397.361682914377	-1.0891768492543	4.07313935685346e-09	4.15296195364549e-08	6.20564877122631	8.97923607544319	3.52252131958575	3.60845268037033
HIST1H2AK	271.136032773799	-0.672703307082031	0.00254452234296536	0.00896275989666814	3.45357844659551	5.4843612342533	2.58756270517588	3.01171121482429
HIST1H2AL	600.858025395025	-0.66189984229269	0.000242125071537756	0.00109605604493492	7.40716800139992	11.9183522062965	5.95762170103453	6.24559784713561
HIST1H2AM	728.975052714398	-0.719196322343403	1.25455268708612e-06	8.67508621857641e-06	9.68438001259137	13.2745191065217	6.80142167952532	7.14682001174935
HIST1H2BB	400.862084698627	-0.93382522329103	8.55978679482457e-07	6.10517751112558e-06	6.20564877122631	8.85708600842593	4.33491306338563	3.53052145756664
HIST1H2BC	1154.62960990214	-0.612656041226294	1.44291386549498e-08	1.38039971313601e-07	18.4185922433658	20.8414953176232	12.7969008925973	12.9241615890291
HIST1H2BD	1249.19289866781	-0.683751318923859	2.1600384364932e-07	1.70735192129057e-06	9.42739673956332	12.6167296044734	7.27479501620819	6.4493661646063
HIST1H2BE	495.885339265505	-0.779138252808609	2.07743019786835e-06	1.3787819819142e-05	7.51810782169257	10.2446076231492	5.22583325307614	5.11656082774746
HIST1H2BF	360.660811288943	-0.96798997129792	6.60182938271749e-08	5.68108315178125e-07	5.88815046200078	7.79692236668936	3.50549144980652	3.48591507747104
HIST1H2BG	1271.97165677695	-0.715131023725716	1.50422078404789e-09	1.63697150080627e-08	19.9307548373169	23.9428839267433	14.272007632281	12.4681775203874
HIST1H2BH	879.091990123771	-1.02104887847834	9.22013666033046e-14	1.65962459885948e-12	14.7767448387789	19.370152619307	8.08058154719534	8.76387633737104
HIST1H2BI	767.978945038676	-1.15484795421296	1.99066408897784e-13	3.46813862841185e-12	12.184088434124	17.7178290566424	6.88751591498498	6.53533537988186
HIST1H2BJ	1127.55914093357	-0.649915890061251	5.65451265630103e-06	3.49627009664327e-05	14.4884481706594	20.8071468316717	10.729994013113	11.7805833518075
HIST1H2BK	2469.33200179304	-0.384458661624878	0.000337403186891837	0.00148273914239537	17.1057623964468	21.7338112194357	14.359593318233	15.4459645435464
HIST1H2BL	399.20478915766	-0.789311222239395	7.61094721731721e-06	4.60659402890371e-05	5.84947466956652	7.91399634360707	3.79055977655411	4.17375894661079
HIST1H2BM	450.790637126002	-1.10729595799771	3.07143432410793e-08	2.79575975145882e-07	6.38653091029793	10.6431815550266	3.87192816759943	4.02284736994466
HIST1H2BN	549.917372154609	-0.569963338189517	0.00042111852819614	0.00180418293298245	7.60157421865139	10.4426905168095	5.75822216511993	6.39860803938169
HIST1H2BO	987.744309136394	-0.934144466925379	0.00297444831140868	0.0103144986868114	13.3016154603802	20.9155785772105	8.63868259471872	9.30091951150232
HIST1H3A	439.970543331412	-0.846586283743812	1.5209230806444e-06	1.03428215940688e-05	6.27180707369141	8.59951041921269	4.44133897157054	3.8134586583596
HIST1H3B	1168.40817861323	-1.08838022205603	6.32441863305913e-16	1.43833185439273e-14	17.5782889981559	23.9115214383702	9.3119724123645	10.2248809130687
HIST1H3C	1381.70534953781	-1.03405400024778	0.000561394276986653	0.00233663064547431	19.7526205986092	30.0850638053753	11.4993545271272	12.8895087278972
HIST1H3D	1215.48202169218	-0.832852219587329	3.16966996672637e-09	3.29593608039063e-08	8.53697827702903	12.2993828896924	5.77332167625704	5.93057460166267
HIST1H3E	636.741193440542	-1.10885127123486	3.28518175713354e-13	5.58260416715579e-12	9.89948732552769	13.3102598136505	5.24775198404398	5.5180508330655
HIST1H3F	998.891079582297	-0.926138466486973	4.02660597412227e-11	5.44721264103878e-10	14.6485271423797	19.9631925828373	8.56300653190372	9.67421906091626
HIST1H3G	995.983700653528	-1.04661168985735	5.50248189016159e-12	8.25209327495902e-11	14.2450866868407	21.182132254915	8.36709160625114	8.79028079322376
HIST1H3H	1332.46286540107	-0.812261686715034	0.00363043405006692	0.0123079542163234	17.8559999527252	26.3698792014719	11.8912375452395	13.3482698558808
HIST1H3I	508.182585632955	-0.638472641985789	7.3478829645794e-05	0.000373716230324373	6.83011657210443	9.16858966683001	5.25658423558945	5.01123821925689
HIST1H3J	562.096302734367	-0.860713403632536	7.81013929426613e-07	5.61000643775372e-06	7.45197153699561	11.2501266014247	4.94962994310943	5.34522447929065
HIST1H4A	248.308086245416	-0.968255972834679	2.13745313178367e-06	1.41552693888655e-05	4.98787360913083	5.88940319297999	2.47843625052872	3.09837820862299
HIST1H4B	1150.05144318642	-1.00121393506546	3.00514794939759e-21	1.07169501519362e-19	25.5526714109319	27.3369089385381	12.8855323305689	13.6140355415026
HIST1H4C	997.160586826053	-0.903572317474324	5.18342983695133e-14	9.49899470240828e-13	19.0306562317607	22.0234850171052	11.5950871032062	10.3656542358055
HIST1H4D	854.07548674374	-1.32443035322155	1.43395867498508e-28	9.03929468480219e-27	20.1049492887959	20.8485164802767	8.59997333624922	7.78185711446423
HIST1H4E	1663.36450520021	-0.771355480265975	2.67995375122716e-14	5.07654082152656e-13	34.0734561178739	34.4275168083484	21.5313301414296	18.6901059278883
HIST1H4F	446.698807382178	-0.936669546180263	5.74426985021406e-08	4.98549613272279e-07	8.22922989227837	11.4332695138422	5.15656707127775	5.10694883251454
HIST1H4H	1248.05158851414	-0.805030484450151	5.63754135048812e-13	9.38067121540149e-12	23.8436291022786	28.4463614116931	15.0128314837646	14.9536069018682
HIST1H4I	582.95920435318	-1.07119264005043	4.11367453194135e-09	4.19147843656962e-08	10.1135302947283	16.2161171700566	6.18343794876655	6.33767054267078
HIST1H4L	339.515873541281	-1.21535334342929	1.19083326386581e-11	1.70832284652025e-10	7.10921850989388	8.95986502248691	3.45761959388256	3.46284396119906
HIST2H2AB	396.023574251062	-0.389411495835704	0.0180007371822365	0.049541159288503	5.54075783145207	6.81679298148496	4.58419380749013	4.85402592421457
HIST2H3D	247.897631343987	-0.592602773139425	0.0100624373736693	0.030151587491279	3.10961393569108	4.93927269974212	2.42308442151653	2.90724069271878
HIST4H4	426.047873080161	-0.742447783163727	1.46422740514072e-05	8.48057290846278e-05	6.77801443459185	9.1849739117349	4.81899062612435	4.71313871076871
HJURP	784.088099087024	-0.950425718888517	6.79709321782456e-12	1.00841250161319e-10	1.76692664919206	2.22495840288969	0.963706789167643	1.10565188946983
HLA-B	27591.5983715124	-0.424665026875029	5.34485730275521e-08	4.666613341578e-07	19.6441590215169	20.6239891868157	13.8947218845061	16.2075631358431
HLTF	2758.90676732956	-0.659114902869021	7.29425291398068e-16	1.64902217662492e-14	3.85384109478821	3.83914900962207	2.38042047832847	2.50899799121187
HLX	194.295475793832	-0.521875098402642	0.0149304362657999	0.0422823836044903	0.642903033366729	0.593805458019951	0.438994449938265	0.426210085346073
HMGA2	8961.50561836666	-0.964322374036052	1.07951782168104e-26	5.83631129785705e-25	10.7720309031985	13.3201263234627	6.14183458459443	6.23556769465023
HMGB2	1336.20277229231	-0.853494588865189	6.74501221131485e-13	1.11139073225917e-11	5.72511456510594	7.09381092399776	3.34066141996961	3.76803653869425
HMGB3	517.662891071805	-0.480091657374073	0.000669466423503249	0.00272961189099875	0.8987491323845	0.998388204118203	0.67783817111908	0.684528546115873
HMGCR	3168.43359090824	0.746265910530637	8.06654262589716e-18	2.17667700839484e-16	3.35202547114472	2.99926989320682	5.43393537588294	5.2676553406955
HMGCS1	3290.27467089057	0.963144496964987	1.69452557415959e-26	9.00113025266872e-25	2.54770717913729	2.22560104999404	4.80263349462119	4.54640314126364
HMGN2	2092.97275137747	-0.336355904077143	0.00141362318879057	0.00530790002078751	6.52711965729289	8.08797050988473	5.63135113371562	5.96329301808783
HMGN3	474.509200854192	-0.374947376001429	0.00994027337689799	0.029820820130694	2.3091767876604	2.17347022598071	1.68911545608866	1.78445652775303
HMMR	646.065368543322	-1.09206087086578	5.85212058207392e-10	6.77632743009657e-09	1.34106795533503	2.11033255724381	0.773182561621097	0.845709100300754
HMOX1	753.978786907304	1.75250352696106	1.40201012099977e-39	1.47912067765476e-37	1.27625606804466	1.39877534955054	4.21856225132422	4.81007449976653
HN1L	4063.66613586422	-0.526885614864562	3.57828338209666e-11	4.88421214203167e-10	7.61594690359569	8.42263302145157	5.54044992504921	5.61923435756653
HNRNPA1	9892.3545123175	-0.500150713076567	1.98708596601186e-12	3.11214536037651e-11	34.4462666182888	32.0037644153642	23.4748782063496	23.6796156620621
HNRNPA2B1	14452.7586917081	-0.322805532569365	4.27215146712072e-06	2.69864969182944e-05	25.4025935924267	28.0142923086145	21.1691394494106	21.6606695140455
HNRNPA3	7473.36536917863	-0.394113111487975	2.83854769371786e-08	2.60248742081845e-07	8.6804315944503	9.30426180856846	6.93022317479754	6.7928572422844
HNRNPC	8905.63114656561	-0.35416232703901	2.0268706911313e-07	1.61140204881518e-06	18.4814601320193	19.3432288142463	14.5700734169537	15.1129081306066
HNRNPH1	9820.27550139678	-0.325535477080536	7.62425536671667e-07	5.49206673926789e-06	29.4266986929024	29.277394606563	23.4046704546013	23.5964091747478
HNRNPH3	3018.79096782625	-0.399330321628696	1.44604751485672e-06	9.87785694501044e-06	6.99992015401595	7.66543533866359	5.49748378765511	5.65024444973104
HOMER3	1452.9946638429	0.509196810447648	1.28016985268884e-07	1.05411059089696e-06	2.72917358190965	2.8445540525756	3.99241986555057	3.96096805707355
HOXB5	529.214807690548	-0.998641421701998	1.04253511152813e-12	1.68850676059013e-11	2.290058195642	2.479129735071	1.17065892230547	1.22224270185071
HP1BP3	8911.219563303	-0.37244115083428	1.24879395744825e-07	1.02994993493778e-06	15.7064163238077	15.8566422106604	12.6265673189152	11.8276977615645
HPRT1	1020.98013069507	-0.36446923172886	0.000947322050725436	0.00371399137925699	4.88119228436388	5.11997811151999	4.04045300820952	3.74374737640702
HPS6	1069.35726544835	0.38975679495304	0.000487584856662195	0.00205817981172883	1.99268212788629	2.27655329263208	2.73485463839114	2.86653221821786
HRAT17	29.9239875850131	-1.51788763644948	0.00612139139929377	0.019463411079546	0.386207278548738	0.387351129382701	0.172496180522194	0.0963702895276164
HRH1	2641.72070734276	-0.423175807172884	2.09443962370534e-07	1.66068511290875e-06	3.89881669375302	3.83070128813174	2.87649303234979	2.90843720267381
HS1BP3	875.807436320674	0.51568621243973	1.17620530381439e-05	6.90719403770709e-05	1.936844185776	1.75091268460005	2.66950580961109	2.62980002415993
HS2ST1	2011.95422758127	-0.84630882860498	2.15763965514172e-21	7.78595288382732e-20	2.13631487637123	2.24459109992102	1.1891642127642	1.25513735124817
HS3ST3A1	593.919516004904	-0.420579918815922	0.00439094978560963	0.0145458589496253	0.873431394092582	1.12256826757444	0.724932555071352	0.766687735029096
HS3ST3B1	1634.53054300536	-0.509043596947604	2.99631992756264e-05	0.000164987648929074	2.44433609933303	1.92714360036956	1.64955158609558	1.43627721535139
HSBP1	3366.05094442879	-0.334999812630087	3.87658521372604e-05	0.000208766687582155	11.079064246669	12.1664265056131	9.1236169858339	9.35169731121909
HSD11B1L	114.09061646856	0.781534155852769	0.00529331624651565	0.0171426263945994	0.222256977668803	0.265933980181686	0.420692334253383	0.417407790314949
HSD17B10	772.673075711499	0.362207284625504	0.00306479403045764	0.0105867100751961	4.12421102137574	4.52421584847302	5.3796883574746	5.76035976272207
HSD17B11	755.152441830862	-0.46191900585914	0.000347041798374462	0.00152025922748121	2.91043940780884	2.79701964042958	2.24391661002942	1.91065887793569
HSD17B14	60.5811555725672	1.0888771342629	0.00471644993994807	0.0154556314684407	0.215717782669953	0.167718360937734	0.402243801525545	0.422278975480617
HSD17B2	1230.65272265823	0.468307777072263	2.11610942667232e-05	0.00011959797027532	4.66072784282478	4.18986196472812	5.82729628353708	6.48553903487266
HSD17B7	253.041788203637	0.632281819015703	0.00103683394006027	0.00401518766693746	0.73403959751077	0.659154243079241	1.07598977501412	1.09662964796459
HSD3B7	803.256896918929	0.507295994404139	0.000222323038729046	0.00101763531315808	1.48486717864919	1.95776838690104	2.3878113838247	2.50225037992129
HSF4	292.21216701598	1.11479261816036	2.55313729890104e-09	2.69169062074286e-08	0.471705158699021	0.393063161917756	0.929800534988027	0.958592349619397
HSPA13	3226.62696990883	0.391815545091623	1.0494050166742e-06	7.38423391075239e-06	4.24400365036702	4.37628621608541	5.81687067373352	5.52397674843586
HSPA1L	71.6695591482126	0.840923334544779	0.0166242690980103	0.046298056120435	0.0273958479455005	0.0222432757566235	0.0453785300945827	0.0443124797983606
HSPA2	1999.10771096428	1.11472377478003	6.52792685371281e-28	3.91985236211878e-26	2.97844247633072	2.62837264203597	6.42497875402903	5.7741894144699
HSPB6	686.50286423243	1.20685712128257	6.31176551695444e-21	2.17433881482022e-19	1.70442818990531	1.79615796010062	3.93930708939223	4.16113928794215
HSPD1	5035.17201121438	-0.466321879860667	1.58645636883204e-09	1.72030300894335e-08	14.4187077361005	15.0984640149632	10.2289838506717	11.2064615797238
HSPE1	513.459025282999	-1.06499188769712	4.25116672707076e-14	7.87606401434867e-13	4.40190825744909	4.57168925716633	2.09869749624211	2.20439874410014
HSPG2	52044.3099562887	-0.692302906421715	1.0380960706999e-26	5.6324126807403e-25	27.6115243172363	27.559359457983	17.6469266779898	16.6027532788699
HTRA1	2705.94257865903	-1.1646364284447	5.01100770259881e-29	3.25330038537954e-27	12.0014905481264	9.70791847076118	4.91270749449666	4.81543093016716
HTRA3	166.993235235844	0.686774312535356	0.00465394329650658	0.0152721042473607	0.242207462389673	0.223294532651424	0.421180384290051	0.330730276836115
HTT	8487.46179551539	0.423425029229129	3.36540552880007e-10	4.03529919443809e-09	3.34206999130162	3.27945094309722	4.4354440224322	4.47525685508027
HUNK	351.377080728543	0.496351920200288	0.00252850933692342	0.00891255541683076	0.242007697510248	0.243848189075992	0.346130345325368	0.341360921293557
HUS1	1240.98568894769	-0.500036929137877	1.30182676632345e-06	8.96932074103666e-06	3.01705525625474	2.79862002135592	2.05122023961683	2.07909628259414
HVCN1	62.5647273026961	1.51392063763044	8.64194458981306e-05	0.000432723870166249	0.106050227071673	0.114370238412336	0.295810980357465	0.334909777309567
HYAL2	1124.28095764116	0.621427158482231	2.74847216822406e-09	2.88760644395989e-08	2.24514354632431	2.2732878880939	3.49944066569631	3.4730446529677
HYI	1183.62051996518	-0.83078558748865	2.21880131652822e-15	4.7276338850907e-14	6.82757553176619	6.81137267600685	3.68273162303804	4.01642157224189
IAH1	1209.42468870957	0.735599420285565	2.20203195701696e-11	3.07474903409941e-10	4.58616075471691	3.99922172170795	7.28912289700569	7.08525026958277
IARS2	4476.97418592024	-0.376091825326053	3.71293632260651e-07	2.82741496807208e-06	8.76729302308502	8.768707205409	6.62521424866386	6.93368709994767
ICAM1	1975.10073773581	-0.678160492619284	3.21059231118752e-13	5.46196174597545e-12	4.50033801832001	4.7169161432601	2.73515385489991	3.0453105505694
ICAM5	702.155713674314	-0.49485651119201	0.000106256450370882	0.000521397930889676	1.77776746943858	1.58676095354439	1.20411067988315	1.19532973150921
ICE1	3944.33981631792	-0.3394208265377	6.65321844757677e-06	4.06416142563676e-05	3.36985154713296	3.45396508346132	2.73799879791556	2.67103105989386
ICK	1362.20487894913	-1.03658024465573	1.5726326496952e-19	4.9464669180475e-18	1.84339005660185	1.77069183847932	0.972041141000862	0.793692809860715
ICMT	4513.84612912538	-0.43766112619872	8.83494038676122e-09	8.698665868806e-08	6.4054152425742	6.87336106808015	4.98051750759795	4.84884326393309
ID3	399.68229868774	1.10515499302621	6.63589233707954e-12	9.86423447993271e-11	1.19204552667624	1.33288312779711	2.77966387532555	2.65331363525682
IDH1	4313.96876458178	0.56073355263834	1.34962695530362e-11	1.92521433849508e-10	8.12915443134752	7.28710405862788	11.6174992872223	11.2168005531571
IDI1	2182.66204656196	0.661958274070778	3.24657459485301e-14	6.10420312438205e-13	2.59750073843518	2.51142322353556	4.11608682609945	3.99720493733741
IDUA	593.080998741108	0.666663484911029	6.93443470930798e-07	5.03094231632316e-06	1.28141890767432	1.26089423635261	1.94863755584244	2.10422224376812
IER5L	563.492706859901	1.20111873743692	2.83751763002741e-17	7.196588954153e-16	0.790018017001136	0.759438640517111	1.68666638011147	1.89400216498175
IFFO2	1151.52076477329	-0.774432203577194	5.77662971030332e-13	9.6015928401453e-12	1.58677428734699	1.47769562547864	0.926313062479134	0.871863468261043
IFI16	6149.97712645315	0.380123175115111	3.3624153494615e-06	2.1589946740921e-05	10.5295019123082	12.1506531416598	14.4328588506717	15.1551910669483
IFI35	1904.50916947597	1.15714577996233	1.53964237510269e-06	1.04607544555278e-05	5.04891584026973	6.57257396336567	11.5008254242312	14.4807024993951
IFI44	2542.69175251185	0.925292860070556	0.00136678987122683	0.00515754389559813	5.19350709772381	7.30516382173568	10.4758396997845	13.3193884368169
IFI44L	5361.71624570028	1.87306400093883	0.000276084691429191	0.00123834621558673	1.61904797457949	3.18996851487449	7.4385187030826	10.2133270986238
IFI6	18298.4867941481	1.10959025398087	0.00105674809051748	0.00408605675519003	67.1797558838569	98.8221311352299	153.254640761929	205.946278270136
IFIH1	1319.67022455363	0.710641933727663	3.58179557249206e-07	2.74542415323768e-06	1.48246053979295	1.94558516592334	2.44587125922989	3.1716912299469
IFIT1	5954.68398854985	1.19480936171989	0.00270294072438642	0.00946153813015634	3.53595976939164	5.90106694718851	9.26010428656506	12.3944038186984
IFIT2	1545.24422274644	1.26307654770975	8.3293737638515e-06	5.00751271153272e-05	1.39205397328796	1.81170573187093	3.25352375319765	4.45615161781583
IFIT3	5144.78405874321	0.952797023018109	0.0138465642409427	0.0397274794992261	5.88432775348406	9.32763862520051	12.6173172761839	16.9014529463457
IFIT5	3300.45596710246	0.460248064469009	2.04539135431282e-06	1.36048973094223e-05	3.87199255259708	4.6122200017859	5.50459343492392	6.19295770662926
IFITM1	6742.32430560673	1.08126104728286	0.000150731613647076	0.000716045864454778	30.4310475308671	43.9241054037106	71.567226627585	86.1570997550849
IFITM10	83.37358618793	0.901263284514032	0.00765936389161835	0.0237665556048746	0.0636334916354013	0.0419313349640019	0.0978683189177637	0.102097750510465
IFITM2	1379.1614522226	-0.524270862365707	1.05819322307478e-07	8.8088062712066e-07	13.329393525045	14.1077976486384	9.35543668388315	9.77673286905288
IFITM3	13527.5589063865	0.588503395920285	4.87753578558391e-10	5.71314754468703e-09	89.0436279524015	110.181452400294	140.30644103447	160.058319351403
IFNAR1	3968.62190764616	-0.37973490102197	5.20520512081888e-07	3.8593204585398e-06	4.59160983089259	4.47073299489179	3.52216027809938	3.46687794092425
IFRD1	1817.43009175087	0.367313483731404	5.36795495981491e-05	0.000280144183268664	2.34998830945182	2.37048543210568	2.96841165264672	3.14214575990609
IFT52	921.849650671159	-0.340755900668137	0.0023934549391271	0.008497632025057	2.78468838039585	2.65231010377662	2.15971434092364	2.15079868141677
IFT81	800.809333108951	0.427456284186619	0.000456721520771919	0.00194030015200419	1.06844503420791	1.19253475881588	1.56579087356308	1.47778778450282
IGF1R	9183.35516029095	-0.447885568418566	2.67487557678057e-08	2.45539031797283e-07	5.53005219065635	5.12776510126236	4.14137966080395	3.69765751353988
IGF2BP2	7684.25882581139	-0.578368306747332	1.68751826738535e-17	4.40494459074197e-16	12.8143708049951	12.732540980616	8.63530196021219	8.52952951567849
IGFBP1	289.932217339982	1.02407891373463	1.15771320721225e-06	8.06586402324709e-06	0.838702833929374	0.578394556004784	1.30676415602673	1.61043514736059
IGFBP3	67905.2100327871	-0.732742676117799	1.22609572904513e-24	5.76682548472248e-23	200.368629082355	196.22288365457	112.489512634025	127.003102484979
IGFBP5	279666.391070257	-0.604716141539531	4.38279316827086e-12	6.67168274673055e-11	366.459524143956	298.847801467792	220.901797149784	218.224168290109
IGFBP6	3931.00088551689	0.515328055975246	8.59889323433858e-11	1.11178200864742e-09	21.3279026091836	19.8790913158868	28.9863581727353	30.1582557440738
IGIP	636.900572015844	-0.460164623270467	0.000722220373401458	0.00291885392729847	1.69893414635454	1.45971639571422	1.18259199640428	1.12527949558917
IKBKAP	2447.46891244071	-0.437501234991552	2.31160328379525e-07	1.81957912370039e-06	2.90056545245523	2.75900402807876	2.08962904510857	2.10564333115472
IKZF4	574.676519773166	0.409135508208991	0.00223514323600862	0.00798971671563365	0.558975150737868	0.55568283658185	0.751730190339538	0.733293454809538
IL10RB	1596.27636743718	0.326495617301427	0.000457091491475842	0.00194132902949427	4.40819415518524	4.48155434199481	5.51999388836665	5.66333938574811
IL11	582.703434436501	-0.524455895167438	0.000214182654180203	0.000983337226444742	1.77975292766036	1.77978944263731	1.34981090254008	1.12935537185379
IL18R1	236.557926807575	0.557869831656968	0.0105104389177217	0.0312780779702309	0.34883824453639	0.283468389294858	0.531379169981951	0.404685664211193
IL1R1	5439.22762365744	1.24812297018288	1.49281573693162e-56	3.4361904053735e-54	3.51151985054305	3.20750063708661	8.16036591110939	7.86558979284504
IL1RAP	1209.5566262102	0.519002561402266	2.42098567466308e-06	1.59426156781455e-05	0.918996403292495	0.81655576003762	1.29452517681078	1.20440968900399
IL20RB	267.352561161834	-0.635675567472343	0.00148421484562106	0.00553601569719497	0.973613516893278	0.981567198829998	0.538842320942271	0.727071285856896
IL4I1	77.9027155279055	1.1952913214462	0.00100063570731648	0.0038988606477435	0.104421974515827	0.129667257799986	0.211075614742831	0.325291554538313
IL4R	3940.00653480976	0.679231557854052	8.80130220411346e-16	1.96921035471122e-14	5.01280095250089	4.4584700246142	7.70985033811392	7.52278167982425
IL6	2586.33150722884	-1.53942840369652	1.79802818373551e-49	3.00171913926481e-47	18.7787420343753	21.0643315210957	6.17466689459824	7.5831557315172
IL6R	128.440713472784	-0.702393545247207	0.00775752636170703	0.0240318801971968	0.155023061459424	0.14284137218728	0.0839658331034187	0.100323942431314
IL6ST	65913.4153137278	-0.471708621686151	2.67985838856921e-14	5.07654082152656e-13	52.2417301677041	51.3305100948702	37.9958680642324	36.9323198202576
IL7R	3817.7976572665	-1.06512356613981	3.15062700746355e-32	2.45458079473775e-30	6.70075161884372	7.12245333974738	3.04250713161869	3.58813299241565
ILVBL	1433.89634626939	0.398214108620721	4.26698924733885e-05	0.000227532820798778	3.21863121596423	3.3144975927732	4.20642037331058	4.43069399943047
IMPA2	589.15788845929	1.34220875798735	7.17552989056388e-23	2.90695066926524e-21	1.34448994197681	1.32282537560428	3.35792265472177	3.43180954633523
IMPACT	1790.44412159454	-0.551275883549154	3.58721621131052e-09	3.6947110971003e-08	3.54042335431326	3.42945398809371	2.46895187753828	2.30255240191462
IMPAD1	6468.53677530078	-0.93930673310471	1.9193319106114e-40	2.12835696248237e-38	7.24078188576282	7.23353191617601	3.85532351358892	3.71610323307503
IMPDH1	2268.93427728878	-0.531471477297892	3.59068795938555e-10	4.28850090243595e-09	6.08766203042055	5.98052890966047	4.20933568007153	4.16857586074399
INA	69.4843228773821	1.15440392050687	0.00177766973632511	0.00650128999380141	0.065302401182821	0.100170063592932	0.184196664249598	0.181001260025032
INAFM1	288.507466792712	0.802275002946583	1.11652912241907e-05	6.58730502050117e-05	1.43207279335992	1.32992059282036	2.48600168474889	2.35362467432849
INAFM2	611.603239692022	-0.837803003721601	8.2935506475171e-10	9.31920276901478e-09	1.71705169008367	1.91556562500309	1.06916764186193	0.964801854718146
INCENP	1086.76782827422	-0.586166606895804	1.69495683059627e-06	1.13980131931952e-05	1.72129669245303	2.15574161737516	1.25308115393235	1.33249280911787
INHBB	649.562698648628	-1.38677931566531	9.39718370328804e-19	2.75071319499715e-17	1.99626330206999	1.61054421170104	0.776248958638221	0.60764148675862
INIP	976.39371766659	-0.422475935392325	0.000136100808022453	0.000653077534894853	1.53860236736139	1.61977007541707	1.2117160366827	1.14988801063819
INMT	295.599685582609	-2.20186203369328	2.48301094902979e-30	1.76270571671311e-28	1.14461360688504	1.19016199734508	0.228754606572926	0.281782985749484
INPP5D	23.2357894057925	2.9627927536623	4.54426012135472e-05	0.000240628789695437	0.00470392175192444	0.00786308934925059	0.0434479862237785	0.0527218106895524
INSC	862.434707714106	2.45148537253685	1.575429969366e-75	1.04060574324384e-72	0.541458215806256	0.469883330245492	2.91906661488683	2.65444935503541
INSIG1	4708.40810442175	-0.35127786433002	5.68348471230261e-06	3.51132573197646e-05	10.9429697416659	10.1356783610796	8.33773417523298	8.24858988043403
INSR	254.909172047269	-0.917757818481665	1.71540304322552e-06	1.1515865237597e-05	0.210810416542033	0.227835386849072	0.121420652979816	0.110996727819077
INTS10	1278.56919497067	-0.344048010409338	0.000729178236926698	0.00294227776238789	3.3942498803945	3.55331269993331	2.64315611508886	2.84787072673795
INTS3	4571.41051234125	0.417026347481373	5.46340987383145e-08	4.76191180741523e-07	2.3791283827796	2.22091404075987	3.07833948863444	3.08782097261354
INTS6L	422.220190737474	0.61740329182628	0.000126765376727241	0.000612732931352289	0.546703465032672	0.517590717205764	0.747955631821442	0.894167523947311
INTU	607.786636421688	-0.391607012611472	0.00351234259683966	0.011939921398789	1.35292617485667	1.23657031926997	0.954785057249606	1.02980849998572
IP6K1	2413.88567259596	0.352046895505546	2.29964985626054e-05	0.00012901137598342	2.60629791172874	2.62108091232464	3.31693606842462	3.37735112903388
IPMK	919.150301195855	-0.696318151567892	8.40949326262491e-09	8.29591049648037e-08	1.06041413863447	1.22322336006456	0.737336372126268	0.673042947225529
IPO5P1	571.62069138452	-0.710943643848794	1.31776567692274e-07	1.08272018192592e-06	0.801891456463364	0.783180823880857	0.498443210099706	0.472979609278212
IPW	395.794292474988	-0.741180168456658	3.42956921434533e-06	2.19932526400736e-05	0.685684179479653	0.669726485817978	0.43164082038611	0.381213983959528
IQCE	1005.75350325467	0.447849032973279	5.68999595442681e-05	0.000295833054550486	0.709709172448367	0.744061499858793	0.951941420006344	1.03705845269453
IQCG	246.04071981587	0.566192891206486	0.0035007603064854	0.0119058765561061	0.389536550581151	0.426711349875345	0.610791984787267	0.599061745240508
IQGAP3	2436.06911960862	-1.05080731394663	5.63826271927473e-21	1.95117282986838e-19	2.89979754213946	3.78871786703355	1.57823858343659	1.65587337021486
IQSEC1	1859.12552898727	0.639006930650816	1.67262697087933e-12	2.63868628677039e-11	1.17065097216669	1.13271011706812	1.81723015878058	1.7831823038845
IRAK1	3852.46291264439	0.936525516828978	9.44695193893463e-27	5.16252136173723e-25	4.274963869285	4.84536513044807	8.32475551879351	9.17100083558926
IRAK3	816.020477418735	0.59835708344199	2.10420439729003e-05	0.000118969382968479	0.436986063904732	0.522651135086314	0.644300548904699	0.811213906379614
IREB2	3436.87474080967	-0.487464562310742	4.55781759816565e-10	5.37596001174942e-09	3.3954143421745	3.42237061150181	2.49196608382166	2.38541968406281
IRF2BP2	3542.50779908967	0.366796693190294	2.22416766152996e-06	1.4710298264677e-05	3.98982093419183	4.18049686223861	5.32803598122642	5.23581594811828
IRF7	835.747170695532	0.869154740168246	1.18228710269009e-09	1.30343292192075e-08	0.741601151098374	0.964559433138901	1.41577087315085	1.70095476702541
IRF9	3564.69968160762	0.641625283567377	2.25368172498364e-13	3.90843981346478e-12	9.50251518214583	10.9281927621972	15.4451867737649	16.4957638736951
ISCA1	556.450814927476	-0.929107779226828	4.88784243020663e-11	6.56552627760381e-10	2.08611469682083	2.40422008468305	1.20858302929228	1.15144524835939
ISCU	1276.08631655208	0.384740042329069	0.00022321339777264	0.00102109543479733	2.09835227489275	1.90326066138644	2.6420551710317	2.60768860421422
ITGA10	148.710131614762	1.00748858155345	6.22909430335713e-05	0.000322007007521911	0.126020956257585	0.103950369509801	0.239789661066316	0.226293681377953
ITGA2	10343.1038407117	0.504269379020035	3.36513440321867e-13	5.69299797925367e-12	6.40256632389102	6.91069109181091	9.51771642314693	9.41756622852766
ITGA3	7312.3591185015	-0.639146751542106	6.03484448766556e-17	1.49561757678002e-15	11.1085426762786	10.6589318761312	7.33036753918141	6.69046348777748
ITGA4	2926.32145816698	-0.963785308142809	5.60803284009355e-33	4.50779020670377e-31	3.074476994985	3.14098708531419	1.62479064815294	1.57099587526726
ITGA6	6264.9946358045	-0.87715365915509	2.8600315748022e-27	1.63960753526019e-25	7.65775220263718	8.78075858644891	4.56271898036743	4.40808572453301
ITGA7	47.2461915825671	-2.10235387295735	2.48563078462406e-06	1.63470575238133e-05	0.113903818370571	0.0996671965686723	0.0243191080157916	0.0257322285278438
ITGB1BP2	213.140795821231	0.823420760862935	7.17522538549359e-05	0.000365669319209723	0.745452348493645	0.731477073642352	1.31277397416758	1.31094664781743
ITGB3BP	212.917219373843	-0.661262417309649	0.00178920052387242	0.00654031144337581	1.22424363513988	1.51013840376582	0.850365099455244	0.87870965381778
ITGB5	17841.0073449363	0.373012607740204	2.14658117782421e-08	2.00312415562072e-07	22.3100088160347	21.3787817893274	28.8647710727743	27.9054489123819
ITGBL1	5787.02011105949	-0.750916002250559	5.52286317144882e-23	2.27380317887942e-21	7.84659572102578	7.22600661759487	4.49870388102281	4.49166426953207
ITPK1	495.913722356157	-0.710330595345619	5.55166542922877e-07	4.09819733726159e-06	0.385830549354223	0.373658074622983	0.230897173786515	0.235152236340572
ITPKA	309.65677484241	1.03800859360444	8.55818288423984e-09	8.43164165871411e-08	0.634325374668347	0.718113964235723	1.3270581766032	1.45246461561293
ITPKB	589.529344350064	0.546202732327872	4.21421029360508e-05	0.000225034385871523	0.490449683801885	0.465977240623642	0.699825010530379	0.7030467022756
ITPR1	903.835739047251	0.8896169993667	2.24377935836727e-12	3.49145745214867e-11	0.370206151066127	0.391356597648228	0.640137671164354	0.775557986556489
ITPR2	2616.61859237082	0.458619638274312	2.26031746629842e-07	1.78197939532982e-06	1.12937579957945	1.0248896758925	1.51699636318533	1.45611642350838
ITPRIPL2	6945.11254509646	0.544832184836726	9.09179591418876e-14	1.64041049321087e-12	4.59841878683545	4.43014358899964	6.79550708415677	6.42045305259982
ITSN2	1827.38073145365	-0.468926603747464	1.85638535655665e-07	1.48510828524532e-06	1.90461289090175	1.97183524832557	1.42045305356173	1.38785445562918
JADE1	4725.10489916208	-0.444913505984851	2.03375558294691e-09	2.1743008315362e-08	3.84852982659243	3.75451199356982	2.73647925129173	2.86949632495451
JADE3	520.308847032074	1.07510569395239	1.17862769728006e-13	2.09423531895656e-12	0.384750223816031	0.441491079357391	0.864415619771706	0.876654825088853
JAG1	2255.43081888785	0.956108655795578	9.03783489663331e-22	3.35703637529714e-20	1.71129549378564	1.43740714308826	3.10845205001078	3.03379557419664
JAK2	1747.19767878755	0.43560909060529	1.54964703389944e-06	1.0514621589549e-05	1.60432305218309	1.62630558218975	2.18091990147979	2.2022983942654
JAZF1	2621.7790394416	0.919461262350909	9.83753618329272e-27	5.35669712174133e-25	3.62173999871195	3.34905517613817	6.61964095267669	6.6238231167439
JOSD1	2195.48888209811	-0.716263462104956	7.60377325280544e-17	1.86617969719904e-15	4.81457175409552	4.96714307142745	3.0263252169992	2.94386919829258
JRKL	972.014725661784	0.442324443681978	7.86285503776485e-05	0.000397116003104134	1.35411775708272	1.49004750251726	1.94307815207518	1.92759475190434
JUN	7919.42669888396	0.396335917346509	1.32641965636573e-08	1.27296067084701e-07	12.5924434740834	12.7340036838447	16.211217000363	17.2350683894774
JUND	2404.28884360495	0.738448927252731	1.17466582510824e-16	2.81919798025977e-15	5.68403285311508	5.60997497220437	8.97607205829115	9.94124012439452
KALRN	479.762432984311	1.21310136435375	1.44080464719768e-15	3.15854317463596e-14	0.0898763547196805	0.0810584137678589	0.207492744786036	0.19096345768385
KANK1	3327.31797661772	0.591001116231459	3.78393090366633e-14	7.06209806984015e-13	2.4290629374827	2.45143929202745	3.7322248416986	3.64190870444328
KANK2	8149.81455556375	0.587144844894005	8.78476528363452e-17	2.14562948856874e-15	7.64754262501634	7.48261823191279	11.6918236745298	11.1123587077369
KANK3	17.8951045603731	2.00625687169313	0.00927390841161993	0.0280153542631398	0.0244930522007497	0.00595529565783931	0.0647625057234312	0.0631547552797742
KANSL1L	730.539400498897	0.77982967536302	2.45145831093855e-10	2.99377449033589e-09	0.703908715774775	0.691121289728787	1.21980512216083	1.18392583727543
KAT14	402.894949234282	-0.403994204148766	0.00904517314620842	0.0274663742628819	0.753128372183651	0.713843864146282	0.55145881329208	0.562174631392616
KAT2B	482.390405859021	-0.608403190726565	2.91684009779511e-05	0.000160759764668431	0.710099113125399	0.777573472976364	0.501571978574451	0.475505338881876
KAT5	949.318020362851	0.42169871436458	0.000163149636796676	0.000769155415603106	2.06234039352504	2.22413821269272	2.88465984028567	2.86812500542872
KATNAL1	3382.30011083254	-0.838452111890797	1.40628939577581e-25	6.98181323549873e-24	3.3427480863132	3.62182343966871	1.94389812318064	1.96121204578791
KAZALD1	224.152145696413	-0.511286379827442	0.0149164284598861	0.042256003006153	0.483014407456074	0.388897005887595	0.321884469799642	0.293601054440182
KAZN	1404.71584300613	0.510708303082155	1.83405589782485e-07	1.47034180473642e-06	0.773718804952213	0.747662958723742	1.07218160732922	1.10428919314117
KBTBD4	522.121874659497	-0.389272492242538	0.00567757330530412	0.0182202008042097	1.35520580575765	1.23874498937101	0.987108317625658	1.00327639737645
KBTBD6	872.725191987422	-0.502211285849255	2.05435037804036e-05	0.000116454070683541	1.14545735735145	1.26512384962924	0.879903412779856	0.824304230015985
KBTBD7	254.134294788464	0.777500061822422	5.28182154481295e-05	0.000275933400649238	0.377820256418511	0.348179084666712	0.6278556245894	0.623306008260164
KBTBD8	220.609024768007	0.605257800062725	0.00360726271815604	0.0122434171613553	0.209417451058043	0.251690738762552	0.338618623489851	0.362594415031173
KCNAB3	119.050982131676	-0.850279947092263	0.0017959647369518	0.00656187981812692	0.355979038544715	0.411896643166105	0.220292640501875	0.205584069973766
KCNE4	342.126522011141	0.448871019027124	0.0080315216371881	0.0247896945778467	0.594178654000882	0.525366804516225	0.766682771842096	0.770752375695189
KCNF1	86.6371835329686	1.13188328110062	0.000553910054496057	0.00230800920129021	0.143686930919613	0.148644335721783	0.355901293806464	0.28525507463386
KCNG1	445.066169380843	0.812658639858429	1.64858036971375e-07	1.33077752267223e-06	0.8190338243105	0.975658501932864	1.5601424817428	1.59081157285764
KCNIP2	282.540881890633	0.478180685930192	0.0094787392788263	0.0285659605482899	0.54411847921622	0.50814531172632	0.772380397651543	0.699441129125859
KCNJ15	84.0975773800113	0.893828872619435	0.00817185492805863	0.0251513006618855	0.0910859020511609	0.10601769814144	0.15248493566031	0.214519286553127
KCNJ5	40.5753655163756	-1.41339133670708	0.00432036155523681	0.0143432982402005	0.158405660252069	0.0916034991287928	0.0572123240757847	0.0372123174434998
KCNK12	8.05809622344579	6.23171885612538	0.00029468964376883	0.00131365172187091	0	0	0.0719396289947475	0.0677829184124779
KCNK6	167.598523724515	-1.27845273505178	3.5024554177685e-08	3.16533627047823e-07	0.546938535769099	0.553246966613272	0.224157974459681	0.230962015918728
KCNU1	71.6195009090005	-2.00675077648583	3.87946945578759e-08	3.47505306440596e-07	0.166353790976369	0.205013987628045	0.046153721804477	0.0462581610945416
KCP	24.9401705088988	2.89904557678046	3.51421013857465e-05	0.000190875510994731	0.00459677686757505	0.00922078277688786	0.0560088709408137	0.0441607928585346
KCTD1	241.272910292219	0.543950273765866	0.00589099757131147	0.0188293783091445	0.283275830853046	0.288531116694008	0.441898659015896	0.39347212720623
KCTD12	1388.6992215827	-1.228860703286	9.15185503165909e-27	5.01931341664133e-25	1.74418827897382	2.09962413014849	0.772751912994329	0.871199314896261
KCTD16	407.802855035658	-1.28473055113787	3.82007907552477e-15	7.90662688220331e-14	0.741133820063494	0.630848846745984	0.28988677048652	0.276058207334849
KCTD17	584.527002465262	-0.357475751541565	0.00736138909896139	0.0229639061994705	2.19622337600025	2.38247065747108	1.78995946001621	1.79079481151783
KCTD20	7426.73254185823	-0.492874947095994	1.3660176820978e-10	1.72220254161243e-09	9.83693070035821	9.17746035914274	7.03296552266294	6.52458789156185
KCTD3	2918.47237772304	-0.905434790924855	1.28315848449689e-28	8.12239320686533e-27	5.88535722174366	5.73496080155569	3.17506143352226	3.04883233503304
KCTD4	45.7674333211165	-1.10941573710409	0.0104075993950509	0.0310389183371837	0.164000156294796	0.19973285958431	0.0828763149910501	0.0857433313777251
KDELR2	15297.3391889023	-0.623514644510315	3.9568282136407e-21	1.38827099819006e-19	38.7223804095471	41.1279152348419	26.1853158588439	25.7963440641068
KDM1B	1484.50655952877	0.433404878392694	5.90231270316146e-06	3.63616928574326e-05	1.96178574058122	2.05165391231812	2.7015741935922	2.73267800232444
KDM4C	1406.68623663716	-0.432731076835186	7.81678263166863e-06	4.72177183858091e-05	1.32444283559668	1.36795534984768	1.00812006514427	0.99202337881274
KDM6B	1752.92115421504	0.411168322905831	9.07318163787198e-06	5.41526073002289e-05	1.39312371728753	1.3690881825946	1.88971727110387	1.7954908109036
KHSRP	3550.10059719684	-0.793505598095194	8.20440452450208e-22	3.08518102812464e-20	8.08643770650567	8.97026120174965	4.81815269919635	5.04888888901312
KIAA0100	9861.08729800691	-0.34217185187985	2.47101281336073e-07	1.93802925454704e-06	8.86821026118282	8.77791178202446	7.02957045072929	6.93610713985088
KIAA0101	494.687023991131	-1.15468158493665	6.41655072121793e-13	1.05956781039938e-11	2.10075884008642	2.75187721282553	1.0859181697086	1.09365087603192
KIAA0232	4125.71602666883	0.391342182591938	6.85279434117432e-07	4.97646518313195e-06	2.87180080592833	2.71764880697966	3.76993531041593	3.58792892395065
KIAA0355	2260.29738432703	-0.525478039970517	5.72668622272533e-07	4.22124294496085e-06	1.81158292815539	1.57678813285071	1.27092920059665	1.09170733274816
KIAA0513	3897.94151377553	0.708517500320822	4.18150403856835e-18	1.15711128149236e-16	2.16042648860274	2.06144323753733	3.3054941168195	3.6221346459356
KIAA0895L	1152.86501265122	0.831679859494785	2.0796952122665e-15	4.47517417347771e-14	1.52403433058058	1.47668124176925	2.64570177077916	2.71700205809883
KIAA1033	6186.6072135189	-0.375992785408992	2.17214437853552e-07	1.71602794585084e-06	7.12555749707276	7.66934445033462	5.73806245546804	5.69343876286215
KIAA1147	531.020915025127	-0.688319789611575	8.94700920472965e-07	6.36343463662233e-06	0.285786456569633	0.266727824158742	0.176513525779092	0.167704138763173
KIAA1217	1428.94280559555	0.522136249388217	1.40045474014152e-06	9.596620844488e-06	0.72283805711001	0.84344834979399	1.06930137457949	1.18367303242634
KIAA1462	14873.4503099711	0.667847664368304	7.81475212205627e-24	3.48157519760349e-22	7.47613858417415	7.73207252532903	11.777424155158	12.4612803184638
KIAA1522	1425.84877840076	-0.501965775452533	2.57609379504195e-07	2.0142057094327e-06	1.81874436873436	1.85040681840864	1.25914088521898	1.34096123465241
KIAA1524	988.805851047904	-0.856821193914695	3.28385309119014e-09	3.40767050282518e-08	1.52776816173215	2.15396620881908	0.963056893672018	1.07166285131497
KIAA1549	1012.36250906526	-0.403200769782595	0.000173687142535307	0.000815406387328919	0.570777866380597	0.570965828181798	0.432195169845463	0.434048878525412
KIAA1549L	1891.51740843576	0.573430483978269	3.21193444625578e-10	3.86347649307346e-09	0.782915757196022	0.828442101469099	1.22752438594064	1.17563045065
KIAA1614	592.435357420488	0.532891499798302	0.000117929104362675	0.000573806392240902	0.734820504318495	0.699048513771282	1.10478427389717	0.977049001356954
KIAA1644	302.213516632427	0.532357629035475	0.00302952788837245	0.0104791866302719	0.225542790231486	0.22528748306682	0.305384515315346	0.34954661522586
KIAA1755	624.166032050114	0.484940215695591	0.000844606067145941	0.00335863960222244	0.558430963973422	0.43745510304574	0.709818016556677	0.694230804762989
KIAA1958	186.362019408771	-0.776965140197613	0.000616205503194665	0.00253558884196461	0.206800893447819	0.171353281609181	0.117938515062208	0.103880589578362
KIAA2026	2813.3791888543	0.460717119788344	3.00687557092004e-08	2.73863631135595e-07	2.08118370784047	1.96178425348918	2.74923090779853	2.83811996460746
KIF11	1751.97953020467	-1.056377372967	2.66264255825519e-05	0.000147900788830029	2.38791604942423	3.35183988339057	1.28727397796862	1.47927350634831
KIF13A	6669.36374496317	0.40446025030259	9.36489143806819e-07	6.63889084121008e-06	4.31703498406861	3.78555776730736	5.49510357199972	5.2725371689258
KIF14	979.774065100144	-1.05478980722144	6.14711778675763e-15	1.24688647833446e-13	0.963636541361239	1.27610970655542	0.516845680990003	0.562554005494868
KIF15	534.19743611297	-0.984176453315955	1.82106021099093e-09	1.96488257992715e-08	0.774904250117985	1.03283442392347	0.418534147993503	0.496530135008244
KIF18A	747.146692201063	-1.1025745856335	8.60007215950638e-16	1.92702501839559e-14	1.60920375297754	2.01776182163604	0.815614542134584	0.87552811549902
KIF18B	928.493624188336	-0.902816749549542	5.52940719476518e-09	5.5520657040894e-08	1.4309598122506	2.04516918994018	0.835969015877411	1.02595187085994
KIF1B	6609.32578320053	-0.399456443821322	7.47302246172364e-09	7.41058467614266e-08	2.90599186964269	2.87107402785103	2.19969421309195	2.19476525018258
KIF20A	1297.09558060417	-1.30478939439016	7.27182297462192e-23	2.93812592102277e-21	2.79799490837487	3.75605438439693	1.23957514575565	1.41822721601492
KIF20B	1534.14580577487	-0.895221315207727	1.99353993008187e-11	2.80684509896235e-10	1.58749154612766	2.22456745412639	0.968831617519341	1.08362663140577
KIF22	693.991444966005	-0.807084547000276	4.03958206522776e-08	3.59515704364031e-07	1.93366274134373	2.55845326492023	1.22206460379561	1.34739757704685
KIF23	1570.44247543572	-1.54726222467143	5.58381444176627e-36	5.01948573960433e-34	3.32534764936785	4.41795119994966	1.29456182684546	1.35883273064191
KIF24	245.604409561314	-0.596106179409986	0.00494644623548313	0.0161258393153347	0.243163369227432	0.342503140564343	0.187231071857245	0.199685523237908
KIF26B	130.133589065822	3.34415019595092	7.4000497217103e-23	2.98200412127912e-21	0.0127099821223273	0.00789138749832404	0.119180463978201	0.0951078864347261
KIF27	213.045671181489	0.570522028207701	0.00606238805490969	0.0193040870530681	0.236846722825055	0.212333590597844	0.338041022426329	0.332920993983774
KIF2C	960.203617687953	-0.9602998277356	1.20608438410788e-11	1.72694005309774e-10	2.0067076563453	2.76201543887315	1.16969460047034	1.28348438757765
KIF4A	865.303122119314	-0.943733405480959	8.05294333543082e-11	1.05013146053103e-09	1.32495633618051	1.79212192251089	0.751074660235765	0.87166652105001
KIF5A	145.753703357548	-1.24712119257872	4.81390082532398e-07	3.58494026168245e-06	0.328037887316556	0.319426655088494	0.132688824846746	0.141326192915799
KIF5B	9330.5260469281	-0.684004183171905	1.09434757146846e-23	4.84703449147195e-22	11.6652287141238	12.376892785951	7.50822417278986	7.50003946539278
KIFC1	896.645797774667	-0.906428281215755	8.47426968852153e-11	1.0966022581603e-09	0.764597218973316	1.01428610545766	0.446264229754225	0.503993810560101
KIFC2	605.970387357085	0.498407254525027	0.000224909059371029	0.0010279237153925	0.908236409260924	0.985884061754207	1.27406545111696	1.40815405449531
KIRREL3	532.582649940489	-1.02629068185402	2.61252321265393e-13	4.49484174933618e-12	0.996346523447948	1.07098936766815	0.490800698084568	0.527206725139669
KISS1	627.159997824435	-0.816153856246687	6.66058222947346e-08	5.72004325778184e-07	5.9449072262168	7.86865958817615	4.0788243909595	3.76135444575394
KIT	1134.50106180335	0.697255988925221	6.29394360710038e-11	8.28575314376681e-10	0.999905540031442	1.05978432650127	1.71716881703544	1.62897161778073
KITLG	3620.77050786897	0.955674280897141	2.33228691913758e-28	1.43449809212705e-26	2.58236165107985	2.99442506640217	5.41055392512531	5.4232898313527
KLC2	1551.64266689444	0.537291815337515	3.54499083217476e-06	2.26664565329962e-05	2.10145401950062	2.67315259640766	3.3098286396763	3.62484015322229
KLC4	345.123121878992	0.495087113467423	0.00542413515062652	0.0174954270081355	0.604396313326632	0.486493532986546	0.815553808934665	0.732621448344353
KLF10	2371.9160436768	0.419144305720921	0.000214586910597875	0.000984598111085146	3.05275098150476	3.90690261898855	4.3257645678156	4.99534081869854
KLF11	1058.91726431651	0.720240396636702	3.20803639621227e-11	4.41453704087471e-10	1.17728206437371	1.11267546357976	1.91221492156013	1.8767455863663
KLF12	3277.32468017639	-0.908168766957037	6.55855084229209e-28	3.9227363935473e-26	2.48248705084166	2.34073826602214	1.32765166412712	1.25121186214168
KLF13	4630.82724927492	0.583625538749384	2.12856322072525e-13	3.69990073790137e-12	1.61697095597305	1.58506071474945	2.51408715113722	2.29966303638485
KLF3	4719.94491039236	1.11465890804992	1.52980785699833e-43	2.05671158969191e-41	3.41172533513368	3.11995818304706	7.26646442812861	6.93573312288564
KLF3-AS1	40.0360477458536	1.5411362053234	0.00167116096671911	0.00615026099961162	0.0602744601934988	0.045558766254049	0.179224114319926	0.131874954542559
KLF4	885.212167288484	1.00153023756988	4.3874606392634e-18	1.20969695157331e-16	1.18341244549983	1.24661034464382	2.46112864290157	2.41435410557175
KLF5	1051.20115918977	-0.759461957570902	5.03628243777461e-11	6.74107513609444e-10	2.2677350804428	2.06969557395336	1.36105329860906	1.21007606388645
KLF7	8389.86333508009	0.429311344467435	3.35097888060993e-10	4.02117465673192e-09	5.03580011773162	4.87268527689459	6.70202052016275	6.68741890696062
KLF8	131.466819337127	-0.787762127903894	0.00331815935110641	0.0113483738995967	0.0761767134529001	0.07548182011399	0.0505026161298136	0.0373678654141476
KLHL11	1280.79953975392	-0.704735830229174	1.39868937350076e-12	2.2226871299397e-11	1.31751727859886	1.31945929275969	0.807216004024231	0.816152554902443
KLHL12	1608.34431815821	0.485073273660701	2.25077567254624e-07	1.77537819404582e-06	2.29312494882465	2.3720639662681	3.21351069421561	3.33573709778389
KLHL2	584.092413770267	-0.925784104411869	5.26700141921417e-12	7.92240451096056e-11	1.44278042059126	1.41120740347096	0.727514536739157	0.781366646256322
KLHL3	204.103099466841	-0.879372054488589	2.64159657200388e-05	0.000146839133267043	0.205672930703501	0.207599337948218	0.111501531089546	0.113916820761608
KLHL36	4390.78134020477	-0.39283006935051	1.56303215309851e-06	1.05865289656142e-05	4.25914880607516	3.8534796655892	3.15833729003975	3.04434305577224
KLHL41	22.3756816516422	1.57584294903005	0.0159639909653831	0.0447789333791281	0.0352593680183313	0.0202078843324653	0.0970094997050383	0.071433564514907
KLHL7	1282.19860975778	-0.411208025576903	7.06056228078621e-05	0.000360551469477997	2.28333912764887	2.1147199591167	1.61255650034982	1.71041959565516
KLHL8	751.118000970109	-0.928212990457777	1.30501409100022e-12	2.09132637874213e-11	1.11731359837249	0.95121809343399	0.560817083364849	0.53150722431132
KMT2C	11946.0049109509	0.493067112925221	7.84254164571538e-14	1.42346347289974e-12	3.63425344655793	3.60896691333334	5.1871653596285	5.04006364908324
KMT2E-AS1	659.970167602413	0.370054404543955	0.00349880077082582	0.0119018766928764	0.961875559540079	1.007370518375	1.26155464949752	1.29012601993862
KNL1	1897.50057280607	-0.869964006983608	0.00039993231463721	0.00172362318410454	1.62630795383862	2.3054956546246	1.03530658787358	1.12078688520787
KNOP1	671.908465887664	0.33321973784781	0.00827161313785518	0.0254017276713758	1.82350602354496	1.93210863724943	2.39156489118988	2.34974240682445
KNSTRN	718.319322936921	-0.620882507596849	1.93541380362275e-05	0.000110164130777958	2.27713427611157	3.00026945740842	1.62206482143302	1.81254438259223
KNTC1	2411.20713824948	-0.452677302319908	1.07135093112783e-05	6.33552485235269e-05	2.19982007410736	2.72850442256509	1.76567437108509	1.84152000739794
KPNA2	5585.59523309707	-0.619395478694477	8.10341555580344e-12	1.19521445751229e-10	14.2624663683826	16.4566492613173	9.31749059113879	10.738023383601
KPNA4	8269.29711500026	-0.412489107679696	2.25095175772329e-09	2.39471002124175e-08	6.48203887349672	6.45896274907043	4.98139390891576	4.77186915307868
KPNA5	446.230462931639	-0.390457206957581	0.00895555621985646	0.0272268981573063	1.47520751605148	1.41131814235684	1.14156021895721	1.0682082424539
KPNB1	15072.5585027095	-0.42021113580592	5.77399695909818e-11	7.64765142132689e-10	24.0658766293077	23.6120785997872	17.8377723095632	17.9119609980118
KRBA1	685.104340480205	0.538322629998291	2.29779273412053e-05	0.000129009232536378	0.879108138766935	0.810276853463363	1.23814415363822	1.22744723597733
KRCC1	879.688771918868	-0.521067246782162	4.71761714295806e-06	2.95181382355102e-05	3.53589511266918	3.44757346190044	2.47781180198991	2.40538027251976
KREMEN1	284.12222706573	-0.511760640969354	0.00461544285973696	0.0151737303451902	0.279623430392201	0.269632998168923	0.185891792455245	0.20117947580388
KRT18	864.506620867671	-0.848615234056731	8.22525795146833e-12	1.21200891172364e-10	4.75025231673675	4.15746173282351	2.59640576669835	2.37099687297242
KRT34	98.0185087516237	-1.19047207876485	0.000104722890330368	0.000514038820645865	0.141284472900074	0.185707534035395	0.0702444457875862	0.0729199982152435
KRT8	966.14484695875	-0.375933953823283	0.00141537830061759	0.00531317695650664	3.14803109851613	2.7772264946547	2.37556104178362	2.21096419874518
KRT80	368.750756531382	-2.31126733654785	7.84458952024822e-41	9.02840939330385e-39	0.930687951308723	1.01016587894719	0.199186575665551	0.19246834659894
KRTAP1-5	44.2877712769786	-1.91053667568532	2.74592728030956e-05	0.000152082126294068	0.179262581326843	0.186844238936938	0.0538797755371107	0.0434157570280532
KRTAP2-3	86.7078293268504	-3.59905407133749	3.7230547669218e-20	1.22119580936551e-18	0.524421022920533	0.633117127286314	0.0458046195790389	0.0499807766256051
KSR1	899.665792381118	0.361248097271608	0.00214151776737704	0.00769487651891956	1.12201888270669	1.03479726554253	1.44466607443174	1.33759286700056
KYNU	388.565334356819	0.748845787825687	0.000390684984694248	0.00168711946773025	0.702526275987885	1.07545276777108	1.23044763081686	1.75352616273285
L1CAM	85.3896405548368	-3.3789200484999	5.14682225747244e-18	1.41138129486501e-16	0.153898195394777	0.212137810548011	0.0158201571438096	0.0194965074483093
L3MBTL3	1032.58195681304	1.21107167484388	1.92617495638512e-28	1.19928073513946e-26	0.898089146013772	0.921421994217122	2.11330452311177	2.11082752646641
LAMA1	8152.25930743872	0.50233448818524	5.31158279531165e-10	6.19766250586594e-09	4.53422985707496	4.06040993670039	6.34210421184423	5.87771862876808
LAMA2	606.399276693025	0.502834561048399	0.00128028348680008	0.00486745743598017	0.365603120962673	0.269716458651229	0.474128853696649	0.432924699755489
LAMA3	145.377747174852	-0.651469791861299	0.0108935082615781	0.0322852472707558	0.110044921179294	0.0843033606227673	0.0595537606458712	0.0652680710196281
LAMA4	6949.72350123896	0.820657191118755	0.000198488532099403	0.000919060585082028	4.68683530164641	3.47872217146286	7.33114830914846	7.14998160497798
LAMB3	3527.61580665203	-1.91931433066346	6.63856533826787e-78	4.80252783899836e-75	6.8158593956717	8.47040183366526	1.91871933921611	2.13344418319588
LAMC2	111.180132549778	-0.775867110911878	0.00558633333854959	0.0179766100570314	0.127872817983135	0.137822556652853	0.0727640508321177	0.0829451855056943
LAMP1	14314.0125497169	0.464459225970427	1.37522821650569e-12	2.19034077915191e-11	29.4328546247887	28.8494333574519	40.8980702063563	39.7849500656119
LAMTOR1	2810.56888408388	0.395713453343364	1.07483575382514e-06	7.54919314475799e-06	12.5376211815616	12.8035144054649	16.35580400116	17.0912381521199
LAP3	2988.72792933561	0.495142394893098	6.56774719983607e-06	4.01517969657584e-05	6.7080108146113	7.84029986971951	9.10363542374857	11.4583738857839
LAPTM4B	1758.77658556589	-0.350571418441691	0.000236199168330502	0.00107242611036371	5.67603352756938	5.15795261768808	4.25479479671458	4.27992670733519
LARGE1	2198.06997376766	0.542776972841441	5.93919337352997e-10	6.86146203275037e-09	2.67517970118802	2.56408437037858	3.73673454136384	3.92757294665255
LARP4	2628.49518388777	0.348349518361293	3.36332719705715e-05	0.000183138590601047	2.03503213755392	2.19834865728746	2.67223687607295	2.73044975275804
LASP1	23107.7641465117	-0.330242512832089	1.24101194293394e-06	8.58536131013315e-06	38.0938948992292	35.9293759177757	30.1880167719652	28.8879965008794
LAT	177.770946958701	0.965923461205834	2.44061948036022e-05	0.000136466290561769	0.373347974854266	0.431802510527432	0.793201948807747	0.77858401346406
LAYN	2261.08480166942	-0.535580685973944	1.12657407894296e-09	1.24835254611972e-08	6.03223304680931	5.61270711088385	4.04301514724011	4.02287438910912
LCA5	545.316421477683	0.510872840508992	0.000371396786558421	0.00161253500468578	0.625956519411682	0.545157532263554	0.868336780576567	0.809741538292447
LCOR	3154.69888718858	-0.382232961214405	1.88875065565646e-06	1.25905660205059e-05	2.02727294521817	2.14879986320006	1.57229449008824	1.64119317326514
LDAH	984.391417906952	-0.403061712431597	0.000210842436587023	0.000969466796800863	1.70066887952974	1.7656374556196	1.30256671194002	1.32639263726248
LDB2	2107.61067341538	0.533880200107186	2.21826810502054e-08	2.06494663305588e-07	3.36115992959117	3.00319814157971	4.77408869964107	4.48149846888491
LDHA	43358.7344322314	-0.863042918490738	2.1833263368682e-41	2.57124757439548e-39	130.425576230979	139.355174533946	73.3926181552249	75.3884114311872
LDLR	6988.88229972615	-0.461009055449591	1.1152605869915e-07	9.253434646409e-07	10.1853455414165	8.66470831300059	7.00657217176833	6.7418022292915
LDOC1L	3543.61442471451	0.388738024352734	4.96985306209147e-07	3.69022520622159e-06	3.46765685469539	3.62873479980005	4.59873132486033	4.71907152407197
LEF1	1207.91271024541	0.753154503022897	1.3563305871229e-12	2.16670602308845e-11	1.26428067262629	1.42131397309442	2.25592744662913	2.27635316177974
LEPROT	5833.09751706642	-0.548237181961456	4.68026869886186e-15	9.58256631713064e-14	8.24753867154194	8.40403857310026	5.70408389126808	5.71883930615921
LEPROTL1	1185.17680087432	-0.639355617649853	3.85413051430796e-10	4.57437115416926e-09	2.78238653199883	2.86380460315545	1.80277638346043	1.83306682054764
LGALS3BP	12666.865016993	0.362020794969802	2.74344587700271e-06	1.78954185330293e-05	28.2988567417072	32.096892047566	37.4649461444933	40.3753028967483
LGALS8	2502.14677266664	-0.599723402180546	5.85800034146167e-13	9.7155830990705e-12	2.71392465752131	2.85042458885533	1.84815459468045	1.83358562937578
LGALS9	81.3372262803702	1.88337691278137	8.50361053245759e-08	7.18902900440154e-07	0.119610010329759	0.122316506224023	0.403750583806392	0.492463652139635
LGMN	417.524733761744	0.908207494244498	1.65065793424438e-08	1.56827988349222e-07	0.878776929442623	0.759283767972697	1.47579325344382	1.62111442552611
LGR4	731.851776363939	-0.421633114847047	0.000618538123708598	0.002543120751118	0.943797926327158	1.02330127901311	0.749346815331641	0.721765470145616
LHFPL2	3227.35959541196	0.43727038692822	1.30468056162735e-06	8.97449258315568e-06	3.15141172485269	3.54154822334502	4.28255942563082	4.80335374566624
LIMD1	10825.2175069145	-0.935032716804764	3.74195581376125e-43	4.94328632370964e-41	14.0871387208058	13.7501768373108	7.11390059708407	7.49753644689707
LIMD2	591.88242610276	1.05271039125848	1.54598584388548e-14	3.00808093472734e-13	0.760071709964153	0.707641468923952	1.5731223766122	1.48591531585129
LIMK2	1291.99638372698	0.381464814018218	0.000142342445363682	0.000680448845174654	1.41031783931681	1.37391336838928	1.84247904581952	1.79757440466423
LIMS2	3701.27929124888	-0.40262236175386	1.78663429927638e-07	1.43535421864657e-06	8.25411535590296	8.53504300920863	6.48846895114531	6.24743532811447
LIN7A	952.78198759425	0.674471480100052	2.56439797328724e-07	2.00609340938103e-06	0.769428125406176	0.691782586126177	1.2925866428811	1.0486222583922
LIN7C	2958.74482671612	-0.529549034363907	3.33519874546712e-10	4.00540231945742e-09	4.23472858234343	4.63680706869924	3.14388011904765	3.01560849360497
LIN9	203.95750988727	-0.821513271927344	0.000142980129487648	0.000682964398855075	0.418720245809388	0.507302581842619	0.27147954242715	0.252129094175025
LINC-PINT	3623.94719668056	-0.348650683545111	2.62334177755821e-05	0.000145931191082623	3.78917493844816	4.26500199008298	3.16803478205426	3.17141756902312
LINC00174	198.515746782816	0.686933891344164	0.00134737485696915	0.00508680885364696	0.214616695749915	0.208217947425655	0.329696971872768	0.354221807868122
LINC00294	1277.19832490344	-0.59349830307323	3.85144479691051e-09	3.95078658708065e-08	2.91224243394009	2.80724708929034	1.92470872879232	1.87943447799927
LINC00341	1201.43605937513	0.719890319767316	1.89959251734735e-08	1.78249595574682e-07	2.2076732796752	1.73905595169057	3.48984991222082	3.04893706648583
LINC00452	227.352491518632	-2.20818861963128	2.09697434252691e-25	1.02765271650545e-23	1.38632726127582	1.47693185237768	0.303558928759654	0.31798597400136
LINC00460	15.9585565709338	-1.92032742915793	0.0125519950790058	0.0365726715075289	0.203686502337844	0.136193181059066	0.0587090939133961	0.0310602638110981
LINC00472	1151.1473874307	0.679097142711957	4.24164570785726e-09	4.31608048183305e-08	0.521624841826028	0.619474648450407	0.951158186339535	0.876158572672353
LINC00475	370.073900348285	0.501511177787914	0.00205398812474785	0.00740840161233841	0.974286857082531	0.908708142662299	1.29759906805459	1.38254825070684
LINC00476	234.824539133362	-0.710609117254358	0.00102030802905997	0.00396027582459865	0.205027977067013	0.185501518082631	0.100000010163724	0.140536940682565
LINC00623	42.3028482806335	-1.2004071744462	0.00894663098326837	0.0272096788213222	0.110875154006751	0.0853683732998281	0.0488611541557127	0.0368888980487411
LINC00641	1550.3414695303	-0.431114077808688	5.67677451910269e-06	3.50860693629813e-05	1.89046973065704	1.94435088791383	1.45876292259869	1.39287810095985
LINC00654	207.862780542879	0.962150546114994	2.32062838445969e-05	0.000130140223022191	0.126230388391086	0.159276316667699	0.24486987327121	0.311087699973648
LINC00672	217.836821116026	-0.920067506582007	9.29390884435501e-06	5.53698286915456e-05	0.495846800517812	0.454046129154446	0.266899994854784	0.236831987702867
LINC00674	2605.07734728786	-0.333057627355998	6.17453841030161e-05	0.000319385725329595	1.63332808720028	1.55920446366619	1.2678156423526	1.27627853312486
LINC00707	21.7948828565931	-2.91466858629499	3.96190068260743e-05	0.000212833080516875	0.0626629029016338	0.0919074765383611	0.0111229133212292	0.00924725769490022
LINC00839	406.16848639957	-0.576102119370998	0.000435195401150753	0.00185715970064108	1.4101300763758	1.18038815079675	0.83136576330047	0.918397854207042
LINC00842	167.007592169569	-0.693565698815909	0.00412320731323978	0.0137398037952926	0.471041585002554	0.413201512320845	0.30913333610742	0.23921161670784
LINC00869	110.622294764088	-0.970061483764951	0.000564644770280741	0.00234887276837487	0.127462351073164	0.143081112055156	0.0709422222730527	0.0672484980133179
LINC00893	139.289374275926	0.741988473888112	0.0033180574347397	0.0113483738995967	0.277155729893136	0.268269477643186	0.468937213376388	0.446786899856961
LINC00894	272.879100421093	0.765153057668773	5.27982148017099e-05	0.000275923797477666	0.405648945447855	0.375554194809763	0.70367382815586	0.629877161316173
LINC00900	202.682328083114	-0.745869603647297	0.00038913497966982	0.00168138185754946	0.694435060890684	0.699266674252619	0.43062060323816	0.402484520607369
LINC00950	23.8678142926846	2.27743448825718	0.000611510398024423	0.00251968157493546	0.00828208606264713	0.0110754874155183	0.0539437817234935	0.0389707119329027
LINC01004	1458.70715616078	0.470196522560452	2.6695547998955e-05	0.000148230542836303	0.7161630973907	0.884584278288127	1.07466274224683	1.14472587436521
LINC01021	806.158900979177	0.596938107340376	1.05046568463433e-05	6.22413209085987e-05	3.94445848659322	3.18142016967487	5.71621773307167	5.12851574000368
LINC01060	152.572706018304	0.775299631337321	0.00408245215757631	0.0136219225077749	1.02299179743852	0.643778288422716	1.32450303597279	1.5691419384539
LINC01061	195.098399799927	0.79478632639703	0.000992697547071292	0.00387488723923614	0.150697572900265	0.215304703694455	0.277423122444154	0.355894665805305
LINC01111	441.559715052507	-1.46625082708112	9.4307629270511e-22	3.48594039872896e-20	2.37018677900407	2.50125687773297	0.91373089655062	0.852192063007022
LINC01118	24.3656998014625	-1.70344255932343	0.0133653153786256	0.038572543927067	0.249891896827905	0.190957725772558	0.112249863512966	0.021774942376486
LINC01128	494.100218247059	0.408330815972474	0.00442302617050888	0.0146361606583252	0.270862824087968	0.295708196711415	0.371953553293406	0.381267850026494
LINC01138	138.277551355372	-0.731114033491541	0.0036210430907042	0.0122819572748333	0.502016421064117	0.533834792346139	0.323310969777193	0.301599399848388
LINC01224	260.067662981545	-1.70315819631719	6.45641796790775e-17	1.59489271168219e-15	0.855366659993318	1.05961592004611	0.312387147820185	0.274911835946475
LINC01279	2049.49480885364	-1.54511150633258	7.62820083028837e-51	1.36338384722048e-48	3.92169187223363	3.3332702190562	1.27986567153355	1.21651819805982
LINC01410	130.376044487827	0.864846238695907	0.00159383393676707	0.00590429777307128	0.163930937300382	0.233644443668796	0.347594493207983	0.372995226438092
LINC01605	290.729240693711	-0.431818346871329	0.0175126116557481	0.0484170329889216	0.963486120658931	0.922501832249047	0.652068841379781	0.753738580123686
LIPA	3047.76138396722	0.370566877347134	6.48788057973371e-06	3.97114753292967e-05	5.70350891361903	6.01381235459324	7.33912020110076	7.85502394991765
LITAF	1855.73047954887	-0.618333517362474	1.17448259925994e-11	1.6864593240035e-10	4.78679059352624	4.66553961079374	3.16765713322574	3.00966950254997
LIX1L	3041.40742367746	-0.797392802590068	1.61917445062685e-19	5.08233434998413e-18	5.88852643922978	6.01822382895324	3.64886805303371	3.21866185281196
LMAN1	10573.364594881	-0.600639498143033	1.4879762020881e-19	4.68990341537808e-18	15.879990753014	16.5682244769901	10.7796538654449	10.6826103771953
LMAN2L	709.410014525498	-0.371385997150109	0.00322936894579341	0.0110771219292151	1.98104337976868	1.87557872935287	1.55727632899006	1.43446590870009
LMBRD2	731.560368122893	-0.543799108418853	7.03647969150225e-06	4.27763903454591e-05	1.64103656106572	1.65871541890077	1.14080671386219	1.12959952075584
LMF1	519.64596498917	0.6098138924401	1.29857220714679e-05	7.57600190897622e-05	0.535175787460776	0.54874806125669	0.837215915280216	0.821357536459676
LMF2	4243.01287861879	0.357858453270553	2.73313559551059e-05	0.000151428869318005	8.20893438840941	9.41626762914124	10.9369852626286	11.7029863468836
LMLN	558.261455097456	-0.363254894940273	0.0115529000593568	0.0340007085822838	0.48836738303053	0.593924616101471	0.418676248097978	0.423018737454352
LMNB1	1045.37444522962	-0.837298642891098	1.54253451096304e-12	2.43852073783043e-11	2.16600495749496	2.57710415502275	1.27805546982847	1.38153126753646
LMTK2	1246.88811227072	-0.665982355973411	2.93112239255357e-10	3.5425307388762e-09	1.03855295813592	1.06691002505075	0.700779955387414	0.629034754460225
LNPK	3654.68785489758	-0.539141402327945	8.62134953149172e-12	1.26914284963587e-10	3.10432732791667	3.35043361592755	2.19158298195349	2.26273833802189
LNX2	601.515758584644	-0.440586708506424	0.00107811108294425	0.00416124582624215	0.833189728859486	0.943191643747439	0.666131128698995	0.644131940558797
LOC100126784	389.031394184112	-0.579081153453102	0.00145932451049274	0.00545926076419743	0.693758006518481	0.841189891734809	0.43837189275644	0.59223009564611
LOC100129034	4499.06949028241	-0.770566870476199	1.95432615439476e-21	7.06907688989648e-20	6.1860931553506	6.03661015304134	3.77649946750898	3.40947297804863
LOC100129550	409.156839146642	-0.861699339379071	1.5785558021341e-07	1.27975145599617e-06	0.57179419572275	0.528508281114304	0.332979568093252	0.27408157588594
LOC100130872	3098.96316806714	0.46452783196067	5.06465597409412e-08	4.42960584677247e-07	3.37753740590133	3.05224385515613	4.47469567962878	4.43647073808687
LOC100288152	789.149157049092	0.456849998958332	0.000134014336283152	0.000644490597281938	2.27180404202109	2.32512832403163	3.05674466897647	3.27406920984548
LOC100288637	436.71197295115	-0.923803602034605	1.81098766032234e-08	1.70673229129138e-07	0.13441838493631	0.172175287987385	0.0789303387622271	0.0827310006204178
LOC100419583	1185.24681821056	0.49949718320346	0.000266096344360035	0.00119703334911403	1.32330777107942	1.62216643448317	1.80260356219194	2.37036388152553
LOC100506178	108.965304414697	-0.736935158968714	0.0104291894703725	0.0310972024404121	0.356939534910306	0.330720762704318	0.182381047925331	0.233271003478584
LOC100506548	1050.33958311123	-0.604146764229732	7.79639665709615e-08	6.62432091804277e-07	2.12719403755954	1.88859692597752	1.31887200836105	1.33604283843365
LOC100506746	133.969632134277	-0.795940417981886	0.00192810020664345	0.00699753902038397	0.50091869258742	0.576002625908419	0.308492346619856	0.312352871999771
LOC100506801	14.5616516985714	2.41897526525714	0.00481023646473369	0.0157290383926462	0.0120544847925919	0.00967214976596629	0.0473794870354278	0.0705866818917636
LOC100506990	1711.56580173478	0.32931080165403	0.000448627024905827	0.00190858072315019	2.30341978686606	2.18597099509814	2.88560839343932	2.77676218059936
LOC100507053	285.891218910206	1.82415527564235	1.76214370830018e-21	6.3891377605003e-20	0.159481958058459	0.161674243093205	0.555052310851199	0.58602123935441
LOC101926941	98.8542110600121	1.17979113893439	0.000123444807672664	0.000598969504363818	0.693016614045578	0.561672047323118	1.35367764055413	1.51792718019909
LOC101927027	739.726283392962	0.472111647421721	0.000433605166387696	0.00185089342168077	1.1171395414077	1.40363844645207	1.73543328453541	1.75969246659697
LOC101927204	334.236803186805	-0.78489137434144	2.80666209354913e-06	1.82685563518416e-05	1.15768781618158	1.16019288190049	0.681991221434835	0.667383563362665
LOC101927229	837.227185738394	-0.937874395144802	4.67773646632983e-10	5.50458345441384e-09	1.86553901762982	2.55428009365632	1.04816710734447	1.26255972129901
LOC101927476	63.4370535544287	-2.31347477893871	4.37375460407959e-09	4.4475287781243e-08	0.233668214311421	0.199102540467289	0.042263576012782	0.0454073939993501
LOC101927973	43.432439562763	1.35081224742411	0.00309581575156347	0.0106817244827963	0.030433409043018	0.0369982367329428	0.0891689127917402	0.0822688485518207
LOC101928161	136.827792541178	0.6381086134281	0.014602499422281	0.0415978194680841	1.37903306027251	1.0939911769189	2.03028329326186	1.84983466453426
LOC101928174	7.73213319845508	-3.05350893021623	0.0114936129178104	0.0338524558835549	0.0409613780278965	0.0213021384284538	0.00536654783846825	0.00208207415646085
LOC101928211	24.1754888014335	3.05024391695445	2.06350541765123e-05	0.000116929408075187	0.0550146167661907	0.0588560602780076	0.441113105041755	0.503352502186945
LOC101928433	106.51030586738	0.761521980647557	0.00910528413987496	0.0276213012485983	0.0972507431323056	0.108962236118243	0.159093935983866	0.191184409089862
LOC101929147	546.296189745365	0.557166139499706	4.64277942642152e-05	0.000245588805871155	0.531081313364034	0.53184350835039	0.772999941377678	0.796536156567439
LOC101929709	331.023511539646	0.536384451903138	0.00174499572967859	0.00639719476961321	1.07368189233585	1.00040597648059	1.4503556433103	1.57460987117609
LOC101929723	11.8951843246642	2.48675135912349	0.0117083646634538	0.0343982742152756	0.0138210440339116	0.0369652761656974	0.0869165609829424	0.18968205650341
LOC101930085	389.815365007271	-1.24221078972117	4.49641383095377e-15	9.23101607024996e-14	0.790641250624508	0.812708878932736	0.340905263522531	0.338752524932696
LOC101930370	71.5607789836105	-0.909555745643825	0.00966707621733543	0.0290701151808709	0.182022355853932	0.165622768958917	0.104732879028395	0.0806946968731269
LOC102467080	183.780658024013	0.803812976202821	0.00049520429481621	0.00208512850522391	0.868410502204295	0.813764690421973	1.62440305124071	1.32231062229262
LOC102724360	81.4587414505411	1.04631311081441	0.00154838408102977	0.00575135720269052	0.313599354814158	0.322592983447972	0.687403146597967	0.629029202732979
LOC102724571	101.496757217679	1.2175974108042	7.30537250071061e-05	0.000371678563398511	0.35424702465716	0.414512253272941	0.984589208015488	0.798714208974807
LOC103091866	101.507523457305	-0.738268982400325	0.0108241108130062	0.0321108946438567	0.520234028725559	0.519014120375724	0.311581124801127	0.313545406951101
LOC103344931	361.991193908496	-0.687659740549097	4.82470119233109e-05	0.000253973875654518	0.694235902185809	0.601298626682586	0.382242090884035	0.427477785147351
LOC103611081	591.702010885803	-0.573221894982248	2.5738227836594e-05	0.000143386562997263	1.14522850541761	1.03137187699473	0.753869128990648	0.715583740243321
LOC105370526	392.270615839766	-2.43128597607083	2.08150957474492e-45	2.98323523203064e-43	7.16036396679959	8.12743667651392	1.38200185696119	1.45940116844206
LOC105376554	10.7252051361119	2.59010207165892	0.0140752701519576	0.0403227426265398	0.00187595186554604	0.0100347091888743	0.0235946407988761	0.0446261251032005
LOC105376575	613.167293795339	-0.396473427176505	0.00284653230245969	0.00991619324443192	1.24494274888196	1.39204075470436	0.983131779499224	1.02392569090032
LOC105378663	63.1759527202252	1.28701810587022	0.000698456290632143	0.00283487789668275	0.440400880538642	0.535400290270908	1.1434901642651	1.23324610471299
LOC105747689	487.801094932026	-0.691750834422905	2.59179415592857e-05	0.000144281923110541	1.75056336177224	2.17002574067805	1.07717076059169	1.35571734471752
LOC155060	320.200179961614	0.767070500564248	1.56970250509246e-05	9.05693902672413e-05	0.476146798553192	0.447298593805911	0.734667467645729	0.846091828026096
LOC283299	52.5251376039749	-1.5622180955238	0.000174352421701373	0.000818276796566963	0.106609227791742	0.08620308309196	0.0360553542651224	0.0294892572595659
LOC284023	80.8590904883787	-0.863828803631655	0.00766881381460453	0.0237910188832902	0.255598998894074	0.253069404530031	0.141032877194946	0.139415685516618
LOC284581	851.360537243238	-0.431447928732783	0.000185120897588757	0.000864011267640058	1.91582426945732	2.01706505958971	1.48529073184457	1.43753922708862
LOC401052	72.1413891998434	0.827825896030896	0.0178837686898234	0.0492906774194117	0.183192583652437	0.153112629136514	0.311155102902101	0.290325869158075
LOC642852	1768.21192229029	1.12874385534781	7.26178766465243e-31	5.32952068605796e-29	0.917206147763945	0.990285044914893	1.98872278976618	2.19267515612818
LOC644285	35.8844077372454	-1.22073470858778	0.0134259731000198	0.0387181821062075	0.0535585336987311	0.0652564028513928	0.0290034429497884	0.0217791186216676
LOC644794	124.33161902654	0.774056106347734	0.00363855982251781	0.0123276094611264	0.259281009266113	0.259096375548915	0.441232241082656	0.448385854289726
LOC728392	2073.3985032842	0.675684210977325	1.82398641725761e-14	3.50759514569338e-13	6.66286334914654	6.49222160419593	10.3151052224878	10.7813857983495
LOC729683	59.5657221141184	0.940694321677007	0.0148660724676951	0.0421431933064422	0.097789184214384	0.116634262552628	0.18906110334338	0.222469800966577
LOC729987	94.7142141133487	-0.908427332657253	0.0031527537091156	0.0108437025920046	0.298638285237823	0.373716494003667	0.167990717370012	0.190513921887339
LOC730101	282.691167411346	-1.15064512900505	6.64698177433822e-10	7.60398698160739e-09	0.587109476770354	0.682055258787239	0.29135078981181	0.280589755288862
LOC730102	510.937703265191	-0.429087059152651	0.00218227213290905	0.00782465854216528	1.22902727849775	1.1970895192187	0.918556661632105	0.889664546299809
LOC90768	182.307500184096	-0.586811262414642	0.00845368601979636	0.0258667468303618	0.236561813887095	0.272499449492478	0.173990995507961	0.165009190148893
LONRF1	405.264410110345	-0.465802327577415	0.00776122491875738	0.0240384360786467	0.92253227149119	0.706970030679301	0.634371369580334	0.552566035969172
LOX	35116.9522077952	-0.486070243772648	7.70546189766972e-13	1.26416174027428e-11	44.2471718614099	46.7963047933175	31.2679778688273	33.9439121590304
LOXL1	4469.76411851711	-0.435496973989505	3.47114684416248e-09	3.58732400384466e-08	13.2677034238321	13.5915512753337	9.77502674225312	10.1501512976031
LOXL1-AS1	610.964646634986	-0.642786340982871	1.04327691186322e-06	7.34791972416596e-06	1.61032657987518	1.61363698595538	1.07203586171933	0.998209603493097
LOXL3	5293.71889592132	0.854041969458514	4.12180883667906e-30	2.82065404715443e-28	6.24137875630011	5.89879126402112	10.8083677954539	11.2233828696475
LOXL4	2059.3603887369	-0.835148260663947	5.54478327186287e-17	1.37866362465042e-15	4.77683929204322	4.09829377236903	2.44509868985843	2.55400811856168
LPAR1	18622.4647213373	-0.358482631166893	1.11245051863289e-08	1.07989445872658e-07	40.6755987167028	40.6107373267308	31.8314345698818	31.7764146664699
LPAR2	181.641359831063	0.709280486974966	0.00168260660943604	0.00618638906354122	0.508206333911013	0.434583968203183	0.774531875082328	0.778129688728974
LPAR3	504.720217408089	0.722474906982708	9.43482055621813e-07	6.68534486427546e-06	1.25483194211898	1.4755395565107	2.29311871934958	2.2104223535898
LPAR6	242.048963429695	1.77004020733914	9.00457457777083e-17	2.19226757989574e-15	0.172279433787659	0.220786817214088	0.695473871800939	0.638713276864123
LPCAT1	2728.12561440733	0.929562441756992	2.59347551769277e-24	1.19890747732853e-22	1.4431553096513	1.57379892289493	2.70918761873534	3.05255751637988
LPCAT2	1205.50802691257	-0.703820519962036	5.91448323595172e-12	8.83508646220044e-11	1.72532699689997	1.68654072505995	1.06382249119747	1.03798236475477
LPGAT1	5087.13398259252	-0.584679055518757	1.87516842167174e-15	4.05228430469943e-14	4.35068760544848	4.41513155015142	3.00170161355433	2.86043757532605
LPIN1	3477.917981154	-0.331996623607919	3.8855177376619e-05	0.000209099488028904	3.82654460680477	3.55401878181146	2.92193205116836	2.96501345643589
LPP	58074.0414107571	-0.64241395521533	2.42281645660402e-19	7.45089627707051e-18	24.0641380933887	23.0705152454875	15.8940431498556	14.3977475861061
LPP-AS2	131.850006526826	-0.712239195295629	0.00593060250020422	0.0189479943602739	0.333637030711092	0.365569015400029	0.199662384408526	0.228451849483723
[truncated: 2,191 more rows]
