# Supplementary material for: Integrated analysis of H2A.Z isoforms function reveals a complex interplay in gene regulation
Source: eLife. 2020 Feb 28;9:e53375. doi: 10.7554/eLife.53375 (PMC7048395; doi:10.7554/eLife.53375)
Supplement: Supplementary file 12. [file elife-53375-supp12.xlsx]

## Sheet: 20191104_sirt1_regulatedGenes
Table S12- Genes regulated upon the depletion of SIRT1 in U2OS cells
Gene name	baseMean	log2FoldChange	pvalue	padj	siCtrl.n2 (RPKM)	siCtrl.n3 (RPKM)	siSIRT1.n2 (RPKM)	siSIRT1.n3 (RPKM)
AADAT	230.209620859582	-1.01195534956407	9.66701491831278e-07	1.7654889484929e-05	0.738710419839658	0.640342068763325	0.362464311493967	0.3554655334692
AARS	9266.15582493356	0.442185134728138	8.18444640772303e-07	1.52408886349334e-05	14.2763325350012	12.8922756798263	19.3276498770859	19.3491956217736
AASS	2920.67143747633	0.362288729951072	0.00158213884936516	0.010331042598322	2.59599274095245	2.43830101534975	3.66954301873475	3.10884261741655
ABAT	92.9851875957486	1.26067365196785	0.000260216279498553	0.00232619090901638	0.0523241886275406	0.0545783263859636	0.159271915501117	0.108545101205422
ABCA7	175.69225865643	1.03029643430678	9.93459853970654e-06	0.000136476669067506	0.0973899117807591	0.0985912385501797	0.220934061966157	0.198113359346292
ABCB1	447.946419616155	0.641659803677078	2.77876609168089e-05	0.000341063319965164	0.428974024474084	0.429364694190962	0.719951940697308	0.682434743583709
ABCC10	2108.72564262195	0.415684984301315	1.14177406641953e-05	0.000154729691358457	1.88872509270669	1.93798443282907	2.60258334214991	2.74158370887008
ABCC4	13508.0440557659	-0.496015473289101	2.02963245452023e-05	0.000260454023852706	15.5106550851768	13.6660389973243	11.8107176826453	9.85691057664783
ABCD1	869.653334085443	0.504436250868134	2.45973337338256e-05	0.000306941461699856	1.13137919737423	1.13925992442607	1.64710718818769	1.72613795124172
ABCD3	2016.73059734982	-0.378995252473573	0.000175486884036155	0.00165776168148444	3.49752129850522	3.44886902811065	2.91477403704127	2.67895054909588
ABHD12	4157.73728439177	0.538602433007724	9.08006601593059e-08	2.11205648324117e-06	7.91728561604817	8.35721879886162	11.5010519676404	13.2475351245881
ABHD13	1083.78282647552	-0.443332661319108	0.000319517420266477	0.00276809841671254	1.31791031995489	1.40868239330048	1.11541177721354	0.982251089866357
ABHD14B	440.726443537363	-0.898198046651004	1.34442098927867e-08	3.61935677459168e-07	1.43363982691851	1.28720160061438	0.777106449582516	0.754356802656812
ABHD16A	1111.68617394689	0.339250692419476	0.0019886602470118	0.0125024422342391	0.321949072544188	0.33210108982227	0.42753988466982	0.438578376235763
ABHD17A	894.538795164874	0.590313944588903	1.80127304362111e-05	0.000233068779610975	2.15534188091543	2.6695133354067	3.81044563846809	3.77089664718249
ABHD2	9396.82299912775	0.406623369545981	1.02948045595426e-07	2.34788502036008e-06	5.02404106147458	5.21474489443814	6.98868282316265	7.22022248933561
ABI2	3662.99592063857	-0.387362574189557	8.5680183661679e-06	0.000120175025603871	3.50551517854895	3.42754346357854	2.83324110674353	2.71797591552382
ABI3	257.154235048693	-0.546628686830077	0.00466195507993549	0.0249574740271661	0.832716264702251	0.842068640506687	0.560366974205484	0.640463197734955
ABL2	11919.8029528287	0.856452919062893	3.41802232083235e-19	4.07013275692403e-17	3.70160644943494	4.05979788450027	6.8832913442332	7.82660869281068
ABLIM3	5439.28715327584	-0.604119059505149	3.75424720567873e-09	1.15729827048022e-07	7.56434295586955	8.21078718938205	5.02057830262046	5.8436667751015
ABR	5652.3119672796	-0.368600812007634	1.0415891013592e-05	0.000142669225934221	1.58311829117965	1.66383469346169	1.27530134516757	1.35739326568284
ABRACL	282.604575650171	-0.916983933273307	4.65007479050086e-07	9.21213969089901e-06	2.56304310196211	2.49452182579475	1.38140053163472	1.42538188261246
ACO1	9489.60395440437	-0.500605215617125	0.000549099441413923	0.00433460382810003	18.394091523552	17.1338445930978	15.2998398041773	10.9878540428982
ACO2	2983.93757202804	0.35812469208081	0.000190969670490131	0.00178094454673842	5.75737498184185	5.27411281926479	7.31030960543833	7.51104187955487
ACOT13	642.269556995534	0.437846454145257	0.00145741343047809	0.00965596635611037	0.740213966793214	0.695179434487881	0.976858823891808	1.0622866523046
ACP5	40.0807682695521	-1.42685004905332	0.00504687156263115	0.0266318361690988	0.139001590196707	0.19827666299729	0.04580711597685	0.0849530738765909
ACPP	242.97450581799	-0.835646262739234	0.000184456525350058	0.00172824797899794	0.398214758761248	0.547740579831893	0.265136578306026	0.287367456552166
ACTA2	22292.7127549691	-0.435618908190031	0.000324416128591308	0.00280016038130565	85.2859210835651	74.2416933184537	67.9523729864204	55.5788705547977
ACTA2-AS1	286.28290607107	-0.564099782108125	0.00269196718397879	0.0160738747222165	0.975043199003253	0.958636447288782	0.734941230883953	0.634898440125962
ACTG2	29609.1740096681	-0.520169768829479	2.1569994754904e-12	1.14598767587986e-10	152.921918893653	150.324391792404	112.364828321031	109.048280392162
ACTN1	46747.0020108428	-0.362508613593543	9.25052714719697e-07	1.6960508989096e-05	80.187262122736	80.3032645340593	66.7549513303383	63.9437999923364
ACTR1B	3536.76654488941	0.406854009458971	2.77431259524879e-06	4.49901525467421e-05	7.53032667544734	8.0598135370875	10.7509393021171	10.8777482466256
ACVRL1	825.541817963151	-0.436724249468415	0.000273740738428168	0.00242851840429695	1.25409341652848	1.23990634888124	0.953522778691921	0.976589981956265
ACYP2	264.508017664465	0.517735355246899	0.00600962219578145	0.030707089587625	0.348611968804918	0.373429809794857	0.530300062920182	0.550663438682554
ADAM10	14115.6686437825	-0.949221800007698	3.69780797329963e-20	5.08484849348046e-18	22.2621794119142	20.4681595276233	12.4252992212074	10.7503474129619
ADAM12	1644.25718580609	1.08113756655494	7.2566671389248e-22	1.14361812686022e-19	0.646465145575887	0.721505359279141	1.43836281088875	1.5877869242366
ADAM33	3578.27045275833	-0.429805232333455	0.0016746443390677	0.0108424238983016	6.12593491158623	5.38430245864177	5.03014944191203	3.92019109626578
ADAM8	251.012908966538	0.535717522178074	0.0058656517110863	0.0301361285346873	0.342147251246043	0.377099568276238	0.52968901058841	0.559866749759371
ADAM9	39778.9080110641	-0.903163681248286	8.57423766125686e-30	2.67249460970642e-27	52.8770323391553	50.1501264504005	29.4646237184951	28.2272790345352
ADAMTS12	7196.3842264338	-0.580667783714215	1.90340145828826e-13	1.15571899800654e-11	5.13804429671491	5.03710882920996	3.60274193998145	3.52221889844759
ADAMTS15	2552.69074479206	0.895469363104257	2.80218182724493e-12	1.46109302263708e-10	1.98073552465423	1.65184711715606	3.79152951626464	3.29496415462755
ADAMTS2	7853.73679964257	-0.331587029172445	2.29167557002897e-05	0.000290099652935255	7.05609988117994	6.86026238600457	5.81286552037692	5.76912295993456
ADAMTS5	1532.43570985316	1.49594612619577	1.31496500572439e-16	1.14557137703666e-14	0.548445001617228	0.409653528523022	1.63304587743715	1.20355902521281
ADAMTS7	336.782472735503	-0.705379015334146	0.000331836759794344	0.00284843475696173	0.470874109949986	0.402762188660875	0.312257501811958	0.249908497404223
ADAMTSL1	885.412822747344	0.649725534980037	2.00952764814844e-07	4.30315035006566e-06	0.484282745528417	0.513739210493189	0.778982082177761	0.859269106389131
ADAR	24223.129637379	0.446540207698193	4.40348994827112e-05	0.000507088259560351	15.7888785149475	17.6739470891008	21.6011075630411	26.1403579040538
ADCK1	132.396842429838	0.938507145172534	0.000865964893090279	0.00628676169279723	0.208336462776174	0.263745756241331	0.522508258384665	0.419091690500955
ADCY1	42.2486588992635	-1.26114186131804	0.00442773647748923	0.0240059651462172	0.026394763159651	0.0269542640914362	0.0123606444241184	0.0109359590731555
ADCY3	1970.36025371716	-0.54006478351901	1.17581220229482e-08	3.20854901739049e-07	2.85496563291625	2.85333732464009	2.08192700158938	2.02904636123766
ADGRA2	10305.421041029	-0.457207154924413	2.17557439785638e-06	3.62837176032503e-05	11.8703344576556	10.9860874278426	9.1957463683623	8.24058614085928
ADGRA3	1269.84417319941	-0.918291831516091	1.42260014854394e-16	1.23169072120231e-14	2.1224487367321	2.0842159099149	1.21220062606033	1.11897726070968
ADGRE5	1642.68038002287	-0.459533517412908	0.0002379252762288	0.00215577514495165	2.87890922376478	3.42927565645598	2.24421038349221	2.55265984343179
ADGRG1	50.2654221159165	-1.34591727511368	0.00153952497775487	0.0101187335229568	0.0964608617289064	0.0694590651587009	0.0337828801568271	0.0349834658944973
ADGRL2	357.317934832735	-1.01320578215143	5.46203274438608e-06	8.14138908318376e-05	0.499670454926658	0.383916375903399	0.266714251245963	0.192804176533941
ADI1	1965.991521892	-0.500185457288913	2.4389434142334e-07	5.1519006518129e-06	2.19622926992411	2.27441850917331	1.6954686448098	1.61289438119728
ADIPOR1	3291.05035024435	0.329296668061385	0.000167778503000247	0.00159238453012719	6.96118586883744	6.96639081773459	9.35117293212559	8.97175984804859
ADM2	502.786182727347	0.612127404049983	0.000101504004842902	0.00104300012595351	0.615639759050229	0.522785452082481	0.890137238070975	0.938495485575561
ADORA2B	2632.15580190499	1.09936810221407	2.22407727348182e-32	8.43105617239353e-30	4.99085598789342	5.29620239391856	11.7169013471607	11.3435563616255
ADRA1B	345.724567161945	1.24307139942458	1.34562297317667e-11	6.37625264249187e-10	0.534115289094013	0.519129252168176	1.40534554668565	1.20717790319792
ADSS	2366.36053251783	-0.455175598055579	5.90643380626103e-07	1.12865995322367e-05	5.69706217171531	5.68261397231281	4.40128233912859	4.29086921868582
AES	6844.09991918913	-0.580188720645776	6.89939361015651e-11	2.8886834261509e-09	25.3080601457526	23.5122842347354	17.529331198482	16.6768174458214
AFDN	3313.48123142402	0.456352749294636	9.80569122111981e-08	2.25097586035068e-06	1.52596956228657	1.53796258374578	2.16394108514241	2.2382288164736
AFF1	8605.00727867987	0.42745300089514	1.45529174435566e-07	3.21447590650905e-06	4.3041236025899	4.43104042947361	5.92708465272555	6.3730044880889
AGAP1	2429.01781712464	-0.363347418185883	0.000510726340624553	0.00407941210341685	1.44945873912254	1.33091741902348	1.17902383365078	1.08576859337968
AGAP6	416.707072837403	0.460576651020771	0.00396925193954554	0.0221098998030444	0.685039150070437	0.781371527521991	1.04662928348328	1.06075497244998
AGBL5	640.538519111481	-0.559418658199022	3.60406806305507e-05	0.000425869070365715	1.24217948338615	1.24702833325997	0.923091586578789	0.845483073278132
AGK	1136.50194524258	0.372375873437596	0.000637879510784244	0.00489168836427546	1.13195517543084	1.11779133839595	1.52066682960089	1.53000936421462
AGPAT3	4191.36424225939	0.328343471837367	0.000105630539088369	0.0010798643886687	3.16902172838384	3.33881907449998	4.18612056237246	4.36646716825171
AGRN	32972.3278554602	0.651614348987487	1.90725512939232e-10	7.49332225346124e-09	18.4197151179475	21.7400468149156	31.2416872400692	34.7830882182461
AGTPBP1	401.245555816786	0.599693876290623	0.000158265676584754	0.00151731673258903	0.401952134553985	0.411370018136108	0.65732449223055	0.632770322419941
AGTRAP	573.26210427536	0.436002979315271	0.00296138239103537	0.0174302767170214	2.07016564477628	2.34049400328974	2.96285963676135	3.27245877531525
AHCYL2	896.701995065893	0.521406949701668	1.53328892126307e-05	0.000201554924176531	0.759327393779336	0.713820722759076	1.11405524749655	1.10303435752074
AHDC1	1887.60331451661	0.422008936252535	4.36919143503399e-05	0.000503552005487155	1.38304566040071	1.55584393882436	2.04694619911309	2.07001432572405
AHNAK	312604.694812083	-0.359433124003866	0.00024430323574119	0.00219812921932808	111.535463775354	99.3733787137417	90.4285056179922	81.7493221434495
AHNAK2	13425.1793130068	-0.464440584035438	3.47785633479011e-09	1.08160560868661e-07	4.83760762157234	4.99634837676297	3.60333960961723	3.85908927017113
AHR	5078.95762425383	1.10538750651159	8.56841508805856e-33	3.43373114357455e-30	2.79835322371451	3.17627700617656	6.65079897438335	6.7942006176171
AIDA	2924.04811925543	-0.542100017988308	1.24357429994096e-09	4.26463890732808e-08	6.46576578558909	6.88245852179085	4.72748781833947	4.86657329392846
AJUBA	5783.049429932	0.518664669240516	1.35367168692016e-06	2.37223807002429e-05	5.6302115438829	4.94441859061553	8.36291085212417	7.51146319146098
AK3	3173.72747609111	0.851118175959482	1.73694843121957e-17	1.7653941084265e-15	2.85712258441575	2.80812934589947	5.64620875486216	5.05565998765777
AKAP12	4241.90756506743	-0.705344251937494	5.31429309499409e-13	3.08009400621435e-11	3.33753923220999	3.58531221567035	2.08538809039452	2.35910946325969
AKAP5	93.8829827704433	-0.893089954556314	0.00311484996238352	0.0181356934713123	0.11383878584491	0.103621869035783	0.0642116512846282	0.0586329431725409
AKAP7	222.209317322867	-0.581366888131482	0.0040220618679591	0.0222801894786708	0.453634538896347	0.436395324719512	0.30088195744249	0.322644950846067
AKAP8L	1982.4549764868	0.441313976128191	2.79709640576731e-06	4.53026260823237e-05	4.07460257617115	4.20585406746642	5.83899357583189	5.93041864127474
AKR1A1	1525.99335370453	-0.531697712820872	9.24347653704607e-07	1.6960508989096e-05	6.84192415156724	6.36058933451271	4.91707193804052	4.65409500778393
AKR1B1	9603.60970295153	-0.672971380211513	6.26917189747482e-15	4.55603134891097e-13	32.1873788214794	32.7215078542564	20.1889226010106	22.4439883887643
AKT1S1	951.537435107224	-0.690847109817047	7.21535336557417e-08	1.70374657080039e-06	2.07610907396176	2.44549863481381	1.47235957051416	1.45479175534341
ALDH1A3	2508.12888710318	-1.15400928053198	2.27843637743524e-14	1.5588950551174e-12	6.05596996803899	5.03628060680532	2.96222914757075	2.2603782557647
ALDH6A1	1380.93232222654	0.875556497105706	8.01111027677303e-10	2.84465399346882e-08	1.24701916714967	1.07521898607325	2.45522570299411	2.01309865637985
ALG14	193.984046017552	-0.762571858075845	0.000616925434944168	0.00476251613011709	1.35004059191212	1.22887580335489	0.854474825724809	0.739914871230081
ALKBH1	409.225302680088	0.739740249471188	2.83932194511263e-06	4.58805640577762e-05	0.681781141597011	0.690221070532999	1.21977499530423	1.17899091888692
ALKBH5	4760.29542824899	0.35244319779216	0.000136188155799386	0.00134047373560855	6.65394498307138	7.44780325139305	9.16780123249115	9.66880802231126
ALOX12-AS1	81.4743961015238	0.92141858119134	0.00481097898218424	0.0256086494133268	0.514754275954256	0.484409786435584	1.01929258239602	0.966272704802773
ALS2	3872.27105546402	0.325877756530976	0.000116789510256529	0.00117510019430278	2.41277052692566	2.35300756990838	3.14789741733859	3.10900343491977
ALYREF	985.048829154953	-0.441203439759581	0.000291981953385201	0.00255958679886302	5.75309462200288	6.21835469310997	4.37107091289722	4.85408079584669
AMDHD2	763.875949961071	0.592188325431161	0.00117538263753587	0.00803404859103817	1.28699759298911	1.78602553352328	2.14377512415209	2.690449075224
AMMECR1	1585.929361294	1.1266406227349	3.32944104989541e-28	8.98052695496788e-26	0.99067661947967	0.959542098011337	2.23930894272763	2.22310703306424
AMPD3	1969.00223907128	-0.4458844302068	1.67516239890791e-05	0.000217957586336572	2.20525882292563	2.44019160393484	1.71948949934395	1.848326084981
ANAPC15	419.896387026782	-0.910828887230694	5.14546092565831e-09	1.53227675038818e-07	1.27734177345386	1.2570779397268	0.681419634631601	0.730861277055803
ANAPC16	1044.24353602919	-0.891508140855551	3.74811294514992e-14	2.51536039084559e-12	2.24648310799227	2.15082702767138	1.28789052958398	1.1955080233824
ANGPT1	1323.95211485007	0.59749861362506	4.47407654753806e-07	8.91383489428534e-06	1.4207197675846	1.28566282194749	2.23604113413261	2.05825870872205
ANKDD1A	805.014335080562	1.48151217301468	4.11954416065698e-31	1.37573158088988e-28	0.784438715693773	0.795437098990455	2.36021298837331	2.25856586501882
ANKDD1B	82.1131792500014	0.848705422813467	0.00945912236609018	0.0441803697325278	0.126447388755395	0.139829268599357	0.263811312977465	0.236936519837
ANKIB1	5319.33899757094	-0.569862949747383	1.04943459894981e-12	5.81793268176684e-11	6.00461065119152	6.08926483726793	4.18718605370319	4.34385002273917
ANKRD1	603.202675978793	1.76378757447255	2.14961933558928e-26	4.86299367757666e-24	0.902239714965528	0.697864714724948	2.95173771356536	2.77410948971622
ANKRD13B	269.118569398888	0.68817047847405	0.000588798168065977	0.00457787311823359	0.406799541259084	0.342619063786662	0.665542359959964	0.603967359320174
ANKRD18B	289.542121495777	-0.712718512475358	0.000283961258174647	0.00250178430097839	0.489440990216624	0.621352508466544	0.351034357234461	0.356010648734738
ANKRD36C	1919.42819404621	-0.347720776599108	0.00088462319937602	0.00638914778292897	1.4606953252391	1.62231859511102	1.22107557870544	1.31331642736403
ANKS1A	1538.34810625944	0.345331016009868	0.000555397644729477	0.00437395135596612	1.21846071763804	1.25048971905739	1.62517683059157	1.65845093867348
ANO4	2005.45309844309	-0.642514617292914	1.13483757999164e-11	5.42204670773533e-10	2.48203580089243	2.61765192386416	1.70674875417501	1.71215662331034
ANPEP	4686.55555859091	-0.807717439917771	6.4637830937017e-21	9.34649707961443e-19	9.69441350507738	9.20815156760445	5.71931071015413	5.59238870137022
ANTXR1	9527.34909178382	-0.422004110931344	5.52809981754525e-05	0.000620297024327117	9.14424954412346	8.57249300928075	7.46550388701139	6.38171116643172
ANXA11	7561.82140044559	-0.46408856444601	1.31945119908284e-09	4.50282786334207e-08	13.8596812595176	14.0933909695684	10.68132510722	10.5346493506883
ANXA3	1455.94041425317	0.560108140192639	5.171210107779e-08	1.25486839051398e-06	4.18823761321331	4.22628708735478	6.35222901914896	6.63937150090077
AOX1	7005.4743279656	0.368238157262895	5.14737524049267e-05	0.00058317516254564	6.82332027876171	7.52821865678408	9.28836570183907	10.0985904310389
AP1M1	3142.05507950856	-0.551908834437886	9.648792795679e-09	2.67988054954839e-07	8.53893118249041	9.54819576633068	6.2939162883666	6.61391124491611
AP1S2	2671.09413135889	-0.629717351723038	3.07025602908742e-11	1.36276617291077e-09	8.07613629265219	8.04215373752353	5.66288103322342	5.24480362107917
AP3M1	3138.34428454738	0.474927343071919	3.57375430730188e-08	8.98306055810326e-07	2.6085018731993	2.71247921918849	3.86581154404913	3.874922082196
AP4E1	2857.64451587022	0.407506298506035	4.90556378301576e-06	7.43842568871125e-05	2.0661095437082	2.1254570502962	2.96309062606585	2.85661537720014
AP5Z1	1843.07579122563	0.49248595921522	6.94669696365158e-06	0.00010044780578575	1.53032940344972	1.68259654549805	2.23262610329502	2.49602567393705
APBA1	1635.45695735538	-1.18116224410161	1.336380041818e-28	3.74881329330785e-26	1.10716586869467	1.13919096144496	0.543091705766928	0.493803183849754
APBB3	490.497650832342	0.66292988520541	5.80509801349211e-06	8.56175654439961e-05	1.02373075187978	1.01138057613038	1.68557383771807	1.6902118709482
API5	3664.98410300713	-0.993206632168684	3.10544318548755e-32	1.14623542420127e-29	7.24100374898444	7.49916873935457	3.89376915179712	3.8577567923667
APLP2	13002.0595186747	-1.1498655880807	2.87529035663474e-29	8.76713533525192e-27	27.9347465979301	23.9855842965328	12.5576710470156	11.9574558482501
APOBEC3C	1099.34899138286	-0.89730722015766	8.50217999954789e-16	6.77565776554879e-14	7.543024836441	7.37828912192091	4.10103363588081	4.29150143006666
APOL1	1088.93881727554	0.737275862057012	2.25437625228812e-05	0.000286152772077767	1.52501381779809	1.5668692722637	2.19827690046364	3.20087392659546
APOL2	2105.23722747196	0.494702830973923	0.000388442527715747	0.00326049963718795	3.69693454615325	3.60669852331521	4.64227057121511	6.14118650709533
APOL6	5742.46882401075	0.416277173532756	0.000445053019790394	0.00364408269444253	2.82219612231231	2.79106246595018	3.4681732390394	4.37900879188293
APOLD1	517.344670976039	0.685230940420585	3.79229131029117e-06	5.91664937910389e-05	0.448864543245178	0.503942055599032	0.815113332423923	0.785262197778483
APTX	756.610420769537	-0.449870907711624	0.000262766208074601	0.00234599543886337	2.08944403071593	2.16548686426912	1.6246924798423	1.63569706779945
ARFGEF1	6287.31874199833	-0.329995167241912	9.40028996667294e-05	0.000979557704848102	5.62330553705449	5.59028301696912	4.82808103568701	4.5125238562342
ARFRP1	1483.00574870014	0.460055430329354	9.56609330455649e-06	0.000132321523362632	2.67944834795005	2.72073414796172	3.76253927560822	4.01588900503082
ARHGAP11A	1591.5382662947	-0.501109877359305	0.00330727013341783	0.0190817650725292	0.722805808120847	0.998991594828697	0.555273756920224	0.716372616022314
ARHGAP19	697.315529503695	-0.54751235002567	5.26438326059262e-05	0.000593554980812477	0.801772051484586	0.92158120045014	0.608374906154506	0.62388682581269
ARHGAP21	7303.32122929372	0.457097031674367	5.90840751762953e-09	1.73734431535161e-07	4.84277850948357	5.09709741948854	7.05743941678457	7.22566965233477
ARHGAP26	405.853311620539	1.50597470999178	7.25906062028734e-20	9.34087928992204e-18	0.13796431844005	0.132177131720459	0.4087590243632	0.395886398334142
ARHGAP27	99.4902802594846	1.13828424739316	0.00319400831293864	0.0185180085602461	0.0172824911074534	0.0308154268254856	0.0417515398590555	0.0679016214116058
ARHGAP31	1912.72624319253	-0.494146898461647	3.34330615644009e-05	0.000398751803998544	1.70446028262795	1.49662241061184	1.25778717143691	1.12446576292634
ARHGDIA	14717.9925495404	0.362976272803607	0.000201982009154592	0.00187243863873252	29.1055869320489	33.4700479109175	39.9883572028519	44.2347731178323
ARID1B	4106.09874211859	-0.360486302395556	2.38029081791344e-05	0.000299963692830673	2.80664276756334	2.73380232257284	2.29812456284078	2.2216083814388
ARID5A	462.517358481913	0.616991587162507	4.54232960090118e-05	0.000520512377305882	0.718826478282325	0.779014060321557	1.17870504969101	1.22296314554926
ARL2	576.955270911162	0.541251428583791	0.000175515192999029	0.00165776168148444	2.66589605376151	2.88761044308866	4.0033008462926	4.44838567124652
ARL5B	1841.18989563642	0.663714448769361	3.51607822247617e-11	1.53633997347198e-09	2.28583663292315	2.30763641409882	3.92581245115489	3.69289520906195
ARMCX1	730.220832156839	-1.10096371411269	7.3006790917111e-18	7.75752461669241e-16	2.7551567680972	2.64562543809441	1.33519825416451	1.30309173515907
ARMCX3	3791.71049346953	-0.414388128515735	3.3075022282549e-06	5.25379685770138e-05	7.44319662141892	7.01737494448868	5.7451036462321	5.62217726691564
ARNTL	774.407546432243	0.456532113426907	0.000584678724057639	0.00455089000201579	1.36651786297894	1.21638545399219	1.81133622258942	1.9087733772295
ARPC2	13504.7844680774	-0.429752317291788	1.34420930475097e-08	3.61935677459168e-07	57.9246553668126	56.2156672695586	44.3838465737509	44.3585584604829
ARPIN	1968.54463102778	-0.47670806813547	5.16140605654788e-07	1.0068690034651e-05	1.93126055300525	2.00475014405299	1.49871619316823	1.46180589508574
ARPP19	10563.2768400435	0.326615010453487	4.1344824536602e-05	0.000480051745819851	8.64326474566313	8.61438019159261	11.6442884478761	11.0161218552743
ARRDC2	278.567840175601	-0.566189362685075	0.00416460992598018	0.0229450503903426	0.590010749046984	0.71856354746885	0.486816956755563	0.435473206742204
ARRDC4	1598.56437440565	1.28054798462953	1.93975381551244e-19	2.36582495794586e-17	1.25882966222319	1.39570048621888	2.94873505739119	3.7984113114226
ARSA	1686.77170667369	0.492075399612171	9.09910832077613e-06	0.000126611203677784	1.74592296831257	2.01746025948084	2.70293105277746	2.82972684288595
ARSI	260.471629844429	-0.602094932802816	0.00136045193306935	0.00910211193186911	0.584590101637261	0.559521979467108	0.389128054909302	0.40098172053395
ARSK	1442.94723417688	-0.357941717131793	0.000734870321225032	0.00550015534978778	2.87741741230852	2.72653998344388	2.33269900168294	2.24936945821126
ARVCF	534.059903246682	0.801900767310308	2.70554986043456e-08	6.96294354907435e-07	0.533538187218912	0.583952447416387	1.02006313700208	1.01609854223841
ASB13	278.142922141022	0.490905878343243	0.00921562049410152	0.0432881088580937	0.468517642272072	0.484682171605644	0.658909159376252	0.743254685377843
ASPH	57753.6460510801	-0.445581296822962	3.40517451400034e-10	1.27703149019702e-08	31.4248318977731	32.6189501120767	24.7464076746394	24.486085270117
ASXL1	8197.78304275016	0.450008060072749	1.00701392261959e-08	2.78587323050541e-07	5.46180669629144	5.33352429227986	7.80765642809837	7.63659141957222
ATAD1	2486.71471458016	0.357269966357062	9.43528405236587e-05	0.000982474343864022	2.60261456240056	2.55684308015422	3.51074463044957	3.41181833604047
ATAD2	1710.75465413843	-0.565033031670798	3.01584333742236e-06	4.83984195087941e-05	1.96073517969372	2.28796058622778	1.40499796189746	1.59855912068687
ATAD3B	622.664624218387	0.43999035075589	0.00238989837019558	0.0145678898480501	0.974492122444493	1.07026392806243	1.3528786581656	1.5477751815872
ATAT1	358.764724737638	-0.574130607236992	0.000476958519119345	0.00386471414741071	0.0954103590707441	0.0916275546695304	0.0658892649490274	0.0657842900744184
ATF1	1261.97051896083	0.336269495077451	0.00193470956442323	0.0122788399776471	2.58382900933694	2.56746346781608	3.49582739286616	3.31510972782407
ATF2	2967.89599779556	0.46242711660762	3.33392600820937e-06	5.28380182950786e-05	3.10026641002733	2.84776236421403	4.42822857904361	4.16073962566726
ATF3	872.051660189797	0.654793703284065	5.57825053543622e-05	0.000624924456949109	1.70685820819584	1.36627001381706	2.28186885949731	2.80124165659523
ATG12	2414.67754531478	-0.775212252413096	2.30371724911894e-17	2.28636201180528e-15	3.77752885525986	3.95470924622069	2.3230112974747	2.40608632126309
ATG2A	1846.32514388857	0.51474041422276	3.08654355613817e-06	4.94199314136917e-05	1.28533757696826	1.4779585135087	1.99044813247855	2.13706635624699
ATG4B	1913.42911772005	0.326201021357615	0.000875876451557131	0.00633576230507494	3.47447784153575	3.3028672031676	4.41214910047382	4.49253085596757
ATIC	1754.11040708637	-0.354604207847788	0.000321646391800889	0.00277796323362024	5.33316552268058	5.59883806423892	4.36937600957885	4.57914189255779
ATL1	623.273443848116	0.344934014934947	0.0102629411704835	0.0472115489856354	1.05862312712834	1.10989156045242	1.40132644877575	1.48069352850888
ATP11B	4896.09507473334	0.357675588028143	0.000118366112037499	0.00118585934816997	3.40378139569312	3.37956804810279	4.78130184122717	4.31939493993276
ATP1A2	211.034858245376	0.768672607446258	0.000574298813427737	0.00449504194036687	0.180813295698183	0.149032992655582	0.312426594438018	0.278799268726606
ATP1B1	2793.36204267529	0.491370555241411	4.83905214487767e-08	1.18451213584737e-06	6.04204530362126	6.17121843667713	8.74031552894836	9.23616769892341
ATP6V0A1	2656.05893502905	0.568526358453764	6.42670957558519e-08	1.53562229143369e-06	2.80231051216877	3.151154315966	4.38138265010383	4.85404020106191
ATP6V0B	1312.85416495696	0.423434653333161	0.000868912195966251	0.00630163519163528	2.98879408904323	3.29058882463406	4.0261006469431	4.78434514884314
ATP6V0C	2726.74182757997	0.371073428676918	0.000703021237906458	0.00530138488326665	10.278893456158	12.0941314959896	14.5186955505043	15.7380710708134
ATP6V1B2	3734.53330662504	0.99527039051624	2.73292493119775e-23	4.85215254240249e-21	4.61754088923377	4.86908220616608	9.2526121140019	10.5439714163858
ATP6V1E1	2988.87197021756	0.36011568955063	4.88885449321974e-05	0.000556583385729708	10.8356100521768	10.7009610647567	14.1377831688892	14.8162027837025
ATP6V1E2	58.3068820292288	-0.996321050410801	0.00978792047181594	0.0454286474313998	0.273032944051441	0.29209770707426	0.127861088090729	0.168571247158012
ATP6V1H	2056.48612355104	0.337929467287168	0.00111425990821786	0.00769503174429527	4.27975777325953	4.67398299380178	5.6517807248129	6.18827990599367
ATP8B2	6694.04442548092	-0.32745109891552	0.000345243380320571	0.00295515171886288	7.17641978319349	6.49229127170405	5.7548738572711	5.65846506519695
ATP8B4	110.71102849785	-0.704475030258248	0.0105753954746322	0.0483952189882427	0.137106448038651	0.132576176567762	0.08807859916036	0.0853602249104658
ATP9A	10128.7133913172	-0.326824122177401	0.00458986340013388	0.0247035395434681	9.10737170754888	7.99166767569158	7.73739877132302	6.54226051701914
AUTS2	113.517221344076	-0.94188786588464	0.000671822219646513	0.00509901431426515	0.13020701818017	0.116082363819799	0.0684422607971488	0.0661217687480802
AVIL	180.231474835549	-0.915950168947012	0.000276609333087935	0.00244777445166648	0.520072735084409	0.387919408977586	0.271688802874591	0.234453464919649
AVPI1	1241.85983870992	0.639589954074947	2.66380618252534e-07	5.57649933076125e-06	3.81611734782308	4.2626247966432	6.12396525089176	7.03771525790035
B3GLCT	1006.53132563448	-0.348327832597676	0.00229510543784467	0.0140706292273034	1.56282775843131	1.53249278432872	1.29796137245828	1.24888076176528
B3GNT2	415.848530490828	-1.02439617394229	5.219876659689e-11	2.21860575844842e-09	1.10191723961649	1.16718769327694	0.590961472187608	0.576103714491379
B4GALT3	870.220909859604	0.333685516794562	0.0104601194616831	0.0480083886026069	1.96833414441381	1.71472196484486	2.44080299943222	2.4310861094748
BAALC	553.752847360381	-1.2525509429357	1.18133095197137e-16	1.05537247976754e-14	1.68809329508613	1.476814033378	0.710629312721943	0.682922523610393
BAHD1	1429.26374885956	0.322158335632104	0.00198689840851061	0.0124969672994483	1.51802087077597	1.52337559825943	2.03683600412712	1.9446693938069
BAIAP2L1	835.172103368815	0.59266465538901	9.52917592256328e-07	1.7425843740531e-05	1.05851120729909	1.04016459662986	1.63913535105241	1.67681164248817
BAMBI	748.451888160541	0.383350159577079	0.00467891536183242	0.0250291635640967	2.32531850708364	2.02653978779745	2.97521245760605	2.98405063500273
BBC3	386.888293974326	0.525706830894662	0.00132098566122289	0.00889920503569275	0.90937192017493	0.839773438582436	1.28774672203499	1.35465887750859
BCAS4	468.942952107825	-0.444804166993633	0.0057498601395842	0.0295954269056176	2.23367328775635	2.30653397909524	1.89451842268154	1.59594644751296
BCKDHB	905.410344617878	-0.510995296569071	4.54161009219692e-05	0.000520512377305882	1.57778985237562	1.64324334446605	1.24919978872375	1.11607850783463
BCL2L13	3884.58865568912	0.343362485339644	9.62455696639788e-05	0.000997738625356221	3.53000445248789	3.65787265246758	4.59926018451	4.94795179180995
BCL6	989.325235151046	0.586579285392294	1.8439096997288e-06	3.11223555335693e-05	1.19117233017501	1.10858165762886	1.88134935213674	1.73952264972381
BCL7A	731.975532546315	0.544709185914515	0.00035617741532975	0.00303139831760624	0.948153579108858	0.870892330473707	1.24576402194804	1.53778313072587
BDKRB1	3229.77525485313	-0.576433796637486	6.36160334643455e-06	9.24640917482808e-05	15.2637018200801	19.1552725680975	11.2245594656919	12.9160276664252
BEND7	313.265630346671	0.515554295845564	0.00386011655949532	0.0216286318891998	0.481369006171401	0.482794702603695	0.754546508876109	0.688734943279131
BEST3	32.9786000152501	1.79778319999605	0.00310669940433514	0.0180957499357163	0.00921402935594107	0.0231032976035609	0.0440481606677323	0.0705924094952251
BEX4	463.852439169316	0.412486521007805	0.00631501684453158	0.0318500270526461	1.83458727324085	1.75425032705378	2.56153889015105	2.44576056259906
BFSP1	51.7837804561476	-1.88807700621113	7.75664150109912e-06	0.000110545826942924	0.167051362734906	0.146171930361433	0.0498997984279134	0.0388937702134901
BICC1	3422.45162463827	-0.551831649709684	3.06130710936386e-05	0.000370793553678217	4.46225959897721	4.13949270303679	3.45711326583425	2.687271781787
BIRC2	5258.38390755597	-0.527231712591862	2.77276860406342e-09	8.89408584949495e-08	8.09571623988352	8.75206866058557	5.89055882938223	6.34548669281725
BIRC3	2330.71223994031	0.574807982754849	1.00074215905705e-05	0.000137342558932819	1.4142521798121	1.72434375066559	2.23497624485756	2.65300422751286
BIVM	695.097980763742	-0.339068290407359	0.00979571012704657	0.0454327787376971	1.15008162555546	1.16203223875529	0.996127755903215	0.917523811587498
BLVRA	911.326345933404	-0.392535505722867	0.000813769713764024	0.00598842287788783	5.15464953252501	5.02866179015297	4.1138832253302	4.01309644934407
BMP2	619.766287645626	-0.62626059792316	2.08835762870024e-05	0.000267745010056212	1.38818304266295	1.36083021645634	1.00848858173022	0.856627608507764
BMP3	32.7848081446795	1.58181283620747	0.00472090009141193	0.0252056888778621	0.0117127893760277	0.0213590541331479	0.0581751862137811	0.04350856810344
BMP5	27.2846531720414	-2.44647420038743	0.000108607979777219	0.00110546845018525	0.0531466141616359	0.0815237973472957	0.0170803519019605	0.00859802143164086
BMPER	2036.75267522538	0.564906523153759	1.41893463124288e-07	3.13911311321965e-06	1.86379155104809	1.91508565366132	2.73319338142337	3.12002195031247
BMPR1B	406.593992079135	0.761101856125314	8.86526825716915e-06	0.000123821545106112	0.311117653739139	0.275041182089875	0.552471880412794	0.490583992501473
BMS1	1948.62005696373	-0.348607941945959	0.000410913837431998	0.00341034170640308	1.51131605263464	1.62818767448252	1.31378728132863	1.26573113248491
BMT2	1923.48666178532	0.646127241392357	5.83699267780137e-11	2.47340360419462e-09	2.24171584226947	2.15783158591554	3.67132860744619	3.54280609985762
BNIP2	4371.71475654571	-0.459307542918632	1.96124724027601e-07	4.20618559512406e-06	4.52834406979053	4.40251590119194	3.50924710179574	3.29351508825599
BRAP	1074.0404775955	0.474046838432247	1.93254984283954e-05	0.000248906741007046	1.276186442051	1.3015559831499	1.85051453794966	1.89808657533477
BRCA1	769.085284476583	-0.474037050724383	0.00116702982676316	0.00799105422961708	0.662542778346086	0.743975138477505	0.478955154392927	0.580228802213026
BRK1	3607.15785733152	-0.463582559937113	3.9988619436773e-07	8.08184980144348e-06	20.395265731964	20.7467612479977	16.2562020990914	14.977226924443
BRWD3	3308.69360023167	0.392885223146943	8.2018851409315e-05	0.000874161405674052	1.34852681810437	1.237053816929	1.84418724879882	1.7133586688127
BTBD10	2073.27488346874	-0.351612436162631	0.000159208966707607	0.00152531760043777	4.54486254976876	4.66056607911899	3.71799111139403	3.83495968525205
BTN2A2	829.711906819721	0.40434703395024	0.000795458653965542	0.00588144600976315	1.05454423420272	1.07639204824578	1.45130138092187	1.50136923413525
BTN3A1	1365.31388019835	-0.352291494853814	0.00100114862341471	0.00703160270005743	2.17516059292089	2.04942952915081	1.70695518703356	1.76156715603477
BTRC	2418.65945830008	0.432842722424551	1.61790405364697e-06	2.78097086476133e-05	1.93397976793085	1.92927377471646	2.70541365585713	2.75617320550922
BUB1B	1054.97436077549	-0.573241923018829	0.000871061612779186	0.00631395874978856	1.6218932384445	2.28646828933037	1.25035296539392	1.49338513651301
BVES	2014.31894628634	-0.450309265600448	1.81057465917051e-06	3.06334380814543e-05	2.32698424633853	2.32312101066226	1.80616425529623	1.75772857005651
BZW2	1608.74349281968	-0.395672694900708	6.22763356810898e-05	0.000686164873733673	5.52975322967257	5.76434306110945	4.47112180233408	4.51442358134292
C11orf57	956.186385252376	-0.403594195232679	0.000475424117472218	0.00385896913869522	1.64247869381215	1.68958288323196	1.34470512395789	1.29192465716482
C11orf95	1079.75126115392	-0.865452112550665	3.80885819621851e-11	1.64885941543706e-09	1.54752115541867	1.33950783836947	0.867699711454974	0.794081432180103
C12orf10	760.029336988988	-0.426656695889612	0.000540445481630428	0.00429234899510101	4.06048623302462	4.24156007736842	3.21704060082199	3.24685753940551
C12orf49	2644.50476119356	0.510994721253785	1.46650510067164e-07	3.23116749518995e-06	2.45733344673418	2.32074419113638	3.43670077890954	3.69926695487445
C12orf57	952.451486817052	-0.604735028023756	4.46241272467025e-06	6.85539987691401e-05	6.45090878700088	5.75875174346995	4.43839089151989	3.97992658012729
C12orf65	298.837162347486	0.574460354687386	0.00151655855319425	0.00999100511889875	0.693484970597473	0.636831040705924	1.0244524734291	1.05477899504693
C12orf75	7346.46840794545	-0.483908967787306	1.26334330039387e-06	2.22888718633012e-05	33.7630905327628	38.8386660786089	25.8201796969151	28.5046170772495
C14orf1	450.850632952853	2.62981961576512	6.55682635599267e-49	8.36054967901392e-46	0.49161633122702	0.447267839891898	3.19545180907216	2.91311813329546
C14orf119	2257.5074392583	-0.675091323460832	1.06198376538012e-12	5.8643245248904e-11	5.54399385979505	5.35963869523825	3.64290391626207	3.5102783205075
C14orf132	2442.07379998081	-0.342664227589275	0.00330402858286004	0.0190787587086023	2.15543025285435	1.86211226067048	1.74210645344019	1.57888807237794
C15orf52	3948.30141028783	-0.396686019979631	2.22277135491878e-05	0.000283145159061407	4.72384189362168	5.02564683957504	3.68149627314518	4.07075929059059
C16orf45	966.519382413452	-0.356557490509149	0.00262481231183049	0.0157331698656985	1.38021046309879	1.29838855878611	1.06794776571824	1.1251413579932
C18orf25	2194.98437425526	-0.549916232889847	3.91518556744992e-08	9.77124426495598e-07	2.7430601828921	2.77584684144753	1.86990271677035	2.07787015479207
C18orf54	908.885737223371	-0.892787303260421	7.06689531044504e-11	2.95000814358042e-09	1.11730019155225	1.28569425053462	0.626175275769447	0.727206072017979
C19orf25	653.101636152338	0.363045897548945	0.0100457345025063	0.0463186956384461	1.35275994481318	1.58105579736624	1.91636921217639	2.02441255417093
C19orf43	1217.62885357241	-0.949065847845465	6.75138289012545e-17	6.18920891613722e-15	8.23118150758499	8.55381838072961	4.30922585236184	4.79253625754181
C1GALT1	2003.44927366957	0.562562925874048	4.4814718370185e-09	1.36054380922125e-07	1.45365606136951	1.5487721720487	2.30021586917268	2.33925106141171
C1orf216	984.844701772491	-0.481899244778041	9.53698847389829e-05	0.000991592293068179	2.28217280986816	2.24296955278284	1.58643602507067	1.80825542170476
C1orf220	180.783346327865	-0.621062527861476	0.00495026278899014	0.0262603577452253	0.481618065287258	0.502366279346161	0.32139637717401	0.348172442784246
C1orf52	780.858949303602	0.368519165711213	0.00269882259161781	0.0161079513489495	1.16790675989451	1.15790183720388	1.58020966578522	1.56502106409491
C1QTNF6	501.342212696672	-0.546004884881842	0.000418111184082624	0.00345576161929457	1.24282066671699	1.09952181545928	0.874337496032385	0.808842383014798
C1QTNF9B-AS1	94.0168292040504	-0.982994766482332	0.00276542411078997	0.0164564440296734	0.665135835148014	0.935323601014702	0.465618211793066	0.377172873852091
C1RL	1618.17827101156	-0.64196641692489	1.65594546429351e-07	3.60097536157841e-06	3.20232703827846	2.89190557641785	2.19264795380673	1.89996119462127
C2CD2	4185.07149661908	-0.496001074207781	4.85914212411824e-08	1.18735762078192e-06	4.24394971641861	4.5215490180449	3.37232230925088	3.13196731324842
C2CD3	2483.67279394653	0.387462666340858	7.07649307626099e-05	0.000768226717396569	1.53978184455032	1.51961038513047	2.18037848449779	2.01057000220379
C3	1008.98011054227	0.51917977399512	0.00284016133211531	0.0168013930173974	0.781147526541738	1.09312631361235	1.25900793433004	1.54498719257201
C3orf38	1156.0325214986	0.408828112733123	0.000196393294180484	0.00182424658554667	2.21562897193213	2.15198344808128	2.99081507904596	3.08523723080576
C3orf52	431.672211070693	0.583844598299752	0.00298692380882469	0.0175585051729149	0.745108239978192	0.992822904975702	1.20510137801565	1.51129566752023
C4orf22	123.339890381535	1.10078349832092	8.18681243600371e-05	0.000873218488421202	0.452631887119044	0.508800064432924	0.983035898048202	1.17010735940508
C4orf3	5805.60718971931	-0.570585764868381	1.83428586462299e-12	9.85735384567128e-11	12.8011919224869	13.6136971504953	9.31417755542479	9.30187534491912
C5orf15	3357.18877982824	-0.37108099303392	3.64952107763885e-05	0.000430152795251786	9.34792160365349	9.86312490018794	7.98614761407891	7.55923698977014
C5orf22	1049.83944718087	-0.504945454203154	3.75213613995967e-05	0.000440766009204977	1.91564185490513	2.03102291730121	1.54208880336183	1.36757985167304
C7	365.042884175023	0.69101041304929	0.000782093832610797	0.0058087646234635	0.439064337575554	0.363869454872705	0.7722570665617	0.589189990944298
C9orf69	1133.79429070764	0.575612203083521	3.47835605245813e-07	7.07064086837358e-06	1.56835429163598	1.72188408485722	2.55549396061677	2.57128171122389
CA12	1364.26478574287	-0.916576664689679	2.40354515795571e-12	1.27215563718818e-10	1.47438151780412	1.72007177554938	0.812119686256205	0.957913252816044
CAB39L	963.094438834696	0.609216378988004	1.16318421957583e-07	2.6103714982033e-06	1.04616301124122	1.06714662741138	1.69336917922386	1.68148497948839
CACNA2D1	5301.82222236551	0.460310890283566	7.84661394081751e-06	0.000111619277012075	3.31273061312412	3.25236613257014	5.08185614977849	4.37528207582441
CADM1	8345.22233516926	0.35788585460847	0.000210805588142686	0.00194395738283321	10.1657396120362	9.08438066480372	13.3400169436989	12.5070490634089
CADM4	83.8953011675746	1.09145380804115	0.00106362844069751	0.00739269202637427	0.122630007887285	0.163990943688217	0.320525721353492	0.31373295113616
CALCOCO1	4523.56873482816	0.373770391394902	3.23193696025362e-05	0.000387445707730917	7.78049003851388	7.17895152836164	10.1036105257639	10.208866110037
CALHM2	227.255101602722	-0.53963336654679	0.0104554006119327	0.0480024382922971	0.81829232129562	0.779201089457892	0.628735478041786	0.52290818166645
CALM1	10429.4885204031	-0.435465215070158	8.7010572104488e-09	2.44571199266042e-07	16.4356374410862	16.1586851938117	12.6732174939165	12.5665716728343
CAMK1	709.171733708345	-0.48015657028375	0.00043862265585254	0.00360194459659703	2.98636448910221	3.42627477983018	2.31462154812373	2.49044605071946
CAMK2D	7796.8757874446	0.446602167469415	2.67248709364561e-08	6.89049705431494e-07	5.31597846571802	5.53482792259739	7.51712818968158	7.96435671124397
CAMK4	479.41799805794	-1.48829574943516	1.31962055919644e-21	2.03395582014168e-19	0.332655019225484	0.339780879766599	0.133800536809899	0.117066634928123
CAMKK1	200.95280432101	1.12667953524253	1.56348413876962e-06	2.69072742704083e-05	0.144381984833901	0.183796811056087	0.343487568953313	0.402540733009065
CAMSAP2	5256.13148099387	-0.585373095184953	4.93649247710099e-12	2.51147904481816e-10	4.94990365577107	4.9277770219256	3.55133166741524	3.34173517979617
CAND1	9243.45929692319	0.333854351791997	2.40709297751001e-05	0.000301810143601046	7.66515679014533	7.5233238572768	10.2204143893252	9.82619978188486
CAP1	20708.1895214913	-0.49101911080355	9.72596801784729e-12	4.72029160617045e-10	49.6205734599355	51.3514138123898	37.3436803087359	37.8727053045077
CAP2	3097.58118048891	0.328615418383618	0.000213323131412322	0.00196201327291097	5.06784399156638	5.43377347783699	6.85322418161558	6.94636054559179
CAPN10	730.464581446205	0.327222677094681	0.010196662184989	0.0469374413543339	1.38946447525188	1.44693750912662	1.80623706213725	1.91806304770687
CAPN15	2557.68647839991	0.456966690578615	0.000857359911221125	0.00624420120327934	2.25778873927838	3.00880517255953	3.61016341802532	3.9440109216402
CAPN2	40279.1708556415	-0.424402801561168	9.30908198903455e-09	2.59615488703192e-07	71.2042833519512	72.0942995103482	54.3246520509955	57.4859876782843
CAPN5	1775.25932620074	-0.395295114252141	5.64438558278823e-05	0.000630319682995126	2.6646122855949	2.65029241637292	2.15916380130789	2.07270793120807
CARS2	1970.11106101652	0.335421290326021	0.000588762419297974	0.00457787311823359	5.13290697211438	5.42958717627011	6.78191458193309	7.16502858336735
CASC4	6769.98153787748	-0.401322439739707	8.0735729714966e-06	0.000114383772220415	11.3243357250584	11.0434203159982	9.28590674794738	8.44818561237758
CASD1	1086.45735711059	0.582868975558372	2.66901652759424e-06	4.34792402044561e-05	1.36943422226598	1.22159326348097	2.1089639453978	1.96233935386594
CASKIN2	1190.27337417833	0.406861491196782	0.000357418124276093	0.00304011316621982	1.11893358153	1.16790648260929	1.65221315207852	1.52031561803742
CASP3	2327.80438983533	-0.701048267331126	2.5266839744286e-07	5.31323379690188e-06	5.64149888293301	6.84573266768947	3.59502565733403	4.44030298399428
CASP4	3258.00777395106	0.484629366968735	3.8727183651629e-08	9.68248623703652e-07	11.2822020678571	10.8679085014194	16.0026773716965	16.468710538528
CASP6	360.055246880938	-0.453502081286936	0.00594157500213078	0.0304258966702762	1.48322851425457	1.41392737704596	1.12558152840812	1.09210475368577
CATSPERG	36.833266927212	1.64246356501906	0.00100245198119349	0.00703723297708706	0.0265482300373318	0.0288457643020289	0.0880636325334848	0.0925715928547215
CAV1	46810.6184342662	-0.528497278708583	5.14120636391929e-12	2.60326933069791e-10	84.0951927934553	90.8206772051494	64.0433017525636	62.8880898408414
CAV2	7944.85138878724	0.983979672997219	3.11340091329385e-34	1.40866326483418e-31	9.27280850872897	9.40068008151861	19.832564019455	18.8355817439181
CBFB	2228.57245278439	-0.441765214500613	2.50654488778445e-05	0.00031114347181058	4.55965639047653	4.9241275659148	3.43976604892601	3.86773747356625
CBR4	645.656390945007	-0.491838002479757	0.000283739401491454	0.0025014009084344	1.19646184535212	1.29896888476467	0.958739032851692	0.896984103882465
CBX1	3567.70298146132	0.73281901777204	9.3701926272031e-15	6.63769301965407e-13	5.64213133796473	5.95112628324478	9.58021090619784	10.5871974661434
CBX4	738.670839388665	0.350318579574558	0.00830052323000813	0.0399200689880826	1.32124798300175	1.51939285847926	1.89242064249476	1.89051216097027
CBX6	3873.15536685298	0.958513114448959	8.84871401791519e-28	2.25658296027779e-25	2.46716060637075	2.47143900414104	5.16247155162434	4.88658900073152
CC2D1B	2469.97747059961	0.340163835503532	0.000387328545682234	0.00325309591720899	2.16440385158442	2.2985092404927	2.84664835514368	3.06601864096843
CC2D2A	790.729908782879	-0.859210177638702	1.72727075277397e-12	9.31909627994018e-11	0.92025136152132	0.918771276225065	0.530194425716178	0.531504475584111
CCDC113	20.132673215052	1.9321137194287	0.00963792839210647	0.044849553200505	0.0047137476424051	0.0141831258056953	0.0303523534083317	0.0425959164952052
CCDC115	703.951369902712	0.645443044774643	5.62005124012283e-06	8.32384780295278e-05	1.3762628050289	1.17028737614258	2.1191527804713	2.06493651599204
CCDC117	1822.11125829167	0.553836611726657	3.30260925051958e-08	8.37656371569398e-07	2.03608584009338	2.15505837779593	3.11893831456871	3.31942782709007
CCDC136	589.123644314967	-0.395080351888861	0.0038612643840408	0.0216286318891998	0.853401160379507	0.922500958540351	0.711593711888152	0.700766476782886
CCDC138	134.79262456903	-0.653185307691513	0.00964076735345233	0.044849553200505	0.360707935694056	0.39377008299877	0.245143524332042	0.256444743609597
CCDC148	49.809886719175	1.68470132998204	0.00011919908508534	0.00119335215375231	0.0395794987087277	0.0529289645803231	0.154458704258965	0.153868011214681
CCDC171	104.459445337808	0.7704461553264	0.0080859310685162	0.0391080238506925	0.0968075513749459	0.108517126968192	0.174450439762937	0.191293507989973
CCDC183	51.0895207570742	1.28547725647201	0.00237245641472844	0.0144867538846239	0.112106708571105	0.0870493478936966	0.268142470855162	0.244383656109792
CCDC50	13349.9602447429	-0.459866411703642	6.05840794034707e-10	2.20143082309088e-08	9.84554712860333	10.1431701656319	7.68497636706473	7.52942254945295
CCDC57	1641.08659798828	-0.469849753381208	3.05489733740453e-05	0.000370336992691754	1.49679816433541	1.45402278000958	1.18640136721928	1.04496942996475
CCDC81	814.327291978126	0.419704034822396	0.00108759124933174	0.00752939529275766	1.43928207746889	1.45921125498322	1.91406194479917	2.14620607090686
CCL2	658.868468651325	-0.37065284980544	0.00975373301083316	0.0452849583614518	5.2586019707982	6.2656885375479	4.74624075742717	4.56296948048314
CCNC	1998.4151595745	0.463870208075195	2.52913601994673e-06	4.14411937100151e-05	4.15592863092529	4.26985792828318	6.27534498064249	5.88876885274316
CCND3	1767.04115742854	0.532300568519662	7.89218400674694e-06	0.000112153771913508	2.55214913084284	2.73823119033997	3.66212100491192	4.34563595157686
CCNG1	5881.13464943058	-1.26403646680156	4.40584717628352e-34	1.87261856044099e-31	20.0451507310438	18.8738364481379	9.10020604666827	7.86966310882354
CCNL2	6854.04914754691	-0.349676330685498	5.47749106839078e-05	0.000615603283054881	8.64480204608107	8.21522920247151	7.13425732873043	6.72354645859766
CCPG1	439.593551175822	-0.441053667997794	0.00430062645340997	0.0234527941817762	0.414110855286042	0.396380043226316	0.32388348307518	0.301773359948885
CCT8	5855.45446828377	-0.324836635976952	4.08041585022249e-05	0.000474559806925544	16.3518174965359	16.1887470921741	13.4258048156395	13.7821481815543
CD109	15496.3344084754	-0.386407797293177	1.11478798978895e-06	1.99693695335629e-05	11.0736219141745	11.1211525606004	9.17529147245658	8.6018620986099
CD164	19056.8542671421	0.420235546230766	5.27958513127012e-09	1.56888688667785e-07	29.9235107522564	30.6828065449179	42.1207052695866	42.7899024028341
CD177	66.2331711198095	1.71810532704383	6.74936987402784e-06	9.77961382780109e-05	0.0754061731877185	0.0859001815848689	0.259395353254572	0.294070685431677
CD248	9610.90444648746	-0.478374422125094	1.19718240822669e-06	2.13297479488368e-05	23.4276583986444	27.2124837135582	18.2398098009102	19.7968891261775
CD274	1510.9790677184	0.369478283792334	0.000549781929569549	0.00433703112718925	1.94671022457875	2.06649307408402	2.59814345786405	2.82730888807217
CD44	109205.151276788	-0.413670652739404	3.2980809470043e-08	8.37656371569398e-07	107.637061571001	108.499534265509	87.2511736535225	82.6233827569425
CD47	16460.2243412571	0.504915881425456	5.25580450641986e-12	2.65172352543327e-10	14.5286008269114	14.9255599999624	21.5638119128546	22.1969542143593
CD69	96.6027272426882	-1.18322478185337	0.000186000953762137	0.00173923291831182	0.422102601384129	0.505052421788965	0.182064729551626	0.244397220169076
CD82	1878.03745378125	-0.469889911625856	2.64577612812232e-06	4.32009964761859e-05	7.69192183589021	7.22394619918453	5.5624344121239	5.72410897955345
CD9	4711.46324220375	-0.494020178237832	1.21121245989222e-08	3.29873125484432e-07	18.6095586365703	19.3438850112283	13.55315030339	14.6608475184809
CDC20	1341.24628466638	-0.465828625069481	0.00315075230264481	0.018314319020678	4.59306978945603	6.17693297849585	3.71219249087536	4.43644845215433
CDC42BPA	9149.71763495074	-0.631054477606148	1.25195173938768e-14	8.77993754832579e-13	6.08101600035931	6.16439081589088	4.27920855174846	3.9986084128163
CDC7	330.846036425638	-0.664115170976926	0.00146568122391795	0.00969243038504155	0.585129986628074	0.792204294799092	0.409889147619251	0.496912047232702
CDCA7	395.168453309357	-0.499909284665103	0.00280186333351303	0.0166168858840819	0.872324293464197	1.03659974349426	0.696360823805705	0.713224892189397
CDCP1	1913.24053206095	-0.740485711040773	4.75672332983613e-15	3.51146323285693e-13	2.17648252739037	2.24317941944203	1.38186973405822	1.38733913889271
CDH2	1798.65153362416	-0.894931368794239	5.90671808475944e-20	7.89025027207961e-18	2.95015789708265	3.13229017269253	1.71606361891526	1.70687158713198
CDH4	731.923609985739	0.461982637152706	0.0027416978387445	0.0163429893269148	0.275851852210667	0.308997936737175	0.374990880106498	0.46751433026848
CDK14	1541.72443507482	-1.44455564398524	1.4974000420448e-38	9.54660590441832e-36	2.23109195567152	2.52819238252719	0.928079904940399	0.900583122013314
CDK15	3164.43594118031	0.350328531927777	4.06512864368371e-05	0.0004731742270233	3.34708514848143	3.37389385256642	4.48648257789092	4.48530588232917
CDK2AP1	4839.49777482364	-0.520214640044559	4.80353049782319e-10	1.76372562205414e-08	14.7686381471068	15.8429813166528	11.1112940436382	11.2272658491294
CDK6	22400.0097533537	-0.373730848133036	2.81242746596568e-07	5.8528567903295e-06	12.1506624044671	12.7246331952946	10.0073739058477	10.0909113043842
CDK7	1405.58089908404	-0.392521386160686	0.00014429151603372	0.00140543944714511	2.86488959793833	2.88954268254531	2.33720002303644	2.25270765113628
CDKN1B	1587.74478497372	0.589617250464546	4.36004291682419e-08	1.06912520894014e-06	2.99455771395021	2.81668955246408	4.73211081718393	4.43353317529894
CDKN2A	590.611601397392	0.589292950599554	5.23077240124541e-05	0.000590239852774482	1.20947437552775	1.42172223374152	2.09310048644313	2.0392253593882
CDKN2B	470.437581787715	0.673072367401665	0.00167556450132058	0.0108424238983016	0.598134821323018	0.452012770162199	1.02121983510216	0.738055417578147
CDKN2C	628.024821870901	-0.563278498626061	0.00284394585828787	0.0168166882834509	1.454996745796	2.04955898043173	1.11412222757254	1.36174497854612
CDR2L	1195.84003938112	-0.519709514337059	8.94535569135795e-06	0.000124719243466189	2.15168970980816	2.4663571254342	1.69309998297112	1.67420314530039
CEBPD	1309.99484192995	0.516247897322363	0.000547969783844053	0.00433248263145247	5.06472213862675	4.90227228210081	8.47515670573054	6.45106887214589
CELSR2	367.373175904276	1.1407510520832	2.34279139250677e-11	1.06578240196375e-09	0.118343017363993	0.133850072567727	0.293642918917393	0.286841555324489
CEND1	87.6422321883932	-2.0310690934371	5.41959434987886e-10	1.97956329040106e-08	0.520279180090663	0.468881845945027	0.120646106538887	0.13331335955239
CENPF	5084.4340776913	-0.475340315011651	0.00201092951829288	0.0126198198763204	2.81110585363243	3.84306750701061	2.21335144802375	2.79288841100667
CENPJ	872.322997107316	-0.439250273329895	0.000661661962590367	0.0050437340691807	1.05918278912559	1.16264342467755	0.805398474145116	0.908715363054933
CEP112	613.466034962213	-0.629012788272799	2.93260936647866e-05	0.000357055373040188	0.978804182102249	1.12483659228539	0.657686343896467	0.764374705327156
CEP41	843.909395571596	0.541092687574883	6.70111612117524e-06	9.71973678548128e-05	0.423768404462177	0.416689707940757	0.638461335867765	0.642785848977151
CEP78	869.266945844655	-0.381742888434565	0.00378891215732759	0.0213084530548022	1.43182247474545	1.55355925863349	1.1111857146497	1.28619933905596
CEP97	1034.00579815887	-0.463923284906491	0.000138049065075793	0.00135214817510689	0.841348195552976	0.963309907420353	0.668003805601391	0.699784519736126
CFAP57	42.6528806577562	1.28165699745918	0.00587864862952081	0.0301697496076322	0.0314700347282785	0.0242794163229932	0.0784104705510743	0.0646750220314238
CFDP1	826.673020461664	-0.435230540127645	0.000393763391693352	0.0032992385495167	4.42012981281249	4.17206176152072	3.28327937244662	3.37795739350857
CFH	1314.3466713685	0.610867183071988	2.59511969809013e-08	6.74058312692819e-07	1.37871785271588	1.37142019495336	2.10789110832149	2.29158538096035
CHAC1	2298.27938507494	-0.365675206232776	0.000108157683664002	0.00110328703350639	8.29657315439234	7.89027718204001	6.60905893375285	6.55360816910927
CHD1L	3078.50997315293	-0.365477066802928	3.2559376403006e-05	0.000389656837396384	6.76568077712331	6.53653765132668	5.36898898347395	5.4474199685529
CHEK1	1230.68475667583	-0.555715604868768	6.0315842447246e-06	8.83079338376902e-05	1.64177958326334	1.81185564626098	1.14132978742735	1.31690068026978
CHKA	369.417794866011	0.454806513585837	0.00517526937693701	0.0271764613556415	0.666930232314348	0.659742426141701	0.95016024575602	0.954801261080118
CHMP1B	1486.0425096739	-0.638397325688268	5.02521841246162e-09	1.50285103311699e-07	3.54289817102365	3.29507384527022	2.36793323034481	2.23577056733477
CHMP2A	1389.7562240544	-0.594891334795903	2.51830396281849e-06	4.13119665292306e-05	10.1470743421403	8.50697314493187	6.57332114267797	6.38250148005804
CHMP2B	1649.31874193092	0.361182147935661	0.000619258676148826	0.00477234551666265	3.00600870843649	3.35674386706568	4.20212310490829	4.34377221356495
CHPF	4631.97498593843	0.608428078225566	3.96339453805198e-13	2.31627382461321e-11	6.46161224384302	6.91123217896145	10.6767449701451	10.6584758532948
CHRNE	30.0054110493436	2.06814147454398	0.000326812139150361	0.00281737373308111	0.0302714574206162	0.0236141997944689	0.116165238850064	0.122898780208135
CHST14	852.51575254858	-0.596438178178174	4.6781165238794e-06	7.14763206578786e-05	2.56639432804582	2.83922920081788	1.96780951405009	1.77037877139764
CHST3	1039.90387853667	-0.387319481056178	0.000785628680623251	0.00582411621269647	0.99674840438455	0.958046339001184	0.803661158220035	0.762250684090461
CIDECP	287.186058447176	1.29175425558352	9.01035455862233e-12	4.40345759718595e-10	1.22876482518678	1.16781271283872	3.16667171781367	2.98772449406479
CIPC	850.374821594711	0.475360640255489	8.4133200783466e-05	0.000893302251467747	0.919143930236832	0.975307727481768	1.35346187765642	1.40188202636739
CISD1	787.996247557674	0.509386162594934	3.39402820731515e-05	0.000404114088589154	1.75159441123323	1.818786280185	2.62624300721894	2.69260943869117
CITED2	13353.8041344308	0.418879751490858	1.98342935669839e-08	5.20965920544037e-07	30.7790798761815	31.6856062668994	42.9188533529808	44.5132838748124
CKAP4	21870.6689755856	-0.546518441699285	9.19793135581701e-12	4.47952031932949e-10	49.6329260418041	49.3056758091413	33.9667173962034	36.9754448508321
CLCC1	2320.64020182209	-0.356877268009573	0.00018217845528221	0.00171377264506257	3.18415745000384	3.03686338020226	2.58919802980287	2.50005060851239
CLCN4	586.682127790545	0.575178754375741	5.89290536362415e-05	0.000652507454196583	0.381225035003149	0.423004089087048	0.599372395852534	0.652999787040267
CLCN5	427.014309049611	-0.537360086774139	0.000560556076671524	0.00440962396600942	0.283666789203912	0.266164243249331	0.193156876474874	0.204096723667209
CLCN6	1674.2682777226	0.327379764894369	0.00222679357617994	0.013716735485068	1.57098151268781	1.43642607659578	2.01444788015016	1.94180878403882
CLCN7	2982.46305535592	0.448494860092635	0.000156001463967495	0.00149765676496105	3.1968048686606	3.71536888605884	4.52946312529064	5.33785934543977
CLDN11	2294.87982670173	-1.16660839208456	4.65216530247142e-27	1.14475913214849e-24	6.69836729905715	6.14493089360071	3.14768191976104	2.84664408857004
CLDND1	3425.51454963816	0.342161143041804	8.29308116905978e-05	0.000882539882224829	6.68413309819734	7.07120139467553	8.96485700584285	9.28454884819
CLEC3B	309.148109490161	0.556205098189011	0.00591892646817485	0.0303653484428019	1.69655470564711	1.30260330496784	2.43685436386836	2.20498264202141
CLIP2	4264.82037987112	-0.393174228692798	7.0871558399971e-06	0.000102267950423662	4.90718118724152	5.16599203320626	3.87009824979754	4.15927989578464
CLMP	7982.55502198047	-0.608817467837042	1.13286468808524e-15	8.8768492263037e-14	18.6190463640245	19.1361666522986	12.8487969030962	13.0711415618713
CMPK1	5728.49994704022	-0.399321223230603	1.39972836575124e-06	2.43580521811748e-05	10.3928695926324	11.1043668526911	8.63904737226647	8.41955191282991
CMTM7	278.37821368801	-0.859268189006384	2.69902523414201e-06	4.39170857703897e-05	0.995705175756136	1.04242804307898	0.598901838525073	0.576638789089515
CMTR1	3532.75550600127	0.507741125424577	3.85266363084798e-05	0.000451063940619981	4.00267355273084	4.18356126426646	5.37435864113178	6.81429534837428
CNN1	3863.07447267892	0.545191582675994	1.0395639742496e-08	2.86462167049604e-07	9.0840550408989	9.97758287272677	13.9288696772105	15.1758425806006
CNPY4	625.377207098009	-0.677349119735407	5.81403413290508e-07	1.11251900065657e-05	3.0964791414708	2.96988402323075	2.04371259004941	1.93124338237217
CNRIP1	711.549579227314	-0.923979327489161	2.35648603586505e-11	1.06619590771107e-09	2.41032551754378	2.25055697274992	1.36380552026878	1.21064009379601
CNST	2790.76048660815	0.322267362597745	0.000705733274270171	0.00531897630570307	2.46262985026378	2.69812301205089	3.28181060492776	3.46880317964838
CNTLN	1422.00944964028	-0.400256498507291	0.000121086175787931	0.00120965434587003	0.820581655699347	0.880291241037555	0.677852436234266	0.670486599849397
CNTNAP1	5506.9300737635	-0.332150429026836	0.000782315440875699	0.0058087646234635	6.68239369882877	6.33434301983237	5.74222032231082	5.08641498718323
COA1	1386.45691869343	-0.519322936653055	4.8654097048094e-07	9.54436874400792e-06	1.54440631737494	1.61699125967	1.1397899654798	1.16871502412776
COBLL1	3001.24577818678	0.589343342617286	1.16812624510062e-07	2.61727455491713e-06	1.3092971431453	1.53490743119729	2.11527780532577	2.35995443370822
COL11A2	98.3095330962413	1.58685314485647	5.4336188726747e-07	1.05119914907773e-05	0.00540302883742659	0.00704474066145932	0.0195038844853992	0.019317569373862
COL13A1	1232.07514379928	-0.521697033236738	1.41387527052105e-06	2.45433348320894e-05	2.65367976847952	2.65694932291045	1.87524881224511	1.99891575643163
COL16A1	7240.62305414586	-0.374099102658225	4.03922469527917e-05	0.000470549547973303	8.70946801935899	8.22142429970797	7.13167178867607	6.55035361932538
COL18A1	6617.51587830691	-0.415901729585028	8.28964997127782e-06	0.000116854905022254	6.55704967973082	6.31282536694479	5.31866001282907	4.78306922368044
COL1A1	550229.02241785	-0.347914512650272	0.00226383387622463	0.0139204445190384	648.284558448465	553.959177572485	532.346144469412	457.043277619117
COL23A1	457.184601065715	-0.806839013650931	2.54183363300358e-05	0.000314607061906677	1.21357610642003	0.980780616620981	0.738463728900606	0.57789723731878
COL27A1	3135.34550488301	-0.563496611941695	2.03362542413796e-10	7.96749446898298e-09	2.74288086533588	2.79775786765572	2.01119972046543	1.91368492191838
COL4A5	9553.21292552806	-0.510919531743173	9.04872043174798e-05	0.000948640124522738	10.8741796880319	9.05822966528056	8.07373928336974	6.57986865675935
COL4A6	1090.89500812524	-1.23104267803816	0.00135377028150267	0.00907213663084397	1.47238945595052	1.09348769195658	0.696547422904889	0.448640006281722
COL5A2	50354.3312715757	-0.479772024380606	7.14521483664944e-08	1.6957492943967e-06	49.9487565382731	47.9504654483304	38.752890738763	34.7533585998703
COL5A3	1439.96894485014	-0.404315192972971	0.000316945469713628	0.00274751369481047	1.4956276921906	1.57936148146403	1.14223124283794	1.28976488781392
COL6A1	164778.530794627	-0.455832513603805	5.79741049052918e-08	1.39237122500278e-06	265.202255818954	256.641119494758	208.215464198523	190.154022228096
COL6A3	380354.221022581	-0.626759806783321	7.83117342605014e-09	2.22348256019796e-07	267.98121830046	231.154144796361	180.275007819359	158.299878815284
COL7A1	9679.21189416618	-0.890545126279905	4.44047248207759e-25	9.43667682327579e-23	7.500381686414	8.37382637436905	4.42354316020799	4.53753370601867
COL8A1	5501.1102438298	0.91767770921509	6.75026716463413e-28	1.78640089153129e-25	6.89828831379282	7.36171068806337	14.3142577080673	13.87483505155
COLGALT2	689.775162821875	0.857903523146422	5.71753009236588e-10	2.0829630409227e-08	0.515458093115021	0.452450305117844	0.921349387376051	0.920922682750048
COMMD5	512.450319160921	1.0139600026971	1.48891537230755e-11	6.9611756706619e-10	1.15810870828956	1.04491838550905	2.3441558845549	2.32714118493443
COMMD8	960.716771445515	-0.437185147592408	0.000241802574155904	0.00218440924350444	4.32767839661176	4.26934024336738	3.45592015903934	3.19402990791049
COPG2IT1	368.59513857309	0.959420058979644	2.96134570789421e-06	4.77423389642807e-05	0.464478498107453	0.373164838229143	0.961112229738816	0.751180365510347
COPZ2	1297.6529026701	-0.431549161136279	0.000137051183209599	0.00134519236927771	9.78246908140226	8.88312030900183	7.32559664780169	7.18502357432523
COQ3	202.397035994422	-0.67344405306593	0.00179734819866119	0.0114902487850601	1.15282803259935	1.12180116155181	0.800230399978188	0.693861786002322
CORIN	142.491880637719	-1.06946558386883	0.000242175700388521	0.00218440924350444	0.253125147247389	0.165350127239681	0.106520578073867	0.103575681913223
CORO2B	908.885675239052	-1.28318121375562	2.39752998035497e-24	4.80396507206554e-22	1.6387456938204	1.77368192271211	0.692720221587767	0.774406560576276
COX11	936.25770438994	-0.402161530413793	0.000923690966131146	0.00658987257932627	1.88079493223411	1.99387843652239	1.59878086639387	1.46871164461531
COX15	1659.977541876	-0.528065177994308	6.26776099171369e-08	1.50276266102181e-06	1.54674820425209	1.55246330409996	1.12648765256348	1.12412256971181
COX20	1503.58848192832	-0.450314750474989	4.88437268752065e-05	0.000556524868522865	3.5078416259814	3.9688114488546	2.77929348269029	2.94319276792785
CPA4	7872.65094158276	0.628257285528668	3.43862865236289e-13	2.02647922176647e-11	12.2460779266053	13.1653924057226	19.7385081936962	21.3747362184933
CPD	13787.7589034057	-0.325979645860437	0.00175283727835254	0.0112570035101524	10.1522472947169	9.11163146034998	8.5744884954451	7.5215226297408
CPEB4	2364.49455670792	0.329936987232158	0.000664109284060418	0.00505689295235148	1.4330182761937	1.39036899334129	1.91922903222079	1.7981486524798
CPNE2	591.827537311386	-0.488466379498673	0.000328412402808931	0.00282595850417059	1.78849126784673	1.78359109209775	1.3656158923479	1.30078415772486
CPOX	1442.78814859824	-0.351116867863975	0.000545238650984353	0.00432063125350651	3.44300114549766	3.46468615304325	2.79095724295398	2.88006286630716
CPT2	600.238700452341	0.618905770100588	5.71514136854044e-06	8.43795503527876e-05	0.902566886571377	0.866348271894409	1.41516606643984	1.43263172412066
CPXM2	137.468419395264	-1.0849007756509	3.16584891218512e-05	0.000380890184544298	0.316614733225832	0.262955727955288	0.144368549037842	0.142727551561836
CRABP2	185.634025735768	-0.841156648559321	0.000410468901553123	0.00340866596399295	1.27418389718478	1.09080909654421	0.61584017940083	0.770825073071308
CREB5	279.296795490623	0.517103007504189	0.00606488961882153	0.030924066576953	0.140848244695767	0.156806916409285	0.231235958189724	0.213720049718515
CREBRF	2877.10770349736	0.870746670517205	3.4791264749684e-17	3.29717756337208e-15	1.43262078738791	1.26609783944846	2.61719131080602	2.55766779092171
CRISPLD2	928.729479589714	-0.443563162513833	0.00357729816544412	0.0203655366257703	1.51321006210552	1.18087906689409	1.0744569155698	1.00522682343178
CRKL	5508.77252521378	0.365787034723534	1.10993387274747e-05	0.000151291861021924	5.35025981384038	5.10545651443684	6.98191631605382	7.13268560848481
CROCCP3	705.077838364235	-0.357049016002214	0.00552374710150433	0.0286418029004435	0.842756697880772	0.864190725605865	0.718223888285388	0.676760115161076
CRTAP	6809.25017861712	-0.576876437104837	2.75923592008481e-12	1.44406876922051e-10	7.16014864988584	7.01977319387972	5.10857781119106	4.84624651508237
CRY2	1186.06813833146	0.378226797296244	0.000452064757854776	0.00368857492360156	1.36387885081897	1.3679183240438	1.87619085246477	1.84201136145877
CRYBG3	4081.0077085036	-0.49534987559174	3.18145573292553e-09	1.00276624966322e-07	2.50026697144274	2.6388830620128	1.89199210521159	1.92385527535995
CSDC2	1872.57027047211	-0.461190475105902	0.000271295545885676	0.00240987417770266	5.15583941388052	4.75945463570666	4.13133302189696	3.41341450836142
CSNK1G1	2767.26319717539	-0.341551574662044	8.85994867018901e-05	0.000933656198708272	2.14091139755214	2.17628269978996	1.7831557728674	1.78405759156646
CSNK1G3	2630.88836431175	-0.473302290043987	2.55512634533884e-07	5.36500031732373e-06	3.6503045853541	3.82006638091034	2.88176992531747	2.74999806016454
CSPG4	22430.9260433792	-0.32610436733469	0.0043094925038713	0.0234920100502522	15.9842241510248	18.8637861981794	13.254479640652	15.8412314535036
CSRNP2	2149.24597730394	-0.322603970654105	0.000788687894809406	0.00584180358053983	2.99988082879571	2.87507223079441	2.50209719019798	2.41948594762326
CSRP1	16802.9458685745	-0.507695897863769	6.01256199960968e-12	3.00114571553471e-10	49.3434525144109	48.8673713732958	36.503398799621	35.8274236109364
CSRP2	578.888556347197	-0.499411508345824	0.000242575237872984	0.00218660686787049	4.28949503363206	4.20779383057981	3.16952748945002	3.12759849705922
CTAGE1	48.0493941788993	2.08418072132234	5.67469455865393e-06	8.38706700523499e-05	0.0258868314906312	0.0230786683639372	0.115615406327275	0.102837517053762
CTBP2	3997.19274520221	-0.377989989018474	5.58906237564706e-06	8.28670072736001e-05	4.1082449537267	4.27375963627183	3.32762491539667	3.42443838535537
CTDSPL	2157.54490239406	-0.605009383361131	1.29760768772761e-08	3.51356089344932e-07	3.50887300891562	3.24869599250352	2.43316555073999	2.221975774242
CTHRC1	3464.71588881801	-0.557684550427699	3.33189028661118e-06	5.28380182950786e-05	16.6171193010246	15.0865485115008	12.3227645803251	10.238623489722
CTIF	6919.27393250444	0.383597237600458	3.38173574843994e-06	5.3474887945455e-05	5.94432461362053	5.99652006095444	8.40161565383913	7.90786374463243
CTNND1	612.549386141262	-0.46481308268552	0.000898076890779235	0.0064464823285924	0.676269125935214	0.61684858639716	0.475959664338456	0.506828700904058
CTPS2	1242.09025144086	-0.588657824653617	9.55347673871719e-08	2.2075298968245e-06	1.73758165594337	1.76758193292585	1.16637375637751	1.27427540892274
CTSK	16039.6212544097	-0.729419367608146	2.41962945383404e-18	2.65138458745908e-16	66.3558708940962	61.5066966059423	40.8272244673954	39.9506896168047
CTSL	2748.34143867645	-0.322853572289543	0.00095189950206166	0.00675745348053661	10.4272278069614	10.1869744844311	8.18082373987405	9.08404111118355
CTSO	860.211699727114	-0.757433714090204	1.2814205975286e-09	4.38370860998441e-08	1.11185422068852	1.01859311957438	0.665506449063993	0.655882335759866
CTSS	788.628060958033	-0.944409069535478	7.07994230123953e-10	2.52680078160778e-08	1.30096508206132	1.62660265932682	0.738259281258311	0.851305507146384
CTSZ	3864.57500849413	-0.643280821595084	1.28447901607135e-14	8.96323516388893e-13	18.3149380734793	18.0247861722604	12.1894744698432	12.1777626174494
CUBN	151.320741199087	-0.717012909887778	0.00318631290983348	0.0184903702413423	0.0852867173787912	0.0973618226672145	0.0600718988370541	0.0559837410836115
CUL4B	5829.56865433791	0.322186390830868	0.000100770031084638	0.00103773895447367	5.16113363151495	5.07017128757827	6.85266750666844	6.54280789048451
CUTA	3202.99919539027	-0.582658830135766	3.51827751871052e-09	1.09175576277508e-07	9.39904768018931	9.12926708460682	6.09376099434687	6.86709209742436
CWC25	709.567570530688	0.334470576725812	0.0105859725956677	0.0484216387245861	0.583947694932165	0.542508477354474	0.731037545844736	0.75870482195611
CXCL10	290.16527457453	1.15929709030456	0.000245057109056504	0.00220331475104265	0.683846163934479	1.0305134698841	1.34630175065582	2.64667948251708
CXorf38	950.938219479873	-0.422128729155706	0.000797885268352739	0.00589364963075897	1.35933258798291	1.49978854554686	1.05217070253726	1.17982289615213
CYB561	456.799245423627	-0.462286194222195	0.00844492196771944	0.0404675351961848	0.982136675399241	0.809926318356768	0.733906621069648	0.631690341942618
CYB5R1	1692.94251570037	0.403880279197556	5.38602358122634e-05	0.000606295078252654	5.22739981702813	5.03074235009268	7.00730310363064	7.21503405775725
CYBRD1	10968.0446438346	-0.425175449597155	0.000445733105377582	0.00364752189966509	17.7274042022196	15.2966125185146	14.0760774205016	11.6856330397562
CYP1B1	250.168167081835	1.74390470027233	4.799392027933e-17	4.51787064320726e-15	0.133649013117214	0.123981421505302	0.468937988917635	0.437107795017179
CYP2E1	48.168988859482	1.81000268449251	0.000183176211149573	0.00171969848566527	0.0781755394095696	0.0696951787575207	0.206291832659423	0.339323063647206
CYP2G1P	40.3861098566272	1.84896365813849	0.000174745519941624	0.00165271791146407	0.0469563228408204	0.0330494006340067	0.152384103288726	0.153416252011465
CYP2S1	835.168865206404	-1.11996156160355	6.76101615937814e-18	7.23893226346853e-16	2.50449011003379	2.53958068325338	1.12965772525804	1.3008439437353
CYP2U1	1124.93785116062	-0.704957588405295	1.59886387697013e-09	5.36499156420648e-08	1.73293264297502	1.66078871606446	1.13850784189702	1.04257730293867
CYP4V2	774.2638566076	0.689472577531668	7.92945593708816e-08	1.85984195608024e-06	0.757236903631782	0.698615429779514	1.21190460290288	1.25121213301513
CYP51A1	3573.25996155605	-0.358656133623476	0.000320710017393586	0.00277158268882467	7.11724498670755	7.0089727476508	6.11771734341117	5.41762391338385
CYSTM1	539.92923715896	0.38630852163964	0.00636321690975918	0.032046851122543	2.95961710627716	2.99118140190912	3.94399268560678	4.20112554875252
CYTOR	2093.20588182476	-0.357469520888269	0.000373628219744651	0.00316455882254739	14.3864147458997	14.1827649371816	11.1064706303917	12.2522321488603
DAAM1	855.16633083111	0.720339014950293	2.97883361961051e-09	9.47417694980885e-08	0.644021936264627	0.616171106926695	1.08541473510728	1.09112088088502
DAB2	13966.5172842542	0.666493148354377	7.29770683744843e-15	5.24910954369496e-13	13.8207526535006	13.3219368465734	23.4816575312009	21.6323170522449
DAB2IP	3360.25650011168	-0.559316575617985	3.47617356011335e-10	1.29672367963164e-08	3.84052317903582	3.77412309187515	2.6160632699749	2.79654009610669
DAGLB	3059.7794444093	0.329436539721524	0.000206938534512886	0.00191332886293852	5.44646974629278	5.33284447199391	6.92903423471799	7.25916134031501
DANCR	197.553637086063	-0.77072074153188	0.00195578363886682	0.01235212236268	1.6911300160184	1.67915307410695	1.22362099941263	0.844085793212181
DAP	12934.5800031641	-0.369764892006915	1.62575647874217e-06	2.79104778100828e-05	35.2254034008038	36.8268300000751	29.7393368790492	28.6311229135525
DARS2	1062.04824980249	-0.563552450466383	9.70236637330603e-07	1.76964097206749e-05	2.11674160595593	2.26305770841361	1.49587179873933	1.6050447124997
DBI	1193.9366448625	-0.466501333344799	0.000243167901130074	0.00219054141377676	5.52717602952539	5.63456607710244	4.59053148558078	3.86437098141196
DBNDD1	609.220448362509	0.390169278175438	0.00631505241932189	0.0318500270526461	0.990982955376977	1.15884125437286	1.47366419900828	1.46820904434821
DBP	157.578224955942	0.84215453079731	0.000707101785142264	0.00532356931744787	0.346090848091583	0.375755808356888	0.732810017824194	0.619298995758561
DBR1	495.436418185184	-0.467584421468397	0.00146302260344444	0.00967942534447736	1.25958521527493	1.21241296215065	0.96509884278332	0.908189415129619
DCAF1	1728.40357751555	0.44928755930473	6.17496846529578e-06	9.01551768096792e-05	1.43326598848853	1.38288693537728	2.03070246125373	1.99813989955501
DCAF13	1682.33896294444	-0.394083345333711	0.000108312764696423	0.00110406601572095	4.12613375322734	4.24519113154788	3.44418500733951	3.22379062671014
DCAF7	7954.83258159008	0.937428738008339	1.76533224187206e-30	5.75826744755756e-28	5.08044337578534	4.81067355313233	9.88814790091739	9.9566520315761
DCBLD2	16804.8141240988	-0.525530671989712	4.60088280434158e-06	7.03729358927971e-05	17.4395739224862	20.2380518880025	12.3905516521366	15.0082676315448
DCHS1	13579.9080353696	-0.556757819753438	3.32212566917701e-09	1.03777582707966e-07	9.00710207374943	8.37352319391255	6.51052086192575	5.86389559693281
DCTD	3874.32579654793	-0.39149805373652	1.84398801689001e-05	0.00023837581497603	12.9188114233512	11.9806958196077	10.0522782111802	9.8361930599837
DDAH2	1035.38439355736	-0.403177424392045	0.000858422859407108	0.00624816563841459	0.472373951662	0.428260090780658	0.365166727873585	0.348952020290681
DDB2	947.079202775835	-0.594180119430433	1.02214169665449e-06	1.84511704469446e-05	3.63675195846217	3.49371866903511	2.57900638133777	2.36954717726388
DDHD1	3307.4943906753	-0.342165887887093	0.00656746338387897	0.0329430673712902	1.74524908825661	1.54825622377601	1.4953587394609	1.22640121154566
DDHD2	2632.96620502659	-0.398289277514492	1.79090510596168e-05	0.000231941228219931	2.98587837661183	3.0029717352738	2.45357095137812	2.30410537723567
DDIT3	925.840941281812	0.835392606769012	1.01480672475684e-10	4.09013767857455e-09	3.45577724441805	3.0644621877348	5.87551884462584	6.3375425810106
DDIT4	3748.55357828055	0.400987695476086	3.43379040316149e-05	0.000407464840903072	11.1928368248146	10.1270720429724	14.3978007436595	15.1104267497506
DDR2	7285.06148455119	-0.332575418443462	0.00149812417065813	0.00989298004597502	15.4758626877993	13.4687667041563	12.544724176957	11.5383872495078
DDX19A	1599.92043261823	0.513803715824622	3.96426935952237e-07	8.02349812938827e-06	2.32711828920987	2.24134674873452	3.37273681374121	3.46282073069039
DDX23	2175.78201224323	-0.342109674717704	0.000195182774567629	0.00181540689395594	4.24157138235334	4.37415645779639	3.5255104068119	3.58968992636723
DDX24	5046.14523511288	0.373810010716447	2.19011330206373e-05	0.00027939004092313	4.24164934668284	4.38581465731077	5.58859041161658	6.11605938392438
DDX49	1021.067630362	0.440605022534979	0.000478294705281253	0.0038688359494088	2.55526714109319	2.91087456289989	3.68011013405862	4.07421246173858
DDX60	4742.52320051501	0.565918773873475	0.000191114905901858	0.00178111473101625	3.23413113138997	4.05848054711366	4.80681265113819	6.48862709465048
DDX60L	9894.44876049458	0.890121378374834	0.00282045769150727	0.0166989191984301	5.08720382424251	6.04368428314054	8.70191512131965	12.8982463023168
DECR1	1807.20469320164	-0.358957068221133	0.000433489468787046	0.00356187656075402	3.38185852185128	3.28181392110171	2.8154130690386	2.62698040582709
DEDD2	553.325920959646	0.586684136625592	0.000450440797572813	0.00367746369427024	0.99898457909505	1.24516869782383	1.6166186960926	1.90060762839022
DENND4B	2946.35865235098	0.462920286660071	4.67419254098786e-07	9.23383444787263e-06	2.48422332139281	2.55614104827651	3.49893471069003	3.77467954599039
DENND5A	9437.81467737831	0.38537309492244	4.76487857107112e-07	9.38654309520275e-06	9.63337623386703	9.43171328906153	13.0743283681283	13.0057750311395
DENND5B	1881.04679299644	0.523119479234498	8.54855156343848e-07	1.58600508239138e-05	0.933958393950676	0.89236120612423	1.43808434506543	1.31162365787982
DGAT1	683.272417389673	0.359951036285804	0.00855849715968996	0.0408304357693236	0.977293786600005	0.880942831815005	1.21054953079488	1.29213602535584
DGCR2	3765.92113505439	0.468596544270561	2.86085691875184e-07	5.93585490272387e-06	3.95796610186184	4.18260618570497	5.6467961702543	6.14423295933267
DGKD	2598.88426698132	-0.436082274332982	2.20291596262857e-06	3.66525495751225e-05	2.71915483910385	2.68537100411788	2.14425377574106	2.0390995354668
DGKI	409.29731519672	0.414731902929352	0.00934924980560381	0.0438130898006679	0.275569562968079	0.30669900598673	0.396860317934885	0.414217120645491
DGKQ	1567.35839865172	0.337577158067436	0.00125382393328573	0.00848751664491587	1.64129586281842	1.81238129704671	2.27726901575121	2.28639222937842
DHCR7	1097.03649442892	0.445094391143852	0.000996651919392139	0.00701055156539325	2.07243054648834	1.95868109943573	3.13691581103329	2.61289515837047
DHFR	586.869747564201	-0.713648217795358	1.05997974665728e-05	0.000145046594406	0.967998825432545	1.18855583968616	0.633104899704603	0.740720534109576
DIAPH2	2049.50765554038	-0.551064946097408	1.04663767782127e-08	2.87845883708257e-07	2.68048206479452	2.81748138321092	2.00710550942883	1.91990302328441
DIO2	1140.45426889272	-1.0753319312429	3.92152415970859e-11	1.6872177258918e-09	1.39572199539683	1.13468486146161	0.707500606171351	0.551474712805738
DIRC3	579.992011754022	0.729636049879857	4.39785072485611e-07	8.77443161690352e-06	0.624377871759329	0.669250362838635	1.06145310283576	1.18224838688401
DIXDC1	984.163272944411	-0.537818892739143	1.44613644444777e-05	0.000192127049117098	0.889704453222752	0.838596966577183	0.655903536489458	0.591560129870279
DKK1	3117.86939967452	0.924770241203895	8.60388961606912e-20	1.0792675726631e-17	6.65259300405702	7.14470182368718	12.8748542876794	14.5370664578495
DLGAP5	1305.40300324749	-0.492380392502414	0.00175529368451567	0.0112676197798704	2.47702776828132	3.25597679767538	1.91289972224972	2.34644577098775
DLK2	26.6363906877838	1.73174391063197	0.00326218967835567	0.0188604585443597	0.0300714257636517	0.0329023526399963	0.108818717734108	0.109555783465345
DLL4	458.305255184571	-1.94098309301163	3.60808466772466e-26	8.03285643642954e-24	1.20121037618474	1.25936480558021	0.385214018333606	0.28516411932844
DMD	614.751879803552	0.431422570642773	0.00168704105304616	0.0108993264901084	0.185679585082529	0.200229755869395	0.279669869425318	0.264490265299204
DNAH5	7891.86561436892	-0.539307658008749	9.44669449528966e-09	2.62895509902644e-07	3.52684251382949	3.41871239162356	2.64818630917383	2.35610901993609
DNAJB2	2135.25651897754	0.496430013044771	1.75473301449953e-06	2.97964712607389e-05	3.24480962949881	3.31417062880014	4.55676460181264	5.13221500251461
DNAJB5	870.748500382587	0.433218604741801	0.000375321744028861	0.00317315417826932	1.38480017745331	1.48538203649097	2.07254474090598	1.98054065533182
DNAJB6	5258.70902708844	0.473457029860287	6.64158831545198e-09	1.92468838249028e-07	7.95256808049316	8.01774522461804	11.3207317960287	11.8987991639433
DNAJB9	1312.54437691427	0.484918592230785	2.86695297560203e-05	0.000349972867152255	2.57957425281472	2.40328912801864	3.81678470397294	3.49295709568899
DNAJC10	5509.06821489383	-0.507234231006638	9.02645696640067e-08	2.10307450848398e-06	5.59423249322635	5.32493139373509	4.22913673038123	3.81648739367224
DNAJC18	688.878319775852	-0.866517371680251	2.70238530678092e-11	1.20712281251303e-09	1.03265303935146	0.984068252061043	0.571498799134395	0.587794680697282
DNAJC2	838.069042236414	-0.452180452096811	0.000147211219884291	0.00142595619481841	2.48843149189771	2.57740053840405	1.92688960877969	1.94875899340706
DNAJC22	514.042416460907	-0.652785313712675	1.7603568564205e-05	0.000228618196927352	0.856582072002907	0.78999453528187	0.578541339298064	0.519461474851013
DNAJC25	577.188760506101	0.39403459672388	0.0046072878840747	0.0247308916425686	1.14405815335457	1.15903694122892	1.63318328890411	1.53527764627589
DNAJC8	2447.24291230237	-0.368668440753165	7.02628382457836e-05	0.000763366823575028	8.80892546663871	9.28664551100849	7.14443676409694	7.52454996093278
DNAL1	779.35801428714	-0.339288860497148	0.00690495938267133	0.0342706865892951	0.577118094593626	0.598436333781217	0.503000561553568	0.469422732021699
DNASE1	372.279582361111	0.428836188014345	0.00883787247665528	0.0419475517660889	0.592921896798899	0.591999255753065	0.806728822240251	0.864135647463996
DNER	50.7106984460202	1.69116329393017	0.000133693407596657	0.00131869460966998	0.0417250223004214	0.0431167409799463	0.122863839399559	0.163934507474571
DNMT3B	527.88288762566	0.536001870930025	0.000857431307394554	0.00624420120327934	0.494575463624732	0.584314830829136	0.756339167968471	0.87731388011881
DNTTIP1	814.184271096106	0.440680083496681	0.000353424148118451	0.00301895682186931	2.97774929410007	3.22298523573545	4.42673352839831	4.37355546641657
DOCK1	8665.27898391656	-0.324965397881452	0.000328062258888642	0.00282467847954088	8.38938581696105	7.85836507679259	7.0640255673999	6.52117132438727
DOCK11	3015.52613955793	-0.350970156916645	0.000563763488427887	0.00442740576074443	3.01588173184334	2.87416716535985	2.55235948525416	2.28462082404425
DOCK4	2120.34958815275	-0.858963673327588	5.89668499880491e-20	7.89025027207961e-18	1.84472140776137	1.95023537835065	1.09466813857002	1.09506305861883
DOCK9	4743.44448440431	0.439114955396153	6.35843322300328e-08	1.52190075743761e-06	2.86260323583846	2.92780192285649	4.15010948769862	4.06853752226004
DONSON	620.274532869406	-0.382237229689857	0.00624585443041506	0.0316153907448853	1.56002431441613	1.66171521494668	1.21759669565528	1.36892345752797
DPH1	688.414765322613	0.431548654140477	0.0016759143741279	0.0108424238983016	1.49274831490091	1.59924920417367	2.04993681289221	2.31263553739293
DPH2	589.445235483628	0.391169008394759	0.00557138071031781	0.0288354929309659	1.03082337764531	1.16003396225363	1.46544153804331	1.53684111028508
DPM3	137.365360680718	-0.898184561195695	0.000484930687499556	0.00390898725452228	1.82652550670464	1.95709850163927	1.15110598284171	0.971695433302155
DPP4	3259.67408833284	-0.575725512270459	2.17046288661434e-09	7.14622357926122e-08	6.02107050008215	5.54736477677231	4.15920020371929	3.97356458152842
DPY19L2	469.434369880696	0.444727113303937	0.00260176735567901	0.0156144512531584	0.5613687697905	0.572747660777851	0.809438712638316	0.80650767108367
DPY19L3	2530.35105335806	0.611017674826937	1.74529825148483e-08	4.61008536258497e-07	1.92817298223755	1.81286936224223	3.17891357962608	2.8072838661431
DPY19L4	2639.34566799577	0.732833218042474	2.05283877065539e-10	8.02036674017059e-09	1.87642732334963	1.80244560345132	3.47063098475926	2.93251088314015
DPYSL2	14978.4235774497	-0.612879406394723	3.89039112724623e-11	1.6789731061771e-09	21.0247901752661	18.9727685638554	14.1346586367211	13.2610953457769
DPYSL3	12641.3251097622	-0.372523134704046	0.00102845276978001	0.00719814298849023	15.6513760179606	13.6503295359894	12.7760321321984	10.9316239070662
DRP2	1372.3783691417	-0.410360260452452	0.000166638144456894	0.00158889640662978	1.31994271419453	1.22416967184027	0.985303132195382	1.02143479949562
DSEL	12525.039830917	-0.345943786854193	0.000429156012481563	0.00352833659499789	4.41837378302591	4.31879568269923	3.86211832679916	3.33502371847617
DSTN	11092.2826564123	-0.477414011323867	1.72518222611237e-08	4.5655482836702e-07	42.7677959130391	42.781580296272	33.5577416676209	30.7743531890317
DTX3L	11302.5964480583	0.740762835260028	0.00910444212750161	0.0428663663243832	7.62389830832988	9.36644140545982	12.2536261360317	17.469133182082
DTX4	1553.13215942034	-0.792911803720618	2.49788871674087e-09	8.09131342748441e-08	1.9791503682746	1.9123594754731	1.30643767806124	1.04539880130645
DUS1L	1417.77646389485	0.415599103338702	4.93531414286239e-05	0.00056141700054978	3.74183492787319	3.71767866100001	5.17256983872369	5.24901776081056
DUSP16	1452.68165081035	0.365378428360402	0.000890327714817785	0.0064171307954955	1.21025881454049	1.11490833576059	1.52395288048678	1.6169374809887
DUSP22	521.373234270086	0.760119277272239	5.29519705689041e-06	7.92640703521291e-05	0.692270661783021	0.582448304366041	1.21605700845097	1.0517796487961
DUSP3	6359.12331467288	0.351250955076934	0.00018294092692926	0.00171863994715995	7.65092359421934	8.03899249522123	9.82095372132888	11.1343513387044
DUSP5	4066.55294976847	0.339236416140654	8.64540518788846e-05	0.000913105822028039	8.19891886704742	8.23305019145225	10.5166021929179	11.253311619451
DUSP7	1466.49138896431	-0.382125496135443	0.000149788798909646	0.00144692678616164	2.93870964081271	3.00067601594919	2.35957691562423	2.4117581188944
DUSP8	363.116696140921	0.830905443834689	2.2499474132734e-06	3.7302319643703e-05	0.1133008382853	0.111935726533649	0.193826617995117	0.226027468962005
DYNC2H1	3647.94258196511	-0.523646963280011	8.06740067698438e-09	2.28592650293703e-07	1.81698351860638	1.81676142733762	1.37466436827217	1.27184779268303
DYRK1A	4031.43450411156	0.43394455449927	3.13509012746785e-07	6.41938308435972e-06	2.89674763941196	2.84348607352097	3.97375832810986	4.14884703664245
DYSF	28.9088191859312	2.30237259241636	0.000156526379748171	0.00150166826425981	0.00852658528610375	0.00684147114525892	0.0346059341915041	0.045560433904247
E4F1	848.927592267991	0.481336021229821	0.000346163829062294	0.00296054504050472	1.43495386524396	1.66224522409457	2.13947123852097	2.37837202096854
EBLN3P	1874.06666756321	0.336278660484343	0.00278244641766545	0.0165437021848985	2.09786389317571	2.28570032492226	3.07326980919142	2.71512742607949
ECE1	19301.3119367628	-0.579743359737158	8.61586121223995e-16	6.82746154592528e-14	23.3244560665771	23.3150634683791	16.3735114022123	16.3016700754162
ECM1	8683.20657554637	-0.351586240903949	2.40664866891817e-05	0.000301810143601046	25.1647263259903	25.3238817707518	21.4776976315361	19.9489237483606
EDIL3	9670.39431685324	-1.22953484596315	3.91694139445926e-19	4.57825166655713e-17	17.5114021628386	15.4275706120615	8.37437043409284	6.33510063616658
EEF1B2	4800.99119197283	-0.591008035549119	9.50980250565158e-11	3.88876063977461e-09	30.7878448496787	29.3445181615823	21.6997517589154	20.1114692654808
EEF2K	1764.02767749823	-0.363029487924396	0.000166875224979323	0.0015900760227989	1.54722597534083	1.55068884665282	1.26968700629936	1.25262917738034
EFHC1	1023.86948245438	-0.408100095670772	0.00113334766036033	0.00779996775476646	0.971150042445432	0.950413589679223	0.809661723214747	0.706922216942115
EFS	611.071036179678	-0.509488891684151	0.00469027519555028	0.0250612571020146	1.43803976333225	1.22086710420909	1.11617831683867	0.842413195973812
EGFL7	124.516021377256	0.718444143855609	0.00660008704627423	0.0330617217539437	0.207740675097494	0.216431763895032	0.367645955204992	0.362543608461898
EHBP1L1	2437.43487136951	-0.453855563418985	7.0304149113257e-06	0.000101553655557419	3.22621856002171	3.06475322528336	2.51057855876107	2.30071292289998
EHD3	1347.39068839419	-0.636307375443971	2.4990297127876e-05	0.000310739279712402	2.61349007390355	2.23933296010134	1.8339826391286	1.43817332807855
EID1	8126.85276128166	-0.490283688673126	2.93789093585541e-09	9.36519506052453e-08	25.1520197686002	27.4004093077333	19.7399833595264	19.4119439554557
EIF1B	901.75648375629	-0.356204644910356	0.00265540440778581	0.0158758321498737	5.59977182018942	5.95804425583523	4.61422169280478	4.8330256141212
EIF2AK2	9038.01348470382	0.674378810359561	4.80361104333481e-06	7.30753237460022e-05	8.24801418960459	10.3098750026874	13.2195774457544	17.7746700586645
EIF2S1	3813.82267641981	-0.637272251105646	1.47882586914306e-13	9.29362311535288e-12	6.22203823976977	6.67881332084401	4.30856343805783	4.37169945951691
EIF2S3	8935.15712268954	-0.361189228599283	3.88550140137981e-06	6.03522067062604e-05	17.0198780205647	16.5136078854518	13.7842706064819	13.5568634912912
EIF3D	4337.80165826695	-0.342653725381427	0.000544152948857994	0.00431446538195716	15.1718401205199	13.6040845946337	12.2243075750496	11.5540190571084
EIF3I	4327.10423789541	-0.422621142391382	8.84958138225366e-07	1.63225672839853e-05	15.3281788304391	14.5432742213687	11.6456008483702	11.7016108173932
EIF3L	6739.39395818104	-0.375355955194915	0.00164142725968114	0.0106389365731459	22.5166222990407	19.5700200313489	18.4567222962575	15.5314208004967
EIF4E	1715.42282289791	-0.342967905463782	0.000548383789445012	0.00433331325676379	0.910120777129256	0.924822558277146	0.734373231948794	0.780467036114384
EIF5A2	2851.40363153162	0.466229171773074	1.13527705757632e-07	2.56003151279188e-06	2.48136290039643	2.52243447212426	3.65733657562534	3.57995045705234
ELF4	2469.7432075853	-0.670301281596251	8.79805542475788e-14	5.66062043062633e-12	4.05865699129361	4.15712257216433	2.65984328319184	2.74520528779067
ELFN1	62.2199733806153	2.07270876551719	2.72910937914648e-05	0.000335776211858847	0.0281924182551703	0.0465720990067292	0.107431983569043	0.217622441359226
ELMOD1	408.02002627348	0.600380406512577	0.00039827422882015	0.00333106400323878	0.539794200759052	0.663471738023591	0.954140028856561	0.948127379543947
ELMOD2	1496.26452673232	-0.326835242598311	0.00852533630079812	0.0407415219608158	2.16895095406209	2.20031425710223	1.98837256037841	1.65787783042276
ELN	540.807339816868	0.834832015630158	4.98395567083705e-07	9.73606716422849e-06	0.628479057851127	0.491821196876764	1.03192343598877	1.07061691792281
ELOVL1	3784.1519087643	0.330576892434459	0.000303144061201087	0.002639291497459	10.5176365232374	11.2074329518859	13.7087857979407	14.8855670289445
ELOVL2	2183.78211354631	0.56624609851749	2.81250925187657e-07	5.8528567903295e-06	2.53223379763765	2.46740268807515	4.13950964073124	3.61323173029174
ELOVL4	386.584590154066	-0.472941477315518	0.00304177292089546	0.017836081516923	0.839587774930619	0.859702394198074	0.656879873391108	0.624677164928888
ELOVL5	2669.93274265573	-0.372089112974574	0.00066308291902769	0.00505182021851297	4.55447488298357	4.26490383123395	3.80858489764436	3.32946796710696
ELOVL6	1459.40204554027	-0.339363857472614	0.00124292747508873	0.00842188442782341	2.69301739128689	2.86980553583742	2.35606564045217	2.24407852407016
EMC1	6047.30179945243	-0.515114426329259	9.73734954989727e-11	3.95050744834213e-09	6.24285847754456	6.09558567622178	4.48700774968243	4.55541024393609
EMC10	1712.80448549828	-0.827174870865014	2.80577347916638e-17	2.69546430265669e-15	5.70605334776259	5.75767195919104	3.31662536456955	3.44936375982249
EMC3-AS1	277.640177642343	-0.687696031999861	0.00475225391259118	0.0253537897976432	0.335726259401807	0.510825473965609	0.242432896804109	0.305353374549904
EMC7	2282.97014851752	0.390598604447004	8.05445796037922e-05	0.000861134938406288	10.9379716233581	10.7654609172896	14.1993198952495	15.6060329577778
EMD	1528.26337573474	-0.356953020463953	0.000355479513523957	0.00302913466384388	7.45233997321278	7.37524895746594	6.0516617980348	6.07444297444452
EMILIN1	5821.64331598029	-0.346013198166826	6.76562686040606e-05	0.000737816437161292	9.26428237210032	9.91539006542148	8.14107072933852	7.65054283609999
EML2	982.442766064263	0.328271705541504	0.00766076566016799	0.0374241117408432	1.65203621692859	1.59868557148172	2.01460833445028	2.2627068930179
EML4	5232.68598533256	0.640126179227412	1.17860154500384e-13	7.54843163023922e-12	4.38557807425273	4.12025231474351	6.99829541581735	6.8904902013266
EML5	32.0192149650071	1.36876909698289	0.00944343725762262	0.0441365048235304	0.0138460996150636	0.0150443673810609	0.0357977253988437	0.0421602286029859
EMP1	11177.829019449	-1.62049244067224	1.12744457979148e-95	5.27117922538509e-92	34.2173807603174	35.3937971133815	11.5093577376546	12.194244208595
ENC1	1782.04715155656	-0.347692885045458	0.000583845199709045	0.00454692546980514	1.93384829899423	2.09930565980088	1.6184459840782	1.69751310097583
ENO2	4487.5478889151	0.418333825710057	1.66814297011512e-05	0.000217245805931613	9.0690063140373	9.27482120669876	11.9818149968279	13.6890781710243
ENOPH1	1080.76621136414	-0.469368866464972	8.8270023598616e-05	0.000930883722552022	3.09574354493398	3.53764947615333	2.45822536090732	2.55054640841246
ENTPD7	2405.60150092136	0.587238710555966	6.87779443540153e-10	2.46091695793219e-08	1.28973039336533	1.31052598228147	1.9668402417502	2.12380102833008
ENY2	1038.40857114975	-0.350164634396129	0.00189946939909354	0.0120715712694545	2.26247611450959	2.26150851775889	1.8081748205506	1.90890356290373
EPHA4	1361.94465833929	0.542832977615721	5.11416940220809e-05	0.000579881487755624	1.05322666138266	0.870005368044601	1.5429653128858	1.3974155434823
EPHB2	3484.09049368979	-0.373365737238872	0.000117598921294706	0.00118062468960646	2.04737501810003	2.07411230304287	1.56374972816502	1.7682629478564
EPS8	2391.21979642318	0.673686992442869	6.52683886298842e-11	2.7408814937807e-09	2.73188408669615	2.48635855034798	4.21462794016207	4.51315182074244
EPSTI1	1988.8003060643	1.26522062668852	0.00947439834630267	0.0442369877514119	1.6557329386523	2.52135223063266	3.80219215418709	6.70228917302304
ERAP1	6415.06690633661	-0.455071014631448	3.72438892999458e-08	9.34495154420465e-07	5.79695219777885	5.50477816885755	4.33120654239206	4.30466356221554
ERBB3	55.7195295541792	1.24534931603108	0.00380314549307689	0.0213628028377639	0.0370755699233608	0.0241202455975429	0.0656957827070402	0.0881876830837764
ERGIC1	9624.72558426869	-0.38224229625024	4.08853882952427e-07	8.2393456354752e-06	21.2420879260301	21.6823440781186	17.4092143313769	17.0703942764396
ERI2	515.147065698862	-0.425309674660525	0.00665938803765044	0.0333111899486752	0.746566399962081	0.879986259306416	0.597664381994371	0.667796602410223
ERLEC1	3118.03754789308	-0.640430069687724	1.94571027974368e-13	1.1763160510209e-11	8.47929080746957	8.54297310568209	5.81332527001155	5.6204058741195
ERLIN1	2726.647434806	-0.697367816724378	3.5553564650366e-15	2.65252286056401e-13	5.48968020029199	5.60085910360836	3.50978245604468	3.65134057140111
ERMP1	848.865379269045	0.688823404123575	1.87887003102639e-06	3.16362917829245e-05	0.763361026529805	0.641708473725748	1.25599086467669	1.12207088848428
ERN1	878.020963647935	0.785955929426212	3.51026857847045e-10	1.3059688881068e-08	0.886299899411099	0.978024600155297	1.62175610924024	1.7386680641841
ESCO2	280.510319034852	-1.04854600635422	4.62744754905274e-07	9.1802799608223e-06	0.578430037341821	0.726569125302123	0.298571904822431	0.360132220740931
ESPL1	874.351752646688	-0.459980947782472	0.00784508964982173	0.0381272444311849	0.745839713407239	1.02621757282863	0.60918546346393	0.736268524915645
ESR1	17469.7116267897	-0.510087783625851	4.18086586572806e-05	0.000484634914319849	11.0849529893623	9.59517371302359	8.40659717728378	6.80184628441454
ETHE1	816.020942923953	-0.353356393527461	0.00386831693382373	0.0216335778763204	5.56280720620697	5.29414789589931	4.45601980619433	4.45119254570207
EXPH5	473.134136095925	0.496881635007918	0.0108975464917343	0.0495780042468587	0.236344531911478	0.189635620961574	0.357090825168691	0.274217721593827
EXT1	12220.863008685	-0.496559107641024	8.07854258745559e-10	2.86135450332455e-08	25.3192685509748	23.9035281930218	18.4444968175495	18.0979013802441
EXTL2	1645.82291950168	-0.378752296488048	0.0010779450409645	0.00747737742065684	3.38807811026917	2.99019156777191	2.6616266635973	2.48153672951542
EZR	10135.4441736675	0.549962170070175	2.69461594205571e-07	5.62420881001093e-06	14.0136772220969	15.2189628411778	20.3450784826476	24.4623797763574
F2R	10298.2379561031	-0.745114105332583	4.37739191469856e-14	2.86903266334402e-12	19.6008454719784	18.2478870114301	12.5645938218691	11.0836391950853
F2RL2	1593.51587794044	-0.593186086616459	3.18448006817001e-06	5.06411762314654e-05	3.38424123715171	3.07843456488225	2.43799376972987	2.05063688749622
F3	64323.5661319878	-0.633260057235721	2.2222767015606e-17	2.24242108029417e-15	182.678947781139	195.569219192575	128.541991066239	126.72894853412
FAAH	34.8898183349301	2.91404117727688	1.5534523482991e-06	2.67674725273258e-05	0.0148106175924256	0.0316895637200919	0.187266578967387	0.167586665258795
FABP3	61.8832355059088	-1.80116431421218	0.00010988953611846	0.00111527542228475	0.499411376521939	0.327743173217251	0.169630767584991	0.0799394498445298
FADS1	2977.65795033643	-0.687367334636752	2.3407762138411e-05	0.000296048035846124	5.18634990065837	4.42347235296675	3.6644034605336	2.5859869449254
FAHD1	713.216147121728	-0.353989600142563	0.00676200507512606	0.033716275571887	1.61925820706926	1.75712365671817	1.330903367771	1.43232616292134
FAM102B	745.067290074323	-0.679502128566001	2.48808767477987e-07	5.24780717691166e-06	0.950603126378862	1.03811509465636	0.676638734615895	0.621866046065845
FAM104A	2192.08347656673	0.332662943588711	0.000784342784390568	0.00581765832568065	3.58339651267782	3.98170165365612	4.91362453376648	5.05034296667616
FAM109B	727.840672527746	-0.758360474867182	7.37833466228706e-09	2.12066643387783e-07	0.715818879222303	0.661216918826954	0.435101530353567	0.418368173974776
FAM117A	29.6487708440149	1.49839247774934	0.00793286141376276	0.0384792436244994	0.0341691800194587	0.0421789301102876	0.129242052828685	0.0950063940126008
FAM117B	755.894008886599	-0.583944515174771	0.00428697359207685	0.0234394198740323	1.00722205069098	0.807876654867466	0.761804574523165	0.507649431967834
FAM127A	5568.91917053668	-0.457930624711271	1.23896637654653e-06	2.19415939361637e-05	29.3507716219143	30.6511282025929	24.1629462539885	21.5569621002712
FAM127B	746.068602724641	-0.49319004246027	0.000108577522988889	0.00110546845018525	3.82985631075683	4.19219703057237	2.93149073826715	3.02880987806494
FAM160A1	44.4724691581423	2.57099579364522	3.00562585223676e-07	6.18136483921888e-06	0.0176296840091657	0.0145082246489494	0.0973780552052957	0.104431387930638
FAM160A2	1079.69169621742	0.330684757784996	0.00277106867677429	0.0164830403988279	1.55852061064303	1.61126049554896	2.09025033864201	2.08206555063283
FAM162A	638.306801683802	0.612644907265081	2.39468023952713e-05	0.000300965815767092	3.61379069255184	3.34721016793471	5.91854866859888	5.24290227076993
FAM167A	955.372160249871	0.379022364633563	0.000973714293694639	0.00688719953775139	1.15228269389983	1.19624618972085	1.5868881547782	1.60955045226913
FAM168B	6901.30335701566	0.363510816307085	0.000620921729341781	0.00477741658676034	6.14642861720657	5.53941651403092	8.39361565703592	7.35568743161762
FAM171B	1099.30418343989	-0.545136011860239	2.35357509543209e-05	0.000297367983380681	2.15059332943764	2.09393472173884	1.64992355693186	1.39636566988625
FAM172A	1042.59211327578	-0.392365381260272	0.00445897686878703	0.024147339599076	1.54089414404179	1.35733048164866	1.24884306009085	1.0661754759773
FAM173A	241.171375804186	0.508559445112387	0.00958470715154875	0.0446756061900893	1.30645237288975	1.32931193351015	1.89528252626413	2.03086446721732
FAM174A	227.080990688356	0.57462306355024	0.00497001544171245	0.0263352612714238	0.819786811844657	0.734940619855269	1.1938958890333	1.23797004836724
FAM175A	797.279533628252	-0.386021051495362	0.00210451949956457	0.013095825421869	1.80925863267248	1.83997114420091	1.52035834867952	1.40295967422676
FAM177A1	1663.66807047584	-0.654852533133229	2.9443390216374e-11	1.31102536880909e-09	3.3699432466323	3.34029953046439	2.25330434897537	2.21018450411087
FAM180A	1061.83060938311	-0.903406118922249	3.70784823284273e-16	3.09561186391977e-14	4.39322719784206	4.49724352649545	2.46343465132535	2.51261098101007
FAM198B	150.295945650803	1.62627710111425	3.81789567262644e-07	7.73841108443041e-06	0.0969064809092534	0.0680354458259538	0.326177518509247	0.211309785241972
FAM199X	2877.98146133091	-0.34864772205586	0.000171620578676119	0.00162535464990631	2.37498122293084	2.53404724939364	2.07159818644254	1.96245512452827
FAM200B	1256.68921430318	0.562674298032432	4.97716586814315e-07	9.73606716422849e-06	1.3713280865036	1.3039469555184	2.13180264388356	2.00946082964948
FAM20B	3186.25781830667	-0.429582630561597	3.80786845479599e-06	5.92776503295988e-05	3.50491936198028	3.4613236450636	2.81374399091016	2.60235619524344
FAM210B	1363.82574936487	-0.464045669111042	0.000123558795172437	0.00123084919111407	3.17341287311969	2.85379122738696	2.40977289222439	2.17046280735148
FAM212B	1155.04752908868	0.81309574685126	4.13811492268295e-09	1.27004813797705e-07	0.885354201851771	0.706011226935317	1.46891066509078	1.46842863026902
FAM222B	2097.96050078819	0.418933622916593	6.73736294292744e-05	0.000735999029064942	2.01680377679714	2.28184349471465	3.08413879494983	2.92457411286703
FAM234B	1154.57535559067	0.509546434721662	9.42198204810114e-06	0.000130585691903821	1.10255317799117	1.24013754350162	1.73136354176425	1.7544766327054
FAM35A	1540.73345240678	0.406024926292633	0.000133787636963977	0.00131869669434767	2.06346299305531	2.12682645361987	2.77244045318874	3.04036374242028
FAM46A	3322.22699403435	0.367686047020078	0.000320518496517972	0.00277158268882467	2.99335196431034	2.98706042202105	3.75345341836188	4.32889499049399
FAM46C	2609.9104997006	-2.36734763317276	9.05458625127496e-48	1.05833022300319e-44	4.97753786055705	3.85773693415565	1.02119943110945	0.773218521249703
FAM60A	878.501312705216	0.324584701012223	0.00682199400394189	0.0339550347406987	0.729498001940736	0.699447210642254	0.948441973958539	0.927054456371923
FAM63B	6017.69058255877	-1.36959410429046	3.78085391140209e-38	2.20959404005524e-35	5.41858764381466	5.30695014720659	2.35680073091804	1.98876607366714
FAM64A	402.537975097076	-0.571345980687462	0.00143515321425452	0.00952648319126073	1.59160421852696	2.02092803866506	1.20460098387772	1.3327728742862
FAM65B	747.722883722567	-1.55940069583174	2.58578295051496e-24	5.10819600900322e-22	0.740817879627256	0.805053749862494	0.305905249853158	0.242648741537654
FAM65C	4951.14754410918	-0.537892095681254	7.54764401379532e-11	3.13204896264773e-09	6.9984520632238	6.84389079209458	5.06392845322395	4.92108884660269
FAM83G	638.082791178315	0.583288681491775	0.000210507554885567	0.00194376495380182	0.919198486932498	1.10177339596875	1.44809072200113	1.71419646202451
FAM86FP	301.688372391464	0.483855548814841	0.0085400580791784	0.0407897424405685	0.72394409370349	0.631212708058539	0.980904763683753	1.01030334091892
FAM8A1	1722.92943787945	-0.333669564244501	0.00242591267539847	0.0147489602016207	2.38155667279307	2.30160065773361	2.0578494363146	1.83439557351351
FAM91A1	3921.40221335808	-0.446150473653894	2.18904369485906e-07	4.65910878059076e-06	4.34310463283977	4.61370481141304	3.49172905757981	3.38854901692963
FAM92A	919.270943873856	-0.922120174596947	1.43136129210058e-11	6.71447273679021e-10	3.36951816367418	3.06024315635899	1.91143660817827	1.64496474194867
FAM96A	708.47937806834	-0.503492502746595	6.68007252149784e-05	0.000731418401143862	1.3032537680595	1.31162875789844	0.975024440727103	0.956424631015306
FAM98B	1638.00915398855	-0.322993971411031	0.00309123098118056	0.018031428642112	2.2528711241029	2.55126535310382	2.05307876211839	1.96252442432813
FAN1	752.949919886367	0.338499884810445	0.00735246489952412	0.0361084288097778	0.313071139467497	0.339857069112528	0.43079797176695	0.432475541527901
FANCC	768.87237690011	-0.463402542044365	0.000244323645581954	0.00219812921932808	0.864198775437991	0.902651140286299	0.69358784239288	0.647334273963711
FANCI	1457.83764097715	-0.49308143671804	0.00049860217156647	0.00399394292312468	1.8594731946631	2.29791459600901	1.40134106349873	1.68704390014073
FAP	4038.73437447858	-0.42257469707962	0.000122991175421997	0.00122693757216851	10.0680303108194	9.13274515238491	8.02845729618801	6.97840408411291
FAT1	100994.188833836	-0.335450847815182	0.00248537982080301	0.0150193612092128	46.7676589121693	41.4946466770438	39.7046256098918	33.5508643213579
FBL	1842.18025425617	-0.325707781298038	0.000931222456675798	0.00663685273238554	10.419097851089	9.9228286415316	8.45221894569236	8.55551104241661
FBLIM1	3685.15448662789	-0.431983161098712	3.13465622200778e-06	4.99771375780468e-05	6.62999475134197	6.3455506175959	5.217064178077	4.8569201175352
FBLN1	10033.5875024737	-0.659041641662863	9.20443418757677e-09	2.57687413003896e-07	15.5799219922449	13.6705651015219	10.4977398151945	8.90525800440184
FBXL15	169.583763018749	0.862243502609984	0.00086239258589856	0.00626731523824518	0.241710282367833	0.351342273463128	0.533154083500776	0.586312882771649
FBXL5	4179.88784403899	0.456992782982771	5.51905314968759e-06	8.21764750292124e-05	5.71689432629164	5.46566706862727	8.52530396510358	7.55131647745159
FBXO10	974.897075401911	0.657148319614489	9.21283170662696e-08	2.1393903562442e-06	0.946785320724801	0.966821748212701	1.48851600083374	1.6712674314163
FBXO28	2467.30203270156	1.33965416109281	3.75747920735836e-39	2.77381070328465e-36	1.5585274569453	1.40367006939306	3.97804963435748	3.88512178887587
FBXO31	1389.42600830339	0.38784750692028	0.000415806710184453	0.00344076986256469	1.15841486805273	1.1210792880038	1.49183283179166	1.63368642169582
FBXO32	908.014270854125	0.571643934834355	6.45887527366099e-05	0.00070941413146726	0.653085121187221	0.561530537665356	0.874423946996033	1.02075288864249
FBXO41	258.693290463166	0.770696876193223	5.80328608872377e-05	0.000644917266344404	0.157649275943394	0.16170974413855	0.276851315903478	0.293507474840546
FBXW2	5397.58085710328	-0.475866383422516	3.37914333245225e-09	1.05324143068834e-07	3.91213934619765	3.9975797309989	3.02231012328613	2.93183545296882
FEM1A	1036.97902840936	-0.511181335381186	4.33711986250241e-05	0.000500678544785669	1.69670573843883	1.97536800644307	1.37845701600931	1.31421786482178
FEM1B	3289.61268267036	-0.815057504983795	6.07306683057556e-19	6.86942220690748e-17	3.27360607041523	3.54343729037691	2.07219093767538	1.98215489262774
FEN1	913.853031995078	-0.490347349113808	0.0051600810440328	0.027127172685009	2.35349364907014	3.03875840424029	1.72077259298756	2.29148140491569
FENDRR	9039.51682908412	-0.492256000428897	5.96888453266448e-06	8.76644758692691e-05	11.5371996918164	10.4173640560374	8.79940170136955	7.54749909900253
FER1L4	852.54611989783	0.723168882565193	7.28563281100255e-08	1.7174501816323e-06	0.571876818429223	0.534961894916361	1.01816610131762	0.897292654530024
FEZ1	1056.10713630931	-0.731824350250874	1.95416898520054e-09	6.46442787415632e-08	2.63294764757408	2.39569991316371	1.64113305300359	1.53319697717323
FGD1	1193.24456879302	-0.331702352042666	0.00264161713440508	0.0158068779552754	1.84790430076517	1.74903690146862	1.51139853075597	1.4839940769852
FGD5-AS1	4112.46190389949	-0.504005407186458	6.57541343823963e-09	1.90945649864905e-07	6.15888320615427	6.58931161080502	4.78930214383407	4.61795907942936
FGF1	3687.71007747669	-0.533463391231011	1.56148687219818e-09	5.25213785838169e-08	4.88104045784289	5.1039905614263	3.48482863181714	3.73705462919094
FGFRL1	1150.01479868801	0.553490288623212	1.90955873162897e-06	3.21144733451174e-05	1.66212464771493	1.66897022829119	2.67836410964522	2.44041286179686
FHL1	2882.02556904533	-0.493360675322946	0.000497168169507958	0.00398701014609412	5.0806218003731	4.33691059397351	3.93380693550592	3.07524377648225
FHL3	1088.27663091796	-0.336935863512342	0.0078727142477471	0.0382350034760737	4.32185798551308	4.15686465560364	3.77658523103768	3.25479476355525
FICD	344.912575948716	0.506919235226911	0.00250282750690056	0.0150922865914821	0.977267523027766	1.02037372097966	1.49030762748974	1.47972715124087
FILIP1L	5486.7930802944	0.363215254895497	0.000646539249649606	0.00494253246828129	6.26113065563603	6.14890599348345	9.0504376930926	7.66214445168299
FKBP3	1597.11107141057	-0.618008833737006	1.51720485993212e-09	5.12778683503807e-08	7.97013539288903	8.6498746227732	5.64176033368751	5.68721411882044
FKBP7	539.122457569934	-0.980822067223103	1.68186150959546e-09	5.63002136839759e-08	1.55568605559668	1.29167163692768	0.793906990263992	0.720363451439911
FKBP9	11175.9562454563	-0.711929034225545	1.82335845994361e-13	1.11678715105542e-11	22.9502583977668	20.0507552168484	13.8127996403975	13.6933792863374
FKBP9P1	212.914106967394	-0.958086626340543	3.80031205402255e-06	5.92257520774671e-05	0.543721570320831	0.507098335062601	0.285003867332746	0.282204608099716
FLJ23867	4633.71496950239	0.589749075749742	3.68312991899323e-06	5.76557815220971e-05	8.61159433680117	7.13150821102012	13.4105737908134	11.422334894906
FLNC	69740.8032052367	0.37561397025888	4.56967125405563e-06	6.99718438967077e-05	37.4396610206257	39.4410961260906	49.733594356963	54.7018271953258
FMN2	4779.18094934511	0.758671113687147	4.87980830740893e-16	3.97931344882079e-14	3.27383861584024	3.101223681039	5.88273542183199	5.41609940621856
FMNL3	3911.72724318065	-0.443362642241679	2.62185154812095e-07	5.49687441165089e-06	2.27000769026095	2.39129038687607	1.82842982576559	1.75933929653367
FN1	309093.93874049	-0.364765312440307	0.00195478563281275	0.01235212236268	242.332896194736	205.049886939234	196.896102856391	167.009564394345
FNIP1	6150.98550755681	0.351528313488186	0.000117030917216768	0.00117584215249455	4.4790361834874	4.82907800868436	5.90718163565446	6.52399159546537
FNIP2	3485.65407159804	0.84981365622109	4.00354000803514e-21	5.84933876590634e-19	1.87872053622746	2.01326862766081	3.56765425759049	3.772398711382
FOS	3015.17808347536	-0.451304983456928	0.00229965759621131	0.0140851517224715	10.5478775221771	8.10258126960725	6.46398489031696	7.84547542236916
FOXK2	2458.61747508892	-0.355487101319055	8.90584999093405e-05	0.000935722104489789	3.00140177171626	3.06746108911862	2.42727269944773	2.53916374895757
FRMD5	316.20733718373	1.11024969954019	3.15613673960417e-08	8.06338322580839e-07	0.193993510810356	0.206392650757283	0.397351018987442	0.507001118685807
FRMD6	26191.0292109616	0.419412338170743	7.16393951438128e-09	2.06751884009695e-07	24.601636378657	24.5016106890179	34.728260421382	34.0334789089899
FRMPD3	57.3798956694257	1.36500010638794	0.00354094769313106	0.0201973698023002	0.0152932198633726	0.036357960566042	0.0610079382009081	0.075441214098897
FRMPD4	1586.79352825489	0.941890622870585	1.2319477333207e-15	9.5465739820752e-14	0.78294540905726	0.69997342143274	1.56376667740942	1.42400821275326
FSCN1	7908.69028312367	-0.449900094957709	1.72125060349816e-07	3.71991694370804e-06	17.8911783779883	19.9127355097019	14.506247223157	14.4545163730326
FTL	58931.2465136524	0.410356572408228	7.66132591979943e-09	2.19301545614504e-07	334.513680204187	337.693436928947	473.044772192798	462.319758382775
FUCA1	33.8009082374537	2.87829578150396	1.65587090668146e-06	2.83927204610198e-05	0.0175797415615476	0.0274272575516494	0.171512032200484	0.168069107723178
FUCA2	3726.82245045705	-0.422629715152897	6.02525123892561e-06	8.83079338376902e-05	9.28168267941267	10.1095678043618	7.27095239177075	7.86945529175946
FUT10	759.042264208823	-0.550575972266088	1.13057413223803e-05	0.00015380633151087	1.50461176860858	1.43653920566908	1.06100911652621	1.04344984165545
FUT8	2068.25383026955	-0.330522193333825	0.000951998294420386	0.00675745348053661	2.43569792507166	2.27916994916952	2.003911255969	1.92515301164252
FZD2	5464.99728757799	0.58543866373331	7.27806412662997e-12	3.58182903298639e-10	6.4022666034647	6.84496443374629	10.6420022865582	10.1586525375092
FZD6	9096.42694910261	0.338406712872448	0.000195976642872499	0.00182158276536095	12.053127628629	11.5755639162487	16.4220873864407	14.8632498369971
G2E3	2008.19948470607	-0.373028228552286	0.000167048367491716	0.00159064521550496	2.17978493549797	2.34143041454479	1.76726802034407	1.88597581049959
G3BP1	7483.51064414696	-0.421961776745005	1.30413617637143e-06	2.29796658414392e-05	16.6841110879319	18.3039856202793	13.2252316999273	14.1077479453668
GABARAPL1	3351.54375137674	0.391523718505039	0.000362600078333479	0.00307858880066911	9.58601556305125	8.36537861140475	12.8805444317522	11.8029077689841
GABBR2	2733.26447754937	-0.369492178249579	0.000241961952846383	0.00218440924350444	2.87338263767908	3.29051949303073	2.49957392376703	2.49038732518421
GABRB1	41.4374397626462	-3.47542211999358	1.77177038223918e-10	7.02001451448779e-09	0.176823099315811	0.221448921507348	0.0175251010016885	0.0198492799478276
GADD45A	2247.69127046173	0.525503301838193	6.92742477387696e-08	1.64964448010863e-06	7.96391592307377	7.4748476032641	11.7998886172222	11.4911221337385
GAL3ST4	568.514858698466	-0.775980360647459	1.37715379955039e-07	3.05149434320596e-06	1.73709302218185	1.52905264000991	0.978234406272549	1.02325643023433
GALNT1	4469.75378104961	-0.732426481297124	3.42418127275799e-19	4.07013275692403e-17	8.26234112062701	8.56249864951233	5.33946003353428	5.26127800160971
GALNT2	12808.4882283952	-0.452992375387016	2.31375952160682e-09	7.60018525762466e-08	16.4939612077331	16.401338953565	12.7879186716291	12.3743535124205
GALNT7	2436.54923677341	-0.420006082790006	3.09520181486606e-06	4.95020531987587e-05	3.67555375328496	3.81698017481156	2.94073646369363	2.92102870130766
GAN	556.403496106394	0.393637995057129	0.00456396142982743	0.0245829965494468	0.609093167246245	0.615462899698523	0.852728836151701	0.831676384551088
GANC	1163.62062241719	-0.382413154600939	0.000425665346136998	0.00350992483534246	1.10926660485963	1.14570750188706	0.885848733297765	0.925040671314282
GAS6-AS2	778.541839541773	-0.57792397742292	1.61743904331346e-05	0.000211822595905832	2.88872630751215	2.66225175231773	2.05013224862968	1.84807494347065
GAS7	3399.69211358986	-0.88036280304658	2.53811633024299e-10	9.7533204515036e-09	3.19511208703293	2.54215609884208	1.77402183586635	1.49266838653479
GATA3	118.703181802835	0.765720163746168	0.00518886803385119	0.027207126371139	0.17383902095292	0.156783342330145	0.285561388231544	0.304967699211444
GATA6	932.414962619988	0.473330646215285	6.28121230372002e-05	0.000691524990360887	1.21943627866788	1.17140082046428	1.76500416052281	1.71368078563696
GBAP1	222.077212452574	0.714495854828495	0.000460097934417839	0.00374540547193535	0.239147485783636	0.238328037900415	0.400652780807104	0.420123603490728
GBE1	10274.7487572217	0.510743116038058	6.18607299659947e-12	3.07680354079093e-10	15.7273847851602	15.911875487009	23.6001441816906	23.5994979008918
GBP1	6834.08959845155	0.446457029484929	0.000147855765012893	0.00143053399683077	10.7083047485128	11.2399830446529	13.8508213647993	17.4699673690235
GBP4	376.545019583918	-0.664024487033302	0.00810410684910287	0.0391824207740493	0.407987323608695	0.461864432664944	0.20808526352908	0.366615716113676
GBX2	620.745056927884	0.530263647336479	0.000146848258908147	0.00142358592780245	1.52727911425181	1.74272794483181	2.48632989186205	2.44628039765902
GCAT	280.877879675136	0.623276830806002	0.00303149096975041	0.0177906662517654	0.63073807182956	0.770917904297182	1.24395896228994	1.00723706804108
GCHFR	26.8410172110516	1.97627755097973	0.001142864789478	0.00785390570172384	0.104442896570429	0.0698348204701184	0.346449494048282	0.38299181019483
GCLM	1413.27087058258	-0.349942597054712	0.00577392746035412	0.0297084029930033	1.8285159151653	1.79942206467782	1.62856685986181	1.35184733004413
GDAP1	72.5671017258046	2.84806316433481	4.94202350185236e-12	2.51147904481816e-10	0.0287224679563059	0.0234728077889406	0.188060804368884	0.209396548101369
GDF11	770.314841067904	-0.556638029206142	8.59880557228934e-05	0.000909553898619384	1.15645381396826	1.07643755980346	0.859774757299436	0.731086583627631
GDF15	1065.89791193827	1.73136055652962	1.05466775033566e-26	2.42504424036196e-24	1.96061240663476	2.12361416062421	6.04485391864942	8.14576708469381
GDF5	401.091520331137	1.20426392005282	1.81356206778365e-10	7.16535818668549e-09	0.524522223426693	0.560506865055901	1.46370526246797	1.14991247979756
GET4	905.11233376346	0.433908885481357	0.000314629883858014	0.0027291272424196	2.12799067059293	2.13826773015762	2.89960475894496	3.13643656590681
GFPT2	316.558574902102	-0.55049855038606	0.00208050116483959	0.0129636203189871	0.740344130805855	0.665398873521297	0.518331209269994	0.488734237491128
GGCT	243.516796919224	-1.28676276597929	4.38243040492656e-11	1.87975439937309e-09	1.51163239299102	1.50202796365594	0.650183229640133	0.643554771561354
GGH	1191.03472837483	-0.63109498863156	2.26110844208511e-05	0.000286747802971842	5.00777554997083	6.22959050878215	3.41512183538032	4.17035322928875
GHITM	4596.57396342411	0.429276590792328	1.76695133869131e-07	3.81280915022836e-06	9.34774941488521	9.15602268551895	12.9087477031576	13.1893237492773
GJA3	586.504399468662	-1.40207083856599	2.97580687549154e-17	2.83936511807104e-15	0.974066291276061	0.916763705483087	0.421538022011868	0.327897647296967
GJB2	120.05852474696	-1.27443863399672	2.48520619026616e-06	4.08167471014908e-05	0.412468078705008	0.430593157977311	0.172388714629227	0.192375725783663
GJD3	134.470767243763	-0.734826950840034	0.00443251722056885	0.0240225991250768	0.256457150407027	0.223845283447834	0.145029318116887	0.158078728955119
GK5	5737.23427467953	-0.616461381650662	9.57050574912779e-08	2.20782752692872e-06	3.3721904586499	3.99052173308556	2.31219454229287	2.71322691690267
GLCCI1	1502.54623228809	0.738957847456526	3.28527243748008e-10	1.23868901097031e-08	1.45139417328285	1.26220646357524	2.42427623505751	2.32776739743404
GLDN	25.449249661261	2.58479089931688	0.000112773269249876	0.00114131110174115	0.0096680019804889	0.00646442414738	0.0575371932132116	0.0455818323553619
GLG1	19623.574489472	-0.364011113635368	6.45234024671297e-05	0.000709251757840095	14.243140886025	12.8191155852748	11.2845641945151	10.7415141871513
GLIPR1	10921.4864060999	-0.537953176840641	3.56309385206828e-08	8.97234369283836e-07	17.6766483683076	20.6479924332517	13.3565054339307	14.2644756356952
GLIPR2	1062.55158693346	-0.787517262853033	1.21306183547519e-09	4.17019737852329e-08	2.82984544387152	2.62370538320279	1.77578015410143	1.53484864478922
GLIS3	3574.2515150528	0.330476805300163	0.000805575418238315	0.00594371426418233	2.27947932848058	2.43928703124392	3.26828664811892	2.94009824397295
GLO1	3906.8536650896	-0.488881680989985	1.15837613658838e-07	2.60374738650458e-06	12.2293137075193	13.5837543342218	9.7698551469272	9.47376251273331
GLRB	567.130109720238	0.534678416118259	0.000646317953021595	0.00494253246828129	0.801289433745775	0.86756836083724	1.37438450774101	1.15307806309658
GLT8D1	1953.44798150424	-0.470498717922885	1.25417082694067e-06	2.21549118623046e-05	5.16414128514637	5.03274192822446	3.93087453765918	3.77752721149555
GLT8D2	1364.26681094344	-0.633453857056365	3.55621404063646e-09	1.1010917910368e-07	4.37771330831754	4.10714300513214	2.85554410402142	2.87704236693886
GLTSCR2	1691.49127858386	-0.377202692411653	0.0049059264895112	0.0260547235675442	7.80394990021496	6.71202709495011	6.3678338229124	5.3472769048763
GLUD1	6858.97974446043	-0.324360284134674	9.05970359582548e-05	0.000949002260157194	10.9284644740825	10.7381812392632	9.31588662822296	8.80417606843712
GLYCTK	307.344171270556	-0.612512322579907	0.0015466053665903	0.0101605090734405	0.569939847673154	0.561254488498464	0.341594195669359	0.433734625498557
GMPR	517.952489598367	0.698785793017026	0.00216061523489786	0.013397342743005	1.39268685294848	1.62687474340734	1.94379397486451	3.18327859384201
GNAI3	6116.17019900918	-0.458848216123781	3.90907294970159e-09	1.20238283316918e-07	8.5635854767768	8.7494160495571	6.62142860043348	6.56631966165891
GNB1L	222.4459805043	0.693647433392598	0.000661194377205984	0.00504299575481491	0.629144115055202	0.6665187287046	1.07775044687129	1.11394228759655
GNB3	292.957323120772	-0.552224689603717	0.00193753470151041	0.0122848339591384	1.14069150823698	1.18964087618576	0.81471586051932	0.848420947164978
GNB4	5376.7891425743	-1.90770358281484	9.57810035305817e-120	1.34342435551994e-115	7.43171814575298	7.8533010996621	2.12788478610779	2.13622883268419
GNE	1412.57862154993	-0.411930960588076	0.000218190125270928	0.00199922089493003	1.75960791340414	1.64549809861789	1.39105809177185	1.29097030103134
GNG11	4360.82119427067	-0.33137738372694	0.00273354368839023	0.0163013111281298	26.5398815373201	32.4467167526337	24.0245712821433	25.005126946547
GNG2	1078.68325412737	-0.935651741920052	3.69550238487493e-15	2.74249293387597e-13	2.07440498039706	2.14408114184145	1.21648373504824	1.09171039713052
GNPDA1	1466.9301510221	0.396196607890611	0.000167205976026844	0.00159106582072762	3.20683721873994	3.17207773195333	4.23832589315487	4.55574820258947
GNPNAT1	2801.62213966202	-0.919289258110092	7.82955542679822e-24	1.48401816778746e-21	5.24194058628536	5.55641365399531	2.9088126280695	3.06755428068122
GNPTAB	3981.22373852628	-0.491975036100329	4.19014670671307e-09	1.28320955695104e-07	4.75619439570898	4.80676294349701	3.61670925655282	3.50262579848099
GOLM1	437.861615907032	-0.636431157995306	0.000101826871320688	0.00104478690354351	0.901464148808235	0.989333757336329	0.584841837879441	0.687435170897182
GOLPH3L	1580.4967850121	0.374616473058855	0.000167781319784546	0.00159238453012719	2.4814767082671	2.54116747673362	3.43214885734807	3.38465798662139
GOPC	2642.96133395105	0.416714549496888	8.85566542018279e-06	0.000123821545106112	2.91841187079932	2.73873390323687	3.96314895233359	3.95099910211707
GOT1	1520.21956199084	0.471165989942825	4.33555653360092e-06	6.66781973029458e-05	3.53608195144631	3.39049093079643	5.02339470394345	5.03907924600605
GPAM	609.019539546586	-0.581328535619303	2.14186138811077e-05	0.000274353861457914	0.68109594310782	0.640560719916259	0.451968979872809	0.474117159787167
GPATCH8	3607.89279954272	0.383534599432766	4.72825801218041e-06	7.21638159726251e-05	2.38551146106106	2.4588754071701	3.30930390741221	3.30629094262044
GPBP1L1	4382.18013070404	0.437706898914806	7.15763338872873e-08	1.69582712686333e-06	5.75076707959549	5.77001952739925	8.11914651685791	8.22110304658476
GPC6	454.55552576643	-0.471976138188152	0.0040403747271024	0.0223639683987128	0.447379917047011	0.412481369785592	0.350543352819152	0.299362096320067
GPCPD1	1110.99391476512	0.333951466938322	0.00229797095450483	0.0140809701214001	1.02423329233832	1.05957080709686	1.3663655753043	1.38276650850325
GPR1	160.490323155637	2.29287572178496	1.41322725143457e-14	9.81283437060459e-13	0.110062449904769	0.128395050742325	0.500799600860232	0.717645098792967
GPR137B	431.585341480273	-0.785093895911659	9.78447265781931e-06	0.000134810425833569	1.66841389588798	1.42240282797242	1.02467772232889	0.85729383552662
GPR161	2452.83597272539	-0.526287678256889	7.54416598147563e-09	2.16389513407315e-07	1.86817661744009	1.81394442489365	1.33349350989681	1.34467031916602
GPR173	745.456494095632	-0.784826691764288	1.15713002369152e-09	3.98769182120327e-08	1.28463206743805	1.2825803001585	0.813516548950823	0.746759701899817
GPR180	2509.08459000143	-0.835878556791538	7.74476616954414e-18	8.167525586017e-16	1.99279988709803	2.20207877133677	1.24757639644339	1.21097232618569
GPR37	2219.98963458214	0.817431455210011	1.23868232627805e-16	1.09268920178465e-14	2.43346017346122	2.44066748311962	4.66575667780619	4.32796162715288
GPRC5A	4397.82327488118	1.2085689123299	2.6736475074688e-34	1.25001933132525e-31	5.20220994852013	5.58292361608693	12.2251225829893	13.8626670292475
GRAMD1A	1811.06556840864	-0.527053449924152	2.27482727704863e-07	4.83435263452789e-06	4.11299823685472	4.12172673528796	3.11022340001334	2.87318988006454
GRAMD3	1692.0082551241	0.500140689074483	1.30954021806751e-06	2.30170565145549e-05	2.31917590597024	2.29182083865822	3.53481810564582	3.29525145127041
GREM1	44968.0734434084	-0.440158350885648	3.58133584628006e-10	1.32537774617214e-08	35.6787312509051	36.7064254347126	27.8220319581336	28.0358159802619
GRHPR	1693.76977220029	-0.338906840774332	0.00069947749673264	0.00527749939170092	8.94919875429479	8.76907641413344	7.49075675922476	7.18218738080905
GRINA	6948.88194285184	0.379606200679944	3.85251228776522e-05	0.000451063940619981	17.1380594876093	18.3811244471589	22.8368061713929	25.5361860650209
GRK5	3672.89398272411	-0.499051792629433	2.93668036873919e-08	7.54393385566591e-07	10.012006442084	9.43742431124711	7.3144799398854	7.10286074955582
GRPR	1019.29368154102	-0.369204377942744	0.00105535646775124	0.00734611901572151	2.51142443744146	2.44534746526194	2.0035215465796	2.01709207106773
GSG1	47.6559333093624	1.16879271198353	0.00781467585184253	0.0379925973996337	0.0480733990361082	0.0670828251871936	0.143559441381632	0.124822933472294
GSN	14280.6678824117	-0.368309183357681	9.85211126605201e-05	0.00101756783959975	28.1329871081434	25.3011608030419	22.4667190917611	20.8940560775956
GSTA4	374.716452626295	-0.860187045369408	1.13893304157021e-05	0.000154643512498197	2.17961265566562	1.98649078616175	1.37611738981296	1.02907883867719
GSTM5	175.512728771193	-0.92775060474825	0.00039463997530021	0.00330460913048403	0.936776279478112	0.755869263302846	0.539880549767383	0.394452813978072
GSTP1	4873.57582663428	-0.336803873741454	6.12758052222677e-05	0.000676203339140462	33.5221632474908	32.1553143016983	27.4835750050744	26.9876584004358
GTDC1	693.541515050003	-0.706540634858216	1.04037740997639e-06	1.8732135497213e-05	1.03586075874577	1.14527575783032	0.753315410828605	0.644121091704565
GTPBP1	3374.06674322437	0.34116580420881	0.00439347038567806	0.0238570714787149	3.18705005251013	3.64209044298117	4.09974858333021	4.95263459759989
GTPBP2	4840.78331715277	0.406119508094866	8.90375558673365e-05	0.000935722104489789	7.97468892400415	7.55473808488842	9.96502052757169	11.5971493062908
GULP1	1190.43155485384	-0.957290452368869	1.97209815153181e-13	1.18715230357876e-11	2.20233637983819	2.10367538833049	1.26566696698504	1.05705292420574
GVINP1	86.436413691148	-1.02846777413463	0.00207886707327725	0.0129591953643497	0.0831303991565696	0.0703118998100219	0.0454736641545702	0.0334987847986008
GXYLT1	2137.40475509923	-0.627776885171663	2.10337595337917e-10	8.18803024327855e-09	1.9052866619991	2.10681587245959	1.36288115066011	1.35322713453431
GYPC	2164.10039789015	-0.338234179490462	0.000221270117970169	0.00202448445834938	6.73704685178125	6.78911916214109	5.57928059914006	5.62414830875225
H2AFJ	509.394996372503	-0.413948130996378	0.00802842934494153	0.0388835462680075	0.864763163920547	0.9731232437021	0.668342212546191	0.773932464788791
HACD2	1776.78417109505	-0.327493029857795	0.00220843317257534	0.0136335755627384	2.54054094839105	2.33993354182326	2.10177909748807	1.97446175403617
HACE1	1045.46828845933	0.525322418789598	4.17818673980408e-05	0.000484634914319849	1.05206022057205	0.951925035615188	1.59620901412858	1.42846282133676
HAPLN1	31.8759668382092	1.88675920839683	0.000619595122333002	0.00477234551666265	0.0159187227992124	0.0177398557058552	0.0704057258818369	0.0594163033581509
HAPLN3	405.359647932445	1.02877288175692	2.45546697872278e-10	9.48770794588587e-09	0.751579516590557	0.700032094890026	1.57950134506335	1.52815446887057
HAUS1	645.482715271576	-0.393787746612898	0.00280632370624902	0.0166292760050058	3.65946841702359	3.61866256274088	2.96430502128807	2.83788477825756
HAUS2	1286.70445105203	-0.386763050974852	0.000603254040636652	0.00467431708017868	1.88167575666788	2.02805958921821	1.4899624091373	1.63899018883233
HBBP1	25.2270352509975	-1.95366672903673	0.00355988989618086	0.0202806724954642	0.499088596168429	0.201485996945653	0.102896808878275	0.0887946544555323
HBE1	228.087325674938	-0.661066321376541	0.00357769016440168	0.0203655366257703	2.10657439905599	1.85093654271352	1.48985103814309	1.1354144898261
HDAC5	1976.9250221884	-0.494761215671143	0.00160860557420407	0.0104648895101049	2.82149076852077	2.19502058182307	2.07578562400357	1.65686402427906
HDAC6	1448.44651558695	0.508871393054025	4.89501973341802e-06	7.43047043083562e-05	1.21740594606552	1.0992583089147	1.69733644529243	1.76034335453247
HDAC9	2793.82942046422	0.479970548113287	8.17678945931182e-05	0.000872813157962767	0.891118812267343	1.00207918229168	1.24507374218973	1.5180148019324
HDDC2	976.031512315855	-0.353682742688911	0.00226931048229018	0.0139480056198957	4.00773477918826	3.83333347145666	3.24799397638206	3.18243157170539
HDHD3	106.767225126951	0.996105572009523	0.00064415404452172	0.00493278334719116	0.219860809759016	0.190489225031516	0.44229563944587	0.418525303277848
HEATR5A	3276.60646321105	-0.348651667665683	0.000113235210292057	0.00114508800256409	2.78514390854477	2.62727059435309	2.24111446328202	2.21215074784611
HELLS	1364.66506518626	-0.904038588043729	4.1578830982142e-13	2.41985345790674e-11	2.84688310335696	3.30856897846132	1.6111223148647	1.82897925369037
HELZ2	11926.2782785205	1.33292051818913	0.000812378757935722	0.00598446662752439	3.2422048866946	4.50861594027964	7.8479137666774	12.5876971566966
HERC4	11297.0984586329	-0.378544988407311	2.14827370363926e-05	0.000274924151160988	11.4705556927508	12.7011570577276	9.33215282387956	10.12900153842
HFE	496.574844906147	-0.818110540547001	1.39541061621571e-08	3.73512009600031e-07	1.64497170398393	1.65451219313465	0.963468454945551	0.996329038701354
HGF	27904.3496318435	-0.556296327963661	1.75436732818393e-09	5.83098486850897e-08	24.7386451082251	26.7512618781441	19.3980025718062	17.247337821419
HGH1	715.541258421937	0.477421180634154	0.00071729875881807	0.00538876935789087	1.24799495241177	1.49186509171694	1.92706609556186	2.05571670171115
HIBADH	2080.84342168489	0.496835283305248	5.13559894465969e-06	7.71219601689474e-05	5.05334862401662	4.93851834311697	7.84947563457873	6.9166428690807
HIBCH	605.517677010094	-0.639305201743938	3.90797505258939e-06	6.06341350526757e-05	2.15069415898096	2.25122154026752	1.54372504889796	1.41334926228477
HIC1	1387.53205275403	-0.5093623470091	0.000145966183582288	0.00141837338948101	2.59961116340038	3.31272643596707	2.18973503312754	2.14960534384689
HIGD1A	2765.92468205712	-0.968706229780774	1.86558498778972e-28	5.13072451739973e-26	6.88410595276137	6.98123422682214	3.71942733413929	3.69833126765182
HIGD2A	726.17605556955	-0.381867842632401	0.00367659190930804	0.0207718468347408	5.32610800050132	5.36755352872831	4.51115615925185	4.08095837091579
HINT3	853.26270783585	-0.994392031826756	1.65516810720188e-16	1.42425692463887e-14	1.96876457021444	1.92056434399931	1.0377904254168	1.00729857812382
HIP1	2940.59226447441	-0.568531397992588	9.27741792796005e-08	2.15082750177798e-06	2.58723068173515	2.46587127469982	1.90426652165535	1.66425184984786
HIST1H1A	119.073680200767	-1.37239819764013	2.28714889886017e-06	3.77851006541964e-05	1.10446245736294	1.44510091151226	0.55194811940001	0.474518936593137
HIST1H1B	2751.7309077838	-0.709243520186051	1.87092579745021e-06	3.15403909074959e-05	21.3112976156164	28.7618391377305	14.5856784795491	17.4374249296944
HIST1H1D	2291.48888043153	-0.599310490176931	7.09349968542249e-05	0.000769477390469729	17.5467314676759	23.6144602930877	12.897298666857	15.507533094615
HIST1H2BF	421.369849344978	-0.599840933656545	0.00463713699295184	0.0248594881318824	5.88815046200078	7.79692236668936	3.95364750246261	5.47733955992879
HIST1H2BH	1045.05210743185	-0.580705034179343	0.000562382157863686	0.00442150905055833	14.7767448387789	19.370152619307	10.4505630748854	13.4127111269731
HIST1H2BI	955.972048355635	-0.522880816337497	0.00752128470066365	0.0368086319649366	12.184088434124	17.7178290566424	9.27690920750337	12.464151702647
HIST1H3A	481.235878850911	-0.737696597800147	0.000123858459010142	0.00123295865583836	6.27180707369141	8.59951041921269	4.22386228963911	5.08425127806499
HIST1H3B	1394.07561244682	-0.622427049940803	0.000342419565754418	0.0029356826584789	17.5782889981559	23.9115214383702	12.1292727775463	16.0442879282242
HIST1H3E	714.69500868956	-0.876363830898768	6.91112433571011e-07	1.30289556361116e-05	9.89948732552769	13.3102598136505	5.93381143023243	7.27224055739338
HIST1H4A	294.128238589208	-0.547769056920327	0.00979852813927947	0.0454327787376971	4.98787360913083	5.88940319297999	3.32014098462937	4.45683921982674
HIST1H4B	1439.67627729779	-0.386429876189352	0.000565971844251247	0.00444226138078791	25.5526714109319	27.3369089385381	19.9573898882958	22.3873004369923
HIST1H4C	1218.1723865096	-0.391687056296992	0.00103614939025783	0.00723767870765917	19.0306562317607	22.0234850171052	15.8841954629948	16.829508894705
HIST1H4D	1005.93311075467	-0.865236254255942	1.85697767247264e-14	1.27676317814222e-12	20.1049492887959	20.8485164802767	11.6534340980618	11.8785230458354
HIST1H4E	1860.45329822371	-0.584327741611188	1.00833653729563e-09	3.50941148191277e-08	34.0734561178739	34.4275168083484	24.204651467161	23.6313312117329
HIST1H4F	491.292646690154	-0.800392973342746	3.88251408529412e-05	0.000454179671062012	8.22922989227837	11.4332695138422	5.33048210511786	6.45315553405284
HIST1H4H	1453.67666038586	-0.470658217978506	0.000650170068215021	0.00496693103310669	23.8436291022786	28.4463614116931	17.7940339854424	21.6695756795137
HIST1H4L	377.757573245517	-1.01020728533404	8.8560342956743e-07	1.63225672839853e-05	7.10921850989388	8.95986502248691	3.55278693339073	4.78253131666023
HIVEP2	11977.3875571091	0.635024186430439	2.20097122385753e-13	1.31365201641812e-11	5.69829677892634	5.46277329281914	9.44293181883374	8.70854973735154
HIVEP3	461.130931941369	-0.98388198291951	2.23306673679713e-10	8.65220830119241e-09	0.249281108982311	0.25281211014209	0.124218698104264	0.141642624202033
HK2	8483.7456927256	1.00361182736316	1.13853761603229e-33	4.6968025301379e-31	4.66582897179613	4.54188225939529	9.32713430461269	10.0111059335681
HLA-DOB	32.1259981103913	2.20386316773132	0.000130150437984423	0.00128827808268843	0.00979997983794243	0.00604861843964947	0.0353024765987002	0.0426499105584518
HMBS	708.041474678272	-0.456691130986718	0.000898840938273923	0.00644686865250684	2.66270745148363	2.94280301390038	2.00381196958579	2.26811652995647
HMCN1	183.913324110037	-0.959115013458993	0.00132447112047594	0.00891840227354563	0.0892752019581207	0.0647054710567905	0.0515944958890996	0.0315947814617244
HMGB1	4772.23276122949	-0.461386978358292	1.52779907914249e-06	2.6357822735612e-05	5.58126823527286	6.34424903301915	4.3922700716836	4.67006057467
HMGB3	520.266189580398	-0.685096216632883	3.7850662655608e-05	0.000444262254734358	0.8987491323845	0.998388204118203	0.546826796140234	0.687540524946362
HMGCR	2197.96447214339	-0.421962894390146	0.00023830143025678	0.00215778945176346	3.35202547114472	2.99926989320682	2.62999290176387	2.3381155062886
HMGCS1	1983.65886383851	-0.572967776202611	1.01249079688016e-05	0.000138819119423666	2.54770717913729	2.22560104999404	1.83001010140285	1.53265044057996
HMGN4	2203.84421985912	-0.766777835580526	6.3601704602535e-17	5.86893097865235e-15	8.11022796727341	8.21015124996982	5.05515679233119	4.98780734997934
HOMEZ	571.259224458641	0.454510360702478	0.00152786970272597	0.0100468356542121	0.696704753786434	0.796373941516297	1.07331230295756	1.06363701028103
HOXB4	623.385740410842	-0.375395268323487	0.00885937864099777	0.0419944727335704	2.11230150009277	1.88996565820422	1.54382088710939	1.69339515347
HRH1	2846.22198234997	-0.380557657253198	2.39234016398314e-05	0.000300941373453162	3.89881669375302	3.83070128813174	3.02492545996867	3.1941932599148
HS2ST1	2445.82626136283	-0.361047044145142	0.000331566146568252	0.00284785472857704	2.13631487637123	2.24459109992102	1.87339771618033	1.69613577084442
HSD11B1	706.011403746099	-0.429899830809983	0.000853687512656397	0.00622404298580811	2.90072471298701	3.08949216030208	2.37844913027059	2.27311858338245
HSD17B10	878.552540189516	0.529466702326418	1.46279682772412e-05	0.000193741154916511	4.12421102137574	4.52421584847302	6.39764458156033	6.65365177864843
HSD17B2	815.501178953193	-1.04208681126124	1.16185570648777e-15	9.05343785510966e-14	4.66072784282478	4.18986196472812	2.28326768312062	2.22392218416853
HSD17B6	281.218914753564	-1.34183012733913	4.76558701416907e-12	2.43949355696114e-10	1.50730529486523	1.37456910122704	0.637617710216177	0.554536702753401
HSDL1	1280.36042297261	0.487866384559721	5.58492598120398e-06	8.28670072736001e-05	1.63092841206711	1.73304461460919	2.42042942035531	2.51525948349424
HSF2	709.315231354983	0.423110429683461	0.00144663317912377	0.00959360613257211	1.14218353466938	1.29154881114051	1.67885607949451	1.73079299656454
HSP90B1	36957.3323611321	-0.338946771482975	5.26369868871319e-06	7.88767497947556e-05	84.8430575713887	81.9982755181169	69.614732297194	68.520454162056
HSPA12A	1422.09642780186	-0.506305881701622	7.82030885663701e-07	1.46445463315341e-05	1.58902530807555	1.61784773863496	1.19921258484032	1.16441857546703
HSPA13	3715.00014178061	0.587036166661621	9.94598392297134e-12	4.81042656908952e-10	4.24400365036702	4.37628621608541	6.91650797815674	6.63794248525879
HSPA2	1158.49505418296	-0.463787520035401	0.000450114677061244	0.00367694144464823	2.97844247633072	2.62837264203597	2.27919112513983	1.98292562369858
HSPBAP1	181.275772242239	0.766780491223702	0.000741677305573628	0.00554814180692038	0.385876223287263	0.406052819532676	0.664068013931146	0.745612605583535
HSPBP1	805.641403712975	0.37316632412182	0.00308023618565182	0.0180089173572123	1.86109330881254	2.07869681496411	2.65876223901362	2.67440837725992
HTATSF1	1198.47779802025	-0.354637964861033	0.00089300331358193	0.00642321255194879	2.46403672882398	2.50312025271086	2.00356710085758	2.06383094162931
HTR1B	160.632107176029	-1.08388273000903	5.0936916430358e-06	7.66567800270602e-05	0.418270499855884	0.376382188310131	0.192214479828992	0.201195635813429
HTT	8830.25216081038	0.366944489661326	3.79109460234769e-06	5.91664937910389e-05	3.34206999130162	3.27945094309722	4.35357843773701	4.5900609195925
HUNK	228.880999930094	-1.07096610935299	5.60989681237674e-07	1.08231654319665e-05	0.242007697510248	0.243848189075992	0.134450569643201	0.107628700041186
IAH1	1122.49995099251	0.40649664101467	0.000951975275284621	0.00675745348053661	4.58616075471691	3.99922172170795	6.03666370973376	5.90487300302707
IBTK	5603.52887020615	-0.388167751923217	3.11915523245222e-06	4.98283272099941e-05	5.8404899344401	6.31250216616763	4.84430036781924	4.87388843732267
ICA1L	162.72149349969	-0.894128830130567	0.000147887800898661	0.00143053399683077	0.140628120178493	0.132475412300231	0.0724524415909559	0.081652820504292
ICAM5	988.912953804406	0.336394216869803	0.00769361958055278	0.0375602882829215	1.77776746943858	1.58676095354439	2.30396991978011	2.15226716645041
IDH1	3221.99540147692	-0.4384451772494	0.000138990682463556	0.00136042101342207	8.12915443134752	7.28710405862788	6.39878397196738	5.51981757452189
IDH2	947.78836543758	-0.745957067546808	3.34285587036632e-08	8.46333870717655e-07	3.67989954088892	3.72658805813091	2.52227536199679	2.1003605638666
IDI1	1562.92178073985	-0.437600329355352	0.000883864387187727	0.0063869561538872	2.59750073843518	2.51142322353556	2.18677293363055	1.76318424967822
IDS	7679.08724768004	-0.461959542244466	3.30200408008751e-09	1.03379261668097e-07	6.4847036410245	6.48195825664863	5.00639366057913	4.85050912718949
IER3	2614.65729032039	0.337231955728064	0.00266085690026188	0.0159016526983695	1.7565989666939	1.83709224599205	2.16980978466072	2.58365591243486
IFI16	6720.56978909786	0.448067657134628	0.000127889263041961	0.00126768537344632	10.5295019123082	12.1506531416598	14.640654773296	17.7408833214925
IFIH1	1837.13219417511	1.2917854416378	0.0024297748985458	0.0147660410428958	1.48246053979295	1.94558516592334	3.20612777722255	5.57930728569075
IFIT1	7506.39329352366	1.53590457837906	0.00793397779566892	0.0384792436244994	3.53595976939164	5.90106694718851	9.71568358758806	18.9152834431196
IFIT2	2640.32075967257	2.1575930813321	0.000193055890939953	0.00179800924722694	1.39205397328796	1.81170573187093	4.60375001436137	10.3665112598101
IFIT5	3795.51902226313	0.649174082038995	8.87214122569818e-06	0.000123821545106112	3.87199255259708	4.6122200017859	5.93610881470133	7.98776226051855
IFITM3	15452.6398139209	0.756131351895873	1.50168616502571e-08	4.01193336202868e-07	89.0436279524015	110.181452400294	155.158760467249	196.979420645048
IFNGR1	1156.50925762751	0.325440202418579	0.00367726145619486	0.0207718468347408	2.88913931000017	2.70882241200272	3.64176352085406	3.71243329952516
IFRD1	1926.75488991562	0.358797971387099	0.000165734608374526	0.0015824326869034	2.34998830945182	2.37048543210568	3.20598016505723	3.13224323801169
IFT57	1599.93561707349	-0.414776093085821	3.13495643050693e-05	0.000378081675789254	3.30528779385329	3.29823628706851	2.63118627332329	2.55614065364561
IFT80	1915.20415095488	-0.464194022923502	1.14434107226149e-05	0.000154927875285132	2.7039638218532	2.65655523826615	2.14379446018232	1.92528626574643
IFT81	627.230748562957	-0.46260211834593	0.000861931181062408	0.0062672093030489	1.06844503420791	1.19253475881588	0.884657495770167	0.830399753770439
IGDCC4	3385.3127023205	-0.414061995882849	9.87548484110989e-05	0.00101848198809858	3.65927538954039	3.2363028031572	2.81871522050508	2.6047070948263
IGF2	390.839281489979	0.769551789111071	1.06172395618473e-05	0.000145143666758743	0.24261960149187	0.279208749505763	0.495666567227021	0.432943095186028
IGF2R	20019.8352970789	0.33003188778148	3.54227168091244e-05	0.000419273439632724	7.43997272921201	7.17345643151106	9.3030930649718	9.93735828954671
IGFBP6	3091.9966329074	-0.328296661986672	0.000385764214326255	0.00324578816445114	21.3279026091836	19.8790913158868	17.1979340346189	17.1932709486528
IKBIP	3479.52297640908	-0.46668152690147	2.12974707618177e-07	4.5536330016045e-06	5.474414724751	5.92591072680061	4.38975401741993	4.24223195093466
IKBKE	1506.93087163704	-0.382407085628842	0.000225203168883464	0.0020551071221597	2.79736499013829	2.88328622064861	2.19867563839718	2.36375936840227
IL13RA1	3992.5557647881	-1.04380240473697	9.69755309754918e-35	4.69027171538706e-32	7.88795894735007	7.63787406104518	3.95967593861556	3.92806811870848
IL17RD	46.2414799716816	-1.41702483310908	0.00340726823125456	0.0195701655248061	0.0503794884674734	0.0359930466491063	0.022084463007452	0.0119304650457472
IL17RE	338.37655164672	-0.57159126302013	0.000815388455256824	0.00599718850206199	0.760610416138698	0.838653646897551	0.547353509823179	0.577698304834128
IL18R1	148.813201243783	-1.11290676106272	4.18627987816097e-05	0.000484861780108057	0.34883824453639	0.283468389294858	0.174564005317854	0.132465559572928
IL1B	81.9355030170981	-1.04273322412869	0.00696447431563091	0.0344684956778543	0.323124568862251	0.531826189534787	0.171365479863223	0.260416899360017
IL1RAP	1500.14610232012	0.876757462646749	1.93349433525713e-11	8.89153821190704e-10	0.918996403292495	0.81655576003762	1.80659860096558	1.5349668292808
IL21R	35.1566525036762	-2.06497406897108	0.000167798683553971	0.00159238453012719	0.0828394417831546	0.045615179814993	0.0161640157869667	0.0162735000959516
IL31RA	467.291207316636	0.499592387146194	0.00157340409803626	0.0102884612281141	0.544404642203036	0.471517301090857	0.739734513281272	0.769126515845074
IL4R	2772.97204319358	-0.471394892419521	5.30655554510941e-06	7.93494115945678e-05	5.01280095250089	4.4584700246142	3.64278473858954	3.51743741971645
IL6	3048.53076302506	-1.02977610703633	7.96431235144861e-24	1.48943260055224e-21	18.7787420343753	21.0643315210957	9.66255803222744	10.7574026858489
IL6ST	68829.395698469	-0.536467494626179	2.53379828119572e-12	1.33105073753001e-10	52.2417301677041	51.3305100948702	38.4265529930365	36.3421726455709
ILF3-AS1	164.900481639174	-0.776670454128032	0.000730349248664497	0.0054734528519139	0.595569474314609	0.602491723959754	0.354049959738053	0.378271409607432
ILK	11527.718316038	-0.447777396204339	4.6642410877441e-09	1.40689560207954e-07	35.6867386564895	34.7057440675562	27.1776616724908	26.8709914832843
ILVBL	1497.96748166425	0.352149072031392	0.0010131617523875	0.00710175249324692	3.21863121596423	3.3144975927732	4.1598827019571	4.57088355749814
IMPA2	504.151529215314	0.882934960657369	3.00065424522543e-09	9.52198562070858e-08	1.34448994197681	1.32282537560428	2.66282194013904	2.49050133754412
IMPDH1	2499.32461778924	-0.411566125678727	5.87507253445713e-06	8.64677516981068e-05	6.08766203042055	5.98052890966047	4.80985207599706	4.69266491825921
IMPDH2	3532.65347551602	-0.432074858664643	6.94009376517103e-07	1.30660074027233e-05	13.8388536465372	13.9227821787272	11.0389403832778	10.505253910586
INHBA	7466.48797171739	-0.636834746573968	1.37465645665697e-13	8.68510426174356e-12	8.25646013955374	9.08970898477577	5.69973853838095	5.97556615426728
INHBE	430.484975799537	0.646854715212761	0.00104935225844506	0.00730795172639049	0.919262094763638	0.650020279360967	1.34650866708565	1.24084583530996
INMT	321.766143073883	-2.02123724237163	1.11375823280823e-23	2.05547012807478e-21	1.14461360688504	1.19016199734508	0.344477124525277	0.257249460519618
INPP4B	2536.1196254237	-0.67729025726649	6.19657882464436e-13	3.53305750383991e-11	1.74684577326854	1.71658897632862	1.0920295984796	1.17662004201272
INSC	238.620770205367	-0.542220917051295	0.00749723739191889	0.0367165683167089	0.541458215806256	0.469883330245492	0.374651902022097	0.354558172500413
INSIG1	4979.05611191629	-0.370932897839451	0.000233769120028819	0.00212311575289785	10.9429697416659	10.1356783610796	9.02044848790732	8.0527903827806
IP6K1	2805.92893000838	0.572834326928394	9.7561679756907e-11	3.95050744834213e-09	2.60629791172874	2.62108091232464	3.99566906314807	4.14676490014666
IQCE	787.397337133677	-0.434410045725508	0.000443968522842875	0.00363732622744986	0.709709172448367	0.744061499858793	0.546532314883383	0.579336337693542
IQCJ	221.230903553036	-0.768528421775584	0.0053457413100949	0.0278630128633932	0.479355669923494	0.751556952362778	0.313316196418601	0.439758229224645
IQCK	420.525227002218	-0.520292710966951	0.00103039161768501	0.00720811612451366	0.860806535468785	0.784110792715823	0.610653764365592	0.592383005266629
IQSEC1	2108.69709453389	0.78784695744088	1.6881781961951e-14	1.16642302363706e-12	1.17065097216669	1.13271011706812	2.17227784783376	1.99359682573259
IRAK1	3507.73919821365	0.579423386103071	2.37137728371886e-09	7.75313234998617e-08	4.274963869285	4.84536513044807	6.95396903387138	7.30012159927198
IRF2BP1	421.941980342847	0.452990781789302	0.00429634921449285	0.0234527941817762	0.776916246319675	0.831812424451701	1.09942155904713	1.20386192544728
IRF7	980.189146056384	1.07905118669218	0.00368016821505282	0.0207718468347408	0.741601151098374	0.964559433138901	1.44987832796009	2.32183346887073
IRS1	12283.8232019237	-0.489671173480842	1.74738612489785e-09	5.82157667169056e-08	9.39513629215192	9.60867628312714	7.33788000365578	6.83051303944576
IRS2	2462.44902700787	0.652394949592976	4.22668440494257e-09	1.28877120573314e-07	1.44012197834689	1.73018146103622	2.60377910938887	2.60399502260781
ITGA4	3326.34809549198	-0.698269413244613	4.25143938803147e-14	2.80319182867707e-12	3.074476994985	3.14098708531419	2.08734485831456	1.92264705779167
ITGA6	10026.2013284812	0.404481817107874	0.00145718886673966	0.00965596635611037	7.65775220263718	8.78075858644891	9.96356604682576	12.8138452441345
ITGB1BP1	1946.77527246673	-0.563656121132643	5.0455144498444e-09	1.5057103334791e-07	4.7137138642063	4.91499768440562	3.47600504408862	3.34230534600778
ITGB3	2205.28169824651	-1.07003466957629	5.64478534771309e-27	1.34192812350888e-24	3.62144113008221	3.4388583417196	1.81507531950401	1.70780327728749
ITGB5	13477.5453724105	-0.667157085319556	1.20694556136966e-16	1.07143154707411e-14	22.3100088160347	21.3787817893274	14.7262745364912	14.0866125765087
ITM2B	6995.95834264039	0.331288403956541	0.00020818214393378	0.00192355912438419	19.4090175176013	18.3875831229617	25.8345534649854	23.972601440956
JADE1	5090.06770917053	-0.402311684651767	5.4447521613214e-06	8.12426529943552e-05	3.84852982659243	3.75451199356982	3.12572460035773	2.89857344388636
JAG2	29.0472350375959	1.45835612466682	0.00878098939346088	0.0417498838076889	0.0138257813240689	0.0170667444713606	0.0464843167443244	0.0417849737833446
JAGN1	1247.894984941	0.377153736626545	0.000365902998223646	0.00310287512278407	3.77653776246523	3.79898474963335	5.10349465137508	5.1998249619016
JAK2	1322.44952709222	-0.569581961695784	3.77662858310298e-08	9.45910580475043e-07	1.60432305218309	1.62630558218975	1.14090567577177	1.1382931273939
JAM2	148.62442564126	-0.837169551303253	0.0012020701542999	0.00818855560185063	0.239189888398445	0.232790211861901	0.156609950362011	0.120080351318924
JAM3	2411.17709935133	-0.362532866256734	0.000182423317570687	0.0017149259063314	4.34970637699641	4.20365129757685	3.6022539327492	3.36608721575445
JAZF1	2567.51335554472	0.733331117752959	3.14507737608742e-09	9.93532776509058e-08	3.62173999871195	3.34905517613817	6.6558377849159	5.4845109637317
JMJD1C	8640.2021134403	0.364020486321334	1.32127367255712e-06	2.3194223443412e-05	4.49811862115001	4.52407443129007	6.06474759462205	6.09374738174957
JUND	2235.55888147508	0.414368284571457	7.16310378682315e-06	0.000103257650271307	5.68403285311508	5.60997497220437	7.78710409330733	7.97895888280102
JUP	558.391723201749	0.608290214057565	8.05510508476437e-05	0.000861134938406288	0.790742588579864	0.664747994377121	1.19292583181049	1.13845352758919
KAT2B	537.12792350372	-0.44786040170924	0.00174789283638248	0.0112303916276229	0.710099113125399	0.777573472976364	0.555235361423288	0.585278074017195
KATNAL1	3607.31678024099	-0.82791868108245	2.90512375336341e-19	3.51269532454097e-17	3.3427480863132	3.62182343966871	2.11322862108974	1.99210693416842
KBTBD7	303.892164379342	1.035608697404	2.66642309056768e-08	6.88752306966893e-07	0.377820256418511	0.348179084666712	0.815908166406451	0.746059502728837
KBTBD8	304.867441444293	1.18820622308891	3.16925632493384e-10	1.20140511387897e-08	0.209417451058043	0.251690738762552	0.557592137218103	0.537414379176937
KCNAB2	93.8475840360039	1.21580098566845	0.000512323381784481	0.00408983935851402	0.067897859080802	0.0446786800061083	0.157300184197098	0.119409379665301
KCNF1	39.7476940314677	-1.41611253143475	0.00198278542493826	0.0124822928052891	0.143686930919613	0.148644335721783	0.059247703845158	0.0553883649862054
KCNH1	28.7972918551708	1.77723935404518	0.00316129129688099	0.0183603609648251	0.00842118634141246	0.0102377306923255	0.0412289027220053	0.0252658364793592
KCNJ2	1425.76651126181	0.556097339730603	0.000575931738111212	0.00450530873326707	1.3814654431304	1.09396216012465	2.13847799833912	1.67945570871849
KCNJ5	44.2193000191942	-1.29987767072882	0.00639478188995662	0.0321942608716911	0.158405660252069	0.0916034991287928	0.0568054476845866	0.050461950057085
KCNJ6	64.8116618143823	1.37928459053594	0.000292982384356913	0.00256675260648974	0.0667274061422184	0.0832844895976968	0.217002678733945	0.188760249310309
KCNK2	523.115918693833	-0.90011955883671	4.39302632616386e-10	1.61723326117518e-08	1.03536007830533	1.03189557518897	0.600990398834892	0.559009946092768
KCNMA1	5472.63555268837	0.359387918929149	7.64079907998944e-06	0.00010935698764891	1.71285765350622	1.67596812525835	2.27598615215627	2.2773975022833
KCP	34.7113447770916	3.32972712248073	3.55552857050293e-06	5.60335322807575e-05	0.00459677686757505	0.00922078277688786	0.0421563870553811	0.0993321682327398
KCTD12	1545.34143799813	-1.02045980035036	2.55998683137806e-17	2.49349828450755e-15	1.74418827897382	2.09962413014849	0.990910009812404	0.989803423712307
KCTD16	786.703029706641	0.636886039671505	1.44650052664805e-05	0.000192127049117098	0.741133820063494	0.630848846745984	1.19054962987098	1.04902212640858
KCTD20	8175.47157958056	-0.377115410560652	6.94754262227262e-05	0.000755983187121767	9.83693070035821	9.17746035914274	8.05353595511998	7.28018058898227
KCTD21	1435.63617574671	0.539889380531076	4.34428515435153e-07	8.70273919097775e-06	2.04967262917749	1.93237422986943	3.08261599780885	2.98578669304502
KCTD3	3535.93253375441	-0.421293918965985	8.61978550002629e-07	1.59710847322812e-05	5.88535722174366	5.73496080155569	4.57187920562176	4.51693596586784
KCTD5	898.726895450825	-0.471410414937631	0.000140448292142539	0.00137372925076098	2.49334102415343	2.40810621628545	1.75537553241969	1.94933516392393
KDELC2	3397.23197271195	-0.705030671102858	1.42592229554896e-15	1.08695576724835e-13	5.46287104773924	5.84239576781934	3.6761612875727	3.58116125972504
KDELR2	17603.919424599	-0.350989075348345	2.97453784917672e-06	4.7899963114297e-05	38.7223804095471	41.1279152348419	32.7952354617487	32.7394532415365
KDELR3	2764.00175357892	-0.91086092457758	1.28937870820127e-16	1.13030161007694e-14	11.2559209516072	10.7585525627802	6.59339290943609	5.66844904794196
KDM1B	1061.17144002953	-0.787766315371727	1.10876134323192e-11	5.325851575401e-10	1.96178574058122	2.05165391231812	1.26368471923211	1.16905514406185
KDM2B	1386.0563182043	-0.600215347398839	1.02330273769956e-08	2.8253630312941e-07	1.64778493559968	1.71547954498843	1.1276496812492	1.19468235048668
KDSR	2425.6087071193	-0.654675273478016	5.38994727703895e-13	3.11108644064808e-11	3.3260749281717	3.27605648948759	2.16643651600988	2.22613989675745
KIAA0101	591.394535168526	-0.669406897319529	0.00072522237499966	0.00544246604159723	2.10075884008642	2.75187721282553	1.33238142994001	1.85603359327611
KIAA1191	3939.03406893203	-0.528065768527457	2.64633670706024e-08	6.86090917804564e-07	9.79746950877709	9.21361467720265	7.17282954668937	6.63729060384058
KIAA1217	1658.04763626296	0.729003693185622	5.72494030790921e-09	1.68693304114989e-07	0.72283805711001	0.84344834979399	1.25535285470856	1.45882350008295
KIAA1456	364.954741812837	1.30488082813453	1.13329063134517e-14	7.98770572625495e-13	0.119673282658541	0.123551855553623	0.315543751264065	0.313295867431254
KIAA1551	1400.0518080774	-0.356275866416594	0.00048811099763253	0.00392785132116688	1.4463245611269	1.47325315828478	1.17783341586719	1.21007540241384
KIAA1614	445.879864425732	-0.452546045805848	0.0040582201488463	0.0224538839478178	0.734820504318495	0.699048513771282	0.579354848448329	0.518731034105466
KIAA1755	433.469526412822	-0.81620241455097	7.70180442185472e-06	0.000109893701750696	0.558430963973422	0.43745510304574	0.311972148003448	0.282144368283149
KIAA1841	757.878392848771	-0.863589397729134	8.95421189662362e-12	4.39132084133017e-10	1.01172980327145	1.02705998756076	0.606419087298227	0.566603792854085
KIF14	1229.06648641138	-0.419749226017324	0.00776787397013388	0.0378174940316202	0.963636541361239	1.27610970655542	0.792717912478483	0.956900590498461
KIF1C	7854.46833380541	-0.334841336236879	3.26775859597093e-05	0.000390405298697515	6.51526494713062	6.28613501095072	5.39471784039596	5.23539279327886
KIF20A	1641.32036970634	-0.573663953416293	8.52361688696644e-05	0.000903057650075882	2.79799490837487	3.75605438439693	2.18941261004813	2.41216311102464
KIF3B	3108.56052556652	-0.438967934815982	1.24808068700711e-06	2.2075132050393e-05	3.45559110375501	3.31378008875265	2.66459836276068	2.56618318651088
KIFC2	614.905133035986	0.380786135332863	0.00617713049965741	0.0313914610102155	0.908236409260924	0.985884061754207	1.23386155074472	1.34523946812774
KIRREL3	902.325779450472	0.460223240592286	0.000283637903958854	0.0025014009084344	0.996346523447948	1.07098936766815	1.40158632832148	1.57385254885494
KITLG	1890.29818633844	-1.17798487517532	6.82824641629959e-24	1.31195868815093e-21	2.58236165107985	2.99442506640217	1.21465684593999	1.36353819630091
KLC2	1530.12228440734	0.347372186200911	0.0106363750130468	0.0486105558595616	2.10145401950062	2.67315259640766	2.9988508943492	3.34733302310144
KLF11	694.642968399641	-0.659779716333227	7.97753847248553e-07	1.48991950219816e-05	1.17728206437371	1.11267546357976	0.72494654668219	0.7945564498048
KLF15	27.4089733297806	1.87330751163172	0.00440101357924254	0.0238795421518205	0.0393229229067806	0.0131464625729886	0.122765935254601	0.0849732607456309
KLF17	27.5005612537013	1.96988751366598	0.000979075850299933	0.00691158048170209	0.0178551275386946	0.0238773467048567	0.0789701052610054	0.0904174467870673
KLF3	3726.83393176041	0.432635983408217	7.18722114092452e-06	0.000103498936060172	3.41172533513368	3.11995818304706	4.73739997205065	4.50113914179805
KLF4	783.44301198541	0.58180290493708	0.00110134202799271	0.0076140139863121	1.18341244549983	1.24661034464382	1.56858741923143	2.2399360129906
KLF5	1771.93763424303	0.603078079644713	4.30140854640635e-08	1.05844835564729e-06	2.2677350804428	2.06969557395336	3.58385393855262	3.32327632849272
KLF9	1686.35291955865	0.417631870125494	0.000784221897868558	0.00581765832568065	1.70631509992244	1.49784605016266	2.39198952730161	2.09546348192694
KLHDC4	525.394516655128	0.414725242553346	0.00365321930391693	0.0207027072988436	1.3086523574555	1.39315039261166	1.90226572037357	1.86461873217671
KLHDC7B	27.5086755993167	2.48988722428003	0.00019811738735274	0.00183904333223662	0.0228225130335973	0.0083236755257764	0.0793485421858046	0.110862199249452
KLHL17	761.054743138379	0.359458825089372	0.0050217999992528	0.0265294790167683	1.43523780083354	1.57623599497268	2.05905412261405	1.97981084421899
KLHL2	956.362061602995	0.432279288089072	0.000190011832910591	0.00177437148362447	1.44278042059126	1.41120740347096	1.98643686419499	2.04866951396048
KLHL24	1227.02203750301	-0.555175462067167	0.00230820404857712	0.0141313269250732	1.33123360649123	0.970522619516049	0.929967822544176	0.713346138678151
KLHL26	341.044137604907	0.482789226248466	0.00417888270547448	0.0229854936576412	0.455635295039788	0.463355918436576	0.658510440371131	0.686113469017371
KLHL36	4409.36750138495	-0.593080691618437	1.32445796914424e-08	3.57935404146764e-07	4.25914880607516	3.8534796655892	2.97056026238761	2.66361546406825
KLHL7	1379.55838666528	-0.373123455293117	0.000579599965158816	0.0045279805363289	2.28333912764887	2.1147199591167	1.78214284943771	1.77753462234311
KLHL8	930.023726718933	-0.368020119270862	0.00599888933518882	0.030685784761254	1.11731359837249	0.95121809343399	0.859650885057395	0.822158260469697
KMT2C	12669.1400530966	0.485443719773957	7.86685951794503e-11	3.24531092937344e-09	3.63425344655793	3.60896691333334	5.35450596448333	5.26410901059889
KMT5C	145.112974067407	0.76595937355135	0.00218245861394684	0.0135029397967439	0.282197107396606	0.255178873730244	0.490852728759614	0.468835006407372
KPNA1	5387.67421553062	0.331589629207919	2.63001458300577e-05	0.000324437858761996	3.90552310716225	3.96709319471125	5.15571626178639	5.21706373598879
KRAS	3547.4630882289	-0.601338878093237	5.45942683316097e-12	2.74458497354537e-10	4.08967955189834	4.31352257973312	2.95182895974652	2.84513311761149
KRT10	498.022976659065	-0.404767005167122	0.00811451075468325	0.0392192032547165	1.58041055155063	1.48523543139871	1.28330111240968	1.14388123043887
KRT18	1384.54058840345	0.422314615380366	0.000819287058978756	0.00601761689492129	4.75025231673675	4.15746173282351	6.62313098229847	5.89604218475458
KRT8	1466.87436793171	0.60973835197424	1.70228809962016e-06	2.90465850185796e-05	3.14803109851613	2.7772264946547	5.06803289215883	4.41343408523552
KRT80	533.946120670926	-0.653463136696818	6.18027198537622e-06	9.01551768096792e-05	0.930687951308723	1.01016587894719	0.666696427089659	0.623626247400392
KRTAP1-5	106.644992327214	0.899167647941702	0.0017025792463279	0.0109895888214427	0.179262581326843	0.186844238936938	0.362130825371339	0.352154670725477
L3HYPDH	1616.3753223182	0.331590529621046	0.00171125443523215	0.0110354274522143	1.79189172337879	1.9978362683257	2.51808836784704	2.46825387729838
L3MBTL2	1089.41690211812	0.377530700494395	0.0012735005488715	0.00860824997516709	1.76332187829018	1.66910034100433	2.24118082357695	2.43357022548324
LACTB	2072.26890145828	0.57635771229588	7.47355873118485e-10	2.66051103460911e-08	2.48748944688081	2.58337337847072	3.93016140399306	3.98375100829118
LAMA2	388.754019379374	-1.12596315784849	8.8390386258853e-08	2.06627259611112e-06	0.365603120962673	0.269716458651229	0.169412549379573	0.136347404599662
LAMA3	320.208804654695	1.2509798333325	3.25682205994042e-10	1.23127186557209e-08	0.110044921179294	0.0843033606227673	0.251627194545196	0.235950311637886
LAMA5	687.796536491579	-0.512459817858219	0.000823127373125508	0.00604039906943126	0.429417214420437	0.388400569247792	0.329227481088135	0.271735386458656
LAMB1	24652.1325816125	-0.651552401031153	1.13829792666181e-07	2.56272338994519e-06	32.821151959895	26.7543078509075	21.293668848079	18.4392114563896
LAMB3	4447.73316540465	-1.00266393255253	2.10747211092514e-15	1.58921525956108e-13	6.8158593956717	8.47040183366526	3.66791396727898	4.31328017964246
LAMC1	51059.2977714331	-0.860929470485644	6.50377637768483e-20	8.6058459880573e-18	50.6190262933722	45.9274227956689	29.1463386360016	26.5263900234197
LAMP2	9554.12246313611	-0.40853896347434	5.25494168771295e-07	1.02106991113265e-05	6.7324811179101	6.69695199040607	5.46622073584096	5.12718586220032
LARP4	3311.56857059927	0.758980121610713	6.23548509709194e-17	5.79198105773587e-15	2.03503213755392	2.19834865728746	3.65764515086304	3.83827004645963
LARP6	2444.74354666198	-0.384484695825903	0.000113859588692495	0.00115041797495776	6.37609405662557	6.00973880947801	4.76105723973585	5.18190088669181
LATS2	6701.86171576662	0.486640685992605	2.84359049434874e-10	1.08087263614459e-08	5.76230817707051	5.88978955436572	8.49425608013536	8.59929559012214
LBR	3347.5938756944	0.424042791539031	6.48347041596657e-07	1.23054338368535e-05	4.08138943851356	4.24648030376837	5.82975484335058	5.865559647427
LCOR	3396.41709480309	-0.342382305917084	8.25945384918482e-05	0.000879628699230572	2.02727294521817	2.14879986320006	1.74152443964926	1.70559521166292
LCORL	1011.81845417943	0.52039625749181	7.69726375800464e-06	0.000109893701750696	0.5009785095509	0.483758104706923	0.757215518751704	0.722878334128379
LDB2	1501.98963436456	-0.643421364407	4.20487770579821e-07	8.46163769031932e-06	3.36115992959117	3.00319814157971	2.29873344375428	1.97133518560098
LDOC1	920.124311866323	-0.346627069876379	0.00800213452655291	0.0387695816474719	3.7935143611717	4.32730268644417	3.5081577779847	3.1667776339364
LEF1	826.754084886541	-0.459898094862564	0.000593643952071979	0.00461043747052136	1.26428067262629	1.42131397309442	0.956262676432523	1.08559244642309
LETMD1	1268.35507610932	0.396369349298387	0.000198527300171285	0.00184162957156247	2.95289499744501	2.87571306391942	4.03662131546146	4.0011294907688
LGR4	1047.11181374468	0.432097565805488	0.000513662039675861	0.00409819326990537	0.943797926327158	1.02330127901311	1.46772720889141	1.30759732452953
LHFPL2	3547.47394907024	0.51883479719358	2.43073067700158e-07	5.14229690431737e-06	3.15141172485269	3.54154822334502	4.78013586741965	5.25229914722808
LIF	3263.06981851292	-0.34000736809374	0.00010870311950962	0.00110563448458443	5.21593456810556	5.41328948058111	4.27238416792269	4.51878435077325
LIG1	646.853555337734	-0.364678381024835	0.0105528203385964	0.0483231661995277	0.867112545625312	0.942265438951773	0.681978077228618	0.788121646213519
LIN7C	4554.8664432172	0.535953757033371	8.68214079947153e-10	3.05969112696954e-08	4.23472858234343	4.63680706869924	6.64433936476878	6.8139648942087
LINC00327	53.9557327483004	-1.29030037880807	0.00300403826308219	0.0176427798308054	0.202196510035165	0.222677264952155	0.0649822683764095	0.11682574126776
LINC00341	811.425332172708	-0.553654241365596	0.000467417930304371	0.00379838000605394	2.2076732796752	1.73905595169057	1.49334099699702	1.32911715369825
LINC00342	746.70026340393	-0.412352041669458	0.0012073423896097	0.00821648925602407	1.62878441214092	1.5228441120653	1.24339204950171	1.23934258958135
LINC00346	159.640624170049	-0.643083167868207	0.00817935169500648	0.039464598167926	0.186503205715438	0.169334527111148	0.108791042405333	0.130353652079604
LINC00452	339.428302491895	-0.49854718844247	0.00298594354131682	0.0175585051729149	1.38632726127582	1.47693185237768	1.04585838637309	1.07418324825313
LINC00472	1207.79835133752	0.646142754908692	1.25897965313258e-07	2.80575475911283e-06	0.521624841826028	0.619474648450407	0.918062218303862	0.94722188881122
LINC00565	177.54359067882	-0.84086258751133	0.000255263036243467	0.0022892067431911	0.518389546264668	0.545879270931981	0.336191268671011	0.285336736834086
LINC00667	837.522749521251	-0.50291379089395	3.55236711323901e-05	0.000420113837523528	1.39498365639334	1.46275882673838	1.08147543699658	1.02872041830354
LINC00672	239.269773956306	-0.792472503128196	0.000133482964384842	0.00131754543171133	0.495846800517812	0.454046129154446	0.312229943083238	0.2628345020755
LINC00863	152.052183063798	0.713077312396037	0.00359317511562577	0.0204205324845085	0.211313875683745	0.204810264116441	0.337425945961634	0.377795687987519
LINC00950	26.0472880909963	2.32053473904781	0.000250448008196639	0.00225034193655737	0.00828208606264713	0.0110754874155183	0.0517132484658023	0.0483446968363868
LINC01111	965.231074389714	0.847155328002661	1.72748112989052e-12	9.31909627994018e-11	2.37018677900407	2.50125687773297	4.40613678212838	4.76324991535486
LINC01224	329.946373637051	-0.839396240091863	9.55320746702923e-05	0.000992542873574459	0.855366659993318	1.05961592004611	0.469030826925706	0.649285629135519
LIPA	3372.28640266938	0.470068594440117	5.31777490106121e-08	1.28598466831525e-06	5.70350891361903	6.01381235459324	8.38985033327425	8.59682524636676
LIPH	22.1460484855888	1.76715917727366	0.00740600741113959	0.0363459272038642	0.0175584241708101	0.0301893049687921	0.0861414675549851	0.0808118690627199
LMBRD2	1084.04027479346	0.431180712333616	0.000114970629349625	0.00115887162617033	1.64103656106572	1.65871541890077	2.37312037871359	2.28525080947274
LMF1	505.131238538068	0.38734363586872	0.00695113908859064	0.03441464061298	0.535175787460776	0.54874806125669	0.745233543448889	0.738802687756378
LMLN	493.066408392308	-1.07275566993161	2.2042362218212e-11	1.00705593639297e-09	0.48836738303053	0.593924616101471	0.2674283501244	0.269921351753489
LMNB1	1206.99602286013	-0.528838753322825	0.000556151395741336	0.00437742956041974	2.16600495749496	2.57710415502275	1.49576623773119	1.94295806750823
LMO4	2128.11812004055	-0.39659370081398	2.47905033952032e-05	0.000308802487230125	2.6257759000545	2.5502586814375	2.07450546018982	2.04434974916003
LNX2	592.312347191326	-0.719006552587505	3.30748725800945e-07	6.73306477225552e-06	0.833189728859486	0.943191643747439	0.558555138071458	0.56944377875305
LOC100129550	475.80143914628	-0.527853100802112	0.00215826268452069	0.0133886742207374	0.57179419572275	0.528508281114304	0.444643781474116	0.355151044956304
LOC100419583	1317.3282673657	0.606268184893048	0.000874377504220698	0.00632818311362204	1.32330777107942	1.62216643448317	1.89471863716457	2.79544831241868
LOC100506175	54.8701763318096	-2.50404316876209	8.36010562126546e-09	2.35933282583238e-07	0.846224832439952	0.845479298507743	0.121467079356531	0.191077838578226
LOC100506178	109.665578135155	-0.957548921614697	0.000905751339467168	0.00648721976033472	0.356939534910306	0.330720762704318	0.204963220337794	0.166283251669209
LOC100507487	154.016841613847	1.13078904951029	1.19827101904016e-05	0.000161916660048721	0.29707893053743	0.240774792046395	0.660477244001136	0.580063532092367
LOC100507507	380.262885819983	-0.619590670577671	0.00112785562275273	0.00776598083688259	1.92317311623102	2.59993282362714	1.53794447163685	1.53184563034001
LOC101927229	968.745534077268	-0.607180351865908	0.000226044682545585	0.0020614451998598	1.86553901762982	2.55428009365632	1.40709433071517	1.62331557736132
LOC101927751	245.523276719022	-1.00120545796035	5.971269895059e-07	1.13949702786527e-05	0.245176955378322	0.23434356126648	0.134320179038347	0.116705320660705
LOC101928034	41.7279593534051	-2.35412894026427	1.10950082137308e-06	1.99000748344998e-05	0.276798722169807	0.30448484133752	0.0696906444509592	0.04911387781815
LOC101928211	26.4446730150673	3.09607910832141	8.0860583933845e-06	0.000114445060570748	0.0550146167661907	0.0588560602780076	0.506678169452408	0.510110070905076
LOC101928433	135.741694577575	1.15872223615492	1.45108200333392e-05	0.000192553227802853	0.0972507431323056	0.108962236118243	0.257458375079364	0.223058490290454
LOC101928489	44.1388937602505	-1.35240864322113	0.00280375508903257	0.0166210772944932	0.195007716075029	0.17665767306962	0.0908309641184194	0.0617879680754728
LOC102467080	109.301645682329	-0.903207807009263	0.00160143819596528	0.0104327785121268	0.868410502204295	0.813764690421973	0.514529088959686	0.428357869136265
LOC145694	452.481161617863	-0.484408014937142	0.00171106322937887	0.0110354274522143	1.14191088300203	1.05489473828494	0.847656066841933	0.798962704513837
LOC283299	130.205125553869	1.07581871725886	0.000149018375393227	0.00144047672864603	0.106609227791742	0.08620308309196	0.236079494326681	0.191896198318361
LOC284344	57.2815322328918	1.75845956012453	5.67618235643723e-05	0.000633366219024571	0.0757226171968347	0.101262518584068	0.253291679860982	0.368343891497456
LOC541472	93.149372688803	-0.906102193383975	0.0038650500027596	0.0216325583953336	0.5777986759133	0.450222971364173	0.280525281054246	0.296725391908251
LOC642852	1364.99620281719	0.392375809569067	0.000311817235445613	0.00270640380220307	0.917206147763945	0.990285044914893	1.26546149415877	1.35365994559483
LOC729950	80.8010134033887	-1.1187832157402	0.00299480594570108	0.0175974646813588	0.27271700761098	0.278887958180753	0.17111890681862	0.0945427788984206
LOC90768	286.224181393067	0.546110711756934	0.00331522327890356	0.0191197868872949	0.236561813887095	0.272499449492478	0.388467146720175	0.387417439414488
LONP1	3686.94873850455	0.325233150703877	9.49730769724777e-05	0.000988199093186923	5.55367213457893	5.59026915793605	7.24529412278507	7.37473184161664
LONRF1	403.734369318043	-0.703585614424883	0.00025611597272925	0.00229538826421755	0.92253227149119	0.706970030679301	0.561545391655691	0.489693961304318
LOX	49316.5384068668	0.336703037167648	3.16573243228034e-05	0.000380890184544298	44.2471718614099	46.7963047933175	57.5886879285082	62.7899271192549
LOXL1	4896.02164597013	-0.337952101861548	0.000984792189287212	0.00694454260781419	13.2677034238321	13.5915512753337	11.9555262316107	10.286832440121
LOXL1-AS1	616.30794666908	-0.848821904355688	1.26881162233976e-08	3.44223439360492e-07	1.61032657987518	1.61363698595538	1.02013233959763	0.853868005406866
LOXL4	2404.78858703362	-0.488029530866599	8.60991251292862e-05	0.000910042448427557	4.77683929204322	4.09829377236903	3.55216473475919	3.0801935678405
LPCAT3	1274.13265095217	0.367700993334802	0.00349104587435815	0.0199858814015295	2.9150609595791	2.68434368432952	4.05487596643623	3.5176490082436
LPGAT1	5622.8760176976	-0.450527594331772	4.98385618923134e-07	9.73606716422849e-06	4.35068760544848	4.41513155015142	3.51550719746756	3.1996671825299
LPIN2	4857.83043417293	0.340810561653962	8.43697809099814e-05	0.000895136571137216	3.99098233705773	3.97016204970513	5.06899584631856	5.49083534656951
LPP	62200.1282898265	-0.617584991307235	5.96197933507494e-09	1.74942933376069e-07	24.0641380933887	23.0705152454875	17.5674154021472	14.5946218678203
LPXN	4752.69133649487	-0.368941960973732	0.000183840769103787	0.00172478302839446	13.6101489616256	15.3272386410779	11.1515762765337	12.2965748971303
LRCH4	2242.29660749796	0.353645356706771	0.00026430289367246	0.00235671480397325	3.37130115569093	3.67235625551702	4.60551571440182	4.81000313910015
LRFN3	452.016885490766	0.565465649999294	0.00020243144312409	0.00187536553583784	0.8043902582186	0.874416179836085	1.28646435756669	1.31068912675508
LRP12	2045.8884540514	-0.571166870180496	5.19366632551205e-08	1.25814099968276e-06	3.47151381007864	3.3462840749964	2.5262312711823	2.28007580009681
LRP5	1727.77296330986	0.750393065063691	1.11718347092175e-06	1.99867542897302e-05	1.54880380316801	1.23093057581993	2.72079280152258	2.18445410879098
LRP8	697.652808688398	-0.730355896696246	2.98613819989708e-06	4.80316220088949e-05	0.643146831632816	0.65198771364416	0.457756505743362	0.359280389663861
LRRC14	1246.75382660868	0.405371764894564	0.000813631752400619	0.00598842287788783	1.05178552048205	1.23548986747369	1.53576557545743	1.6296232050014
LRRC15	249.271344870461	-2.39574545098081	4.44934968619062e-20	6.05889113577763e-18	0.331176878868475	0.486186728235905	0.0684939364149326	0.0935856791614243
LRRC17	12512.0224676912	-0.476387534680297	1.04491118315522e-09	3.62770402349879e-08	37.5045354592307	36.6897790105559	27.1705402279633	28.6821337417506
LRRC2	508.241201289813	0.792368878933242	4.84994745912771e-07	9.52736177335088e-06	0.430226088131756	0.40725872128494	0.813066566389974	0.707468023015512
LRRC20	463.264242215065	0.39558133487183	0.00845056987418393	0.0404726882913961	0.631692247333106	0.645581977592866	0.903229202095163	0.85553955756369
LRRC29	141.963132054331	0.871384751428942	0.000683408780178341	0.00517348956807477	0.357458670010357	0.422439076985351	0.772105123820037	0.715278707617598
LRRC57	930.878035279488	-0.548048720587092	3.67440437727054e-06	5.75834589894934e-05	2.64671562499507	2.64940006993064	1.82308128716835	1.97071432130183
LRRC59	8837.37443625749	-0.367591073527503	3.60742055579699e-06	5.6660336747602e-05	19.2939261796309	20.2328963553372	15.6105250500394	16.4623436298872
LRRC69	60.1717181609928	1.13578255270904	0.00619242707600251	0.0314501618563301	0.206385900176839	0.119180185551612	0.402709733051839	0.357522089743071
LRRC75A-AS1	10723.2847225284	-0.402753795480061	9.12988264904057e-05	0.00095563980623465	29.1321421573843	27.2000218866848	23.9644082118045	20.6567109686012
LRRC8E	629.077020003745	0.535452468125275	9.29977056609574e-05	0.000970525163393295	0.795383554122465	0.791091456932996	1.149765370554	1.25911570840568
LRRK1	2555.77495437496	-0.355476602628213	0.00011429138128127	0.00115327403874179	2.20850230027999	2.11713788357875	1.78687321129408	1.75511433740915
LRRN3	1585.36268869898	0.723050327394224	4.45147610949242e-12	2.28704776233482e-10	1.85153781422153	1.86147490242297	3.31520471226471	3.10215255445779
LRRN4CL	639.730809450006	0.997807555459353	1.57897637165605e-11	7.35771514579661e-10	1.02027107457299	0.886051234730733	2.08542176616529	1.91279486680215
LSM14A	3538.1092161662	-0.720156270653173	8.69216506407261e-18	8.96443435210901e-16	3.37578084984834	3.3731353210841	2.13042121099819	2.15971017894092
LTB4R	258.012879068589	-0.582903073138086	0.00196490902759293	0.0123864332678735	0.386845637686835	0.387991379183333	0.263142521022675	0.278646082315218
LTBP1	74142.5943697593	-0.667546712773739	2.26274492119998e-17	2.26694716176792e-15	85.6620013982748	80.1384506152178	54.751843318111	54.5734585318275
LTBP4	8140.03742443806	-0.459573486115091	0.000330967937297881	0.00284445851013485	10.5064242644114	9.50534557931027	8.54703873235764	6.69182864748659
LTK	561.787739413035	-0.460786075186751	0.000831484166586952	0.00609002450159195	1.22049056421624	1.18628746758618	0.921612527872814	0.910701298772475
LUC7L2	270.065651779711	0.625658948595534	0.00106272665126643	0.00739008627201934	0.406995182743561	0.406826189427447	0.691470158730128	0.623469455461841
LUCAT1	143.978227807204	0.763223833416325	0.00418701072038733	0.023021173016132	0.55352664956429	0.674423953354137	0.969660017291394	1.20336997392325
LXN	690.119898196233	-0.51071965900244	0.000129210855243289	0.00127988097149885	4.19826596978124	4.20884117074075	3.24202002028515	2.93627054482703
LYPD6	212.898692505176	-1.20473625877785	8.64112245753405e-09	2.43374264235688e-07	0.38749292466571	0.410311991255665	0.172018446557399	0.19016236815384
LYSMD1	344.074037123711	0.479224252493685	0.00619540832803652	0.0314501618563301	0.707661701981948	0.615454161423855	0.969472445873012	0.968261805174293
LYSMD3	1845.28709945125	0.987883649212322	4.00143424274364e-23	6.92890329490399e-21	1.67735978049102	1.68038056846757	3.57409827251983	3.39922722542796
LZTFL1	662.313523565896	-0.386011480608623	0.00285148512242417	0.0168541636439618	0.940333132370137	0.983563780919695	0.7639724966795	0.776708978894823
LZTS3	655.472029058467	1.06064886220496	2.39759094629074e-15	1.79832142313764e-13	0.599228703585862	0.598979890700543	1.33104712572252	1.28655536909014
MAFF	2880.00943328301	0.58468618246079	4.6438514375206e-09	1.40376422979879e-07	5.34470698517871	5.18915040226598	7.80511803997864	8.74651329132927
MAFG	2359.46696875941	0.344771750941542	0.00111976105787444	0.00772538204547738	2.29020802577233	2.28711916917401	2.83382534305982	3.25489278395332
MAGED1	11507.2884186066	-0.459166587590428	5.40575393347816e-07	1.04725282694703e-05	26.7763412167141	25.0552208492469	20.6577791217128	18.8278242955556
MAGEH1	305.909073971114	-0.528489165300243	0.00309878405918411	0.0180571438363591	1.4759380861295	1.34573586473499	1.0374252927171	1.01479890789123
MAML3	1193.43212613145	-0.392632251161845	0.000579798448826944	0.0045279805363289	1.15464109595818	1.05475141116919	0.87591574692284	0.888727312899856
MAMLD1	1566.27991153839	0.40004412364869	0.00181342383031452	0.0115719211301144	1.64590149508451	1.56753307207094	2.43171594362009	2.0097205350523
MANBA	2399.31949046122	-0.60629781126536	3.31314871086337e-11	1.4521944943303e-09	5.12982805401583	4.98774447399763	3.45964270667262	3.50222190140375
MANEA	1606.13401146206	-0.329150748983246	0.00251691738434004	0.0151576999711264	2.17251482112256	2.31198743196924	1.96006447280984	1.77473891249294
MAP2K4	2611.2342445787	0.46202838340209	5.8013712516561e-07	1.11248555838946e-05	3.24142201502474	3.32119596533916	4.85850676002901	4.60435131757505
MAP2K6	133.664907699249	-0.932780929537767	0.000268621693686302	0.00239066489571325	0.071612246909211	0.0748170257771283	0.0422692733148461	0.0379834904850892
MAP3K10	658.400941077034	0.423188693779933	0.00252237403125	0.0151840421297478	0.935543091820498	0.958843331252047	1.2390676119998	1.42060033380583
MAP3K14	960.144639958553	0.658382167684663	2.83733659797611e-05	0.000347264250638856	1.08176935780182	0.834310238327861	1.68647941840207	1.49028446944892
MAP3K5	4594.74738100932	0.353028678459767	0.000988336568130743	0.00696253576323546	4.72561049835829	4.25558205695213	6.37812936648437	5.64037062580607
MAP3K7	3443.96478149966	-0.354654099196142	3.12583620623244e-05	0.000377527953735506	4.32245595657896	4.33164428766013	3.58927050384928	3.49750177444426
MAP4K2	672.741184665005	0.433960748220391	0.00162361722708464	0.0105381097765336	1.12792417745991	1.07463250672052	1.47207566833187	1.64762018546074
MAP4K5	5812.39634513376	-0.332634240106257	2.42686324273044e-05	0.000303921284308368	8.34929114270742	8.55505681405596	7.08232156344548	6.97086422387226
MAPK1	8823.29908346125	-0.336270063770635	1.61087627649513e-05	0.000211280340652441	9.34521712982699	9.39200422022843	7.92326462249872	7.6160207169643
MAPK14	3372.03532612775	0.40543330601537	1.68945863311223e-06	2.88639704681883e-05	3.69169154113903	3.69805766322742	5.08130261915743	5.16832655320245
MAPK8IP1	515.163422432182	0.479842232931457	0.00244189047407639	0.0148075900516193	0.704791311303082	0.851879494613571	1.08204238663608	1.1837024682439
MAPK8IP2	31.2913520266325	2.66656233122242	1.11577502448916e-05	0.000151940393140631	0.0165190295596086	0.012272559152912	0.0888189846019471	0.105285527996951
MAPRE2	4637.65932216056	-0.353513551804595	0.000154380190543255	0.00148310722778061	5.895366332665	6.44510042048453	4.82563442126622	5.28299839160036
MARCH3	758.258204260333	0.380264528818262	0.00460717299693973	0.0247308916425686	0.878492700216499	0.939438664709142	1.15893083615325	1.31669570951024
MARCH4	4089.05740922981	0.455095909413609	4.05008548255529e-07	8.17359697529791e-06	4.38997355771246	4.58013893259167	6.16049636127501	6.71286589991078
MARCH9	567.711399265174	0.643619143165877	7.5064095289503e-06	0.00010765327203789	0.90018288708241	0.814579704611501	1.41816375741528	1.39346378350433
MARCKSL1	1278.24009499143	-1.21923529845695	8.19206735555961e-13	4.6145356116096e-11	7.51272844199037	5.71664919407055	3.33649537345175	2.62234149169892
MARVELD1	3248.39799934965	-0.572202795335504	2.14886632012948e-09	7.09176447203203e-08	6.5334726636822	7.35782573762785	4.84050720374429	4.93355069283007
MAST3	666.400021967454	0.522149829294633	0.000180519052259567	0.0016993021657669	0.565490139173346	0.50696311211805	0.778346224419914	0.838231533046501
MAT2B	2604.90411197666	0.443710312337276	1.01753228909122e-06	1.83916338747338e-05	4.97685629088011	5.18050340506662	7.34517224514875	7.11378462435561
MATN2	859.399894189559	-0.388859939653941	0.00436788248123399	0.0237549126334967	1.45840186949683	1.24182052937655	1.1069197360294	1.05711775113351
MATN3	774.757452721551	-0.578416852665395	7.76327103513336e-06	0.000110545826942924	1.95322975261595	2.20720479711567	1.4326108552292	1.48007133153883
MAX	1695.06921445931	0.342170499608413	0.000654690993258474	0.0049987457111831	2.83412408485048	2.86096266403076	3.65854083528145	3.90168740548392
MAZ	3508.70092943445	-0.344730870731999	6.99665819382362e-05	0.000760737425012171	8.0406641016903	7.8317029527569	6.63801561482302	6.45288227325927
MBD6	1579.94619778594	0.423151844195224	5.45355463957364e-05	0.000613404630109542	1.88113401306089	1.8817062490955	2.73803626645676	2.54507945786948
MBIP	754.959478198399	0.472974206486104	0.000405417637369987	0.00337671483476927	2.07859109327483	2.36674218120362	3.32402807144746	3.12166462059752
MBOAT1	430.118739801157	-0.740522460970075	1.47179276308053e-06	2.54542112145098e-05	0.722890535416127	0.718785429064487	0.464383722275926	0.439296712681993
MCC	2710.10562323833	-0.526338433965674	3.089327971386e-07	6.33492896588598e-06	2.06609394120798	1.92645298702538	1.52110774735422	1.38300597082634
MCFD2	13587.4027462991	-0.842295044188425	1.17005790705965e-28	3.34923106212627e-26	20.8608116487603	22.1269333548704	12.5522556295332	12.5458974476827
MCM3	1566.52246363876	-0.842247510928321	1.78120550629038e-11	8.24527670997652e-10	3.38331661498592	3.87514318572326	1.94464704759104	2.29070879234978
MCM4	1995.06393880824	-0.493757799024565	0.000679279489340201	0.00514931413762705	2.39387793901223	3.10504935382037	1.85363644023432	2.22931039101529
MCM7	2209.34043252012	-0.442301802925162	0.000242134753411327	0.00218440924350444	3.7865839340442	4.27997790213278	2.83211485081681	3.37990909044274
MCRIP1	1829.81858849661	0.39037992495188	8.0127777835217e-05	0.000859229519814032	6.60305485017184	6.28388883964687	8.88599855792661	8.81578553531768
MCRIP2	152.106182479505	0.750867989791043	0.00236646802321928	0.0144564810512516	0.472116024163884	0.559755754455781	0.926912900862248	0.883471990399427
MCTP1	27.3168248083266	2.03378918413329	0.00121124843701492	0.00823508026057742	0.00804435951825633	0.0153679712948131	0.0412594426499475	0.0568902418060237
MCTP2	2022.39654002073	0.469071934892565	6.18346500006498e-06	9.01551768096792e-05	1.14489242035993	1.13646522902308	1.73480851557332	1.5719597488435
MCU	1711.89243756385	-0.485771602449159	1.01339858313136e-06	1.83405529380651e-05	3.09773778825969	3.2174485476403	2.41116300988539	2.30891777634284
MCUR1	1126.03791471544	-0.371419835179888	0.000941953390425976	0.00670260973660771	1.35659951204289	1.32876350599495	1.04820028341812	1.12660415660987
MDFIC	3053.9144812999	-0.364461286016646	0.000282353709309317	0.00249231788972465	3.40472992920335	3.80576573427666	3.03914473101833	2.81940457540996
MDGA1	246.114085523855	-0.717313053985151	0.00099922034155201	0.00702157540611648	0.169301970518468	0.229199652722911	0.127245868497356	0.125370402478751
MDGA2	2816.50395312858	-0.613777754090223	5.08645716386643e-08	1.2364410429877e-06	3.32052294806867	2.97490717463697	2.28976704121346	2.02081869909842
MDK	1289.89296242411	-0.526029353660698	2.77459588998517e-06	4.49901525467421e-05	5.46819793685598	4.99007067925696	3.7930675712135	3.82165668154547
ME3	737.160551222647	0.432328683974856	0.00116227567423768	0.00797167658037052	1.46057727961783	1.35147572301807	2.06210266331801	1.91724495179664
MEAF6	1376.66714820145	-0.344825314729699	0.00136083906467486	0.00910211193186911	1.71017879110346	1.88242168938319	1.45968486802078	1.49904182679853
MED13	9449.76215279771	0.352793238100301	2.99819073659082e-05	0.00036440748068824	4.71012596176308	4.46298221896726	6.29539265500481	5.97411608923647
MED28	1808.81204026151	0.647643811266762	2.65721690063014e-11	1.19073879387343e-09	3.4398061484617	3.36939881922368	5.56375289084778	5.61162249107037
MEGF6	35.0195567210888	1.73562467889159	0.00127634871507405	0.00861919454868978	0.0108446611138516	0.014502373771957	0.0514365483745116	0.0360528100858176
MEGF9	3386.01469526488	0.606658085312574	1.51389803711526e-07	3.32658787409187e-06	2.54221746763281	2.45753906184011	4.35369014880921	3.61836072107877
MEI1	57.7459186965909	-1.08779112047671	0.00411308999983108	0.0227173737065741	0.106887110637697	0.120150988755254	0.0556168223439133	0.0559935337652897
MEIS2	1335.15030004131	-0.381682312717367	0.000377333267112977	0.00318645429772745	1.99978505178596	1.95175320650544	1.63312034959485	1.54383288483104
MEMO1	1136.16834786443	0.500607555184938	9.26745069326746e-06	0.000128698280617593	2.70180045336209	2.81811049896776	4.21013793143485	3.96184451299932
MEST	7850.58316586071	1.10174649171831	6.77697206497475e-37	3.65591577628215e-34	9.81598299650758	9.37190797333087	22.285251690322	20.847506923218
MET	4031.29965018144	0.39119237852129	3.99892874001802e-05	0.000466630403556512	2.84607020399663	3.05620418618165	3.83868601725456	4.26320358396017
METTL10	954.500354670735	-0.397437537560788	0.00132787404633985	0.00893273926808766	1.59719156898776	1.83659853670799	1.36438477672439	1.36030297152108
METTL14	1019.16804726776	-0.359715965422166	0.00135967016456359	0.00910211193186911	1.85779839070103	1.92546996513951	1.52050507085497	1.56559496163837
METTL15	986.595766500185	0.805121214431527	2.51497252998545e-11	1.13424452429504e-09	0.980874737843289	0.898274626498451	1.74063273679466	1.70383624042497
METTL21B	412.666002601452	-0.510378348474862	0.0024890285171426	0.0150349328085453	0.939587666065956	1.03733806239988	0.663423034526024	0.788107273308799
METTL23	546.071317775375	0.46641460907974	0.00111080195433546	0.00767493015345276	2.05912567427935	1.96598010914967	2.99362857139265	2.83618127064199
METTL3	1480.87031033149	-0.370632468593701	0.000374796269120088	0.00317062272055389	4.78160276239891	4.77319155913379	3.98594641417632	3.75248903137655
METTL8	1221.49375302215	-0.33631064587845	0.00200046299144596	0.0125597555586486	0.747415373916684	0.778731098406027	0.612407296572463	0.652878795944141
MEX3A	372.612354591196	-0.791449975859399	2.63818053292218e-05	0.000325159228073519	0.479306314302751	0.41195397905887	0.298171035366069	0.242063546361359
MEX3B	529.024716843651	-0.687977614125231	0.000296750627363609	0.00259490292980174	1.16377889137445	0.973275825118532	0.798560021925453	0.592616278465014
MFAP2	507.643069958398	-0.538941174731623	0.00119564733942292	0.00815272220843263	3.22440012814996	2.69319115348795	2.27322690283412	2.00202700539086
MFN2	3658.98518905768	1.22045051900592	2.51101828478104e-44	2.51568160445278e-41	2.74922049475752	2.68461404902463	6.48699651067697	6.77803467389279
MFSD12	2400.56510523299	0.591740202098814	2.2473496092813e-05	0.000285519253802351	4.60409726164987	5.78771475377397	7.37074042883891	9.00346603677533
MFSD13A	54.2355757127373	1.76431653930733	8.34598875444101e-05	0.000886824532346891	0.0350354200210378	0.0673501070859487	0.179452179915623	0.177226380865625
MGAT2	3182.78106704696	-0.567385328135753	1.14263440615273e-10	4.59214618358114e-09	8.17882075233922	8.03850904275056	5.83506835558461	5.62636906895428
MGAT4B	5179.47355274616	-0.544818763956615	1.13651913023969e-11	5.42204670773533e-10	10.6006259063246	10.5033173002626	7.62538524270353	7.5236096401911
MGC12916	205.736013782449	-0.572883024351693	0.00849925605029307	0.0406584465761974	0.767198851078826	0.6494998037758	0.514289857990914	0.486172127668626
MGEA5	7933.70768955251	-0.638336241439402	1.30830630579522e-13	8.34104738412898e-12	11.1563297401977	10.3215336620181	7.28200919885451	7.17291366451958
MIAT	791.828796493108	-0.967345247102422	8.69835675844099e-07	1.60954026245242e-05	0.682542141193506	0.506088136502271	0.36814974339099	0.26960232996275
MIB1	4779.31032322205	0.482559603720651	2.29826968723256e-07	4.87678224404295e-06	2.46941620905807	2.35073577849164	3.6780627124038	3.37625732852306
MIB2	966.550816373406	0.324817915686983	0.00630821924435191	0.0318384610008204	1.32482093241345	1.45587233379905	1.84985372480452	1.79143546625571
MICA	1546.82206017875	0.47667740340947	6.13818057990564e-06	8.97748913594958e-05	0.635056800858606	0.612539906738214	0.876596709163587	0.942725465314164
MICAL1	2950.75336725256	-0.942727521577242	1.12748377735065e-24	2.29189673349569e-22	5.79078645782957	5.5794024931308	3.17176258679097	3.02407558187502
MICB	1892.47961114878	0.370701725011833	0.00017614976291337	0.0016626356491406	0.443874414329228	0.4683697998402	0.598528265043987	0.635877996898728
MICU2	1687.24540850047	-0.377642030305824	0.000115486778600346	0.00116282667383234	5.75619671329994	5.65410958377919	4.56286245027996	4.6366535114687
MICU3	1926.75003193748	-0.482772805608896	1.25993269554846e-05	0.000168946615561785	3.17675674493928	3.34279393672278	2.60336595148211	2.27854499590717
MIDN	4347.76401020796	0.455102596325466	3.99857245627215e-08	9.90882990665605e-07	5.50049859448006	5.68853986235634	8.12911143130742	7.92705128189391
MIEF1	2633.71362797804	0.550176948061348	6.51366382416816e-09	1.89544914518221e-07	2.10815866146975	1.97125054049975	3.08455301869926	3.17628016082492
MIEF2	710.488796555607	0.618947042838924	1.62547001704107e-05	0.000212675769207257	1.16135959990814	1.29265264789037	1.82020370155222	2.12013323500709
MIGA1	1618.42944013257	-0.4885340005212	3.57449600181854e-06	5.62061445308373e-05	1.71454040153538	1.69599109109997	1.32686203277441	1.21869624301203
MINA	840.248294034384	-0.418725220992167	0.000554542282386086	0.00436966856895912	1.00949247139567	1.07345653480842	0.829614808545043	0.800546751840661
MINOS1P1	208.162232163025	0.68391176753968	0.00131772497232003	0.00888150430646842	0.416066723048916	0.392752009602761	0.708908382839665	0.653878076598595
MIPEP	824.365429401398	-0.389251839768673	0.00157227610807319	0.0102884612281141	2.27123168284075	2.17973382893743	1.82254376593589	1.73852670954596
MIR100HG	12633.1949754698	-0.50826783889258	3.12296777231343e-11	1.38179009383181e-09	11.1086986366293	11.1445586934661	8.36010796000332	8.02096458068592
MIR1282	30.6786188170255	-1.64278300410472	0.00936999298369246	0.0438662333290616	2.21191441350641	3.1222848610848	0.431598991129455	1.35184733004413
MIR193BHG	324.491021464802	-0.489035556567875	0.00913527350146563	0.0429682582600794	2.40611657878223	2.98346063590838	2.08597352890665	1.92060658577391
MIR3064	244.959662932727	0.549729780845409	0.0065861273436169	0.0330035806079209	16.5483967232702	18.357740255804	24.8779761907095	28.5190043339288
MIR34AHG	1429.11679920497	-0.428171445068574	3.20445351490802e-05	0.000384808775685787	2.23475011078321	2.32970607422789	1.73722833435372	1.81351208973737
MIR503HG	530.275934874728	0.36744293062114	0.00942052626786531	0.044044100477693	3.35547166383102	3.46307261544185	4.67095781211321	4.53508906872446
MIR5047	1079.95973110791	0.358491057802117	0.00137221487525383	0.00916508849538584	54.7958786499283	54.6884626497219	74.9289417411155	72.0718091908312
MIR614	104.831110486916	1.23574079224407	0.000109880624491914	0.00111527542228475	4.8266157109538	3.13506614414187	9.9022662359874	9.96933761172225
MKI67	8792.12292643532	-0.367042551757135	0.0072169978748919	0.0355177586642926	4.01442649202259	5.16518806644828	3.33559949478071	4.11139562631768
MKL1	3471.97579115646	0.481463776594816	2.26359029180503e-08	5.91147701571761e-07	3.28021755510157	3.44766640277659	4.96009356561468	4.87043726526193
MKNK2	4448.4913906997	1.06218025713444	1.77345491955261e-38	1.08149907398456e-35	4.34805298316834	4.45959443893551	9.64860988418392	9.60445561797864
MKRN1	2926.47545340144	0.387839112865914	0.00010289694964611	0.001054223970589	4.05943285563562	3.69075118129372	5.44541541625615	5.18317078024209
MLLT11	581.929146894299	0.512393881311582	0.000411452856308409	0.00341279583830973	1.19914529082547	1.37670816066417	1.85390677757007	1.9839652709793
MME	18640.4022544029	-0.597185279696501	1.01884245850271e-07	2.33120462038482e-06	19.9780327401266	23.0924660177481	13.5436523452961	16.2594747079086
MMP1	5854.78250580521	-1.45235262775159	0.00373393769452419	0.0210583876571758	19.5711969276485	28.7728805629165	6.59470190295765	11.8953402366464
MMP19	1270.6735487139	-0.376529285778154	0.000777090015261695	0.00577914345390272	2.4826254075926	2.41230030548652	2.05763065932822	1.89186889024749
MMP2	37759.516969287	-0.388652776283823	7.66382613149201e-05	0.000825597736715107	63.2542802490954	56.8090995918742	50.5830970967886	45.467655566725
MMS22L	1531.1334990123	-0.686746515073257	1.47925079201926e-09	5.01158734513577e-08	1.21126107567497	1.31830629149605	0.771104444074295	0.873368317704415
MOB1B	4900.3315873305	-0.557856016565856	9.77346417064536e-11	3.95050744834213e-09	3.83290071163978	4.0812822572227	2.8848733805043	2.74156530367908
MOB3C	543.857975186097	-0.38112949005613	0.00652532328166694	0.0328043671500575	1.20786664525376	1.17599732099203	0.936247697973246	0.981795702093905
MOCS1	1180.77218336738	0.544473837929242	2.62638326501162e-06	4.29343259616002e-05	1.30992540804393	1.20162237092475	1.96369946210413	1.87770895062416
MON2	5576.9359520461	-0.399625671341406	7.92663215333936e-06	0.000112529294112083	3.52113632503125	3.45661004097653	2.89053509960997	2.64817098195752
MORC4	1578.50276251162	-0.438592535424587	9.19230622026691e-05	0.000961456279235374	2.800149289051	2.67965471309558	2.23730780566617	1.9980900933884
MOSPD1	1561.31582126445	0.570367798749738	2.49969174177157e-07	5.26436582133454e-06	2.8727501480892	3.08694128851813	4.37919051006844	4.88030177557614
MOV10	4108.5178559475	0.744115937813534	1.30827133845576e-11	6.22027586209509e-10	3.84093512207516	4.06263835198674	6.3015030607442	7.5583833933481
MOV10L1	148.464985236938	-0.836439048379356	0.000666693453076613	0.00507244733181555	0.267869731132071	0.242663440914153	0.142753416859223	0.157300207758591
MOXD1	5250.81955833703	-0.540739469135486	6.44840171248264e-07	1.22554583223959e-05	12.5171681907806	11.0921660530633	9.01958819038822	7.98319197446733
MPLKIP	486.44880109494	-0.392619745231371	0.00963549020531233	0.044849553200505	3.25780073643549	3.53642986628994	2.83609817633077	2.57547747177111
MPP2	189.965524704035	1.35518255458764	6.20775494168588e-09	1.81774469336297e-07	0.110303035393287	0.109154662804965	0.270326863464856	0.318095354367133
MPV17L2	232.473405141318	0.774553689711804	0.000540968084252179	0.00429406810963274	0.69916366862859	0.763871916347485	1.13775878703976	1.47940961229214
MPZL1	7865.09511818529	-0.712700830078694	1.16962606160499e-18	1.30199802698981e-16	10.8753685052629	11.6910691328038	7.2652496840125	7.14607622480455
MR1	1942.31800627709	0.485119295876756	1.68952800188098e-06	2.88639704681883e-05	1.21529881903905	1.13097941206487	1.7464776070896	1.69594709954768
MRC2	13850.4395133513	-0.374347389312967	0.000268854677111447	0.00239122111678196	15.7326452743156	14.4493297797303	13.0520679403371	11.3322041362132
MRE11A	1275.37556847654	-0.336078240017112	0.00364963645954837	0.0206911079149658	1.47356249935955	1.64685520074998	1.23724317663736	1.34811728898955
MRPL19	3498.18920993742	-0.524051613985727	7.8222764819526e-09	2.22348256019796e-07	2.94544336081586	3.15641283941685	2.2809684711273	2.15935583529188
MRPL36	675.731192185745	-0.375795988404696	0.00459822713678549	0.0247106259848863	7.39826531032192	6.97415557261681	5.62445496710196	5.98816784389137
MRPL49	1379.30987524177	0.474318137214382	4.94165105003805e-06	7.48505373950687e-05	3.11717602476955	3.05923565488514	4.44696904803108	4.54249822904712
MRPL55	415.364596320864	0.452723819392206	0.00706840697275977	0.0349207867832952	2.03430208063379	2.45480442139664	3.30384422716683	3.1055505697328
MRPL57	538.459055890998	-0.39277850910264	0.00616622010141184	0.0313473733752818	1.28086460513447	1.38468026107163	1.02160447534137	1.10199015604889
MRPS10	1688.61790544715	-0.359869838503636	0.000259818236011982	0.00232411388922453	4.98771770397629	5.27782094551866	4.17582108006326	4.19499072756567
MRPS21	1047.13696215664	-0.428477885579222	0.000130826458187599	0.00129314439925247	4.57767337929422	4.44573455314236	3.51310991213938	3.51157392372247
MRS2	1392.78797222133	0.385421984322819	0.000327181957161779	0.00281882931888889	1.48299802483872	1.63201694271554	2.1326501299618	2.12211643313338
MRVI1	6800.52734838121	-0.487738802645044	0.000116919609916307	0.00117556591303664	7.43709819740487	6.33076512418277	5.64336378635159	4.64225543392186
MSI2	2834.98747786939	-0.825909364093878	1.20032967245654e-19	1.48989592795358e-17	2.64681204626413	2.59808097079366	1.58723820488745	1.51138053278292
MSL1	3427.6929549235	-0.389901554308556	1.40529917721341e-05	0.000187008788041701	6.03990481347164	5.73455909227189	4.77501353937454	4.63881154710547
MSRB3	5870.84088291775	0.604195569302579	1.41931946204554e-10	5.65550419734395e-09	6.00083310239458	5.54551235072926	9.54582598859536	8.84235507784153
MSX2	665.391374539244	-0.367767711683119	0.00495235749670953	0.026261537334158	2.00952847437809	1.91682033269544	1.60572547364044	1.58347450989592
MT1E	2470.02001063987	0.783612220693672	2.63639123199433e-10	1.00483759293349e-08	18.8862249585842	22.5881897611336	34.4012677345549	40.2511685474572
MT1L	666.591478638961	0.357536431427764	0.00824787015658527	0.0397268636044866	7.45843232598092	8.43506818815305	10.4828798257582	10.7942651957908
MT1X	153.463647335493	1.20159678375399	1.83962021144481e-06	3.1087365163524e-05	1.29028340787874	1.37627030060975	2.97323749444736	3.43996865234443
MT2A	9056.52106097889	0.938872091806941	0.00338064656837854	0.019449117624314	71.5797148241928	100.079603423515	144.911965057726	199.404855732235
MTAP	1751.55110576148	-0.568829965054489	3.63056298946281e-09	1.12163604603977e-07	2.42752974692352	2.49247820561191	1.72145521876825	1.75095173346725
MTF1	2044.33870886421	0.326464460496102	0.000843473575293912	0.00616175019118355	1.28441049580073	1.34911202094355	1.66897816373828	1.78732657039497
MTHFSD	501.002197927864	0.378233550189097	0.0090460928462389	0.0426919576922432	0.74150804715474	0.792275224307847	1.04115364884906	1.04375790031118
MTM1	607.248846790848	0.362729253588369	0.00777108669048612	0.0378200076060924	0.8560761110481	0.934691106283481	1.2024171479361	1.20488479860255
MTMR7	47.701381119517	1.22024276533152	0.0051168886749239	0.0269385132656417	0.0269963914768688	0.0361017975187401	0.072373081777566	0.0802418498817703
MTMR9LP	354.503254970827	-0.758878234878829	1.63941964104829e-05	0.000214101488690347	1.1562159715753	1.06054872472553	0.733610983583591	0.639962764353475
MTRR	1346.46598540729	0.440793706885821	3.42911487232411e-05	0.000407254574083133	1.94373413604511	2.0658691309407	2.78156112826353	2.91277249478992
MTSS1	1651.75466219878	-0.411235325588018	0.00027603192068577	0.00244476324034851	2.2068793465513	2.00650934064516	1.7327634538213	1.58805109243718
MTSS1L	6098.52541854294	-0.471246081714362	2.66170721163827e-08	6.88752306966893e-07	8.40387235645275	8.06359954955329	6.36749429810378	6.07358320770759
MTX2	1122.32156424715	0.327816381614995	0.00279723589574917	0.0166105125629881	3.5900769587308	3.64371510360562	4.81003339632486	4.69558905358763
MUC1	355.008174219306	1.55315312728756	2.08399580790734e-16	1.78232470742124e-14	0.496316849494161	0.645655464301125	1.77876080402917	1.70591133909249
MUL1	1227.34868616809	0.431536062458436	0.000421147248676601	0.00347675768683815	2.25958325884766	2.66719957460019	3.36562149723172	3.57688385364155
MURC	221.714011430048	0.600215333675926	0.00442723678617851	0.0240059651462172	0.298656869157855	0.361862114790657	0.51313563659692	0.530786586063953
MUSK	47.3363237834005	1.101971207931	0.00979711787073587	0.0454327787376971	0.0623683293590584	0.0625530489889378	0.135604085990183	0.145274025327658
MXD1	961.307833594057	0.923748935773339	7.52764158797962e-15	5.38687249556133e-13	0.693936507893541	0.672348744148073	1.32040565838356	1.39620739963501
MXRA5	11407.7632702362	-1.05617177533965	3.57442734483951e-29	1.06670038167487e-26	9.53657541920842	8.65542847246463	4.75843934787069	4.40530522622916
MYADM	16327.6079291817	-0.589295539984017	6.42366668377507e-16	5.17806602911662e-14	26.7282667548094	27.4286935630889	18.9695074068848	18.7163601532201
MYCT1	33.8007717954134	1.61573646430872	0.00517755371969101	0.027178281613917	0.0305897901966463	0.0327257489288166	0.0684424879860965	0.134607210319872
MYDGF	3561.03863902436	-0.349520198726354	0.000399180562814989	0.00333665469251671	21.6400597017549	22.2904308289619	16.8623841381552	19.2407638523513
MYO1E	4107.65567026138	-0.353690964430461	6.08029228234728e-05	0.000671513224820495	5.38106256463871	5.049055242272	4.28047848310508	4.27130090562643
MYOCD	389.986388808183	-1.68302487737119	3.11981647602068e-20	4.33252929630357e-18	0.35868707867317	0.445750124898596	0.136866761912737	0.124697700895968
MYPOP	222.713322480386	0.702249711517966	0.001381010364584	0.00920662281219793	0.532758400073483	0.505750406681449	0.975373566481098	0.795920712071556
MZT1	767.946610417916	-0.528689984338035	0.000136733297985129	0.00134301207110603	2.00937466431499	2.34648278128266	1.49602294488372	1.65980414082251
N4BP1	4091.76057014412	0.348030483544363	0.000545729022940248	0.00432100240938307	2.88275353135633	2.98033969630679	3.62410475371934	4.19008262395055
N4BP2	642.170900613462	-0.582252728815656	2.87349508959561e-05	0.000350466453275374	0.47765114555611	0.434625192076532	0.32961810598779	0.309360837007236
N4BP2L2-IT2	809.043374136912	0.511706099676146	5.60567734497843e-05	0.000627495853476995	0.74366261348438	0.836658756258721	1.16481712725272	1.18965921953701
NAA50	5786.32605780116	-0.999352843132787	5.27255798907252e-27	1.2750499716333e-24	7.31782997957596	7.16841016886985	3.99588732620687	3.59152635075041
NAA60	1792.08930620336	0.332334957545747	0.000768531961333479	0.005730690744106	2.65479324114345	2.83570081990569	3.65181060350364	3.58033142538358
NAAA	468.88172891732	-0.589013629680484	8.02165610357038e-05	0.000859524434749261	1.30798217660508	1.23411647704717	0.894213661342157	0.877430628055434
NACC2	2420.4908810726	0.606004134388961	1.07515390171907e-09	3.72348361123746e-08	1.58941605721944	1.62990934866136	2.68116041389996	2.4476952027117
NALCN	134.300720149738	1.19467128949878	5.56841719401336e-06	8.27358258085079e-05	0.0681249901217969	0.0683267595629564	0.170008731591799	0.157072993822785
NAP1L1	12835.1950319498	-0.527433538360786	9.31032302992338e-09	2.59615488703192e-07	14.402484042241	13.7361542208252	10.7746490498373	9.66807979988083
NAPA	2668.96128623793	0.659254931813608	1.66177301325548e-06	2.8459130993799e-05	5.99879381218544	6.88435539906676	9.27035443551415	12.0203575428857
NAV3	11977.0932614646	0.346373302720918	1.22232616183496e-05	0.000165008149623649	5.99407820961825	6.42714647251221	8.09583152250636	8.43403500473996
NBN	2132.87431959	-0.436763105934709	0.000125473777593344	0.00124638470575372	2.90446431693086	3.10586569741405	2.13056574137425	2.51763577654939
NCAPD2	3507.05069880465	-0.421403557462982	2.43210187417456e-05	0.000304305627896275	4.54254523037332	5.13013963111121	3.62204291362754	3.93473083152773
NCAPG2	2375.87323194805	-0.499911237052323	1.26487472289967e-05	0.00016944730528549	2.38045514262702	2.8342606694401	1.84383675850525	2.01253158546467
NCF2	164.917424936567	1.60105718384629	9.12906964117117e-11	3.74398628032359e-09	0.201546732345361	0.176355789277286	0.590386501988719	0.615892754114932
NCKAP5	9497.99614693495	-0.475807663965535	6.38907491775023e-06	9.27672513419924e-05	8.82306949999085	8.00474196163198	6.78179263366736	5.89150797889613
NCKAP5L	3044.7880225832	0.437521024941637	4.34950817972009e-07	8.70273919097775e-06	3.0040405888467	3.10439292796569	4.28204920151594	4.37772898608802
NCOA7	1963.10980484417	0.545599816802837	3.2761421515841e-08	8.33959524829738e-07	1.30414284741088	1.30741858465673	1.92205634406629	2.07024069218356
NDFIP2	3168.9553859081	0.478383929913592	9.78406812030332e-07	1.77991361161316e-05	3.27679584955409	3.30521979409561	5.05055810471846	4.5494734417105
NDRG4	481.665664127926	-0.589771753904033	0.000755231191720458	0.00564351235752325	0.865134519022736	0.685302436027574	0.568501715009715	0.513533547667457
NDUFA3	315.015072928048	0.479190224079937	0.00606531492607998	0.030924066576953	0.415462926209219	0.445410693459837	0.626644887999571	0.628134388947865
NDUFA7	362.812765481366	0.850653370925726	4.39120503374249e-07	8.77365267852879e-06	1.73371242649368	1.86074069706262	3.47872466884371	3.29764608207578
NDUFAB1	1030.75440426265	0.327458219930642	0.00398633202125136	0.0221522555190458	7.74077927685201	8.12451879756671	10.1735280432799	10.6591526091046
NDUFAF3	1694.80043447104	0.487203031340513	6.74697500774848e-05	0.000736444135865215	4.3560645129779	5.31490063431851	6.83703961984539	7.32743623024953
NDUFC2	567.996571011783	0.700889347707149	5.7535643182376e-07	1.10547250859727e-05	1.03803579445967	0.982432492228416	1.72213325843259	1.72197649657021
NDUFS7	750.155037143134	0.440182912938261	0.000906064702017376	0.00648721976033472	4.50027964325572	4.87786447662846	6.3039443823111	7.00426205005461
NEAT1	279703.520021125	0.435297023963711	1.41126885969907e-06	2.45284473682022e-05	63.5963705677238	57.3497737248199	88.2826395577111	83.0039946172844
NECTIN3	12898.3347826757	0.455466467417548	7.57685857637483e-07	1.42076227797103e-05	9.52663695299207	8.86521451251964	13.8175328005835	12.5959963616962
NEDD4L	3548.20437552118	0.913056795988957	1.27684930886715e-23	2.32585563716502e-21	1.43676633215	1.51166631324678	2.79320853096789	3.01804103853111
NEGR1	1687.49917825455	0.461531194226973	7.12602616002338e-05	0.000771811914443922	1.45809210853298	1.43898862633845	2.24104779457456	1.93624374626958
NEK3	437.544694264702	-0.508163431959726	0.0019660496739796	0.0123880560320026	1.11674440213729	1.05630913157325	0.862759472351642	0.738401926252288
NEK7	4970.53836679322	-0.828333157975522	2.22223747157099e-20	3.11691027762547e-18	8.72124937427667	9.0880052901442	5.47179501854959	5.02618323575968
NES	9827.38929929828	-0.973978050827245	2.3511363409442e-31	8.04318007758129e-29	13.2252446374911	13.8904008557123	7.48485420846627	6.9643973596291
NETO2	263.317192582852	-0.590568822769807	0.00156650792835753	0.010262419525055	0.499208473741662	0.492257932103087	0.335843972392055	0.353968073146905
NEURL1B	565.344974914503	-0.642200115065072	1.22648820840744e-05	0.000165141892952029	0.593087417642926	0.650802675880439	0.44024951312538	0.393054323315706
NEXN-AS1	182.799266336755	-0.642719064172575	0.00390079604933295	0.0217978348159139	0.573995436082015	0.550350385636239	0.397285323035006	0.357425602969782
NF2	8154.32217308343	-0.391877105260984	4.58568526723263e-05	0.000525051604556774	7.31415238566775	8.15490023350898	5.82408992719827	6.51559039625956
NFATC2IP	2123.52629042014	-0.350112243389335	0.000887083820027045	0.006399936983201	3.44222093582797	3.6976342753041	2.75820866697347	3.10425314098188
NFE2L3	4105.61295841192	-0.455029473561234	2.68954057578802e-07	5.62198153740727e-06	7.63077350251602	7.16909647437548	5.69861902438716	5.61235269568859
NFXL1	1247.96914290411	-0.467317545632334	0.000107598276257238	0.00109837949256479	2.13781684963952	1.8952473777983	1.57871722837371	1.48016047098303
NGF	357.934711329553	0.966191262624793	1.32701798791424e-07	2.9497233436585e-06	1.22456558211997	1.45563548889669	2.53487262568977	2.92857298143497
NHS	169.701278293629	-0.907563901438732	8.32396322050574e-05	0.000885154724266971	0.135245220181145	0.14541591500075	0.0822190852423566	0.0742313651551602
NID1	10965.1693752728	-0.522557528355719	1.48417190823876e-05	0.000195675821959151	13.7229148562826	11.6966436990072	10.0666719818268	8.46989802582455
NID2	17619.7116543608	-0.483055597701828	3.55678103061521e-11	1.54929847004375e-09	23.1426671773557	23.9619747430302	17.7335827602234	17.5483251393848
NIF3L1	503.099736898182	-0.52701300708277	0.000428876799446339	0.00352833659499789	1.90092574428944	2.05082927279058	1.35562321690195	1.51333648153955
NIP7	861.725305981394	-0.338990646048319	0.00467009266228057	0.0249914993060463	2.31741778175161	2.48710635055772	1.96747598169894	2.00603550851771
NIPA1	938.374647323995	-0.760970486580471	1.1120891730417e-08	3.04651616036776e-07	1.02469963015545	1.04788619567971	0.69465887098617	0.585393594543695
NIPSNAP3A	973.593925449016	-0.593671817878173	1.70970316901648e-06	2.91376629995445e-05	3.59962988553184	4.12807352011441	2.61079817704685	2.74240139988012
NKIRAS1	400.350383335768	0.474056043201802	0.00448341906787665	0.0242329232547352	0.94251206901332	1.00250014250976	1.31345031881395	1.51299934169404
NKIRAS2	2172.74026902842	0.647903095222704	1.70754178329821e-10	6.78469718202286e-09	3.90997390111504	3.79499985362823	6.01768155645479	6.63223733113908
NLK	1583.32532051676	0.343247977807335	0.00141299680073474	0.00939555325367369	2.37666876342896	2.18374615284181	3.08708084368724	2.97843363989705
NLRP1	2037.89144794214	-0.432662929273886	7.68195145672636e-06	0.000109833895139698	2.27713427611157	2.16209894232289	1.71297410159206	1.73337143188053
NME1	975.48351062396	-0.483734146812314	5.89424600361522e-05	0.000652507454196583	6.66911623522673	6.08518002075121	4.79182326394617	4.7722533447924
NME7	654.250099621745	-0.34212352800388	0.00972361121025674	0.0451750151821997	2.54132620067259	2.42817558202182	2.09164062583203	2.01699161816891
NMI	572.902826371041	0.494922474296526	0.00937310004899456	0.0438662333290616	1.77064488266227	1.95263635275272	2.25964493214723	3.23108878411494
NMRAL2P	122.95113986173	1.06502541109963	0.000144825682538657	0.00140966344433533	0.18909179081299	0.237543711426751	0.438285299497214	0.490782458002104
NNMT	4033.94116116645	0.396237774527593	0.00381996373988308	0.0214377942870613	13.862428338766	11.6539475096484	19.5581626474557	15.6301381344306
NNT	2718.5507599394	-0.475184147991806	4.57960888406522e-07	9.09824280565139e-06	3.8032969150933	3.74520568298563	2.94448006178303	2.7420419006205
NOTCH1	2825.84505905883	0.34094323673279	0.000281226857583477	0.00248549962474218	1.47639226085268	1.6256757255577	2.07147315297441	2.0383442997645
NOTCH2NL	775.260502666659	-0.441252329593094	0.000728025637384576	0.00546058159890698	0.99775269499807	0.941475867302074	0.782383512177654	0.714410034485862
NOTCH3	2858.25255213404	-0.626040339646931	3.12196393388222e-05	0.000377488501177862	2.68109246255311	2.28777320167488	1.92815819887929	1.44458539205483
NOX4	228.280211292185	-0.699947604236223	0.00146302450665136	0.00967942534447736	0.317144287695082	0.289938012609074	0.219627197286632	0.172179562107062
NOXA1	24.5484757046131	1.83332729401354	0.00425304253054145	0.0232929225042461	0.0494019804200503	0.0254093830349023	0.130504587098	0.15527736369066
NPC1	1523.23732127702	0.63464105079089	1.87175256459411e-07	4.02656464279094e-06	1.55334581830654	1.31014030315565	2.2990022888753	2.3672472271472
NPDC1	663.983365824821	0.516383474599871	0.000550339624168995	0.00433899020157073	1.86007011598276	2.28648860874529	2.96696060394228	3.22321302678107
NPIPB15	96.940810736829	-0.845198084353019	0.00428308835275171	0.0234300301231262	0.540982349653014	0.496248179707149	0.310570231449141	0.29510788256727
NPPB	112.192940034042	4.16737599810966	1.48997089843191e-20	2.11094260822282e-18	0.0711249142833961	0.130781876061877	1.49884807234642	2.18665317461548
NPTX1	28397.3058000167	-0.466902863755819	1.47462900506824e-09	5.00802576878623e-08	34.9054902927429	35.2156906760201	25.5831574306261	27.543911549512
NQO1	3611.84303496074	-0.470937860201803	1.35474311570616e-06	2.37223807002429e-05	9.51029246834188	8.94896434204237	7.28643654121197	6.66434729584448
NR1D1	1348.06379226374	0.47638490320798	0.000150603308227106	0.001452793673448	2.11327498695815	2.59577495686659	3.43321228311173	3.40902143949609
NR1D2	3830.1594611759	-0.522608691292365	2.68907701962779e-09	8.65068676084847e-08	4.55547443446151	4.95235530408733	3.46656450910503	3.45900238596101
NR3C2	356.971607139514	0.833408374466385	7.10130786365333e-07	1.33516010852013e-05	0.25146660839659	0.251859631291393	0.455771851998071	0.48366213423229
NR4A1	1031.25908385408	-1.71460637228966	3.95965472951488e-06	6.13680853438405e-05	2.87770825819424	1.75363288884648	0.793734364260455	0.686542383177716
NR4A2	107.067057602928	-1.41530953431029	4.7956016174232e-06	7.30326908642539e-05	0.295256016303036	0.213872021927815	0.0987629523740016	0.102193904445825
NR4A3	72.8837684633574	-1.50125990202895	1.63597366206633e-05	0.000213850573943545	0.105213820079419	0.0920471105916551	0.0383734732161437	0.0347700506771089
NRAS	5550.23769997198	0.335394086339775	2.22540938553102e-05	0.000283145159061407	6.3575157932433	6.39078500948649	8.46796876057556	8.37424067433976
NRBF2	1042.95430958076	0.859014703927973	5.08572470241312e-14	3.31778486865332e-12	2.26223808440812	2.24820242876777	4.35176098905606	4.21706879968902
NRDE2	580.785413291485	-0.371405709038414	0.00620123288055754	0.0314683402252894	0.92233582734436	0.968527108634705	0.760948844709538	0.768535079901824
NRG1	1493.15668343973	-0.899948356516813	4.15995451902352e-19	4.82210926312595e-17	1.02650694556029	1.05955642980038	0.585172019055372	0.585066345296997
NRGN	211.814803966791	-0.940748518987755	2.49323113248722e-05	0.000310293343959768	1.1718384379163	1.47850482456995	0.679998738897721	0.760671776435222
NSUN5	529.45177876312	0.443689396694159	0.00191476100706258	0.0121632417957698	1.0499136049398	1.07167577513155	1.46076945015699	1.56033835019382
NT5DC2	1864.64686802219	-1.03574070392214	3.74658536540469e-21	5.53153750896486e-19	6.4370458440517	5.8442571515546	3.25294371445192	3.02496297835419
NT5DC3	2546.8825974221	0.504550929545273	1.64977625781834e-07	3.59313071306834e-06	1.66625196421754	1.71173721857613	2.39422237992686	2.62336363954031
NTAN1	1463.48614510391	-0.328711479513021	0.00116499578174034	0.00798252605505127	3.82571374206446	3.90767545737512	3.17072422632867	3.27620588579398
NTM	1934.40850557692	-0.54579618405227	8.21429470234757e-06	0.000115909152409585	3.35268145083457	2.99030976936492	2.44663286849899	2.10665759724098
NTN5	17.5491854400042	2.6030317717871	0.00103616560993723	0.00723767870765917	0.0129961230811022	0.017379485862197	0.0963628230340226	0.0944624807848711
NUCB2	3104.89546644861	-0.484628306022197	1.03529375291877e-07	2.35731009390238e-06	10.8748103277034	10.3324123359648	7.76676649764306	8.11318631065145
NUCKS1	17247.1441469616	0.326086742953702	3.02826763028587e-05	0.00036742631299645	13.7793435664312	13.6137782347628	18.4673415544732	17.4895248324459
NUDCD2	549.784310684512	-0.636825327197316	7.93863301033286e-06	0.000112585709406399	0.413523646169065	0.458651948346099	0.296585309027675	0.289811999166211
NUDT11	577.339472299712	-0.45701999295172	0.000791024643580744	0.00585348851599617	1.5980322587006	1.62787609124523	1.24928333464656	1.21093586481937
NUDT15	628.63452683611	-0.685172611894526	2.3873904322602e-05	0.000300588314208991	0.891013759382156	1.00404511782962	0.542030170682239	0.690878720774166
NUDT16L1	451.84492317627	0.441460952323977	0.00503055382495811	0.0265557199656991	1.45089816341348	1.6772733741339	2.16252032848071	2.27332032649423
NUP50	3177.83180072498	0.382137078530945	1.3748950170315e-05	0.000183485038143519	2.83038952317884	2.97492188191612	3.87849783167606	4.04039352042781
NUP85	1125.24302546425	-0.368890176850665	0.000827420220248195	0.00606659488196612	3.049304907359	3.12466997340478	2.43091933053622	2.57457491916196
NUPL2	579.491881430939	0.456896671177217	0.000865788986808571	0.00628676169279723	1.54364218182424	1.6024766061336	2.28833128611635	2.23056421486055
NUPR1	1374.0444904849	0.427508785429072	0.00306807484261803	0.0179527817031959	8.3762649532671	6.46061424827998	10.106557126225	10.8487124647013
NXPE3	2918.04088217767	-0.518624034280006	3.10491188242928e-08	7.94698796769216e-07	2.22438200183689	2.16703163991015	1.66122465988135	1.5491281699906
NXT2	214.25607456245	-0.878908528326525	2.27319240029479e-05	0.000288019842877459	0.520973211070584	0.562386919871549	0.2939413223471	0.322237377727983
NYNRIN	1693.0011956309	-0.477150950575139	0.000365390874497981	0.00310040677901312	1.54410631891911	1.35512764063541	1.19469296063945	0.98804630944406
OAT	3198.17091223798	-0.332002690504344	0.000113926320206497	0.00115041797495776	7.8058179545679	7.80851218497149	6.56926022166673	6.41988545765817
OBSL1	1291.10178424695	-0.350924639186648	0.0105255244236202	0.0482454266554566	1.2095683790514	1.09052391769544	1.03794036722799	0.851929276411854
OCLN	456.716630988189	1.01879180182083	6.47328600914669e-10	2.34610619029177e-08	0.257625017418611	0.273847152726004	0.517788982954256	0.60879677427979
OGT	7512.12262872503	-0.742388331508729	1.52469413676714e-13	9.50460442768707e-12	10.4993419104568	9.33566410918656	6.47095812789828	5.94994778923999
OIP5-AS1	1312.30641556408	-0.415328989362216	0.000297455021798534	0.00259782324766266	4.78693392542853	4.36843103785717	3.708064780647	3.48859304482556
OLFML3	2194.24155643518	-0.512007422971786	0.00157956853868431	0.0103238715394157	8.00302550950861	6.10325924834613	5.81540888100322	4.55552717159452
OLR1	925.770540360152	1.22738148747952	2.1705230103433e-16	1.84507610564092e-14	1.35902721500226	1.18411562607809	3.413165789548	2.83546753675492
ONECUT2	19.436791407433	4.30561163543275	2.43960432322524e-05	0.000304972283757195	0.000384918048084996	0.00102948821476232	0.013519258809104	0.0142157550368606
OPHN1	1488.46962211891	-0.376337513632335	0.00089624790639845	0.00643994525366018	1.24014093755087	1.34436588620673	0.978861595986989	1.10463136203968
OPN3	3062.96500007686	0.839730772169961	5.67540858224774e-08	1.36540790350955e-06	5.34270521109378	4.29754340137095	10.2611530491524	7.82395216500775
OR10Q1	146.239046633522	-0.884943065700715	0.000501077050753013	0.0040114764348526	1.02928793505393	1.08835468841955	0.66323719391178	0.536064546016259
OR51B5	336.487298214992	-0.641182234532726	0.000213057088121582	0.00196085217716096	1.28348475102923	1.1671394125037	0.841476695562978	0.806834571336723
ORAI2	2268.72238287897	-0.635606000372195	1.35636986915846e-11	6.40553662788435e-10	1.46143573874222	1.49301454545761	1.0210282138479	0.969758472584412
ORMDL3	2483.11959388174	0.360909077059866	0.0017812485056596	0.0113977151187872	3.58559505742533	3.03979444867814	4.5867636454446	4.33620920818065
OSBPL10	696.811559524358	0.350912374014366	0.00900523612440925	0.0425851118951329	0.863164058850847	0.817460803979971	1.16919992541193	1.07757923003102
OSBPL1A	3414.74487122742	-0.565910421624717	2.77742022107428e-09	8.89408584949495e-08	4.87960095489688	4.80837203364319	3.59057884527321	3.26222596472594
OSBPL6	789.103847297242	-0.391095884571122	0.0019615291661614	0.0123762519498785	0.662424087688902	0.727819866229877	0.53975436837105	0.568913316782781
OSGIN1	308.331864721002	0.809200014162908	1.48309735696772e-05	0.000195675821959151	0.636558817254658	0.70153996797353	1.13847211543289	1.31207833090181
OSMR	21540.8113022911	0.354984713075689	7.49974981388093e-05	0.000808543358105257	17.1925599710809	16.0200420440258	23.2050949196486	21.2815257536129
OSTC	3665.44994847681	-0.912231296010638	2.31165899625433e-27	5.78988019311844e-25	23.5566858303582	24.5287229338306	13.4163262394004	13.3294175183905
OSTF1	881.44544815288	-0.5117553413213	2.35545294122299e-05	0.000297367983380681	4.62706027953584	4.50013526536919	3.45648080930171	3.24963300491377
OSTM1	3141.71279141065	0.599112524327801	9.33776262020857e-10	3.27428646277613e-08	3.02572263795185	3.45175575543136	5.11890810510007	5.14157227106153
OTUD4	5875.84822222867	0.522108597183423	3.79414887615377e-11	1.64757684634467e-09	3.68131706767663	3.82785280168868	5.61426388011261	5.67393741060884
OVGP1	108.208931595873	0.955535231332253	0.000819177357641586	0.00601761689492129	0.190985622308036	0.188775169250291	0.375900518887355	0.395846463949139
P2RX4	605.150827815339	-0.374497494264091	0.00666778045121685	0.0333383394825159	1.88165603706531	1.85680568974511	1.43655362720777	1.58468425952446
P3H3	4183.30827729875	-0.322971541122635	0.00015390603240536	0.00147985160246765	9.97734547948662	10.1559744432564	8.15346633699805	8.69960808455886
P3H4	1340.74963889406	-0.41908089106047	0.000178425614965447	0.001682984314395	3.50111160498087	3.31693031482207	2.55019012736283	2.79422478970401
P4HA2	9190.73714693538	-0.324515745723624	0.000190898864165708	0.00178094454673842	22.3999832170993	21.3005195334341	17.4974787214221	19.0599585935597
PADI1	18.3386440483266	3.01275030822103	0.000937222785053408	0.00667283593053761	0.0112917965683868	0	0.0579155160669916	0.0456321892016084
PAG1	7361.29490780524	-0.674939629026299	3.64328657737984e-13	2.13810617298451e-11	4.66853331183571	5.0836613896704	3.02296063367177	3.37115590930975
PALMD	34.6921342781937	1.31177094476396	0.00984818630963316	0.0455876769567376	0.0385144997438406	0.0515047602743154	0.120242042869615	0.111598944914842
PAN3	2821.29005206716	0.375213515583813	2.6703892243606e-05	0.000328840028629339	2.5529986155773	2.491674237952	3.4623455525372	3.39142264337756
PANX1	3874.34483561252	-0.776682174383216	1.63562258577909e-19	2.01238968316996e-17	9.96759914626885	10.4873079256497	6.36059311208705	6.13590149288957
PAPD5	1313.58894290645	-0.535262934007124	8.81531193787439e-06	0.000123396771697232	1.0243298452505	1.19488250185707	0.769634027177195	0.831352540339505
PAPPA2	187.265441043343	0.831202106795924	0.000521088911460218	0.00415272333644376	0.115322647730392	0.0862763300761437	0.188200966473445	0.190109412885626
PARD3	3198.87569507469	0.342154146721819	0.000458123257722281	0.00373366462104167	2.7562672840079	2.56281531411757	3.65493510925701	3.4101546263451
PARD6B	364.852023546232	0.638312004216052	0.000259674715439079	0.00232411388922453	0.325409968068639	0.392008143190769	0.566736703411592	0.598047550451189
PARP10	2773.46246854628	1.18302240087448	0.00326532426302416	0.0188708026836328	2.2364844995588	3.15241517591627	4.92984852392949	7.87350960376291
PARP12	2376.14402819299	0.871726683417212	0.0104673383550142	0.0480258056157767	2.25273551284243	2.87044230965447	3.87122717620195	5.94123216211485
PAXBP1-AS1	57.4475672900558	1.16088602935338	0.00436695023453005	0.0237549126334967	0.0535105397468158	0.0505120233276129	0.103183865661856	0.140983752021015
PBX1	1982.96696302503	-0.415340174843711	0.00216868127836427	0.0134354786264741	2.04607512723614	1.74918369496373	1.63344451826559	1.3492315372137
PBX3	755.812050327529	-0.612853231423789	2.73226269968175e-06	4.44063923820814e-05	1.63338113598321	1.77523833359155	1.10944856643748	1.22221856015519
PBXIP1	2511.87066905346	-0.366864091630183	0.0100904006849266	0.0464648984603336	5.64926716474856	4.35504229379633	4.32624721085934	3.80942788942416
PCBP3	245.682372102576	1.00228080536505	4.24845057863363e-06	6.54821624350718e-05	0.514797409377748	0.433919189500605	1.09094414561341	0.907105773248385
PCDH1	18.4324752819192	2.41806542824991	0.00395982446954505	0.0220661493880965	0.00994672109368421	0.00147795271579681	0.0396796064665568	0.0277901702754269
PCDH18	10330.6954430142	-0.912970856156521	0.000970209849228831	0.00686587454353359	14.334661266553	11.9895067701437	8.51514557194873	6.12520692587211
PCDHB12	124.975773833027	-0.950358445791396	0.00103497119643733	0.00723654337050346	0.316837701347822	0.241071521543635	0.167703337776501	0.135929903711576
PCDHB13	522.336947725928	-0.912261114034782	2.98955317642081e-07	6.1573381574858e-06	1.16920587753622	1.0826457197071	0.714841390547999	0.538718410642254
PCDHB14	438.397337850075	-1.70268199962291	8.61813547257002e-20	1.0792675726631e-17	1.02722825988505	0.929756446541607	0.359320953334961	0.270700836970373
PCDHB16	998.828929870649	-0.654731592206515	2.17498633596721e-07	4.64328133154887e-06	1.5993375473946	1.51801103924008	1.10293287347763	0.971602982300581
PCDHB8	138.464929862164	-0.845357691694223	0.00151066677696513	0.00996173587856745	0.39142970855024	0.367334762044961	0.250125404097319	0.192462113292234
PCDHB9	329.92674125197	-0.649491570606208	0.00204612124990845	0.0127834728958646	0.568241637256444	0.487163296757153	0.406186519051771	0.299519275924733
PCDHGA4	654.498627629364	-0.357449884220432	0.00873747283961766	0.0415993869818321	0.849514840996604	0.891512146936672	0.746297389272411	0.675518612692766
PCDHGA6	482.626975372672	-0.454022552773783	0.00446372279603779	0.0241611556419834	0.678366521563549	0.713924772570166	0.576457930943639	0.486789539016614
PCDHGB1	622.664198456609	-0.594204095924325	0.000866781694960186	0.00628943613735725	1.02351510942853	0.852532711881309	0.73691739317682	0.566471662790799
PCDHGB3	657.575556666884	-0.461286416940954	0.00218208221277892	0.0135029397967439	0.960134012113216	0.891452175549869	0.767710498457771	0.641700195872023
PCOLCE	6176.1904765731	-0.564013097888398	3.14935693889026e-07	6.43919539721208e-06	27.3760606804685	25.1930443186667	20.1538593948856	17.0866258989097
PCSK4	55.6913485852796	1.17437771110244	0.00352641896462623	0.0201390685658988	0.0642834500903947	0.0828949395036534	0.179189781329695	0.165971214401591
PCSK5	128.932037899722	-1.0988630351228	0.000899049984621658	0.00644686865250684	0.0956986275933514	0.0707952807740714	0.0512518639016549	0.0303994167401559
PCTP	591.202658737265	0.363674255508684	0.00791085254316722	0.0384069289617388	0.874061175612319	0.915736232118558	1.17176774209851	1.23803354306171
PCYOX1	6381.0642428792	-0.506987228788615	5.64029903472919e-06	8.34502471108773e-05	8.42500205132083	7.68598631318791	6.4333783699978	5.44038726737165
PDE11A	195.833724194694	0.68124995530192	0.00268882216184262	0.0160619334080088	0.085573297662467	0.0923961992249948	0.162274558825747	0.135978718923489
PDE4B	907.251077521617	-0.735292761725231	3.32994879104329e-10	1.2521678751521e-08	1.10143089377942	1.14592356113662	0.714451485116185	0.698405376781162
PDE7B	553.947315154097	-0.695586537189342	1.13723763139129e-05	0.000154562936219906	0.665837198769038	0.807225015329555	0.44685713668142	0.503290584913138
PDGFA	512.054254011127	-0.67915804477614	4.52963488947276e-06	6.95105677896554e-05	1.26014242949733	1.33926367585934	0.890361913537691	0.807795687509828
PDIA5	681.089248715548	-0.352523314335065	0.0065457583218639	0.0328661626305732	2.42626869250954	2.31757590740253	1.95612880858482	1.93795207625246
PDIK1L	300.532120119049	-0.590251711147323	0.00083485501854947	0.00610833411068068	0.45193311703496	0.456428747455949	0.323250964201715	0.308479385693532
PDK3	931.108988858312	-0.388718441453626	0.00386753459079698	0.0216335778763204	0.458715359078924	0.471287572807743	0.40411660848953	0.339292333026181
PDP1	4332.19400858802	0.533304558286513	2.4255353572779e-09	7.87512937990273e-08	4.4981196282002	4.70483606378672	6.6734114348207	7.26955207675355
PDXDC2P	911.467823869092	-0.383269549455282	0.00136180256634452	0.00910421486918412	1.47350770679764	1.37914864345848	1.14543789853154	1.14736622129796
PEA15	20839.7283940248	0.416108029356338	4.57386569449461e-07	9.09824280565139e-06	38.3391905844647	35.5158433610215	51.9723464520131	51.2517944804911
PEG10	2965.3042146925	0.778770610799115	6.10195187148585e-15	4.45760296611774e-13	1.7789276803455	2.03711409477925	3.45358780996209	3.39163740054017
PEPD	1930.80563925667	0.336450464566967	0.00138230509240431	0.00921055165133628	4.60638207296998	5.2269452218836	6.351972858062	6.63032114523935
PER3	1219.26999242663	0.68109745190711	1.39146411859959e-09	4.73705721540726e-08	0.830853382304807	0.866776683521106	1.4751968509661	1.37294064830071
PEX13	1607.24377543931	0.331658034382953	0.00170087313882095	0.010983631052073	1.86238185714544	1.78288889573048	2.4834334468053	2.32313070953502
PEX14	737.494524209407	0.402070064759304	0.00433528537614913	0.0236050903283648	1.8304894509216	1.98325701095426	2.42551622421153	2.84640801037915
PEX5	1289.69591354706	0.433432166605274	4.46288487631417e-05	0.000512665219288965	1.49349951878806	1.44885798467352	2.06632033674673	2.09727531814463
PGM2L1	424.022697684146	-1.13300927956151	4.37047782447831e-12	2.25368830757841e-10	0.392910218218135	0.398704351012854	0.20311634262833	0.174706151105072
PGM3	6174.13598945805	-0.327927521559045	3.42249812193851e-05	0.000406813208968724	6.27491477700482	6.22435453005483	5.26990442415244	5.15764655428294
PHAX	1731.59821489728	-0.42304550583121	1.7878991515722e-05	0.000231765928835043	3.05765830694315	3.24791373561073	2.42773609325694	2.49373320303251
PHF1	1691.84932985582	0.428892094363413	9.31618085195056e-05	0.000971514889438354	1.91712635241806	1.71398079852739	2.51038910650192	2.61663241023784
PHLDA1	12611.145497898	-0.761502579459621	5.09688326825168e-16	4.1323054751733e-14	14.568004497445	16.4865350502438	9.14637555349045	10.0264051587684
PHLDB1	6632.57305819444	-0.5003127440716	3.26083930913399e-09	1.02548278363034e-07	7.7776183102463	7.69318897559549	5.92288926227187	5.52916591577388
PHLDB2	3014.834340542	1.12616859613763	3.39600245799312e-36	1.76416038799302e-33	1.67507548353754	1.63242934215827	3.82785649112373	3.73526251195347
PHTF2	2827.28695083757	-0.953197636486235	6.5525277152662e-21	9.37813813615549e-19	3.41955437370927	3.12035317056189	1.82705657152931	1.71221741389281
PI4K2A	2334.20688500259	0.795286739132817	5.18295628847452e-17	4.84640966014291e-15	2.39659280226247	2.31697768320127	4.17949957938654	4.39182029787128
PIANP	91.3283265631566	-1.08311691957503	0.00306546962020869	0.0179527817031959	0.235139904016813	0.237887081196151	0.151608724872309	0.0819412284897305
PID1	306.437312328253	-0.76848443839771	1.09151264236558e-05	0.000148925645153887	0.711565023832475	0.731765609909996	0.445864806189397	0.441009626403285
PIEZO2	4470.96378550596	-0.698828937865043	4.33426287885284e-08	1.06466499367408e-06	3.58743105636114	2.99805972281371	2.30581108060495	1.94540177669111
PIGC	467.144718133379	-0.606709362877543	4.11611832867454e-05	0.000478315457149868	2.14301737566349	2.20745539678695	1.52408793371284	1.46614280311524
PIGO	1088.41371691264	0.340873433869825	0.0019756374310104	0.012442878584352	1.30924592750035	1.33086850486086	1.75949422140732	1.74128975530911
PIGV	458.00451895014	-0.56289498176108	0.000212448119078556	0.00195653139737086	1.01432431692126	1.12615245488285	0.745784231522997	0.768987750010357
PIGW	246.3683305313	-0.952232280337953	6.31593863180555e-06	9.18955967320587e-05	0.385273094444206	0.448976474014318	0.201901986784087	0.24868081625693
PIK3C2B	156.76830031779	-0.804265116365538	0.00186053226252496	0.0118402112133281	0.163177722093776	0.13965739888213	0.10252477860689	0.0794980276918253
PIK3C3	2593.46603968838	0.380800168198406	5.35720750856891e-05	0.000603535682852912	4.33575460393769	4.05975940373323	5.71448686070894	5.74219263088837
PIK3CG	508.415276575093	0.437477004863883	0.00459536438535639	0.0247106259848863	0.321287156113225	0.358606880112149	0.450848940847811	0.511551647245359
PIK3R2	2445.83651662426	-0.918346235697537	1.07078350324224e-22	1.76691875487948e-20	4.68321688090055	4.53276686593862	2.60451209095608	2.50313015539331
PIKFYVE	4699.20429152247	-0.351492357004391	5.1709567365941e-05	0.000585374004741475	2.98180382740093	2.85822175085017	2.45261647214963	2.34165515797099
PIM3	986.086800383188	0.440837737024465	0.000221974075368761	0.00202827907564967	1.92768997138976	2.14531453005777	2.83199168010687	2.94751099683164
PIN1	989.003513858356	0.323230115382158	0.00545138214389157	0.0283189207223049	4.15297040529638	4.5207776427862	5.62803939716342	5.72020261052895
PINK1-AS	506.866582823221	-0.405840860411449	0.00626810650323662	0.0317044579208067	0.751438001107305	0.752729667606848	0.62574136373669	0.56303065585975
PIP4K2C	799.207118486165	0.856785181009925	5.94444621948548e-11	2.50380788812322e-09	0.954270314307867	1.09308813534029	1.96659031521266	1.9056829767535
PISD	2170.81170220642	0.483051702661659	3.40555162038329e-06	5.375455222125e-05	2.79366147847046	3.0242017783648	4.03288908354843	4.47569952783443
PITPNA	2443.63521974192	-0.710668308441556	5.24884297068696e-15	3.85446447679871e-13	4.84725765047175	4.79095766473948	3.02901648457319	3.13926456923105
PITPNC1	404.793928843565	-0.839870344782875	2.10878510411272e-06	3.52116903217679e-05	0.454190722065566	0.490075842892862	0.244190895614681	0.307880507159975
PITX1	1712.3099896879	-0.429835041731928	0.00258212976472757	0.0155304254202697	4.97910216138679	4.55854141395367	4.18089763603685	3.23518274547054
PKD1	14520.7303476048	0.465136723743854	2.59774909347466e-09	8.39539833757503e-08	4.85504887951155	5.13078059325924	7.3608315514072	7.06785058558922
PKD1P1	3670.3460485478	0.437916610635415	4.53642996671589e-06	6.95387614351443e-05	1.35154002626708	1.5153869454852	1.97240853216479	2.09034359487423
PKD1P6-NPIPP1	2380.24217539821	0.381233391869884	5.51346034368189e-05	0.000619149677986246	1.0870528436769	1.16202139872255	1.49387898774733	1.57136122399497
PKI55	524.580234109465	-0.493215147636147	0.001785491978604	0.0114196582270404	1.1212991272464	1.02477949021587	0.861978776069279	0.736463956966599
PKIA	921.553792111806	0.656399709731425	9.45163790135441e-08	2.18760186805936e-06	0.926194186993311	1.04696819437646	1.61065679736022	1.6389775515375
PKP4	3218.00066883986	0.358490304958694	6.05426068866342e-05	0.000669165172728078	3.40523757767145	3.43358681228652	4.71761549383163	4.46236720169655
PLA2G15	1501.44190927593	-0.425797155153318	0.000372557930877831	0.00315740032537308	3.46632088910585	3.85220803782139	2.64320260263008	3.05686929635011
PLA2G4C	94.2233480069637	1.50057593102135	1.7657821029886e-06	2.99478352799494e-05	0.108786207520524	0.113149457527062	0.330195739437005	0.326733427257034
PLA2R1	505.520261064584	-0.764350778305354	1.20822532432098e-06	2.14242331212719e-05	0.598157412908655	0.512791983709385	0.352706889025938	0.333731200718219
PLAGL2	1845.81574493884	0.355307577388179	0.000355286361829134	0.00302913466384388	1.58981348470773	1.72547321270476	2.1862544133998	2.25020505830049
PLAT	7393.89492833575	-0.745128072579426	2.69670111154818e-17	2.6085468821086e-15	17.3395960698655	15.9146531175264	10.2524003612951	10.5337908143783
PLCB1	745.62541522044	-0.461909302386066	0.000991692022006108	0.00697916322160445	0.740510329298547	0.644827878389272	0.549068867474974	0.506102014361899
PLCE1-AS1	29.3796672916284	3.0436140387009	1.2333454107825e-05	0.000165857169047319	0.0132222630068742	0.0412577638454499	0.261438909083783	0.187017434508438
PLD6	149.909885603392	0.779290683033868	0.00694010736123593	0.0343721560200195	0.238400942317192	0.257623732998031	0.353348063793649	0.537396596471337
PLEKHB2	6281.33824593887	0.454655947638556	4.13459771198405e-06	6.38676954937095e-05	6.56644230443715	7.15002424763284	9.17795554894482	10.4984522382136
PLEKHF1	255.875992848848	0.732333271871826	0.000301637278784562	0.00262943721083423	0.670880948240682	0.606058350430295	1.03053187007269	1.19734493967824
PLEKHG2	3257.76678859485	-0.53388740128498	1.10976323084607e-07	2.51480941470804e-06	2.92212881537172	2.93896541617488	2.25079160711487	1.98718942626536
PLEKHG4	1090.92791257927	-0.790500411985887	1.16616413778832e-12	6.41436007710548e-11	1.59622602506096	1.54591704956587	0.945096343253345	0.958205234921658
PLEKHH3	485.692737039762	0.441369335203094	0.00325751835292095	0.0188412174919873	0.713907302503427	0.753035320597886	1.08163052816427	1.00196022831895
PLK2	5028.45230916943	-0.557861631104497	1.78102699369876e-06	3.0169908953646e-05	13.2334694726785	11.1614358962096	9.17500171511655	8.19075151583555
PLOD1	23154.1279528844	-0.594232671110903	3.24506355086185e-16	2.72546475235858e-14	51.2533374869442	50.339020576636	34.9611510645545	35.5100259992076
PLPP5	671.702443424163	-0.483037120565073	0.00386346212405583	0.0216323032942144	1.89124533980231	1.55541432899274	1.42260508098378	1.16474062407761
PLS1	90.9799174452314	0.909109861455349	0.00350800325822656	0.0200502256315753	0.0886950769143296	0.088455183615494	0.164265981227673	0.184279022461372
PLSCR1	4078.95551469833	1.29394740676098	0.00134574030022083	0.00903559284389537	5.19196587239704	7.19471394591196	12.1328573908577	19.6530594867325
PLSCR4	381.193984488056	0.527734367688552	0.00222836265544829	0.0137168198578683	0.488446801342765	0.498965561580704	0.802175696185036	0.687667155864012
PLXNA2	427.222530819996	-0.422925411075935	0.00538878471286186	0.028035272397107	0.246750868732673	0.248025599818761	0.191742148437628	0.194745437675081
PLXNA3	5096.48562325032	-0.352550485134978	5.74955814357863e-05	0.000640026210490745	4.65791291063018	5.1412145912544	3.96762401286267	4.06310723257476
PLXNA4	359.155805689075	0.876954214065797	0.000218498748053547	0.00200043305496022	0.0922069535823271	0.0979992355861817	0.140477835831542	0.225274473504258
PLXNC1	129.205388627089	1.09943251377418	0.000414764770397588	0.00343620240377825	0.0711413154693226	0.053582358737746	0.165938851657509	0.115658869323091
PM20D2	1021.50836333101	-0.616445414419827	3.98991368081795e-08	9.904872440204e-07	1.48624893142013	1.54918539654119	1.02747131721291	1.04477503286412
PMEPA1	209.620236434152	-0.910312221359529	1.39013177457316e-05	0.000185342093822843	0.28795470100307	0.285799139903539	0.167683244474217	0.152025504398914
PML	5896.60074207934	0.458252275274936	5.20419742587189e-05	0.000588189374923409	3.53779976677388	3.9263730399248	4.8510441815369	5.88334220724288
PMM1	971.409947175138	-0.611717842015947	9.76006682793738e-07	1.77785321206039e-05	5.5865349421406	4.99345274620552	3.52975237960597	3.73229378377788
PNMAL1	243.980020115396	1.19979749234153	2.66513798149499e-09	8.5933851329767e-08	0.240099506029589	0.222286727657118	0.545155820445382	0.569957895644764
PNPLA2	1384.93492606889	0.428797361426716	0.000117675268506334	0.00118062468960646	2.7640322709912	2.86539529061756	4.15299672913885	3.77727898976954
PNRC2	2498.79348741741	0.628042510022689	6.33358511420901e-09	1.85072635024783e-07	4.43958385580275	4.97784760349638	7.16091580288335	8.06388372433353
POGLUT1	1095.50199853087	-0.707590638046711	3.46850081448866e-10	1.29672367963164e-08	2.19181825987803	2.08427326605735	1.35090810451026	1.39323041157609
POLA1	832.549690289485	-0.523483823004133	3.4381323947937e-05	0.000407635206841728	0.976907911033114	1.06359271449078	0.709441003069969	0.775517412726164
POLD2	1830.23246977388	-0.420676863587418	3.94157365052478e-05	0.000460704266852172	4.97311186685899	5.52289377748515	4.12462465834028	4.07660062443857
POLE2	232.872504118303	-0.640398773106855	0.00379671629815905	0.02133523349278	0.756163886262538	0.934404259806991	0.505516944594528	0.626774606750169
POLR3A	2448.863385143	-0.374764402927842	7.21435587626427e-05	0.000779572846845013	2.35506007625439	2.46772328212807	1.87681054384287	2.01666689868527
POLR3F	408.790657784655	-0.613473164581023	9.56514106486562e-05	0.00099261228006133	1.17757792947969	1.28551360572791	0.833648844981353	0.849786621518549
POLR3G	579.707849422212	0.788814891765341	7.4741092848421e-08	1.75892377230193e-06	0.698961962055932	0.800818668568069	1.29897208962253	1.40722633351886
POMGNT2	418.570768347665	0.460961455018134	0.00592151044104488	0.0303674974208759	0.71865103140962	0.879870469203032	1.15402635825864	1.1408572971161
POMK	935.142500898717	-0.660441937202991	5.65614207331235e-08	1.36311080275394e-06	4.12945204739644	4.03430551439807	2.82612094917225	2.58387155812941
POMT1	1451.46756523215	0.322900883902234	0.00288348059314679	0.017007442724759	2.28542351379776	2.11756665307383	2.81941467359493	2.95516267452436
POMT2	800.125815247611	-0.466977452417141	0.000125619777739805	0.00124695187726716	1.07586647757206	1.12885537196738	0.821824851412712	0.847400811472573
POPDC3	337.767625111584	-0.734096407739676	1.32502033885926e-05	0.000177268392279772	1.24372761872301	1.31146455194041	0.788240939029439	0.819097000212317
POSTN	1107.50899037481	-2.00640212002925	9.62364562853643e-46	1.03831733527578e-42	3.22399977582053	2.84316562428181	0.86409182632338	0.718461718158913
POT1-AS1	123.781035303202	0.83315348186115	0.00551656045121603	0.0286151171925873	0.138865576449482	0.107827248064666	0.26455111938897	0.198290613197126
PPAT	721.436046226389	0.367708612764478	0.00496769281671787	0.026332902285444	0.935373315598131	1.03565680135872	1.35413892003474	1.30403656837146
PPFIA3	50.697188705381	1.41886252368606	0.000763393265304611	0.00569843211238024	0.0340250670712535	0.0332508193767993	0.098054824921299	0.090492401258
PPIL4	1601.22179903177	0.390273556335008	9.29945493056708e-05	0.000970525163393295	3.08813066318721	3.24219315477785	4.2987494184015	4.38367248283195
PPL	1903.53709076505	0.381255879855184	0.000185648472413453	0.00173709504607811	1.51709111512025	1.54985423878918	2.17716790787336	2.00430421825647
PPM1A	3165.4747385286	-0.443268856448123	3.98319172144817e-06	6.15967443054378e-05	1.89475082948342	1.80166372428731	1.47969894563119	1.36796331019215
PPM1H	76.5714816228998	1.2854685195557	0.000184093518227115	0.0017259997905438	0.0440471924397415	0.0388227827837995	0.105480314818701	0.106981396339768
PPM1K	1572.84880868495	0.586751083871923	0.000671448830231914	0.00509893951967126	1.04149431577789	1.16735949480388	1.40086655515709	2.07187527062909
PPME1	2728.04071444237	0.397426690953185	4.30961832149319e-05	0.000497913563239403	5.02308412335197	4.86174557593732	7.09383725952581	6.54363154649322
PPP1R12B	3491.84346388624	-0.66973178643281	2.06030182320565e-06	3.44842403010531e-05	2.23134187724124	1.84067215541259	1.4916849347114	1.19053501529734
PPP1R12C	2783.83634869117	-0.500020037831144	2.91750040907435e-07	6.0355251825482e-06	6.08216368606532	6.65015915348971	4.52168884212402	4.89933115895383
PPP1R13B	116.383503990136	1.18394343107175	3.01185446025524e-05	0.000365751261121559	0.08384320783871	0.0819997016456452	0.20999242885833	0.184865015288782
PPP1R13L	717.759559677147	0.465043852670889	0.000962770488165524	0.00682011053889376	1.00368265211149	1.19597440548558	1.53016796365608	1.64026796252736
PPP1R15A	5807.52681644974	0.501324840953958	1.20653058747752e-06	2.14212633164047e-05	11.8175552345048	11.5234633604069	15.8800939379465	18.7317285591634
PPP1R3B	1176.8030270869	-0.396505878257049	0.000295434937192461	0.00258500962511632	1.32077897554518	1.32008748818118	1.07715996339174	1.02369976477813
PPP2R5B	1656.19889813587	0.458276006501013	2.53883225544984e-05	0.00031457297893056	2.74176845710544	3.13540144533376	4.15660345558048	4.28405685828634
PPP3CC	1241.54318358865	0.327486457654556	0.00830505926901647	0.0399200689880826	2.57159124974583	2.85930661833563	3.30876220702897	3.81921956733795
PPP4R3B	3272.05607624617	0.560645620306347	9.66714105492039e-10	3.38132968669111e-08	2.69955125722806	2.7548917413993	4.36165402673645	4.05996631791963
PPT1	2174.18499205275	0.380916768613144	5.04648257397484e-05	0.000573133316458066	4.35188468141909	4.37471642929025	5.797112167994	6.10317267754718
PRAF2	771.525226266245	-0.448898378131366	0.000341954219165894	0.00293348616392711	3.85718077294113	4.02246074349558	3.11050445187079	2.93025753994329
PRDM1	590.665504531948	-0.62157572262143	1.46532332168478e-05	0.000193892687829724	0.719662121301903	0.816341624504392	0.501577692153018	0.542012572121117
PRDM4	2008.74786633033	-0.394150304507874	2.79346629613356e-05	0.000342492642216515	3.17915371728695	3.12365853612079	2.49173597951802	2.53190594738058
PRDM8	563.280296369691	0.40888841071127	0.00422805756369226	0.0232163729791918	0.639833423911696	0.688444317307342	0.881679980614932	0.962778683325454
PRKACB	3113.59498159024	-0.417788577126765	2.54583641283387e-05	0.000314607061906677	3.15571609711931	3.05833988407653	2.56532324036485	2.30611264006919
PRKAR1A	11735.3632276759	-0.482039103020729	9.76042676143773e-10	3.40546631233646e-08	15.2290295633132	14.9963217884285	11.6086708418089	11.0510983018693
PRKAR1B	366.374316998951	0.87864320199848	1.19833462025405e-06	2.13297479488368e-05	0.527386341659475	0.473893102070488	0.886700498888548	1.04667780164257
PRKAR2B	456.485561080292	-0.804150903934892	4.99563886227395e-06	7.54239296902631e-05	1.02212679842925	0.809242694950579	0.570212622017552	0.531452135964493
PRMT7	937.844424683884	0.353088424763675	0.00245763478401092	0.0148780129440005	1.5128397876254	1.56488325073693	2.00965360972039	2.10514101096878
PRMT9	695.492427021328	0.374391109640018	0.00654698833522185	0.0328661626305732	1.05186450260582	0.931487239706019	1.37836558630925	1.31997524112616
PRNP	4982.468111526	-0.772414267841325	7.79086170914723e-15	5.54693534682737e-13	12.8907488139138	11.6305055633175	7.8110421703958	7.22891042497594
PROB1	21.4618605881968	2.01882404149235	0.00330696628334101	0.0190817650725292	0.017179587493398	0.0127633105186082	0.0744924606173741	0.0539978566159912
PROM2	67.8651278555116	1.30388202212308	0.0003557913325304	0.00302995095936332	0.0491485313269279	0.0449700535596448	0.116090553516943	0.128056400897261
PRPF31	1266.94166880472	-0.426028295295672	0.000179869080193536	0.00169432083196409	0.368131706767663	0.40220015392362	0.286438764454425	0.313397065324984
PRPS1	5469.08885138921	0.826235757199228	2.42376185653732e-23	4.3584209999734e-21	10.7965624030009	10.3618332615232	19.3919713272714	19.9100768069875
PRR11	2013.58379452412	-1.0523229647126	7.00918443371706e-13	3.96414600271433e-11	2.12063882001431	2.74102119871584	1.10518294281749	1.34620108283681
PRR3	499.573174421205	0.390347240956803	0.00887989256291439	0.042077490907918	0.105736671190108	0.104134322866398	0.136800208084058	0.151438088214792
PRRG1	1922.25469085349	0.422583008708634	3.67130310573955e-05	0.000432356820832099	1.57280395646314	1.54613092688624	2.27863926399429	2.09956529768127
PRRT2	314.633428671313	-1.30574708451202	2.13800422867225e-08	5.59471031928303e-07	0.855341323030243	0.786220736774564	0.423576027204784	0.271935973869098
PRRX1	2582.62308478114	-0.743987197376447	4.04453050681991e-16	3.31746110459977e-14	4.62184403693397	4.56826253566817	2.9339401819004	2.81247052869868
PRSS23	16801.4128072593	-0.410564691345062	7.13284674356741e-08	1.69568319364875e-06	9.83425137702429	9.57135159806147	7.75273516276655	7.53564458680087
PRSS35	135.542210158073	-2.4584902683222	3.76542354606512e-19	4.43813703000919e-17	0.502452759297295	0.515882628115982	0.104081346202277	0.089816849249725
PRTG	107.315494915239	0.786372813293018	0.0060614122648816	0.030924066576953	0.0394513668580273	0.0356285199767464	0.0663821800718887	0.0696500176857103
PSEN1	3681.37702185155	0.401306914687308	2.44995496221143e-06	4.03322397887061e-05	2.93061508473676	3.09872808393739	4.13486952459562	4.19890820592243
PSEN2	549.057015491307	0.441194995831357	0.00222876318665919	0.0137168198578683	1.20170309103382	1.14116215045557	1.59763831171496	1.73790033715529
PSG11	129.847437254705	-1.13403506662044	3.21625770487011e-05	0.000385895898789634	0.698087276315701	0.582817655941265	0.279953685773011	0.333370856716467
PSG2	73.6217390580589	-2.00119151774153	4.2565555035594e-06	6.55350685981605e-05	0.277175379359984	0.571436848269911	0.0991535316676643	0.121000159814301
PSKH1	1989.5424508386	0.651713981534094	2.61630252441872e-10	9.99898071048965e-09	2.41736849577216	2.73206416434419	4.23267060016585	4.2249181914959
PSMB10	806.270371085924	-0.48007581903827	0.000578505649815246	0.00452292098344964	5.53326734372764	5.26299549750399	3.69280749346427	4.42066746893726
PSMB6	1831.28210622652	-0.741780163448136	3.8979278401868e-14	2.60344456602191e-12	14.9305632133404	15.4839360323359	9.24264179984464	9.79734963736765
PTAR1	7061.87065384822	0.469285159802156	7.72211035896373e-09	2.20591282881518e-07	3.44332934007851	3.37364506852327	5.04734024411149	4.83603846374158
PTEN	7678.73741705023	0.388206211567275	1.00549266602552e-06	1.822098208485e-05	4.30704660230694	4.37833692966434	6.07938208521137	5.8211905572488
PTGER4	759.399662660871	0.524044850771038	5.98111019058003e-05	0.000661601352784507	1.01338952717129	1.0977507853784	1.51669440286672	1.65825814570675
PTGIS	152.654151533091	-0.840430585618954	0.0042999757536985	0.0234527941817762	0.215973855147087	0.18810199382443	0.146091640977823	0.0905114884550593
PTGS1	4357.13984073271	-1.09859613024491	7.21540717518919e-28	1.87413520442969e-25	6.30586286407392	5.75242830741393	3.08276816502596	2.81605199039822
PTK2B	172.925883302075	0.635297464624531	0.00690286446478665	0.0342706865892951	0.171769258391904	0.153711696239067	0.281235471639193	0.249650652313635
PTMA	5029.03769528231	-0.502524027103348	1.452795726814e-05	0.000192598420267422	30.992254178088	25.4736538272847	20.276888513292	21.5090766274307
PTMS	4723.4006789865	-0.474284229484641	5.87093339819277e-06	8.64677516981068e-05	26.2713846813005	23.1524168323959	17.753217126692	19.5355840900996
PTN	1923.88005282262	-0.492993828162373	5.25604217765418e-07	1.02106991113265e-05	7.63359217360192	7.37024505695881	5.70102829875798	5.46686258383144
PTPN1	4207.54613099575	0.612192697810149	1.71100981902139e-13	1.05257121585939e-11	5.27706629086033	5.53557604999916	8.58286655539713	8.71629508892964
PTPN18	570.193514784997	-0.556240494490594	6.41326321565101e-05	0.000705509253825263	1.02666361519062	1.11508893924915	0.772266932887673	0.750916636383679
PTPN21	4481.48367849933	-0.403620698015212	2.18073962813789e-06	3.63266674872471e-05	4.78578834440671	4.71483919335027	3.8537580785671	3.66723351616625
PTPN22	41.57372788056	1.34501467330152	0.00691133224688193	0.0342780573178098	0.0254747486503543	0.0499648327811658	0.104717154723041	0.0920813203053163
PTPN9	3244.81920016891	-0.352663457997813	7.3243058342286e-05	0.000790844600699695	5.46317317679822	5.20641156793858	4.33029753029355	4.42390386580682
PTPRE	330.143333768136	-0.515097052881622	0.00902872238605702	0.0426386734635811	0.307461317430636	0.284314556567632	0.24507891937109	0.188909486561049
PTPRF	15157.8428610451	-0.992640701510992	4.67491874753764e-39	3.27852051764815e-36	14.3047427233658	14.7564664591758	7.79614742638961	7.49323125877423
PTPRH	823.674165860243	0.48106481672053	0.000112264774023743	0.00113773534715103	0.996885024094655	1.02888724315426	1.41926381301738	1.5406049624951
PTPRQ	507.257721896918	1.1248664219291	1.32534668135474e-10	5.29610044235941e-09	0.241578690077493	0.21502966034374	0.578265595975207	0.466713187711207
PTRHD1	170.993475335666	-0.723587439403814	0.00183272985447806	0.0116791771644294	2.29999569842654	2.00213500155502	1.32942214497665	1.40662685784125
PURB	4760.15273505425	0.527935531821758	5.91814592016766e-11	2.5002383938636e-09	2.4814405512129	2.47875084348671	3.75313972459049	3.73619564182087
PUS10	295.394696454082	0.822644290737689	7.29720565167212e-06	0.000104974980995234	0.304376623478889	0.29768412918064	0.534226916735586	0.581872584044041
PXDN	85611.6086447455	-0.647709174278769	7.78450360744493e-20	9.92594978163842e-18	87.520577808123	89.0320496271936	59.7683206593663	58.2166484199355
PYCARD	79.5477039650938	-1.24988210620522	0.000534060652964157	0.00424885690214139	0.682380524649724	0.998421110511661	0.319558200849191	0.416346992333864
PYCR1	1942.07928839043	-0.42614924806548	0.000775463660943469	0.00577010785591146	6.00851545516908	5.19301003909846	4.69174522675132	4.0466128729611
PYCR2	1006.37772840825	0.374549568840257	0.00127633945718312	0.00861919454868978	2.7366525637085	2.99428129587138	3.84799785635444	3.92086977487026
PYGO1	1131.10244964646	-0.776624925604987	7.27729516487839e-11	3.02882320423099e-09	0.944716715582194	0.989513209066681	0.625132256920648	0.556330304177792
PYROXD2	801.185108894324	-0.473158940848014	0.000101265437650583	0.00104131160446266	2.64453797514729	2.57199558328688	1.95850960004857	1.9788594659335
QDPR	733.936726784657	-0.884202973605265	9.73673039791939e-11	3.95050744834213e-09	3.16852242160618	3.49921175798049	1.76979665623858	2.00893205444139
QSER1	4291.30365235285	-0.534156621147706	6.53898064380159e-10	2.36380779664848e-08	3.13705282212576	3.15345438183124	2.34419787383903	2.20392130009413
QSOX2	2065.55890360349	0.536027761244772	8.19309142359885e-07	1.52408886349334e-05	2.02787329488372	2.28645260947884	3.10985647101787	3.43259220492377
QTRT2	720.014143888133	0.374003888827094	0.00499467826324841	0.0264160472550234	0.860524854459315	0.944534458407847	1.1687470913148	1.27724328735194
RAB11FIP1	1793.77674801455	0.431293188209323	0.00058302166190319	0.00454303434991897	1.19831583324215	1.04895793886261	1.70163689136749	1.47543029647496
RAB11FIP2	1541.97463328697	-0.729964213942149	2.12649143647606e-11	9.7471140156906e-10	1.6992349728147	1.77847900232757	1.15224151502145	1.04198488138493
RAB14	5090.72867684638	-0.469008650228746	5.68749252296594e-09	1.67942673951832e-07	7.68629978448476	7.99057015840828	5.96695195226024	5.88889723471934
RAB27A	963.369805997921	-0.682044044109628	4.13236663236884e-08	1.0204326476339e-06	1.75650561326682	1.95857502779151	1.25965039128053	1.16140199353741
RAB27B	224.174348320889	1.53145477590298	1.87662171699586e-10	7.39367870859099e-09	0.0824111574645219	0.1090219640049	0.255212255071694	0.320305720782166
RAB34	3006.8895723465	-0.442870925455742	0.000448688272550002	0.00366742523938598	11.4040132168517	9.49846501395802	8.60504868628341	7.51297317975165
RAB3B	34387.9692863974	-1.40798846722446	2.96034904795891e-75	1.03804639366679e-71	22.8836922104945	22.1048955408439	9.0455488513655	8.70741888922779
RAB3IL1	159.708129391842	-0.723920409902755	0.00293878621883812	0.0173045405144515	0.419751800052203	0.465645986503868	0.253157560088573	0.307345986258523
RAB3IP	231.261440947395	0.582030295941711	0.00364535949760209	0.0206752172718831	0.102597793224149	0.107163861660563	0.168209980944658	0.160285557035168
RAB7B	42.757177146022	-1.42985490616894	0.00747245004287929	0.0366335492140598	0.14798233365885	0.0745315671962754	0.0554999975861386	0.0317133587026456
RABGAP1L	1673.10252958202	-0.400383688722055	0.000291911417616926	0.00255958679886302	1.10463294782726	1.01328355715228	0.873815270375793	0.807947627303868
RABL2B	342.563003537619	-0.424990338192539	0.0107479307967853	0.0490195212038305	0.861104932704569	0.875551392117334	0.6869030664548	0.667323281997264
RABL3	1036.56398557848	-0.482960299499724	0.000120296470230303	0.00120347952314567	1.69085150655613	1.91278406561503	1.27355479910323	1.42283162428663
RACK1	22773.4172977964	-0.342805404099167	0.000773741389250564	0.00576340771408838	140.575571172901	124.97444890994	115.929538690969	103.38297297513
RAD1	1450.24592293189	0.519204681831212	1.30898155103848e-06	2.30170565145549e-05	1.47917642646061	1.46583268279317	2.29036918701462	2.12986900274581
RAD51	260.69800559171	-0.991479589985753	0.000381645687898688	0.00321499244352373	0.630822147818873	1.03219423729708	0.354255976327882	0.517855683972187
RAD52	775.252566408876	0.520679578293506	3.82011530610812e-05	0.000448001147855122	0.992969891242549	0.967740301024812	1.42364850038158	1.52417033044892
RAF1	25643.1014778449	-0.490341974348511	2.76152052187975e-05	0.000339466142330284	55.3771252943783	50.4206479771185	43.5397355109064	35.3208370631841
RALB	2195.0929895276	-0.845741527048436	1.16937872591099e-18	1.30199802698981e-16	7.13059509404952	7.30403447740211	4.04660376031243	4.36301102572513
RAP2A	2360.6761262208	-0.53375137900005	1.05110417467099e-08	2.88508554871533e-07	3.5883971784053	3.82753465887796	2.71182640798386	2.64851247010145
RAPGEF3	148.305342630858	-0.684879694029019	0.00611558025299246	0.0311237767157011	0.143814641320452	0.177236797089832	0.10344342173541	0.104882689268906
RARG	1043.91475975754	-0.335149772074029	0.00260260131851398	0.0156144512531584	1.93711741007968	1.99062483323837	1.64320424214331	1.61596048465959
RASAL2	5353.84889261178	0.57044032478301	2.60171271636118e-11	1.16960328716929e-09	2.1584865291222	2.35956824483568	3.47556207709825	3.54459775227749
RASGRP1	146.692285292125	1.05090721846237	3.36028356618633e-05	0.000400436170767455	0.106142759412383	0.11388436961908	0.223486863788239	0.253125692317971
RASGRP3	115.872179924601	1.70791155865897	9.59710004780797e-08	2.21032718014047e-06	0.0562764294386667	0.0627145626238358	0.16745899517278	0.238610120554265
RASL12	275.379779925549	-1.50685006960239	8.82820335604445e-11	3.63121349770907e-09	1.01546979892794	0.767001476441127	0.372435779256196	0.286298294803041
RASSF2	3231.25552315706	-1.27664819862527	6.69317790566258e-30	2.13360257510962e-27	5.19661870858977	4.50953643276353	2.19553027705522	2.00278469698578
RASSF3	4136.00028742394	-0.920229312502988	3.17455717588188e-25	6.85020599214142e-23	8.9708233096078	8.95936883218228	5.14032365959341	4.7799533063824
RASSF7	319.52800440419	0.7067633705924	9.69238511750542e-05	0.00100328703806739	0.377919418623344	0.422728544495343	0.715360384367764	0.64943409623268
RBBP8	869.377532475662	-0.377371298310416	0.00243171936804624	0.0147714577116572	1.50995392042497	1.69008777986502	1.25617631667314	1.3195518412874
RBCK1	4377.56967860664	0.447207751537288	7.11312113134677e-05	0.000771009559414759	4.65604012665597	5.31572445833375	6.53269990187654	7.69370274479045
RBL1	934.948660234931	-0.517803394821949	0.000646623918387008	0.00494253246828129	0.917566744383657	1.15035543884812	0.690245835737893	0.819042391759874
RBL2	3083.83919918622	-0.408133192184983	2.19113820772454e-05	0.00027939004092313	4.03348667897238	4.05450519956894	3.34645304467335	3.03472778081029
RBM22	1010.03015859359	-0.659712070331064	4.22649899624891e-09	1.28877120573314e-07	3.04727509993722	3.05276299352464	2.02741551284464	2.01620513525184
RBM3	8088.70782629288	-0.440908430028605	9.89880468636079e-09	2.74388605792285e-07	11.8806249602562	12.4405669432939	9.33182416543061	9.42363823624148
RBM42	1521.28562882515	0.378170321818184	0.000541829000293181	0.00429846920707701	4.20230739907911	4.74280893445178	5.94339553835153	6.21138391897642
RBM4B	414.574362451062	-0.491044018186147	0.00203079366967841	0.0127217114832109	1.59179602428961	1.44462263787576	1.1373293973888	1.1291664046098
RBSN	2167.99008796939	-1.10475314564812	1.08050183204044e-32	4.20975519338868e-30	2.39955302122064	2.49803703286344	1.19269364181987	1.19100978126725
RC3H2	2911.13137198708	-0.47756118001343	2.62554859823637e-06	4.29343259616002e-05	4.86045096707768	4.47355128196463	3.65396946947238	3.36973915767933
RCC1	1243.42419903565	-0.352694715448479	0.00108649991301	0.00752927261851694	2.69177959584412	2.63738147612471	2.23213815861633	2.13932439808578
RCHY1	1458.30384313593	0.602775390015464	5.60549666183512e-09	1.65870667044092e-07	1.49178226404507	1.48421620125644	2.40829871773976	2.32493970703133
RDX	5147.21537789191	0.459768078057815	7.8061578256553e-09	2.22348256019796e-07	4.52113055755169	4.51582351894052	6.48215319680279	6.53309044202556
RECQL	2720.09969413439	-0.476611458055294	1.5969141165338e-07	3.48883448574815e-06	4.67024744783478	5.02446041126422	3.63102273172928	3.65948797705855
RECQL5	883.440773659202	0.482165488125896	5.21799020275428e-05	0.000589271582800576	0.800690265757069	0.845075405125769	1.18168316943437	1.22354381467921
REEP2	701.316255045469	-0.835229694099222	6.6246961164776e-08	1.58023788655978e-06	2.31410997867883	2.27426985613532	1.50263916677281	1.1900253581666
RELL2	198.384073896703	1.1169435556128	5.67192124998523e-07	1.09277977269633e-05	0.281092104620007	0.279515017975346	0.594420996214211	0.679624591012727
REPS1	1207.67147525253	0.414904301124963	0.000235667281912982	0.00213807845802813	1.47305024328189	1.50735364130762	1.98247254378379	2.17789750204697
RFK	1331.95592361831	-0.416278606918535	0.000282278848319761	0.00249231788972465	3.07646126744947	3.43658948784712	2.64630077149476	2.45706759692067
RFTN2	164.661149989844	-0.800831582481347	0.00665155258900297	0.0332838660768304	0.45052252563352	0.325230308031573	0.281616916759024	0.186405546553627
RFX2	453.386810324334	0.511631046792749	0.000691210774779052	0.00522637322212991	0.511603826227072	0.540868873002274	0.773876303890436	0.795720238712658
RGCC	2731.00424735164	-0.45175196886173	0.00110144263355392	0.0076140139863121	16.9367165019751	15.9982245580228	14.3250440520511	10.8880705179038
RGL1	1230.18971190519	0.451294299676474	4.46002875009554e-05	0.000512665219288965	1.10557820996811	1.07497732446084	1.60541983220741	1.51809540129282
RGS11	84.8638464751332	-0.861786619143796	0.00724467516922945	0.0356289670138893	0.24475853822421	0.276168884320101	0.135315524106505	0.164279838998495
RGS9	416.968807831958	-0.504499783126217	0.00172996285743439	0.0111304857974196	1.13004840080448	1.06105094333037	0.850098955665158	0.768948749046936
RHNO1	553.450064143695	-0.895745691050311	2.39711878128761e-09	7.80092529613458e-08	1.73526461175931	1.64357459237384	0.880636325334848	1.02315358350119
RHOBTB2	970.624426388304	-0.409647534571456	0.000320231534330267	0.00277134632207041	1.08489617879244	1.11589998675474	0.854245970059057	0.880130185296694
RHOQ	4118.54648218015	-0.322474227120721	0.000218223812215733	0.00199922089493003	5.95971817263082	5.69508188551376	4.96293439445092	4.80008060227839
RHPN2	743.217027595185	0.363898820466296	0.00382108125749702	0.0214377942870613	1.05800072508588	1.07171035163828	1.46224037820397	1.40723768419318
RIT1	2621.68249425778	0.397659563716042	2.50671697665732e-05	0.00031114347181058	3.61000826249161	3.91452823547397	5.05638558875829	5.31476777802899
RMI1	918.381880588634	-0.433944406323857	0.000614020554919676	0.00474765838109337	1.62689589995515	1.87160250296762	1.31414934181336	1.39283166217381
RMND5A	1428.11713474745	0.661057688250004	4.01414181145086e-10	1.48164086966868e-08	1.04180226824081	1.0281105687185	1.75785436313807	1.67038929985663
RNA28S5	488.347026679428	0.61380349769238	0.000443493572107585	0.00363555864545937	0.113197103399415	0.106781792264394	0.196997008785588	0.155780249135012
RNA45S5	42372.9582904821	1.12522882526013	6.771648336501e-23	1.14432698274413e-20	3.37818543797278	4.31799312219747	8.84520871686466	8.71581530896407
RNASE4	294.032811567366	-0.528919736722167	0.00345856723810656	0.0198294368136644	0.994893590577365	1.01862855826842	0.764379976774862	0.696266200173923
RNF11	3900.59710034125	-0.851644764697731	5.03650357689798e-19	5.74325196500578e-17	9.49016098683634	9.40015909766141	5.77312401696417	5.18722253106323
RNF141	2298.36980320078	0.391159373292167	4.63932489070781e-05	0.00053075995854052	2.85210645043873	2.7797815266661	3.9765560219546	3.7599140502414
RNF144B	536.73773497246	1.2458657779613	1.34370474187534e-13	8.52796502694277e-12	0.325315980064286	0.408673295433155	0.843476829875425	0.971194471770823
RNF149	1704.24395710574	0.337563930284513	0.000630309481109056	0.00483628051533677	2.86864896028386	3.00296786797163	3.81376651202543	3.95131974037795
RNF152	185.941620305762	-1.30876000636333	2.08005859160958e-08	5.45325267400298e-07	0.914516661022825	0.781595437597697	0.332739043699926	0.386322338500739
RNF157	729.490599462288	-0.428024362642236	0.000688669726835657	0.00520996849438885	0.958812685683035	1.02101371520904	0.774088868846348	0.765379796917337
RNF167	750.566686293632	-0.341420207067434	0.00906979024115609	0.0427462627427605	2.41398518016269	2.35184307271015	2.06728944839779	1.87292320063053
RNF213	36545.8356200934	0.337300080221445	0.00417548454029822	0.0229758125391223	7.79349478335808	8.30907475086783	9.34367398065398	11.9612075721287
RNF216P1	980.292977724697	0.385735275586952	0.000769596007727413	0.00573557577278677	2.05067323592376	1.99442116359352	2.75860234915591	2.77929400004737
RNF38	3166.01746957433	0.373604394115528	7.93093128540836e-05	0.000852077837504449	2.90474802220861	2.83239365932024	4.05004028420046	3.73461412158946
RNF8	768.983046194912	-0.350221384381468	0.00498990361061271	0.0264107124688505	0.888066522777898	0.849109210568216	0.702421444087897	0.725878629980989
ROBO1	5770.27350950238	0.352188941368448	0.00104928766765562	0.00730795172639049	3.83444846236259	3.58584700167898	5.34801824607223	4.57203874336728
ROBO2	505.146614491617	-1.20192168046143	3.44434182796845e-08	8.68890979839666e-07	0.523326541988389	0.37796626209783	0.238847230303307	0.172378297265592
RPIA	571.095805992001	0.421341808267371	0.00323388044593434	0.0187199369107202	1.59709172302008	1.47964905738173	2.22631969597329	2.09516329069076
RPL10A	10295.1733704348	-0.34262804783628	0.00171673854601344	0.0110657053521988	99.7305584861197	85.3877828721485	80.439820562627	72.5070822747704
RPL11	5875.28535381721	-0.404517731519531	9.86318805900438e-05	0.00101796229371299	61.8317161819667	60.1035306957741	51.9894402585083	44.4626996702196
RPL21	6672.92608426925	-0.831399739990829	1.52074041273337e-18	1.67952008102349e-16	46.0284347300701	41.4861720048535	26.3925692684056	25.1330621588702
RPL22	3285.26043168405	-0.32483087168698	0.00160832943543045	0.0104648895101049	10.6135940135218	9.64799026669475	8.84374278082672	8.10612859608132
RPL23	10807.335406581	-0.394083707861376	0.00240894761906066	0.0146585246442277	136.051051916833	109.853561464268	106.288378392797	89.7764355591072
RPL23A	6744.88750252824	-0.429305212782507	0.000603868711627248	0.00467431708017868	50.572838697468	41.6817405361834	38.6231658459358	33.1639109155527
RPL23AP53	1068.23106620685	0.325175676737406	0.00340251332518057	0.0195508610811072	0.928488568742569	0.967799850891392	1.23848992540181	1.24772111928208
RPL26	7433.47112873057	-0.345065706947298	0.000130600416712272	0.00129182048293818	51.2905291968371	49.1425371857582	43.2729798507049	39.5296407276093
RPL27	5233.00941612998	-0.41840125071643	6.84039162060621e-06	9.90127274206632e-05	72.2134883541478	69.0994170545556	57.9440729900425	52.7934809529369
RPL32	9804.41900513806	-0.418589676225178	1.69759029954396e-05	0.000220671005944427	36.165679821122	33.6189045634579	28.92551622446	25.7534032452874
RPL35A	6043.70869812199	-0.339163001645204	0.00159861216290963	0.0104216674364753	75.1893723211374	64.4300134642647	59.8722424764775	55.7852946102001
RPL4	25997.3856565267	-0.478410287494191	3.1544570622574e-06	5.02206750910582e-05	126.11979869128	116.82686986173	98.2178399336244	84.3827740462976
RPL5	13057.2538311687	-0.430894040724357	7.93393452004e-05	0.000852077837504449	89.9969548277166	78.149487859092	69.4532501315491	61.2068687165099
RPL6	9722.98159752805	-0.3507082946615	0.00021190871185345	0.00195284598715932	36.4972130106493	34.7663646374021	30.9721139723193	27.5487883360769
RPL7	10878.8038474284	-0.457011448388423	0.000392433348096502	0.00329005985678514	95.1681094712795	78.6939278496333	72.6409233639258	60.0478978284369
RPL7A	17225.9498330713	-0.39571356432981	0.000706730949448719	0.00532356931744787	138.671845800167	115.594426602889	107.75970711096	94.7208828580293
RPL9	10678.1367506992	-0.465511385848798	8.47006936443353e-06	0.000119278306130065	84.0875671426366	73.8191266808579	63.0562795066663	56.7414974346298
RPLP0P2	30.0269470458412	2.38817301505453	0.000404261552074238	0.00336908647022773	0.0193651451016991	0.0117712120556015	0.0535876572437801	0.120351392999977
RPS14	10575.8125007841	-0.323284737084412	0.00160266773552951	0.0104359413456532	91.6714858558635	81.2766249807054	76.1464718790012	68.6529352045211
RPS16	8503.3194537411	-0.367241883449589	0.000696873536959732	0.00526351547086549	84.1298566321379	73.6598685676773	67.974586787171	60.175844293722
RPS18	13331.354443304	-0.402327840782077	2.22664416401492e-05	0.000283145159061407	32.1833891137566	29.2342046528818	25.3902427725391	23.2844485632352
RPS23	10870.7178892237	-0.343380346702939	0.000624352638932196	0.00479582152993592	22.532459765892	19.89034696353	18.2457004737904	16.7830872844083
RPS24	7494.31568092243	-0.438956464000008	2.77937669128891e-05	0.000341063319965164	17.9318527457549	15.7400816598583	13.6442141263561	12.3784429865774
RPS27A	5770.20465227324	-0.377616624091594	0.000516924327534815	0.00412187641728443	29.4237243267905	25.4884463751803	23.2368048888518	21.0501589751932
RPS3	13353.3601097824	-0.382090014499488	0.000858866629891867	0.00624816563841459	34.6757009270563	28.9457362320935	26.9867249733895	24.1613348250783
RPS3A	10300.1087940584	-0.43884097238423	0.000101128054938528	0.00104066184781203	36.2622548581555	31.225356860108	27.8471428065695	24.3095040424558
RPSA	14597.332800418	-0.331514158768651	0.00141994156222882	0.00942997175749123	83.4751404332046	75.2766030902033	70.4984678198861	61.6348673975134
RPSAP58	505.492162946123	-0.419542397032274	0.00397966733216711	0.022132757335835	2.39855750185905	2.45530923544106	1.97041579537395	1.82817290046913
RRAD	273.66768903781	0.541150514758053	0.00363621093197067	0.0206400220687255	0.891326246273698	0.854609135418875	1.30275705716033	1.3611370281116
RRAGC	2983.15753111088	0.339801836523587	0.00199528111801201	0.0125328315992998	5.32691255663993	5.82700839149763	6.80712868308135	7.96659650819808
RRM1	3221.33576035792	-0.439593373255735	5.06311010113932e-05	0.000574556490927023	5.660440681085	6.35057549113304	4.30819413271325	4.95953383079933
RRM2B	2976.23517538936	-0.41851309503562	9.85527615512197e-06	0.000135652702013485	3.83795508620458	3.73601292935097	3.08307390436941	2.85170151646348
RRP15	2055.49407937776	0.542986910392007	1.33644593182154e-07	2.96597953160268e-06	1.17149488449221	1.32206873890213	1.92156863345005	1.87685401667537
RSU1	4605.91484028579	-1.10454760346296	2.95047455472079e-41	2.4343150649714e-38	9.463076983141	9.92395038433399	4.7299298502364	4.70739627870786
RTN2	413.192255731844	0.519999441793596	0.000873879642279688	0.00632784505039489	0.87063516414495	0.845104085801304	1.28920077434837	1.28940795302114
RUSC2	7754.87922145856	0.383375685403938	5.80592776801004e-07	1.11248555838946e-05	6.43929518580562	6.59202648221185	8.77114369482187	9.02557321595565
RWDD3	220.283424641783	-0.820744442161172	9.82237851972919e-05	0.00101524451818513	1.1694399489459	1.18039334753951	0.755376140431624	0.637264596197439
RYBP	2969.10665342203	0.451330179757206	4.78319800438711e-07	9.40941587791494e-06	3.33227577308601	3.1877918608971	4.65842562341942	4.68230638657804
S100A10	9845.81178745859	-0.445275189339356	2.35341691464225e-09	7.71238916933931e-08	61.3976889801519	63.1173506176051	47.7738946046345	47.9680646821596
S100A13	1809.96537467879	-0.355261882406089	0.00112030707831891	0.00772538204547738	8.86141857346297	7.89028038333264	6.75395298727743	6.97708325226514
S100A3	184.788933296179	-1.09794861959612	1.00347304021656e-06	1.82079079716396e-05	1.84992239792654	2.10278826741223	0.925384106093732	1.00433411782992
S100A4	6257.81920483956	-1.40568481184292	5.62907064825595e-65	1.31588908187397e-61	91.5333193755881	94.8759691681483	35.6220516421795	38.0421069827514
S100A6	37943.6720504703	-0.665352510173947	1.23312321321867e-12	6.75616647992384e-11	366.714773141238	422.04319294243	249.805451799926	270.731391250921
S1PR3	790.65231219407	-0.546987296738549	8.56190289754331e-06	0.000120175025603871	1.19785426372577	1.27846951719658	0.88856365779855	0.884580657851182
SAAL1	340.993444952925	-0.474433692858558	0.00601424889512625	0.0307195393310418	1.55242552539496	1.44183892670604	1.07563026020651	1.1848373585056
SACS	23996.7563361165	-0.723069294786738	8.3342358507458e-18	8.72358149571348e-16	10.8219315078548	10.9808709092176	7.24173458415251	6.58547337007686
SAE1	3642.42958927934	-0.450530122245555	1.67386643720831e-07	3.63431124586437e-06	9.05010198951187	9.54446113334164	6.97663777907082	7.26603186571969
SALL1	2170.99858761103	-0.597381732101338	7.63452909600228e-06	0.00010935698764891	2.9534720177982	2.68624110188627	2.17324943906095	1.73127073811615
SAMD14	558.264535823484	-0.616394340487475	9.44429192022732e-06	0.000130765684573651	1.19411726355415	1.17439242458363	0.827798145814757	0.790552710810979
SAMD3	291.606840468789	-0.87920861404596	1.02933870131767e-06	1.85572038877656e-05	0.82899888165237	0.839372783315937	0.458468682349898	0.49135301538027
SAMD4A	11338.5778960322	0.345711261949582	9.73530645580675e-06	0.000134264904964745	7.92626192506938	8.46465505009782	10.7297499233466	11.0728325654669
SAR1B	3152.44774052032	-0.905937100206815	6.95506320859589e-25	1.45599576960845e-22	3.48677032898402	3.66585382929588	2.02522521638237	1.97002486929294
SBK2	28.6662974347238	1.68872731562829	0.00397658680215981	0.0221291184168764	0.0711249142833961	0.079261743067804	0.300694829328757	0.204925963116254
SBNO1	3761.50602382467	-0.777726656237736	7.03229505632436e-20	9.21822153831826e-18	2.52215740515281	2.48333876553758	1.5512784590761	1.5062773377863
SBNO2	4472.25212882291	0.380121922258078	1.14066919111727e-05	0.000154729459135501	2.21156800422635	2.23597141996224	3.1259976385217	2.9339833904709
SCAF1	3512.54127426663	0.403231878312747	4.21408215855218e-05	0.000487679177853571	3.78410764394278	4.3369533830732	5.50606989732024	5.72652263417926
SCAP	3140.42097209136	0.486257353672142	1.36787556441039e-08	3.66841733583558e-07	3.53320677462042	3.55825427214956	5.16239000508792	5.23963011626238
SCARA3	8087.71329705239	-1.11550620748088	1.35422547439845e-43	1.26629110026084e-40	16.1116909250863	17.312067788778	7.96801217954328	8.17850247734822
SCARB2	13332.1072404898	-0.527082246301949	6.70072531523491e-10	2.40985572490987e-08	18.9775430641781	19.2261154791598	13.1374978552943	14.6258505320961
SCART1	304.918509073839	0.567539906200107	0.00152241813480304	0.0100156832827146	0.276088047372926	0.304850369358333	0.441845797109331	0.457775706660715
SCN1B	167.414140051319	-0.599124026262868	0.00838347980706126	0.0402418507097335	0.201826988451386	0.197452914308229	0.136798607538749	0.139394586711096
SCN5A	637.176113825212	-0.676776475834903	0.000214572833076549	0.00196963007783698	0.604179134758221	0.448865603364845	0.375220525730086	0.316503314389683
SCN7A	167.504902692254	-2.32489937575498	0.000954564546136696	0.00677224194441745	0.260841830219128	0.182389109872507	0.0671969064180643	0.025453247903794
SCP2	3736.01625362952	-0.636986935797555	1.62287972527948e-08	4.31926205441556e-07	7.44845572784218	6.76456561340119	5.15112747866472	4.42294173361426
SCUBE3	728.098726922643	-0.798650149060688	1.68775005432292e-08	4.47493048429741e-07	0.730549602524762	0.655245823935205	0.442715850056511	0.392608103145421
SDC1	286.872274047291	-0.547592366668572	0.00980309299479222	0.0454389234451275	0.511464677853814	0.659369346512112	0.373350117174276	0.462620237463748
SDC2	2430.55794349782	-0.338885024968738	0.00477837838682015	0.0254737876296235	4.76508353279817	4.24103090762512	4.01517098749155	3.4462963451913
SDR39U1	688.013729228089	0.523546288850058	5.53623996687647e-05	0.000620713843128772	2.25458617027423	2.4108299294604	3.46408764376898	3.5502016911682
SDSL	65.5980967196644	1.37902172423281	0.000235929420239231	0.00213907307580831	0.14004284956223	0.158014824737923	0.375729884927774	0.433296623064214
SEC11C	361.055926633901	0.674252374942347	0.000405770823016822	0.00337765077960472	1.73426393363554	2.18811528107679	2.98966937179291	3.53724780679009
SEC14L1	4555.9401825038	-0.502639486910714	1.52465255405638e-09	5.14057132769105e-08	5.02612834025023	4.86759881194015	3.61730712850112	3.69724755738107
SEC14L2	481.669896012347	-0.679714545908057	3.07299476347909e-06	4.9259228060066e-05	0.705274474308611	0.707363323588309	0.453735310716586	0.469860287041721
SEC16B	411.871217872213	-0.737653417654947	2.27536797650771e-06	3.76348009887939e-05	0.747947230130408	0.732117320381628	0.474239293489219	0.455638971579059
SEC23A	10018.9859545381	-1.45100111659469	4.77398268563437e-61	9.56569730695823e-58	20.6889968342456	20.3474763845207	8.24191284269503	7.47362343482421
SEC31B	1164.53479215166	0.727419861198992	7.5973480576305e-08	1.78493138787815e-06	1.18676977801856	1.00944779359295	2.02372595274531	1.79213777464769
SEC61A1	34736.5510284383	-0.329818796341224	3.83961267176919e-06	5.97055513683311e-05	61.7339168602934	61.3684176497428	51.5680868660601	50.9893209209104
SEC63	4594.76706607454	-0.600242503068859	2.04912227057519e-13	1.22824739175588e-11	4.95688129541646	4.89751237829656	3.4291978508539	3.37815506179154
SECTM1	479.833711331025	0.50081013580776	0.00439346322684393	0.0238570714787149	0.965383573087354	1.05097528495554	1.30532531570777	1.67956917714541
SELENOI	2399.24666014149	-0.489849840086168	1.0210975197771e-07	2.33255925283284e-06	1.9451338502995	2.04481548922324	1.45680366403498	1.51705978448343
SEMA3C	5027.9407324025	0.71760060868668	2.33102904407138e-07	4.93882377222736e-06	3.64374970370807	4.8711181994719	6.75974332795442	7.88088025813634
SEMA4F	1067.07565420993	0.386538988911202	0.00113727380384519	0.00782314976593069	0.844423469606855	0.909093386272176	1.14127987503892	1.25680470564478
SEMA6A	1085.55760033041	0.479972041169247	8.10949635095772e-05	0.000866289381710076	0.79192681970247	0.708397003941943	1.12520146925124	1.0699658359884
SEMA6D	851.557329254833	-0.816485077576142	3.07934802480976e-09	9.7496468162487e-08	0.869450718773625	0.937315955794004	0.581860299452455	0.49120431309124
SENP5	4812.84858949058	0.339502924123221	2.45397932375402e-05	0.000306496117497541	3.83142481610199	3.96448337657949	5.14761044679835	5.17861115246207
SEPHS1	1323.50755114857	-0.336403214426998	0.0015989896138097	0.0104216674364753	2.59266675656756	2.64998508701418	2.23454714207664	2.11206892454265
2010-09-01	6188.83838704994	-0.410055135860413	1.37976771873683e-06	2.410040102491e-05	7.49031119087089	7.27993386912202	5.9950460238353	5.64597115260649
2011-09-01	32560.7444624495	-0.479002112977237	6.91063383865056e-07	1.30289556361116e-05	39.1213594688561	36.4525207107676	30.1861129383647	26.59322245787
2006-09-01	670.165095383602	-0.87165380524172	2.34797349356052e-11	1.06578240196375e-09	0.887296997915978	0.867050505079077	0.510288217218005	0.494116455908111
2009-09-01	20962.1426148748	-0.533752070888883	5.48090129183792e-13	3.15061973439831e-11	19.1922200666736	20.0962055413304	13.968751549105	14.4432951683977
SERINC2	4724.98352463217	0.618616751701483	2.82889413574804e-13	1.68127411644076e-11	5.96784425364762	6.18486148221515	10.0049864625708	9.52590379039155
SERPINB6	3418.93155973902	-0.471014614818892	3.16263233062041e-07	6.45692591983725e-06	7.82869609166908	7.32158131113375	5.81635314412698	5.63541483099247
SERPINB7	4099.3280126288	-0.70355999268955	7.8683441848529e-17	7.12009003462883e-15	12.1202848624331	12.7127598285154	7.81467076277812	8.14777861100213
SERPINB9	269.831296660955	0.763734425694477	0.000441000288073171	0.00361935052107331	0.287104714235049	0.269957857202861	0.563713348976391	0.427704950445287
SERPINE1	35282.5675480739	-0.980076262576059	2.02477961666121e-42	1.77497243145563e-39	85.6360076984807	84.1785204341955	44.9154892690612	45.2334745709462
SERPINH1	21748.9218770341	-0.330201368648394	0.000306954353825725	0.00267080754761763	63.4581083830056	57.3075624058915	51.8463249002202	48.7714718300606
SESN2	3065.95744683078	1.03802967964899	3.22631064157131e-24	6.285032369261e-22	3.28048043036765	3.30489790855292	6.60627012083676	7.55633994056199
SETD7	7739.23695288304	0.324272392004354	6.55490144597291e-05	0.00071883540016588	4.50685960922356	4.70695751020374	6.18904108855868	5.8858012979309
SETDB2	498.767370459804	1.03634117211733	1.85372847913199e-11	8.55276172641623e-10	0.321257058574738	0.285518129072123	0.635417335707845	0.671864086739949
SFRP1	26374.2449529716	-0.328656770767608	0.0011403504374148	0.00784046825253922	35.8530072728473	40.2339474679101	29.3385756212238	34.0861134105937
SFT2D3	207.206503466849	-0.71744177472774	0.000895645852758188	0.00643891785278644	0.551907574815574	0.507782701480698	0.311872451750566	0.364291836538039
SFXN2	193.025966627178	0.573513205183411	0.0096545823261856	0.0448989296111005	0.329417733367205	0.372502348715025	0.570935572357995	0.519606423989444
SFXN5	675.136552595769	-0.537158591209826	2.9775407805601e-05	0.000362211509003781	0.834917050494479	0.858277144800929	0.617960708982453	0.603401638987558
SGCB	5473.09624882386	-0.70186551677612	3.97460911031672e-16	3.27928631654719e-14	9.11631413319201	9.21216320897303	6.11804542215277	5.67857793715653
SGCD	3812.10512778698	-1.55933293852707	1.24495323084388e-07	2.78052770952489e-06	3.50597132372812	2.98275597437695	1.36318926444898	0.942188547260645
SGF29	195.015989880181	0.591903312893698	0.00621805487116117	0.0315308885115353	0.744030869182651	0.821939455176972	1.21613504701976	1.2497918331471
SGMS2	2188.73867713208	0.422304516937763	0.000487536487379557	0.00392548035131209	1.66002527509111	1.64781674479664	2.54168981608223	2.09900320032008
SGO2	1200.53070850189	-0.518744177700888	0.00126138324704713	0.00853456894504729	1.46913028009998	2.03563174948275	1.19637345096014	1.35881678614045
SGPL1	4103.91695003697	-0.42528901298985	1.51379235580776e-05	0.000199178720286676	4.84275104317228	4.58881389364622	3.87295276967119	3.48331753187168
SGTB	2357.74017597816	-0.486676770301349	1.3946627469007e-06	2.43000493018997e-05	2.73922548915124	3.10307325763193	2.18414927232554	2.17658717700655
SH2D4A	1535.50824948713	0.536163765995508	1.71122150382072e-07	3.70394950811565e-06	2.03016656917652	2.11080379925389	3.05847032087461	3.22674231490632
SH2D5	2903.05142051106	0.816539601177554	1.48422328378657e-13	9.29362311535288e-12	3.01218371498492	3.33766362487349	5.41324898208895	6.28806965099444
SH3BGRL	4158.78723282255	-0.33466090223925	0.000408336388740715	0.00339296575146758	13.0944606225052	12.9310075440963	11.366486654037	10.242135399552
SH3BP2	2441.37965699531	-0.34786335822719	0.00121774278918771	0.00827522304319132	1.68167376813722	1.54784825490679	1.39961806987207	1.25917289904242
SH3BP5	204.849050384336	-0.74402027968954	0.000414360142556943	0.00343487905408019	0.425450491761512	0.408056557280089	0.249047614905739	0.272656639972674
SH3D21	821.556697666922	-0.507410524591836	0.000152516270995541	0.00146922611056557	2.31719261988792	2.00468898914348	1.59822346674283	1.59203180415461
SH3PXD2B	3531.26534977668	-0.670752151611045	1.82266841659545e-09	6.04367546363303e-08	3.33892998948268	2.94829240951864	2.1907167155503	1.94758835646045
SH3RF2	226.401347907725	0.792819286914884	0.00116431636730048	0.00798176997446555	0.256954237651829	0.376346112681391	0.515706188546401	0.624962047913692
SH3RF3	2660.77233506714	-0.425377272503142	4.74302164592718e-06	7.23104582671464e-05	3.00886639744888	3.28016125467096	2.43210294017708	2.46768553571551
SH3YL1	903.57430005612	0.386431545150492	0.0039813681461398	0.0221334401972877	0.618848238458392	0.634741851736803	0.925825270936401	0.789111830622973
SHB	4411.77341227437	-0.429710146882262	8.52451396478303e-05	0.000903057650075882	4.50504746371537	5.2320017071848	3.53388051396411	4.02997854974409
SHC2	43.0554906991661	2.08494167225343	1.65205607549482e-05	0.000215551055952468	0.0422999314798907	0.0332746772221294	0.16701723411523	0.172058928133695
SHCBP1	1557.84347835246	-0.438875140461069	0.00874268445777176	0.0416100754003077	1.66817250381022	2.27014797959133	1.32955216966194	1.70740056789263
SHROOM1	374.601752708521	-0.468780889692997	0.00420157049059575	0.0230831287509189	0.635200129512832	0.587143936121306	0.458089330915125	0.468305627037186
SHROOM3	5037.63553991001	-0.786782239702866	1.85927896327314e-08	4.8927292193e-07	3.6195394003695	3.07275745137782	2.28922287892653	1.77412764497957
SHTN1	618.638917975495	0.491928209222617	0.000269976544673233	0.00239967744967476	0.508077038884095	0.493504495993476	0.750677191070473	0.725367012630712
SIPA1L1	3370.19650625165	0.485856912253437	2.95109385545312e-07	6.09602981098461e-06	1.96502467567446	1.85870654233121	2.90028219839877	2.70976096241127
SIPA1L2	41.5028362052362	-1.29522187330096	0.00629883074798891	0.0318025198240794	0.0554831455527129	0.0477876603984793	0.0271570680717747	0.0169957642266821
SIRPA	2174.67947004675	-0.383993620374439	0.000143753171260548	0.00140116885344019	3.19266117183358	3.15128979312571	2.41096259001751	2.6814255237494
SIRT1	804.171568000606	-1.63628691277254	1.11011446393347e-39	8.65025859507272e-37	1.60105178978236	1.57073271278216	0.531497160299547	0.537294693423272
SIX1	576.062412346178	-0.537468614039723	9.56802939286267e-05	0.00099261228006133	1.49656137095447	1.43922452423773	1.07613300120468	1.04349691228019
SIX4	4155.83110984034	-0.536979581214429	2.48003587204465e-06	4.07795816427881e-05	4.80035364709682	4.2663937393492	3.51356351252323	3.03302375096975
SKAP2	1192.43404060983	0.965477708587471	2.31472555023777e-17	2.28636201180528e-15	1.10280670038885	1.08421379315221	2.31571682740241	2.15785979222099
SLA	223.09336818742	-0.909344380198327	0.00687688008581031	0.0341554957803029	0.557599073997388	0.371686516137752	0.348164209352732	0.171216731530432
SLC12A6	2420.35203143437	0.440667454452616	1.06501946906639e-06	1.91512347091348e-05	1.4139452896465	1.4506475616442	2.04659032690085	2.02341733191768
SLC13A3	129.226741185754	0.707077595859999	0.00736322043942833	0.0361485928888421	0.142136465362208	0.125411354887542	0.223018290182202	0.236043168903387
SLC14A1	2180.979136662	-0.68324636060005	4.16230094424754e-08	1.02601815543086e-06	3.68901435623451	3.30939105338472	2.48337064182188	2.08294377790125
SLC16A13	82.4956723485675	0.929272818253299	0.00678323061118427	0.0338100897485681	0.159756404293584	0.218386960505239	0.33804746813483	0.410078402034267
SLC19A2	567.810437355537	0.46202559417384	0.00108727100448173	0.00752939529275766	0.78338635478352	0.734923775781656	1.1202924430243	1.07289470638423
SLC1A2	777.491857826018	0.599748807950729	6.28184527449641e-06	9.14944567186778e-05	0.303870716545535	0.270240035553238	0.464994673029987	0.448148127483328
SLC23A2	3751.68344442693	0.597293315283526	6.70549602887768e-12	3.31166504581121e-10	2.49246153878336	2.4016375548986	3.92779277134538	3.82861928577953
SLC25A15	356.081886441296	-0.52916581556573	0.00499395619483978	0.0264160472550234	0.623497165773547	0.586130832572131	0.491456830154538	0.386854452754217
SLC25A24	2707.34861283688	-1.76523670389311	1.5645646709878e-74	4.38891681505498e-71	5.9048363532315	6.51508963119989	1.87951145967529	1.94351890447868
SLC25A25	1029.62032101575	0.417899248422134	0.000289628776487086	0.00254213593179466	1.13381933180767	1.18768717406057	1.56931597270137	1.67647304473724
SLC25A29	930.104066183957	0.391742866884566	0.00516465808724533	0.027133452245563	1.78521735522087	1.57456446045519	2.48389092919256	2.13944200172996
SLC25A30	830.263489748704	-0.590239704347579	1.94713487075636e-06	3.27072020326093e-05	1.38951203489465	1.53656357368656	1.00599539697573	1.02639580852813
SLC25A42	550.892320628297	0.511004243394795	0.000240808779029645	0.00217768145368781	0.795210369654266	0.796937087623783	1.18849888802386	1.18768566439719
SLC25A43	1172.52266804402	-1.04001824803758	3.43724669671778e-21	5.12881086895357e-19	3.4784807970789	3.69918667535053	1.8486785752558	1.80369668259664
SLC25A45	177.832945458191	-0.608899423480692	0.0109417715193358	0.0497533290377664	0.336833885117795	0.351620545105915	0.205221674818409	0.267379860211086
SLC25A51	1431.51627183193	-0.673199897370319	1.17055079841621e-10	4.69089871388163e-09	2.10800063154816	2.20700871932503	1.37330000384385	1.45906859377178
SLC26A11	823.039349962458	0.362563536929782	0.00566650820861349	0.0291878237730492	1.26023656670826	1.4732714833167	1.84665370284759	1.82402291355049
SLC26A2	1245.63214266306	-0.601907652172637	1.46745593500356e-07	3.23116749518995e-06	1.05054140808252	1.10169798428996	0.779758480017853	0.704120533701799
SLC27A1	1908.29234104493	0.46174252744455	5.13459380130689e-06	7.71219601689474e-05	2.54165692577772	2.62769218700294	3.86644432265477	3.58464151804232
SLC2A11	221.783203354237	0.868481637417021	3.70594167515034e-05	0.000436069949124653	0.121259803575687	0.110225449286935	0.210936580864049	0.232916808269873
SLC2A13	526.890001862571	-0.572456295784708	0.000286955406720755	0.00252340848568358	0.475857973746756	0.566440204286328	0.385239095054021	0.34676575858591
SLC2A14	243.536018825853	0.952476106202221	3.75695647735642e-06	5.87458991654417e-05	0.202165093141425	0.221030870438716	0.456310347752197	0.399292537061869
SLC2A3	11460.6595071501	0.881246412606193	7.62989113160427e-22	1.18907614457646e-19	12.5216061798284	11.1583647341948	22.697294340404	23.0082910033605
SLC30A1	1005.93286445422	0.589683542442408	9.20816621183229e-07	1.69493096177375e-05	2.16797937746013	2.44273066031925	3.55942031099786	3.69226771115408
SLC30A5	2404.43019697844	-0.648612994953002	7.75611856332374e-11	3.20906545631796e-09	3.51083306245057	3.63690331828985	2.50174457875737	2.27041156172157
SLC30A7	4297.47246840278	0.897535601874019	3.0948600266786e-21	4.66758136926817e-19	2.10732230668469	2.12012910708603	4.337691267037	3.90709898952275
SLC35B3	1353.57301773869	0.444295498155611	6.15941321354203e-05	0.00067918183752469	2.60741545009509	2.70313944071551	3.94612467831118	3.61576463956652
SLC35D1	3878.69979937744	0.672149332080059	3.32485752805325e-14	2.2420409465613e-12	2.71665243421486	2.63862833457506	4.58557967672037	4.35244317895001
SLC35E1	3155.6167990276	-0.48739389444822	1.0172797672983e-07	2.33120462038482e-06	4.18786860920967	4.1794967682006	3.23533993389757	3.0140610003427
SLC35F3	63.0513100983512	-1.40247411887187	0.000265379720192367	0.00236481318641559	0.128466564556726	0.176568180834023	0.0557044254093348	0.0644939897250577
SLC35F6	5427.63560570307	0.340866783393816	1.94627927543147e-05	0.000250445074469741	7.12570917186825	7.03650378932601	9.30937497854294	9.47588996953094
SLC35G2	819.739824365965	0.453460973435593	0.000185300203717959	0.00173499376324973	1.94001835372318	1.9457642102491	2.81910497447605	2.7529827137478
SLC36A4	1373.82189827919	-0.423781084613635	0.000124212228072075	0.00123560334109143	1.4803551458078	1.41479186118661	1.1746719431848	1.08646713154634
SLC37A2	475.502714101882	0.959257203982818	3.56883820058373e-06	5.61801622911195e-05	0.396356975855255	0.49641916808841	0.750303828186864	1.06218877183792
SLC37A4	487.001701092249	0.76569803640547	4.66425575606982e-07	9.22720045622501e-06	0.789118881931876	0.711488354037961	1.33649886118001	1.34203822786544
SLC38A6	2016.84118977921	-0.526265300182973	3.37415498729567e-06	5.34152345957213e-05	6.39236740682073	5.78706119059192	4.67419161086468	4.18801362877972
SLC39A6	6789.41681398179	-0.346114689749333	8.99800306483426e-06	0.000125328690156271	12.0165919668976	11.8807492789567	9.895010713969	9.79237618443451
SLC41A1	2973.49151997034	0.353206979349803	4.65080541849504e-05	0.000531639745719735	2.96119656334778	3.06177038629011	4.03351447475971	4.02001264460345
SLC41A2	1257.79960765637	-0.5169230046546	5.56382540623143e-06	8.27358258085079e-05	2.52848668895339	2.3018133529099	1.73841188827387	1.80109625582276
SLC41A3	1216.01696620749	0.618988249799387	8.18676596339346e-09	2.31507216537413e-07	1.92811463380326	1.91442230566906	3.10037672694957	3.08083926134457
SLC43A1	639.38510269458	-0.361494691350764	0.00983068060670719	0.0455366995342388	1.63430310572273	1.51571639583704	1.34531464402707	1.22508191362725
SLC45A4	441.270409109939	0.732272866522939	2.66756020392057e-06	4.34792402044561e-05	0.249860256932131	0.235364624945631	0.432959084739835	0.412430071190795
SLC46A3	171.980578981467	0.955551365561574	0.00023386666463904	0.00212311575289785	0.233825282647881	0.168753560390412	0.443214992684973	0.380596884262787
SLC4A3	98.5388341767524	0.771543746630569	0.0104733717655497	0.0480290740233776	0.10041502866062	0.0939982710265267	0.185857828254904	0.16231810620304
SLC4A4	3370.81087558319	-0.535520886445283	9.86512160899908e-07	1.79233414103395e-05	2.63488283032967	3.13195801511596	1.99847275952237	2.16298586556236
SLC4A8	630.466664256967	-0.462618829417665	0.00250083604578285	0.0150887904755015	0.284382480426596	0.357041672136424	0.241771425630674	0.244147747097507
SLC6A6	4295.42847572585	-0.790229751651808	2.60616168768717e-10	9.98743820532793e-09	4.99941960725842	4.1210844490877	2.94724048639749	2.5798693300311
SLC7A1	10998.0576106103	0.413200969142513	2.91118370667986e-07	6.03135342243599e-06	7.16315933336705	7.70537481622488	10.1183830544057	10.6059499062353
SLC7A5	11402.2622492899	0.396991146256773	3.6143784273324e-06	5.67061206060002e-05	12.5093890268716	12.4908711408362	16.3424255241256	18.133864938728
SLC7A6	3023.8484450995	-0.386791605813782	0.000151836541789113	0.00146368339184474	3.26489765433933	2.96904563108538	2.59015981497362	2.40593093100365
SLC9A8	1180.5711097032	0.572790423597775	2.16769148904132e-05	0.000276903832652947	0.792273146397664	0.947898219968634	1.25435993595195	1.45031737196182
SLFN11	2224.86037978463	-0.465746071773762	3.13559682508778e-06	4.99771375780468e-05	2.86170270287976	2.79664454123881	2.23722687388659	2.05366810288614
SLFN5	15022.4831783675	0.491265806956445	4.97927229062644e-06	7.52578374443173e-05	6.66975394845117	6.97671068520957	9.03250966380628	11.0557240450233
SLIT2	2904.30909372092	-1.08571135399695	3.45392644793083e-34	1.51389913620868e-31	2.81081648621075	2.85335493816231	1.3590626191296	1.43538146184572
SLITRK6	1520.2320254658	-0.494824966914419	0.000917606342184523	0.00655646793452884	2.60931129868832	2.30839352608671	2.06784193350272	1.58850260033084
SLX4IP	628.652570569879	0.462250121676139	0.00047822362791648	0.0038688359494088	0.502635029144197	0.506519410211755	0.723888289202169	0.732009049962034
SMAD2	5533.90688637405	-0.631910721877041	4.88568442168855e-11	2.08287567472959e-09	3.63008855731225	3.59212601246074	2.59009241635143	2.28948810047072
SMAD3	18711.8143258424	-0.41246919915203	7.17534763204027e-08	1.69715726622254e-06	18.9973620468992	18.3240607876019	14.8559345795994	14.5096438205126
SMARCA1	5409.14014154941	-0.392253573190336	9.68584767134888e-06	0.000133846009298857	8.70271240774946	8.58758345328512	7.18507490658425	6.60936569152747
SMARCC1	4398.09304869867	-0.53030699698687	4.08095136213616e-08	1.00951364736017e-06	5.39720052067573	5.04380181391307	3.95674474713807	3.61593750122706
SMARCE1	3129.51466146147	-0.396724299020005	1.5075678965666e-05	0.000198545984199466	8.65504427298465	8.3673739613356	6.96365815803156	6.57907956248395
SMCR8	3003.82159342945	0.518095344088472	1.26024917884007e-07	2.80575475911283e-06	1.72204886479517	1.71666342167548	2.43165837799439	2.72627192811538
SMIM14	2412.3530961226	-0.430358246129333	0.000275869057665067	0.00244476324034851	3.01819693888255	2.61534044660664	2.31564119789571	2.06618791285647
SMIM3	4486.01388470724	-0.46891792782167	8.73633569782925e-08	2.0456735308473e-06	12.6745191484301	13.1485043864774	9.3653447083543	10.1683733701769
SMIM7	1145.44542925223	-0.396041234085007	0.001079009656952	0.00748106250539236	3.9604519444461	3.64404962597473	3.17434018533408	2.88290982082066
SMOC1	508.345362119931	-0.568761194283821	0.00392915749144837	0.021930108625171	0.788711444693447	1.11532075070361	0.602490509220434	0.73711608984549
SMURF1	2977.27335853079	-0.365848154680445	2.15831196407087e-05	0.000275957006454494	3.32303177303564	3.40847363345553	2.71548634727797	2.75334047500262
SMYD2	1035.93613575852	-0.565854475069307	6.06958820028819e-07	1.15511593076312e-05	4.33474694583583	4.1518147731898	2.98371084945795	3.02417817824306
SNAI2	2189.33764289096	-0.610244854325047	2.10742828876626e-10	8.18803024327855e-09	7.22127914412625	7.29876572178135	4.78835557921633	5.17240094923837
SNAPC1	1486.44846538993	0.498979161938529	9.4795403430037e-07	1.73577066385078e-05	2.63085862816296	2.73707271886235	3.99916981853399	3.93996747791717
SNAPC3	2264.07372996766	-0.338245635091999	0.000396293224245736	0.00331647300911139	4.58756846157215	4.86660700033807	4.00782001954895	3.81754135876286
SNAPIN	931.642844426039	0.42704286650176	0.000261078567781824	0.00233241273357189	4.40648254002477	4.33078780423982	6.03135430041595	6.27615866963792
SNHG18	615.859086253262	-0.36587120602475	0.0105375452838503	0.0482847468641897	2.60829218696466	2.79041845971724	2.3289188630661	2.05283647058723
SNHG3	1948.32131962353	-0.458648507261781	1.96196249873984e-06	3.29168492910587e-05	5.53376693495543	5.58906782128497	4.11057462940292	4.36498018972049
SNN	722.747751507783	0.437336451326646	0.00116794960578319	0.00799105422961708	1.12812856265996	1.02506000946101	1.5772610846627	1.4813908184998
SNRNP35	270.805010757034	-0.835432097412183	5.92365995642012e-06	8.70914617911411e-05	0.82979552888424	0.816935635688178	0.482760643482373	0.484030417803506
SNTB2	12963.1064809683	-0.45361780079785	1.12079086866461e-07	2.5314352212383e-06	8.98107453422488	8.75903587148092	7.07514814177398	6.4887663841565
SNX11	919.5009267486	0.513886573133011	3.96008627796745e-05	0.000462482682221244	1.35883278741742	1.28578538450291	1.87976358480943	2.07953630142224
SNX21	964.547204748395	-0.346332763906794	0.00325066536035256	0.0188093367757034	1.87494790135669	2.05121873142892	1.62920486004552	1.60042092661418
SNX29	3763.84437397021	-0.5014621448479	1.08092899283494e-06	1.94124328469948e-05	3.31043844542116	2.92865596087943	2.37287053899858	2.24578516801761
SNX29P2	109.948067535502	-0.997261786575569	0.0010144457316148	0.00710720071509951	0.540302542857559	0.52881334663666	0.330030269557665	0.230740052390362
SNX5	2723.16500948233	-0.512005693305167	8.78871255074171e-09	2.46540964473406e-07	7.1015862610139	7.47275161237871	5.36748186726022	5.32902411162641
SNX7	1335.04692341417	-0.411929323362097	6.77006812082264e-05	0.000737816437161292	4.62888403336069	4.66774786539031	3.67666826391776	3.6398787136379
SOCS1	386.881924994912	-0.463721480173512	0.00398964078224814	0.0221530885240746	2.16381174259865	2.10197449486292	1.67291933513446	1.56795708736997
SOCS2	728.217091885254	-0.479328145209882	0.00151007168784741	0.00996173587856745	1.21232516163207	1.29105068720006	1.04009865407439	0.838212328719204
SOD2	33444.5173903981	0.488109562615283	5.52131100692183e-08	1.33290719764347e-06	19.3016587636078	21.517340219104	28.5474429565112	31.3828062330873
SORBS3	3966.65868241295	-0.372866887565394	8.6059662974368e-06	0.000120586696591257	7.71972877907044	8.05856531935628	6.44127934214612	6.31261113987035
SORL1	723.110447890834	-1.39494233718386	2.42478888497623e-17	2.37832789515221e-15	0.597773694631023	0.505954006193765	0.244536488042949	0.195532200294102
SOWAHC	661.18722968432	-0.417761213358532	0.00158189009734107	0.010331042598322	0.928047173350562	0.952193425563452	0.706647261917273	0.76696525880059
SOX11	427.434638212207	-0.825318529835041	8.15483669771788e-07	1.52100717449722e-05	0.367968851327446	0.356923292487631	0.233314590150648	0.195186483282509
SOX6	1610.22893844881	-0.621639454765128	0.000476751212243287	0.00386471414741071	1.39516080993607	1.01307478827134	0.928040010902376	0.713504199883302
SOX9	1983.79272693261	-0.497926890662586	5.04812262547795e-06	7.61343741343589e-05	3.18485126311793	3.65151435895109	2.43652416957477	2.62656160331827
SP100	9495.97591549235	0.581101140429722	8.03484659448097e-05	0.000860280597970916	5.22222221386147	6.29672884529972	7.59013401873167	10.4475885635853
SP4	512.419932787465	0.830302766425679	6.57258722102209e-07	1.24577173462238e-05	0.304657231508945	0.382115865758084	0.670614522413261	0.602399480057366
SPAG16	418.715055211038	-0.658580106081357	5.74720464905023e-05	0.000640026210490745	0.944022130026069	1.04045944072205	0.697943299634322	0.616263401710187
SPAG5	1461.42988622221	-0.511460675118109	0.00151724232876475	0.00999100511889875	2.27496998020797	2.95074734556606	1.67131268991464	2.16155600619526
SPATA13	2978.02630260859	-0.490866739926331	1.06721191617185e-05	0.000145751843585456	1.95039599873295	1.77467204158025	1.48192619920146	1.29514193462704
SPATA2	571.727175522662	0.464467582005223	0.000897913754397929	0.0064464823285924	0.627051617998478	0.66505297380341	0.956324000218447	0.908431536653679
SPC24	728.415919842254	-0.621348721865137	0.000263261777640761	0.00234892474121458	1.66201834310475	2.19754453354876	1.18940715309748	1.43106993991765
SPEG	2806.99462391213	0.372534914294706	0.000162740084602556	0.00155808356766925	1.22556365647705	1.20549001873942	1.72919724460991	1.5666511543279
SPHK1	776.02226764995	-0.707861565449535	0.000150182229460999	0.00144972880276667	1.99566023667626	2.52087013948939	1.20057588946015	1.69061090039772
SPHK2	494.802353224074	0.563940834989458	0.000210706045034236	0.00194395738283321	0.663726267339816	0.76702091043602	1.08548295124349	1.12298247239093
SPIRE2	105.221021082147	0.811404447473422	0.00587737847919564	0.0301697496076322	0.131994378919425	0.140699367279886	0.228438800175485	0.272075051089227
SPNS1	1690.91718643793	0.361513070123176	0.00177807324972256	0.0113825903243307	3.61739128553183	4.12872736268332	4.91134818223348	5.49548498086204
SPOCD1	4316.84444107108	-0.440142115023383	0.000835431155510479	0.00610936255849321	6.39517009917139	8.1332331071151	5.13078460774027	6.07015228789159
SPON2	8160.10164335587	-0.375901346661366	9.90390261537101e-06	0.000136188370669798	20.5209806560818	22.5475499715825	16.9727808524367	17.7629846640205
SPPL2A	3744.13349038766	-0.378106549983677	0.000284237626218181	0.00250264717221357	12.8946131731622	11.5344949205044	10.2697671519391	9.42638968431312
SPPL2B	1365.19512248975	0.368695061201835	0.00172251328975733	0.0110978279293231	1.72424317103536	1.89249617675051	2.29034695149996	2.5947318674307
SPPL3	2225.62366385694	0.429125758371291	3.40708661947036e-06	5.375455222125e-05	2.60760489660394	2.70928885079205	3.69626249363419	3.79688186153063
SPRY2	1733.89379824941	0.469571256116667	0.000101771672733986	0.00104478690354351	2.27049084532411	2.60837033071582	3.28044684457729	3.78436412344821
SPRYD3	1623.70861807694	0.516837852653679	1.22458096871159e-05	0.000165141892952029	2.57580987536918	2.69736200127446	3.6260170660317	4.27258910153016
SQLE	1886.29830303954	-0.364807890489919	0.00772133488066061	0.037656273656518	4.35994058868359	3.85366404981208	3.70594982208912	2.97733665237279
SQRDL	1933.5132885973	0.433661421545358	1.95377455977398e-05	0.000251179119847753	4.38012290506933	4.35310658218657	6.42169384644702	5.93034055409281
SQSTM1	23893.5417903509	0.78073722058651	4.18362480859207e-14	2.78101997939869e-12	29.4563693921968	31.5330869999543	49.8680117699395	59.8458448104374
SRD5A3	1446.56074785289	-0.606748671810574	2.78772160947132e-09	8.90673879144528e-08	2.42234709447771	2.52967125631062	1.6781937520532	1.72540713063111
SRGN	1692.60180114407	0.53505096541898	9.22812664814333e-07	1.6960508989096e-05	5.54529883588762	5.01322928768536	8.19521444858867	7.84785603612507
SRP14-AS1	143.280078079865	1.58763060619432	7.33807721471528e-09	2.11342650951943e-07	0.108411936364797	0.142477757968177	0.417241246913167	0.365722983038724
SRP9	4161.37964051241	-0.402966292632277	8.33271102450996e-07	1.54800801099042e-05	16.6556548501803	17.1916372217976	13.3435429381678	13.4549936969802
SRPRA	6167.02520380082	0.375745614145106	3.12148308692781e-05	0.000377488501177862	10.5046460765196	9.57088623678651	13.7206386335199	13.5738581932484
SRPX	2815.37870761812	-0.384115421515333	2.5733086915145e-05	0.000317722074887169	9.83512175198033	9.54154778993567	7.94099807816395	7.61042045629714
SRSF1	9226.30994257174	-0.651782207422476	1.00715125042026e-17	1.03111703929887e-15	11.3918687969402	11.7281886197258	7.78067084713489	7.62511572410349
SSBP3	1382.7515684825	-0.585130367137593	5.56673709303236e-07	1.07546906979162e-05	3.02081980750537	2.87674820992519	2.18508226513631	1.93313930801046
SSR1	10513.2619813649	-0.389469577545968	2.00871145206409e-06	3.36609161608732e-05	7.01817234192698	7.09328711081296	5.84182753847459	5.43646316440132
SSR2	4956.60993370084	-0.346572425929045	4.6989539963855e-05	0.00053626955861109	29.3443267073557	27.7534076623571	23.4978686399289	23.5442304739164
SSTR1	553.575237042369	-0.631481463267893	0.000230238164062018	0.00209424156234362	0.780948575265022	1.03661282022156	0.586954064427328	0.63752223563963
ST3GAL3	1015.04015251114	0.464645341409379	0.000123420928734171	0.00123034964209345	1.65124219477848	1.78386065408871	2.35688911488313	2.60182750600071
[truncated: 406 more rows]
