# Supplementary material for: Integrated analysis of H2A.Z isoforms function reveals a complex interplay in gene regulation
Source: eLife. 2020 Feb 28;9:e53375. doi: 10.7554/eLife.53375 (PMC7048395; doi:10.7554/eLife.53375)
Supplement: Supplementary file 13. [file elife-53375-supp13.xlsx]

## Sheet: Feuil1
List of siRNA
siRNA Name	siRNA sequence 5’-3’
Ctrl	GUCAGAGUAUCAUACGUAA
Ctrl #	GACACAGUUCGAGUACUAA
H2A.Z.1	GUAGUGGGUUUUGAUUGAG
H2A.Z.2	GGUGACAGUUGUGUGUUGA
H2A.Z.2 #	GGAAAAGCAUAGACAAUUA
SIRT1	siGenome Human SIRT1 siRNA- Dharmacon M-003540-01
PHF14	siGenome Human PHF14 siRNA- Dharmacon M-020678-01
List of CRISPR primers
CRISPR primers	Sequence 5’3’
Primer Guide H2AZ.1 FW	ACACCGCCTGAGATAACAAGGAATCCG
Primer Guide H2AZ.1 RV	AAAACGGATTCCTTGTTATCTCAGGCG
Primer Guide H2AZ.2 FW	ACACCGCCAGTTACAGTACAATGACGG
Primer Guide H2AZ.2 RV	AAAACCGTCATTGTACTGTAACTGGCG
Primer Guide PHF14 FW	CACCGCAGAGTTGGGTCTCATGAA
Primer Guide PHF14 RV	AAACTTCATGAGACCCAACTCTGC
FW out out H2A.Z.1	AGCGTATTACCCCTCGTCAC
RV out out H2A.Z.1	TGTGCTTAGTTATTGCTGCTAGA
FW out out H2A.Z.2	CCTTCATTTGATATGCTAATCATGG
RV out out H2A.Z.2	CACCACATGAAAAGGTACTTTTATC
List of RT-qPCR primers
Gene	Primer for RT-qPCR	Sequence (5’-3 ’)
H2A.Z.1	Forward	CCTTTTCTCTGCCTTGCTTG
	Reverse	CGGTGAGGTACTCCAGGATG
H2A.Z.2	Forward	GGTCTGTAACAGGGCAGAGG
	Reverse	CTGGCCAATCAACACATGAC
ZDHHC20	Forward	TCTACTTGTCCAATTCTGAAAAG
	Reverse	TCACAGGCTGAGCAGTGATGC
RRM2	Forward	TTCTTTGCAGCAAGCGATGG
	Reverse	TTGGCTAAATCGCTCCAC
PLAT	Forward	TGTCTCCTTTCTATTCGGAGCG
	Reverse	AAGTCATGCGGCCATCGTTC
COLEC12	Forward	TGTCACAGGTGGCATGGAAAC
	Reverse	GAGTTCTGAGTTGGTGCTGA
AKAP12	Forward	GATCTCCTGTACAGTAGTGC
	Reverse	GTCGTGAACAACCGCTGACT
ADAMTS1	Forward	CAGAGCACTATGACACAGCA
	Reverse	CTTCTATGACGGAGCAGCTT
GAPDH	Forward	TGACAACGAATTTGGCTACAGC
	Reverse	CTCTTCCTCTTGTGCTCTTGC
SIRT1	Forward	TCAGTGGCTGGAACAGTGAG
	Reverse	CTCTGGCATGTCCCACTATCA
PHF14	Forward	ACTTGCAAGGGAACTGGAGA
	Reverse	ATTGCCTCCGAGGATGAGCTG
List of ChIP primers
Gene Region	Primer for ChIP	Sequence (5’-3 ’)
P21 promoter	Forward	GTGGCTCTGATTGGCTTTCTG
	Reverse	CTGAAAACAGGCAGCCCAAGG
GAPDH promoter	Forward	AAATTGAGCCCGCAGCCTCC
	Reverse	GCGACGCAAAAGAAGATGCG
AKAP12 promoter	Forward	CTGCAGAACCCGCTGACCA
	Reverse	TTGCTGAGCTCCAGGACTTC
RRM2 promoter	Forward	GGCAAATCAGAAAGCCACATAG
	Reverse	GTACTACTCATTGGGCGTCAA
PLAT promoter	Forward	ATGGGCTGTGCTGCTTCCAC
	Reverse	TCCGGCCTCCTTTAAGTTTCC
Actin Beta promoter	Forward	TGGACTTCGAGCAAGAGATG
	Reverse	GAAGGAAGGCTGGAAGAGTG
